# Supplementary material for: NF-κB drives acquired resistance to a novel mutant-selective EGFR inhibitor
Source: PubMed Central journal article supplement (PMC4767465; doi:10.18632/oncotarget.3956), 2015-04-29
Supplement: oncotarget-06-42717-s002.pdf [file oncotarget-06-42717-s002.pdf]

| ensembl_gene_id  | NCI-H1975   | Test1 (H1975CR) | gene_biotype     | chromc | start_position | end_position | gene_id  |
|------------------|-------------|-----------------|------------------|--------|----------------|--------------|----------|
| ENSG00000000003  | 7.593829938 | 8.211532164     | protein_coding   | X      | 99883667       | 99894988     | TSPAN6   |
| ENSG000000000419 | 8.318496529 | 8.598211347     | protein_coding   | 20     | 49551404       | 49575092     | DPM1     |
| ENSG000000000457 | 5.472368541 | 5.726093467     | protein_coding   | 1      | 169821804      | 169863408    | SCYL3    |
| ENSG000000000460 | 6.372135143 | 6.807590479     | protein_coding   | 1      | 169631245      | 169823221    | C1orf112 |
| ENSG000000000938 | 0.869158192 | 1.353254395     | protein_coding   | 1      | 27938575       | 27961788     | FRG      |
| ENSG000000000971 | 5.239686603 | 1.353254395     | protein_coding   | 1      | 196621008      | 196716634    | CFH      |
| ENSG00000001036  | 9.807018378 | 9.873397164     | protein_coding   | 6      | 143816614      | 143832827    | FUCA2    |
| ENSG00000001084  | 8.241782151 | 8.080102494     | protein_coding   | 6      | 53362139       | 53481768     | GCLC     |
| ENSG00000001167  | 9.389186877 | 9.785641795     | protein_coding   | 6      | 41040684       | 41067715     | NFYA     |
| ENSG00000001460  | 6.640654398 | 6.149127429     | protein_coding   | 1      | 24683489       | 24743424     | C1orf201 |
| ENSG00000001461  | 8.421213901 | 8.35545848      | protein_coding   | 1      | 24742284       | 24799466     | NIPAL3   |
| ENSG00000001497  | 10.35389236 | 10.56493943     | protein_coding   | X      | 64732462       | 64754655     | LAS1L    |
| ENSG00000001561  | 1.407729925 | 2.971122874     | protein_coding   | 6      | 46097701       | 46114435     | ENPP4    |
| ENSG00000001617  | 8.357195795 | 7.728957399     | protein_coding   | 3      | 50192478       | 50226508     | SEMA3F   |
| ENSG00000001629  | 9.92763636  | 9.321350625     | protein_coding   | 7      | 91875548       | 92030698     | ANKIB1   |
| ENSG00000001630  | 5.899377978 | 5.137803333     | protein_coding   | 7      | 91741465       | 91772266     | CYP51A1  |
| ENSG00000001631  | 8.207901394 | 7.73528765      | protein_coding   | 7      | 91828283       | 91875480     | KRIT1    |
| ENSG00000002016  | 7.537174746 | 7.582164879     | protein_coding   | 12     | 1021243        | 1100356      | RAD52    |
| ENSG00000002079  | 5.806547963 | 3.493416095     | pseudogene       | 7      | 98836417       | 98908753     | MYH16    |
| ENSG00000002330  | 7.269909329 | 7.635032283     | protein_coding   | 11     | 64037302       | 64052176     | BAD      |
| ENSG00000002549  | 9.093128531 | 9.551614431     | protein_coding   | 4      | 17578815       | 17609595     | LAP3     |
| ENSG00000002586  | 9.703551077 | 10.31565348     | protein_coding   | X      | 2609220        | 2659350      | CD99     |
| ENSG00000002587  | 5.889353623 | 2.039052734     | protein_coding   | 4      | 11394774       | 11431389     | HS3ST1   |
| ENSG00000002726  | 1.799000381 | 0.390640832     | protein_coding   | 7      | 150521715      | 150558592    | ABP1     |
| ENSG00000002745  | 2.671945279 | 2.144285137     | protein_coding   | 7      | 120965421      | 120981158    | WNT16    |
| ENSG00000002746  | 6.188122351 | 5.248158938     | protein_coding   | 7      | 43152198       | 43602938     | HECW1    |
| ENSG00000002822  | 8.911889356 | 8.83570377      | protein_coding   | 7      | 1855383        | 2272878      | MAD1L1   |
| ENSG00000002834  | 12.10252306 | 11.39239264     | protein_coding   | 17     | 37026256       | 37078023     | LASP1    |
| ENSG00000002919  | 7.423680977 | 7.145279744     | protein_coding   | 17     | 46184911       | 46200105     | SNX11    |
| ENSG00000003056  | 9.856739382 | 9.927841127     | protein_coding   | 12     | 9092959        | 9102551      | M6PR     |
| ENSG00000003096  | 3.698846687 | 4.127774132     | protein_coding   | X      | 117031776      | 117251303    | KLHL13   |
| ENSG00000003137  | 5.958104008 | 5.004391715     | protein_coding   | 2      | 72356367       | 72375167     | CYP26B1  |
| ENSG00000003147  | 3.448790144 | 3.279072565     | protein_coding   | 7      | 8152814        | 8302317      | ICA1     |
| ENSG00000003249  | 7.0218028   | 6.50081754      | protein_coding   | 16     | 90071273       | 90086536     | DBNDD1   |
| ENSG00000003393  | 8.888175056 | 8.644911378     | protein_coding   | 2      | 202565277      | 202645912    | ALS2     |
| ENSG00000003400  | 7.575190993 | 6.980975423     | protein_coding   | 2      | 202047604      | 202094129    | CASP10   |
| ENSG00000003402  | 7.916116295 | 8.326402026     | protein_coding   | 2      | 201980827      | 202029033    | CFLAR    |
| ENSG00000003436  | 9.809013881 | 9.51467792      | protein_coding   | 2      | 188328957      | 188430487    | TFPI     |
| ENSG00000003509  | 7.633406721 | 7.955508102     | protein_coding   | 2      | 37458774       | 37480546     | C2orf56  |
| ENSG00000003756  | 8.874265427 | 9.124010896     | protein_coding   | 3      | 50126341       | 50156454     | RBM5     |
| ENSG00000003987  | 3.211941663 | 3.813624741     | protein_coding   | 8      | 17155539       | 17271037     | MTMR7    |
| ENSG00000003989  | 6.788216822 | 6.167968749     | protein_coding   | 8      | 17354597       | 17428082     | SLC7A2   |
| ENSG00000004059  | 9.697818752 | 9.370979666     | protein_coding   | 7      | 127228399      | 127231759    | ARF5     |
| ENSG00000004139  | 5.741167503 | 6.235021771     | protein_coding   | 17     | 26691378       | 26728046     | SARM1    |
| ENSG00000004142  | 11.15660165 | 10.77947409     | processed_transc | 17     | 26673659       | 26684545     | POLDIP2  |
| ENSG00000004399  | 8.723027268 | 7.563312496     | protein_coding   | 3      | 129274018      | 129325661    | PLXND1   |
| ENSG00000004455  | 10.3557137  | 10.5557289      | protein_coding   | 1      | 33473585       | 33546597     | AK2      |
| ENSG00000004468  | 0           | 0.390640832     | protein_coding   | 4      | 15779898       | 15851069     | CD38     |
| ENSG00000004478  | 11.31757708 | 10.91320863     | protein_coding   | 12     | 2904119        | 2914576      | FKBP4    |
| ENSG00000004487  | 10.36885012 | 10.51369144     | protein_coding   | 1      | 23345941       | 23410182     | KDM1A    |
| ENSG00000004534  | 9.662202373 | 10.39075874     | protein_coding   | 3      | 49977440       | 50137478     | RBM6     |
| ENSG00000004660  | 6.579622637 | 5.700439663     | protein_coding   | 17     | 3763609        | 3796338      | CAMKK1   |
| ENSG00000004700  | 8.942510063 | 9.018963395     | protein_coding   | 12     | 21621845       | 21654603     | RECLL    |
| ENSG00000004766  | 8.074911866 | 8.177844832     | protein_coding   | 7      | 92861653       | 92988338     | CCDC132  |
| ENSG00000004776  | 10.2752422  | 9.81083605      | protein_coding   | 19     | 36245470       | 36247930     | HSPB6    |
| ENSG00000004777  | 7.31554162  | 7.195117037     | protein_coding   | 19     | 36266417       | 36279724     | ARHGAP33 |
| ENSG00000004779  | 8.708847212 | 9.315729406     | protein_coding   | 16     | 23592323       | 23607677     | NDUFAB1  |
| ENSG00000004799  | 5.158541613 | 1.16600992      | protein_coding   | 7      | 95212811       | 95225828     | PKD4     |
| ENSG00000004838  | 2.238690726 | 3.532712221     | protein_coding   | 3      | 50378541       | 50384283     | ZMYND10  |
| ENSG00000004848  | 0.499066092 | 1.667587519     | protein_coding   | X      | 25021811       | 25034065     | ARX      |
| ENSG00000004864  | 9.646664866 | 9.15109385      | protein_coding   | 7      | 95749532       | 95951459     | SLC25A13 |
| ENSG00000004866  | 7.757079669 | 7.655203404     | protein_coding   | 7      | 116593292      | 116870157    | ST7      |

|                 |             |             |                |    |           |           |           |
|-----------------|-------------|-------------|----------------|----|-----------|-----------|-----------|
| ENSG00000004897 | 9.693504511 | 9.721192935 | protein_coding | 17 | 45195069  | 45266788  | CDC27     |
| ENSG00000004939 | 1.16343121  | 0.390640832 | protein_coding | 17 | 42325753  | 42345509  | SLC4A1    |
| ENSG00000004948 | 0.869158192 | 0.950786998 | protein_coding | 7  | 93053799  | 93204042  | CALCR     |
| ENSG00000004961 | 8.610066544 | 8.953504395 | protein_coding | X  | 11129421  | 11141198  | HCCS      |
| ENSG00000004975 | 9.747220804 | 10.11989792 | protein_coding | 17 | 7128660   | 7137868   | DVL2      |
| ENSG00000005001 | 7.030950614 | 2.912743273 | protein_coding | 16 | 2902728   | 2908171   | PRSS22    |
| ENSG00000005007 | 11.19703742 | 11.03109593 | protein_coding | 19 | 18942744  | 18979038  | UPF1      |
| ENSG00000005020 | 9.012297947 | 8.265014588 | protein_coding | 7  | 26706681  | 27034858  | SKAP2     |
| ENSG00000005022 | 11.99195722 | 12.25254279 | protein_coding | X  | 118602363 | 118605282 | SLC25A5   |
| ENSG00000005059 | 7.751556534 | 8.282410365 | protein_coding | 4  | 110481361 | 110609874 | CCDC109B  |
| ENSG00000005073 | 0.499066092 | 0           | protein_coding | 7  | 27221129  | 27224842  | HOXA11    |
| ENSG00000005075 | 7.754320745 | 7.782918269 | protein_coding | 7  | 102113565 | 102119354 | POLR2J    |
| ENSG00000005100 | 10.39166588 | 10.39509645 | protein_coding | 17 | 5344232   | 5372236   | DHX33     |
| ENSG00000005102 | 7.759833327 | 7.129345795 | protein_coding | 17 | 41717756  | 41739322  | MEOX1     |
| ENSG00000005108 | 0.499066092 | 0           | protein_coding | 7  | 11410064  | 11871824  | THSD7A    |
| ENSG00000005156 | 8.674235392 | 8.458531597 | protein_coding | 17 | 33307542  | 33332083  | LIG3      |
| ENSG00000005175 | 7.578314254 | 7.699043321 | protein_coding | 12 | 48057070  | 48099844  | RPAP3     |
| ENSG00000005187 | 5.036678094 | 4.794098771 | protein_coding | 16 | 20621565  | 20808903  | ACSM3     |
| ENSG00000005189 | 6.84118134  | 7.492830145 | protein_coding | 16 | 20817751  | 20860990  |           |
| ENSG00000005194 | 9.46032044  | 9.885305703 | protein_coding | 16 | 57462081  | 57481440  | CIAPIN1   |
| ENSG00000005206 | 9.507778518 | 9.772364814 | protein_coding | 19 | 2328629   | 2355099   |           |
| ENSG00000005238 | 7.337827682 | 8.049948078 | protein_coding | 9  | 35104109  | 35115999  | FAM214B   |
| ENSG00000005243 | 4.165528823 | 6.1803943   | protein_coding | 17 | 46103535  | 46115139  | COP22     |
| ENSG00000005249 | 4.517578978 | 6.123616685 | protein_coding | 7  | 106685094 | 106802256 | PRKAR2B   |
| ENSG00000005302 | 7.624369505 | 8.618900187 | protein_coding | X  | 11776278  | 11793870  | MSL3      |
| ENSG00000005339 | 10.38410065 | 10.28289766 | protein_coding | 16 | 3775055   | 3930722   | CREBBP    |
| ENSG00000005379 | 4.261916566 | 5.816437314 | protein_coding | 17 | 56378598  | 56406152  | BZRAP1    |
| ENSG00000005436 | 7.461385447 | 7.505230566 | protein_coding | 2  | 75879126  | 75938115  | GCFC2     |
| ENSG00000005448 | 7.444369108 | 8.120964787 | protein_coding | 2  | 74648805  | 74652882  | WDR54     |
| ENSG00000005469 | 6.335686705 | 6.057793599 | protein_coding | 7  | 86974997  | 87029111  | CROT      |
| ENSG00000005471 | 0.499066092 | 0.697730409 | protein_coding | 7  | 87031013  | 87109751  | ABCB4     |
| ENSG00000005483 | 9.837316871 | 9.25681271  | protein_coding | 7  | 104654626 | 104754808 | MLL5      |
| ENSG00000005486 | 9.543374069 | 8.700968226 | protein_coding | 7  | 75471920  | 75518244  | RHBDD2    |
| ENSG00000005700 | 9.628700366 | 9.500501806 | protein_coding | 6  | 82879700  | 82957471  | IBTK      |
| ENSG00000005801 | 8.006999229 | 8.260632671 | protein_coding | 11 | 3360491   | 3400448   | ZNF195    |
| ENSG00000005810 | 9.195324263 | 9.143180916 | protein_coding | 13 | 77618792  | 77901185  | MYCBP2    |
| ENSG00000005812 | 7.740446424 | 7.933654619 | protein_coding | 13 | 77566740  | 77601330  | FBXL3     |
| ENSG00000005844 | 0           | 0.697730409 | protein_coding | 16 | 30483979  | 30534289  | ITGAL     |
| ENSG00000005882 | 6.777386522 | 6.915587884 | protein_coding | 17 | 48172101  | 48189516  | PKD2      |
| ENSG00000005884 | 12.62804711 | 10.90551078 | protein_coding | 17 | 48133332  | 48167848  | ITGA3     |
| ENSG00000005889 | 8.753741308 | 8.936206949 | protein_coding | X  | 24167290  | 24234372  | ZFX       |
| ENSG00000005893 | 11.08402209 | 11.27798894 | protein_coding | X  | 119561682 | 119603220 | LAMP2     |
| ENSG00000005955 | 8.964161368 | 9.0050596   | protein_coding | 17 | 34900773  | 34946278  | GGNBP2    |
| ENSG00000005961 | 5.191549282 | 4.566889334 | protein_coding | 17 | 42449550  | 42466873  | ITGA2B    |
| ENSG00000006007 | 9.776749803 | 9.779529137 | protein_coding | 16 | 19513015  | 19533467  | GDE1      |
| ENSG00000006015 | 7.46813618  | 8.129000175 | protein_coding | 19 | 18699495  | 18703146  | C19orf60  |
| ENSG00000006016 | 1.960915222 | 1.353254395 | protein_coding | 19 | 18704037  | 18717660  | CRLF1     |
| ENSG00000006025 | 6.979904289 | 6.677762549 | protein_coding | 17 | 45884733  | 45899200  | OSBPL7    |
| ENSG00000006042 | 0.499066092 | 0           | protein_coding | 17 | 31254928  | 31268667  | TMEM98    |
| ENSG00000006047 | 7.22677265  | 6.387491945 | protein_coding | 17 | 7191571   | 7197876   | YBX2      |
| ENSG00000006062 | 8.307246212 | 7.373448694 | protein_coding | 17 | 43340488  | 43394414  | MAP3K14   |
| ENSG00000006075 | 1.799000381 | 1.353254395 | protein_coding | 17 | 34415602  | 34417515  | CCL3      |
| ENSG00000006114 | 8.150302734 | 8.401295742 | protein_coding | 17 | 35874900  | 35969488  | SYNRG     |
| ENSG00000006116 | 0.499066092 | 0           | protein_coding | 16 | 24266874  | 24374122  | CACNG3    |
| ENSG00000006118 | 11.28329831 | 11.69509293 | protein_coding | 11 | 60691935  | 60704631  | TMEM132A  |
| ENSG00000006125 | 11.91081554 | 11.38570126 | protein_coding | 17 | 33914282  | 34053434  | AP2B1     |
| ENSG00000006194 | 8.243750574 | 8.423679567 | protein_coding | 16 | 3313800   | 3341460   | ZNF263    |
| ENSG00000006210 | 10.60538231 | 10.62099642 | protein_coding | 16 | 57406370  | 57418960  | CX3CL1    |
| ENSG00000006282 | 9.016909338 | 9.515904068 | protein_coding | 17 | 48620419  | 48633213  | SPATA20   |
| ENSG00000006283 | 2.35979773  | 1.802319292 | protein_coding | 17 | 48638429  | 48704835  | CACNA1G   |
| ENSG00000006327 | 10.38944493 | 10.69431005 | protein_coding | 16 | 3070313   | 3072384   | TNFRSF12A |
| ENSG00000006432 | 9.189208632 | 8.141764426 | protein_coding | 14 | 71189243  | 71276251  | MAP3K9    |
| ENSG00000006451 | 9.194306789 | 9.535986486 | protein_coding | 7  | 39663082  | 39747723  | RALA      |

|                 |             |             |                  |    |           |                   |
|-----------------|-------------|-------------|------------------|----|-----------|-------------------|
| ENSG00000006453 | 9.3522601   | 8.222087975 | protein_coding   | 7  | 97920963  | 98030380          |
| ENSG00000006459 | 7.572060955 | 7.529716161 | protein_coding   | 7  | 139784546 | 139876835 JHDM1D  |
| ENSG00000006468 | 6.975172889 | 6.720932357 | protein_coding   | 7  | 13930853  | 14031050 ETV1     |
| ENSG00000006530 | 8.98901727  | 8.670461892 | protein_coding   | 7  | 141250989 | 141355044 AGK     |
| ENSG00000006534 | 10.11026574 | 9.6159211   | processed_transc | 11 | 67776048  | 67796744 ALDH3B1  |
| ENSG00000006555 | 5.848544806 | 2.652276565 | protein_coding   | 1  | 55245385  | 55266940 TTC22    |
| ENSG00000006576 | 8.225937332 | 8.301022059 | protein_coding   | 7  | 77428109  | 77586818 PHTF2    |
| ENSG00000006606 | 3.004694206 | 1.16600992  | protein_coding   | 7  | 75398851  | 75419214 CCL26    |
| ENSG00000006607 | 7.819120959 | 7.444711851 | protein_coding   | 2  | 242295658 | 242434256 FARP2   |
| ENSG00000006611 | 2.847891871 | 1.802319292 | protein_coding   | 11 | 17515442  | 17565963 USH1C    |
| ENSG00000006625 | 9.081068723 | 8.84060518  | protein_coding   | 7  | 30536237  | 30544460 GGCT     |
| ENSG00000006634 | 8.441937187 | 8.099860884 | protein_coding   | 7  | 87505531  | 87538856 DBF4     |
| ENSG00000006638 | 5.649112675 | 6.057793599 | protein_coding   | 19 | 3594504   | 3606831 TBXA2R    |
| ENSG00000006652 | 9.271590235 | 9.368945519 | protein_coding   | 7  | 112063023 | 112121072 IFRD1   |
| ENSG00000006695 | 8.815923273 | 8.973277306 | protein_coding   | 17 | 13972846  | 14111994 COX10    |
| ENSG00000006704 | 8.782461599 | 8.483815721 | protein_coding   | 7  | 73868120  | 74016931 GTF2IRD1 |
| ENSG00000006712 | 8.018542337 | 8.053329862 | protein_coding   | 19 | 39876275  | 39881757 PAF1     |
| ENSG00000006715 | 9.514316103 | 9.545023257 | protein_coding   | 7  | 38762563  | 38971994 VPS41    |
| ENSG00000006740 | 5.4452544   | 5.923798455 | protein_coding   | 17 | 12692829  | 12894960 ARHGAP44 |
| ENSG00000006744 | 10.98276711 | 11.44016012 | protein_coding   | 17 | 12894930  | 12921381 ELAC2    |
| ENSG00000006747 | 5.879259127 | 0.697730409 | protein_coding   | 7  | 12610203  | 12693228 SCIN     |
| ENSG00000006756 | 7.392081667 | 7.962719647 | protein_coding   | X  | 2822011   | 2847392 ARSD      |
| ENSG00000006757 | 7.281453427 | 7.664078611 | protein_coding   | X  | 7866288   | 7895780 PNPLA4    |
| ENSG00000006788 | 0.499066092 | 0.390640832 | protein_coding   | 17 | 10204183  | 10276322 MYH13    |
| ENSG00000006831 | 10.5732602  | 10.00540199 | protein_coding   | 12 | 1797740   | 1897844 ADIPOR2   |
| ENSG00000006837 | 2.928422289 | 3.993387124 | protein_coding   | 5  | 133541305 | 133706738 CDKL3   |
| ENSG00000007001 | 0           | 0.390640832 | protein_coding   | 2  | 158851691 | 158992478 UPP2    |
| ENSG00000007038 | 8.292108003 | 8.683615101 | protein_coding   | 16 | 2867164   | 2871270 PRSS21    |
| ENSG00000007047 | 7.572060955 | 7.210344614 | protein_coding   | 19 | 45754550  | 45808541 MARK4    |
| ENSG00000007062 | 0.499066092 | 0.390640832 | protein_coding   | 4  | 15964699  | 16086001 PROM1    |
| ENSG00000007080 | 10.76910987 | 11.13549418 | protein_coding   | 19 | 18043824  | 18054793 CCDC124  |
| ENSG00000007129 | 0.869158192 | 0           | protein_coding   | 19 | 42041702  | 42093197 CEACAM21 |
| ENSG00000007168 | 10.73032559 | 11.17095165 | protein_coding   | 17 | 2496923   | 2588909 PAFAH1B1  |
| ENSG00000007171 | 0.869158192 | 0           | protein_coding   | 17 | 26083792  | 26127555 NOS2     |
| ENSG00000007174 | 0.869158192 | 1.16600992  | protein_coding   | 17 | 11501748  | 11873485 DNAH9    |
| ENSG00000007202 | 11.59550853 | 11.29701405 | protein_coding   | 17 | 26941459  | 26972472 KIAA0100 |
| ENSG00000007237 | 2.471521042 | 3.411459265 | protein_coding   | 17 | 9813926   | 10101868 GAS7     |
| ENSG00000007255 | 6.592037289 | 6.601272494 | protein_coding   | 19 | 45666187  | 45681485 TRAPPC6A |
| ENSG00000007264 | 2.10647801  | 2.579085888 | protein_coding   | 19 | 3777968   | 3801810 MATK      |
| ENSG00000007306 | 0.869158192 | 0           | protein_coding   | 19 | 42177235  | 42192296 CEACAM7  |
| ENSG00000007314 | 5.141750194 | 3.570966319 | protein_coding   | 17 | 62015914  | 62050278 SCN4A    |
| ENSG00000007341 | 6.407685389 | 6.651226688 | protein_coding   | 1  | 113066140 | 113163447 ST7L    |
| ENSG00000007350 | 0           | 0.390640832 | protein_coding   | X  | 153524024 | 153558713 TKTL1   |
| ENSG00000007372 | 2.57521082  | 2.420525079 | protein_coding   | 11 | 31806340  | 31839509 PAX6     |
| ENSG00000007376 | 9.195324263 | 9.282254961 | protein_coding   | 16 | 834974    | 838397 RPUSD1     |
| ENSG00000007384 | 8.700271793 | 8.943515377 | protein_coding   | 16 | 108058    | 126354 RHBDF1     |
| ENSG00000007392 | 8.539709228 | 8.945336714 | protein_coding   | 16 | 238968    | 279462 LUC7L      |
| ENSG00000007402 | 4.026095388 | 3.493416095 | protein_coding   | 3  | 50400233  | 50541675 CACNA2D2 |
| ENSG00000007516 | 5.774228067 | 4.65855978  | protein_coding   | 16 | 1383602   | 1399439 BAIAP3    |
| ENSG00000007520 | 9.320904342 | 9.397831074 | protein_coding   | 16 | 1399241   | 1401912 C16orf42  |
| ENSG00000007541 | 9.548160668 | 9.917672197 | protein_coding   | 16 | 616995    | 634136 PIGQ       |
| ENSG00000007545 | 8.072698871 | 7.984140487 | protein_coding   | 16 | 1662326   | 1727909 CRAMP1L   |
| ENSG00000007866 | 8.70742151  | 8.861011175 | protein_coding   | 6  | 35441374  | 35464861 TEAD3    |
| ENSG00000007923 | 9.029515185 | 9.059047571 | protein_coding   | 1  | 6694228   | 6761984 DNAJC11   |
| ENSG00000007944 | 7.773523328 | 7.688207601 | protein_coding   | 6  | 16129356  | 16148479 MYLIP    |
| ENSG00000007952 | 2.10647801  | 1.518964905 | protein_coding   | X  | 100098313 | 100129334 NOX1    |
| ENSG00000007968 | 7.654275977 | 7.711939664 | protein_coding   | 1  | 23832922  | 23857712 E2F2     |
| ENSG00000008018 | 10.54320643 | 10.64808893 | protein_coding   | 6  | 170844205 | 170862429 PSMB1   |
| ENSG00000008056 | 3.274897671 | 4.489113623 | protein_coding   | X  | 47431303  | 47479252 SYN1     |
| ENSG00000008083 | 9.30119149  | 8.780659733 | protein_coding   | 6  | 15245734  | 15522252 JARID2   |
| ENSG00000008086 | 3.871730003 | 4.468996429 | protein_coding   | X  | 18443703  | 18671749 CDKL5    |
| ENSG00000008118 | 1.960915222 | 1.16600992  | protein_coding   | 1  | 209757062 | 209787283 CAMK1G  |
| ENSG00000008128 | 8.241782151 | 8.003500716 | protein_coding   | 1  | 1634169   | 1655966 CDK11A    |

|                 |             |             |                |    |           |           |          |
|-----------------|-------------|-------------|----------------|----|-----------|-----------|----------|
| ENSG00000008130 | 9.922115648 | 10.03777287 | protein_coding | 1  | 1682671   | 1711896   | NADK     |
| ENSG00000008226 | 2.238690726 | 1.667587519 | protein_coding | 3  | 38080696  | 38165516  | DLEC1    |
| ENSG00000008256 | 9.331123617 | 8.511125832 | protein_coding | 7  | 6201407   | 6312275   | CYTH3    |
| ENSG00000008277 | 1.799000381 | 1.518964905 | protein_coding | 7  | 87563458  | 87832204  | ADAM22   |
| ENSG00000008282 | 9.881603942 | 9.521408873 | protein_coding | 7  | 105730949 | 105753022 | SYPL1    |
| ENSG00000008283 | 10.47697524 | 9.761034214 | protein_coding | 17 | 61509668  | 61523722  | CYB561   |
| ENSG00000008294 | 10.40095672 | 10.18146283 | protein_coding | 17 | 49039535  | 49198226  | SPAG9    |
| ENSG00000008300 | 8.732871027 | 8.549948921 | protein_coding | 3  | 48673902  | 48700348  | CELSR3   |
| ENSG00000008311 | 6.244259325 | 6.811590016 | protein_coding | 7  | 121715701 | 121784334 | AASS     |
| ENSG00000008323 | 5.472368541 | 2.721932731 | protein_coding | 12 | 6419602   | 6437672   | PLEKHG6  |
| ENSG00000008324 | 6.335686705 | 6.642271819 | protein_coding | 3  | 42623332  | 42636606  | SS18L2   |
| ENSG00000008382 | 7.530740159 | 6.847095496 | protein_coding | 19 | 4343524   | 4360082   | MPND     |
| ENSG00000008394 | 11.02515609 | 10.64416949 | protein_coding | 12 | 16500076  | 16762193  | MGST1    |
| ENSG00000008405 | 7.896231123 | 7.204272857 | protein_coding | 12 | 107385142 | 107487607 | CRY1     |
| ENSG00000008438 | 3.004694206 | 1.802319292 | protein_coding | 19 | 46522415  | 46526556  | PGLYRP1  |
| ENSG00000008441 | 12.27220068 | 12.12937721 | protein_coding | 19 | 13106584  | 13209610  | NFIX     |
| ENSG00000008513 | 9.370391259 | 8.578395649 | protein_coding | 8  | 134467091 | 134584183 | ST3GAL1  |
| ENSG00000008516 | 5.763291843 | 6.465715653 | protein_coding | 16 | 3096682   | 3110703   | MMP25    |
| ENSG00000008517 | 10.6854095  | 11.90805612 | protein_coding | 16 | 3115298   | 3131908   | IL32     |
| ENSG00000008710 | 10.19815945 | 10.44293712 | protein_coding | 16 | 2138711   | 2185899   | PKD1     |
| ENSG00000008735 | 7.46813618  | 5.32851069  | protein_coding | 22 | 51039114  | 51052409  | MAPK8IP2 |
| ENSG00000008838 | 10.09126063 | 9.89993707  | protein_coding | 17 | 38175350  | 38210661  | MED24    |
| ENSG00000008853 | 7.657232808 | 7.318294738 | protein_coding | 8  | 22844930  | 22877712  | RHOBTB2  |
| ENSG00000008869 | 8.027710784 | 8.151264044 | protein_coding | 2  | 37195526  | 37311485  | HEATR5B  |
| ENSG00000008952 | 9.632461462 | 9.568257332 | protein_coding | 3  | 169684423 | 169716161 | SEC62    |
| ENSG00000008988 | 11.22943395 | 11.75823332 | protein_coding | 8  | 56979854  | 56987099  | RPS20    |
| ENSG00000009307 | 11.88361595 | 11.93374232 | protein_coding | 1  | 115259534 | 115301297 | CSDE1    |
| ENSG00000009335 | 10.80254523 | 10.39542958 | protein_coding | 7  | 156931607 | 157062066 | UBE3C    |
| ENSG00000009413 | 8.059349131 | 8.347216179 | protein_coding | 6  | 111620234 | 111804918 | REV3L    |
| ENSG00000009694 | 0           | 0.697730409 | protein_coding | X  | 123509753 | 124097666 | ODZ1     |
| ENSG00000009724 | 4.19837882  | 3.935919592 | protein_coding | 1  | 11086580  | 11107290  | MASP2    |
| ENSG00000009780 | 5.672682881 | 5.339632724 | protein_coding | 1  | 28052490  | 28088475  | FAM76A   |
| ENSG00000009790 | 4.821592551 | 4.566889334 | protein_coding | 1  | 209929377 | 209955668 | TRAF3IP3 |
| ENSG00000009830 | 9.648894781 | 10.10123101 | protein_coding | 14 | 77741299  | 77787227  | POMT2    |
| ENSG00000009844 | 8.797280438 | 8.81990641  | protein_coding | 6  | 142468367 | 142542085 | VTA1     |
| ENSG00000009950 | 6.320845526 | 3.411459265 | protein_coding | 7  | 73007524  | 73038873  | MLXIPL   |
| ENSG00000009954 | 11.15764605 | 10.73119995 | protein_coding | 7  | 72854728  | 72936608  | BAZ1B    |
| ENSG00000010017 | 8.809292739 | 9.068270303 | protein_coding | 6  | 13621730  | 13711953  | RANBP9   |
| ENSG00000010030 | 4.981125677 | 5.22435463  | protein_coding | 6  | 36322419  | 36356164  | ETV7     |
| ENSG00000010072 | 7.633406721 | 7.694718794 | protein_coding | 1  | 231472850 | 231490769 | C1orf124 |
| ENSG00000010165 | 8.8704485   | 9.190020311 | protein_coding | 1  | 171750788 | 171783163 | METTL13  |
| ENSG00000010219 | 6.26766507  | 6.835357159 | protein_coding | 12 | 4671370   | 4723325   | DYRK4    |
| ENSG00000010244 | 10.77354482 | 10.64836849 | protein_coding | 17 | 30677150  | 30714780  | ZNF207   |
| ENSG00000010256 | 11.10257995 | 11.09402129 | protein_coding | 3  | 48636435  | 48648409  | UQCRC1   |
| ENSG00000010270 | 8.299696963 | 8.17939326  | protein_coding | 7  | 38217824  | 38270272  | STARD3NL |
| ENSG00000010278 | 9.70569484  | 9.362144241 | protein_coding | 12 | 6308881   | 6347427   | CD9      |
| ENSG00000010282 | 0.499066092 | 0.390640832 | protein_coding | 3  | 42734155  | 42744319  | HHATL    |
| ENSG00000010292 | 11.74213696 | 11.08702611 | protein_coding | 12 | 6602522   | 6641121   | NCAPD2   |
| ENSG00000010295 | 7.461385447 | 7.515074729 | protein_coding | 12 | 6647541   | 6665239   | IFFO1    |
| ENSG00000010310 | 5.485736881 | 4.274079748 | protein_coding | 19 | 46171502  | 46185704  | GIPR     |
| ENSG00000010318 | 5.472368541 | 5.840125386 | protein_coding | 3  | 52443510  | 52457657  | PHF7     |
| ENSG00000010319 | 2.471521042 | 2.242360793 | protein_coding | 3  | 52467069  | 52479101  | SEMA3G   |
| ENSG00000010322 | 9.151960225 | 9.305130221 | protein_coding | 3  | 52489134  | 52527087  | NISCH    |
| ENSG00000010327 | 0.499066092 | 0.950786998 | protein_coding | 3  | 52529354  | 52558511  | STAB1    |
| ENSG00000010361 | 5.472368541 | 5.674321415 | protein_coding | 19 | 50310126  | 50320633  | FUZ      |
| ENSG00000010379 | 0.499066092 | 1.667587519 | protein_coding | 12 | 329789    | 372039    | SLC6A13  |
| ENSG00000010404 | 9.536164262 | 9.661506506 | protein_coding | X  | 148558521 | 148615470 | IDS      |
| ENSG00000010438 | 6.0776925   | 2.971122874 | protein_coding | 9  | 33750515  | 33799230  | PRSS3    |
| ENSG00000010539 | 7.478203418 | 7.683850422 | protein_coding | 16 | 3272325   | 3285456   | ZNF200   |
| ENSG00000010610 | 0.869158192 | 1.518964905 | protein_coding | 12 | 6896024   | 6929974   | CD4      |
| ENSG00000010626 | 6.129712275 | 5.901455548 | protein_coding | 12 | 6982733   | 7023407   | LRRC23   |
| ENSG00000010671 | 0.869158192 | 1.16600992  | protein_coding | X  | 100604435 | 100641183 | BTK      |
| ENSG00000010704 | 7.543580762 | 7.167295693 | protein_coding | 6  | 26087509  | 26098571  | HFE      |

|                 |             |             |                 |    |           |           |          |
|-----------------|-------------|-------------|-----------------|----|-----------|-----------|----------|
| ENSG00000010803 | 8.549290825 | 8.630267069 | protein_coding  | 1  | 41492872  | 41707826  | SCMH1    |
| ENSG00000010810 | 6.252103507 | 8.117738058 | protein_coding  | 6  | 111981535 | 112194655 | FYN      |
| ENSG00000010818 | 8.890689734 | 8.93895195  | protein_coding  | 6  | 143072604 | 143266338 | HIVEP2   |
| ENSG00000010932 | 0.499066092 | 1.16600992  | protein_coding  | 1  | 171217638 | 171255117 | FMO1     |
| ENSG00000011007 | 9.375786469 | 9.429406685 | protein_coding  | 1  | 24069645  | 24088549  | TCEB3    |
| ENSG00000011009 | 9.388297379 | 9.20378064  | protein_coding  | 1  | 24117460  | 24122029  | LYPLA2   |
| ENSG00000011021 | 8.032273249 | 7.741590246 | protein_coding  | 1  | 11866207  | 11903201  | CLCN6    |
| ENSG00000011028 | 8.408986408 | 8.190185975 | protein_coding  | 17 | 60704762  | 60770956  | MRC2     |
| ENSG00000011052 | 7.416718478 | 7.439552137 | protein_coding  | 17 | 49230920  | 49249108  | NME2     |
| ENSG00000011083 | 0.869158192 | 0.390640832 | protein_coding  | 5  | 149569520 | 149602351 | SLC6A7   |
| ENSG00000011105 | 9.192269688 | 8.531880603 | protein_coding  | 12 | 3186521   | 3395730   | TSPAN9   |
| ENSG00000011114 | 9.0577617   | 8.398639372 | protein_coding  | 14 | 93703896  | 93799438  | BTBD7    |
| ENSG00000011132 | 8.646233023 | 9.112709611 | protein_coding  | 19 | 3750771   | 3761673   | APBA3    |
| ENSG00000011143 | 7.709444959 | 7.83885796  | protein_coding  | 17 | 56282799  | 56296966  | MKS1     |
| ENSG00000011198 | 7.292905885 | 7.929979971 | protein_coding  | 3  | 43731605  | 43775863  | ABHD5    |
| ENSG00000011201 | 1.16343121  | 1.16600992  | protein_coding  | X  | 8496915   | 8700227   | KAL1     |
| ENSG00000011243 | 9.41997878  | 9.353254373 | protein_coding  | 19 | 15490859  | 15529833  | AKAP8L   |
| ENSG00000011258 | 7.666067113 | 7.728957399 | protein_coding  | 17 | 49254786  | 49337524  | MBTD1    |
| ENSG00000011260 | 8.695964893 | 8.628000846 | protein_coding  | 17 | 49337889  | 49375297  | UTP18    |
| ENSG00000011275 | 10.16062356 | 10.08397376 | protein_coding  | 7  | 5659678   | 5821370   | RNF216   |
| ENSG00000011295 | 8.663981856 | 9.286571792 | protein_coding  | 17 | 15902782  | 15948336  | TTC19    |
| ENSG00000011304 | 12.54148129 | 12.35046418 | protein_coding  | 19 | 797392    | 812327    | PTBP1    |
| ENSG00000011332 | 5.472368541 | 5.317302248 | protein_coding  | 19 | 38701646  | 38720354  | DPF1     |
| ENSG00000011347 | 8.267164507 | 6.480864016 | protein_coding  | 11 | 61282785  | 61348620  | SYT7     |
| ENSG00000011376 | 8.749591335 | 8.457255683 | protein_coding  | 3  | 45429998  | 45590913  | LARS2    |
| ENSG00000011405 | 9.801015254 | 10.0097603  | protein_coding  | 11 | 17099277  | 17229530  | PIK3C2A  |
| ENSG00000011422 | 8.986668406 | 8.398639372 | protein_coding  | 19 | 44150271  | 44174502  | PLAUR    |
| ENSG00000011426 | 11.80147326 | 11.84396407 | protein_coding  | 7  | 36429415  | 36493400  | ANLN     |
| ENSG00000011451 | 10.76842635 | 10.8620608  | protein_coding  | 19 | 15532319  | 15560762  | WIZ      |
| ENSG00000011454 | 9.076658223 | 9.00068704  | protein_coding  | 9  | 125703112 | 125867145 | RABGAP1  |
| ENSG00000011465 | 0           | 0.390640832 | protein_coding  | 12 | 91539025  | 91576900  | DCN      |
| ENSG00000011478 | 8.129161475 | 8.602834575 | protein_coding  | 19 | 46195741  | 46207240  | QPCTL    |
| ENSG00000011485 | 9.576551475 | 9.752217392 | protein_coding  | 19 | 46850251  | 46896238  | PPP5C    |
| ENSG00000011523 | 7.726437377 | 7.65742733  | protein_coding  | 2  | 65283500  | 65314138  | CEP68    |
| ENSG00000011566 | 8.261346552 | 8.362291274 | protein_coding  | 2  | 39476407  | 39664453  | MAP4K3   |
| ENSG00000011590 | 1.960915222 | 2.334191469 | protein_coding  | 19 | 36203830  | 36207940  | ZBTB32   |
| ENSG00000011638 | 8.659565077 | 8.53672099  | protein_coding  | 16 | 21169698  | 21191937  | TMEM159  |
| ENSG00000012048 | 9.008829705 | 8.920552509 | protein_coding  | 17 | 41196312  | 41322290  | BRCA1    |
| ENSG00000012061 | 6.872051157 | 7.373448694 | protein_coding  | 19 | 45910591  | 45982086  | ERCC1    |
| ENSG00000012124 | 1.960915222 | 2.144285137 | protein_coding  | 19 | 35820072  | 35838258  | CD22     |
| ENSG00000012171 | 7.530740159 | 8.132201841 | polymorphic_pse | 3  | 50304990  | 50314977  | SEMA3B   |
| ENSG00000012174 | 8.795939543 | 9.243551304 | protein_coding  | X  | 21857754  | 21903542  | MBTPS2   |
| ENSG00000012211 | 8.965354743 | 8.820898829 | protein_coding  | X  | 49031151  | 49042845  | PRICKLE3 |
| ENSG00000012223 | 5.40360309  | 6.99159092  | protein_coding  | 3  | 46477136  | 46526724  | LTF      |
| ENSG00000012232 | 9.77334709  | 9.379087693 | protein_coding  | 8  | 28457986  | 28613116  | EXTL3    |
| ENSG00000012660 | 10.68396043 | 10.36445494 | protein_coding  | 6  | 53132196  | 53213947  | ELOVL5   |
| ENSG00000012779 | 0.869158192 | 1.16600992  | protein_coding  | 10 | 45869661  | 45941561  | ALOX5    |
| ENSG00000012822 | 8.731468881 | 9.471724717 | protein_coding  | 12 | 54104902  | 54121529  | CALCOCO1 |
| ENSG00000012963 | 9.013452178 | 8.975061478 | protein_coding  | 14 | 93673401  | 93695561  | UBR7     |
| ENSG00000012983 | 8.954578658 | 9.124010896 | protein_coding  | 14 | 50885219  | 51027844  | MAP4K5   |
| ENSG00000013016 | 1.960915222 | 0.697730409 | protein_coding  | 2  | 31456880  | 31492313  | EHD3     |
| ENSG00000013275 | 9.623418305 | 9.790209352 | protein_coding  | 19 | 40477073  | 40487351  | PSMC4    |
| ENSG00000013288 | 8.623735441 | 8.929781562 | protein_coding  | 4  | 6576902   | 6625089   | MAN2B2   |
| ENSG00000013297 | 8.908170811 | 7.989446368 | protein_coding  | 3  | 170136653 | 170578169 | CLDN11   |
| ENSG00000013306 | 11.10610075 | 10.69241345 | protein_coding  | 17 | 42396993  | 42402238  | SLC25A39 |
| ENSG00000013364 | 11.79896536 | 11.61268024 | protein_coding  | 16 | 29828560  | 29859355  | MVP      |
| ENSG00000013374 | 9.072234198 | 9.012896966 | protein_coding  | 7  | 151038785 | 151075535 | NUB1     |
| ENSG00000013375 | 9.24628631  | 9.575331647 | protein_coding  | 6  | 83870869  | 83903655  | PGM3     |
| ENSG00000013392 | 5.485736881 | 6.136428444 | protein_coding  | 6  | 83903098  | 83906382  | RWDD2A   |
| ENSG00000013441 | 8.077121473 | 8.220584723 | protein_coding  | 2  | 201717732 | 201729467 | CLK1     |
| ENSG00000013503 | 7.609180529 | 7.321103092 | protein_coding  | 12 | 106751436 | 106903976 | POLR3B   |
| ENSG00000013523 | 9.004192374 | 9.132828786 | protein_coding  | 14 | 77253588  | 77292589  | ANGEL1   |
| ENSG00000013561 | 8.593182305 | 8.788797839 | protein_coding  | 5  | 141337893 | 141369856 | RNF14    |

|                 |             |             |                |    |           |           |          |
|-----------------|-------------|-------------|----------------|----|-----------|-----------|----------|
| ENSG00000013563 | 7.007971391 | 6.525377513 | protein_coding | X  | 153629579 | 153640449 | DNASE1L1 |
| ENSG00000013573 | 9.338510612 | 9.397831074 | protein_coding | 12 | 31226779  | 31257725  | DDX11    |
| ENSG00000013583 | 8.398422578 | 7.922602475 | protein_coding | 12 | 13127798  | 13153207  | HEBP1    |
| ENSG00000013588 | 11.83106916 | 10.82073834 | protein_coding | 12 | 13043716  | 13070871  | GPRC5A   |
| ENSG00000013619 | 7.348842929 | 7.167295693 | protein_coding | X  | 149529689 | 149682448 | MAMLD1   |
| ENSG00000013725 | 2.10647801  | 1.518964905 | protein_coding | 11 | 60739115  | 60787849  | CD6      |
| ENSG00000013810 | 10.06756346 | 9.874353473 | protein_coding | 4  | 1723227   | 1746898   | TACC3    |
| ENSG00000014123 | 7.770795701 | 8.188649093 | protein_coding | 6  | 96969471  | 97003152  | UFL1     |
| ENSG00000014138 | 9.373990307 | 9.789702559 | protein_coding | 11 | 65029233  | 65073060  | POLA2    |
| ENSG00000014164 | 8.655134734 | 8.165397208 | protein_coding | 8  | 144519825 | 144623623 | ZC3H3    |
| ENSG00000014216 | 11.37213372 | 10.55214769 | protein_coding | 11 | 64948037  | 64979477  | CAPN1    |
| ENSG00000014257 | 5.054730169 | 1.802319292 | protein_coding | 3  | 132036211 | 132087142 | ACPP     |
| ENSG00000014641 | 9.392739397 | 9.851710903 | protein_coding | 2  | 63815743  | 63834331  | MDH1     |
| ENSG00000014824 | 9.520824196 | 9.737577069 | protein_coding | 4  | 41992489  | 42089551  | SLC30A9  |
| ENSG00000014914 | 7.194570056 | 7.84667518  | protein_coding | 1  | 149900543 | 149908791 | MTMR11   |
| ENSG00000014919 | 9.195324263 | 9.240587696 | protein_coding | 10 | 101471601 | 101491866 | COX15    |
| ENSG00000015133 | 9.260938843 | 7.198175438 | protein_coding | 14 | 91737667  | 91884188  | CCDC88C  |
| ENSG00000015153 | 7.437505974 | 7.852510423 | protein_coding | 12 | 42550906  | 42632151  | YAF2     |
| ENSG00000015171 | 8.47750173  | 8.508664347 | protein_coding | 10 | 180405    | 300577    | ZMYND11  |
| ENSG00000015285 | 3.78787645  | 3.453019579 | protein_coding | X  | 48534985  | 48549818  | WAS      |
| ENSG00000015413 | 0.499066092 | 0.390640832 | protein_coding | 16 | 89679716  | 89704839  | DPEP1    |
| ENSG00000015475 | 9.450127191 | 9.440426033 | protein_coding | 22 | 18216906  | 18257536  | BID      |
| ENSG00000015479 | 11.41774464 | 11.41852429 | protein_coding | 5  | 138609441 | 138667360 | MATR3    |
| ENSG00000015520 | 2.35979773  | 2.420525079 | protein_coding | 7  | 44552134  | 44580914  | NPC1L1   |
| ENSG00000015532 | 8.839544001 | 8.486319932 | protein_coding | 17 | 48423453  | 48440499  | XYLT2    |
| ENSG00000015568 | 2.57521082  | 2.334191469 | protein_coding | 2  | 110550335 | 110615272 | RGPD5    |
| ENSG00000015592 | 0           | 0.697730409 | protein_coding | 8  | 27092840  | 27115937  | STMN4    |
| ENSG00000015676 | 10.54639963 | 10.22297151 | protein_coding | 7  | 44421969  | 44530479  | NUDCD3   |
| ENSG00000016391 | 5.036678094 | 3.368666104 | protein_coding | 3  | 53850387  | 53880417  | CHDH     |
| ENSG00000016402 | 0.869158192 | 0.390640832 | protein_coding | 6  | 137321108 | 137366298 | IL20RA   |
| ENSG00000016864 | 8.552470601 | 8.902852973 | protein_coding | 3  | 52728505  | 52740048  | GLT8D1   |
| ENSG00000017260 | 10.52146546 | 10.55632491 | protein_coding | 3  | 130569439 | 130735556 | ATP2C1   |
| ENSG00000017373 | 6.0776925   | 5.9163892   | protein_coding | 17 | 36686259  | 36762183  | SRCIN1   |
| ENSG00000017427 | 0.499066092 | 0.390640832 | protein_coding | 12 | 102789645 | 102874423 | IGF1     |
| ENSG00000017483 | 3.211941663 | 3.748356452 | protein_coding | X  | 48316920  | 48328644  | SLC38A5  |
| ENSG00000017621 | 4.6658819   | 4.917990497 | protein_coding | X  | 49019061  | 49024822  | MAGIX    |
| ENSG00000017797 | 10.20625762 | 9.85268169  | protein_coding | 18 | 9475007   | 9538112   | RALBP1   |
| ENSG00000018189 | 7.206730419 | 7.077141316 | protein_coding | 4  | 71569921  | 71673032  | RUFY3    |
| ENSG00000018236 | 6.489593565 | 5.32851069  | protein_coding | 12 | 41086244  | 41465772  | CNTN1    |
| ENSG00000018280 | 2.847891871 | 2.912743273 | protein_coding | 2  | 219246752 | 219261617 | SLC11A1  |
| ENSG00000018408 | 9.691342543 | 9.31220499  | protein_coding | 3  | 149235022 | 149454501 | WWTR1    |
| ENSG00000018510 | 9.933745809 | 9.568257332 | protein_coding | 2  | 178257372 | 178408564 | AGPS     |
| ENSG00000018610 | 7.993024472 | 8.327799018 | protein_coding | X  | 118672112 | 118699397 | CXorf56  |
| ENSG00000018625 | 1.407729925 | 0.390640832 | protein_coding | 1  | 160085549 | 160113381 | ATP1A2   |
| ENSG00000018699 | 8.844740944 | 9.052302903 | protein_coding | 2  | 32853099  | 33046118  | TTC27    |
| ENSG00000018869 | 5.695874189 | 6.246885341 | protein_coding | 19 | 56894648  | 56904889  | ZNF582   |
| ENSG00000019102 | 1.960915222 | 0.390640832 | protein_coding | 11 | 124617368 | 124622134 | VSIG2    |
| ENSG00000019144 | 9.697818752 | 9.506065582 | protein_coding | 11 | 118477155 | 118528741 | PHLDB1   |
| ENSG00000019169 | 1.960915222 | 1.667587519 | protein_coding | 2  | 119699742 | 119752236 | MARCO    |
| ENSG00000019186 | 5.763291843 | 2.334191469 | protein_coding | 20 | 52769988  | 52790512  | CYP24A1  |
| ENSG00000019485 | 4.517578978 | 4.342020395 | protein_coding | 11 | 45115564  | 45247734  | PRDM11   |
| ENSG00000019505 | 0.499066092 | 0           | protein_coding | 11 | 45261852  | 45307870  | SYT13    |
| ENSG00000019549 | 7.19863491  | 6.044260771 | protein_coding | 8  | 49830249  | 49834299  | SNAI2    |
| ENSG00000019582 | 8.485841807 | 4.761389014 | protein_coding | 5  | 149781200 | 149792492 | CD74     |
| ENSG00000019995 | 8.97959878  | 9.227175607 | protein_coding | 10 | 126630692 | 126676758 | ZRANB1   |
| ENSG00000020129 | 9.417365074 | 9.080752488 | protein_coding | 1  | 36023074  | 36032875  | NCDN     |
| ENSG00000020181 | 5.223818625 | 4.489113623 | protein_coding | 8  | 37641709  | 37702414  | GPR124   |
| ENSG00000020219 | 0           | 0.390640832 | pseudogene     | 7  | 152142562 | 152144235 | CCT8L1P  |
| ENSG00000020256 | 8.541310587 | 8.472492669 | protein_coding | 20 | 50668202  | 50820847  | ZFP64    |
| ENSG00000020426 | 7.990682129 | 8.196317182 | protein_coding | 14 | 61201460  | 61436671  | MNAT1    |
| ENSG00000020577 | 9.993458163 | 10.76639755 | protein_coding | 14 | 55033815  | 55260033  | SAMD4A   |
| ENSG00000020633 | 1.407729925 | 1.353254395 | protein_coding | 1  | 25226002  | 25291612  | RUNX3    |
| ENSG00000020922 | 8.640267888 | 9.139208113 | protein_coding | 11 | 94152895  | 94227074  | MRE11A   |

|                 |             |             |                |    |           |           |          |
|-----------------|-------------|-------------|----------------|----|-----------|-----------|----------|
| ENSG00000021300 | 4.999881834 | 5.57429348  | protein_coding | 11 | 73357223  | 73373864  | PLEKHB1  |
| ENSG00000021355 | 9.431250437 | 8.565427152 | protein_coding | 6  | 2832566   | 2842240   | SERPINB1 |
| ENSG00000021461 | 0           | 0.390640832 | protein_coding | 7  | 99425636  | 99463718  | CYP3A43  |
| ENSG00000021488 | 1.16343121  | 1.16600992  | protein_coding | 19 | 33321421  | 33360683  | SLC7A9   |
| ENSG00000021574 | 7.413224588 | 7.933654619 | protein_coding | 2  | 32288680  | 32382706  | PSTAS1   |
| ENSG00000021645 | 0           | 2.144285137 | protein_coding | 14 | 78708734  | 80330762  | NRXN3    |
| ENSG00000021762 | 8.177331204 | 7.890820294 | protein_coding | 11 | 3108346   | 3187969   | OSBPL5   |
| ENSG00000021776 | 9.221529789 | 8.861975727 | protein_coding | 15 | 35147732  | 35262040  | AQR      |
| ENSG00000021826 | 6.733233509 | 8.124184315 | protein_coding | 2  | 211342406 | 211543831 | CPS1     |
| ENSG00000022267 | 8.344411036 | 7.728957399 | protein_coding | X  | 135229559 | 135293518 | FHL1     |
| ENSG00000022277 | 9.71423818  | 9.745961151 | protein_coding | 20 | 55043647  | 55093943  | C20orf43 |
| ENSG00000022556 | 2.471521042 | 1.925536307 | protein_coding | 19 | 55476438  | 55512510  | NLRP2    |
| ENSG00000022567 | 6.535310252 | 6.343971006 | protein_coding | 8  | 142217265 | 142318404 | SLC45A4  |
| ENSG00000022840 | 10.46900434 | 10.03178518 | protein_coding | 12 | 120971283 | 121015397 | RNF10    |
| ENSG00000022976 | 8.092494681 | 7.365308824 | protein_coding | 14 | 102783714 | 102809044 | ZNF839   |
| ENSG00000023041 | 8.825155121 | 9.189251987 | protein_coding | 10 | 114190058 | 114206672 | ZDHHC6   |
| ENSG00000023171 | 3.871730003 | 3.183544561 | protein_coding | 11 | 123396344 | 123498482 | GRAMD1B  |
| ENSG00000023191 | 10.82835312 | 10.89518266 | protein_coding | 11 | 494512    | 507300    | RNH1     |
| ENSG00000023228 | 10.13062028 | 9.940680592 | protein_coding | 2  | 206986149 | 207024327 | NDUFS1   |
| ENSG00000023287 | 9.282163564 | 9.824260193 | protein_coding | 8  | 53535016  | 53658403  | RB1CC1   |
| ENSG00000023318 | 9.188186835 | 9.564114571 | protein_coding | 9  | 102741461 | 102861322 | ERP44    |
| ENSG00000023330 | 9.489645889 | 9.576507334 | protein_coding | 3  | 52232102  | 52248343  | ALAS1    |
| ENSG00000023445 | 10.57443379 | 11.09278931 | protein_coding | 11 | 102188215 | 102210134 | BIRC3    |
| ENSG00000023516 | 8.878072281 | 8.660517685 | protein_coding | 13 | 42846289  | 42897396  | AKAP11   |
| ENSG00000023572 | 6.244259325 | 7.073814954 | protein_coding | 1  | 193065598 | 193075244 | GLRX2    |
| ENSG00000023608 | 7.813830732 | 8.060069742 | protein_coding | 14 | 62229075  | 62263146  | SNAPC1   |
| ENSG00000023697 | 8.382430368 | 8.301022059 | protein_coding | 12 | 16064106  | 16190220  | DERA     |
| ENSG00000023734 | 10.84951254 | 10.6393958  | protein_coding | 12 | 16035325  | 16056412  | STRAP    |
| ENSG00000023839 | 5.223818625 | 5.072639111 | protein_coding | 10 | 101542489 | 101611949 | ABCC2    |
| ENSG00000023892 | 8.137655191 | 7.41347308  | protein_coding | 6  | 35265595  | 35289548  | DEF6     |
| ENSG00000023902 | 6.970425921 | 7.737391576 | protein_coding | 1  | 150121373 | 150132260 | PLEKHO1  |
| ENSG00000023909 | 8.227927477 | 7.549009758 | protein_coding | 1  | 94350761  | 94374966  | GCLM     |
| ENSG00000024048 | 8.922987828 | 9.23613084  | protein_coding | 6  | 42531800  | 42661242  | UBR2     |
| ENSG00000024422 | 10.68758037 | 10.4179039  | protein_coding | 19 | 48216601  | 48246390  | EHD2     |
| ENSG00000024526 | 8.249639777 | 8.512355001 | protein_coding | 1  | 68939835  | 68962904  | DEPDC1   |
| ENSG00000024862 | 6.449220685 | 6.742042315 | protein_coding | 6  | 139094657 | 139114456 | CCDC28A  |
| ENSG00000025039 | 3.502389126 | 4.888000647 | protein_coding | 6  | 90074355  | 90121989  | RRAGD    |
| ENSG00000025156 | 6.956090577 | 7.201227369 | protein_coding | 6  | 122720691 | 122754264 | HSF2     |
| ENSG00000025293 | 9.435562348 | 9.362144241 | protein_coding | 20 | 34359896  | 34538303  | PHF20    |
| ENSG00000025423 | 5.795854912 | 5.832272499 | protein_coding | 12 | 57145945  | 57181574  | HSD17B6  |
| ENSG00000025434 | 7.706593329 | 7.797107849 | protein_coding | 11 | 47269851  | 47290396  | NR1H3    |
| ENSG00000025708 | 9.955528053 | 9.761034214 | protein_coding | 22 | 50964181  | 50968485  | TYMP     |
| ENSG00000025770 | 9.575770339 | 9.578855838 | protein_coding | 22 | 50946645  | 50963063  | NCAPH2   |
| ENSG00000025772 | 9.865075275 | 9.89664616  | protein_coding | 20 | 43570771  | 43589127  | TOMM34   |
| ENSG00000025796 | 9.849001727 | 9.940224002 | protein_coding | 6  | 108188960 | 108279482 | SEC63    |
| ENSG00000025800 | 9.766517491 | 9.472356449 | protein_coding | 1  | 32573639  | 32642169  | KPNA6    |
| ENSG00000026025 | 14.36107066 | 14.03041213 | protein_coding | 10 | 17270258  | 17279592  | VIM      |
| ENSG00000026036 | 6.560798025 | 7.026422172 | protein_coding | 20 | 62290653  | 62330037  | RTEL1    |
| ENSG00000026103 | 6.86695184  | 6.535085617 | protein_coding | 10 | 90729553  | 90775542  | FAS      |
| ENSG00000026297 | 6.640654398 | 7.164171052 | protein_coding | 6  | 167342992 | 167370679 | RNASET2  |
| ENSG00000026508 | 12.97388146 | 13.12193712 | protein_coding | 11 | 35160417  | 35253949  | CD44     |
| ENSG00000026559 | 2.10647801  | 3.027231696 | protein_coding | 20 | 49620193  | 49639666  | KCNGB1   |
| ENSG00000026652 | 7.800519667 | 7.672899552 | protein_coding | 6  | 161551011 | 161695093 | AGPAT4   |
| ENSG00000026751 | 0.869158192 | 0.950786998 | protein_coding | 1  | 160709037 | 160724611 | SLAMF7   |
| ENSG00000026950 | 8.78516728  | 8.948064416 | protein_coding | 6  | 26402465  | 26415444  | BTN3A1   |
| ENSG00000027001 | 8.385999544 | 8.312357201 | protein_coding | 13 | 24304328  | 24463558  | MIPEP    |
| ENSG00000027075 | 6.435508026 | 2.912743273 | protein_coding | 14 | 61654277  | 62017694  | PRKCH    |
| ENSG00000027644 | 0.869158192 | 0.950786998 | protein_coding | 1  | 156809855 | 156828810 | INSRR    |
| ENSG00000027697 | 10.20170799 | 10.54495849 | protein_coding | 6  | 137518621 | 137540586 | IFNGR1   |
| ENSG00000027847 | 7.928406768 | 8.391976969 | protein_coding | 5  | 177027101 | 177037348 | B4GALT7  |
| ENSG00000027869 | 7.084651883 | 5.674321415 | protein_coding | 1  | 156776035 | 156786654 | SH2D2A   |
| ENSG00000028116 | 7.341508784 | 7.470237199 | protein_coding | 2  | 58134786  | 58387055  | VRK2     |
| ENSG00000028137 | 6.305850085 | 4.468996429 | protein_coding | 1  | 12227060  | 12269285  | TNFRSF1B |

|                 |             |             |                  |    |           |           |           |
|-----------------|-------------|-------------|------------------|----|-----------|-----------|-----------|
| ENSG00000028203 | 8.961771651 | 9.207579776 | protein_coding   | 12 | 95611522  | 95696566  | VEZT      |
| ENSG00000028277 | 4.322773689 | 4.888000647 | protein_coding   | 19 | 42592650  | 42700737  | POU2F2    |
| ENSG00000028310 | 9.645176339 | 9.162882465 | protein_coding   | 5  | 850406    | 892939    | BRD9      |
| ENSG00000028528 | 9.145657575 | 9.328346488 | protein_coding   | 15 | 64386322  | 64438289  | SNX1      |
| ENSG00000028839 | 7.35977471  | 7.243290054 | protein_coding   | 6  | 134273308 | 134308637 | TBPL1     |
| ENSG00000029153 | 9.626438993 | 8.942603846 | protein_coding   | 12 | 27485787  | 27576241  | ARNTL2    |
| ENSG00000029363 | 10.45207816 | 10.67110946 | protein_coding   | 6  | 136578001 | 136610989 | BCLAF1    |
| ENSG00000029364 | 11.02114496 | 10.67495649 | protein_coding   | 14 | 69864732  | 69929105  | SLC39A9   |
| ENSG00000029534 | 6.244259325 | 4.42790041  | protein_coding   | 8  | 41510739  | 41754280  | ANK1      |
| ENSG00000029639 | 6.670228606 | 6.746227492 | protein_coding   | 6  | 155578643 | 155635627 | TFB1M     |
| ENSG00000029725 | 10.28292016 | 10.99153907 | protein_coding   | 17 | 5185558   | 5289129   | RABEP1    |
| ENSG00000029993 | 9.217529022 | 8.726612716 | protein_coding   | X  | 150148982 | 150159248 | HMGB3     |
| ENSG00000030066 | 10.08961991 | 10.12793923 | protein_coding   | 11 | 47799639  | 47870107  | NUP160    |
| ENSG00000030110 | 8.215945216 | 8.14493792  | protein_coding   | 6  | 33540324  | 33548070  | BAK1      |
| ENSG00000030304 | 0.869158192 | 0           | protein_coding   | 9  | 113431051 | 113563859 | MUSK      |
| ENSG00000030419 | 5.485736881 | 5.995870484 | protein_coding   | 2  | 213864429 | 214017151 | IKZF2     |
| ENSG00000030582 | 11.76218811 | 12.78306555 | protein_coding   | 17 | 42422491  | 42430470  | GRN       |
| ENSG00000031003 | 7.334137164 | 8.024328814 | protein_coding   | 5  | 137273649 | 137387650 | FAM13B    |
| ENSG00000031081 | 8.422952257 | 8.643790155 | protein_coding   | 3  | 119013220 | 119139561 | ARHGAP31  |
| ENSG00000031544 | 3.652182994 | 4.319727133 | processed_transc | 15 | 72084977  | 72110600  | NR2E3     |
| ENSG00000031691 | 6.112579918 | 6.854868327 | protein_coding   | 6  | 49431096  | 49460820  | CENPQ     |
| ENSG00000031698 | 10.77558713 | 11.09525222 | protein_coding   | 1  | 109756540 | 109780791 | SARS      |
| ENSG00000031823 | 10.03667449 | 10.27603922 | protein_coding   | 19 | 5916154   | 5978320   | RANBP3    |
| ENSG00000032219 | 8.070482475 | 7.973469823 | protein_coding   | 14 | 58765103  | 58840605  | ARID4A    |
| ENSG00000032389 | 8.607011344 | 7.991210667 | protein_coding   | 2  | 3192696   | 3381653   | TSSC1     |
| ENSG00000032444 | 11.36106887 | 11.44483493 | protein_coding   | 19 | 7599038   | 7626653   | PNPLA6    |
| ENSG00000032742 | 6.442380648 | 6.450406542 | protein_coding   | 13 | 21140585  | 21265572  | IFT88     |
| ENSG00000033011 | 7.549958459 | 7.805153958 | protein_coding   | 16 | 5083703   | 5135395   | ALG1      |
| ENSG00000033030 | 8.518728184 | 8.516036237 | protein_coding   | 12 | 122957417 | 122985518 | ZCCHC8    |
| ENSG00000033050 | 10.65946972 | 10.29687419 | protein_coding   | 7  | 150904923 | 150924316 | ABCDF2    |
| ENSG00000033100 | 10.27908628 | 9.789702559 | protein_coding   | 7  | 150929575 | 150935908 | CHPF2     |
| ENSG00000033122 | 1.16343121  | 1.518964905 | protein_coding   | 1  | 70034081  | 70589164  | LRRC7     |
| ENSG00000033170 | 10.19968132 | 10.74250451 | protein_coding   | 14 | 65877310  | 66210839  | FUT8      |
| ENSG00000033178 | 10.40492027 | 10.57085065 | protein_coding   | 4  | 68481479  | 68566897  | UBA6      |
| ENSG00000033327 | 5.977159882 | 6.673373662 | protein_coding   | 11 | 77926343  | 78129394  | GAB2      |
| ENSG00000033627 | 8.906929163 | 8.595894166 | protein_coding   | 17 | 40610862  | 40674596  | ATP6V0A1  |
| ENSG00000033800 | 7.698004462 | 7.764467022 | protein_coding   | 15 | 68346517  | 68483096  | PIAS1     |
| ENSG00000033867 | 8.981959173 | 8.686884751 | protein_coding   | 3  | 27414214  | 27525911  | SLC4A7    |
| ENSG00000034063 | 11.07603452 | 10.84411243 | protein_coding   | 19 | 4909510   | 4962162   | UHRF1     |
| ENSG00000034152 | 10.36749671 | 10.04925084 | protein_coding   | 17 | 21187984  | 21218552  | MAP2K3    |
| ENSG00000034510 | 13.07484232 | 13.72817777 | protein_coding   | 2  | 85132749  | 85133795  | TMSB10    |
| ENSG00000034533 | 5.986594255 | 6.044260771 | protein_coding   | 3  | 130732719 | 130746493 | ASTE1     |
| ENSG00000034677 | 7.821758815 | 7.987679908 | protein_coding   | 8  | 101269288 | 101348446 | RNF19A    |
| ENSG00000034693 | 7.599989788 | 8.229580833 | protein_coding   | 6  | 143771918 | 143811753 | PEX3      |
| ENSG00000034713 | 8.799958495 | 8.725553248 | protein_coding   | 16 | 75600249  | 75611779  | GABARAPL2 |
| ENSG00000035115 | 7.127924785 | 6.787424764 | protein_coding   | 2  | 217730    | 266398    | SH3YL1    |
| ENSG00000035141 | 8.429884808 | 8.724493    | protein_coding   | 2  | 70523107  | 70529222  | FAM136A   |
| ENSG00000035403 | 11.55941449 | 11.03430824 | protein_coding   | 10 | 75757872  | 75879918  | VCL       |
| ENSG00000035499 | 7.530740159 | 7.741590246 | protein_coding   | 5  | 59892739  | 59996017  | DEPDC1B   |
| ENSG00000035664 | 4.883502971 | 4.794098771 | protein_coding   | 15 | 64199235  | 64364232  | DAPK2     |
| ENSG00000035681 | 8.842144812 | 9.116755954 | protein_coding   | 8  | 59496063  | 59572403  | NSMAF     |
| ENSG00000035687 | 9.56636357  | 9.915351046 | protein_coding   | 1  | 244571796 | 244615436 | ADSS      |
| ENSG00000035720 | 0           | 0.697730409 | protein_coding   | 4  | 68424446  | 68473055  | STAP1     |
| ENSG00000035862 | 10.62061112 | 10.37834106 | protein_coding   | 17 | 76849059  | 76921469  | TIMP2     |
| ENSG00000035928 | 10.08797732 | 10.1744918  | protein_coding   | 4  | 39289076  | 39367995  | RFC1      |
| ENSG00000036054 | 9.094219895 | 9.232406246 | protein_coding   | 3  | 99979844  | 100044095 | TBC1D23   |
| ENSG00000036257 | 9.856739382 | 9.548022979 | protein_coding   | 2  | 225334867 | 225450110 | CUL3      |
| ENSG00000036473 | 0           | 0.390640832 | protein_coding   | X  | 38211798  | 38280703  | OTC       |
| ENSG00000036530 | 2.35979773  | 2.144285137 | protein_coding   | 14 | 100150641 | 100193638 | CYP46A1   |
| ENSG00000036549 | 8.89695732  | 9.038718229 | protein_coding   | 1  | 78028101  | 78149104  | ZZZ3      |
| ENSG00000036672 | 6.313367288 | 5.871116342 | protein_coding   | 11 | 119225925 | 119252436 | USP2      |
| ENSG00000037042 | 7.049074049 | 7.507697912 | protein_coding   | 17 | 40811266  | 40819021  | TUBG2     |
| ENSG00000037241 | 6.766474304 | 7.600774083 | protein_coding   | 5  | 172385732 | 172396774 | RPL26L1   |



|                 |             |             |                |    |           |           |         |
|-----------------|-------------|-------------|----------------|----|-----------|-----------|---------|
| ENSG00000037280 | 0.869158192 | 0.950786998 | protein_coding | 5  | 180028506 | 180076624 | FLT4    |
| ENSG00000037474 | 11.39112882 | 11.02852092 | protein_coding | 5  | 6599352   | 6633404   | NSUN2   |
| ENSG00000037637 | 8.072698871 | 8.213044874 | protein_coding | 1  | 16573334  | 16678949  | FBXO42  |
| ENSG00000037749 | 8.599344916 | 8.461080043 | protein_coding | 5  | 153418466 | 153600038 | MFAP3   |
| ENSG00000037757 | 8.107705799 | 8.11126287  | protein_coding | 19 | 13875337  | 13885096  | MRI1    |
| ENSG00000037897 | 8.177331204 | 8.25035614  | protein_coding | 12 | 58162254  | 58166576  | METTL1  |
| ENSG00000037965 | 4.409500985 | 4.710890357 | protein_coding | 12 | 54402832  | 54407570  | HOXC8   |
| ENSG00000038002 | 7.250461488 | 8.432796436 | protein_coding | 4  | 178351924 | 178363657 | AGA     |
| ENSG00000038210 | 8.513842764 | 8.810943783 | protein_coding | 4  | 25162263  | 25280714  | PI4K2B  |
| ENSG00000038219 | 8.990190269 | 9.198444985 | protein_coding | 4  | 13570362  | 13629347  | BOD1L   |
| ENSG00000038274 | 8.546104025 | 9.031020259 | protein_coding | 5  | 162930120 | 162946342 | MAT2B   |
| ENSG00000038295 | 0.869158192 | 0.390640832 | protein_coding | 4  | 166794410 | 167025047 | TLL1    |
| ENSG00000038358 | 10.33139226 | 10.29151462 | protein_coding | 16 | 67906975  | 67918406  | EDC4    |
| ENSG00000038382 | 12.38774818 | 12.04600302 | protein_coding | 5  | 14143811  | 14532235  | TRIO    |
| ENSG00000038427 | 12.13456961 | 11.83711343 | protein_coding | 5  | 82767284  | 82878122  | VCAN    |
| ENSG00000038532 | 9.044272373 | 8.864865519 | protein_coding | 16 | 11038345  | 11276046  | CLEC16A |
| ENSG00000039068 | 9.750685625 | 2.242360793 | protein_coding | 16 | 68771128  | 68869445  | CDH1    |
| ENSG00000039123 | 9.479658457 | 9.377739515 | protein_coding | 5  | 54603588  | 54721409  | SKIV2L2 |
| ENSG00000039139 | 8.045874708 | 7.373448694 | protein_coding | 5  | 13690440  | 13944652  | DNAH5   |
| ENSG00000039319 | 8.605481314 | 8.84060518  | protein_coding | 5  | 79703832  | 79775169  | ZFYVE16 |
| ENSG00000039523 | 10.58456506 | 10.23902354 | protein_coding | 16 | 67552321  | 67580689  | FAM65A  |
| ENSG00000039560 | 10.97627036 | 10.09795979 | protein_coding | 5  | 34656342  | 34832732  | RAI14   |
| ENSG00000039600 | 0.499066092 | 1.16600992  | protein_coding | 5  | 157052687 | 157098488 | SOX30   |
| ENSG00000039650 | 8.255505039 | 8.240005883 | protein_coding | 19 | 50364462  | 50370818  | PNKP    |
| ENSG00000039987 | 1.16343121  | 1.802319292 | protein_coding | 19 | 12862516  | 12869272  | BEST2   |
| ENSG00000040199 | 7.686472517 | 7.641787375 | protein_coding | 16 | 71671738  | 71758604  | PHLPP2  |
| ENSG00000040275 | 8.623735441 | 8.957119685 | protein_coding | 5  | 169010638 | 169031782 | CCDC99  |
| ENSG00000040341 | 7.250461488 | 7.03670965  | protein_coding | 8  | 74332604  | 74659943  | STAU2   |
| ENSG00000040487 | 7.035502862 | 7.505230566 | protein_coding | 1  | 19638820  | 19655794  | PQLC2   |
| ENSG00000040531 | 8.554057865 | 9.303001007 | protein_coding | 17 | 3539762   | 3564836   | CTNS    |
| ENSG00000040608 | 7.106450572 | 6.762847836 | protein_coding | 22 | 20228938  | 20270769  | RTN4R   |
| ENSG00000040633 | 9.561637084 | 10.24421147 | protein_coding | 17 | 7138350   | 7142825   | PHF23   |
| ENSG00000040933 | 8.507303029 | 8.241489045 | protein_coding | 2  | 99061317  | 99207496  | INPP4A  |
| ENSG00000041353 | 7.952677993 | 7.41347308  | protein_coding | 18 | 52495708  | 52562747  | RAB27B  |
| ENSG00000041357 | 9.847708073 | 10.34423495 | protein_coding | 15 | 78832747  | 78841604  | PSMA4   |
| ENSG00000041515 | 0.499066092 | 0           | protein_coding | 13 | 109248500 | 109860355 | MYO16   |
| ENSG00000041802 | 9.354083505 | 9.295880847 | protein_coding | 3  | 194361517 | 194393206 | LSG1    |
| ENSG00000041880 | 7.169937448 | 7.84667518  | protein_coding | 3  | 51976361  | 51982883  | PARP3   |
| ENSG00000041982 | 11.8309055  | 13.1220881  | protein_coding | 9  | 117782806 | 117880536 | TNC     |
| ENSG00000041988 | 6.343050432 | 6.988061092 | protein_coding | 1  | 6684926   | 6695646   | THAP3   |
| ENSG00000042062 | 7.803191723 | 7.472765069 | protein_coding | 20 | 49202645  | 49308065  | FAM65C  |
| ENSG00000042088 | 8.991362316 | 8.576046394 | protein_coding | 14 | 90421283  | 90511106  | TDP1    |
| ENSG00000042286 | 8.649206367 | 7.975253757 | protein_coding | 10 | 71857979  | 71892690  | AIFM2   |
| ENSG00000042317 | 6.646617938 | 6.360445592 | protein_coding | 14 | 88851268  | 88936694  | SPATA7  |
| ENSG00000042429 | 8.278730502 | 8.75700367  | protein_coding | 11 | 93517393  | 93547861  | MED17   |
| ENSG00000042445 | 9.53214319  | 9.684588223 | protein_coding | 2  | 85569211  | 85581743  | RETSAT  |
| ENSG00000042493 | 9.767886    | 9.702468294 | protein_coding | 2  | 85621346  | 85645555  | CAPG    |
| ENSG00000042753 | 9.878440025 | 10.46849361 | protein_coding | 19 | 47341423  | 47354203  | AP2S1   |
| ENSG00000042781 | 1.16343121  | 3.368666104 | protein_coding | 1  | 215796236 | 216596738 | USH2A   |
| ENSG00000042832 | 0           | 0.390640832 | protein_coding | 8  | 133879203 | 134147147 | TG      |
| ENSG00000042980 | 2.35979773  | 3.232099092 | protein_coding | 8  | 24151553  | 24216531  | ADAM28  |
| ENSG00000043039 | 5.175139844 | 3.714580548 | protein_coding | 11 | 129245835 | 129322171 | BARX2   |
| ENSG00000043093 | 8.876804446 | 8.617758557 | protein_coding | 3  | 182655862 | 182703741 | DCUN1D1 |
| ENSG00000043143 | 9.092036341 | 7.500283181 | protein_coding | 5  | 133860003 | 133918918 | PHF15   |
| ENSG00000043355 | 8.016241092 | 7.416102302 | protein_coding | 13 | 100634026 | 100639018 | ZIC2    |
| ENSG00000043514 | 7.471499737 | 7.515074729 | protein_coding | 1  | 40306708  | 40349183  | TRIT1   |
| ENSG00000043591 | 3.211941663 | 1.925536307 | protein_coding | 10 | 115803806 | 115806667 | ADRB1   |
| ENSG00000044090 | 9.456930686 | 10.21582146 | protein_coding | 6  | 43005355  | 43021683  | CUL7    |
| ENSG00000044115 | 11.72444875 | 11.59480528 | protein_coding | 5  | 137946656 | 138270723 | CTNNA1  |
| ENSG00000044446 | 8.53006357  | 8.581912372 | protein_coding | X  | 18910418  | 19002716  | PHKA2   |
| ENSG00000044459 | 5.60078458  | 5.832272499 | protein_coding | 9  | 17134980  | 17503921  | CNTLN   |
| ENSG00000044574 | 13.18950907 | 13.24270751 | protein_coding | 9  | 127997132 | 128003622 | HSPA5   |
| ENSG00000046604 | 11.10826314 | 10.47039222 | protein_coding | 18 | 29078027  | 29128813  | DSG2    |

|                 |             |             |                  |   |    |           |           |          |
|-----------------|-------------|-------------|------------------|---|----|-----------|-----------|----------|
| ENSG00000046647 | 6.204385613 | 6.568558581 | protein_coding   | X |    | 14026398  | 14048012  | GEMIN8   |
| ENSG00000046651 | 7.60612345  | 8.049948078 | protein_coding   | X |    | 13752832  | 13787480  | OFD1     |
| ENSG00000046653 | 3.004694206 | 3.133298822 | protein_coding   | X |    | 13789150  | 13956757  | GPM6B    |
| ENSG00000046774 | 0           | 0.390640832 | protein_coding   | X |    | 141290131 | 141293076 | MAGEC2   |
| ENSG00000047056 | 7.537174746 | 7.154756319 | protein_coding   |   | 10 | 1095478   | 1178237   | WDR37    |
| ENSG00000047188 | 9.086562954 | 8.869669013 | protein_coding   |   | 5  | 112849380 | 112930982 | YTHDC2   |
| ENSG00000047230 | 7.933293789 | 7.683850422 | protein_coding   | X |    | 16606126  | 16731059  | CTPS2    |
| ENSG00000047249 | 8.45218826  | 8.439273392 | protein_coding   |   | 8  | 54628117  | 54756118  | ATP6V1H  |
| ENSG00000047315 | 10.34199724 | 10.72882263 | protein_coding   |   | 4  | 57843888  | 57897334  | POLR2B   |
| ENSG00000047346 | 6.658471572 | 7.0637896   | protein_coding   |   | 15 | 52873514  | 53002014  | FAM214A  |
| ENSG00000047365 | 5.346128795 | 5.004391715 | protein_coding   |   | 4  | 36067620  | 36246131  | ARAP2    |
| ENSG00000047410 | 10.32350339 | 10.66421414 | protein_coding   |   | 1  | 186282954 | 186344825 | TPR      |
| ENSG00000047457 | 5.191549282 | 3.32456471  | protein_coding   |   | 3  | 148880197 | 148939842 | CP       |
| ENSG00000047578 | 8.693086466 | 8.265014588 | protein_coding   |   | 16 | 27561454  | 27791690  | KIAA0556 |
| ENSG00000047579 | 6.721980839 | 7.309836726 | protein_coding   |   | 6  | 15523032  | 15663289  | DTNBP1   |
| ENSG00000047621 | 7.765324926 | 7.992972811 | protein_coding   |   | 12 | 4596894   | 4647674   | C12orf4  |
| ENSG00000047634 | 8.431612753 | 8.98660512  | protein_coding   | X |    | 17755588  | 17773105  | SCML1    |
| ENSG00000047644 | 9.837316871 | 9.618206363 | protein_coding   | X |    | 9983602   | 10112518  | WWC3     |
| ENSG00000047648 | 0.499066092 | 1.802319292 | protein_coding   | X |    | 11136239  | 11683821  | ARHGAP6  |
| ENSG00000047662 | 5.977159882 | 5.855704078 | protein_coding   |   | 4  | 17630929  | 17783135  | FAM184B  |
| ENSG00000047849 | 12.41802582 | 12.22628546 | protein_coding   |   | 3  | 47892182  | 48130769  | MAP4     |
| ENSG00000047932 | 8.652173596 | 8.689060408 | protein_coding   |   | 6  | 117639374 | 117923691 | GOPC     |
| ENSG00000047936 | 5.588445295 | 4.810179682 | protein_coding   |   | 6  | 117609463 | 117747018 | ROS1     |
| ENSG00000048028 | 9.123378905 | 9.222677059 | protein_coding   |   | 11 | 113668596 | 113746292 | USP28    |
| ENSG00000048052 | 8.748205354 | 9.112709611 | protein_coding   |   | 7  | 18126572  | 19036993  | HDAC9    |
| ENSG00000048140 | 9.332973914 | 9.291591823 | protein_coding   |   | 5  | 176074388 | 176086058 | TSPAN17  |
| ENSG00000048162 | 8.105542576 | 8.542748725 | protein_coding   |   | 5  | 175810949 | 175815976 | NOP16    |
| ENSG00000048342 | 7.182306324 | 6.926693689 | protein_coding   |   | 4  | 15471489  | 15603180  | CC2D2A   |
| ENSG00000048392 | 7.584540566 | 7.811159227 | protein_coding   |   | 8  | 103216730 | 103251346 | RRM2B    |
| ENSG00000048405 | 7.80585884  | 7.551403417 | protein_coding   |   | 7  | 126986844 | 127071978 | ZNF800   |
| ENSG00000048462 | 0           | 0.697730409 | protein_coding   |   | 16 | 12058964  | 12061925  | TNFRSF17 |
| ENSG00000048471 | 8.114176072 | 7.989446368 | protein_coding   |   | 16 | 12070594  | 12668146  | SNX29    |
| ENSG00000048540 | 2.471521042 | 2.579085888 | protein_coding   |   | 12 | 16701307  | 16763528  | LMO3     |
| ENSG00000048544 | 9.225519491 | 9.069105817 | protein_coding   |   | 6  | 42174539  | 42185603  | MRPS10   |
| ENSG00000048545 | 0           | 0.390640832 | protein_coding   |   | 6  | 42123144  | 42147794  | GUCA1A   |
| ENSG00000048649 | 9.142495894 | 9.329044212 | protein_coding   |   | 11 | 77371041  | 77532063  | RSF1     |
| ENSG00000048707 | 8.909411391 | 8.729786462 | protein_coding   |   | 1  | 12290124  | 12572099  | VPS13D   |
| ENSG00000048740 | 0.869158192 | 0.950786998 | protein_coding   |   | 10 | 11047259  | 11378666  | CELF2    |
| ENSG00000048828 | 12.18127881 | 11.74548469 | protein_coding   |   | 9  | 96214173  | 96328397  | FAM120A  |
| ENSG00000048991 | 10.1300883  | 9.659843595 | protein_coding   |   | 2  | 136289025 | 136482840 | R3HDM1   |
| ENSG00000049089 | 4.261916566 | 4.319727133 | protein_coding   |   | 1  | 40766159  | 40783488  | COL9A2   |
| ENSG00000049130 | 8.114176072 | 6.729413443 | protein_coding   |   | 12 | 88885885  | 88974628  | KITLG    |
| ENSG00000049167 | 6.693459083 | 6.592001111 | protein_coding   |   | 5  | 60169658  | 60240900  | ERCC8    |
| ENSG00000049192 | 6.994006093 | 7.318294738 | protein_coding   |   | 5  | 64444563  | 64777747  | ADAMTS6  |
| ENSG00000049239 | 10.16634253 | 10.20521953 | protein_coding   |   | 1  | 9294863   | 9331396   | H6PD     |
| ENSG00000049245 | 9.790280964 | 9.582371442 | protein_coding   |   | 1  | 7831329   | 7841492   | VAMP3    |
| ENSG00000049246 | 6.793601635 | 6.110690132 | protein_coding   |   | 1  | 7844380   | 7905237   | PER3     |
| ENSG00000049249 | 8.185546801 | 8.022604578 | protein_coding   |   | 1  | 7979907   | 8000926   | TNFRSF9  |
| ENSG00000049283 | 6.379315619 | 1.802319292 | protein_coding   |   | 17 | 48609904  | 48621111  | EPN3     |
| ENSG00000049319 | 1.616589159 | 0.390640832 | processed_transc |   | 2  | 31747550  | 31806136  | SRD5A2   |
| ENSG00000049323 | 8.12275821  | 9.099684516 | protein_coding   |   | 2  | 33172039  | 33624576  | LTBP1    |
| ENSG00000049449 | 11.15346388 | 11.28087678 | protein_coding   |   | 11 | 31833939  | 32127301  | RCN1     |
| ENSG00000049540 | 1.616589159 | 2.788380093 | protein_coding   |   | 7  | 73442119  | 73484237  | ELN      |
| ENSG00000049541 | 8.993703557 | 8.810943783 | protein_coding   |   | 7  | 73645829  | 73668774  | RFC2     |
| ENSG00000049618 | 9.490475063 | 9.528108569 | protein_coding   |   | 6  | 157099063 | 157530401 | ARID1B   |
| ENSG00000049656 | 11.56572272 | 11.22236782 | protein_coding   |   | 5  | 1317859   | 1345214   | CLPTM1L  |
| ENSG00000049759 | 10.52105974 | 10.59918141 | protein_coding   |   | 18 | 55711619  | 56068772  | NEDD4L   |
| ENSG00000049768 | 3.652182994 | 3.714580548 | protein_coding   | X |    | 49106897  | 49121288  | FOXP3    |
| ENSG00000049769 | 7.169937448 | 7.807158493 | protein_coding   | X |    | 49126306  | 49157929  | PPP1R3F  |
| ENSG00000049860 | 10.02241241 | 10.41100059 | protein_coding   |   | 5  | 73935848  | 74018472  | HEXB     |
| ENSG00000049883 | 6.228441838 | 6.051043053 | protein_coding   |   | 5  | 71616194  | 71656052  | PTCD2    |
| ENSG00000050130 | 9.237422823 | 9.484933332 | protein_coding   |   | 14 | 59951161  | 59971429  | JKAMP    |
| ENSG00000050165 | 1.616589159 | 0.697730409 | protein_coding   |   | 11 | 11984653  | 12031316  | DKK3     |

|                 |             |             |                |    |           |           |          |
|-----------------|-------------|-------------|----------------|----|-----------|-----------|----------|
| ENSG00000050327 | 6.877132514 | 5.66550919  | protein_coding | 7  | 144052381 | 144077725 | ARHGEF5  |
| ENSG00000050344 | 11.12971059 | 10.40505707 | protein_coding | 7  | 26191860  | 26226745  | NFE2L3   |
| ENSG00000050393 | 8.061582684 | 8.303864205 | protein_coding | 6  | 13791020  | 13814800  | CCDC90A  |
| ENSG00000050405 | 10.94787535 | 10.80377176 | protein_coding | 12 | 50569571  | 50677353  | LIMA1    |
| ENSG00000050426 | 9.920270706 | 9.950689189 | protein_coding | 12 | 51441745  | 51454207  | LITMD1   |
| ENSG00000050438 | 2.35979773  | 3.027231696 | protein_coding | 12 | 51785101  | 51902980  | SLC4A8   |
| ENSG00000050555 | 0.869158192 | 0.390640832 | protein_coding | 9  | 133884469 | 133969860 | LAMC3    |
| ENSG00000050628 | 0           | 1.16600992  | protein_coding | 1  | 71318036  | 71513491  | PTGER3   |
| ENSG00000050730 | 7.066972635 | 7.477807561 | protein_coding | 4  | 122052563 | 122148621 | TNIP3    |
| ENSG00000050748 | 8.728660495 | 8.480051236 | protein_coding | 5  | 179660143 | 179719099 | MAPK9    |
| ENSG00000050767 | 0.499066092 | 1.16600992  | protein_coding | 5  | 177664619 | 178017556 | COL23A1  |
| ENSG00000050820 | 10.60958628 | 10.2319528  | protein_coding | 16 | 75262928  | 75301951  | BCAR1    |
| ENSG00000051009 | 8.525216449 | 8.715982854 | protein_coding | 11 | 6232565   | 6255941   | FAM160A2 |
| ENSG00000051108 | 9.915339294 | 10.26003019 | protein_coding | 16 | 56965960  | 56977798  | HERPUD1  |
| ENSG00000051128 | 9.843820138 | 9.799804744 | protein_coding | 19 | 19040010  | 19052041  | HOMER3   |
| ENSG00000051180 | 7.945439403 | 8.0397549   | protein_coding | 15 | 40986972  | 41024356  | RAD51    |
| ENSG00000051341 | 7.923503136 | 8.027771115 | protein_coding | 3  | 121150274 | 121265488 | POLQ     |
| ENSG00000051382 | 8.8704485   | 8.490068116 | protein_coding | 3  | 138372860 | 138553780 | PIK3CB   |
| ENSG00000051523 | 10.605765   | 10.77051277 | protein_coding | 16 | 88709691  | 88717560  | CYBA     |
| ENSG00000051596 | 6.023726639 | 6.270323763 | protein_coding | 5  | 175344876 | 175461683 | THOC3    |
| ENSG00000051620 | 7.983632192 | 8.458531597 | protein_coding | 6  | 138724668 | 138734310 | HEBP2    |
| ENSG00000051825 | 8.011627561 | 8.130601896 | protein_coding | 12 | 123636867 | 123728561 | MPHOSPH9 |
| ENSG00000052126 | 8.124895791 | 7.475288518 | protein_coding | 12 | 19282648  | 19529334  | PLEKHA5  |
| ENSG00000052344 | 6.846372398 | 3.232099092 | protein_coding | 16 | 31142756  | 31147083  | PRSS8    |
| ENSG00000052723 | 7.959880444 | 8.013952351 | protein_coding | 1  | 115312100 | 115323306 | SIKE1    |
| ENSG00000052749 | 10.34612589 | 10.46119237 | protein_coding | 10 | 99116115  | 99161127  | RRP12    |
| ENSG00000052795 | 6.699208722 | 7.801136513 | protein_coding | 4  | 159690290 | 159829201 | FNIP2    |
| ENSG00000052802 | 9.143550557 | 7.784953917 | protein_coding | 4  | 166248775 | 166264312 | MSMO1    |
| ENSG00000052841 | 9.309672858 | 9.906496457 | protein_coding | 11 | 43380482  | 43516483  | TTC17    |
| ENSG00000052850 | 1.16343121  | 2.039052734 | protein_coding | 11 | 44281994  | 44331716  | ALX4     |
| ENSG00000053108 | 0.869158192 | 0           | protein_coding | 5  | 132532147 | 132948255 | FSTL4    |
| ENSG00000053254 | 9.106170722 | 8.913126522 | protein_coding | 14 | 89591215  | 90085493  | FOXN3    |
| ENSG00000053371 | 8.185546801 | 8.591248608 | protein_coding | 1  | 19630459  | 19638640  | AKR7A2   |
| ENSG00000053372 | 9.38294884  | 9.369623887 | protein_coding | 1  | 19578033  | 19586622  | MRTO4    |
| ENSG00000053438 | 3.274897671 | 3.532712221 | protein_coding | 20 | 36149617  | 36152092  | NNAT     |
| ENSG00000053501 | 8.3480754   | 8.715982854 | protein_coding | 19 | 17326155  | 17330638  | USE1     |
| ENSG00000053524 | 5.207774174 | 5.112089758 | protein_coding | 3  | 182895831 | 183146566 | MCF2L2   |
| ENSG00000053702 | 4.352265886 | 3.906303962 | protein_coding | 12 | 2934514   | 2944710   | NRIP2    |
| ENSG00000053747 | 8.893200037 | 5.393992    | protein_coding | 18 | 21269562  | 21535030  | LAMA3    |
| ENSG00000053770 | 8.864064429 | 9.173021923 | protein_coding | 14 | 57735627  | 57756797  | MUDENG   |
| ENSG00000053900 | 7.754320745 | 7.962719647 | protein_coding | 4  | 25378835  | 25420120  | ANAPC4   |
| ENSG00000053918 | 4.19837882  | 3.411459265 | protein_coding | 11 | 2465914   | 2870221   | KCNQ1    |
| ENSG00000054116 | 8.797280438 | 8.782698567 | protein_coding | 1  | 36602173  | 36615098  | TRAPPC3  |
| ENSG00000054118 | 10.82474139 | 10.76742745 | protein_coding | 1  | 36690017  | 36770958  | THRAP3   |
| ENSG00000054148 | 9.088754802 | 9.392500624 | protein_coding | 9  | 139743176 | 139745488 | PHPT1    |
| ENSG00000054179 | 3.448790144 | 1.518964905 | protein_coding | 9  | 139942550 | 139948497 | ENTPD2   |
| ENSG00000054219 | 0.499066092 | 0.697730409 | protein_coding | 2  | 160628362 | 160761260 | LY75     |
| ENSG00000054267 | 8.640267888 | 8.683615101 | protein_coding | 1  | 235294949 | 235491534 | ARID4B   |
| ENSG00000054277 | 6.861834435 | 7.04352744  | protein_coding | 1  | 241753404 | 241840678 | OPN3     |
| ENSG00000054282 | 7.33043718  | 7.67728988  | protein_coding | 1  | 243419320 | 243663394 | SDCCAG8  |
| ENSG00000054356 | 1.16343121  | 2.242360793 | protein_coding | 2  | 220154345 | 220174370 | PTPRN    |
| ENSG00000054392 | 3.652182994 | 3.570966319 | protein_coding | 1  | 210501596 | 210849638 | HHAT     |
| ENSG00000054523 | 9.94104316  | 9.834615514 | protein_coding | 1  | 10270764  | 10441661  | KIF1B    |
| ENSG00000054598 | 8.048129203 | 8.522150834 | protein_coding | 6  | 1610679   | 1614127   | FOXC1    |
| ENSG00000054611 | 8.984315711 | 9.275755399 | protein_coding | 22 | 47158518  | 47571336  | TBC1D22A |
| ENSG00000054654 | 9.030655728 | 9.616492755 | protein_coding | 14 | 64319683  | 64693165  | SYNE2    |
| ENSG00000054690 | 8.546104025 | 8.711708882 | protein_coding | 14 | 68000018  | 68056329  | PLEKHH1  |
| ENSG00000054793 | 9.276405902 | 8.797898671 | protein_coding | 20 | 50213053  | 50385173  | ATP9A    |
| ENSG00000054938 | 2.238690726 | 2.144285137 | protein_coding | 11 | 74407474  | 74442430  | CHRD1L2  |
| ENSG00000054965 | 9.643686274 | 9.583541409 | protein_coding | 11 | 73111532  | 73309234  | FAM168A  |
| ENSG00000054967 | 7.80585884  | 8.090015513 | protein_coding | 11 | 73087309  | 73108519  | RELT     |
| ENSG00000054983 | 9.013452178 | 9.056522014 | protein_coding | 14 | 88304164  | 88460009  | GALC     |
| ENSG00000055044 | 10.36839913 | 10.37631728 | protein_coding | 2  | 203130439 | 203168389 | NOP58    |

|                 |             |             |                |    |           |           |          |
|-----------------|-------------|-------------|----------------|----|-----------|-----------|----------|
| ENSG00000055070 | 10.15174033 | 10.00671086 | protein_coding | 1  | 16679070  | 16724640  | C1orf144 |
| ENSG00000055118 | 3.274897671 | 2.501982735 | protein_coding | 7  | 150642049 | 150675403 | KCNH2    |
| ENSG00000055130 | 10.22630637 | 10.1024558  | protein_coding | 7  | 148395006 | 148498201 | CUL1     |
| ENSG00000055147 | 7.190493718 | 7.378849871 | protein_coding | 5  | 153369688 | 153418496 | FAM114A2 |
| ENSG00000055163 | 1.407729925 | 0.950786998 | protein_coding | 5  | 156693089 | 156822606 | CYFIP2   |
| ENSG00000055208 | 9.796328827 | 9.610765985 | protein_coding | 6  | 149539777 | 149732749 | TAB2     |
| ENSG00000055211 | 7.792473675 | 7.946442679 | protein_coding | 6  | 149887410 | 149912884 | C6orf72  |
| ENSG00000055332 | 10.19714397 | 10.78736503 | protein_coding | 2  | 37326353  | 37384208  | EIF2AK2  |
| ENSG00000055483 | 9.427791605 | 9.081580806 | protein_coding | 17 | 76792965  | 76836969  | USP36    |
| ENSG00000055609 | 9.545769354 | 9.093948849 | protein_coding | 7  | 151832010 | 152133090 | MLL3     |
| ENSG00000055732 | 5.090170488 | 4.363974406 | protein_coding | 1  | 85483765  | 85514182  | MCOLN3   |
| ENSG00000055813 | 0           | 0.390640832 | protein_coding | 2  | 56411258  | 56613308  | CCDC85A  |
| ENSG00000055917 | 10.21431058 | 9.91813598  | protein_coding | 2  | 20448452  | 20551995  | PUM2     |
| ENSG00000055950 | 8.846037259 | 9.246508835 | protein_coding | 10 | 102729215 | 102747272 | MRPL43   |
| ENSG00000055955 | 1.16343121  | 0.697730409 | protein_coding | 3  | 52846991  | 52865495  | ITIH4    |
| ENSG00000056050 | 7.04004079  | 7.703354924 | protein_coding | 4  | 170650616 | 170679104 | C4orf27  |
| ENSG00000056097 | 10.41587333 | 10.59599647 | protein_coding | 5  | 32354456  | 32444867  | ZFR      |
| ENSG00000056277 | 7.345180517 | 7.195117037 | protein_coding | X  | 129336682 | 129402873 | ZNF280C  |
| ENSG00000056487 | 0.499066092 | 0           | protein_coding | 22 | 45277042  | 45405880  | PHF21B   |
| ENSG00000056558 | 9.532948302 | 10.69512212 | protein_coding | 9  | 123664671 | 123691451 | TRAF1    |
| ENSG00000056586 | 9.818289907 | 9.87244022  | protein_coding | 9  | 125606835 | 125667562 | RC3H2    |
| ENSG00000056661 | 7.660183591 | 7.348889996 | protein_coding | 17 | 36890150  | 36904558  | PCGF2    |
| ENSG00000056736 | 4.292665995 | 4.17820932  | protein_coding | 3  | 53880607  | 53899827  | IL17RB   |
| ENSG00000056972 | 8.325948295 | 8.262094789 | protein_coding | 6  | 111877657 | 111927481 | TRAF3IP2 |
| ENSG00000056998 | 0           | 0.390640832 | protein_coding | X  | 2746829   | 2800859   | GYG2     |
| ENSG00000057019 | 11.49083588 | 11.25541    | protein_coding | 3  | 98514785  | 98620533  | DCBLD2   |
| ENSG00000057149 | 4.352265886 | 2.039052734 | protein_coding | 18 | 61322431  | 61329197  | SERPINC3 |
| ENSG00000057252 | 9.848355045 | 9.931061721 | protein_coding | 1  | 179262925 | 179327815 | SOAT1    |
| ENSG00000057294 | 6.96088487  | 6.2290532   | protein_coding | 12 | 32943679  | 33049774  | PKP2     |
| ENSG00000057468 | 0.499066092 | 0.950786998 | protein_coding | 1  | 76262567  | 76378923  | MSH4     |
| ENSG00000057593 | 0           | 0.390640832 | protein_coding | 13 | 113760105 | 113774995 | F7       |
| ENSG00000057608 | 11.2523464  | 10.99747635 | protein_coding | 10 | 5807186   | 5884095   | GDI2     |
| ENSG00000057657 | 3.989024711 | 2.334191469 | protein_coding | 6  | 106534195 | 106557814 | PRDM1    |
| ENSG00000057663 | 8.045874708 | 8.200898549 | protein_coding | 6  | 106632351 | 106773666 | ATG5     |
| ENSG00000057704 | 6.809636522 | 5.751299057 | protein_coding | 12 | 94960900  | 95044338  | TMCC3    |
| ENSG00000057757 | 8.457286611 | 8.563056668 | protein_coding | 1  | 24104895  | 24114722  | PITHD1   |
| ENSG00000057935 | 8.096857104 | 8.143352046 | protein_coding | 2  | 42721709  | 42984087  | MTA3     |
| ENSG00000058056 | 8.635777795 | 8.426290271 | protein_coding | 3  | 179370543 | 179507189 | USP13    |
| ENSG00000058063 | 9.895443335 | 9.870524428 | protein_coding | 3  | 182511288 | 182639423 | ATP11B   |
| ENSG00000058085 | 10.17410476 | 8.436686098 | protein_coding | 1  | 183155373 | 183214035 | LAMC2    |
| ENSG00000058091 | 6.970425921 | 7.449853178 | protein_coding | 7  | 90095738  | 90839905  | CDK14    |
| ENSG00000058262 | 12.40048713 | 12.27670419 | protein_coding | 3  | 127770484 | 127790526 | SEC61A1  |
| ENSG00000058272 | 8.900704842 | 8.935290787 | protein_coding | 12 | 80167343  | 80329240  | PPP1R12A |
| ENSG00000058335 | 3.335220907 | 2.579085888 | protein_coding | 15 | 79252289  | 79383215  | RASGRF1  |
| ENSG00000058404 | 1.799000381 | 2.420525079 | protein_coding | 7  | 44256749  | 44374176  | CAMK2B   |
| ENSG00000058453 | 7.91858278  | 7.856387513 | protein_coding | 1  | 17222232  | 17299459  | CROCC    |
| ENSG00000058600 | 9.498740691 | 9.707843036 | protein_coding | 16 | 22308730  | 22346424  | POLR3E   |
| ENSG00000058668 | 10.5736515  | 9.61477711  | protein_coding | 1  | 203595689 | 203713209 | ATP2B4   |
| ENSG00000058673 | 10.09562678 | 10.18532111 | protein_coding | 1  | 203764782 | 203823252 | ZC3H11A  |
| ENSG00000058729 | 7.726437377 | 7.778838337 | protein_coding | 5  | 96496571  | 96518964  | RIOK2    |
| ENSG00000058799 | 7.612231145 | 7.696882678 | protein_coding | 1  | 54317392  | 54356407  | YIPF1    |
| ENSG00000058804 | 9.327415887 | 9.244291255 | protein_coding | 1  | 54231133  | 54304533  | TMEM48   |
| ENSG00000058866 | 6.721980839 | 6.360445592 | protein_coding | 3  | 185823457 | 186080026 | DGKG     |
| ENSG00000059122 | 9.71423818  | 9.410412513 | protein_coding | 16 | 2961980   | 3001208   | FLYWCH1  |
| ENSG00000059145 | 8.215945216 | 8.18248514  | protein_coding | 16 | 1413206   | 1464752   | UNKL     |
| ENSG00000059377 | 4.19837882  | 4.202780776 | protein_coding | 7  | 139476850 | 139720125 | TBXAS1   |
| ENSG00000059378 | 9.465390183 | 9.460942741 | protein_coding | 7  | 139723544 | 139763521 | PARP12   |
| ENSG00000059573 | 10.73313074 | 10.84849884 | protein_coding | 10 | 97365696  | 97416463  | ALDH18A1 |
| ENSG00000059588 | 8.646233023 | 9.108651887 | protein_coding | 1  | 234527059 | 234614849 | TARBP1   |
| ENSG00000059691 | 8.688758029 | 9.472987904 | protein_coding | 4  | 152591656 | 152682175 | PET112   |
| ENSG00000059728 | 7.82964357  | 7.577474828 | protein_coding | 2  | 70124820  | 70170077  | MXD1     |
| ENSG00000059758 | 8.12703021  | 7.91704449  | protein_coding | 12 | 96672039  | 96794338  | CDK17    |
| ENSG00000059769 | 7.549958459 | 7.922602475 | protein_coding | 9  | 114393632 | 114432508 | DNAJC25  |

|                 |             |             |                |    |           |           |         |
|-----------------|-------------|-------------|----------------|----|-----------|-----------|---------|
| ENSG00000059804 | 8.973680846 | 8.46235258  | protein_coding | 12 | 8071826   | 8088871   | SLC2A3  |
| ENSG00000059915 | 3.830412367 | 3.532712221 | protein_coding | 10 | 104162376 | 104181296 | PSD     |
| ENSG00000060069 | 8.364450825 | 8.366375472 | protein_coding | 18 | 77439801  | 77514510  | CTDP1   |
| ENSG00000060138 | 12.01172959 | 11.44853179 | protein_coding | 12 | 10851683  | 10875911  | CSDA    |
| ENSG00000060140 | 5.286269488 | 4.021284656 | protein_coding | 12 | 10771538  | 10826917  | STYK1   |
| ENSG00000060237 | 11.50198055 | 11.0422015  | protein_coding | 12 | 861759    | 1020618   | WNK1    |
| ENSG00000060303 | 0.499066092 | 0.390640832 | pseudogene     | 6  | 50824968  | 50825375  | RPS17P5 |
| ENSG00000060339 | 9.364975797 | 9.526284462 | protein_coding | 10 | 70480769  | 70552134  | CCAR1   |
| ENSG00000060491 | 9.901690348 | 10.00234331 | protein_coding | 20 | 61436187  | 61445352  | OGFR    |
| ENSG00000060558 | 9.737474801 | 9.071609459 | protein_coding | 19 | 3136191   | 3163766   | GNA15   |
| ENSG00000060566 | 5.806547963 | 2.652276565 | protein_coding | 19 | 4153629   | 4173050   | CREB3L3 |
| ENSG00000060642 | 7.23866569  | 7.365308824 | protein_coding | 1  | 27113963  | 27124889  | PIGV    |
| ENSG00000060656 | 8.280649185 | 7.016060809 | protein_coding | 1  | 29563028  | 29653325  | PTPRU   |
| ENSG00000060688 | 9.037480115 | 9.066597822 | protein_coding | 1  | 31732417  | 31769662  | SNRNP40 |
| ENSG00000060709 | 0.499066092 | 0.697730409 | protein_coding | 12 | 130880682 | 131200826 | RIMBP2  |
| ENSG00000060718 | 0.499066092 | 0           | protein_coding | 1  | 103342023 | 103574052 | COL11A1 |
| ENSG00000060749 | 9.985245743 | 10.12150977 | protein_coding | 11 | 32914724  | 33014862  | QSER1   |
| ENSG00000060762 | 7.37062428  | 8.202422444 | protein_coding | 6  | 166778407 | 166796486 | BRP44L  |
| ENSG00000060971 | 7.990682129 | 8.099860884 | protein_coding | 3  | 38164201  | 38178733  | ACAA1   |
| ENSG00000060982 | 11.18760954 | 10.92871239 | protein_coding | 12 | 24964295  | 25102393  | BCAT1   |
| ENSG00000061273 | 9.801683503 | 10.0214624  | protein_coding | 12 | 48176505  | 48226915  | HDAC7   |
| ENSG00000061337 | 1.960915222 | 1.16600992  | protein_coding | 8  | 20103676  | 20161474  | LZTS1   |
| ENSG00000061455 | 0.869158192 | 1.353254395 | protein_coding | 5  | 122424816 | 122523745 | PRDM6   |
| ENSG00000061656 | 7.596913151 | 8.443145654 | protein_coding | 20 | 34203814  | 34208971  | SPAG4   |
| ENSG00000061676 | 11.18120429 | 10.99901167 | protein_coding | 2  | 183789605 | 183903586 | NCKAP1  |
| ENSG00000061794 | 9.538571537 | 9.562335454 | protein_coding | 12 | 27863706  | 27909228  | MRPS35  |
| ENSG00000061918 | 3.950976309 | 6.934050347 | protein_coding | 4  | 156680144 | 156728743 | GUCY1B3 |
| ENSG00000061936 | 9.258993749 | 9.063247032 | protein_coding | 12 | 132195626 | 132284282 | SFSWAP  |
| ENSG00000061938 | 9.018059887 | 8.565427152 | protein_coding | 3  | 195590235 | 195638816 | TNK2    |
| ENSG00000061987 | 8.674235392 | 8.899098923 | protein_coding | 12 | 62860597  | 62991363  | MON2    |
| ENSG00000062038 | 10.21380859 | 6.668971382 | protein_coding | 16 | 68670092  | 68756519  | CDH3    |
| ENSG00000062194 | 9.441577455 | 9.290875744 | protein_coding | 5  | 56469775  | 56560505  | GPBP1   |
| ENSG00000062282 | 8.059349131 | 8.552341023 | protein_coding | 11 | 75470557  | 75512579  | DGAT2   |
| ENSG00000062370 | 6.798966424 | 7.329495501 | protein_coding | 19 | 44830706  | 44905774  | ZFP112  |
| ENSG00000062485 | 11.86103218 | 11.72932276 | protein_coding | 12 | 56665483  | 56694176  | CS      |
| ENSG00000062524 | 1.407729925 | 0.950786998 | protein_coding | 15 | 41795783  | 41806085  | LTK     |
| ENSG00000062582 | 11.16441632 | 11.37998908 | protein_coding | 7  | 43906157  | 43909492  | MRPS24  |
| ENSG00000062598 | 8.744039402 | 8.702045897 | protein_coding | 20 | 44994688  | 45061704  | ELMO2   |
| ENSG00000062650 | 9.791627126 | 9.848794614 | protein_coding | 10 | 88195013  | 88281572  | WAPAL   |
| ENSG00000062716 | 10.28483328 | 10.7926861  | protein_coding | 17 | 57784863  | 57917950  | VMP1    |
| ENSG00000062725 | 8.382430368 | 8.622319665 | protein_coding | 17 | 58520520  | 58603580  | APPBP2  |
| ENSG00000062822 | 9.842521827 | 9.943872684 | protein_coding | 19 | 50887593  | 50921270  | POLD1   |
| ENSG00000063015 | 1.616589159 | 2.334191469 | protein_coding | 17 | 27281919  | 27333458  | SEZ6    |
| ENSG00000063046 | 11.51058949 | 11.52176793 | protein_coding | 12 | 53399942  | 53435993  | EIF4B   |
| ENSG00000063127 | 5.158541613 | 4.976162367 | protein_coding | 19 | 49792897  | 49828474  | SLC6A16 |
| ENSG00000063169 | 8.362640485 | 7.95731437  | protein_coding | 19 | 48111453  | 48206534  | GLTSCR1 |
| ENSG00000063176 | 7.978913023 | 8.044860491 | protein_coding | 19 | 49122548  | 49133973  | SPHK2   |
| ENSG00000063177 | 12.04738372 | 12.46725444 | protein_coding | 19 | 49118585  | 49122793  | RPL18   |
| ENSG00000063180 | 5.331395195 | 6.673373662 | protein_coding | 19 | 49141272  | 49149451  | CA11    |
| ENSG00000063241 | 9.733978068 | 9.411071665 | protein_coding | 19 | 55964345  | 55973049  | ISOC2   |
| ENSG00000063244 | 11.77840425 | 11.66127838 | protein_coding | 19 | 56165416  | 56186081  | U2AF2   |
| ENSG00000063245 | 11.89195533 | 11.39605971 | protein_coding | 19 | 56186561  | 56207132  | EPN1    |
| ENSG00000063322 | 7.04004079  | 6.977419495 | protein_coding | 19 | 39881963  | 39891201  | MED29   |
| ENSG00000063438 | 7.08025234  | 7.724721747 | protein_coding | 5  | 304291    | 438406    | AHRR    |
| ENSG00000063587 | 8.265227794 | 8.450859136 | protein_coding | X  | 152599613 | 152618384 | ZNF275  |
| ENSG00000063601 | 9.142495894 | 8.977733605 | protein_coding | X  | 149861435 | 149933576 | MTMR1   |
| ENSG00000063660 | 11.24007313 | 9.43525094  | protein_coding | 2  | 241375088 | 241407493 | GPC1    |
| ENSG00000063761 | 7.781675404 | 7.971683681 | protein_coding | 14 | 78266426  | 78401355  | ADCK1   |
| ENSG00000063854 | 7.865879816 | 8.480051236 | protein_coding | 16 | 1845621   | 1877195   | HAGH    |
| ENSG00000063978 | 9.577332188 | 9.570029165 | protein_coding | 4  | 2463947   | 2627047   | RNF4    |
| ENSG00000064012 | 8.774313977 | 8.689060408 | protein_coding | 2  | 202098166 | 202152434 | CASP8   |
| ENSG00000064042 | 4.6658819   | 5.42565083  | protein_coding | 4  | 41361624  | 41702061  | LIMCH1  |
| ENSG00000064102 | 9.530531618 | 9.373010948 | protein_coding | 12 | 27058114  | 27091259  | ASUN    |

|                 |             |             |                |    |           |           |          |
|-----------------|-------------|-------------|----------------|----|-----------|-----------|----------|
| ENSG00000064115 | 9.05552222  | 8.797898671 | protein_coding | 12 | 27126128  | 27167367  | TM7SF3   |
| ENSG00000064195 | 6.32084526  | 3.368666104 | protein_coding | 17 | 48067369  | 48072588  | DLX3     |
| ENSG00000064199 | 5.538004898 | 5.759604001 | protein_coding | 11 | 124543694 | 124567414 | SPA17    |
| ENSG00000064201 | 2.928422289 | 3.32456471  | protein_coding | 11 | 2323227   | 2339430   | TSPAN32  |
| ENSG00000064205 | 6.163378456 | 6.24096575  | protein_coding | 20 | 43343485  | 43357150  | WISP2    |
| ENSG00000064225 | 2.762599152 | 4.048652948 | protein_coding | 3  | 98451080  | 98540045  | ST3GAL6  |
| ENSG00000064270 | 4.883502971 | 3.027231696 | protein_coding | 16 | 84402133  | 84497793  | ATP2C2   |
| ENSG00000064300 | 3.830412367 | 0.697730409 | protein_coding | 17 | 47572655  | 47592379  | NGFR     |
| ENSG00000064309 | 6.469548347 | 7.351639476 | protein_coding | 11 | 125825691 | 125933230 | CDON     |
| ENSG00000064313 | 9.021506037 | 8.591248608 | protein_coding | 8  | 120743015 | 120845103 | TAF2     |
| ENSG00000064393 | 10.4228399  | 9.757928543 | protein_coding | 7  | 139246316 | 139477577 | HIPK2    |
| ENSG00000064419 | 10.04854664 | 9.570029165 | protein_coding | 7  | 128594948 | 128695198 | TNPO3    |
| ENSG00000064490 | 8.954578658 | 9.111898978 | protein_coding | 19 | 19303008  | 19312678  | RFXANK   |
| ENSG00000064545 | 9.799008649 | 10.06399506 | protein_coding | 19 | 19229978  | 19249275  | TMEM161A |
| ENSG00000064547 | 8.257454839 | 6.637773454 | protein_coding | 19 | 19734468  | 19739739  | LPAR2    |
| ENSG00000064601 | 11.24548624 | 11.83195402 | protein_coding | 20 | 44519591  | 44527459  | CTSA     |
| ENSG00000064607 | 10.37918427 | 10.53924152 | protein_coding | 19 | 19101697  | 19144380  | SUGP2    |
| ENSG00000064651 | 7.797842652 | 7.786986696 | protein_coding | 5  | 127419458 | 127525380 | SLC12A2  |
| ENSG00000064652 | 7.388527525 | 7.560938532 | protein_coding | 5  | 122179134 | 122365049 | SNX24    |
| ENSG00000064666 | 11.56336037 | 11.24620466 | protein_coding | 19 | 1026580   | 1039063   | CNN2     |
| ENSG00000064687 | 9.230491154 | 9.139208113 | protein_coding | 19 | 1040102   | 1065571   | ABCA7    |
| ENSG00000064692 | 0           | 0.697730409 | protein_coding | 5  | 121647049 | 121799914 | SNCAIP   |
| ENSG00000064703 | 7.832262274 | 8.24888207  | protein_coding | 1  | 112297867 | 112310638 | DDX20    |
| ENSG00000064726 | 9.402463961 | 9.537194665 | protein_coding | 15 | 83685174  | 83736106  | BTBD1    |
| ENSG00000064763 | 1.799000381 | 2.242360793 | protein_coding | 12 | 29302036  | 29493913  | FAR2     |
| ENSG00000064835 | 0           | 0.390640832 | protein_coding | 3  | 87308554  | 87325737  | POU1F1   |
| ENSG00000064886 | 6.421663777 | 7.237355663 | protein_coding | 1  | 111743393 | 111786062 | CHI3L2   |
| ENSG00000064932 | 11.85557193 | 11.55748408 | protein_coding | 19 | 1107634   | 1174282   | SBNO2    |
| ENSG00000064933 | 8.041355121 | 8.269383236 | protein_coding | 2  | 190648811 | 190742355 | PMS1     |
| ENSG00000064961 | 10.65983832 | 10.9641779  | protein_coding | 19 | 3572775   | 3579086   | HMG20B   |
| ENSG00000064989 | 2.35979773  | 1.802319292 | protein_coding | 2  | 188207856 | 188313187 | CALCRL   |
| ENSG00000064995 | 8.063812784 | 8.440565301 | protein_coding | 6  | 34845555  | 34855866  | TAF11    |
| ENSG00000064999 | 9.413872751 | 8.930701228 | protein_coding | 6  | 34857038  | 35085317  | ANKS1A   |
| ENSG00000065000 | 12.34792747 | 12.13357684 | protein_coding | 19 | 2100993   | 2151556   | AP3D1    |
| ENSG00000065029 | 8.708847212 | 8.890616425 | protein_coding | 6  | 35226686  | 35263762  | ZNF76    |
| ENSG00000065054 | 8.779750834 | 7.76240224  | protein_coding | 16 | 2075357   | 2089027   | SLC9A3R2 |
| ENSG00000065057 | 7.985986001 | 7.950075687 | protein_coding | 16 | 2089816   | 2097867   | NTHL1    |
| ENSG00000065060 | 9.687008864 | 9.815822531 | protein_coding | 6  | 34759857  | 34850915  | UHRF1BP1 |
| ENSG00000065135 | 9.469601403 | 9.695451059 | protein_coding | 1  | 110091233 | 110136975 | GNAI3    |
| ENSG00000065150 | 11.75978288 | 11.60981212 | protein_coding | 13 | 98605742  | 98676551  | IPO5     |
| ENSG00000065154 | 10.82079098 | 11.00163984 | protein_coding | 10 | 126085872 | 126107545 | OAT      |
| ENSG00000065183 | 9.536164262 | 9.516516751 | protein_coding | 1  | 118472343 | 118503049 | WDR3     |
| ENSG00000065243 | 9.122309386 | 9.031020259 | protein_coding | 1  | 89149905  | 89301938  | PKN2     |
| ENSG00000065268 | 9.95852752  | 9.839520617 | protein_coding | 19 | 984328    | 994569    | WDR18    |
| ENSG00000065308 | 9.842521827 | 10.16201509 | protein_coding | 6  | 52362200  | 52441713  | TRAM2    |
| ENSG00000065320 | 9.381161578 | 9.317839931 | protein_coding | 17 | 8924859   | 9147317   | NTN1     |
| ENSG00000065325 | 5.512107582 | 6.544728831 | protein_coding | 17 | 9728868   | 9795419   | GLP2R    |
| ENSG00000065328 | 9.24628631  | 9.028445114 | protein_coding | 10 | 13203554  | 13253104  | MCM10    |
| ENSG00000065357 | 8.169068555 | 6.941369681 | protein_coding | 12 | 56321103  | 56347811  | DGKA     |
| ENSG00000065361 | 7.115078652 | 3.532712221 | protein_coding | 12 | 56473641  | 56497289  | ERBB3    |
| ENSG00000065413 | 3.911897206 | 4.250702764 | protein_coding | 2  | 197831741 | 198175897 | ANKRD44  |
| ENSG00000065427 | 11.61369821 | 11.52298807 | protein_coding | 16 | 75661622  | 75682541  | KARS     |
| ENSG00000065457 | 8.092494681 | 7.722599249 | protein_coding | 16 | 75630879  | 75657198  | ADAT1    |
| ENSG00000065485 | 9.019209518 | 8.875412173 | protein_coding | 3  | 122785909 | 122944074 | PDIA5    |
| ENSG00000065491 | 8.116326397 | 8.257703981 | protein_coding | 6  | 37225548  | 37300746  | TBC1D22B |
| ENSG00000065518 | 8.701704574 | 9.102951831 | protein_coding | 3  | 120315156 | 120321347 | NDUFB4   |
| ENSG00000065526 | 10.49278612 | 10.11302738 | protein_coding | 1  | 16174359  | 16266955  | SPEN     |
| ENSG00000065534 | 8.243750574 | 9.291591823 | protein_coding | 3  | 123328896 | 123603178 | MYLK     |
| ENSG00000065548 | 9.843171129 | 9.771851712 | protein_coding | 2  | 187350883 | 187374090 | ZC3H15   |
| ENSG00000065559 | 8.992533411 | 9.459031647 | protein_coding | 17 | 11924135  | 12047050  | MAP2K4   |
| ENSG00000065600 | 7.773523328 | 7.948260326 | protein_coding | 1  | 212537273 | 212588243 | TMEM206  |
| ENSG00000065613 | 9.968084123 | 10.05600976 | protein_coding | 10 | 105726959 | 105788991 | SLK      |
| ENSG00000065615 | 7.454602977 | 7.119700263 | protein_coding | 6  | 84569362  | 84670146  | CYB5R4   |

|                 |             |             |                |    |           |           |          |
|-----------------|-------------|-------------|----------------|----|-----------|-----------|----------|
| ENSG00000065618 | 10.39299681 | 6.403479675 | protein_coding | 10 | 105791044 | 105845760 | COL17A1  |
| ENSG00000065621 | 7.587643674 | 6.445267191 | protein_coding | 10 | 106028631 | 106059616 | GSTO2    |
| ENSG00000065665 | 6.887241849 | 6.959507185 | protein_coding | 10 | 12171636  | 12211960  | SEC61A2  |
| ENSG00000065675 | 0.499066092 | 0           | protein_coding | 10 | 6469105   | 6622263   | PRKCQ    |
| ENSG00000065717 | 6.509364082 | 6.223059835 | protein_coding | 19 | 2997637   | 3045786   | TLE2     |
| ENSG00000065802 | 8.851210906 | 8.535512415 | protein_coding | 2  | 239335383 | 239360891 | ASB1     |
| ENSG00000065809 | 9.818950204 | 9.145559356 | protein_coding | 10 | 14560556  | 14816896  | FAM107B  |
| ENSG00000065833 | 9.25411951  | 8.715982854 | protein_coding | 6  | 83920108  | 84140797  | ME1      |
| ENSG00000065882 | 9.710684602 | 9.378413761 | protein_coding | 4  | 37892708  | 38140796  | TBC1D1   |
| ENSG00000065883 | 9.486324422 | 9.353254373 | protein_coding | 7  | 39989636  | 40136733  | CDK13    |
| ENSG00000065911 | 10.55197078 | 10.58172296 | protein_coding | 2  | 74425689  | 74444692  | MTHFD2   |
| ENSG00000065923 | 7.976547636 | 6.799557986 | protein_coding | X  | 46464753  | 46618490  | SLC9A7   |
| ENSG00000065970 | 8.913126744 | 8.488819803 | protein_coding | 12 | 8185299   | 8208099   | FOXJ2    |
| ENSG00000065978 | 11.95908793 | 11.93443023 | protein_coding | 1  | 43148098  | 43168023  | YBX1     |
| ENSG00000065989 | 10.18592632 | 9.076603748 | protein_coding | 19 | 10527449  | 10580305  | PDE4A    |
| ENSG00000066027 | 7.997697782 | 7.819127564 | protein_coding | 1  | 212458782 | 212535200 | PPP2R5A  |
| ENSG00000066032 | 0           | 0.697730409 | protein_coding | 2  | 79412357  | 80875905  | CTNNA2   |
| ENSG00000066044 | 10.6929933  | 10.52621885 | protein_coding | 19 | 8023458   | 8070529   | ELAVL1   |
| ENSG00000066056 | 1.407729925 | 1.16600992  | protein_coding | 1  | 43766664  | 43788779  | TIE1     |
| ENSG00000066084 | 10.37739234 | 9.789195588 | protein_coding | 12 | 50898768  | 51142450  | DIP2B    |
| ENSG00000066117 | 10.09726068 | 9.80733523  | protein_coding | 12 | 50478755  | 50494495  | SMARCD1  |
| ENSG00000066135 | 8.600881464 | 8.70742221  | protein_coding | 1  | 44115829  | 44171186  | KDM4A    |
| ENSG00000066136 | 8.299696963 | 8.411872581 | protein_coding | 1  | 41157320  | 41237275  | NFYC     |
| ENSG00000066185 | 2.238690726 | 2.501982735 | protein_coding | 1  | 42896000  | 42921938  | ZMYND12  |
| ENSG00000066230 | 6.129712275 | 7.321103092 | protein_coding | 5  | 473425    | 524447    | SLC9A3   |
| ENSG00000066248 | 6.616550626 | 5.456629825 | protein_coding | 2  | 233743396 | 233877982 | NGEF     |
| ENSG00000066279 | 9.490475063 | 9.637486317 | protein_coding | 1  | 197053258 | 197115824 | ASPM     |
| ENSG00000066322 | 10.25830282 | 10.35352335 | protein_coding | 1  | 43829068  | 43833697  | ELOVL1   |
| ENSG00000066336 | 0.499066092 | 1.16600992  | protein_coding | 11 | 47376411  | 47400127  | SPI1     |
| ENSG00000066379 | 6.328285199 | 6.862599506 | protein_coding | 6  | 30026676  | 30032686  | ZNRD1    |
| ENSG00000066405 | 1.407729925 | 1.667587519 | protein_coding | 3  | 137717577 | 137752494 | CLDN18   |
| ENSG00000066422 | 8.717371959 | 8.381252713 | protein_coding | 3  | 101367733 | 101396339 | ZBTB11   |
| ENSG00000066427 | 7.521034145 | 6.57327766  | protein_coding | 14 | 92524896  | 92572965  | ATXN3    |
| ENSG00000066455 | 9.606690509 | 8.775550005 | protein_coding | 14 | 93260576  | 93306308  | GOLGA5   |
| ENSG00000066468 | 3.004694206 | 2.334191469 | protein_coding | 10 | 123237848 | 123357972 | FGFR2    |
| ENSG00000066557 | 7.549958459 | 7.799123587 | protein_coding | 1  | 70610488  | 70671303  | LRRC40   |
| ENSG00000066583 | 7.55947245  | 7.563312496 | protein_coding | 5  | 128430386 | 128449721 | ISOC1    |
| ENSG00000066629 | 8.320363082 | 7.465168131 | protein_coding | 14 | 100204030 | 100408397 | EML1     |
| ENSG00000066651 | 6.941611359 | 7.138927266 | protein_coding | 6  | 126307576 | 126360937 | TRMT11   |
| ENSG00000066654 | 9.25411951  | 9.373010948 | protein_coding | 16 | 20744986  | 20753406  | THUMPDP1 |
| ENSG00000066697 | 8.730065371 | 9.02758571  | protein_coding | 9  | 103189438 | 103213511 | C9orf30  |
| ENSG00000066735 | 3.077135474 | 3.679994897 | protein_coding | 14 | 104605060 | 104647231 | KIF26A   |
| ENSG00000066739 | 9.285033801 | 8.543951256 | protein_coding | 14 | 96747595  | 96830207  | ATG2B    |
| ENSG00000066777 | 9.487986111 | 8.7455513   | protein_coding | 8  | 68085747  | 68255912  | ARFGEF1  |
| ENSG00000066827 | 7.246540262 | 7.093659051 | protein_coding | 8  | 135490031 | 135725292 | ZFAT     |
| ENSG00000066855 | 9.10941293  | 8.679244009 | protein_coding | 8  | 66556124  | 66683496  | MTFR1    |
| ENSG00000066923 | 5.512107582 | 5.306006045 | protein_coding | 7  | 99775186  | 99819111  | STAG3    |
| ENSG00000066926 | 7.993024472 | 7.9428005   | protein_coding | 18 | 55215515  | 55254004  | FECH     |
| ENSG00000066933 | 8.227927477 | 7.964516916 | protein_coding | 15 | 72114632  | 72410918  | MYO9A    |
| ENSG00000067048 | 0.499066092 | 0.697730409 | protein_coding | Y  | 15016019  | 15032390  | DDX3Y    |
| ENSG00000067057 | 12.40324164 | 11.86948799 | protein_coding | 10 | 3109712   | 3179904   | PFKP     |
| ENSG00000067064 | 9.06334524  | 7.720473624 | protein_coding | 10 | 1085848   | 1095110   | IDI1     |
| ENSG00000067066 | 9.450127191 | 9.568848185 | protein_coding | 2  | 231280657 | 231408805 | SP100    |
| ENSG00000067082 | 12.23594806 | 10.83284173 | protein_coding | 10 | 3818188   | 3827473   | KLF6     |
| ENSG00000067113 | 6.155035276 | 6.136428444 | protein_coding | 5  | 54720682  | 54830878  | PPAP2A   |
| ENSG00000067141 | 8.741255403 | 8.987489278 | protein_coding | 15 | 73344051  | 73597547  | NEO1     |
| ENSG00000067167 | 9.803686393 | 9.759999733 | protein_coding | 8  | 71485677  | 71520622  | TRAM1    |
| ENSG00000067177 | 9.24628631  | 9.29015931  | protein_coding | X  | 71798664  | 71934167  | PHKA1    |
| ENSG00000067182 | 10.47781173 | 9.881981209 | protein_coding | 12 | 6437923   | 6451280   | TNFRSF1A |
| ENSG00000067191 | 7.491518048 | 7.198175438 | protein_coding | 17 | 37329709  | 37353902  | CACNB1   |
| ENSG00000067208 | 8.577659618 | 8.657187659 | protein_coding | 1  | 92974253  | 93257961  | EVI5     |
| ENSG00000067221 | 6.777386522 | 7.607691112 | protein_coding | 15 | 74275547  | 74286963  | STOML1   |
| ENSG00000067225 | 14.78403844 | 14.72602368 | protein_coding | 15 | 72491370  | 72524164  | PKM2     |

|                 |             |             |                |    |           |           |         |
|-----------------|-------------|-------------|----------------|----|-----------|-----------|---------|
| ENSG00000067248 | 9.200400892 | 9.014632836 | protein_coding | 5  | 54552073  | 54603550  | DHX29   |
| ENSG00000067334 | 9.478823042 | 9.644229954 | protein_coding | 1  | 94333373  | 94345474  | DNNTIP2 |
| ENSG00000067365 | 7.803191723 | 7.909600377 | protein_coding | 16 | 8715540   | 8740081   | METTL22 |
| ENSG00000067369 | 9.372191905 | 9.126421125 | protein_coding | 15 | 43699407  | 43802926  | TP53BP1 |
| ENSG00000067445 | 0.499066092 | 0.697730409 | protein_coding | X  | 54946895  | 54957864  | TRO     |
| ENSG00000067533 | 8.223944437 | 8.259169069 | protein_coding | 1  | 218458629 | 218511325 | RRP15   |
| ENSG00000067560 | 12.02180189 | 12.02720851 | protein_coding | 3  | 49396578  | 49450431  | RHOA    |
| ENSG00000067596 | 9.235445742 | 8.954409067 | protein_coding | 17 | 41561331  | 41604154  | DHX8    |
| ENSG00000067601 | 3.603959378 | 3.570966319 | pseudogene     | 7  | 66752528  | 66767894  | PMS2P4  |
| ENSG00000067606 | 6.428602508 | 5.361622823 | protein_coding | 1  | 1981909   | 2116834   | PRKCZ   |
| ENSG00000067646 | 0.869158192 | 0           | protein_coding | Y  | 2803112   | 2850547   | ZFY     |
| ENSG00000067704 | 11.08264807 | 11.20954246 | protein_coding | 1  | 220267444 | 220321380 | IARS2   |
| ENSG00000067715 | 5.869093502 | 5.059245468 | protein_coding | 12 | 79257773  | 79845788  | SYT1    |
| ENSG00000067798 | 8.422952257 | 8.534302826 | protein_coding | 12 | 78224685  | 78606790  | NAV3    |
| ENSG00000067829 | 9.962118669 | 10.14745308 | protein_coding | X  | 153051221 | 153059978 | IDH3G   |
| ENSG00000067836 | 7.066972635 | 7.408200217 | protein_coding | 16 | 4846969   | 4852951   | ROGDI   |
| ENSG00000067840 | 0.869158192 | 0.390640832 | protein_coding | X  | 153067621 | 153096020 | PDZD4   |
| ENSG00000067842 | 0           | 0.390640832 | protein_coding | X  | 152783134 | 152848397 | ATP2B3  |
| ENSG00000067900 | 9.349520666 | 9.398495997 | protein_coding | 18 | 18529701  | 18691812  | ROCK1   |
| ENSG00000067955 | 9.449274494 | 9.303711094 | protein_coding | 16 | 67063019  | 67134961  | CBFB    |
| ENSG00000067992 | 6.922076877 | 7.41347308  | protein_coding | X  | 24483338  | 24557954  | PKD3    |
| ENSG00000068001 | 8.173205795 | 8.076782959 | protein_coding | 3  | 50355221  | 50360337  | HYAL2   |
| ENSG00000068024 | 8.274885464 | 7.911465009 | protein_coding | 2  | 239969864 | 240323348 | HDAC4   |
| ENSG00000068028 | 7.933293789 | 8.394645624 | protein_coding | 3  | 50367219  | 50378411  | RASSF1  |
| ENSG00000068078 | 5.525114348 | 4.841813558 | protein_coding | 4  | 1795034   | 1810599   | FGFR3   |
| ENSG00000068079 | 8.364450825 | 9.444295206 | protein_coding | 17 | 41158742  | 41166473  | IFI35   |
| ENSG00000068097 | 8.753741308 | 8.950786969 | protein_coding | 17 | 58120562  | 58156292  | HEATR6  |
| ENSG00000068120 | 10.74499215 | 10.25600002 | protein_coding | 17 | 40714092  | 40718295  | COASY   |
| ENSG00000068137 | 8.414239457 | 7.644032061 | protein_coding | 17 | 40819935  | 40829048  | PLEKHH3 |
| ENSG00000068305 | 8.000028772 | 8.116121984 | protein_coding | 15 | 100017370 | 100256671 | MEF2A   |
| ENSG00000068308 | 9.836012692 | 9.893819392 | protein_coding | X  | 48779305  | 48815648  | OTUD5   |
| ENSG00000068323 | 10.43581223 | 10.7182091  | protein_coding | X  | 48886242  | 48901012  | TFE3    |
| ENSG00000068354 | 8.858936753 | 8.833738534 | protein_coding | X  | 48397845  | 48420997  | TBC1D25 |
| ENSG00000068366 | 11.08895774 | 11.02206322 | protein_coding | X  | 108872579 | 108976632 | ACSL4   |
| ENSG00000068383 | 7.64536895  | 7.307006333 | protein_coding | 10 | 134351324 | 134596984 | INPP5A  |
| ENSG00000068394 | 8.646233023 | 8.793860943 | protein_coding | X  | 48970334  | 48980151  | GPKOW   |
| ENSG00000068400 | 8.880604615 | 9.178452256 | protein_coding | X  | 48830134  | 48858675  | GRIPAP1 |
| ENSG00000068438 | 10.3350898  | 10.36275233 | protein_coding | X  | 48334541  | 48344752  | FTSJ1   |
| ENSG00000068489 | 9.575770339 | 8.883034329 | protein_coding | 17 | 57233101  | 57279924  | PRR11   |
| ENSG00000068650 | 9.2686931   | 8.554729165 | protein_coding | 13 | 113344643 | 113541482 | ATP11A  |
| ENSG00000068654 | 10.89186426 | 10.7764079  | protein_coding | 2  | 86247339  | 86333278  | POLR1A  |
| ENSG00000068697 | 10.1782276  | 10.42640534 | protein_coding | 2  | 20232411  | 20251789  | LAPTM4A |
| ENSG00000068724 | 9.479658457 | 8.859080135 | protein_coding | 2  | 47143296  | 47303276  | TTC7A   |
| ENSG00000068745 | 8.360827871 | 8.414504719 | protein_coding | 3  | 48725436  | 48777786  | IP6K2   |
| ENSG00000068784 | 7.194570056 | 7.655203404 | protein_coding | 2  | 45615819  | 45839304  | SRBD1   |
| ENSG00000068793 | 11.0436345  | 10.74093244 | protein_coding | 15 | 22892005  | 23006016  | CYFIP1  |
| ENSG00000068796 | 8.875535495 | 8.898158883 | protein_coding | 5  | 61601989  | 61833076  | KIF2A   |
| ENSG00000068831 | 1.799000381 | 1.353254395 | protein_coding | 11 | 64494383  | 64512928  | RASGRP2 |
| ENSG00000068878 | 10.46268027 | 10.28217725 | protein_coding | 2  | 54091204  | 54197977  | PSME4   |
| ENSG00000068885 | 6.814942123 | 7.012590419 | protein_coding | 3  | 159974774 | 160117668 | IFT80   |
| ENSG00000068903 | 7.985986001 | 8.492561507 | protein_coding | 19 | 39369197  | 39390502  | SIRT2   |
| ENSG00000068912 | 8.626755466 | 8.894392583 | protein_coding | 2  | 54014181  | 54045956  | ERLEC1  |
| ENSG00000068971 | 7.938164312 | 8.608592853 | protein_coding | 11 | 64685025  | 64701947  | PPP2R5B |
| ENSG00000068976 | 3.274897671 | 2.652276565 | protein_coding | 11 | 64513861  | 64527769  | PYGM    |
| ENSG00000069011 | 9.342189974 | 8.564242397 | protein_coding | 5  | 134362615 | 134370503 | PITX1   |
| ENSG00000069020 | 7.416718478 | 6.948652068 | protein_coding | 5  | 65892176  | 66465423  | MAST4   |
| ENSG00000069122 | 2.238690726 | 0           | protein_coding | 6  | 46820249  | 46922680  | GPR116  |
| ENSG00000069188 | 1.616589159 | 1.518964905 | protein_coding | 17 | 71330523  | 71640227  | SDK2    |
| ENSG00000069248 | 9.565576897 | 9.748571216 | protein_coding | 1  | 229577044 | 229644103 | NUP133  |
| ENSG00000069275 | 12.01519088 | 11.80675339 | protein_coding | 1  | 205681947 | 205719404 | NUCKS1  |
| ENSG00000069329 | 10.45760098 | 10.90644604 | protein_coding | 16 | 46690819  | 46723430  | VPS35   |
| ENSG00000069345 | 9.544172939 | 9.8994674   | protein_coding | 16 | 46989299  | 47007699  | DNAJA2  |
| ENSG00000069399 | 10.48739661 | 10.38808288 | protein_coding | 19 | 45250962  | 45263301  | BCL3    |



|                 |             |             |                |    |           |           |            |
|-----------------|-------------|-------------|----------------|----|-----------|-----------|------------|
| ENSG00000069424 | 8.697401955 | 8.799913305 | protein_coding | 1  | 6051526   | 6161253   | KCNAB2     |
| ENSG00000069431 | 2.671945279 | 2.721932731 | protein_coding | 12 | 21950335  | 22094336  | ABCC9      |
| ENSG00000069493 | 5.360713447 | 4.917990497 | protein_coding | 12 | 9809270   | 9848413   | CLEC2D     |
| ENSG00000069509 | 6.820228284 | 7.129345795 | protein_coding | X  | 44382885  | 44402247  | FUNDC1     |
| ENSG00000069535 | 1.16343121  | 0.390640832 | protein_coding | X  | 43625858  | 43741693  | MAOB       |
| ENSG00000069667 | 1.407729925 | 2.242360793 | protein_coding | 15 | 60780483  | 61521518  | RORA       |
| ENSG00000069696 | 3.78787645  | 2.721932731 | protein_coding | 11 | 637293    | 640706    | DRD4       |
| ENSG00000069702 | 7.049074049 | 6.287656023 | protein_coding | 1  | 92145902  | 92371892  | TGFB3      |
| ENSG00000069712 | 4.734682531 | 4.990346085 | protein_coding | 1  | 92632542  | 92650280  | KIAA1107   |
| ENSG00000069812 | 5.91922012  | 4.127774132 | protein_coding | 1  | 6472478   | 6484730   | HES2       |
| ENSG00000069849 | 10.31557114 | 10.65784121 | protein_coding | 3  | 141594966 | 141645356 | ATP1B3     |
| ENSG00000069869 | 8.114176072 | 8.289597152 | protein_coding | 15 | 56119120  | 56285944  | NEDD4      |
| ENSG00000069943 | 6.733233509 | 6.495854971 | protein_coding | 15 | 55611158  | 55647846  | PIGB       |
| ENSG00000069956 | 9.104005195 | 9.040423325 | protein_coding | 15 | 52244303  | 52358462  | MAPK6      |
| ENSG00000069966 | 7.630400601 | 7.237355663 | protein_coding | 15 | 52413117  | 52483566  | GNB5       |
| ENSG00000069974 | 8.474152153 | 8.53672099  | protein_coding | 15 | 55495164  | 55611311  | RAB27A     |
| ENSG00000069998 | 8.560389515 | 8.38394126  | protein_coding | 22 | 17618401  | 17646177  | CECR5      |
| ENSG00000070010 | 9.956728588 | 10.27856981 | protein_coding | 22 | 19437464  | 19466738  | UFD1L      |
| ENSG00000070018 | 9.712107084 | 9.663720744 | protein_coding | 12 | 12268959  | 12419946  | LRP6       |
| ENSG00000070019 | 0.869158192 | 0.697730409 | protein_coding | 12 | 14765576  | 14849519  | GUCY2C     |
| ENSG00000070031 | 1.799000381 | 0.390640832 | protein_coding | 11 | 626431    | 627143    | SCT        |
| ENSG00000070047 | 9.622662143 | 9.329741599 | protein_coding | 11 | 576486    | 612222    | PHRF1      |
| ENSG00000070061 | 9.866992122 | 9.909298518 | protein_coding | 9  | 111629797 | 111696396 | IKBKAP     |
| ENSG00000070081 | 9.27062517  | 9.812832711 | protein_coding | 11 | 17229700  | 17371521  | NUCB2      |
| ENSG00000070087 | 8.646233023 | 8.765275934 | protein_coding | 3  | 149682691 | 149768575 | PFN2       |
| ENSG00000070159 | 8.179389493 | 7.225413142 | protein_coding | 9  | 112137974 | 112260593 | PTPN3      |
| ENSG00000070182 | 7.666067113 | 7.452416987 | protein_coding | 14 | 65213002  | 65346601  | SPTB       |
| ENSG00000070190 | 5.270908378 | 5.792353798 | protein_coding | 4  | 100737990 | 100791311 | DAPP1      |
| ENSG00000070214 | 10.25000281 | 9.496780665 | protein_coding | 9  | 108006903 | 108201452 | SLC44A1    |
| ENSG00000070269 | 7.30049066  | 8.026050991 | protein_coding | 14 | 56955072  | 57117324  | C14orf101  |
| ENSG00000070366 | 9.664408419 | 10.21242219 | protein_coding | 17 | 1963133   | 2207069   | SMG6       |
| ENSG00000070367 | 10.07973621 | 10.26696498 | protein_coding | 14 | 57670518  | 57735726  | EXOC5      |
| ENSG00000070371 | 7.68357507  | 7.95731437  | protein_coding | 22 | 19166986  | 19279239  | CLTCL1     |
| ENSG00000070388 | 0.869158192 | 1.16600992  | protein_coding | 19 | 639926    | 643703    | FGF22      |
| ENSG00000070404 | 10.23721557 | 10.44519147 | protein_coding | 19 | 676389    | 683392    | FSTL3      |
| ENSG00000070413 | 10.09997975 | 10.12553154 | protein_coding | 22 | 19023795  | 19109967  | DGCR2      |
| ENSG00000070423 | 9.834707333 | 9.87244022  | protein_coding | 19 | 647530    | 663233    | RNF126     |
| ENSG00000070444 | 10.05079697 | 9.636359306 | protein_coding | 17 | 2287354   | 2304412   | MNT        |
| ENSG00000070476 | 8.016241092 | 8.449576416 | protein_coding | 3  | 126156444 | 126194762 | ZXDC       |
| ENSG00000070495 | 8.507303029 | 8.578395649 | protein_coding | 17 | 74708919  | 74722866  | JMJD6      |
| ENSG00000070501 | 6.771940731 | 6.624193585 | protein_coding | 8  | 42195972  | 42229326  | POLB       |
| ENSG00000070540 | 7.395627075 | 7.825075067 | protein_coding | 17 | 66417423  | 66453653  | WIPI1      |
| ENSG00000070601 | 0.499066092 | 0.390640832 | protein_coding | 9  | 37650997  | 37746901  | FRMPD1     |
| ENSG00000070610 | 8.433338631 | 8.68797299  | protein_coding | 9  | 35736863  | 35749983  | GBA2       |
| ENSG00000070614 | 10.72081773 | 10.49142535 | protein_coding | 5  | 149865381 | 149937773 | NDST1      |
| ENSG00000070669 | 10.6572561  | 10.55751618 | protein_coding | 7  | 97481430  | 97501854  | ASNS       |
| ENSG00000070718 | 8.311006074 | 8.886830358 | protein_coding | 8  | 42010464  | 42029191  | AP3M2      |
| ENSG00000070729 | 3.603959378 | 3.453019579 | protein_coding | 16 | 57917503  | 58005020  | CNGB1      |
| ENSG00000070731 | 5.795854912 | 4.385599336 | protein_coding | 17 | 74561461  | 74582145  | ST6GALNAC2 |
| ENSG00000070756 | 13.22593694 | 13.21984726 | protein_coding | 8  | 101698044 | 101735037 | PABPC1     |
| ENSG00000070759 | 4.734682531 | 5.404622322 | protein_coding | 1  | 45809555  | 45956872  | TESK2      |
| ENSG00000070761 | 8.118473522 | 8.832754911 | protein_coding | 16 | 58147496  | 58163354  | C16orf80   |
| ENSG00000070770 | 10.12635891 | 10.028782   | protein_coding | 16 | 58191811  | 58231824  | CSNK2A2    |
| ENSG00000070778 | 8.068262669 | 8.18248514  | protein_coding | 14 | 88932122  | 89021077  | PTPN21     |
| ENSG00000070785 | 8.251597515 | 8.34031144  | protein_coding | 1  | 45316450  | 45452282  | EIF2B3     |
| ENSG00000070808 | 2.35979773  | 1.518964905 | protein_coding | 5  | 149599054 | 149669854 | CAMK2A     |
| ENSG00000070814 | 10.84335951 | 10.53410706 | protein_coding | 5  | 149737202 | 149779870 | TCOF1      |
| ENSG00000070831 | 10.71266873 | 10.59309496 | protein_coding | 1  | 22379120  | 22419437  | CDC42      |
| ENSG00000070882 | 9.30213633  | 8.749726325 | protein_coding | 7  | 24836158  | 25021253  | OSBPL3     |
| ENSG00000070886 | 1.960915222 | 1.16600992  | protein_coding | 1  | 22890057  | 22930087  | EPHA8      |
| ENSG00000070950 | 8.267164507 | 8.151264044 | protein_coding | 3  | 8817088   | 9005457   | RAD18      |
| ENSG00000070961 | 11.15738502 | 10.93101216 | protein_coding | 12 | 89981828  | 90103077  | ATP2B1     |
| ENSG00000071051 | 7.945439403 | 7.093659051 | protein_coding | 2  | 106361354 | 106510730 | NCK2       |

|                 |             |             |                |    |           |           |          |
|-----------------|-------------|-------------|----------------|----|-----------|-----------|----------|
| ENSG00000071054 | 12.04808789 | 11.31191436 | protein_coding | 2  | 102313312 | 102508449 | MAP4K4   |
| ENSG00000071073 | 5.695874189 | 4.676215056 | protein_coding | 2  | 99235569  | 99347589  | MGAT4A   |
| ENSG00000071082 | 11.45177601 | 11.74313081 | protein_coding | 2  | 101618177 | 101640494 | RPL31    |
| ENSG00000071127 | 11.85573283 | 11.80813028 | protein_coding | 4  | 10075963  | 10118573  | WDR1     |
| ENSG00000071189 | 8.558809206 | 8.639296529 | protein_coding | 7  | 17832466  | 17980130  | SNX13    |
| ENSG00000071205 | 7.821758815 | 7.913327235 | protein_coding | 4  | 148653214 | 148993931 | ARHGAP10 |
| ENSG00000071242 | 9.561637084 | 9.774927587 | protein_coding | 6  | 166822852 | 167319939 | RPS6KA2  |
| ENSG00000071243 | 6.9512803   | 7.012590419 | protein_coding | 7  | 120590803 | 120617270 | ING3     |
| ENSG00000071246 | 5.512107582 | 6.450406542 | protein_coding | 14 | 77228532  | 77249354  | VASH1    |
| ENSG00000071282 | 6.738827102 | 6.59664425  | protein_coding | 3  | 8543393   | 8609805   | LMCD1    |
| ENSG00000071462 | 9.821588372 | 9.321350625 | protein_coding | 7  | 73097355  | 73119491  | WBSCR22  |
| ENSG00000071537 | 11.00440756 | 10.53531681 | protein_coding | 14 | 81937893  | 82000205  | SEL1L    |
| ENSG00000071539 | 10.33046639 | 10.05600976 | protein_coding | 5  | 892758    | 919472    | TRIP13   |
| ENSG00000071553 | 10.60116605 | 11.09340543 | protein_coding | X  | 153656978 | 153664862 | ATP6AP1  |
| ENSG00000071564 | 11.54392161 | 11.25669407 | protein_coding | 19 | 1609293   | 1652326   | TCF3     |
| ENSG00000071575 | 8.011627561 | 6.995112131 | protein_coding | 2  | 12857015  | 12882860  | TRIB2    |
| ENSG00000071626 | 11.08895774 | 10.94609939 | protein_coding | 19 | 1407584   | 1435683   | DAZAP1   |
| ENSG00000071655 | 11.18274414 | 11.36288594 | protein_coding | 19 | 1576678   | 1592710   | MBD3     |
| ENSG00000071794 | 9.77334709  | 9.412389065 | protein_coding | 3  | 148747914 | 148804341 | HLTF     |
| ENSG00000071859 | 10.41761813 | 10.59164201 | protein_coding | X  | 153672473 | 153679002 | FAM50A   |
| ENSG00000071889 | 9.135091581 | 9.402479116 | protein_coding | X  | 153733350 | 153744566 | FAM3A    |
| ENSG00000071894 | 10.10323589 | 9.995767095 | protein_coding | 8  | 145618444 | 145634753 | CPSF1    |
| ENSG00000071909 | 0.869158192 | 1.353254395 | protein_coding | 2  | 171034655 | 171511662 | MYO3B    |
| ENSG00000071967 | 5.498982484 | 4.075511708 | protein_coding | 2  | 172378757 | 172414643 | CYBRD1   |
| ENSG00000071994 | 8.799958495 | 9.188483253 | protein_coding | 6  | 170884383 | 170893780 | PDCD2    |
| ENSG00000072042 | 10.49567985 | 10.33696907 | protein_coding | 14 | 68143518  | 68162531  | RDH11    |
| ENSG00000072062 | 10.82210899 | 10.54795834 | protein_coding | 19 | 14202509  | 14228574  | PRKACA   |
| ENSG00000072071 | 10.52753755 | 10.16475361 | protein_coding | 19 | 14258547  | 14316972  | LPHN1    |
| ENSG00000072110 | 13.77550477 | 14.1956816  | protein_coding | 14 | 69340860  | 69446157  | ACTN1    |
| ENSG00000072121 | 9.543374069 | 10.2319528  | protein_coding | 14 | 68194091  | 68283307  | ZFYVE26  |
| ENSG00000072133 | 2.57521082  | 0           | protein_coding | X  | 83318984  | 83442933  | RPS6KA6  |
| ENSG00000072134 | 9.304024157 | 8.85617872  | protein_coding | 17 | 19140690  | 19240028  | EPN2     |
| ENSG00000072135 | 9.320904342 | 8.989255971 | protein_coding | 2  | 131113580 | 131132982 | PTPN18   |
| ENSG00000072163 | 2.928422289 | 2.144285137 | protein_coding | 2  | 128395956 | 128439360 | LIMS2    |
| ENSG00000072182 | 3.744048221 | 2.788380093 | protein_coding | 2  | 220378892 | 220403494 | ACCN4    |
| ENSG00000072195 | 7.990682129 | 9.738102504 | protein_coding | 2  | 220299568 | 220363009 | SPEG     |
| ENSG00000072201 | 2.762599152 | 1.353254395 | protein_coding | 4  | 54325468  | 54567572  | LNX1     |
| ENSG00000072210 | 9.634713422 | 9.130429247 | protein_coding | 17 | 19551459  | 19580909  | ALDH3A2  |
| ENSG00000072274 | 12.84577052 | 12.57962489 | protein_coding | 3  | 195754054 | 195809060 | TFRC     |
| ENSG00000072310 | 11.76972141 | 11.47556657 | protein_coding | 17 | 17714653  | 17740325  | SREBF1   |
| ENSG00000072315 | 0           | 0.390640832 | protein_coding | X  | 111017543 | 111326004 | TRPC5    |
| ENSG00000072364 | 10.07808233 | 9.937023818 | protein_coding | 5  | 132211071 | 132299326 | AFF4     |
| ENSG00000072401 | 8.103376106 | 7.91704449  | protein_coding | 10 | 60094735  | 60129403  | UBE2D1   |
| ENSG00000072415 | 10.10918645 | 10.30150311 | protein_coding | 14 | 67707826  | 67802536  | MPP5     |
| ENSG00000072422 | 5.550781289 | 5.886365696 | protein_coding | 10 | 62629196  | 62761198  | RHOBTB1  |
| ENSG00000072501 | 11.23042696 | 11.45956588 | protein_coding | X  | 53401070  | 53449677  | SMC1A    |
| ENSG00000072506 | 9.761030438 | 10.20027059 | protein_coding | X  | 53458206  | 53461320  | HSD17B10 |
| ENSG00000072518 | 10.00742874 | 9.67034314  | protein_coding | 11 | 63606400  | 63678491  | MARK2    |
| ENSG00000072571 | 8.508940744 | 8.529454305 | protein_coding | 5  | 162887175 | 162918947 | HMMR     |
| ENSG00000072609 | 8.096857104 | 8.171634445 | protein_coding | 12 | 133416937 | 133485772 | CHFR     |
| ENSG00000072682 | 9.373091386 | 9.737577069 | protein_coding | 5  | 131527531 | 131631008 | P4HA2    |
| ENSG00000072736 | 8.700271793 | 8.68797299  | protein_coding | 16 | 68111243  | 68263162  | NFATC3   |
| ENSG00000072756 | 7.621344476 | 7.898361689 | protein_coding | 3  | 3168600   | 3192563   | TRNT1    |
| ENSG00000072778 | 12.22253612 | 12.95924873 | protein_coding | 17 | 7120444   | 7128587   | ACADVL   |
| ENSG00000072786 | 9.815645694 | 9.611339686 | protein_coding | 5  | 171469077 | 171615390 | STK10    |
| ENSG00000072803 | 8.999540089 | 8.887777807 | protein_coding | 5  | 171288553 | 171433877 | FBXW11   |
| ENSG00000072818 | 5.141750194 | 6.037446454 | protein_coding | 17 | 7239848   | 7254797   | ACAP1    |
| ENSG00000072832 | 6.236372259 | 6.737844962 | protein_coding | 4  | 5749811   | 5894785   | CRMP1    |
| ENSG00000072840 | 8.407231133 | 9.10783897  | protein_coding | 4  | 5712924   | 5830772   | EVC      |
| ENSG00000072849 | 8.331511968 | 9.218164439 | protein_coding | 17 | 5374571   | 5389537   | DERL2    |
| ENSG00000072858 | 1.960915222 | 0.950786998 | protein_coding | 3  | 113251143 | 113348425 | SIDT1    |
| ENSG00000072864 | 8.555643385 | 8.176294739 | protein_coding | 16 | 15737124  | 15820210  | NDE1     |
| ENSG00000072952 | 0.869158192 | 2.144285137 | protein_coding | 11 | 10594638  | 10715535  | MRV11    |

|                 |             |             |                |    |           |           |          |
|-----------------|-------------|-------------|----------------|----|-----------|-----------|----------|
| ENSG00000072954 | 6.103936836 | 5.187895122 | protein_coding | 19 | 16771938  | 16799814  | TMEM38A  |
| ENSG00000072958 | 10.66609026 | 10.73594288 | protein_coding | 19 | 16308665  | 16346156  | AP1M1    |
| ENSG00000073008 | 11.53811874 | 11.29219179 | protein_coding | 19 | 45147098  | 45169429  | PVR      |
| ENSG00000073009 | 7.757079669 | 7.789016615 | protein_coding | X  | 153769414 | 153796782 | IKBKKG   |
| ENSG00000073050 | 8.428154791 | 8.036341107 | protein_coding | 19 | 44047464  | 44079730  | XRCC1    |
| ENSG00000073060 | 11.15398732 | 11.36458839 | protein_coding | 12 | 125261606 | 125367214 | SCARB1   |
| ENSG00000073067 | 4.568725997 | 3.081239798 | protein_coding | 7  | 1022835   | 1029276   | CYP2W1   |
| ENSG00000073111 | 11.32944272 | 11.14543121 | protein_coding | 3  | 127317066 | 127341276 | MCM2     |
| ENSG00000073146 | 1.407729925 | 1.802319292 | protein_coding | 22 | 50528308  | 50600119  | MOV10L1  |
| ENSG00000073150 | 7.367016815 | 6.064512706 | protein_coding | 22 | 50609160  | 50618723  | PANX2    |
| ENSG00000073169 | 9.27736711  | 9.381780274 | protein_coding | 22 | 50639408  | 50656045  |          |
| ENSG00000073282 | 8.362640485 | 5.620622115 | protein_coding | 3  | 189349205 | 189615068 | TP63     |
| ENSG00000073331 | 7.35977471  | 7.756190105 | protein_coding | 4  | 113206665 | 113363776 | ALPK1    |
| ENSG00000073350 | 7.08903805  | 4.17820932  | protein_coding | 17 | 73521783  | 73571289  | LLGL2    |
| ENSG00000073417 | 8.875535495 | 9.082408649 | protein_coding | 15 | 85523671  | 85682376  | PDE8A    |
| ENSG00000073464 | 7.22677265  | 7.743685008 | protein_coding | X  | 10125024  | 10205700  | CLCN4    |
| ENSG00000073536 | 8.360827871 | 8.282410365 | protein_coding | 17 | 33458366  | 33469322  | NLE1     |
| ENSG00000073578 | 11.36627314 | 11.33745188 | protein_coding | 5  | 218356    | 256815    | SDHA     |
| ENSG00000073584 | 9.308732943 | 9.120790981 | protein_coding | 17 | 38781214  | 38821393  | SMARCE1  |
| ENSG00000073598 | 3.830412367 | 3.081239798 | protein_coding | 17 | 33448650  | 33457751  | FNDC8    |
| ENSG00000073605 | 7.72361917  | 7.646273261 | protein_coding | 17 | 38060848  | 38077313  | GSDMB    |
| ENSG00000073614 | 9.364975797 | 9.077434451 | protein_coding | 12 | 389223    | 498620    | KDM5A    |
| ENSG00000073670 | 4.261916566 | 3.64455972  | protein_coding | 17 | 42836568  | 42859214  | ADAM11   |
| ENSG00000073711 | 7.811178326 | 7.836897019 | protein_coding | 3  | 135684515 | 135866733 | PPP2R3A  |
| ENSG00000073712 | 9.966893004 | 10.59193272 | protein_coding | 14 | 53323986  | 53419153  | FERMT2   |
| ENSG00000073737 | 1.799000381 | 0.390640832 | protein_coding | 2  | 169921299 | 169952677 | DHRS9    |
| ENSG00000073754 | 1.960915222 | 0.950786998 | protein_coding | 1  | 157800704 | 157868046 | CD5L     |
| ENSG00000073756 | 3.830412367 | 4.810179682 | protein_coding | 1  | 186640923 | 186649559 | PTGS2    |
| ENSG00000073792 | 10.05304379 | 9.414362912 | protein_coding | 3  | 185361527 | 185542844 | IGF2BP2  |
| ENSG00000073803 | 8.137655191 | 7.600774083 | protein_coding | 3  | 185000729 | 185206885 | MAP3K13  |
| ENSG00000073849 | 8.646233023 | 8.365015357 | protein_coding | 3  | 186648274 | 186796341 | STGAL1   |
| ENSG00000073905 | 2.928422289 | 2.721932731 | pseudogene     | X  | 80184999  | 80185845  | VDAC1P1  |
| ENSG00000073910 | 0           | 2.501982735 | protein_coding | 13 | 32605437  | 32870794  | FRY      |
| ENSG00000073921 | 11.30160288 | 11.34333464 | protein_coding | 11 | 85668727  | 85780924  | PICALM   |
| ENSG00000073969 | 8.694526397 | 8.720244202 | protein_coding | 17 | 44668075  | 44834830  | NSF      |
| ENSG00000074047 | 5.929039784 | 5.709041716 | protein_coding | 2  | 121493199 | 121750229 | GLI2     |
| ENSG00000074054 | 9.681936396 | 9.271406033 | protein_coding | 2  | 122095354 | 122407163 | CLASP1   |
| ENSG00000074071 | 9.940436455 | 10.1004139  | protein_coding | 16 | 1821891   | 1823156   | MRPS34   |
| ENSG00000074181 | 6.25990527  | 2.851901313 | protein_coding | 19 | 15270445  | 15311792  | NOTCH3   |
| ENSG00000074201 | 10.03098657 | 10.36207072 | protein_coding | 11 | 77225981  | 77348850  | CLNS1A   |
| ENSG00000074211 | 2.57521082  | 2.501982735 | protein_coding | 4  | 6322305   | 6565327   | PPP2R2C  |
| ENSG00000074219 | 9.012297947 | 9.008548131 | protein_coding | 19 | 49843857  | 49865714  | TEAD2    |
| ENSG00000074266 | 8.391336806 | 8.635917101 | protein_coding | 11 | 85955586  | 85989781  | EED      |
| ENSG00000074276 | 2.847891871 | 3.570966319 | protein_coding | 5  | 175969512 | 176022975 | CDHR2    |
| ENSG00000074319 | 8.984315711 | 9.338084052 | protein_coding | 11 | 18489883  | 18548779  | TSG101   |
| ENSG00000074356 | 8.455589162 | 9.01636662  | protein_coding | 17 | 3714460   | 3749540   | C17orf85 |
| ENSG00000074370 | 6.84118134  | 6.799557986 | protein_coding | 17 | 3822869   | 3867736   | ATP2A3   |
| ENSG00000074410 | 9.237422823 | 8.992782879 | protein_coding | 15 | 63613577  | 63674360  | CA12     |
| ENSG00000074416 | 10.05584741 | 9.172244489 | protein_coding | 3  | 127407909 | 127558019 | MGLL     |
| ENSG00000074527 | 8.094677541 | 6.682138126 | protein_coding | 12 | 96051583  | 96184930  | NTN4     |
| ENSG00000074582 | 8.426422697 | 8.666050705 | protein_coding | 2  | 219523487 | 219528166 | BCS1L    |
| ENSG00000074590 | 6.456028446 | 6.843193319 | protein_coding | 12 | 106457118 | 106533811 | NUAK1    |
| ENSG00000074603 | 8.393111514 | 8.245929405 | protein_coding | 15 | 65734801  | 65810042  | DPP8     |
| ENSG00000074621 | 6.897280837 | 7.255086103 | protein_coding | 15 | 65903704  | 65953333  | SLC24A1  |
| ENSG00000074657 | 8.910650905 | 8.797898671 | protein_coding | 18 | 56529832  | 56653712  | ZNF532   |
| ENSG00000074660 | 3.502389126 | 3.608232228 | protein_coding | 17 | 1537152   | 1549042   | SCARF1   |
| ENSG00000074695 | 11.34029198 | 11.25962481 | protein_coding | 18 | 56995055  | 57026503  | LMAN1    |
| ENSG00000074696 | 10.25830282 | 10.29008203 | protein_coding | 15 | 65822756  | 65870687  | PTPLAD1  |
| ENSG00000074706 | 0.869158192 | 0.697730409 | protein_coding | 6  | 154475631 | 154677926 | IPCEF1   |
| ENSG00000074755 | 10.02927581 | 10.24716765 | protein_coding | 17 | 3907739   | 4046314   | ZZEF1    |
| ENSG00000074771 | 0.499066092 | 0           | protein_coding | 6  | 155716504 | 155777037 | NOX3     |
| ENSG00000074800 | 14.91898157 | 14.85875419 | protein_coding | 1  | 8921061   | 8939308   | ENO1     |
| ENSG00000074803 | 0           | 0.697730409 | protein_coding | 15 | 48483861  | 48596275  | SLC12A1  |

|                 |             |             |                |    |           |           |           |
|-----------------|-------------|-------------|----------------|----|-----------|-----------|-----------|
| ENSG00000074842 | 10.56580525 | 10.83308768 | protein_coding | 19 | 4657566   | 4670415   | C19orf10  |
| ENSG00000074855 | 8.794597401 | 8.601680156 | protein_coding | 19 | 17434032  | 17445638  | ANO8      |
| ENSG00000074935 | 6.846372398 | 7.454976247 | protein_coding | 6  | 112391861 | 112408716 | TUBE1     |
| ENSG00000074964 | 7.840089987 | 8.138583935 | protein_coding | 1  | 17866330  | 18024369  | ARHGEF10L |
| ENSG00000074966 | 3.004694206 | 3.532712221 | protein_coding | 4  | 48068410  | 48136273  | TXK       |
| ENSG00000075035 | 3.146112541 | 0           | protein_coding | 12 | 108523248 | 108644314 | WSCD2     |
| ENSG00000075043 | 5.81716234  | 7.129345795 | protein_coding | 20 | 62037542  | 62103993  | KCNQ2     |
| ENSG00000075073 | 3.652182994 | 3.133298822 | protein_coding | 10 | 71163659  | 71176623  | TACR2     |
| ENSG00000075089 | 6.970425921 | 7.472765069 | protein_coding | 12 | 100592900 | 100635643 | ACTR6     |
| ENSG00000075131 | 7.1740722   | 7.188980716 | protein_coding | 15 | 66628544  | 66679084  | TIPIN     |
| ENSG00000075142 | 9.548160668 | 9.55995988  | protein_coding | 7  | 87834433  | 87856308  | SRI       |
| ENSG00000075151 | 9.040880241 | 9.075772566 | protein_coding | 1  | 21132972  | 21503377  | EIF4G3    |
| ENSG00000075188 | 7.888702948 | 7.758263791 | protein_coding | 12 | 102467967 | 102513902 | NUP37     |
| ENSG00000075213 | 8.888175056 | 8.635917101 | protein_coding | 7  | 83587659  | 84122040  | SEMA3A    |
| ENSG00000075218 | 9.168633912 | 9.248723012 | protein_coding | 22 | 46692638  | 46726707  | GTSE1     |
| ENSG00000075223 | 9.941649609 | 9.113519788 | protein_coding | 7  | 80371854  | 80551675  | SEMA3C    |
| ENSG00000075234 | 8.133414584 | 8.481307156 | protein_coding | 22 | 46663858  | 46689905  | TTC38     |
| ENSG00000075239 | 10.21431058 | 10.59512663 | protein_coding | 11 | 107992243 | 108018503 | ACAT1     |
| ENSG00000075240 | 9.100750797 | 9.097229165 | protein_coding | 22 | 46971909  | 47075688  | GRAMD4    |
| ENSG00000075275 | 10.28817515 | 9.174575533 | protein_coding | 22 | 46756731  | 46933067  | CELSR1    |
| ENSG00000075290 | 0.499066092 | 1.518964905 | protein_coding | 10 | 102222798 | 102243501 | WNT8B     |
| ENSG00000075292 | 9.624929439 | 9.94751216  | protein_coding | 2  | 71503691  | 71662199  | ZNF638    |
| ENSG00000075303 | 7.494827594 | 7.173524745 | protein_coding | 7  | 87462883  | 87505672  | SLC25A40  |
| ENSG00000075336 | 7.64536895  | 8.424985509 | protein_coding | 18 | 71815746  | 71826197  | TIMM21    |
| ENSG00000075391 | 9.144604451 | 9.267043514 | protein_coding | 1  | 178062864 | 178448644 | RASAL2    |
| ENSG00000075399 | 7.281453427 | 7.087074634 | protein_coding | 16 | 89773542  | 89787394  | C16orf7   |
| ENSG00000075407 | 8.497437504 | 9.351881826 | protein_coding | 10 | 38383264  | 38412276  | ZNF37A    |
| ENSG00000075413 | 10.61377804 | 9.974965329 | protein_coding | 14 | 103851701 | 103970168 | MARK3     |
| ENSG00000075415 | 11.7274412  | 11.69333284 | protein_coding | 12 | 98987369  | 98995946  | SLC25A3   |
| ENSG00000075420 | 11.17063773 | 11.04729845 | protein_coding | 3  | 171757418 | 172119455 | FNDC3B    |
| ENSG00000075426 | 11.38489919 | 11.35125567 | protein_coding | 2  | 28615315  | 28640179  | FOSL2     |
| ENSG00000075461 | 2.238690726 | 0.950786998 | protein_coding | 17 | 64961013  | 65029518  | CACNG4    |
| ENSG00000075539 | 9.308732943 | 9.257545892 | protein_coding | 4  | 48499378  | 48782339  | FRYL      |
| ENSG00000075568 | 9.687008864 | 9.412389065 | protein_coding | 2  | 98372799  | 98612388  | TMEM131   |
| ENSG00000075618 | 12.94710098 | 10.81527095 | protein_coding | 7  | 5632439   | 5646286   | FSCN1     |
| ENSG00000075624 | 16.54663365 | 16.10672433 | protein_coding | 7  | 5566782   | 5603415   | ACTB      |
| ENSG00000075643 | 9.03179537  | 8.706348549 | protein_coding | 18 | 33767482  | 33852120  | MOCOS     |
| ENSG00000075651 | 8.528449672 | 8.540340653 | protein_coding | 3  | 171318195 | 171528740 | PLD1      |
| ENSG00000075702 | 9.023798905 | 8.802929991 | protein_coding | 19 | 36545783  | 36596012  | WDR62     |
| ENSG00000075711 | 10.02126533 | 9.489309466 | protein_coding | 3  | 196769431 | 197026171 | DLG1      |
| ENSG00000075785 | 11.40416813 | 10.98047916 | protein_coding | 3  | 128444965 | 128533639 | RAB7A     |
| ENSG00000075790 | 8.799958495 | 8.658298522 | protein_coding | 7  | 107220422 | 107269615 | BCAP29    |
| ENSG00000075826 | 5.707331524 | 6.695185789 | protein_coding | 10 | 102246399 | 102289628 | SEC31B    |
| ENSG00000075856 | 9.361354163 | 9.340162149 | protein_coding | 12 | 108916357 | 108955176 | SART3     |
| ENSG00000075884 | 0           | 0.697730409 | protein_coding | 2  | 143848931 | 144525921 | ARHGAP15  |
| ENSG00000075886 | 3.211941663 | 2.652276565 | protein_coding | 2  | 132233666 | 132240507 | TUBA3D    |
| ENSG00000075891 | 1.799000381 | 1.518964905 | protein_coding | 10 | 102495360 | 102589698 | PAX2      |
| ENSG00000075914 | 8.245716314 | 8.120964787 | protein_coding | 3  | 45016733  | 45077558  | EXOSC7    |
| ENSG00000075945 | 6.979904289 | 7.472765069 | protein_coding | 1  | 169890467 | 170054349 | KIFAP3    |
| ENSG00000075975 | 8.447071828 | 8.256237404 | protein_coding | 3  | 12598513  | 12625212  | MKRN2     |
| ENSG00000076003 | 10.59809193 | 10.47355103 | protein_coding | 2  | 136597196 | 136633996 | MCM6      |
| ENSG00000076043 | 9.003030709 | 9.422231406 | protein_coding | 11 | 114310108 | 114321001 | REXO2     |
| ENSG00000076053 | 7.959880444 | 8.251828705 | protein_coding | 11 | 114270752 | 114284925 | RBM7      |
| ENSG00000076067 | 8.227927477 | 7.807158493 | protein_coding | 12 | 56915713  | 56984745  | RBMS2     |
| ENSG00000076108 | 11.08704033 | 10.61728821 | protein_coding | 12 | 56989380  | 57030600  | BAZ2A     |
| ENSG00000076201 | 10.25147099 | 10.1498245  | protein_coding | 3  | 47422501  | 47454931  | PTPN23    |
| ENSG00000076242 | 9.161362874 | 9.380434611 | protein_coding | 3  | 37034823  | 37107380  | MLH1      |
| ENSG00000076248 | 9.600559263 | 9.330438649 | protein_coding | 12 | 109535379 | 109548797 | UNG       |
| ENSG00000076258 | 2.671945279 | 2.579085888 | protein_coding | 1  | 171283347 | 171311223 | FMO4      |
| ENSG00000076321 | 6.882196036 | 7.20731193  | protein_coding | 1  | 173684080 | 173755840 | KLHL20    |
| ENSG00000076344 | 5.207774174 | 4.342020395 | protein_coding | 16 | 318300    | 325980    | RGS11     |
| ENSG00000076351 | 7.266040677 | 6.376734172 | protein_coding | 17 | 26721661  | 26733228  | SLC46A1   |
| ENSG00000076356 | 9.131906634 | 8.159132889 | protein_coding | 1  | 208195587 | 208417665 | PLXNA2    |

|                 |             |             |                |    |           |           |          |
|-----------------|-------------|-------------|----------------|----|-----------|-----------|----------|
| ENSG00000076382 | 9.777429384 | 9.450079579 | protein_coding | 17 | 26904608  | 26926297  | SPAG5    |
| ENSG00000076513 | 9.822247161 | 9.719065235 | protein_coding | 12 | 110436991 | 110477568 | ANKRD13A |
| ENSG00000076554 | 9.971651591 | 10.12673589 | protein_coding | 8  | 80870571  | 81143467  | TPD52    |
| ENSG00000076555 | 5.588445295 | 5.784235782 | protein_coding | 12 | 109554400 | 109706031 | ACACB    |
| ENSG00000076604 | 9.671006391 | 9.116755954 | protein_coding | 17 | 27071036  | 27077974  | TRAF4    |
| ENSG00000076641 | 6.442380648 | 7.012590419 | protein_coding | 8  | 81882526  | 82024303  | PAG1     |
| ENSG00000076650 | 7.119373418 | 6.966698819 | protein_coding | 19 | 33571786  | 33621318  | GPATCH1  |
| ENSG00000076662 | 7.530740159 | 7.813155441 | protein_coding | 19 | 10444454  | 10450345  | ICAM3    |
| ENSG00000076685 | 9.767201908 | 9.870045082 | protein_coding | 10 | 104845940 | 104953056 | NT5C2    |
| ENSG00000076706 | 9.613557158 | 10.69620416 | protein_coding | 11 | 119179241 | 119191799 | MCAM     |
| ENSG00000076716 | 5.672682881 | 3.081239798 | protein_coding | X  | 132434131 | 132549518 | GPC4     |
| ENSG00000076770 | 5.538004898 | 2.420525079 | protein_coding | X  | 131503345 | 131623996 | MBNL3    |
| ENSG00000076826 | 7.618313091 | 5.871116342 | protein_coding | 19 | 7660788   | 7683194   | CAMSAP3  |
| ENSG00000076864 | 7.590740122 | 6.699508919 | protein_coding | 1  | 21922708  | 21995856  | RAP1GAP  |
| ENSG00000076924 | 9.578112479 | 9.695451059 | protein_coding | 19 | 7684412   | 7694451   | XAB2     |
| ENSG00000076928 | 8.911889356 | 9.108651887 | protein_coding | 19 | 42387267  | 42411597  | ARHGEF1  |
| ENSG00000076944 | 10.79685863 | 10.46151059 | protein_coding | 19 | 7701991   | 7712759   | STXBP2   |
| ENSG00000076984 | 9.786910053 | 9.820791836 | protein_coding | 19 | 7968728   | 7979363   | MAP2K7   |
| ENSG00000077009 | 2.238690726 | 2.039052734 | protein_coding | 19 | 3933101   | 3942412   | ITGB1BP3 |
| ENSG00000077044 | 10.57560642 | 9.770824962 | protein_coding | 2  | 234263153 | 234380750 | DGKD     |
| ENSG00000077080 | 1.799000381 | 1.353254395 | protein_coding | 7  | 100240720 | 100254084 | ACTL6B   |
| ENSG00000077092 | 1.16343121  | 0.390640832 | protein_coding | 3  | 25215823  | 25639423  | RARB     |
| ENSG00000077097 | 10.77932387 | 10.88833484 | protein_coding | 3  | 25639475  | 25706398  | TOP2B    |
| ENSG00000077147 | 10.98659239 | 11.17270185 | protein_coding | 10 | 98277866  | 98347209  | TM9SF3   |
| ENSG00000077150 | 10.90746982 | 11.32596348 | protein_coding | 10 | 104154229 | 104162281 | NFKB2    |
| ENSG00000077152 | 7.933293789 | 8.409235632 | protein_coding | 1  | 202300785 | 202311108 | UBE2T    |
| ENSG00000077157 | 6.956090577 | 7.026422172 | protein_coding | 1  | 202317827 | 202557697 | PPP1R12B |
| ENSG00000077232 | 10.6991035  | 10.74668835 | protein_coding | 2  | 183580999 | 183653542 | DNAJC10  |
| ENSG00000077235 | 10.90031222 | 10.89376853 | protein_coding | 16 | 27470876  | 27561251  | GTF3C1   |
| ENSG00000077238 | 10.18797239 | 9.792234745 | protein_coding | 16 | 27324989  | 27376099  | IL4R     |
| ENSG00000077254 | 8.632776617 | 8.76011133  | protein_coding | 1  | 78161672  | 78225537  | USP33    |
| ENSG00000077312 | 10.01378699 | 9.775439595 | protein_coding | 19 | 41256759  | 41271296  | SNRPA    |
| ENSG00000077348 | 8.158673248 | 8.598211347 | protein_coding | 19 | 41892281  | 41903256  | EXOSC5   |
| ENSG00000077380 | 9.454383134 | 9.329741599 | protein_coding | 2  | 172543919 | 172604930 | DYNC1I2  |
| ENSG00000077420 | 0           | 0.950786998 | protein_coding | 10 | 26726706  | 26856732  | APBB1IP  |
| ENSG00000077454 | 8.971306859 | 8.601680156 | protein_coding | 7  | 100169855 | 100183776 | LRCH4    |
| ENSG00000077458 | 7.37062428  | 7.803146634 | protein_coding | 11 | 95502106  | 95523573  | FAM76B   |
| ENSG00000077463 | 8.768856552 | 8.864865519 | protein_coding | 19 | 4174106   | 4182596   | SIRT6    |
| ENSG00000077514 | 8.318496529 | 8.736113084 | protein_coding | 11 | 74204896  | 74380162  | POLD3    |
| ENSG00000077522 | 0.499066092 | 0.950786998 | protein_coding | 1  | 236849754 | 236927931 | ACTN2    |
| ENSG00000077549 | 10.93909487 | 10.87788257 | protein_coding | 1  | 19665267  | 19812066  | CAPZB    |
| ENSG00000077616 | 3.146112541 | 2.652276565 | protein_coding | 11 | 89864683  | 89926062  | NAALAD2  |
| ENSG00000077684 | 8.849919232 | 8.924251218 | protein_coding | 4  | 129730779 | 129796379 | PHF17    |
| ENSG00000077713 | 8.462367008 | 8.282410365 | protein_coding | X  | 118533023 | 118588441 | SLC25A43 |
| ENSG00000077721 | 9.500388149 | 10.04925084 | protein_coding | X  | 118708501 | 118718381 | UBE2A    |
| ENSG00000077782 | 8.66984994  | 8.467431533 | protein_coding | 8  | 38268656  | 38326352  | FGFR1    |
| ENSG00000077800 | 1.16343121  | 1.925536307 | protein_coding | 7  | 72742167  | 72772634  | FKBP6    |
| ENSG00000077809 | 10.74533954 | 10.44744231 | protein_coding | 7  | 74071994  | 74175026  | GTF2I    |
| ENSG00000077935 | 7.916116295 | 7.848622884 | protein_coding | 22 | 45739944  | 45809500  | SMC1B    |
| ENSG00000077942 | 6.892270075 | 6.799557986 | protein_coding | 22 | 45898118  | 45997015  | FBLN1    |
| ENSG00000077984 | 1.616589159 | 1.518964905 | protein_coding | 20 | 24929866  | 24940564  | CST7     |
| ENSG00000078018 | 2.847891871 | 3.411459265 | protein_coding | 2  | 210288782 | 210598842 | MAP2     |
| ENSG00000078043 | 7.666067113 | 7.994732806 | protein_coding | 18 | 44392060  | 44497468  | PIAS2    |
| ENSG00000078053 | 1.407729925 | 2.420525079 | protein_coding | 7  | 38423305  | 38671167  | AMPH     |
| ENSG00000078061 | 10.37155313 | 10.35283736 | protein_coding | X  | 47420516  | 47431307  | ARAF     |
| ENSG00000078070 | 7.868433623 | 8.587754596 | protein_coding | 3  | 182733006 | 182833863 | MCCC1    |
| ENSG00000078081 | 5.346128795 | 5.767861411 | protein_coding | 3  | 182840001 | 182881627 | LAMP3    |
| ENSG00000078098 | 0.499066092 | 0.697730409 | protein_coding | 2  | 163027194 | 163101661 | FAP      |
| ENSG00000078114 | 4.999881834 | 3.64455972  | protein_coding | 10 | 21068902  | 21463116  | NEBL     |
| ENSG00000078124 | 8.375265417 | 8.282410365 | protein_coding | 11 | 76571911  | 76737841  | ACER3    |
| ENSG00000078140 | 9.827506672 | 9.768769266 | protein_coding | 4  | 39699664  | 39784412  | UBE2K    |
| ENSG00000078142 | 8.074911866 | 8.8288137   | protein_coding | 18 | 39535171  | 39667794  | PIK3C3   |
| ENSG00000078177 | 6.449220685 | 6.660126317 | protein_coding | 4  | 40058446  | 40159872  | N4BP2    |

|                 |             |             |                |    |           |           |          |
|-----------------|-------------|-------------|----------------|----|-----------|-----------|----------|
| ENSG00000078237 | 7.498129565 | 7.421346415 | protein_coding | 12 | 4430371   | 4462338   | C12orf5  |
| ENSG00000078246 | 8.668385155 | 8.352716275 | protein_coding | 12 | 2986389   | 3050306   | TULP3    |
| ENSG00000078269 | 8.965354743 | 8.862939634 | protein_coding | 6  | 158402888 | 158520208 | SYNJ2    |
| ENSG00000078295 | 0.499066092 | 0           | protein_coding | 5  | 7396321   | 7830194   | ADCY2    |
| ENSG00000078304 | 10.45037457 | 9.4622154   | protein_coding | 14 | 102228135 | 102394326 | PPP2R5C  |
| ENSG00000078319 | 5.090170488 | 4.810179682 | pseudogene     | 7  | 99918615  | 99939531  | PMS2P1   |
| ENSG00000078369 | 11.85541103 | 11.66570416 | protein_coding | 1  | 1716725   | 1822502   | GNB1     |
| ENSG00000078399 | 1.16343121  | 2.039052734 | protein_coding | 7  | 27202057  | 27209269  | HOXA9    |
| ENSG00000078401 | 6.738827102 | 7.281279771 | protein_coding | 6  | 12290596  | 12297427  | EDN1     |
| ENSG00000078403 | 8.851210906 | 8.38394126  | protein_coding | 10 | 21823094  | 22032559  | MLLT10   |
| ENSG00000078487 | 4.77879189  | 6.110690132 | protein_coding | 7  | 99998449  | 100026615 | ZCWPW1   |
| ENSG00000078618 | 10.85789018 | 10.86374712 | protein_coding | 1  | 52254863  | 52344477  | NRD1     |
| ENSG00000078668 | 9.310612162 | 9.874831389 | protein_coding | 8  | 42249142  | 42263415  | VDAC3    |
| ENSG00000078674 | 9.354994343 | 9.804327751 | protein_coding | 8  | 17780349  | 17887453  | PCM1     |
| ENSG00000078687 | 6.393570237 | 6.963107483 | protein_coding | 17 | 76000249  | 76104916  | TNRC6C   |
| ENSG00000078699 | 8.620709081 | 8.801925129 | protein_coding | 20 | 32077881  | 32237842  | CBFA2T2  |
| ENSG00000078747 | 10.25635417 | 9.804829433 | protein_coding | 20 | 32951041  | 33099198  | ITCH     |
| ENSG00000078795 | 1.960915222 | 0.697730409 | protein_coding | 5  | 137223657 | 137278436 | PKD2L2   |
| ENSG00000078804 | 8.655134734 | 8.454700467 | protein_coding | 20 | 33292094  | 33301243  | TP53INP2 |
| ENSG00000078808 | 10.63230386 | 11.10098272 | protein_coding | 1  | 1152288   | 1167411   | SDF4     |
| ENSG00000078814 | 4.543379137 | 5.361622823 | protein_coding | 20 | 33563206  | 33590240  | MYH7B    |
| ENSG00000078900 | 2.671945279 | 3.32456471  | protein_coding | 1  | 3569084   | 3652765   | TP73     |
| ENSG00000078902 | 9.168633912 | 9.630144961 | protein_coding | 11 | 1295601   | 1330884   | TOLLIP   |
| ENSG00000078967 | 6.554468172 | 6.554308016 | protein_coding | 7  | 43966037  | 43993166  | UBE2D4   |
| ENSG00000079101 | 0.869158192 | 0           | protein_coding | 18 | 596998    | 650334    | CLUL1    |
| ENSG00000079102 | 0.499066092 | 0           | protein_coding | 8  | 92967203  | 93115514  | RUNX1T1  |
| ENSG00000079112 | 0           | 0.950786998 | protein_coding | 8  | 95139399  | 95229531  | CDH17    |
| ENSG00000079134 | 7.824391858 | 7.978815021 | protein_coding | 18 | 214527    | 268059    | THOC1    |
| ENSG00000079150 | 5.346128795 | 5.583678991 | protein_coding | 2  | 179328391 | 179343327 | FKBP7    |
| ENSG00000079156 | 7.584540566 | 7.460081189 | protein_coding | 2  | 179059208 | 179264160 | OSBPL6   |
| ENSG00000079215 | 0.869158192 | 2.652276565 | protein_coding | 5  | 36606457  | 36688436  | SLC1A3   |
| ENSG00000079246 | 11.87014001 | 11.8484726  | protein_coding | 2  | 216972187 | 217071026 | XRCC5    |
| ENSG00000079257 | 5.054730169 | 5.361622823 | protein_coding | 3  | 158363611 | 158390482 | LXN      |
| ENSG00000079263 | 3.950976309 | 4.710890357 | protein_coding | 2  | 231090444 | 231223762 | SP140    |
| ENSG00000079277 | 8.027710784 | 7.830998152 | protein_coding | 1  | 47023090  | 47082515  | MKKNK1   |
| ENSG00000079308 | 6.998676229 | 7.167295693 | protein_coding | 2  | 218664512 | 218867718 | TNS1     |
| ENSG00000079313 | 10.068119   | 9.881505655 | protein_coding | 19 | 1815245   | 1848452   | REXO1    |
| ENSG00000079332 | 10.25098176 | 9.906963845 | protein_coding | 10 | 71909960  | 71930279  | SAR1A    |
| ENSG00000079335 | 5.40360309  | 5.150490275 | protein_coding | 1  | 100810584 | 100985833 | CDC14A   |
| ENSG00000079337 | 4.543379137 | 4.127774132 | protein_coding | 12 | 48128455  | 48164823  | RAPGEF3  |
| ENSG00000079385 | 3.502389126 | 2.501982735 | protein_coding | 19 | 43011458  | 43032661  | CEACAM1  |
| ENSG00000079387 | 8.043616684 | 8.098224647 | protein_coding | 12 | 48436681  | 48500091  | SENP1    |
| ENSG00000079393 | 1.16343121  | 0.697730409 | protein_coding | 10 | 76854190  | 76868976  | DUSP13   |
| ENSG00000079432 | 9.106170722 | 8.796890297 | protein_coding | 19 | 42788817  | 42799949  | CIC      |
| ENSG00000079435 | 4.999881834 | 5.717592784 | protein_coding | 19 | 42905666  | 42931578  | LIPE     |
| ENSG00000079459 | 10.70732926 | 9.744915802 | protein_coding | 8  | 11653082  | 11696818  | FDFT1    |
| ENSG00000079462 | 6.9512803   | 7.113233895 | protein_coding | 19 | 42801185  | 42806929  | PAFAH1B3 |
| ENSG00000079482 | 6.47626108  | 6.977419495 | protein_coding | X  | 67262186  | 67653755  | OPHN1    |
| ENSG00000079616 | 10.07310926 | 10.32931774 | protein_coding | 16 | 29801499  | 29816706  | KIF22    |
| ENSG00000079689 | 0.499066092 | 0           | protein_coding | 6  | 25652464  | 25702011  | SCGN     |
| ENSG00000079691 | 9.159278686 | 8.449576416 | protein_coding | 6  | 25279306  | 25620758  | LRRC16A  |
| ENSG00000079739 | 10.08303831 | 9.961079008 | protein_coding | 1  | 64058916  | 64125916  | PGM1     |
| ENSG00000079785 | 10.47822979 | 10.12512987 | protein_coding | 2  | 15731302  | 15771225  | DDX1     |
| ENSG00000079805 | 12.12191655 | 12.10636339 | protein_coding | 19 | 10824143  | 10942586  | DNM2     |
| ENSG00000079819 | 10.97715801 | 11.12347869 | protein_coding | 6  | 131160487 | 131384462 | EPB41L2  |
| ENSG00000079841 | 0.499066092 | 0           | protein_coding | 6  | 72596406  | 73112845  | RIMS1    |
| ENSG00000079931 | 1.16343121  | 2.334191469 | protein_coding | 6  | 132617194 | 132722684 | MOXD1    |
| ENSG00000079950 | 7.947856304 | 8.41318925  | protein_coding | 6  | 132779054 | 132834337 | STX7     |
| ENSG00000079974 | 7.440941622 | 7.73528765  | protein_coding | 22 | 51205929  | 51222091  | RABL2B   |
| ENSG00000079999 | 10.94303755 | 11.29540842 | protein_coding | 19 | 10596796  | 10614054  | KEAP1    |
| ENSG00000080007 | 1.799000381 | 1.16600992  | protein_coding | 6  | 74104471  | 74127292  | DDX43    |
| ENSG00000080031 | 6.766474304 | 6.376734172 | protein_coding | 19 | 55692618  | 55720874  | PTPRH    |
| ENSG00000080166 | 0.499066092 | 0.390640832 | protein_coding | 13 | 95090830  | 95131936  | DCT      |

|                 |             |             |                |    |           |           |          |
|-----------------|-------------|-------------|----------------|----|-----------|-----------|----------|
| ENSG00000080189 | 9.396283191 | 9.478029618 | protein_coding | 20 | 44978167  | 44993043  | SLC35C2  |
| ENSG00000080200 | 7.026383958 | 6.926693689 | protein_coding | 3  | 97595819  | 97663810  | CRYBG3   |
| ENSG00000080224 | 2.10647801  | 3.232099092 | protein_coding | 3  | 96533425  | 97471304  | EPHA6    |
| ENSG00000080298 | 4.165528823 | 3.813624741 | protein_coding | 9  | 3218297   | 3526004   | RFX3     |
| ENSG00000080345 | 10.00858687 | 9.738627748 | protein_coding | 2  | 152266397 | 152364527 | RIF1     |
| ENSG00000080371 | 8.585441838 | 8.119352325 | protein_coding | 12 | 72148654  | 72184699  | RAB21    |
| ENSG00000080493 | 2.57521082  | 1.16600992  | protein_coding | 4  | 72053003  | 72437804  | SLC4A4   |
| ENSG00000080503 | 7.618313091 | 4.42790041  | protein_coding | 9  | 2015342   | 2193624   | SMARCA2  |
| ENSG00000080511 | 0.499066092 | 0           | protein_coding | 19 | 10123925  | 10132954  | RDH8     |
| ENSG00000080546 | 5.270908378 | 5.593003837 | protein_coding | 6  | 109307640 | 109416022 | SESN1    |
| ENSG00000080561 | 6.204385613 | 6.970281236 | protein_coding | X  | 107068985 | 107170423 | MID2     |
| ENSG00000080572 | 0           | 0.390640832 | protein_coding | X  | 106449862 | 106487473 | CXorf41  |
| ENSG00000080573 | 2.671945279 | 1.353254395 | protein_coding | 19 | 10070237  | 10121147  | COL5A3   |
| ENSG00000080603 | 11.5901033  | 11.66293964 | protein_coding | 16 | 30709530  | 30755602  | SRCAP    |
| ENSG00000080608 | 8.12275821  | 8.058387721 | protein_coding | 9  | 2720469   | 2844241   | KIAA0020 |
| ENSG00000080618 | 0           | 0.697730409 | protein_coding | 13 | 46627321  | 46679161  | CPB2     |
| ENSG00000080644 | 2.847891871 | 1.925536307 | protein_coding | 15 | 78885394  | 78913637  | CHRNA3   |
| ENSG00000080802 | 8.536501169 | 8.17939326  | protein_coding | 7  | 135046547 | 135194875 | CNOT4    |
| ENSG00000080815 | 10.26558692 | 10.29972451 | protein_coding | 14 | 73603126  | 73690399  | PSEN1    |
| ENSG00000080819 | 8.426422697 | 8.667154767 | protein_coding | 3  | 98239976  | 98312567  | CPOX     |
| ENSG00000080822 | 8.485841807 | 8.827826712 | protein_coding | 3  | 98216756  | 98241910  | CLDND1   |
| ENSG00000080823 | 7.878603882 | 6.815578497 | protein_coding | 14 | 102690837 | 102771537 | MOK      |
| ENSG00000080824 | 13.92513574 | 13.14955249 | protein_coding | 14 | 102547106 | 102606036 | HSP90AA1 |
| ENSG00000080839 | 8.838241835 | 9.107025596 | protein_coding | 20 | 35624752  | 35724398  | RBL1     |
| ENSG00000080845 | 11.53068103 | 11.74417745 | protein_coding | 20 | 34894258  | 35157040  | DLGAP4   |
| ENSG00000080854 | 4.437288965 | 4.932754837 | protein_coding | 11 | 133785185 | 133826880 | IGSF9B   |
| ENSG00000080894 | 4.352265886 | 4.42790041  | pseudogene     | 1  | 16793931  | 16819196  | CROCCP3  |
| ENSG00000080986 | 8.002356002 | 8.475016594 | protein_coding | 18 | 2571510   | 2616634   | NDC80    |
| ENSG00000081014 | 7.6689999   | 7.869875863 | protein_coding | 15 | 51200869  | 51298097  | AP4E1    |
| ENSG00000081019 | 7.277615649 | 7.442134301 | protein_coding | 1  | 114304454 | 114355098 | RSBN1    |
| ENSG00000081026 | 7.1740722   | 7.292770473 | protein_coding | 1  | 113933371 | 114228545 | MAGI3    |
| ENSG00000081041 | 9.447567586 | 8.847439299 | protein_coding | 4  | 74962793  | 74965010  | CXCL2    |
| ENSG00000081051 | 0           | 0.697730409 | protein_coding | 4  | 74296855  | 74321891  | AFP      |
| ENSG00000081052 | 1.407729925 | 0.950786998 | protein_coding | 2  | 227867427 | 228028829 | COL4A4   |
| ENSG00000081059 | 7.053569556 | 5.283144778 | protein_coding | 5  | 133450402 | 133487556 | TCF7     |
| ENSG00000081087 | 8.199812472 | 8.501254594 | protein_coding | 6  | 108362613 | 108487058 | OSTM1    |
| ENSG00000081148 | 1.407729925 | 2.144285137 | protein_coding | 3  | 100945570 | 101039404 | IMPG2    |
| ENSG00000081154 | 9.963910896 | 9.935650135 | protein_coding | 3  | 101292939 | 101313281 | PCNP     |
| ENSG00000081177 | 9.077762113 | 9.454562557 | protein_coding | 14 | 69658228  | 69709075  | EXD2     |
| ENSG00000081181 | 7.494827594 | 7.609989438 | protein_coding | 14 | 68086515  | 68118437  | ARG2     |
| ENSG00000081189 | 5.741167503 | 4.448594745 | protein_coding | 5  | 88013975  | 88199922  | MEF2C    |
| ENSG00000081237 | 0           | 0.390640832 | protein_coding | 1  | 198607801 | 198726545 | PTPRC    |
| ENSG00000081248 | 0           | 0.390640832 | protein_coding | 1  | 201008642 | 201081694 | CACNA1S  |
| ENSG00000081277 | 0           | 0.697730409 | protein_coding | 1  | 201252580 | 201302121 | PKP1     |
| ENSG00000081307 | 8.66103884  | 8.76630664  | protein_coding | 3  | 132373290 | 132396941 | UBA5     |
| ENSG00000081320 | 8.574534937 | 7.681666888 | protein_coding | 2  | 196998290 | 197041227 | STK17B   |
| ENSG00000081377 | 8.166995477 | 7.896480033 | protein_coding | 9  | 99252523  | 99382112  | CDC14B   |
| ENSG00000081386 | 7.457998197 | 7.544210495 | protein_coding | 9  | 99518147  | 99540411  | ZNF510   |
| ENSG00000081479 | 0.499066092 | 0           | protein_coding | 2  | 169983619 | 170219195 | LRP2     |
| ENSG00000081665 | 8.112022537 | 8.216065544 | protein_coding | 19 | 19902620  | 19932560  | ZNF506   |
| ENSG00000081692 | 6.138202758 | 6.963107483 | protein_coding | 1  | 227918126 | 227923112 | JMJD4    |
| ENSG00000081721 | 7.813830732 | 8.285289377 | protein_coding | 1  | 161719548 | 161727028 | DUSP12   |
| ENSG00000081760 | 9.151960225 | 8.930701228 | protein_coding | 12 | 125549925 | 125627873 | AACS     |
| ENSG00000081791 | 8.75650134  | 8.749726325 | protein_coding | 5  | 141303373 | 141321612 | KIAA0141 |
| ENSG00000081803 | 7.214780754 | 7.090370599 | protein_coding | 7  | 121958481 | 122526813 | CADPS2   |
| ENSG00000081818 | 2.35979773  | 2.334191469 | protein_coding | 5  | 140501581 | 140505201 | PCDHB4   |
| ENSG00000081842 | 3.911897206 | 2.788380093 | protein_coding | 5  | 140207563 | 140391929 | PCDHA6   |
| ENSG00000081853 | 5.986594255 | 5.43605125  | protein_coding | 5  | 140718539 | 140892546 | PCDHGA2  |
| ENSG00000081870 | 6.887241849 | 7.460081189 | protein_coding | 1  | 54387234  | 54411975  | HSPB11   |
| ENSG00000081913 | 8.041355121 | 7.815148897 | protein_coding | 18 | 60382672  | 60647666  | PHLPP1   |
| ENSG00000081923 | 8.641761486 | 8.435390709 | protein_coding | 18 | 55313658  | 55470327  | ATP8B1   |
| ENSG00000081985 | 2.928422289 | 1.925536307 | protein_coding | 1  | 67773047  | 67862583  | IL12RB2  |
| ENSG00000082014 | 6.640654398 | 6.937714655 | protein_coding | 7  | 150935850 | 150974982 | SMARCD3  |

|                 |             |             |                |    |           |           |          |
|-----------------|-------------|-------------|----------------|----|-----------|-----------|----------|
| ENSG00000082068 | 8.718787866 | 8.675956977 | protein_coding | 5  | 37379314  | 37753537  | WDR70    |
| ENSG00000082074 | 6.585843317 | 2.039052734 | protein_coding | 5  | 39105338  | 39274630  | FYB      |
| ENSG00000082126 | 0.499066092 | 1.353254395 | protein_coding | 2  | 202509593 | 202563417 | MPP4     |
| ENSG00000082146 | 6.922076877 | 6.904395923 | protein_coding | 2  | 202252581 | 202345574 | STRADB   |
| ENSG00000082153 | 11.01424267 | 10.44100201 | protein_coding | 2  | 201675317 | 201688569 | BZW1     |
| ENSG00000082196 | 3.950976309 | 4.363974406 | protein_coding | 5  | 33987279  | 34124633  | C1QTNF3  |
| ENSG00000082212 | 9.499564655 | 9.823765224 | protein_coding | 18 | 48405419  | 48476160  | ME2      |
| ENSG00000082213 | 9.635463295 | 9.066597822 | protein_coding | 5  | 31532373  | 31555165  | C5orf22  |
| ENSG00000082258 | 8.580777545 | 8.501254594 | protein_coding | 2  | 135675805 | 135716912 | CCNT2    |
| ENSG00000082269 | 7.062518763 | 6.440109466 | protein_coding | 6  | 71122644  | 71270877  | FAM135A  |
| ENSG00000082293 | 0.499066092 | 1.353254395 | protein_coding | 6  | 70576463  | 70919679  | COL19A1  |
| ENSG00000082438 | 6.112579918 | 7.080460027 | protein_coding | 2  | 165510134 | 165700189 | COBLL1   |
| ENSG00000082458 | 8.380642463 | 7.659647832 | protein_coding | X  | 69664711  | 69725337  | DLG3     |
| ENSG00000082497 | 6.777386522 | 6.450406542 | protein_coding | 1  | 210406144 | 210419976 | SERTAD4  |
| ENSG00000082512 | 6.846372398 | 7.670699368 | protein_coding | 1  | 211499957 | 211548288 | TRAF5    |
| ENSG00000082515 | 7.553136766 | 8.116121984 | protein_coding | 5  | 154320630 | 154348971 | MRPL22   |
| ENSG00000082516 | 9.31342641  | 9.227175607 | protein_coding | 5  | 154266976 | 154317769 | GEMIN5   |
| ENSG00000082556 | 0.499066092 | 0           | protein_coding | 8  | 54138284  | 54164257  | OPRK1    |
| ENSG00000082641 | 11.78467101 | 12.03823726 | protein_coding | 17 | 46125686  | 46138906  | NFE2L1   |
| ENSG00000082684 | 3.448790144 | 5.163066621 | protein_coding | 3  | 122628041 | 122747452 | SEMA5B   |
| ENSG00000082701 | 10.06978434 | 9.761034214 | protein_coding | 3  | 119540170 | 119813264 | GSK3B    |
| ENSG00000082781 | 10.43710307 | 10.72538179 | protein_coding | 3  | 124480795 | 124606674 | ITGB5    |
| ENSG00000082805 | 10.37514929 | 10.06273716 | protein_coding | 12 | 1099675   | 1605090   | ERC1     |
| ENSG00000082898 | 11.26790536 | 11.31032524 | protein_coding | 2  | 61704984  | 61765761  | XPO1     |
| ENSG00000082996 | 8.331511968 | 8.202422444 | protein_coding | 3  | 149530495 | 149679926 | RNF13    |
| ENSG00000083093 | 8.257454839 | 8.663840043 | protein_coding | 16 | 23614488  | 23652631  | PALB2    |
| ENSG00000083097 | 6.393570237 | 6.915587884 | protein_coding | 6  | 83777385  | 83881069  | DOPEY1   |
| ENSG00000083099 | 7.881135284 | 8.106387334 | protein_coding | 6  | 90277863  | 90348472  | LYRM2    |
| ENSG00000083123 | 6.820228284 | 6.952279523 | protein_coding | 6  | 80816364  | 81055987  | BCKDHB   |
| ENSG00000083168 | 8.976050934 | 8.811942385 | protein_coding | 8  | 41786997  | 41909508  | KAT6A    |
| ENSG00000083223 | 8.53810609  | 8.633659743 | protein_coding | 9  | 88902648  | 88969369  | ZCCHC6   |
| ENSG00000083290 | 7.440941622 | 8.606292299 | protein_coding | 17 | 19674143  | 19771249  | ULK2     |
| ENSG00000083307 | 7.76258174  | 0           | protein_coding | 8  | 102504660 | 102681954 | GRHL2    |
| ENSG00000083312 | 10.60193356 | 10.4020761  | protein_coding | 5  | 72112139  | 72212560  | TNPO1    |
| ENSG00000083444 | 11.57728171 | 12.27453258 | protein_coding | 1  | 11994262  | 12035599  | PLOD1    |
| ENSG00000083454 | 7.715131365 | 7.093659051 | protein_coding | 17 | 3575748   | 3599698   | P2RX5    |
| ENSG00000083457 | 7.269909329 | 8.554729165 | protein_coding | 17 | 3617920   | 3704537   | ITGAE    |
| ENSG00000083520 | 8.70742151  | 8.159132889 | protein_coding | 13 | 73329540  | 73356234  | DIS3     |
| ENSG00000083535 | 6.47626108  | 6.044260771 | protein_coding | 13 | 73356197  | 73590592  | PIBF1    |
| ENSG00000083544 | 6.343050432 | 6.316088276 | protein_coding | 13 | 60970591  | 61148012  | TDRD3    |
| ENSG00000083635 | 6.970425921 | 6.293387477 | protein_coding | 13 | 45513384  | 45563618  | NUFIP1   |
| ENSG00000083642 | 8.445362311 | 7.894595919 | protein_coding | 13 | 33160564  | 33352157  | PDS5B    |
| ENSG00000083720 | 10.30146577 | 10.46786018 | protein_coding | 5  | 41730167  | 41870621  | OXCT1    |
| ENSG00000083750 | 6.350376764 | 6.881748114 | protein_coding | X  | 55744172  | 55785207  | RRAGB    |
| ENSG00000083799 | 9.310612162 | 10.30469907 | protein_coding | 16 | 50775961  | 50835846  | CYLD     |
| ENSG00000083807 | 7.457998197 | 7.243290054 | protein_coding | 19 | 59009704  | 59023432  | SLC27A5  |
| ENSG00000083812 | 7.498129565 | 7.281279771 | protein_coding | 19 | 58978459  | 58984781  | ZNF324   |
| ENSG00000083814 | 6.738827102 | 6.729413443 | protein_coding | 19 | 58231120  | 58238995  | ZNF671   |
| ENSG00000083817 | 6.788216822 | 6.414040573 | protein_coding | 19 | 58082935  | 58090243  | ZNF416   |
| ENSG00000083828 | 7.593829938 | 7.439552137 | protein_coding | 19 | 58280997  | 58320617  | ZNF586   |
| ENSG00000083838 | 6.998676229 | 7.312661576 | protein_coding | 19 | 58987795  | 59000899  | ZNF446   |
| ENSG00000083842 | 7.46813618  | 7.532142019 | protein_coding | 19 | 58790318  | 58807254  | ZNF8     |
| ENSG00000083844 | 9.171738888 | 8.815929893 | protein_coding | 19 | 57702868  | 57734212  | ZNF264   |
| ENSG00000083845 | 13.10844823 | 13.55231539 | protein_coding | 19 | 58898636  | 58906170  | RP55     |
| ENSG00000083857 | 10.90249438 | 11.3952271  | protein_coding | 4  | 187508937 | 187647876 | FAT1     |
| ENSG00000083896 | 9.30213633  | 9.469827862 | protein_coding | 4  | 69176105  | 69215807  | YTHDC1   |
| ENSG00000083937 | 8.443650765 | 8.269383236 | protein_coding | 3  | 87276421  | 87304698  | CHMP2B   |
| ENSG00000084070 | 8.18759341  | 7.992972811 | protein_coding | 1  | 40810522  | 40888998  | SMAP2    |
| ENSG00000084072 | 8.574534937 | 8.861975727 | protein_coding | 1  | 40157854  | 40229586  | PPIE     |
| ENSG00000084073 | 8.98077946  | 9.09886653  | protein_coding | 1  | 40723779  | 40759856  | ZMPSTE24 |
| ENSG00000084090 | 10.99333545 | 10.44196989 | protein_coding | 2  | 96850597  | 96874563  | STARD7   |
| ENSG00000084092 | 8.640267888 | 8.66273344  | protein_coding | 4  | 57829536  | 57844989  | NOA1     |
| ENSG00000084093 | 8.718787866 | 8.66273344  | protein_coding | 4  | 57774042  | 57813577  | REST     |



|                 |             |             |                  |    |           |           |          |
|-----------------|-------------|-------------|------------------|----|-----------|-----------|----------|
| ENSG00000084110 | 2.671945279 | 2.501982735 | protein_coding   | 12 | 96366440  | 96390143  | HAL      |
| ENSG00000084112 | 9.802351442 | 9.398495997 | protein_coding   | 12 | 109176466 | 109251366 | SSH1     |
| ENSG00000084207 | 12.58648018 | 13.19077694 | protein_coding   | 11 | 67351066  | 67354131  | GSTP1    |
| ENSG00000084234 | 13.08523984 | 13.22660304 | protein_coding   | 11 | 129939732 | 130014699 | APLP2    |
| ENSG00000084444 | 7.484876093 | 6.510691757 | protein_coding   | 12 | 13197218  | 13295455  | KIAA1467 |
| ENSG00000084463 | 10.56541181 | 10.20141416 | protein_coding   | 12 | 14939410  | 14956474  | WBP11    |
| ENSG00000084623 | 10.97597436 | 10.84728173 | protein_coding   | 1  | 32687529  | 32697205  | EIF3I    |
| ENSG00000084628 | 0.499066092 | 0.950786998 | protein_coding   | 1  | 31652592  | 31712401  | NKAIN1   |
| ENSG00000084636 | 9.088754802 | 10.07443515 | protein_coding   | 1  | 32117848  | 32169920  | COL16A1  |
| ENSG00000084652 | 10.18899434 | 10.07941968 | protein_coding   | 1  | 32645287  | 32663886  | TXLNA    |
| ENSG00000084676 | 7.712290964 | 7.460081189 | protein_coding   | 2  | 24714783  | 24993571  | NCOA1    |
| ENSG00000084693 | 8.805299741 | 8.739266022 | protein_coding   | 2  | 27265232  | 27293490  | AGBL5    |
| ENSG00000084710 | 2.471521042 | 2.652276565 | protein_coding   | 2  | 25264999  | 25378243  | EFR3B    |
| ENSG00000084731 | 9.526494794 | 9.682951719 | protein_coding   | 2  | 26149471  | 26205618  | KIF3C    |
| ENSG00000084733 | 10.59809193 | 10.86061382 | protein_coding   | 2  | 26256976  | 26360323  | RAB10    |
| ENSG00000084734 | 2.671945279 | 1.925536307 | protein_coding   | 2  | 27719709  | 27746554  | GCKR     |
| ENSG00000084754 | 10.80654585 | 10.8996516  | protein_coding   | 2  | 26413504  | 26467594  | HADHA    |
| ENSG00000084764 | 7.940593421 | 8.026050991 | protein_coding   | 2  | 27193480  | 27250064  | MAPRE3   |
| ENSG00000084774 | 11.46259163 | 11.34712838 | protein_coding   | 2  | 27440258  | 27466660  | CAD      |
| ENSG00000085063 | 10.36659374 | 11.25669407 | protein_coding   | 11 | 33719807  | 33757991  | CD59     |
| ENSG00000085117 | 8.650690744 | 8.534302826 | protein_coding   | 11 | 44585977  | 44641913  | CD82     |
| ENSG00000085185 | 8.502378699 | 7.996490656 | protein_coding   | X  | 129115083 | 129192058 | BCORL1   |
| ENSG00000085224 | 9.567149814 | 9.608468897 | protein_coding   | X  | 76760378  | 77041702  | ATRX     |
| ENSG00000085231 | 8.965354743 | 9.003312166 | protein_coding   | 5  | 68646811  | 68665840  | TAF9     |
| ENSG00000085274 | 7.67776266  | 7.842771865 | protein_coding   | 3  | 169490853 | 169507504 | MYNN     |
| ENSG00000085276 | 8.309127368 | 7.928139131 | protein_coding   | 3  | 168801287 | 169381406 | MECOM    |
| ENSG00000085365 | 8.839544001 | 8.449576416 | processed_transc | 5  | 77656339  | 77776562  | SCAMP1   |
| ENSG00000085377 | 8.978417134 | 8.951693347 | protein_coding   | 6  | 105725440 | 105850959 | PREP     |
| ENSG00000085382 | 6.560798025 | 6.750400563 | protein_coding   | 6  | 105175968 | 105307794 | HACE1    |
| ENSG00000085415 | 9.616598542 | 9.469827862 | protein_coding   | 18 | 12947983  | 12987533  | SEH1L    |
| ENSG00000085433 | 7.202688343 | 7.087074634 | protein_coding   | 1  | 109512836 | 109584850 | WDR47    |
| ENSG00000085449 | 9.466233411 | 9.390496617 | protein_coding   | 2  | 224720433 | 224810104 | WDFY1    |
| ENSG00000085465 | 4.6658819   | 5.085909553 | protein_coding   | 1  | 111956936 | 111970399 | OVGP1    |
| ENSG00000085491 | 8.635777795 | 8.605140645 | protein_coding   | 1  | 108676658 | 108743471 | SLC25A24 |
| ENSG00000085511 | 8.528449672 | 8.317991549 | protein_coding   | 6  | 161412759 | 161551917 | MAP3K4   |
| ENSG00000085514 | 3.950976309 | 3.081239798 | protein_coding   | 7  | 99965153  | 99997719  | PILRA    |
| ENSG00000085552 | 6.598204782 | 5.717592784 | protein_coding   | 1  | 159896829 | 159915394 | IGSF9    |
| ENSG00000085644 | 8.380642463 | 8.343077302 | protein_coding   | 16 | 3185057   | 3192804   | ZNF213   |
| ENSG00000085662 | 14.02987148 | 13.5303007  | protein_coding   | 7  | 134127127 | 134144036 | AKR1B1   |
| ENSG00000085719 | 9.857382318 | 9.650942216 | protein_coding   | 8  | 87497059  | 87573726  | CPNE3    |
| ENSG00000085721 | 9.191250057 | 9.353940157 | protein_coding   | 16 | 15153879  | 15188174  | RRN3     |
| ENSG00000085733 | 12.4773665  | 12.08463011 | protein_coding   | 11 | 70244510  | 70282690  | CTTN     |
| ENSG00000085741 | 1.799000381 | 0.697730409 | protein_coding   | 11 | 75897369  | 75921803  | WNT11    |
| ENSG00000085760 | 8.593182305 | 8.870627795 | protein_coding   | 2  | 55463731  | 55496483  | MTIF2    |
| ENSG00000085788 | 8.908170811 | 8.675956977 | protein_coding   | 8  | 38082736  | 38133076  | DDHD2    |
| ENSG00000085831 | 5.175139844 | 3.027231696 | protein_coding   | 1  | 51752930  | 51810788  | TTC39A   |
| ENSG00000085832 | 9.200400892 | 8.965221116 | protein_coding   | 1  | 51819935  | 51985000  | EPS15    |
| ENSG00000085840 | 8.156585168 | 7.985911283 | protein_coding   | 1  | 52838501  | 52870131  | ORC1     |
| ENSG00000085871 | 5.538004898 | 5.456629825 | protein_coding   | 4  | 140586922 | 140661899 | MGST2    |
| ENSG00000085872 | 10.62891894 | 10.36138879 | protein_coding   | 19 | 16628700  | 16653341  | CHERP    |
| ENSG00000085978 | 8.585441838 | 8.317991549 | protein_coding   | 2  | 234118697 | 234204320 | ATG16L1  |
| ENSG00000085982 | 9.457778871 | 9.224178134 | protein_coding   | 2  | 234384166 | 234475428 | USP40    |
| ENSG00000085998 | 9.122309386 | 9.478029618 | protein_coding   | 1  | 46654354  | 46685977  | POMGNT1  |
| ENSG00000085999 | 8.137655191 | 8.220584723 | protein_coding   | 1  | 46713360  | 46744145  | RAD54L   |
| ENSG00000086015 | 10.22978644 | 10.66670026 | protein_coding   | 1  | 46252659  | 46501896  | MAST2    |
| ENSG00000086061 | 10.23770949 | 10.54735887 | protein_coding   | 9  | 33025209  | 33039905  | DNAJA1   |
| ENSG00000086062 | 11.62733291 | 11.32281433 | protein_coding   | 9  | 33104080  | 33167354  | B4GALT1  |
| ENSG00000086065 | 8.549290825 | 9.080752488 | protein_coding   | 9  | 33264940  | 33281977  | CHMP5    |
| ENSG00000086102 | 8.971306859 | 8.989255971 | protein_coding   | 9  | 33290509  | 33371155  | NFX1     |
| ENSG00000086159 | 1.16343121  | 1.518964905 | protein_coding   | 12 | 50360977  | 50370922  | AQP6     |
| ENSG00000086189 | 8.53489446  | 8.65940853  | protein_coding   | 5  | 61683081  | 61699766  | DIMT1    |
| ENSG00000086200 | 8.735671237 | 8.612036819 | protein_coding   | 5  | 61699799  | 61924409  | IPO11    |
| ENSG00000086232 | 11.29259848 | 11.01101834 | protein_coding   | 7  | 6061881   | 6098861   | EIF2AK1  |

|                 |             |             |                |    |           |           |           |
|-----------------|-------------|-------------|----------------|----|-----------|-----------|-----------|
| ENSG00000086289 | 9.74652684  | 9.568257332 | protein_coding | 7  | 37723446  | 37991543  | EPDR1     |
| ENSG00000086300 | 7.119373418 | 7.307006333 | protein_coding | 7  | 26331541  | 26413949  | SNX10     |
| ENSG00000086475 | 10.00336794 | 9.594609026 | protein_coding | 10 | 13359424  | 13390297  | SEPHS1    |
| ENSG00000086504 | 10.04685659 | 10.13074314 | protein_coding | 16 | 416927    | 420568    | MRPL28    |
| ENSG00000086506 | 0.499066092 | 0.950786998 | protein_coding | 16 | 230452    | 231180    | HBQ1      |
| ENSG00000086544 | 6.585843317 | 6.24096575  | protein_coding | 19 | 41223008  | 41246763  | ITPKC     |
| ENSG00000086570 | 6.610461229 | 2.652276565 | protein_coding | 5  | 150883654 | 150948505 | FAT2      |
| ENSG00000086589 | 8.849919232 | 8.770422115 | protein_coding | 5  | 150070356 | 150080669 | RBM22     |
| ENSG00000086598 | 10.62778887 | 10.60293639 | protein_coding | 12 | 124069078 | 124083116 | TMED2     |
| ENSG00000086619 | 3.448790144 | 3.935919592 | protein_coding | 1  | 236378855 | 236445319 | ERO1LB    |
| ENSG00000086666 | 8.635777795 | 8.641545092 | protein_coding | 15 | 80351910  | 80430735  | ZFAND6    |
| ENSG00000086712 | 8.805299741 | 9.055679178 | protein_coding | X  | 16804550  | 16862642  | TXLNG     |
| ENSG00000086717 | 1.407729925 | 2.788380093 | protein_coding | X  | 18694029  | 18846039  | PPEF1     |
| ENSG00000086730 | 5.613019223 | 5.163066621 | protein_coding | 7  | 73613982  | 73644161  | LAT2      |
| ENSG00000086758 | 13.83036287 | 13.67167652 | protein_coding | X  | 53559057  | 53713673  | HUWE1     |
| ENSG00000086827 | 8.665451116 | 8.89250574  | protein_coding | 11 | 113603909 | 113644533 | ZW10      |
| ENSG00000086848 | 5.588445295 | 5.94580061  | protein_coding | 11 | 111652919 | 111750145 | ALG9      |
| ENSG00000086967 | 0.499066092 | 0.390640832 | protein_coding | 19 | 50936160  | 50969583  | MYBPC2    |
| ENSG00000087008 | 7.132181536 | 7.593823731 | protein_coding | 4  | 8368439   | 8442450   | ACOX3     |
| ENSG00000087053 | 9.792299736 | 9.833140726 | protein_coding | 11 | 95566046  | 95658479  | MTMR2     |
| ENSG00000087074 | 9.953725374 | 9.996206443 | protein_coding | 19 | 49375649  | 49379318  | PPP1R15A  |
| ENSG00000087076 | 4.19837882  | 5.84793576  | protein_coding | 19 | 49316279  | 49339934  | HSD17B14  |
| ENSG00000087077 | 10.39609755 | 9.728615271 | protein_coding | 7  | 100464760 | 100471076 | TRIP6     |
| ENSG00000087085 | 2.35979773  | 2.420525079 | protein_coding | 7  | 100487615 | 100494594 | ACHE      |
| ENSG00000087086 | 13.31165094 | 13.59300384 | protein_coding | 19 | 49468566  | 49470135  | FTL       |
| ENSG00000087087 | 10.65910102 | 10.62384241 | protein_coding | 7  | 100472733 | 100486285 | SRRT      |
| ENSG00000087088 | 9.65186265  | 9.592867142 | protein_coding | 19 | 49458072  | 49465057  | BAX       |
| ENSG00000087095 | 7.787084643 | 7.126137778 | protein_coding | 17 | 26369182  | 26523407  | NLK       |
| ENSG00000087111 | 10.00336794 | 9.469827862 | protein_coding | 17 | 26880405  | 26898546  | PIGS      |
| ENSG00000087116 | 4.75690578  | 7.005624493 | protein_coding | 5  | 178537852 | 178772431 | ADAMTS2   |
| ENSG00000087152 | 9.528110879 | 8.967911514 | protein_coding | 17 | 42269174  | 42277453  | ATXN7L3   |
| ENSG00000087157 | 7.464764762 | 7.577474828 | protein_coding | 17 | 76374735  | 76420635  | PGS1      |
| ENSG00000087191 | 10.88683462 | 11.08475568 | protein_coding | 17 | 61904810  | 61909386  | PSMC5     |
| ENSG00000087206 | 8.243750574 | 8.333373496 | protein_coding | 5  | 176332006 | 176449634 | UIMC1     |
| ENSG00000087237 | 2.35979773  | 3.532712221 | protein_coding | 16 | 56995762  | 57017757  | CETP      |
| ENSG00000087245 | 3.146112541 | 3.411459265 | protein_coding | 16 | 55512742  | 55540603  | MMP2      |
| ENSG00000087253 | 7.663128351 | 8.234057939 | protein_coding | 16 | 55542910  | 55620578  | LPCAT2    |
| ENSG00000087258 | 9.414746625 | 9.818309323 | protein_coding | 16 | 56225302  | 56391356  | GNAO1     |
| ENSG00000087263 | 9.12764907  | 9.381107599 | protein_coding | 16 | 56485402  | 56513012  | OGFOD1    |
| ENSG00000087266 | 10.15121608 | 10.3589995  | protein_coding | 4  | 2794750   | 2842825   | SH3BP2    |
| ENSG00000087269 | 9.487155506 | 9.562335454 | protein_coding | 4  | 2939660   | 2965112   | NOP14     |
| ENSG00000087274 | 10.39609755 | 10.39709408 | protein_coding | 4  | 2845584   | 2931803   | ADD1      |
| ENSG00000087299 | 7.161632221 | 7.392265003 | protein_coding | 14 | 50704281  | 50779266  | L2HGDH    |
| ENSG00000087301 | 6.738827102 | 7.315480906 | protein_coding | 14 | 52897308  | 53019240  | TXNDC16   |
| ENSG00000087302 | 10.05416589 | 10.4939164  | protein_coding | 14 | 52456193  | 52471420  | C14orf166 |
| ENSG00000087303 | 3.911897206 | 3.493416095 | protein_coding | 14 | 52471521  | 52536545  | NID2      |
| ENSG00000087338 | 7.599989788 | 7.827052132 | protein_coding | 2  | 70056774  | 70108528  | GMCL1     |
| ENSG00000087365 | 11.92222955 | 11.84628102 | protein_coding | 11 | 65818200  | 65836779  | SF3B2     |
| ENSG00000087448 | 8.407231133 | 8.295320915 | protein_coding | 12 | 27932953  | 27955973  | KLHDC5    |
| ENSG00000087460 | 13.13533723 | 13.13501313 | protein_coding | 20 | 57414773  | 57486247  | GNAS      |
| ENSG00000087470 | 10.22531053 | 10.28900665 | protein_coding | 12 | 32832134  | 32905700  | DNM1L     |
| ENSG00000087494 | 4.923348194 | 3.813624741 | protein_coding | 12 | 28111017  | 28125638  | PTH1LH    |
| ENSG00000087495 | 0.869158192 | 2.579085888 | protein_coding | 20 | 58152564  | 58422766  | PHACTR3   |
| ENSG00000087502 | 8.735671237 | 8.706348549 | protein_coding | 12 | 29490285  | 29534122  | ERGIC2    |
| ENSG00000087510 | 8.766120079 | 8.481307156 | protein_coding | 20 | 55204358  | 55214339  | TFAP2C    |
| ENSG00000087586 | 9.546566899 | 9.439133999 | protein_coding | 20 | 54944445  | 54967393  | AURKA     |
| ENSG00000087589 | 2.10647801  | 2.039052734 | protein_coding | 20 | 54987168  | 55034396  | CASS4     |
| ENSG00000087842 | 7.549958459 | 7.053694091 | protein_coding | X  | 15402921  | 15511687  | PIR       |
| ENSG00000087884 | 5.255381949 | 5.995870484 | protein_coding | 11 | 77532155  | 77629478  | C11orf67  |
| ENSG00000087903 | 7.981274537 | 7.999999944 | protein_coding | 19 | 5993175   | 6110664   | RFX2      |
| ENSG00000087916 | 3.989024711 | 4.319727133 | protein_coding | X  | 115567790 | 115592625 | SLC6A14   |
| ENSG00000087995 | 7.281453427 | 7.421346415 | protein_coding | 17 | 60501246  | 60527454  | METTTL2A  |
| ENSG00000088002 | 2.10647801  | 2.334191469 | protein_coding | 19 | 49055429  | 49102683  | SULT2B1   |

|                 |             |             |                  |    |           |           |          |
|-----------------|-------------|-------------|------------------|----|-----------|-----------|----------|
| ENSG00000088035 | 7.04004079  | 7.41347308  | protein_coding   | 1  | 63833261  | 63904233  | ALG6     |
| ENSG00000088038 | 10.22032095 | 9.804327751 | protein_coding   | 19 | 54641444  | 54659419  | CNOT3    |
| ENSG00000088053 | 5.525114348 | 3.748356452 | protein_coding   | 19 | 55525073  | 55549632  | GP6      |
| ENSG00000088179 | 7.96466218  | 7.813155441 | protein_coding   | 2  | 120517207 | 120741394 | PTPN4    |
| ENSG00000088205 | 10.33370433 | 10.13673322 | protein_coding   | 2  | 118572226 | 118589955 | DDX18    |
| ENSG00000088247 | 12.18320327 | 11.99712347 | protein_coding   | 19 | 6413121   | 6424822   | KHSRP    |
| ENSG00000088256 | 9.347691482 | 9.364868601 | protein_coding   | 19 | 3094408   | 3121452   | GNA11    |
| ENSG00000088280 | 7.660183591 | 7.20731193  | protein_coding   | 1  | 23750352  | 23810750  | ASAP3    |
| ENSG00000088298 | 9.632461462 | 10.10937675 | protein_coding   | 20 | 33703160  | 33865928  | EDEM2    |
| ENSG00000088305 | 8.096857104 | 8.066778281 | protein_coding   | 20 | 31350191  | 31397162  | DNMT3B   |
| ENSG00000088325 | 11.71206111 | 11.71591486 | protein_coding   | 20 | 30327074  | 30389608  | TPX2     |
| ENSG00000088340 | 9.520824196 | 8.578395649 | pseudogene       | 20 | 34146507  | 34195451  | FER1L4   |
| ENSG00000088356 | 7.680671792 | 8.398639372 | protein_coding   | 20 | 30532758  | 30539895  | PDRG1    |
| ENSG00000088367 | 8.515473076 | 7.315480906 | protein_coding   | 20 | 34679426  | 34820721  | EPB41L1  |
| ENSG00000088387 | 8.369868254 | 8.129000175 | protein_coding   | 13 | 99445741  | 99738879  | DOCK9    |
| ENSG00000088448 | 9.125515568 | 9.342237258 | protein_coding   | 13 | 111530887 | 111567416 | ANKRD10  |
| ENSG00000088451 | 6.35766608  | 6.450406542 | protein_coding   | 13 | 95226308  | 95248511  | TGDS     |
| ENSG00000088538 | 6.26766507  | 7.373448694 | protein_coding   | 3  | 50712672  | 51421629  | DOCK3    |
| ENSG00000088543 | 5.899377978 | 6.217041467 | protein_coding   | 3  | 50595462  | 50608458  | C3orf18  |
| ENSG00000088682 | 8.495786671 | 9.212881815 | protein_coding   | 16 | 57481337  | 57495187  | COQ9     |
| ENSG00000088726 | 6.196276899 | 5.901455548 | protein_coding   | 3  | 12775024  | 12810956  | TMEM40   |
| ENSG00000088727 | 5.625150983 | 5.545764946 | protein_coding   | 3  | 47269516  | 47324941  | KIF9     |
| ENSG00000088766 | 8.839544001 | 9.540813141 | protein_coding   | 20 | 5986736   | 6020699   | CRLS1    |
| ENSG00000088808 | 8.500733514 | 7.568048738 | protein_coding   | 14 | 104200089 | 104313927 | PPP1R13B |
| ENSG00000088812 | 10.25440288 | 10.85238672 | protein_coding   | 20 | 3451687   | 3631769   | ATRN     |
| ENSG00000088826 | 8.78921631  | 8.031205224 | protein_coding   | 20 | 4101627   | 4168394   | SMOX     |
| ENSG00000088827 | 2.928422289 | 3.183544561 | protein_coding   | 20 | 3667617   | 3687775   | SIGLEC1  |
| ENSG00000088832 | 11.935382   | 12.20629775 | protein_coding   | 20 | 1349622   | 1373806   | FKBP1A   |
| ENSG00000088833 | 9.963910896 | 10.17099362 | protein_coding   | 20 | 1422807   | 1448417   | NSFL1C   |
| ENSG00000088836 | 6.96088487  | 6.559073862 | protein_coding   | 20 | 3208063   | 3219887   | SLC4A11  |
| ENSG00000088854 | 7.703736051 | 7.991210667 | protein_coding   | 20 | 3229951   | 3388272   | C2orf194 |
| ENSG00000088876 | 8.006999229 | 8.727671407 | protein_coding   | 20 | 2462463   | 2505348   | ZNF343   |
| ENSG00000088881 | 4.883502971 | 5.137803333 | protein_coding   | 20 | 2673480   | 2740754   | EBF4     |
| ENSG00000088882 | 1.407729925 | 1.667587519 | protein_coding   | 20 | 2774715   | 2781283   | CPXM1    |
| ENSG00000088888 | 10.57638764 | 10.78533279 | protein_coding   | 20 | 3827487   | 3849280   | MAVS     |
| ENSG00000088899 | 7.01259661  | 8.125791388 | protein_coding   | 20 | 3143263   | 3154192   |          |
| ENSG00000088926 | 0.499066092 | 0.390640832 | protein_coding   | 4  | 187187099 | 187210835 | F11      |
| ENSG00000088930 | 10.72258318 | 11.05933204 | protein_coding   | 20 | 21283942  | 21370463  | XRN2     |
| ENSG00000088970 | 7.430610036 | 7.929979971 | processed_transc | 20 | 21106624  | 21227260  | PLK1S1   |
| ENSG00000088986 | 10.14438343 | 10.63995824 | protein_coding   | 12 | 120907653 | 120936296 | DYNLL1   |
| ENSG00000088992 | 0.869158192 | 0           | protein_coding   | 12 | 117476728 | 117537284 | TESC     |
| ENSG00000089006 | 10.56777082 | 10.39809186 | protein_coding   | 20 | 17922241  | 17949623  | SNX5     |
| ENSG00000089009 | 10.49939184 | 10.82840737 | protein_coding   | 12 | 112842994 | 112856642 | RPL6     |
| ENSG00000089022 | 8.009315251 | 8.022604578 | protein_coding   | 12 | 112279782 | 112334343 | MAPKAPK5 |
| ENSG00000089041 | 3.744048221 | 3.368666104 | protein_coding   | 12 | 121570622 | 121623876 | P2RX7    |
| ENSG00000089048 | 9.265790136 | 9.305839261 | protein_coding   | 20 | 13694969  | 13765532  | ESF1     |
| ENSG00000089050 | 9.030655728 | 9.622766057 | protein_coding   | 20 | 18467184  | 18477887  | RBBP9    |
| ENSG00000089053 | 10.77218167 | 10.9795907  | protein_coding   | 12 | 121746048 | 121837699 | ANAPC5   |
| ENSG00000089057 | 9.934355333 | 9.922303325 | protein_coding   | 20 | 4833002   | 4990939   | SLC23A2  |
| ENSG00000089060 | 8.857651982 | 8.683615101 | protein_coding   | 12 | 113736564 | 113797298 | SLC24A6  |
| ENSG00000089063 | 10.35252484 | 10.73962107 | protein_coding   | 20 | 5080486   | 5093749   | C2orf30  |
| ENSG00000089091 | 4.981125677 | 5.361622823 | protein_coding   | 20 | 18364011  | 18447829  | DZANK1   |
| ENSG00000089094 | 8.303476525 | 8.231074746 | protein_coding   | 12 | 121866902 | 122018920 | KDM2B    |
| ENSG00000089101 | 1.616589159 | 0.390640832 | protein_coding   | 20 | 20033158  | 20341346  | C2orf26  |
| ENSG00000089123 | 7.384964606 | 7.362585296 | protein_coding   | 20 | 13246709  | 13619587  | TASP1    |
| ENSG00000089127 | 7.923503136 | 8.600524813 | protein_coding   | 12 | 113344582 | 113369991 | OAS1     |
| ENSG00000089154 | 11.74578763 | 11.5975586  | protein_coding   | 12 | 120565007 | 120632513 | GCN1L1   |
| ENSG00000089157 | 12.52265571 | 12.59935153 | protein_coding   | 12 | 120634489 | 120639038 | RPLP0    |
| ENSG00000089159 | 11.46491382 | 10.61357045 | protein_coding   | 12 | 120648250 | 120703574 | PXN      |
| ENSG00000089163 | 3.871730003 | 4.274079748 | protein_coding   | 12 | 120740119 | 120751052 | SIRT4    |
| ENSG00000089177 | 8.701704574 | 8.754928172 | protein_coding   | 20 | 16252749  | 16554078  | KIF16B   |
| ENSG00000089195 | 8.823839897 | 9.055679178 | protein_coding   | 20 | 5917881   | 5931182   | TRMT6    |
| ENSG00000089199 | 0.869158192 | 1.353254395 | protein_coding   | 20 | 5892076   | 5906007   | CHGB     |

|                 |             |             |                  |    |           |           |           |
|-----------------|-------------|-------------|------------------|----|-----------|-----------|-----------|
| ENSG00000089220 | 10.50924406 | 10.78533279 | protein_coding   | 12 | 118573663 | 118583389 | PEBP1     |
| ENSG00000089234 | 7.720795447 | 7.864110577 | protein_coding   | 12 | 112080797 | 112123790 | BRAP      |
| ENSG00000089248 | 10.17719799 | 10.42575316 | protein_coding   | 12 | 112451120 | 112461255 | ERP29     |
| ENSG00000089280 | 12.21264596 | 12.25364568 | protein_coding   | 16 | 31191431  | 31203127  | FUS       |
| ENSG00000089289 | 8.550881589 | 8.740315472 | protein_coding   | X  | 69353299  | 69386174  | IGBP1     |
| ENSG00000089327 | 10.66755738 | 10.91390641 | protein_coding   | 19 | 35645633  | 35660787  | FXVD5     |
| ENSG00000089335 | 6.96088487  | 7.444711851 | protein_coding   | 19 | 35168544  | 35177302  | ZNF302    |
| ENSG00000089336 | 1.616589159 | 2.334191469 | processed_transc | 19 | 36103665  | 36116251  |           |
| ENSG00000089351 | 9.459473748 | 9.658178764 | protein_coding   | 19 | 35485688  | 35517375  | GRAMD1A   |
| ENSG00000089356 | 7.420203928 | 0           | protein_coding   | 19 | 35606732  | 35615227  | FXVD3     |
| ENSG00000089472 | 1.16343121  | 0           | protein_coding   | X  | 65382391  | 65488709  | HEPH      |
| ENSG00000089486 | 8.15239992  | 8.34031144  | protein_coding   | 16 | 4560720   | 4588829   | C16orf5   |
| ENSG00000089505 | 4.230497448 | 4.872768657 | protein_coding   | 16 | 66600294  | 66613040  | CMTM1     |
| ENSG00000089558 | 1.799000381 | 2.420525079 | protein_coding   | 17 | 40308910  | 40333296  | KCNH4     |
| ENSG00000089597 | 12.8201102  | 12.95631633 | protein_coding   | 11 | 62392298  | 62414104  | GANAB     |
| ENSG00000089639 | 8.964161368 | 8.337540265 | protein_coding   | 19 | 19740288  | 19754455  | GMIP      |
| ENSG00000089682 | 7.395627075 | 7.605389119 | protein_coding   | X  | 106307650 | 106362057 | RBM41     |
| ENSG00000089685 | 10.17668292 | 9.814826612 | protein_coding   | 17 | 76210277  | 76221715  | BIRC5     |
| ENSG00000089692 | 4.962122459 | 4.903073497 | protein_coding   | 12 | 6881678   | 6887621   | LAG3      |
| ENSG00000089693 | 11.43076267 | 11.05364443 | protein_coding   | 12 | 6857170   | 6876641   | MLF2      |
| ENSG00000089723 | 7.234712227 | 6.174194902 | protein_coding   | 14 | 94492675  | 94515276  | OTUB2     |
| ENSG00000089737 | 11.27874564 | 10.8467946  | protein_coding   | 14 | 94517266  | 94547591  | DDX24     |
| ENSG00000089775 | 7.153278907 | 7.607691112 | protein_coding   | 14 | 64915824  | 64971931  | ZBTB25    |
| ENSG00000089818 | 8.085926212 | 7.933654619 | protein_coding   | 12 | 7926148   | 8250367   | NECAP1    |
| ENSG00000089820 | 7.67776266  | 7.609989438 | protein_coding   | X  | 153172821 | 153200452 | ARHGAP4   |
| ENSG00000089847 | 5.316509574 | 5.923798455 | protein_coding   | 19 | 4186267   | 4224811   | ANKRD24   |
| ENSG00000089876 | 9.108333003 | 9.330438649 | protein_coding   | 10 | 127524906 | 127585005 | DHX32     |
| ENSG00000089902 | 9.86443576  | 9.045526555 | protein_coding   | 14 | 103058998 | 103196891 | RCOR1     |
| ENSG00000089916 | 8.904442656 | 9.323452948 | protein_coding   | 14 | 76618259  | 76720685  | C14orf118 |
| ENSG00000090006 | 9.285033801 | 9.11108789  | protein_coding   | 19 | 41099072  | 41135725  | LTBP4     |
| ENSG00000090013 | 8.261346552 | 8.190185975 | protein_coding   | 19 | 40953693  | 40971725  | BLVRB     |
| ENSG00000090020 | 8.936437694 | 8.285289377 | protein_coding   | 1  | 27425306  | 27493472  | SLC9A1    |
| ENSG00000090054 | 9.282163564 | 9.354625616 | protein_coding   | 9  | 94793427  | 94877690  | SPTLC1    |
| ENSG00000090060 | 11.84992942 | 11.22086486 | protein_coding   | 14 | 96967770  | 97033448  | PAPOLA    |
| ENSG00000090061 | 10.24853313 | 9.064085459 | protein_coding   | 14 | 99947506  | 100001381 | CCNK      |
| ENSG00000090097 | 8.460675529 | 8.843538053 | protein_coding   | 3  | 51991470  | 52008032  | PCBP4     |
| ENSG00000090238 | 4.821592551 | 5.953060722 | protein_coding   | 16 | 30103635  | 30108236  | YPEL3     |
| ENSG00000090263 | 7.91858278  | 8.278081046 | protein_coding   | 7  | 140702196 | 140715028 | MRPS33    |
| ENSG00000090266 | 9.008829705 | 9.385138948 | protein_coding   | 7  | 140390577 | 140422590 | NDUFB2    |
| ENSG00000090273 | 10.26219225 | 10.31706091 | protein_coding   | 1  | 27226729  | 27273353  | NUDC      |
| ENSG00000090316 | 9.512684482 | 9.738102504 | protein_coding   | 4  | 1283639   | 1333935   | MAEA      |
| ENSG00000090339 | 12.79717209 | 13.42066788 | protein_coding   | 19 | 10381517  | 10397291  | ICAM1     |
| ENSG00000090372 | 10.19052591 | 10.04075742 | protein_coding   | 19 | 47222770  | 47250251  | STRN4     |
| ENSG00000090432 | 8.385999544 | 8.529454305 | protein_coding   | 1  | 20825943  | 20834654  | MUL1      |
| ENSG00000090447 | 8.925442603 | 8.276635048 | protein_coding   | 16 | 4307187   | 4323001   | TFAP4     |
| ENSG00000090470 | 7.590740122 | 7.258020107 | protein_coding   | 15 | 65409717  | 65426174  | PDCD7     |
| ENSG00000090487 | 9.672468519 | 9.570619293 | protein_coding   | 15 | 65255362  | 65282648  | SPG21     |
| ENSG00000090512 | 0.499066092 | 0.390640832 | protein_coding   | 3  | 186353758 | 186370930 | FETUB     |
| ENSG00000090520 | 9.76309053  | 9.67034314  | protein_coding   | 3  | 186285192 | 186315061 | DNAJB11   |
| ENSG00000090530 | 11.00759685 | 10.55453615 | protein_coding   | 3  | 189674517 | 189840226 | LEPREL1   |
| ENSG00000090534 | 0           | 0.390640832 | protein_coding   | 3  | 184089723 | 184095932 | THPO      |
| ENSG00000090539 | 1.16343121  | 1.518964905 | protein_coding   | 3  | 184097861 | 184108524 | CHRD      |
| ENSG00000090554 | 5.81716234  | 6.210997888 | protein_coding   | 19 | 49977486  | 49989487  | FLT3LG    |
| ENSG00000090565 | 9.05552222  | 9.335308591 | protein_coding   | 16 | 475619    | 573011    | RAB11FIP3 |
| ENSG00000090581 | 8.301587982 | 9.15109385  | protein_coding   | 16 | 1401924   | 1413352   | GNPTG     |
| ENSG00000090612 | 7.773523328 | 7.774746834 | protein_coding   | 12 | 133707570 | 133783698 | ZNF268    |
| ENSG00000090615 | 10.24460665 | 10.074019   | protein_coding   | 12 | 133345495 | 133405444 | GOLGA3    |
| ENSG00000090621 | 11.12090211 | 11.32088646 | protein_coding   | 1  | 40026488  | 40042462  | PABPC4    |
| ENSG00000090659 | 0.499066092 | 0           | protein_coding   | 19 | 7804879   | 7812464   | CD209     |
| ENSG00000090661 | 8.263288478 | 7.630511253 | protein_coding   | 19 | 8271620   | 8327305   | CERS4     |
| ENSG00000090674 | 8.185546801 | 8.989255971 | protein_coding   | 19 | 7587496   | 7598894   | MCOLN1    |
| ENSG00000090686 | 9.351347533 | 9.281534232 | protein_coding   | 1  | 22004791  | 22110099  | USP48     |
| ENSG00000090776 | 9.850294221 | 9.709451562 | protein_coding   | X  | 68048840  | 68061990  | EFNB1     |

|                 |             |             |                |    |           |           |         |
|-----------------|-------------|-------------|----------------|----|-----------|-----------|---------|
| ENSG00000090857 | 8.393111514 | 8.423679567 | protein_coding | 16 | 70147529  | 70195203  | PDPR    |
| ENSG00000090861 | 12.15236149 | 12.50030747 | protein_coding | 16 | 70286293  | 70323446  | AARS    |
| ENSG00000090863 | 11.69345794 | 11.92914782 | protein_coding | 16 | 74485856  | 74641012  | GLG1    |
| ENSG00000090889 | 9.506139483 | 9.694368449 | protein_coding | X  | 69509879  | 69640682  | KIF4A   |
| ENSG00000090905 | 9.86443576  | 9.822279296 | protein_coding | 16 | 24741016  | 24838953  | TNRC6A  |
| ENSG00000090920 | 3.146112541 | 2.501982735 | protein_coding | 19 | 40353964  | 40440533  | FCGBP   |
| ENSG00000090924 | 7.119373418 | 6.505763096 | protein_coding | 19 | 39903225  | 39919054  | PLEKHG2 |
| ENSG00000090932 | 4.230497448 | 4.777836593 | protein_coding | 19 | 39989557  | 39999118  | DLL3    |
| ENSG00000090971 | 8.171138658 | 8.597053222 | protein_coding | 19 | 55996594  | 55998935  | NAT14   |
| ENSG00000090975 | 8.774313977 | 8.273738696 | protein_coding | 12 | 123468027 | 123634562 | PITPNM2 |
| ENSG00000090989 | 8.443650765 | 8.634788863 | protein_coding | 4  | 56719782  | 56771200  | EXOC1   |
| ENSG00000091009 | 9.295509417 | 8.847439299 | protein_coding | 5  | 145583113 | 145718814 | RBM27   |
| ENSG00000091010 | 0.499066092 | 0           | protein_coding | 5  | 145718587 | 145720083 | POU4F3  |
| ENSG00000091039 | 9.144604451 | 9.222677059 | protein_coding | 12 | 76745577  | 76953589  | OSBPL8  |
| ENSG00000091073 | 8.197783135 | 7.591499486 | protein_coding | 7  | 76090993  | 76135312  |         |
| ENSG00000091106 | 1.799000381 | 3.027231696 | protein_coding | 2  | 32449522  | 32490923  | NLRC4   |
| ENSG00000091127 | 9.432113851 | 9.021555505 | protein_coding | 7  | 105080108 | 105162714 | PUS7    |
| ENSG00000091128 | 0.499066092 | 0.697730409 | protein_coding | 7  | 107663993 | 107770801 | LAMB4   |
| ENSG00000091129 | 1.407729925 | 1.353254395 | protein_coding | 7  | 107788082 | 108097161 | NRCAM   |
| ENSG00000091136 | 7.33043718  | 6.766973175 | protein_coding | 7  | 107564244 | 107643700 | LAMB1   |
| ENSG00000091137 | 1.16343121  | 2.851901313 | protein_coding | 7  | 107301080 | 107358254 | SLC26A4 |
| ENSG00000091138 | 0.869158192 | 0.390640832 | protein_coding | 7  | 107405912 | 107443670 | SLC26A3 |
| ENSG00000091140 | 10.73207945 | 10.4439037  | protein_coding | 7  | 107531415 | 107572175 | DLD     |
| ENSG00000091157 | 7.319279953 | 7.53698153  | protein_coding | 18 | 54318616  | 54698828  | WDR7    |
| ENSG00000091164 | 8.903197794 | 9.115138778 | protein_coding | 18 | 54264439  | 54318505  | TXNL1   |
| ENSG00000091262 | 2.471521042 | 2.721932731 | protein_coding | 16 | 16243422  | 16317351  | ABCC6   |
| ENSG00000091317 | 9.792299736 | 9.679125977 | protein_coding | 3  | 32522804  | 32544900  | CMTM6   |
| ENSG00000091409 | 11.14427291 | 8.200898549 | protein_coding | 2  | 173292082 | 173371181 | ITGA6   |
| ENSG00000091428 | 2.35979773  | 3.845183986 | protein_coding | 2  | 173600002 | 173917621 | RAPGEF4 |
| ENSG00000091436 | 10.34245657 | 9.561148156 | protein_coding | 2  | 173940163 | 174132738 |         |
| ENSG00000091482 | 2.35979773  | 3.368666104 | protein_coding | X  | 21724090  | 21776281  | SMPX    |
| ENSG00000091483 | 9.771983754 | 10.39775935 | protein_coding | 1  | 241660903 | 241683061 | FH      |
| ENSG00000091490 | 9.940436455 | 9.014632836 | protein_coding | 4  | 25749055  | 25865382  | SEL1L3  |
| ENSG00000091513 | 0.499066092 | 0.950786998 | protein_coding | 3  | 133464800 | 133497850 | TF      |
| ENSG00000091527 | 11.21144195 | 10.97000497 | protein_coding | 3  | 133292574 | 133309105 | CDV3    |
| ENSG00000091536 | 4.292665995 | 3.87606762  | protein_coding | 17 | 18012020  | 18083116  | MYO15A  |
| ENSG00000091542 | 11.09578492 | 11.50689105 | protein_coding | 17 | 18086392  | 18113268  | ALKBH5  |
| ENSG00000091583 | 0.499066092 | 0.390640832 | protein_coding | 17 | 64208148  | 64225556  | APOH    |
| ENSG00000091592 | 8.539709228 | 9.037011115 | protein_coding | 17 | 5402748   | 5487832   | NLRP1   |
| ENSG00000091622 | 7.575190993 | 7.699043321 | protein_coding | 17 | 6354583   | 6459877   | PITPNM3 |
| ENSG00000091640 | 7.995363019 | 8.926097022 | protein_coding | 17 | 4862523   | 4871132   | SPAG7   |
| ENSG00000091651 | 8.116326397 | 8.594734178 | protein_coding | 16 | 46723555  | 46732306  | ORC6    |
| ENSG00000091656 | 1.960915222 | 2.242360793 | protein_coding | 8  | 77593454  | 77779521  | ZFHX4   |
| ENSG00000091704 | 0.499066092 | 0           | protein_coding | 7  | 130020180 | 130027955 | CPA1    |
| ENSG00000091732 | 8.299696963 | 8.001751392 | protein_coding | 7  | 129658126 | 129691291 | ZC3HC1  |
| ENSG00000091831 | 0.869158192 | 0.697730409 | protein_coding | 6  | 151977826 | 152450754 | ESR1    |
| ENSG00000091844 | 4.842525946 | 3.453019579 | protein_coding | 6  | 153331857 | 153452384 | RGS17   |
| ENSG00000091879 | 0.869158192 | 1.518964905 | protein_coding | 8  | 6357172   | 6420930   | ANGPT2  |
| ENSG00000091947 | 8.124895791 | 7.892709342 | protein_coding | 17 | 42088559  | 42092417  | TMEM101 |
| ENSG00000091986 | 6.068837212 | 7.32390599  | protein_coding | 3  | 112323407 | 112368377 | CCDC80  |
| ENSG00000092010 | 10.62212519 | 11.22948558 | protein_coding | 14 | 24605367  | 24608176  | PSME1   |
| ENSG00000092020 | 7.434062125 | 7.844724842 | protein_coding | 14 | 35554673  | 35591723  | PPP2R3C |
| ENSG00000092036 | 7.440941622 | 8.085067518 | protein_coding | 14 | 23415437  | 23426370  | HAUS4   |
| ENSG00000092051 | 1.407729925 | 0.697730409 | protein_coding | 14 | 24037244  | 24048009  | JPH4    |
| ENSG00000092054 | 0           | 0.390640832 | protein_coding | 14 | 23881947  | 23904927  | MYH7    |
| ENSG00000092067 | 0           | 0.390640832 | protein_coding | 14 | 23586513  | 23588825  | CEBPE   |
| ENSG00000092068 | 4.842525946 | 3.368666104 | protein_coding | 14 | 23594504  | 23652883  | SLC7A8  |
| ENSG00000092094 | 8.235860718 | 9.069940847 | protein_coding | 14 | 20914570  | 20923264  | OSGEP   |
| ENSG00000092098 | 8.094677541 | 8.076782959 | protein_coding | 14 | 24615892  | 24629870  | RNF31   |
| ENSG00000092108 | 9.154055005 | 9.635231414 | protein_coding | 14 | 31091318  | 31205018  | SCFD1   |
| ENSG00000092140 | 8.448779323 | 8.898158883 | protein_coding | 14 | 31028329  | 31089269  | G2E3    |
| ENSG00000092148 | 10.60078215 | 10.69132855 | protein_coding | 14 | 31569318  | 31677010  | HECTD1  |
| ENSG00000092199 | 11.85750144 | 11.99261667 | protein_coding | 14 | 21677295  | 21737653  | HNRNPC  |

|                 |             |             |                |    |           |           |          |
|-----------------|-------------|-------------|----------------|----|-----------|-----------|----------|
| ENSG00000092200 | 3.448790144 | 3.183544561 | protein_coding | 14 | 21756098  | 21819460  | RPGRIP1  |
| ENSG00000092201 | 11.38579079 | 11.68490889 | protein_coding | 14 | 21819631  | 21852425  | SUPT16H  |
| ENSG00000092203 | 9.452682263 | 9.469195022 | protein_coding | 14 | 21944756  | 21967319  | TOX4     |
| ENSG00000092208 | 6.93675248  | 7.389591938 | protein_coding | 14 | 39583427  | 39606177  | GEMIN2   |
| ENSG00000092295 | 5.158541613 | 5.163066621 | protein_coding | 14 | 24718320  | 24733638  | TGM1     |
| ENSG00000092330 | 7.967047117 | 8.585420545 | protein_coding | 14 | 24708849  | 24711880  | TINF2    |
| ENSG00000092421 | 6.204385613 | 4.976162367 | protein_coding | 5  | 115779312 | 115910630 | SEMA6A   |
| ENSG00000092439 | 8.966547133 | 9.075772566 | protein_coding | 15 | 50844670  | 50979012  | TRPM7    |
| ENSG00000092445 | 8.717371959 | 7.91704449  | protein_coding | 15 | 41849873  | 41871536  | TYRO3    |
| ENSG00000092470 | 8.207901394 | 8.120964787 | protein_coding | 15 | 44119161  | 44160617  | WDR76    |
| ENSG00000092529 | 1.16343121  | 2.242360793 | protein_coding | 15 | 42640301  | 42704516  | CAPN3    |
| ENSG00000092531 | 8.171138658 | 8.696649474 | protein_coding | 15 | 42783431  | 42837547  | SNAP23   |
| ENSG00000092607 | 2.10647801  | 2.579085888 | protein_coding | 1  | 119425666 | 119532179 | TBX15    |
| ENSG00000092621 | 10.48406996 | 10.60062679 | protein_coding | 1  | 120202421 | 120286838 | PHGDH    |
| ENSG00000092758 | 3.502389126 | 2.242360793 | protein_coding | 20 | 61447596  | 61472511  | COL9A3   |
| ENSG00000092820 | 12.043434   | 11.33363257 | protein_coding | 6  | 159186773 | 159240444 | EZR      |
| ENSG00000092841 | 11.56414825 | 12.6902668  | protein_coding | 12 | 56551945  | 56557280  | MYL6     |
| ENSG00000092847 | 9.084367772 | 9.03187762  | protein_coding | 1  | 36335409  | 36395211  | EIF2C1   |
| ENSG00000092850 | 0           | 0.390640832 | protein_coding | 1  | 36549676  | 36553876  | TEKT2    |
| ENSG00000092853 | 7.73205733  | 8.0397549   | protein_coding | 1  | 36185819  | 36235568  | CLSPN    |
| ENSG00000092871 | 8.8704485   | 8.127396674 | protein_coding | 17 | 33333009  | 33416334  | RFFL     |
| ENSG00000092929 | 9.650379479 | 9.346378541 | protein_coding | 17 | 73823310  | 73840798  | UNC13D   |
| ENSG00000092931 | 6.449220685 | 6.403479675 | protein_coding | 17 | 74733783  | 74775336  | MFSD11   |
| ENSG00000092964 | 10.93422749 | 10.67988765 | protein_coding | 8  | 26371547  | 26515694  | DPYSL2   |
| ENSG00000092969 | 9.447567586 | 9.863317461 | protein_coding | 1  | 218519577 | 218617961 | TGFB2    |
| ENSG00000092978 | 7.363400307 | 7.53698153  | protein_coding | 1  | 217600334 | 217804424 | GPATCH2  |
| ENSG00000093000 | 9.69925397  | 9.791222404 | protein_coding | 22 | 45559722  | 45583892  | NUP50    |
| ENSG00000093009 | 8.98901727  | 9.395168311 | protein_coding | 22 | 19466982  | 19508135  | CDC45    |
| ENSG00000093010 | 9.959126666 | 10.3244275  | protein_coding | 22 | 19929130  | 19957498  | COMT     |
| ENSG00000093072 | 2.35979773  | 1.667587519 | protein_coding | 22 | 17660194  | 17739125  | CECR1    |
| ENSG00000093100 | 10.54799358 | 10.67000842 | protein_coding | 22 | 18270418  | 18507325  |          |
| ENSG00000093134 | 0.499066092 | 2.144285137 | protein_coding | 6  | 133043923 | 133055904 | VNN3     |
| ENSG00000093144 | 8.728660495 | 8.75700367  | protein_coding | 6  | 127609855 | 127664754 | ECHDC1   |
| ENSG00000093167 | 8.731468881 | 8.727671407 | protein_coding | 3  | 37094117  | 37225180  | LRRFIP2  |
| ENSG00000093183 | 8.930339658 | 8.866788836 | protein_coding | 3  | 42589461  | 42642572  | SEC22C   |
| ENSG00000093217 | 6.965663283 | 6.926693689 | protein_coding | 3  | 38388251  | 38462839  | XYLB     |
| ENSG00000094631 | 9.376683712 | 9.814328395 | protein_coding | X  | 48659784  | 48683392  | HDAC6    |
| ENSG00000094755 | 0.499066092 | 0           | protein_coding | 5  | 170190354 | 170241051 | GABRP    |
| ENSG00000094804 | 9.637710578 | 9.678031042 | protein_coding | 17 | 38443885  | 38459171  | CDC6     |
| ENSG00000094841 | 6.804311337 | 7.309836726 | protein_coding | X  | 74493920  | 74524435  | UPRT     |
| ENSG00000094880 | 8.956980309 | 9.003312166 | protein_coding | 5  | 137523339 | 137549032 | CDC23    |
| ENSG00000094914 | 9.022652927 | 9.385809746 | protein_coding | 12 | 53701240  | 53718648  | AAAS     |
| ENSG00000094916 | 11.52624036 | 11.57376546 | protein_coding | 12 | 54624724  | 54673955  | CBX5     |
| ENSG00000094963 | 0           | 0.390640832 | protein_coding | 1  | 171154347 | 171181822 | FMO2     |
| ENSG00000094975 | 8.197783135 | 8.379906558 | protein_coding | 1  | 172501489 | 172580971 | C1orf9   |
| ENSG00000095002 | 9.168633912 | 9.310086199 | protein_coding | 2  | 47630108  | 47789450  | MSH2     |
| ENSG00000095015 | 7.680671792 | 7.490337219 | protein_coding | 5  | 56111401  | 56191979  | MAP3K1   |
| ENSG00000095059 | 9.79766936  | 10.03691901 | protein_coding | 19 | 12786534  | 12792682  | DHPS     |
| ENSG00000095066 | 9.545769354 | 9.212881815 | protein_coding | 19 | 12873817  | 12886434  | HOOK2    |
| ENSG00000095110 | 0           | 0.697730409 | protein_coding | 11 | 114392437 | 114430617 | FAM55A   |
| ENSG00000095139 | 11.50936279 | 11.37712449 | protein_coding | 11 | 118443105 | 118473730 | ARCN1    |
| ENSG00000095203 | 7.461385447 | 6.310446475 | protein_coding | 9  | 111934254 | 112083244 | EPB41L4B |
| ENSG00000095209 | 8.295907473 | 8.359562039 | protein_coding | 9  | 108456825 | 108538893 | TMEM38B  |
| ENSG00000095261 | 9.507778518 | 9.117563863 | protein_coding | 9  | 123577774 | 123605229 | PSMD5    |
| ENSG00000095303 | 4.923348194 | 2.242360793 | protein_coding | 9  | 125132824 | 125157982 | PTGS1    |
| ENSG00000095319 | 11.45708792 | 11.42555489 | protein_coding | 9  | 131709977 | 131769375 | NUP188   |
| ENSG00000095321 | 9.854808855 | 9.824260193 | protein_coding | 9  | 131857073 | 131873468 | CRAT     |
| ENSG00000095370 | 3.950976309 | 2.788380093 | protein_coding | 9  | 130500596 | 130541020 | SH2D3C   |
| ENSG00000095380 | 9.105088364 | 9.225677649 | protein_coding | 9  | 100819021 | 100845357 | NANS     |
| ENSG00000095383 | 8.637276046 | 6.664555628 | protein_coding | 9  | 100961311 | 101017915 | TBC1D2   |
| ENSG00000095397 | 7.2307479   | 7.472765069 | protein_coding | 9  | 117164360 | 117267730 | DFNB31   |
| ENSG00000095464 | 2.238690726 | 1.802319292 | protein_coding | 10 | 95372345  | 95425767  | PDE6C    |
| ENSG00000095485 | 8.382430368 | 8.605140645 | protein_coding | 10 | 101992050 | 102027437 | CWF19L1  |

|                 |             |             |                |    |           |           |           |
|-----------------|-------------|-------------|----------------|----|-----------|-----------|-----------|
| ENSG00000095539 | 5.649112675 | 5.317302248 | protein_coding | 10 | 102729275 | 102745628 | SEMA4G    |
| ENSG00000095564 | 9.319038489 | 9.624472234 | protein_coding | 10 | 93683822  | 93790082  | BTAF1     |
| ENSG00000095574 | 7.91858278  | 8.053329862 | protein_coding | 10 | 124750322 | 124768333 | IKZF5     |
| ENSG00000095585 | 1.16343121  | 0           | protein_coding | 10 | 97951458  | 98031333  | BLNK      |
| ENSG00000095587 | 3.950976309 | 1.667587519 | protein_coding | 10 | 98124363  | 98273675  | TLL2      |
| ENSG00000095596 | 0           | 0.390640832 | protein_coding | 10 | 94833232  | 94837647  | CYP26A1   |
| ENSG00000095637 | 7.102117104 | 6.530239731 | protein_coding | 10 | 97071528  | 97321171  | SORBS1    |
| ENSG00000095713 | 0.499066092 | 0.390640832 | protein_coding | 10 | 99624757  | 99790585  | CRTAC1    |
| ENSG00000095739 | 7.671926738 | 8.847439299 | protein_coding | 10 | 28966271  | 28971868  | BAMBI     |
| ENSG00000095752 | 6.502803968 | 6.434933235 | protein_coding | 19 | 55875757  | 55881814  | IL11      |
| ENSG00000095777 | 0           | 0.390640832 | protein_coding | 10 | 26223196  | 26501456  | MYO3A     |
| ENSG00000095787 | 10.47404372 | 11.22311871 | protein_coding | 10 | 28821422  | 28909928  | WAC       |
| ENSG00000095794 | 6.998676229 | 8.677053487 | protein_coding | 10 | 35415719  | 35501886  | CREM      |
| ENSG00000095906 | 8.783815073 | 9.249460316 | protein_coding | 16 | 1832902   | 1839192   | NUBP2     |
| ENSG00000095917 | 1.616589159 | 2.788380093 | protein_coding | 16 | 1306060   | 1308532   | TPSD1     |
| ENSG00000095932 | 1.616589159 | 1.16600992  | protein_coding | 19 | 3474405   | 3480540   | C19orf77  |
| ENSG00000095951 | 8.895705979 | 9.090661058 | protein_coding | 6  | 12008995  | 12165232  | HIVEP1    |
| ENSG00000096060 | 9.677574326 | 9.623903733 | protein_coding | 6  | 35541362  | 35696360  | FKBP5     |
| ENSG00000096063 | 10.86462139 | 10.85795724 | protein_coding | 6  | 35800743  | 35889119  | SRPK1     |
| ENSG00000096070 | 8.741255403 | 9.090661058 | protein_coding | 6  | 36164521  | 36200567  | BRPF3     |
| ENSG00000096080 | 6.897280837 | 7.490337219 | protein_coding | 6  | 43639040  | 43655545  | MRPS18A   |
| ENSG00000096088 | 0.499066092 | 0.390640832 | protein_coding | 6  | 41704449  | 41721847  | PGC       |
| ENSG00000096092 | 7.222786417 | 7.632773539 | protein_coding | 6  | 52535907  | 52551386  | TMEM14A   |
| ENSG00000096093 | 7.149084042 | 7.560938532 | protein_coding | 6  | 52285106  | 52387892  | EFHC1     |
| ENSG00000096384 | 13.55762252 | 13.27139536 | protein_coding | 6  | 44214824  | 44221620  | HSP90AB1  |
| ENSG00000096395 | 0.869158192 | 1.925536307 | protein_coding | 6  | 33762450  | 33771788  | MLN       |
| ENSG00000096401 | 9.022652927 | 9.212125573 | protein_coding | 6  | 44355262  | 44418163  | CDC5L     |
| ENSG00000096433 | 12.14303164 | 11.80950586 | protein_coding | 6  | 33588522  | 33664351  | ITPR3     |
| ENSG00000096654 | 6.652556929 | 6.720932357 | protein_coding | 6  | 27418522  | 27440897  | ZNF184    |
| ENSG00000096696 | 11.66986148 | 9.881981209 | protein_coding | 6  | 7541808   | 7586950   | DSP       |
| ENSG00000096717 | 7.82964357  | 7.551403417 | protein_coding | 10 | 69644427  | 69678147  | SIRT1     |
| ENSG00000096746 | 10.36207036 | 10.30221393 | protein_coding | 10 | 70090931  | 70102948  | HNRNP3    |
| ENSG00000096872 | 5.60078458  | 6.568558581 | protein_coding | 9  | 26947037  | 27062928  | IFT74     |
| ENSG00000096968 | 4.593635215 | 5.09905904  | protein_coding | 9  | 4985033   | 5128183   | JAK2      |
| ENSG00000096996 | 2.35979773  | 2.039052734 | protein_coding | 19 | 18170371  | 18197697  | IL12RB1   |
| ENSG00000097007 | 11.11499978 | 11.25962481 | protein_coding | 9  | 133589268 | 133763062 | ABL1      |
| ENSG00000097021 | 9.89419068  | 10.11626465 | protein_coding | 1  | 6324333   | 6454451   | ACOT7     |
| ENSG00000097033 | 9.610509348 | 9.66813905  | protein_coding | 1  | 87170259  | 87213867  | SH3GLB1   |
| ENSG00000097046 | 7.35977471  | 7.848622884 | protein_coding | 1  | 91966404  | 91991321  | CDC7      |
| ENSG00000097096 | 3.698846687 | 3.453019579 | protein_coding | 1  | 85622556  | 85666729  | SYDE2     |
| ENSG00000099139 | 5.525114348 | 3.87606762  | protein_coding | 9  | 78505560  | 78977255  | PCSK5     |
| ENSG00000099194 | 12.92985885 | 11.54222083 | protein_coding | 10 | 102106877 | 102124591 | SCD       |
| ENSG00000099203 | 9.722731226 | 10.39942117 | protein_coding | 19 | 10943115  | 10946983  | TMED1     |
| ENSG00000099204 | 10.93696741 | 10.21280028 | protein_coding | 10 | 116190872 | 116444414 | ABLIM1    |
| ENSG00000099219 | 8.061582684 | 7.198175438 | protein_coding | 9  | 5765076   | 5833117   | ERMP1     |
| ENSG00000099246 | 9.095310434 | 10.25746684 | protein_coding | 10 | 27793197  | 27831143  | RAB18     |
| ENSG00000099250 | 9.985245743 | 10.73304628 | protein_coding | 10 | 33466420  | 33625190  | NRP1      |
| ENSG00000099251 | 3.830412367 | 3.714580548 | pseudogene     | 10 | 38645305  | 38667433  | HSD17B7P2 |
| ENSG00000099256 | 7.671926738 | 6.651226688 | protein_coding | 10 | 25137554  | 25241533  | PRTFDC1   |
| ENSG00000099260 | 1.616589159 | 2.242360793 | protein_coding | 1  | 100111499 | 100160097 | PALMD     |
| ENSG00000099282 | 9.256071182 | 8.056703738 | protein_coding | 10 | 71211229  | 71267425  | TSPAN15   |
| ENSG00000099284 | 1.616589159 | 1.667587519 | protein_coding | 10 | 71812552  | 71872032  | H2AFY2    |
| ENSG00000099290 | 4.800350936 | 5.018301917 | protein_coding | 10 | 51827648  | 51893269  | FAM21A    |
| ENSG00000099308 | 8.749591335 | 8.453421159 | protein_coding | 19 | 18208603  | 18262499  | MAST3     |
| ENSG00000099326 | 8.708847212 | 9.165228673 | protein_coding | 19 | 59073285  | 59084942  | MZF1      |
| ENSG00000099330 | 7.136425764 | 7.201227369 | protein_coding | 19 | 17337055  | 17340027  | OCEL1     |
| ENSG00000099331 | 11.05964614 | 10.87716715 | protein_coding | 19 | 17212466  | 17324103  | MYO9B     |
| ENSG00000099337 | 2.847891871 | 2.652276565 | protein_coding | 19 | 38810482  | 38819640  | KCNK6     |
| ENSG00000099338 | 3.274897671 | 2.579085888 | protein_coding | 19 | 38826415  | 38861589  | CATSPERG  |
| ENSG00000099341 | 10.39698226 | 10.72060396 | protein_coding | 19 | 38865176  | 38874464  | PSMD8     |
| ENSG00000099364 | 9.338510612 | 9.010289238 | protein_coding | 16 | 30934376  | 30960104  | FBXL19    |
| ENSG00000099365 | 5.331395195 | 5.516660875 | protein_coding | 16 | 31000577  | 31021949  | STX1B     |
| ENSG00000099377 | 8.15239992  | 8.704198827 | protein_coding | 16 | 30996519  | 31000473  | HSD3B7    |

|                 |             |             |                |    |           |           |          |
|-----------------|-------------|-------------|----------------|----|-----------|-----------|----------|
| ENSG00000099381 | 10.05640748 | 9.982080506 | protein_coding | 16 | 30968615  | 30996437  | SETD1A   |
| ENSG00000099385 | 7.68357507  | 8.073455769 | protein_coding | 16 | 30844947  | 30905696  | BCL7C    |
| ENSG00000099399 | 0           | 5.42565083  | protein_coding | X  | 30233677  | 30238206  | MAGEB2   |
| ENSG00000099617 | 1.16343121  | 1.353254395 | protein_coding | 19 | 1286168   | 1299944   | EFNA2    |
| ENSG00000099622 | 10.59037783 | 10.94700871 | protein_coding | 19 | 1269267   | 1274806   | CIRBP    |
| ENSG00000099624 | 9.961520764 | 9.87244022  | protein_coding | 19 | 1241749   | 1244823   | ATP5D    |
| ENSG00000099625 | 4.642199401 | 3.532712221 | protein_coding | 19 | 1229178   | 1237990   | C19orf26 |
| ENSG00000099769 | 1.960915222 | 2.039052734 | protein_coding | 16 | 1840414   | 1844972   | IGFALS   |
| ENSG00000099783 | 12.29717648 | 12.31348272 | protein_coding | 19 | 8509651   | 8553885   | HNRNPM   |
| ENSG00000099785 | 8.239811039 | 8.140175057 | protein_coding | 19 | 8478187   | 8503895   | 2-Mar    |
| ENSG00000099795 | 9.552931438 | 10.08480023 | protein_coding | 19 | 14676892  | 14682886  | NDUFB7   |
| ENSG00000099797 | 10.3836544  | 10.20901488 | protein_coding | 19 | 14640382  | 14676791  | TECR     |
| ENSG00000099800 | 9.611271904 | 9.927841127 | protein_coding | 19 | 2425630   | 2427875   | TIMM13   |
| ENSG00000099804 | 9.645920794 | 10.01193453 | protein_coding | 19 | 531733    | 542084    | CDC34    |
| ENSG00000099810 | 8.278730502 | 7.815148897 | protein_coding | 9  | 21802635  | 22032985  | MTAP     |
| ENSG00000099812 | 8.619193517 | 7.093659051 | protein_coding | 19 | 751146    | 764318    | C19orf21 |
| ENSG00000099814 | 11.13661291 | 9.844897037 | protein_coding | 14 | 105331617 | 105363089 | KIAA0284 |
| ENSG00000099817 | 11.44494811 | 11.43157717 | protein_coding | 19 | 1086578   | 1095391   | POLR2E   |
| ENSG00000099821 | 10.9786362  | 10.91553323 | protein_coding | 19 | 617223    | 633568    | POLRMT   |
| ENSG00000099822 | 4.999881834 | 4.604259349 | protein_coding | 19 | 589893    | 617157    | HCN2     |
| ENSG00000099834 | 4.593635215 | 3.368666104 | protein_coding | 11 | 616565    | 626078    | CDHR5    |
| ENSG00000099840 | 4.19837882  | 6.064512706 | protein_coding | 19 | 2096380   | 2099592   | IZUMO4   |
| ENSG00000099849 | 7.186405829 | 6.440109466 | protein_coding | 11 | 560404    | 564021    | RASSF7   |
| ENSG00000099860 | 9.256071182 | 9.20378064  | protein_coding | 19 | 2476123   | 2478257   | GADD45B  |
| ENSG00000099864 | 6.456028446 | 7.318294738 | protein_coding | 19 | 708953    | 748328    | PALM     |
| ENSG00000099866 | 2.762599152 | 2.851901313 | protein_coding | 19 | 496454    | 505340    | MADCAM1  |
| ENSG00000099869 | 0.499066092 | 1.353254395 | protein_coding | 11 | 2161731   | 2169894   | IGF2-AS  |
| ENSG00000099875 | 11.59454479 | 11.36101092 | protein_coding | 19 | 2037481   | 2051243   | MKNK2    |
| ENSG00000099882 | 0.499066092 | 0           | pseudogene     | 22 | 51112843  | 51171726  |          |
| ENSG00000099889 | 6.861834435 | 8.001751392 | protein_coding | 22 | 19957419  | 20004331  | ARVCF    |
| ENSG00000099899 | 9.074447906 | 9.349820553 | protein_coding | 22 | 20099389  | 20104915  | TRMT2A   |
| ENSG00000099901 | 10.28052518 | 10.24679846 | protein_coding | 22 | 20103461  | 20114878  | RANBP1   |
| ENSG00000099904 | 10.0355387  | 9.760517066 | protein_coding | 22 | 20116979  | 20135530  | ZDHHC8   |
| ENSG00000099910 | 7.663128351 | 8.518485187 | protein_coding | 22 | 20783528  | 20850170  | KLHL22   |
| ENSG00000099917 | 11.01510727 | 10.98977517 | protein_coding | 22 | 20850200  | 20941919  | MED15    |
| ENSG00000099937 | 1.16343121  | 1.518964905 | protein_coding | 22 | 21128167  | 21142008  | SERPIND1 |
| ENSG00000099940 | 8.263288478 | 8.143352046 | protein_coding | 22 | 21213271  | 21245502  | SNAP29   |
| ENSG00000099942 | 10.64836751 | 10.53107824 | protein_coding | 22 | 21271714  | 21308037  | CRKL     |
| ENSG00000099949 | 9.870181217 | 10.25453171 | protein_coding | 22 | 21322090  | 21353327  | LZTR1    |
| ENSG00000099953 | 5.4452544   | 6.136428444 | protein_coding | 22 | 24110413  | 24126503  | MMP11    |
| ENSG00000099954 | 7.246540262 | 7.119700263 | protein_coding | 22 | 17840837  | 18033845  | CECR2    |
| ENSG00000099956 | 10.00336794 | 10.35009017 | protein_coding | 22 | 24129150  | 24176703  | SMARCB1  |
| ENSG00000099957 | 7.144876945 | 7.354383726 | protein_coding | 22 | 21369316  | 21383119  | P2RX6    |
| ENSG00000099958 | 5.575999561 | 5.734544355 | protein_coding | 22 | 24176690  | 24181315  | DERL3    |
| ENSG00000099960 | 3.004694206 | 1.518964905 | protein_coding | 22 | 21383007  | 21387129  | SLC7A4   |
| ENSG00000099968 | 10.14121895 | 10.08314681 | protein_coding | 22 | 18111621  | 18213388  | BCL2L13  |
| ENSG00000099974 | 4.409500985 | 5.137803333 | protein_coding | 22 | 24309089  | 24314721  | DDTL     |
| ENSG00000099977 | 4.409500985 | 5.09905904  | protein_coding | 22 | 24313554  | 24322660  | DDT      |
| ENSG00000099984 | 4.352265886 | 5.271576845 | protein_coding | 22 | 24322339  | 24326106  | GSTT2    |
| ENSG00000099985 | 1.616589159 | 1.518964905 | protein_coding | 22 | 30658818  | 30662829  | OSM      |
| ENSG00000099991 | 10.38231481 | 10.08438705 | protein_coding | 22 | 24407642  | 24574596  | CABIN1   |
| ENSG00000099992 | 8.369868254 | 8.414504719 | protein_coding | 22 | 30687979  | 30723035  | TBC1D10A |
| ENSG00000099994 | 5.072559152 | 3.411459265 | protein_coding | 22 | 24577227  | 24585078  | SUSD2    |
| ENSG00000099995 | 11.21646228 | 11.09791564 | protein_coding | 22 | 30727979  | 30752936  | SF3A1    |
| ENSG00000099998 | 3.448790144 | 1.518964905 | protein_coding | 22 | 24615622  | 24641110  | GGT5     |
| ENSG00000099999 | 8.054871625 | 8.660517685 | protein_coding | 22 | 30773808  | 30817760  | RNF215   |
| ENSG00000100003 | 9.167597433 | 8.675956977 | protein_coding | 22 | 30792846  | 30820603  | SEC14L2  |
| ENSG00000100012 | 0.869158192 | 0           | protein_coding | 22 | 30843946  | 30868036  | SEC14L3  |
| ENSG00000100014 | 8.647720461 | 9.249460316 | protein_coding | 22 | 24666786  | 24813707  | SPECC1L  |
| ENSG00000100023 | 9.740963079 | 9.771851712 | protein_coding | 22 | 22006559  | 22052565  | PPIL2    |
| ENSG00000100024 | 3.274897671 | 1.353254395 | protein_coding | 22 | 24863206  | 24924358  | UPB1     |
| ENSG00000100027 | 3.871730003 | 4.903073497 | protein_coding | 22 | 22051833  | 22090123  | YPEL1    |
| ENSG00000100028 | 6.298293508 | 6.485878328 | protein_coding | 22 | 24951471  | 24978020  | SNRPD3   |



|                 |             |             |                  |    |          |          |          |
|-----------------|-------------|-------------|------------------|----|----------|----------|----------|
| ENSG00000100029 | 11.80531025 | 12.05235468 | protein_coding   | 22 | 30972615 | 31003070 | PES1     |
| ENSG00000100030 | 10.899376   | 10.83603586 | protein_coding   | 22 | 22108789 | 22221970 | MAPK1    |
| ENSG00000100031 | 4.903563137 | 3.493416095 | protein_coding   | 22 | 24979718 | 25024972 | GGT1     |
| ENSG00000100033 | 1.799000381 | 1.925536307 | protein_coding   | 22 | 18900294 | 18924066 | PRODH    |
| ENSG00000100034 | 9.904803739 | 9.905561226 | protein_coding   | 22 | 22273793 | 22307209 | PPM1F    |
| ENSG00000100036 | 7.537174746 | 7.688207601 | protein_coding   | 22 | 31031639 | 31065003 | SLC35E4  |
| ENSG00000100038 | 8.539709228 | 8.920552509 | protein_coding   | 22 | 22311397 | 22337213 | TOP3B    |
| ENSG00000100053 | 3.448790144 | 2.144285137 | protein_coding   | 22 | 25595817 | 25603330 | CRYBB3   |
| ENSG00000100055 | 5.054730169 | 4.7279204   | protein_coding   | 22 | 37678068 | 37711389 | CYTH4    |
| ENSG00000100056 | 7.997697782 | 8.280968702 | protein_coding   | 22 | 19117792 | 19132197 | DGCR14   |
| ENSG00000100058 | 6.171673665 | 6.445267191 | pseudogene       | 22 | 25844072 | 25916821 | CRYBB2P1 |
| ENSG00000100060 | 6.965663283 | 6.995112131 | protein_coding   | 22 | 37865101 | 37882439 | MFNG     |
| ENSG00000100065 | 9.702835781 | 9.569438796 | protein_coding   | 22 | 37886400 | 37915549 | CARD10   |
| ENSG00000100068 | 6.25990527  | 6.252780742 | protein_coding   | 22 | 25747385 | 25801344 | LRP5L    |
| ENSG00000100075 | 10.12368915 | 9.617635386 | protein_coding   | 22 | 19163095 | 19166343 | SLC25A1  |
| ENSG00000100077 | 6.749949642 | 5.901455548 | protein_coding   | 22 | 25960816 | 26118985 | ADRBK2   |
| ENSG00000100078 | 0.499066092 | 0.697730409 | protein_coding   | 22 | 31530795 | 31536593 | PLA2G3   |
| ENSG00000100079 | 4.642199401 | 3.027231696 | protein_coding   | 22 | 37966255 | 37978623 | LGALS2   |
| ENSG00000100083 | 10.01378699 | 10.07734489 | protein_coding   | 22 | 38004481 | 38029571 | GGA1     |
| ENSG00000100084 | 8.185546801 | 8.14810445  | protein_coding   | 22 | 19318221 | 19435224 | HIRA     |
| ENSG00000100092 | 8.177331204 | 6.142791909 | protein_coding   | 22 | 38030661 | 38062939 | SH3BP1   |
| ENSG00000100097 | 12.99762442 | 13.3537158  | protein_coding   | 22 | 38071615 | 38075813 | LGALS1   |
| ENSG00000100099 | 9.252165193 | 9.293022915 | protein_coding   | 22 | 26839389 | 26879820 | HPS4     |
| ENSG00000100100 | 6.782811835 | 7.329495501 | protein_coding   | 22 | 31677579 | 31688520 | PIK3IP1  |
| ENSG00000100104 | 7.37781226  | 7.621426466 | protein_coding   | 22 | 26879843 | 26887899 | SRRD     |
| ENSG00000100105 | 9.078865158 | 9.189251987 | protein_coding   | 22 | 31721790 | 31742218 | PATZ1    |
| ENSG00000100106 | 8.025424129 | 7.512619979 | protein_coding   | 22 | 38093011 | 38172563 | TRIOBP   |
| ENSG00000100109 | 9.473800365 | 9.433305485 | protein_coding   | 22 | 26887191 | 26908471 | TFIP11   |
| ENSG00000100116 | 8.549290825 | 8.940779054 | protein_coding   | 22 | 38203912 | 38213183 | GCAT     |
| ENSG00000100124 | 8.101206377 | 8.298174303 | protein_coding   | 22 | 38226862 | 38240438 | ANKRD54  |
| ENSG00000100129 | 11.52745281 | 11.46195347 | protein_coding   | 22 | 38244875 | 38285414 | EIF3L    |
| ENSG00000100138 | 10.86558043 | 11.08702611 | protein_coding   | 22 | 42069934 | 42086508 | NHP2L1   |
| ENSG00000100139 | 10.49154418 | 9.92368977  | protein_coding   | 22 | 38301664 | 38338829 | MICALL1  |
| ENSG00000100142 | 8.949763328 | 9.409093306 | protein_coding   | 22 | 38348614 | 38437113 | POLR2F   |
| ENSG00000100146 | 1.16343121  | 1.925536307 | protein_coding   | 22 | 38366693 | 38383429 | SOX10    |
| ENSG00000100147 | 6.146643566 | 5.995870484 | protein_coding   | 22 | 42196683 | 42222303 | CCDC134  |
| ENSG00000100150 | 7.824391858 | 7.905863867 | protein_coding   | 22 | 32149944 | 32303001 | DEPDC5   |
| ENSG00000100151 | 7.845284967 | 7.980592361 | protein_coding   | 22 | 38452318 | 38471708 | PICK1    |
| ENSG00000100154 | 8.344411036 | 8.17939326  | protein_coding   | 22 | 28374004 | 29075853 | TTC28    |
| ENSG00000100156 | 2.928422289 | 3.133298822 | protein_coding   | 22 | 38474141 | 38480100 | SLC16A8  |
| ENSG00000100162 | 8.118473522 | 8.601680156 | protein_coding   | 22 | 42334725 | 42343168 | CENPM    |
| ENSG00000100167 | 2.671945279 | 1.667587519 | protein_coding   | 22 | 42372276 | 42394225 | 3-sep    |
| ENSG00000100170 | 1.16343121  | 0           | protein_coding   | 22 | 32439019 | 32509016 | SLC5A1   |
| ENSG00000100181 | 0           | 0.697730409 | processed_transc | 22 | 17082777 | 17179521 | TPTEP1   |
| ENSG00000100191 | 5.684325135 | 5.816437314 | protein_coding   | 22 | 32614465 | 32651328 | SLC5A4   |
| ENSG00000100196 | 8.771587845 | 8.418443943 | protein_coding   | 22 | 38864067 | 38879452 | KDELRL3  |
| ENSG00000100197 | 4.491309013 | 4.342020395 | protein_coding   | 22 | 42522501 | 42540472 | CYP2D6   |
| ENSG00000100201 | 11.99444363 | 12.19390275 | protein_coding   | 22 | 38879445 | 38903665 | DDX17    |
| ENSG00000100206 | 4.464551814 | 4.794098771 | protein_coding   | 22 | 38914954 | 38966291 | DMC1     |
| ENSG00000100207 | 10.4075566  | 10.03990532 | protein_coding   | 22 | 42556019 | 42611448 | TCF20    |
| ENSG00000100209 | 6.640654398 | 6.82352253  | protein_coding   | 22 | 29138019 | 29153503 | HSCB     |
| ENSG00000100211 | 7.337827682 | 7.741590246 | protein_coding   | 22 | 39052641 | 39069859 | CBY1     |
| ENSG00000100216 | 10.38632984 | 10.16318938 | protein_coding   | 22 | 39077953 | 39080818 | TOMM22   |
| ENSG00000100218 | 0.499066092 | 1.353254395 | protein_coding   | 22 | 23401593 | 23487208 | RTDR1    |
| ENSG00000100219 | 11.25478858 | 11.50009186 | protein_coding   | 22 | 29190543 | 29196585 | XBP1     |
| ENSG00000100220 | 11.0197097  | 11.15333184 | protein_coding   | 22 | 32783569 | 32808242 | C22orf28 |
| ENSG00000100221 | 9.96986896  | 10.05516663 | protein_coding   | 22 | 39081548 | 39097561 | JOSD1    |
| ENSG00000100225 | 10.92505666 | 11.05385548 | protein_coding   | 22 | 32870663 | 32894818 | FBXO7    |
| ENSG00000100226 | 9.532948302 | 9.350507971 | protein_coding   | 22 | 39101728 | 39134304 | GTPBP1   |
| ENSG00000100227 | 10.22231885 | 10.25526605 | protein_coding   | 22 | 42979727 | 43010968 | POLDIP3  |
| ENSG00000100228 | 4.593635215 | 5.072639111 | protein_coding   | 22 | 23487513 | 23506537 | RAB36    |
| ENSG00000100234 | 0           | 0.950786998 | protein_coding   | 22 | 33197687 | 33259030 | TIMP3    |
| ENSG00000100239 | 9.867630505 | 10.00365497 | protein_coding   | 22 | 50781733 | 50883514 | PPP6R2   |

|                 |             |             |                |    |          |          |          |
|-----------------|-------------|-------------|----------------|----|----------|----------|----------|
| ENSG00000100241 | 11.42361729 | 11.3450603  | protein_coding | 22 | 50885184 | 50913464 | SBF1     |
| ENSG00000100242 | 10.61453887 | 10.58610742 | protein_coding | 22 | 39130730 | 39190148 | SUN2     |
| ENSG00000100243 | 11.81063176 | 11.86131148 | protein_coding | 22 | 43013846 | 43045574 | CYB5R3   |
| ENSG00000100246 | 7.402691859 | 7.219404604 | protein_coding | 22 | 39174513 | 39190203 | DNAL4    |
| ENSG00000100253 | 3.004694206 | 2.971122874 | protein_coding | 22 | 50925213 | 50929077 | MIOX     |
| ENSG00000100258 | 10.11188316 | 10.38238014 | protein_coding | 22 | 50941376 | 50946135 | LMF2     |
| ENSG00000100263 | 9.065572619 | 9.365548888 | protein_coding | 22 | 29655841 | 29664198 | RHBDD3   |
| ENSG00000100266 | 10.23919023 | 10.14586997 | protein_coding | 22 | 43231418 | 43411151 | PACIN2   |
| ENSG00000100271 | 6.023726639 | 6.966698819 | protein_coding | 22 | 43414609 | 43485434 | TLL1     |
| ENSG00000100276 | 2.10647801  | 2.971122874 | protein_coding | 22 | 29708922 | 29711745 | RASL10A  |
| ENSG00000100280 | 12.11373306 | 12.07571958 | protein_coding | 22 | 29723669 | 29819168 | AP1B1    |
| ENSG00000100281 | 8.844740944 | 8.983949389 | protein_coding | 22 | 35653445 | 35691800 | HMGXB4   |
| ENSG00000100284 | 9.490475063 | 9.795772355 | protein_coding | 22 | 35695268 | 35743985 | TOM1     |
| ENSG00000100285 | 1.16343121  | 2.242360793 | protein_coding | 22 | 29876181 | 29887379 | NEFH     |
| ENSG00000100288 | 4.464551814 | 4.841813558 | protein_coding | 22 | 51017378 | 51039884 | CHKB     |
| ENSG00000100290 | 7.186405829 | 4.547834947 | protein_coding | 22 | 43506754 | 43525718 | BIK      |
| ENSG00000100292 | 9.323698603 | 8.983063058 | protein_coding | 22 | 35776354 | 35790207 | HMOX1    |
| ENSG00000100294 | 8.382430368 | 8.395978102 | protein_coding | 22 | 43528886 | 43539400 | MCAT     |
| ENSG00000100296 | 10.9652776  | 11.30855749 | protein_coding | 22 | 29901868 | 29951205 | THOC5    |
| ENSG00000100297 | 10.73907363 | 10.73278266 | protein_coding | 22 | 35796056 | 35820495 | MCM5     |
| ENSG00000100298 | 1.616589159 | 0.390640832 | protein_coding | 22 | 39493229 | 39500072 | APOBEC3H |
| ENSG00000100299 | 8.668385155 | 9.079923694 | protein_coding | 22 | 51063446 | 51066607 | ARSA     |
| ENSG00000100300 | 10.99654928 | 11.3529719  | protein_coding | 22 | 43547520 | 43559248 | TSPO     |
| ENSG00000100302 | 8.577659618 | 7.778838337 | protein_coding | 22 | 35936915 | 35950048 | RASD2    |
| ENSG00000100304 | 11.5651325  | 11.26619728 | protein_coding | 22 | 43562628 | 43583139 | TLL12    |
| ENSG00000100307 | 6.846372398 | 7.077141316 | protein_coding | 22 | 39516172 | 39548679 | CBX7     |
| ENSG00000100311 | 7.250461488 | 6.505763096 | protein_coding | 22 | 39619364 | 39640756 | PDGFB    |
| ENSG00000100312 | 2.762599152 | 1.353254395 | protein_coding | 22 | 51176624 | 51183762 | ACR      |
| ENSG00000100314 | 2.671945279 | 2.420525079 | protein_coding | 22 | 30116073 | 30127828 | CABP7    |
| ENSG00000100316 | 13.32652848 | 13.41279083 | protein_coding | 22 | 39708887 | 39716394 | RPL3     |
| ENSG00000100319 | 7.657232808 | 8.001751392 | protein_coding | 22 | 30126945 | 30163000 | ZMAT5    |
| ENSG00000100320 | 10.83195583 | 10.67961414 | protein_coding | 22 | 36134783 | 36424473 | RBFOX2   |
| ENSG00000100321 | 5.239686603 | 5.80042639  | protein_coding | 22 | 39745930 | 39781593 | SYNGR1   |
| ENSG00000100324 | 8.643253539 | 8.83570377  | protein_coding | 22 | 39795746 | 39913596 | TAB1     |
| ENSG00000100325 | 10.70411607 | 10.89306095 | protein_coding | 22 | 30184597 | 30234271 | ASCC2    |
| ENSG00000100330 | 10.27427957 | 10.4845527  | protein_coding | 22 | 30279144 | 31521442 | MTMR3    |
| ENSG00000100335 | 10.15174033 | 9.83707015  | protein_coding | 22 | 39895437 | 39914137 | SMCR7L   |
| ENSG00000100336 | 0.499066092 | 0.390640832 | protein_coding | 22 | 36585172 | 36600886 | APOL4    |
| ENSG00000100342 | 9.357723414 | 9.938853364 | protein_coding | 22 | 36649056 | 36663576 | APOL1    |
| ENSG00000100344 | 6.414691513 | 4.903073497 | protein_coding | 22 | 44319619 | 44360368 | PNPLA3   |
| ENSG00000100345 | 15.03514795 | 15.40942747 | protein_coding | 22 | 36677323 | 36784063 | MYH9     |
| ENSG00000100346 | 3.502389126 | 2.721932731 | protein_coding | 22 | 39966758 | 40085742 | CACNA1I  |
| ENSG00000100347 | 9.355904607 | 9.445582628 | protein_coding | 22 | 44351301 | 44406411 | SAMM50   |
| ENSG00000100348 | 9.520012288 | 9.840499639 | protein_coding | 22 | 36863083 | 36878077 | TXN2     |
| ENSG00000100350 | 10.13274625 | 10.6252633  | protein_coding | 22 | 36883237 | 36903148 | FOXRED2  |
| ENSG00000100351 | 0.869158192 | 1.667587519 | protein_coding | 22 | 40297086 | 40369725 | GRAP2    |
| ENSG00000100353 | 11.79796098 | 11.72389497 | protein_coding | 22 | 36906897 | 36925483 | EIF3D    |
| ENSG00000100354 | 9.123378905 | 9.491180897 | protein_coding | 22 | 40440821 | 40731811 | TNRC6B   |
| ENSG00000100359 | 9.776749803 | 9.775951422 | protein_coding | 22 | 40766595 | 40806122 | SGSM3    |
| ENSG00000100360 | 8.120617457 | 8.576046394 | protein_coding | 22 | 37154246 | 37172300 | IFT27    |
| ENSG00000100364 | 10.89468575 | 11.00709988 | protein_coding | 22 | 45588114 | 45636650 | KIAA0930 |
| ENSG00000100365 | 0.499066092 | 1.16600992  | protein_coding | 22 | 37257030 | 37274057 | NCF4     |
| ENSG00000100372 | 8.303476525 | 8.46235258  | protein_coding | 22 | 41165634 | 41215403 | SLC25A17 |
| ENSG00000100373 | 0.499066092 | 0           | protein_coding | 22 | 45680863 | 45691755 | UPK3A    |
| ENSG00000100376 | 8.018542337 | 7.931818465 | protein_coding | 22 | 45704849 | 45737836 | FAM118A  |
| ENSG00000100379 | 8.735671237 | 8.951693347 | protein_coding | 22 | 37447779 | 37459430 | KCTD17   |
| ENSG00000100380 | 9.787584866 | 9.934733619 | protein_coding | 22 | 41220539 | 41253026 | ST13     |
| ENSG00000100385 | 3.393122761 | 3.96493948  | protein_coding | 22 | 37515126 | 37571094 | IL2RB    |
| ENSG00000100387 | 5.948480845 | 6.695185789 | protein_coding | 22 | 41347351 | 41369313 | RBX1     |
| ENSG00000100393 | 10.48947188 | 10.27603922 | protein_coding | 22 | 41487790 | 41576081 | EP300    |
| ENSG00000100395 | 9.160321156 | 9.20301961  | protein_coding | 22 | 41601209 | 41627275 | L3MBTL2  |
| ENSG00000100399 | 2.35979773  | 2.912743273 | protein_coding | 22 | 41625517 | 41636938 | CHADL    |
| ENSG00000100401 | 12.14868931 | 11.96460276 | protein_coding | 22 | 41641615 | 41698963 | RANGAP1  |

|                 |             |             |                |    |          |          |           |
|-----------------|-------------|-------------|----------------|----|----------|----------|-----------|
| ENSG00000100403 | 11.55664594 | 11.74522334 | protein_coding | 22 | 41697526 | 41756151 | ZC3H7B    |
| ENSG00000100410 | 8.131289597 | 8.259169069 | protein_coding | 22 | 41855721 | 41864729 | PHF5A     |
| ENSG00000100412 | 9.751377591 | 9.418302523 | protein_coding | 22 | 41865117 | 41924993 | ACO2      |
| ENSG00000100413 | 9.305909516 | 9.243551304 | protein_coding | 22 | 41921808 | 41940610 | POLR3H    |
| ENSG00000100416 | 8.961771651 | 9.41961334  | protein_coding | 22 | 46726772 | 46753237 | TRMU      |
| ENSG00000100417 | 7.67484765  | 8.120964787 | protein_coding | 22 | 41972898 | 41985894 | PMM1      |
| ENSG00000100418 | 10.27764595 | 10.4464781  | protein_coding | 22 | 41994032 | 42017100 | PPPDE2    |
| ENSG00000100422 | 8.539709228 | 8.625731057 | protein_coding | 22 | 47080308 | 47134158 | CERK      |
| ENSG00000100425 | 8.94855698  | 8.724493    | protein_coding | 22 | 50166931 | 50221160 | BRD1      |
| ENSG00000100426 | 9.194306789 | 9.11432951  | protein_coding | 22 | 50247490 | 50282090 | ZBED4     |
| ENSG00000100427 | 1.407729925 | 1.353254395 | protein_coding | 22 | 50497820 | 50524331 | MLC1      |
| ENSG00000100429 | 6.138202758 | 6.016808232 | protein_coding | 22 | 50683612 | 50689834 | HDAC10    |
| ENSG00000100433 | 2.762599152 | 0           | protein_coding | 14 | 88649113 | 88793251 | KCNK10    |
| ENSG00000100439 | 9.311550855 | 9.409753061 | protein_coding | 14 | 23067146 | 23081265 | ABHD4     |
| ENSG00000100441 | 8.967738537 | 9.411071665 | protein_coding | 14 | 24898492 | 24910540 | KHNYN     |
| ENSG00000100442 | 8.554057865 | 8.907531839 | protein_coding | 14 | 45584803 | 45604522 | FKBP3     |
| ENSG00000100445 | 5.977159882 | 6.729413443 | protein_coding | 14 | 24908972 | 24912111 | SDR39U1   |
| ENSG00000100461 | 9.786910053 | 10.07609858 | protein_coding | 14 | 23369854 | 23388396 | RBM23     |
| ENSG00000100462 | 10.01263302 | 10.26441394 | protein_coding | 14 | 23389720 | 23398794 | PRMT5     |
| ENSG00000100473 | 2.57521082  | 1.802319292 | protein_coding | 14 | 31343720 | 31364271 | COCH      |
| ENSG00000100478 | 4.821592551 | 4.7279204   | protein_coding | 14 | 31494312 | 31562818 | AP4S1     |
| ENSG00000100479 | 7.416718478 | 7.982367515 | protein_coding | 14 | 50110273 | 50155140 | POLE2     |
| ENSG00000100483 | 6.112579918 | 6.349483465 | protein_coding | 14 | 50575350 | 50583318 | METTL21D  |
| ENSG00000100485 | 8.316627558 | 8.458531597 | protein_coding | 14 | 50583847 | 50698276 | SOS2      |
| ENSG00000100490 | 6.482942724 | 6.198834244 | protein_coding | 14 | 50796310 | 50883179 | CDKL1     |
| ENSG00000100503 | 9.377580398 | 9.599243793 | protein_coding | 14 | 51186481 | 51297839 | NIN       |
| ENSG00000100504 | 11.60281194 | 11.06206254 | protein_coding | 14 | 51324609 | 51411454 | PYGL      |
| ENSG00000100505 | 6.965663283 | 6.787424764 | protein_coding | 14 | 51441980 | 51562779 | TRIM9     |
| ENSG00000100519 | 9.089849478 | 9.215148166 | protein_coding | 14 | 53173890 | 53195305 | PSMC6     |
| ENSG00000100522 | 8.994872754 | 9.025865365 | protein_coding | 14 | 53241912 | 53258386 | GPNPAT1   |
| ENSG00000100523 | 7.981274537 | 8.481307156 | protein_coding | 14 | 53510686 | 53620000 | DDHD1     |
| ENSG00000100526 | 8.507303029 | 8.608592853 | protein_coding | 14 | 54863567 | 54886936 | CDKN3     |
| ENSG00000100528 | 9.078865158 | 9.551614431 | protein_coding | 14 | 54893654 | 54908149 | CNIH      |
| ENSG00000100532 | 6.204385613 | 6.673373662 | protein_coding | 14 | 54976530 | 55005567 | CGRRF1    |
| ENSG00000100554 | 9.177928864 | 9.982524041 | protein_coding | 14 | 67761088 | 67826982 | ATP6V1D   |
| ENSG00000100557 | 0           | 0.390640832 | protein_coding | 14 | 57936019 | 57960585 | C14orf105 |
| ENSG00000100558 | 9.165522239 | 8.551145468 | protein_coding | 14 | 67853700 | 67878917 | PLEK2     |
| ENSG00000100564 | 7.698004462 | 7.883239271 | protein_coding | 14 | 68048672 | 68067004 | PIGH      |
| ENSG00000100567 | 10.70483073 | 11.25761057 | protein_coding | 14 | 58711549 | 58738730 | PSMA3     |
| ENSG00000100568 | 9.592086026 | 9.732839523 | protein_coding | 14 | 68113792 | 68141548 | VTI1B     |
| ENSG00000100575 | 8.359012976 | 8.599368544 | protein_coding | 14 | 58875212 | 58894332 | TIMM9     |
| ENSG00000100577 | 8.35173048  | 9.084889332 | protein_coding | 14 | 77787227 | 77797940 | GSTZ1     |
| ENSG00000100578 | 9.223526019 | 9.590541354 | protein_coding | 14 | 58894103 | 59015216 | KIAA0586  |
| ENSG00000100580 | 10.02241241 | 10.11302738 | protein_coding | 14 | 77801364 | 77843452 | TMED8     |
| ENSG00000100583 | 4.352265886 | 4.888000647 | protein_coding | 14 | 77843032 | 77857840 | SAMD15    |
| ENSG00000100591 | 11.38177426 | 11.7133786  | protein_coding | 14 | 77924213 | 77935817 | AHSA1     |
| ENSG00000100592 | 8.977234519 | 9.078264676 | protein_coding | 14 | 59655364 | 59838123 | DAAM1     |
| ENSG00000100593 | 1.16343121  | 0.390640832 | protein_coding | 14 | 77940740 | 77965210 | ISM2      |
| ENSG00000100596 | 10.04234008 | 10.12673589 | protein_coding | 14 | 77972340 | 78083116 | SPTLC2    |
| ENSG00000100599 | 9.267726094 | 8.614328238 | protein_coding | 14 | 92980118 | 93155339 | RIN3      |
| ENSG00000100600 | 10.53398641 | 10.05516663 | protein_coding | 14 | 93170152 | 93215047 | LGMN      |
| ENSG00000100601 | 7.348842929 | 7.862183683 | protein_coding | 14 | 78138747 | 78174363 | ALKBH1    |
| ENSG00000100603 | 10.27427957 | 10.55065289 | protein_coding | 14 | 78183942 | 78227550 | SNW1      |
| ENSG00000100604 | 2.10647801  | 1.16600992  | protein_coding | 14 | 93389425 | 93401638 | CHGA      |
| ENSG00000100605 | 10.64091829 | 9.147933883 | protein_coding | 14 | 93403259 | 93582665 | ITPK1     |
| ENSG00000100612 | 9.70569484  | 9.863799047 | protein_coding | 14 | 60610838 | 60636574 | DHRS7     |
| ENSG00000100614 | 9.742356032 | 10.25893217 | protein_coding | 14 | 60712470 | 60765805 | PPM1A     |
| ENSG00000100625 | 8.925442603 | 8.755966294 | protein_coding | 14 | 61176246 | 61191066 | SIX4      |
| ENSG00000100626 | 2.35979773  | 3.608232228 | protein_coding | 14 | 69725994 | 69821183 | GALNTL1   |
| ENSG00000100628 | 3.554067925 | 2.334191469 | protein_coding | 14 | 94400499 | 94443137 | ASB2      |
| ENSG00000100629 | 8.068262669 | 8.220584723 | protein_coding | 14 | 80943330 | 81425861 | CEP128    |
| ENSG00000100632 | 10.24608033 | 10.92733077 | protein_coding | 14 | 69846848 | 69865344 | ERH       |
| ENSG00000100644 | 12.43868722 | 11.4940384  | protein_coding | 14 | 62162231 | 62214976 | HIF1A     |

|                 |             |             |                |    |           |           |           |
|-----------------|-------------|-------------|----------------|----|-----------|-----------|-----------|
| ENSG00000100647 | 9.430386506 | 9.510378177 | protein_coding | 14 | 70078313  | 70181859  | KIAA0247  |
| ENSG00000100650 | 11.1505816  | 11.3196583  | protein_coding | 14 | 70193617  | 70238722  | SRSF5     |
| ENSG00000100652 | 2.671945279 | 1.353254395 | protein_coding | 14 | 70242134  | 70264006  | SLC10A1   |
| ENSG00000100664 | 11.56690245 | 10.68343859 | protein_coding | 14 | 103799881 | 103811362 | EIF5      |
| ENSG00000100665 | 0.499066092 | 0.390640832 | protein_coding | 14 | 95027428  | 95036250  | SERPINA4  |
| ENSG00000100697 | 10.18541435 | 9.494294562 | protein_coding | 14 | 95552565  | 95624347  | DICER1    |
| ENSG00000100711 | 8.415986232 | 7.946442679 | protein_coding | 14 | 104182067 | 104200005 | ZFYVE21   |
| ENSG00000100714 | 11.68967225 | 12.00238191 | protein_coding | 14 | 64854749  | 64926725  | MTHFD1    |
| ENSG00000100722 | 10.18848346 | 9.865723786 | protein_coding | 14 | 89029253  | 89079853  | ZC3H14    |
| ENSG00000100726 | 9.849648119 | 9.931061721 | protein_coding | 16 | 1543345   | 1560458   | TELO2     |
| ENSG00000100731 | 10.73207945 | 10.96911003 | protein_coding | 14 | 71374122  | 71582099  | PCNX      |
| ENSG00000100739 | 7.517784241 | 5.886365696 | protein_coding | 14 | 96722161  | 96735304  | BDKRB1    |
| ENSG00000100744 | 8.271030151 | 7.410839058 | protein_coding | 14 | 96829814  | 96853625  | C14orf129 |
| ENSG00000100749 | 8.487504052 | 8.044860491 | protein_coding | 14 | 97263641  | 97398059  | VRK1      |
| ENSG00000100764 | 8.715954662 | 8.305283181 | protein_coding | 14 | 90722839  | 90738968  | PSMC1     |
| ENSG00000100767 | 7.840089987 | 7.955508102 | protein_coding | 14 | 73704205  | 73741348  | PAPLN     |
| ENSG00000100784 | 5.538004898 | 5.059245468 | protein_coding | 14 | 91336799  | 91526980  | RPS6KA5   |
| ENSG00000100796 | 9.547364003 | 8.393311914 | protein_coding | 14 | 91923955  | 91976898  | SMEK1     |
| ENSG00000100802 | 6.400645076 | 6.89311646  | protein_coding | 14 | 23456110  | 23479375  | C14orf93  |
| ENSG00000100804 | 10.29531035 | 10.80276749 | protein_coding | 14 | 23485752  | 23504439  | PSMB5     |
| ENSG00000100811 | 10.82769711 | 10.00496543 | protein_coding | 14 | 100704635 | 100749129 | YY1       |
| ENSG00000100813 | 10.89625086 | 10.99791518 | protein_coding | 14 | 23527773  | 23564823  | ACIN1     |
| ENSG00000100814 | 9.219530792 | 9.500501806 | protein_coding | 14 | 20779527  | 20801471  | CCNB1IP1  |
| ENSG00000100815 | 8.834328271 | 7.95731437  | protein_coding | 14 | 92432335  | 92507241  | TRIP11    |
| ENSG00000100823 | 10.86941024 | 11.34074226 | protein_coding | 14 | 20923350  | 20925927  | APEX1     |
| ENSG00000100836 | 9.865714507 | 10.02059883 | protein_coding | 14 | 23790498  | 23795394  | PABPN1    |
| ENSG00000100852 | 10.2292898  | 10.2059794  | protein_coding | 14 | 32545320  | 32628934  | ARHGAP5   |
| ENSG00000100865 | 8.251597515 | 7.41347308  | protein_coding | 14 | 102808956 | 102829253 | CINP      |
| ENSG00000100867 | 12.09040513 | 12.4476313  | protein_coding | 14 | 24099324  | 24114848  | DHRS2     |
| ENSG00000100883 | 9.401582613 | 9.763100953 | protein_coding | 14 | 35451163  | 35498773  | SRP54     |
| ENSG00000100884 | 0           | 0.390640832 | protein_coding | 14 | 24540046  | 24547309  | CPNE6     |
| ENSG00000100888 | 10.44482396 | 10.30647154 | protein_coding | 14 | 21853353  | 21924285  | CHD8      |
| ENSG00000100889 | 8.936437694 | 9.890987074 | protein_coding | 14 | 24563262  | 24579807  | PCK2      |
| ENSG00000100890 | 3.554067925 | 3.679994897 | protein_coding | 14 | 35591052  | 35743271  |           |
| ENSG00000100897 | 8.766120079 | 8.900038352 | protein_coding | 14 | 24583404  | 24594451  | DCAF11    |
| ENSG00000100902 | 7.348842929 | 7.955508102 | protein_coding | 14 | 35747839  | 35786699  | PSMA6     |
| ENSG00000100906 | 10.4388224  | 10.94632677 | protein_coding | 14 | 35870717  | 35873955  | NFKBIA    |
| ENSG00000100908 | 6.771940731 | 7.318294738 | protein_coding | 14 | 24608174  | 24610797  | FAM158A   |
| ENSG00000100911 | 10.03610671 | 10.82494899 | protein_coding | 14 | 24612574  | 24616779  | PSME2     |
| ENSG00000100916 | 6.664362065 | 7.359856617 | protein_coding | 14 | 36295524  | 36401531  | BRMS1L    |
| ENSG00000100918 | 6.907250452 | 7.289906366 | protein_coding | 14 | 24641062  | 24649463  | REC8      |
| ENSG00000100926 | 6.535310252 | 6.605885938 | protein_coding | 14 | 24658349  | 24682679  | TM9SF1    |
| ENSG00000100934 | 10.59037783 | 10.41659153 | protein_coding | 14 | 39501123  | 39578850  | SEC23A    |
| ENSG00000100938 | 9.316235179 | 9.570029165 | protein_coding | 14 | 24701628  | 24708448  | GMPR2     |
| ENSG00000100941 | 10.3122922  | 10.69809579 | protein_coding | 14 | 39644387  | 39652422  | PNN       |
| ENSG00000100949 | 8.195750939 | 8.605140645 | protein_coding | 14 | 24734744  | 24740945  | RABGGTA   |
| ENSG00000100968 | 6.032862302 | 8.312357201 | protein_coding | 14 | 24834879  | 24848810  | NFATC4    |
| ENSG00000100979 | 11.27658409 | 10.63517057 | protein_coding | 20 | 44527399  | 44540794  | PLTP      |
| ENSG00000100982 | 8.697401955 | 8.352716275 | protein_coding | 20 | 44563267  | 44576662  | PCIF1     |
| ENSG00000100983 | 10.13857657 | 10.38271622 | protein_coding | 20 | 33516236  | 33543620  | GSS       |
| ENSG00000100985 | 7.250461488 | 8.056703738 | protein_coding | 20 | 44637547  | 44645200  | MMP9      |
| ENSG00000100987 | 1.16343121  | 0.950786998 | protein_coding | 20 | 25051521  | 25062996  | VSX1      |
| ENSG00000100991 | 10.91706117 | 11.52314052 | protein_coding | 20 | 33590207  | 33680674  | TRPC4AP   |
| ENSG00000100994 | 11.85105969 | 11.57655918 | protein_coding | 20 | 25228705  | 25278650  | PYGB      |
| ENSG00000100997 | 9.200400892 | 9.59692827  | protein_coding | 20 | 25275379  | 25371619  | ABHD12    |
| ENSG00000101000 | 10.11618743 | 10.73383684 | protein_coding | 20 | 33758727  | 33765165  | PROCR     |
| ENSG00000101003 | 8.728660495 | 9.028445114 | protein_coding | 20 | 25388363  | 25433264  | GINS1     |
| ENSG00000101004 | 8.292108003 | 8.32500368  | protein_coding | 20 | 25433341  | 25566153  | NINL      |
| ENSG00000101017 | 8.500733514 | 9.109464345 | protein_coding | 20 | 44746911  | 44758502  | CD40      |
| ENSG00000101019 | 9.015757872 | 9.44751161  | protein_coding | 20 | 33890369  | 33999944  | UQCC      |
| ENSG00000101040 | 9.945282964 | 9.942505509 | protein_coding | 20 | 45837859  | 45985567  | ZMYND8    |
| ENSG00000101049 | 1.799000381 | 2.039052734 | protein_coding | 20 | 42187608  | 42216877  | SGK2      |
| ENSG00000101052 | 7.491518048 | 7.93548844  | protein_coding | 20 | 42219571  | 42275936  | IFT52     |

|                 |             |             |                |    |          |          |          |
|-----------------|-------------|-------------|----------------|----|----------|----------|----------|
| ENSG00000101057 | 12.16799437 | 11.80662815 | protein_coding | 20 | 42295754 | 42345136 | MYBL2    |
| ENSG00000101076 | 0           | 0.697730409 | protein_coding | 20 | 42984340 | 43060030 | HNF4A    |
| ENSG00000101079 | 9.392739397 | 9.368945519 | protein_coding | 20 | 35280169 | 35374481 | NDRG3    |
| ENSG00000101082 | 0.499066092 | 1.16600992  | protein_coding | 20 | 35240721 | 35274619 | SLA2     |
| ENSG00000101084 | 6.897280837 | 7.462626902 | protein_coding | 20 | 35234137 | 35240960 | C2orf24  |
| ENSG00000101096 | 3.554067925 | 5.41517489  | protein_coding | 20 | 50003494 | 50179339 | NFATC2   |
| ENSG00000101098 | 0           | 0.390640832 | protein_coding | 20 | 43380449 | 43438979 | RIMS4    |
| ENSG00000101104 | 8.681514984 | 8.743459249 | protein_coding | 20 | 43538703 | 43587676 | PABPC1L  |
| ENSG00000101109 | 9.014605485 | 8.975061478 | protein_coding | 20 | 43595115 | 43708600 | STK4     |
| ENSG00000101115 | 5.375152132 | 4.406904905 | protein_coding | 20 | 50400581 | 50419014 | SALL4    |
| ENSG00000101126 | 10.76431847 | 10.60149333 | protein_coding | 20 | 49505585 | 49547958 | ADNP     |
| ENSG00000101132 | 7.498129565 | 8.244450803 | protein_coding | 20 | 52824386 | 52844591 | PFDN4    |
| ENSG00000101138 | 8.753741308 | 8.919626348 | protein_coding | 20 | 54967427 | 54979518 | CSTF1    |
| ENSG00000101144 | 2.57521082  | 4.961837817 | protein_coding | 20 | 55743804 | 55841685 | BMP7     |
| ENSG00000101146 | 9.145657575 | 9.320649169 | protein_coding | 20 | 55926066 | 55954267 | RAE1     |
| ENSG00000101150 | 10.95720266 | 10.81576885 | protein_coding | 20 | 62496596 | 62522898 | TPD52L2  |
| ENSG00000101152 | 10.77558713 | 10.2975873  | protein_coding | 20 | 62526518 | 62567384 | DNAJC5   |
| ENSG00000101158 | 10.4529292  | 10.53319908 | protein_coding | 20 | 57556296 | 57570188 | TH1L     |
| ENSG00000101160 | 10.22879299 | 10.13673322 | protein_coding | 20 | 57570240 | 57582302 | CTSZ     |
| ENSG00000101161 | 10.8798901  | 10.62639901 | protein_coding | 20 | 62612488 | 62664453 | PRPF6    |
| ENSG00000101162 | 1.407729925 | 2.334191469 | protein_coding | 20 | 57594309 | 57601709 | TUBB1    |
| ENSG00000101166 | 9.88413009  | 9.797285822 | protein_coding | 20 | 57608200 | 57617964 | SLMO2    |
| ENSG00000101180 | 0.499066092 | 0.390640832 | protein_coding | 20 | 60790026 | 60795323 | HRH3     |
| ENSG00000101181 | 9.221529789 | 9.189251987 | protein_coding | 20 | 60758085 | 60778624 | GTPBP5   |
| ENSG00000101182 | 11.05740958 | 11.4514184  | protein_coding | 20 | 60711791 | 60718496 | PSMA7    |
| ENSG00000101187 | 10.57482477 | 10.57320837 | protein_coding | 20 | 61273797 | 61317137 | SLCO4A1  |
| ENSG00000101188 | 1.16343121  | 1.518964905 | protein_coding | 20 | 61340189 | 61394123 | NTSR1    |
| ENSG00000101189 | 9.156146748 | 9.150304507 | protein_coding | 20 | 61427805 | 61431945 | C2orf20  |
| ENSG00000101190 | 7.858191159 | 8.053329862 | protein_coding | 20 | 61472467 | 61493115 | TCFL5    |
| ENSG00000101191 | 10.17719799 | 10.1024558  | protein_coding | 20 | 61509090 | 61569304 | DIDO1    |
| ENSG00000101193 | 9.330197577 | 8.89344947  | protein_coding | 20 | 61569471 | 61578019 | C2orf11  |
| ENSG00000101194 | 7.792473675 | 7.304170377 | protein_coding | 20 | 61584052 | 61599949 | SLC17A9  |
| ENSG00000101197 | 1.407729925 | 0.697730409 | protein_coding | 20 | 61867235 | 61871859 | BIRC7    |
| ENSG00000101198 | 1.16343121  | 1.16600992  | protein_coding | 20 | 61872136 | 61904046 | NKAIN4   |
| ENSG00000101199 | 10.71231338 | 11.05132081 | protein_coding | 20 | 61904137 | 61921142 | ARFGAP1  |
| ENSG00000101203 | 3.211941663 | 3.493416095 | protein_coding | 20 | 61924538 | 61966203 | COL20A1  |
| ENSG00000101210 | 11.50936279 | 11.64973533 | protein_coding | 20 | 62119366 | 62130505 | EEF1A2   |
| ENSG00000101213 | 7.671926738 | 7.490337219 | protein_coding | 20 | 62159778 | 62168723 | PTK6     |
| ENSG00000101216 | 8.848626402 | 8.511125832 | protein_coding | 20 | 62218955 | 62258394 | GMEB2    |
| ENSG00000101220 | 10.67341097 | 10.84411243 | protein_coding | 20 | 3734155  | 3749034  | C2orf27  |
| ENSG00000101222 | 2.928422289 | 3.027231696 | protein_coding | 20 | 3758151  | 3762095  | SPEF1    |
| ENSG00000101224 | 11.62261323 | 11.55941784 | protein_coding | 20 | 3767578  | 3786762  | CDC25B   |
| ENSG00000101230 | 5.498982484 | 5.112089758 | protein_coding | 20 | 13202418 | 13281298 | ISM1     |
| ENSG00000101236 | 8.750975986 | 9.132029383 | protein_coding | 20 | 3912068  | 3996229  | RNF24    |
| ENSG00000101246 | 8.798620088 | 9.045526555 | protein_coding | 20 | 62329996 | 62339355 | ARFRP1   |
| ENSG00000101247 | 7.621344476 | 8.032919217 | protein_coding | 20 | 13765596 | 13799067 | C2orf7   |
| ENSG00000101255 | 10.80321277 | 10.65060297 | protein_coding | 20 | 361261   | 378203   | TRIB3    |
| ENSG00000101265 | 4.322773689 | 4.622587519 | protein_coding | 20 | 4760669  | 4804291  | RASSF2   |
| ENSG00000101266 | 11.00150208 | 11.1390794  | protein_coding | 20 | 459116   | 524482   | CSNK2A1  |
| ENSG00000101276 | 6.652556929 | 5.150490275 | protein_coding | 20 | 740724   | 749131   | C2orf54  |
| ENSG00000101278 | 2.10647801  | 2.334191469 | pseudogene     | 20 | 820090   | 820620   |          |
| ENSG00000101280 | 2.847891871 | 3.081239798 | protein_coding | 20 | 853296   | 896977   | ANGPT4   |
| ENSG00000101282 | 0.869158192 | 2.579085888 | protein_coding | 20 | 939095   | 982907   | RSPO4    |
| ENSG00000101290 | 9.921500929 | 9.720129478 | protein_coding | 20 | 5107432  | 5178533  | CDS2     |
| ENSG00000101294 | 11.20741307 | 11.52375014 | protein_coding | 20 | 30102231 | 30157370 | HM13     |
| ENSG00000101298 | 7.916116295 | 8.391976969 | protein_coding | 20 | 1246960  | 1289972  | SNPH     |
| ENSG00000101306 | 5.346128795 | 5.717592784 | protein_coding | 20 | 30407111 | 30422492 | MYLK2    |
| ENSG00000101307 | 4.77879189  | 4.710890357 | protein_coding | 20 | 1544167  | 1600707  | SIRPB1   |
| ENSG00000101310 | 10.26655536 | 10.22634605 | protein_coding | 20 | 18488137 | 18542059 | SEC23B   |
| ENSG00000101311 | 10.11457483 | 9.422885181 | protein_coding | 20 | 6055492  | 6104191  | FERMT1   |
| ENSG00000101323 | 0.499066092 | 0.950786998 | protein_coding | 20 | 7863628  | 7921121  | HAO1     |
| ENSG00000101331 | 0           | 0.697730409 | protein_coding | 20 | 30598245 | 30619984 | C2orf160 |
| ENSG00000101333 | 1.407729925 | 2.721932731 | protein_coding | 20 | 9049410  | 9461889  | PLCB4    |

|                 |             |             |                |    |           |           |           |
|-----------------|-------------|-------------|----------------|----|-----------|-----------|-----------|
| ENSG00000101335 | 8.179389493 | 10.87525763 | protein_coding | 20 | 35169887  | 35178228  | MYL9      |
| ENSG00000101337 | 11.03456701 | 11.07626155 | protein_coding | 20 | 30697309  | 30755061  | TM9SF4    |
| ENSG00000101342 | 3.211941663 | 4.363974406 | protein_coding | 20 | 35504534  | 35522638  | C20orf118 |
| ENSG00000101343 | 9.074447906 | 9.294452589 | protein_coding | 20 | 20015012  | 20036690  | CRNLK1    |
| ENSG00000101346 | 10.20978632 | 10.50352879 | protein_coding | 20 | 30795683  | 30826470  | POFUT1    |
| ENSG00000101347 | 9.169669647 | 10.17487997 | protein_coding | 20 | 35518632  | 35580246  | SAMHD1    |
| ENSG00000101350 | 10.5685563  | 10.36547554 | protein_coding | 20 | 30865467  | 30922814  | KIF3B     |
| ENSG00000101353 | 3.077135474 | 4.048652948 | protein_coding | 20 | 35729629  | 35807991  | C20orf132 |
| ENSG00000101361 | 11.72990091 | 12.33535115 | protein_coding | 20 | 2632791   | 2639039   | NOP56     |
| ENSG00000101363 | 10.02183898 | 10.24495109 | protein_coding | 20 | 35918041  | 35945663  | MANBAL    |
| ENSG00000101365 | 10.56462462 | 11.02766156 | protein_coding | 20 | 2639041   | 2644865   | IDH3B     |
| ENSG00000101367 | 10.91211876 | 11.11197052 | protein_coding | 20 | 31407699  | 31438211  | MAPRE1    |
| ENSG00000101384 | 10.71834247 | 10.05811545 | protein_coding | 20 | 10618332  | 10654608  | JAG1      |
| ENSG00000101391 | 9.4269256   | 9.414362912 | protein_coding | 20 | 31946645  | 31989367  | CDK5RAP1  |
| ENSG00000101400 | 8.312882337 | 8.124184315 | protein_coding | 20 | 31995761  | 32031698  | SNTA1     |
| ENSG00000101405 | 0.499066092 | 0.697730409 | protein_coding | 20 | 3052266   | 3053163   | OXT       |
| ENSG00000101407 | 10.16374581 | 10.25966428 | protein_coding | 20 | 36611409  | 36661870  | TTI1      |
| ENSG00000101412 | 9.707835423 | 9.922303325 | protein_coding | 20 | 32263489  | 32274210  | E2F1      |
| ENSG00000101413 | 9.237422823 | 9.275031414 | protein_coding | 20 | 36661948  | 36720768  | RPRD1B    |
| ENSG00000101417 | 6.830742851 | 6.923001245 | protein_coding | 20 | 32294512  | 32308125  | PXMP4     |
| ENSG00000101421 | 10.9164443  | 10.77896351 | protein_coding | 20 | 32399110  | 32442172  | CHMP4B    |
| ENSG00000101439 | 9.896694904 | 10.74040803 | protein_coding | 20 | 23608534  | 23619110  | CST3      |
| ENSG00000101440 | 3.211941663 | 2.420525079 | protein_coding | 20 | 32782375  | 32857150  | ASIP      |
| ENSG00000101441 | 0.499066092 | 0           | protein_coding | 20 | 23666277  | 23669677  | CST4      |
| ENSG00000101442 | 7.609180529 | 7.764467022 | protein_coding | 20 | 37377085  | 37400834  | ACTR5     |
| ENSG00000101443 | 8.646233023 | 7.655203404 | protein_coding | 20 | 44098346  | 44110172  | WFDC2     |
| ENSG00000101444 | 12.29219201 | 12.22009251 | protein_coding | 20 | 32868074  | 32899608  | AHCY      |
| ENSG00000101445 | 0           | 0.390640832 | protein_coding | 20 | 37434348  | 37551667  | PPP1R16B  |
| ENSG00000101447 | 10.15697238 | 10.49857555 | protein_coding | 20 | 37554955  | 37581703  | FAM83D    |
| ENSG00000101448 | 0.869158192 | 1.353254395 | protein_coding | 20 | 44165625  | 44176391  | SPINLW1   |
| ENSG00000101452 | 8.278730502 | 8.419754632 | protein_coding | 20 | 37590942  | 37668366  | DHX35     |
| ENSG00000101457 | 9.045401313 | 9.394501851 | protein_coding | 20 | 44420576  | 44440066  | DNTTIP1   |
| ENSG00000101460 | 4.981125677 | 3.96493948  | protein_coding | 20 | 33134658  | 33148149  | MAP1LC3A  |
| ENSG00000101464 | 8.558809206 | 8.524589435 | protein_coding | 20 | 33148346  | 33264910  | PIGU      |
| ENSG00000101470 | 0.869158192 | 1.16600992  | protein_coding | 20 | 44451853  | 44462384  | TNNC2     |
| ENSG00000101473 | 7.524276744 | 7.661864922 | protein_coding | 20 | 44470360  | 44486045  | ACOT8     |
| ENSG00000101474 | 10.64241121 | 11.29165499 | protein_coding | 20 | 24943561  | 24973615  | C20orf3   |
| ENSG00000101493 | 8.35173048  | 8.051639961 | protein_coding | 18 | 74069644  | 74207146  | ZNF516    |
| ENSG00000101542 | 0           | 0.390640832 | protein_coding | 18 | 59000988  | 59223006  | CDH20     |
| ENSG00000101544 | 9.081068723 | 8.948972504 | protein_coding | 18 | 77866915  | 77905406  | ADNP2     |
| ENSG00000101546 | 7.440941622 | 7.309836726 | protein_coding | 18 | 77794346  | 77810651  | RBFA      |
| ENSG00000101557 | 9.947700127 | 9.715334193 | protein_coding | 18 | 158483    | 213739    | USP14     |
| ENSG00000101558 | 10.27572327 | 10.07817516 | protein_coding | 18 | 9913999   | 9960018   | VAPA      |
| ENSG00000101574 | 7.062518763 | 7.485338407 | protein_coding | 18 | 2537524   | 2571508   | METTL4    |
| ENSG00000101577 | 8.718787866 | 8.825850709 | protein_coding | 18 | 2916992   | 3013313   | LPIN2     |
| ENSG00000101596 | 9.378476527 | 9.537194665 | protein_coding | 18 | 2655886   | 2805015   | SMCHD1    |
| ENSG00000101605 | 2.847891871 | 3.993387124 | protein_coding | 18 | 3066805   | 3220106   | MYOM1     |
| ENSG00000101608 | 10.58572949 | 10.77436015 | protein_coding | 18 | 3247528   | 3256234   | MYL12A    |
| ENSG00000101624 | 6.393570237 | 6.642271819 | protein_coding | 18 | 12672631  | 12702773  | CEP76     |
| ENSG00000101638 | 1.616589159 | 2.334191469 | protein_coding | 18 | 44259081  | 44337132  | ST8SIA5   |
| ENSG00000101639 | 8.45218826  | 8.614328238 | protein_coding | 18 | 12991361  | 13125051  | CEP192    |
| ENSG00000101654 | 9.478823042 | 10.01106523 | protein_coding | 18 | 13726660  | 13764557  | RNMT      |
| ENSG00000101665 | 7.850461307 | 7.881337775 | protein_coding | 18 | 46446223  | 46477081  | SMAD7     |
| ENSG00000101670 | 10.08303831 | 8.262094789 | protein_coding | 18 | 47088427  | 47119278  | LIPG      |
| ENSG00000101680 | 0.499066092 | 0           | protein_coding | 18 | 6941743   | 7117813   | LAMA1     |
| ENSG00000101695 | 6.820228284 | 6.655683365 | protein_coding | 18 | 29598335  | 29653176  | RNF125    |
| ENSG00000101745 | 8.072698871 | 7.699043321 | protein_coding | 18 | 9136758   | 9285206   | ANKRD12   |
| ENSG00000101746 | 0           | 0.390640832 | protein_coding | 18 | 31431064  | 31803515  | NOL4      |
| ENSG00000101751 | 6.846372398 | 7.18590274  | protein_coding | 18 | 51795889  | 51821101  | POLI      |
| ENSG00000101752 | 9.900443107 | 9.841477998 | protein_coding | 18 | 19321281  | 19450918  | MIB1      |
| ENSG00000101773 | 8.920528869 | 9.021555505 | protein_coding | 18 | 20513290  | 20606449  | RBBP8     |
| ENSG00000101782 | 9.251187042 | 8.996301187 | protein_coding | 18 | 21032787  | 21063104  | RIOK3     |
| ENSG00000101811 | 9.143550557 | 9.267771518 | protein_coding | X  | 100075384 | 100096485 | CSTF2     |

|                 |             |             |                |   |    |           |           |          |
|-----------------|-------------|-------------|----------------|---|----|-----------|-----------|----------|
| ENSG00000101842 | 1.799000381 | 2.144285137 | protein_coding | X |    | 107288200 | 107322414 | VSIG1    |
| ENSG00000101843 | 8.674235392 | 9.176127473 | protein_coding | X |    | 107327437 | 107334848 | PSMD10   |
| ENSG00000101844 | 7.46813618  | 7.586839732 | protein_coding | X |    | 107334898 | 107397901 | ATG4A    |
| ENSG00000101846 | 7.842689815 | 8.740315472 | protein_coding | X |    | 7137497   | 7272851   | STS      |
| ENSG00000101849 | 9.674658935 | 9.352568262 | protein_coding | X |    | 9431335   | 9687780   | TBL1X    |
| ENSG00000101850 | 0.499066092 | 1.925536307 | protein_coding | X |    | 9693386   | 9754337   | GPR143   |
| ENSG00000101856 | 9.503677432 | 9.812333804 | protein_coding | X |    | 118370216 | 118378429 | PGRMC1   |
| ENSG00000101868 | 8.759256101 | 9.091483708 | protein_coding | X |    | 24712036  | 25015103  | POLA1    |
| ENSG00000101871 | 8.814599602 | 8.728729322 | protein_coding | X |    | 10413350  | 10851773  | MID1     |
| ENSG00000101882 | 8.241782151 | 8.667154767 | protein_coding | X |    | 119059014 | 119077735 | NKAP     |
| ENSG00000101888 | 7.33043718  | 7.55379311  | protein_coding | X |    | 108779010 | 108787919 | NXT2     |
| ENSG00000101890 | 0.499066092 | 0           | protein_coding | X |    | 108616135 | 108725301 | GUCY2F   |
| ENSG00000101892 | 0.869158192 | 0           | protein_coding | X |    | 119495967 | 119516226 | ATP1B4   |
| ENSG00000101898 | 5.072559152 | 5.072639111 | pseudogene     |   | 20 | 30135307  | 30135852  |          |
| ENSG00000101901 | 8.261346552 | 8.635917101 | protein_coding | X |    | 110909043 | 111003877 | ALG13    |
| ENSG00000101911 | 10.44268341 | 10.24864348 | protein_coding | X |    | 12809474  | 12842341  | PRPS2    |
| ENSG00000101928 | 7.743231983 | 8.524589435 | protein_coding | X |    | 134021656 | 134049297 | MOSPD1   |
| ENSG00000101935 | 8.846037259 | 8.576046394 | protein_coding | X |    | 109437414 | 109683461 | AMMECR1  |
| ENSG00000101940 | 9.974025012 | 10.66310783 | protein_coding | X |    | 48448430  | 48463581  | WDR13    |
| ENSG00000101945 | 8.33889698  | 8.519708104 | protein_coding | X |    | 48553945  | 48567403  | SUV39H1  |
| ENSG00000101958 | 0.499066092 | 0           | protein_coding | X |    | 14547420  | 14749934  | GLRA2    |
| ENSG00000101966 | 9.485492858 | 9.503595441 | protein_coding | X |    | 122993574 | 123047829 | XIAP     |
| ENSG00000101972 | 10.67960449 | 10.68643641 | protein_coding | X |    | 123094062 | 123556514 | STAG2    |
| ENSG00000101974 | 9.203438318 | 9.307964293 | protein_coding | X |    | 138808505 | 139027435 | ATP11C   |
| ENSG00000101977 | 0           | 0.697730409 | protein_coding | X |    | 138663929 | 138790386 | MCF2     |
| ENSG00000101986 | 8.831713317 | 8.973277306 | protein_coding | X |    | 152990323 | 153010216 | ABCD1    |
| ENSG00000101997 | 8.790563466 | 9.185404214 | protein_coding | X |    | 49091927  | 49106987  | CCDC22   |
| ENSG00000102001 | 1.16343121  | 1.353254395 | protein_coding | X |    | 49061523  | 49089833  | CACNA1F  |
| ENSG00000102003 | 3.830412367 | 5.112089758 | protein_coding | X |    | 49044269  | 49056718  | SYP      |
| ENSG00000102007 | 10.57247728 | 10.99087786 | protein_coding | X |    | 49028273  | 49031588  | PLP2     |
| ENSG00000102021 | 0.499066092 | 0           | protein_coding | X |    | 114524293 | 114542121 | LUZP4    |
| ENSG00000102024 | 11.41839834 | 11.93156176 | protein_coding | X |    | 114795501 | 114885181 | PLS3     |
| ENSG00000102030 | 8.616157604 | 9.245030827 | protein_coding | X |    | 153194695 | 153200676 | NAA10    |
| ENSG00000102032 | 1.616589159 | 4.7279204   | protein_coding | X |    | 153200716 | 153210232 | RENBP    |
| ENSG00000102034 | 9.940436455 | 9.470460424 | protein_coding | X |    | 129198849 | 129244691 | ELF4     |
| ENSG00000102038 | 8.53006357  | 8.66273344  | protein_coding | X |    | 128580480 | 128657477 | SMARCA1  |
| ENSG00000102043 | 2.847891871 | 2.579085888 | protein_coding | X |    | 63444187  | 63615333  | MTMR8    |
| ENSG00000102048 | 4.543379137 | 4.872768657 | protein_coding | X |    | 15252900  | 15288589  | ASB9     |
| ENSG00000102053 | 4.543379137 | 4.101879561 | protein_coding | X |    | 64708615  | 64727767  | ZC3H12B  |
| ENSG00000102054 | 10.50514714 | 10.86663337 | protein_coding | X |    | 16857406  | 16888537  | RBBP7    |
| ENSG00000102057 | 5.223818625 | 4.42790041  | protein_coding | X |    | 48818639  | 48827976  | KCND1    |
| ENSG00000102069 | 0.869158192 | 1.16600992  | protein_coding | X |    | 142967173 | 142968355 | UBE2NL   |
| ENSG00000102078 | 6.171673665 | 6.803579823 | protein_coding | X |    | 129473874 | 129507335 | SLC25A14 |
| ENSG00000102081 | 9.652603664 | 10.03606464 | protein_coding | X |    | 146993469 | 147032645 | FMR1     |
| ENSG00000102096 | 8.547698305 | 8.229580833 | protein_coding | X |    | 48770459  | 48776301  | PIM2     |
| ENSG00000102098 | 6.350376764 | 6.505763096 | protein_coding | X |    | 18257434  | 18372847  | SCML2    |
| ENSG00000102100 | 8.970118399 | 9.18617459  | protein_coding | X |    | 48760459  | 48769235  | SLC35A2  |
| ENSG00000102103 | 9.893563944 | 10.43388431 | protein_coding | X |    | 48755195  | 48760420  | PQBP1    |
| ENSG00000102104 | 0           | 0.697730409 | protein_coding | X |    | 18658030  | 18690229  | RS1      |
| ENSG00000102109 | 3.950976309 | 7.126137778 | protein_coding | X |    | 48689504  | 48694035  | PCSK1N   |
| ENSG00000102119 | 9.99813007  | 9.870524428 | protein_coding | X |    | 153607557 | 153609883 | EMD      |
| ENSG00000102125 | 8.520352988 | 8.598211347 | protein_coding | X |    | 153639854 | 153650065 | TAZ      |
| ENSG00000102128 | 0.869158192 | 0           | protein_coding | X |    | 102192200 | 102193228 | RAB40AL  |
| ENSG00000102144 | 13.22867268 | 13.64876991 | protein_coding | X |    | 77320685  | 77384793  | PGK1     |
| ENSG00000102145 | 0.499066092 | 0.950786998 | protein_coding | X |    | 48644962  | 48652718  | GATA1    |
| ENSG00000102158 | 10.18592632 | 10.34388978 | protein_coding | X |    | 77081861  | 77151090  | MAGT1    |
| ENSG00000102172 | 10.93605468 | 11.1380844  | protein_coding | X |    | 21958691  | 22025798  | SMS      |
| ENSG00000102174 | 3.78787645  | 3.679994897 | protein_coding | X |    | 22050559  | 22269427  | PHEX     |
| ENSG00000102178 | 9.770619129 | 9.749613921 | protein_coding | X |    | 153712056 | 153715009 | UBL4A    |
| ENSG00000102181 | 9.585892264 | 9.833632489 | protein_coding | X |    | 149934810 | 150067289 | CD99L2   |
| ENSG00000102189 | 8.829093615 | 9.189251987 | protein_coding |   | 12 | 93164413  | 93323107  | EEA1     |
| ENSG00000102195 | 0.499066092 | 0           | protein_coding | X |    | 150345056 | 150349937 | GPR50    |
| ENSG00000102218 | 7.46813618  | 7.48283249  | protein_coding | X |    | 46696375  | 46741793  | RP2      |

|                 |             |             |                |    |           |           |           |
|-----------------|-------------|-------------|----------------|----|-----------|-----------|-----------|
| ENSG00000102221 | 8.255505039 | 8.567793748 | protein_coding | X  | 46771711  | 46920641  | PHF16     |
| ENSG00000102225 | 11.22669965 | 11.22799002 | protein_coding | X  | 47077259  | 47089396  | CDK16     |
| ENSG00000102226 | 10.16166506 | 10.15021936 | protein_coding | X  | 47092089  | 47107727  | USP11     |
| ENSG00000102230 | 0           | 0.390640832 | protein_coding | X  | 24576204  | 24690794  | PCYT1B    |
| ENSG00000102241 | 9.974025012 | 10.25636687 | protein_coding | X  | 135579238 | 135594505 | HTATSF1   |
| ENSG00000102265 | 10.25537886 | 11.04028549 | protein_coding | X  | 47441712  | 47446188  | TIMP1     |
| ENSG00000102271 | 7.186405829 | 7.164171052 | protein_coding | X  | 86772752  | 86925050  | KLHL4     |
| ENSG00000102302 | 9.168633912 | 9.304420832 | protein_coding | X  | 54471887  | 54522599  | FGD1      |
| ENSG00000102309 | 6.830742851 | 7.332282157 | protein_coding | X  | 71401203  | 71522776  | PIN4      |
| ENSG00000102312 | 8.237837231 | 8.229580833 | protein_coding | X  | 48367350  | 48379202  | PORCN     |
| ENSG00000102316 | 10.08742937 | 10.66116973 | protein_coding | X  | 54834032  | 54842445  | MAGED2    |
| ENSG00000102317 | 10.79920289 | 10.54135041 | protein_coding | X  | 48432837  | 48437454  | RBM3      |
| ENSG00000102349 | 3.004694206 | 2.242360793 | protein_coding | X  | 56258854  | 56314322  | KLF8      |
| ENSG00000102359 | 7.093410923 | 8.226588358 | protein_coding | X  | 99899215  | 99926296  | SRPX2     |
| ENSG00000102362 | 8.523597116 | 8.590084877 | protein_coding | X  | 99929488  | 99987110  | SYTL4     |
| ENSG00000102384 | 7.698004462 | 8.024328814 | protein_coding | X  | 100353178 | 100418670 | CENPI     |
| ENSG00000102385 | 3.211941663 | 3.96493948  | protein_coding | X  | 100474758 | 100519486 | DRP2      |
| ENSG00000102387 | 1.407729925 | 2.851901313 | protein_coding | X  | 100523241 | 100548059 | TAF7L     |
| ENSG00000102390 | 8.133414584 | 8.528239625 | protein_coding | X  | 75392771  | 75398039  | CXorf26   |
| ENSG00000102393 | 8.767488965 | 8.98660512  | protein_coding | X  | 100652791 | 100662913 | GLA       |
| ENSG00000102401 | 9.03179537  | 9.545623701 | protein_coding | X  | 100877787 | 100882833 | ARMCX3    |
| ENSG00000102409 | 0           | 0.950786998 | protein_coding | X  | 102470020 | 102472174 | BEX4      |
| ENSG00000102445 | 0.499066092 | 0           | protein_coding | 13 | 46916139  | 47012325  | KIAA0226L |
| ENSG00000102452 | 4.642199401 | 5.187895122 | protein_coding | 13 | 101706130 | 102068843 | NALCN     |
| ENSG00000102471 | 7.908691438 | 7.641787375 | protein_coding | 13 | 80055287  | 80130210  | NDFIP2    |
| ENSG00000102524 | 0.869158192 | 0.697730409 | protein_coding | 13 | 108903588 | 108959385 | TNFSF13B  |
| ENSG00000102531 | 8.710271506 | 8.418443943 | protein_coding | 13 | 49550048  | 49783888  | FNDC3A    |
| ENSG00000102539 | 0           | 0.390640832 | protein_coding | 13 | 49794474  | 49796513  | MLNR      |
| ENSG00000102543 | 5.538004898 | 4.917990497 | protein_coding | 13 | 49822047  | 49867618  | CDADC1    |
| ENSG00000102547 | 5.239686603 | 4.857374129 | protein_coding | 13 | 49882786  | 50018262  | CAB39L    |
| ENSG00000102554 | 7.923503136 | 6.167968749 | protein_coding | 13 | 73629114  | 73651676  | KLF5      |
| ENSG00000102572 | 3.698846687 | 3.32456471  | protein_coding | 13 | 99102455  | 99230194  | STK24     |
| ENSG00000102575 | 5.223818625 | 3.64455972  | protein_coding | 19 | 11685477  | 11689801  | ACP5      |
| ENSG00000102580 | 7.19863491  | 7.083771121 | protein_coding | 13 | 96329411  | 96443301  | DNAJC3    |
| ENSG00000102595 | 7.54038131  | 7.716212954 | protein_coding | 13 | 96453834  | 96705736  | UGGT2     |
| ENSG00000102606 | 8.836938493 | 8.612036819 | protein_coding | 13 | 111766906 | 111958084 | ARHGEF7   |
| ENSG00000102683 | 0.499066092 | 0.390640832 | protein_coding | 13 | 23755091  | 23899304  | SGCG      |
| ENSG00000102699 | 9.833400793 | 9.814826612 | protein_coding | 13 | 24995064  | 25086948  | PARP4     |
| ENSG00000102710 | 8.80263159  | 8.385283657 | protein_coding | 13 | 37583449  | 37633850  | FAM48A    |
| ENSG00000102738 | 6.93675248  | 6.708116507 | protein_coding | 13 | 41303432  | 41345309  | MRPS31    |
| ENSG00000102743 | 7.572060955 | 6.82352253  | protein_coding | 13 | 41363548  | 41386596  | SLC25A15  |
| ENSG00000102753 | 9.143550557 | 8.516036237 | protein_coding | 13 | 50273447  | 50367057  | KPNA3     |
| ENSG00000102760 | 2.671945279 | 0           | protein_coding | 13 | 42031695  | 42045018  | C13orf15  |
| ENSG00000102763 | 7.712290964 | 7.029859489 | protein_coding | 13 | 42140961  | 42535256  | KIAA0564  |
| ENSG00000102780 | 5.649112675 | 5.09905904  | protein_coding | 13 | 42614176  | 42830714  | DGKH      |
| ENSG00000102781 | 7.427149666 | 7.077141316 | protein_coding | 13 | 30776767  | 30881621  | KATNAL1   |
| ENSG00000102786 | 7.603059879 | 6.963107483 | protein_coding | 13 | 51928213  | 52028400  | INTS6     |
| ENSG00000102794 | 0.869158192 | 0.697730409 | protein_coding | 13 | 77522632  | 77532777  | IRG1      |
| ENSG00000102796 | 3.502389126 | 3.87606762  | protein_coding | 13 | 52342129  | 52378293  | DHRS12    |
| ENSG00000102802 | 0.499066092 | 0           | protein_coding | 13 | 31480328  | 31499709  | C13orf33  |
| ENSG00000102804 | 10.2924605  | 9.033590816 | protein_coding | 13 | 45007655  | 45151283  | TSC22D1   |
| ENSG00000102805 | 6.917151646 | 7.332282157 | protein_coding | 13 | 77564795  | 77576652  | CLN5      |
| ENSG00000102854 | 3.004694206 | 3.411459265 | protein_coding | 16 | 693262    | 818865    | MSLN      |
| ENSG00000102858 | 10.07973621 | 10.11059465 | protein_coding | 16 | 4666494   | 4740975   | MGRN1     |
| ENSG00000102870 | 7.90122817  | 7.646273261 | protein_coding | 16 | 30789778  | 30798523  | ZNF629    |
| ENSG00000102871 | 8.15239992  | 8.080102494 | protein_coding | 16 | 67188083  | 67194201  | TRADD     |
| ENSG00000102878 | 7.097770581 | 7.524852175 | protein_coding | 16 | 67197288  | 67203848  | HSF4      |
| ENSG00000102879 | 5.806547963 | 5.072639111 | protein_coding | 16 | 30194148  | 30200397  | CORO1A    |
| ENSG00000102882 | 9.316235179 | 8.810943783 | protein_coding | 16 | 30125426  | 30134827  | MAPK3     |
| ENSG00000102886 | 4.800350936 | 3.96493948  | protein_coding | 16 | 30116131  | 30125177  | GDPD3     |
| ENSG00000102890 | 8.205883411 | 5.004391715 | protein_coding | 16 | 67233014  | 67237932  | ELMO3     |
| ENSG00000102893 | 9.520824196 | 9.418302523 | protein_coding | 16 | 47495034  | 47735434  | PHKB      |
| ENSG00000102897 | 8.663981856 | 8.621180739 | protein_coding | 16 | 20911190  | 20936328  | LYRM1     |



|                 |             |             |                |    |          |          |          |
|-----------------|-------------|-------------|----------------|----|----------|----------|----------|
| ENSG00000102898 | 10.68214706 | 10.75164095 | protein_coding | 16 | 67880635 | 67906470 | NUTF2    |
| ENSG00000102900 | 10.40887296 | 10.77972931 | protein_coding | 16 | 56764017 | 56880792 | NUP93    |
| ENSG00000102901 | 8.872994239 | 9.654843329 | protein_coding | 16 | 67862060 | 67881714 | CENPT    |
| ENSG00000102904 | 4.131913373 | 5.32851069  | protein_coding | 16 | 67840668 | 67861971 | TSNAXIP1 |
| ENSG00000102908 | 9.674658935 | 9.788181112 | protein_coding | 16 | 69598997 | 69738569 | NFAT5    |
| ENSG00000102910 | 9.756212088 | 9.871003614 | protein_coding | 16 | 48278207 | 48395747 | LONP2    |
| ENSG00000102921 | 9.228504544 | 9.712663243 | protein_coding | 16 | 48572637 | 48654059 | N4BP1    |
| ENSG00000102931 | 8.775675113 | 9.115947593 | protein_coding | 16 | 57279010 | 57287516 | ARL2BP   |
| ENSG00000102934 | 5.575999561 | 4.048652948 | protein_coding | 16 | 57290004 | 57318599 | PLLP     |
| ENSG00000102935 | 5.158541613 | 4.250702764 | protein_coding | 16 | 49521435 | 49891830 | ZNF423   |
| ENSG00000102962 | 1.616589159 | 0.950786998 | protein_coding | 16 | 57392684 | 57400102 | CCL22    |
| ENSG00000102967 | 7.524276744 | 7.32390599  | protein_coding | 16 | 72042643 | 72058954 | DHODH    |
| ENSG00000102970 | 1.16343121  | 0.390640832 | protein_coding | 16 | 57438679 | 57449974 | CCL17    |
| ENSG00000102974 | 9.465390183 | 9.478029618 | protein_coding | 16 | 67596310 | 67673086 | CTCF     |
| ENSG00000102977 | 9.419108071 | 9.396500307 | protein_coding | 16 | 67691433 | 67694713 | ACD      |
| ENSG00000102978 | 9.358631958 | 9.661506506 | protein_coding | 16 | 57496299 | 57505922 | POLR2C   |
| ENSG00000102981 | 3.077135474 | 4.566889334 | protein_coding | 16 | 67694851 | 67696680 | PARD6A   |
| ENSG00000102984 | 4.942865586 | 5.175534283 | protein_coding | 16 | 71893583 | 71929239 | ZNF821   |
| ENSG00000102996 | 9.345859976 | 9.045526555 | protein_coding | 16 | 58059470 | 58080805 | MMP15    |
| ENSG00000103005 | 10.73383117 | 10.43031225 | protein_coding | 16 | 58033450 | 58055522 | C16orf57 |
| ENSG00000103018 | 9.96986896  | 9.561148156 | protein_coding | 16 | 69458428 | 69500169 | CYB5B    |
| ENSG00000103021 | 7.842689815 | 7.436965343 | protein_coding | 16 | 58265061 | 58317740 | CCDC113  |
| ENSG00000103023 | 0           | 0.390640832 | protein_coding | 16 | 58313901 | 58328951 | PRSS54   |
| ENSG00000103024 | 8.497437504 | 8.581912372 | protein_coding | 16 | 1820287  | 1821731  | NME3     |
| ENSG00000103034 | 6.364918751 | 6.223059835 | protein_coding | 16 | 58496750 | 58547532 | NDRG4    |
| ENSG00000103035 | 10.1252916  | 10.16982567 | protein_coding | 16 | 74330673 | 74340186 | PSMD7    |
| ENSG00000103037 | 7.803191723 | 8.613182984 | protein_coding | 16 | 58549383 | 58554431 | SETD6    |
| ENSG00000103042 | 8.599344916 | 9.011159004 | protein_coding | 16 | 58699013 | 58719008 | SLC38A7  |
| ENSG00000103043 | 10.09399102 | 10.32722395 | protein_coding | 16 | 70721342 | 70835064 | VAC14    |
| ENSG00000103044 | 8.362640485 | 5.486957566 | protein_coding | 16 | 69139467 | 69152622 | HAS3     |
| ENSG00000103047 | 8.731468881 | 8.492561507 | protein_coding | 16 | 68877507 | 69119083 | TMCO7    |
| ENSG00000103051 | 9.441577455 | 9.709451562 | protein_coding | 16 | 70514471 | 70557468 | COG4     |
| ENSG00000103056 | 4.437288965 | 5.085909553 | protein_coding | 16 | 68392230 | 68482591 | SMPD3    |
| ENSG00000103061 | 6.0776925   | 6.002883551 | protein_coding | 16 | 68318406 | 68344849 | SLC7A6OS |
| ENSG00000103064 | 8.866621448 | 8.807943825 | protein_coding | 16 | 68298433 | 68335722 | SLC7A6   |
| ENSG00000103066 | 7.726437377 | 7.799123587 | protein_coding | 16 | 68269105 | 68294961 | PLA2G15  |
| ENSG00000103067 | 8.760631512 | 7.774746834 | protein_coding | 16 | 68259871 | 68272005 | ESRP2    |
| ENSG00000103089 | 3.077135474 | 2.851901313 | protein_coding | 16 | 74746853 | 74808729 | FA2H     |
| ENSG00000103091 | 9.510233586 | 9.329741599 | protein_coding | 16 | 74907468 | 75034071 | WDR59    |
| ENSG00000103111 | 9.3522601   | 9.405128432 | protein_coding | 16 | 77224732 | 77236302 | MON1B    |
| ENSG00000103121 | 8.054871625 | 8.24888207  | protein_coding | 16 | 81009698 | 81053875 | C16orf61 |
| ENSG00000103126 | 9.467076146 | 9.53960799  | protein_coding | 16 | 337440   | 402673   | AXIN1    |
| ENSG00000103145 | 8.555643385 | 9.324153043 | protein_coding | 16 | 3072626  | 3074287  | HCFC1R1  |
| ENSG00000103148 | 10.3836544  | 10.07276981 | protein_coding | 16 | 134273   | 188859   | NPRL3    |
| ENSG00000103150 | 6.535310252 | 6.577981353 | protein_coding | 16 | 83932731 | 83949787 | MLYCD    |
| ENSG00000103152 | 7.296703257 | 8.058387721 | protein_coding | 16 | 127006   | 135852   | MPG      |
| ENSG00000103154 | 4.821592551 | 4.075511708 | protein_coding | 16 | 84002237 | 84036381 | NECAB2   |
| ENSG00000103160 | 8.549290825 | 8.501254594 | protein_coding | 16 | 84155886 | 84178797 | HSDL1    |
| ENSG00000103168 | 9.639954365 | 9.80533094  | protein_coding | 16 | 84211458 | 84220669 | TAF1C    |
| ENSG00000103174 | 8.500733514 | 8.847439299 | protein_coding | 16 | 5074845  | 5084142  | NAGPA    |
| ENSG00000103175 | 0.499066092 | 0           | protein_coding | 16 | 84328252 | 84363450 | WFDC1    |
| ENSG00000103184 | 0.499066092 | 0.950786998 | protein_coding | 16 | 5008318  | 5069159  | SEC14L5  |
| ENSG00000103187 | 13.47430901 | 12.8074285  | protein_coding | 16 | 84599200 | 84651683 | COTL1    |
| ENSG00000103194 | 10.45165245 | 10.32407756 | protein_coding | 16 | 84733584 | 84813528 | USP10    |
| ENSG00000103196 | 6.548110424 | 5.564846512 | protein_coding | 16 | 84853590 | 84954374 | CRISPLD2 |
| ENSG00000103197 | 10.32629262 | 10.49826541 | protein_coding | 16 | 2097466  | 2138716  | TSC2     |
| ENSG00000103199 | 7.434062125 | 7.532142019 | protein_coding | 16 | 4798240  | 4817219  | ZNF500   |
| ENSG00000103202 | 10.32164089 | 10.26951153 | protein_coding | 16 | 446725   | 460367   | NME4     |
| ENSG00000103222 | 10.24706195 | 10.01973474 | protein_coding | 16 | 16043434 | 16236931 | ABCC1    |
| ENSG00000103226 | 5.588445295 | 6.037446454 | protein_coding | 16 | 16326452 | 16388668 | NOMO3    |
| ENSG00000103227 | 7.935731106 | 7.782918269 | protein_coding | 16 | 903634   | 1031318  | LMF1     |
| ENSG00000103241 | 5.018397273 | 3.608232228 | protein_coding | 16 | 86544133 | 86548076 | FOXF1    |
| ENSG00000103245 | 8.316627558 | 8.464894292 | protein_coding | 16 | 779753   | 791329   | NARFL    |

|                 |             |             |                |    |          |          |          |
|-----------------|-------------|-------------|----------------|----|----------|----------|----------|
| ENSG00000103248 | 7.990682129 | 8.159132889 | protein_coding | 16 | 86563782 | 86588841 | MTHFSD   |
| ENSG00000103249 | 10.41150208 | 10.58201568 | protein_coding | 16 | 1494935  | 1525581  | CLCN7    |
| ENSG00000103253 | 7.430610036 | 7.260948155 | protein_coding | 16 | 776936   | 779733   | HAGHL    |
| ENSG00000103254 | 7.311793575 | 7.705505903 | protein_coding | 16 | 770581   | 772601   | FAM173A  |
| ENSG00000103257 | 13.59216843 | 13.15261038 | protein_coding | 16 | 87863629 | 87903094 | SLC7A5   |
| ENSG00000103260 | 9.74513791  | 9.759482214 | protein_coding | 16 | 765115   | 769499   | METRN    |
| ENSG00000103264 | 8.805299741 | 8.949880022 | protein_coding | 16 | 87362942 | 87425748 | FBXO31   |
| ENSG00000103266 | 9.154055005 | 9.128827334 | protein_coding | 16 | 730224   | 732799   | STUB1    |
| ENSG00000103269 | 4.491309013 | 4.15321211  | protein_coding | 16 | 725666   | 728268   | RHBDL1   |
| ENSG00000103274 | 7.071412799 | 7.563312496 | protein_coding | 16 | 10837678 | 10863208 | NUBP1    |
| ENSG00000103275 | 9.960324212 | 10.13593598 | protein_coding | 16 | 1355548  | 1377019  | UBE2I    |
| ENSG00000103310 | 0.869158192 | 0           | protein_coding | 16 | 21208771 | 21222868 | ZP2      |
| ENSG00000103313 | 7.08025234  | 5.271576845 | protein_coding | 16 | 3292027  | 3306627  | MEFV     |
| ENSG00000103316 | 1.960915222 | 2.851901313 | protein_coding | 16 | 21269839 | 21314372 | CRYM     |
| ENSG00000103319 | 9.462857538 | 9.064085459 | protein_coding | 16 | 22217603 | 22298554 | EEF2K    |
| ENSG00000103326 | 10.62023235 | 10.52500144 | protein_coding | 16 | 577717   | 604636   | SOLH     |
| ENSG00000103335 | 11.89383682 | 12.0755117  | protein_coding | 16 | 88781751 | 88851619 | PIEZO1   |
| ENSG00000103342 | 11.85299524 | 11.74522334 | protein_coding | 16 | 11961985 | 12009939 | GSPT1    |
| ENSG00000103343 | 7.190493718 | 7.301328834 | protein_coding | 16 | 3451190  | 3459370  | ZNF174   |
| ENSG00000103351 | 7.30049066  | 7.53698153  | protein_coding | 16 | 3550963  | 3586581  | CLUAP1   |
| ENSG00000103353 | 9.687732048 | 9.722786654 | protein_coding | 16 | 23568392 | 23585710 | UBFD1    |
| ENSG00000103355 | 0.499066092 | 0.390640832 | protein_coding | 16 | 2833954  | 2836708  | PRSS33   |
| ENSG00000103356 | 9.156146748 | 9.001562612 | protein_coding | 16 | 23533335 | 23569052 | EARS2    |
| ENSG00000103363 | 9.924571906 | 10.5962863  | protein_coding | 16 | 2821415  | 2827278  | TCEB2    |
| ENSG00000103365 | 9.968084123 | 10.05221177 | protein_coding | 16 | 23474863 | 23533316 | GGA2     |
| ENSG00000103375 | 1.16343121  | 0.950786998 | protein_coding | 16 | 25227052 | 25240261 | AQP8     |
| ENSG00000103381 | 9.348606364 | 9.733893656 | protein_coding | 16 | 12756919 | 12897874 | CPPED1   |
| ENSG00000103404 | 9.492959727 | 9.644229954 | protein_coding | 16 | 23072727 | 23160591 | USP31    |
| ENSG00000103415 | 9.390075828 | 9.563521776 | protein_coding | 16 | 4524719  | 4560348  | HMOX2    |
| ENSG00000103423 | 10.03837651 | 10.22971271 | protein_coding | 16 | 4475806  | 4506776  | DNAJA3   |
| ENSG00000103426 | 9.132969064 | 8.14493792  | protein_coding | 16 | 4404543  | 4466639  | CORO7    |
| ENSG00000103429 | 9.74513791  | 9.844409099 | protein_coding | 16 | 14726672 | 14763093 | BFAR     |
| ENSG00000103472 | 0.869158192 | 0.390640832 | pseudogene     | 16 | 29086163 | 29128039 | RRN3P2   |
| ENSG00000103479 | 8.622223055 | 8.945336714 | protein_coding | 16 | 53467889 | 53525561 | RBL2     |
| ENSG00000103485 | 9.048782844 | 8.76630664  | protein_coding | 16 | 29674600 | 29710020 | QPRT     |
| ENSG00000103490 | 4.543379137 | 1.667587519 | protein_coding | 16 | 31212806 | 31214771 | PYCARD   |
| ENSG00000103494 | 6.782811835 | 7.485338407 | protein_coding | 16 | 53631595 | 53737850 | RPGRIP1L |
| ENSG00000103495 | 9.187164314 | 9.520187397 | protein_coding | 16 | 29817427 | 29823649 | MAZ      |
| ENSG00000103496 | 9.272554655 | 9.552212138 | protein_coding | 16 | 31044210 | 31054296 | STX4     |
| ENSG00000103502 | 9.87399885  | 9.91813598  | protein_coding | 16 | 29869678 | 29875057 | CDIPT    |
| ENSG00000103507 | 10.1097262  | 10.4040641  | protein_coding | 16 | 31117428 | 31124110 | BCKDK    |
| ENSG00000103510 | 8.572970055 | 8.663840043 | protein_coding | 16 | 31127075 | 31142714 | KAT8     |
| ENSG00000103512 | 8.53328596  | 9.069105817 | protein_coding | 16 | 14927538 | 14990017 | NOMO1    |
| ENSG00000103522 | 3.871730003 | 2.144285137 | protein_coding | 16 | 27413483 | 27462115 | IL21R    |
| ENSG00000103528 | 6.188122351 | 2.579085888 | protein_coding | 16 | 19179293 | 19279652 | SYT17    |
| ENSG00000103534 | 8.557227164 | 6.530239731 | protein_coding | 16 | 19421818 | 19510435 | TMC5     |
| ENSG00000103540 | 8.54291017  | 8.409235632 | protein_coding | 16 | 19535133 | 19564730 | CCP110   |
| ENSG00000103544 | 8.607011344 | 8.925174415 | protein_coding | 16 | 19566562 | 19718116 | C16orf62 |
| ENSG00000103546 | 0           | 0.390640832 | protein_coding | 16 | 55689516 | 55740104 | SLC6A2   |
| ENSG00000103549 | 10.04064274 | 9.665931589 | protein_coding | 16 | 30773066 | 30787628 | RNF40    |
| ENSG00000103550 | 7.893726093 | 8.060069742 | protein_coding | 16 | 19716722 | 19729557 | C16orf88 |
| ENSG00000103591 | 9.412998348 | 9.382452634 | protein_coding | 15 | 67493371 | 67547533 | AAGAB    |
| ENSG00000103599 | 4.292665995 | 4.226940739 | protein_coding | 15 | 67547138 | 67794598 | IQCH     |
| ENSG00000103642 | 8.009315251 | 8.774525884 | protein_coding | 15 | 63413999 | 63434260 | LACTB    |
| ENSG00000103647 | 3.744048221 | 2.721932731 | protein_coding | 15 | 68871308 | 69020145 | CORO2B   |
| ENSG00000103653 | 9.553725034 | 9.452002561 | protein_coding | 15 | 75074398 | 75095539 | CSK      |
| ENSG00000103657 | 9.161362874 | 9.155820862 | protein_coding | 15 | 63900817 | 64126147 | HERC1    |
| ENSG00000103671 | 7.556308086 | 7.752033772 | protein_coding | 15 | 64679947 | 64747502 | TRIP4    |
| ENSG00000103707 | 7.003331296 | 6.771086752 | protein_coding | 15 | 65294845 | 65321977 | MTFMT    |
| ENSG00000103723 | 1.616589159 | 1.802319292 | protein_coding | 15 | 83328033 | 83378666 | AP3B2    |
| ENSG00000103740 | 2.35979773  | 2.788380093 | protein_coding | 15 | 78459810 | 78538030 | ACSBG1   |
| ENSG00000103742 | 2.57521082  | 2.501982735 | protein_coding | 15 | 65673802 | 65715410 | IGDCC4   |
| ENSG00000103769 | 9.689899429 | 9.830679389 | protein_coding | 15 | 66018392 | 66184329 | RAB11A   |

|                 |             |             |                |    |           |           |          |
|-----------------|-------------|-------------|----------------|----|-----------|-----------|----------|
| ENSG00000103811 | 7.993024472 | 6.520498852 | protein_coding | 15 | 79213400  | 79241916  | CTSH     |
| ENSG00000103832 | 0.499066092 | 0.697730409 | pseudogene     | 15 | 31083776  | 31094062  |          |
| ENSG00000103852 | 7.402691859 | 7.551403417 | protein_coding | 15 | 99676528  | 99791428  | TTC23    |
| ENSG00000103855 | 10.47236588 | 10.22933902 | protein_coding | 15 | 73976307  | 74006859  | CD276    |
| ENSG00000103876 | 8.447071828 | 7.711939664 | protein_coding | 15 | 80444832  | 80479288  | FAH      |
| ENSG00000103888 | 7.481543613 | 8.283850589 | protein_coding | 15 | 81071684  | 81244117  | KIAA1199 |
| ENSG00000103932 | 9.630205981 | 8.988372895 | protein_coding | 15 | 41809374  | 41836467  | RPAP1    |
| ENSG00000103942 | 8.721615518 | 8.649387576 | protein_coding | 15 | 83509838  | 83654661  | HOMER2   |
| ENSG00000103966 | 10.24165476 | 9.652615414 | protein_coding | 15 | 42190950  | 42264776  | EHD4     |
| ENSG00000103978 | 8.619193517 | 8.439273392 | protein_coding | 15 | 42502730  | 42565861  | TMEM87A  |
| ENSG00000103994 | 9.728365606 | 9.41961334  | protein_coding | 15 | 42705021  | 42783336  | ZFP106   |
| ENSG00000103995 | 8.063812784 | 7.752033772 | protein_coding | 15 | 49005125  | 49103343  | CEP152   |
| ENSG00000104043 | 0.499066092 | 0.697730409 | protein_coding | 15 | 50150435  | 50475014  | ATP8B4   |
| ENSG00000104047 | 6.699208722 | 7.026422172 | protein_coding | 15 | 49913177  | 49937333  | DTWD1    |
| ENSG00000104055 | 1.407729925 | 1.353254395 | protein_coding | 15 | 43524793  | 43559055  | TGM5     |
| ENSG00000104059 | 1.407729925 | 0           | protein_coding | 15 | 29412457  | 29862927  | FAM189A1 |
| ENSG00000104064 | 8.261346552 | 8.226588358 | protein_coding | 15 | 50569389  | 50647605  | GABPB1   |
| ENSG00000104067 | 10.95329854 | 10.36785414 | protein_coding | 15 | 29991571  | 30261068  | TJP1     |
| ENSG00000104081 | 7.218789138 | 7.512619979 | protein_coding | 15 | 40380091  | 40401093  | BMF      |
| ENSG00000104093 | 8.324088959 | 8.309531754 | protein_coding | 15 | 51739908  | 51915030  | DMXL2    |
| ENSG00000104112 | 0.499066092 | 0           | protein_coding | 15 | 51973550  | 52013223  | SCG3     |
| ENSG00000104129 | 6.956090577 | 6.673373662 | protein_coding | 15 | 41060067  | 41099675  | DNAJC17  |
| ENSG00000104131 | 10.19511088 | 9.920915547 | protein_coding | 15 | 44829255  | 44855227  | EIF3J    |
| ENSG00000104133 | 9.211506993 | 8.882083758 | protein_coding | 15 | 44854894  | 44955876  | SPG11    |
| ENSG00000104140 | 6.699208722 | 5.150490275 | protein_coding | 15 | 41164412  | 41166487  | RHOV     |
| ENSG00000104142 | 8.886916071 | 8.984835176 | protein_coding | 15 | 41186628  | 41196173  | VPS18    |
| ENSG00000104147 | 6.032862302 | 6.775188634 | protein_coding | 15 | 41601466  | 41624819  | OIP5     |
| ENSG00000104154 | 5.550781289 | 6.515603638 | protein_coding | 15 | 45771809  | 45815005  | SLC30A4  |
| ENSG00000104164 | 8.617676359 | 8.275187599 | protein_coding | 15 | 45879321  | 45908197  | PLDN     |
| ENSG00000104177 | 1.799000381 | 0           | protein_coding | 15 | 48431625  | 48470714  | MYEF2    |
| ENSG00000104205 | 6.798966424 | 5.742946029 | protein_coding | 8  | 67579831  | 67774257  | SGK3     |
| ENSG00000104213 | 4.883502971 | 6.084484284 | protein_coding | 8  | 17433942  | 17501580  | PDGFRL   |
| ENSG00000104218 | 7.68357507  | 7.532142019 | protein_coding | 8  | 67974661  | 68108498  | CSPP1    |
| ENSG00000104219 | 8.600881464 | 9.133627746 | protein_coding | 8  | 17013538  | 17082308  | ZDHC2    |
| ENSG00000104221 | 5.763291843 | 5.683080141 | protein_coding | 8  | 37700786  | 37707459  | BRF2     |
| ENSG00000104228 | 8.325948295 | 8.116121984 | protein_coding | 8  | 27142404  | 27168836  | TRIM35   |
| ENSG00000104231 | 8.48251156  | 7.803146634 | protein_coding | 8  | 82613569  | 82645138  | ZFAND1   |
| ENSG00000104237 | 3.78787645  | 4.29708397  | protein_coding | 8  | 55471729  | 55682531  | RP1      |
| ENSG00000104267 | 2.57521082  | 1.353254395 | protein_coding | 8  | 86376081  | 86393693  | CA2      |
| ENSG00000104290 | 7.524276744 | 7.699043321 | protein_coding | 8  | 28351729  | 28431775  | FZD3     |
| ENSG00000104299 | 8.166995477 | 8.157562549 | protein_coding | 8  | 28625178  | 28747759  | INTS9    |
| ENSG00000104312 | 8.523597116 | 8.513583123 | protein_coding | 8  | 90769975  | 90803291  | RIPK2    |
| ENSG00000104313 | 0           | 0.697730409 | protein_coding | 8  | 72109668  | 72274467  | EYA1     |
| ENSG00000104320 | 9.293610409 | 9.434602747 | protein_coding | 8  | 90945564  | 91015456  | NBN      |
| ENSG00000104321 | 0.869158192 | 1.925536307 | protein_coding | 8  | 72932152  | 72987852  | TRPA1    |
| ENSG00000104324 | 4.568725997 | 6.539915281 | protein_coding | 8  | 97657455  | 98161882  |          |
| ENSG00000104325 | 7.876068031 | 8.476276902 | protein_coding | 8  | 91013633  | 91064320  | DECR1    |
| ENSG00000104327 | 2.238690726 | 0           | protein_coding | 8  | 91070836  | 91107703  | CALB1    |
| ENSG00000104331 | 9.925798469 | 10.19070543 | protein_coding | 8  | 57870492  | 57906403  | IMPAD1   |
| ENSG00000104341 | 11.18837626 | 10.9630546  | protein_coding | 8  | 98787285  | 98865241  | LAPTM4B  |
| ENSG00000104343 | 7.624369505 | 7.373448694 | protein_coding | 8  | 74692332  | 74791145  | UBE2W    |
| ENSG00000104356 | 9.296457985 | 9.003312166 | protein_coding | 8  | 99129525  | 99172062  | POP1     |
| ENSG00000104361 | 6.220467583 | 6.167968749 | protein_coding | 8  | 99202061  | 99306621  | NIPAL2   |
| ENSG00000104365 | 8.629769183 | 9.113519788 | protein_coding | 8  | 42128820  | 42189973  | IKBKB    |
| ENSG00000104368 | 8.950968668 | 9.096409785 | protein_coding | 8  | 42032236  | 42065242  | PLAT     |
| ENSG00000104369 | 6.155035276 | 0.950786998 | protein_coding | 8  | 75146935  | 75233563  | JPH1     |
| ENSG00000104375 | 7.289098491 | 6.89311646  | protein_coding | 8  | 99413631  | 99955055  | STK3     |
| ENSG00000104381 | 6.622614428 | 6.142791909 | protein_coding | 8  | 75233365  | 75401107  | GDAP1    |
| ENSG00000104388 | 9.728365606 | 9.806333433 | protein_coding | 8  | 61429416  | 61536186  | RAB2A    |
| ENSG00000104408 | 10.75261554 | 11.26528623 | protein_coding | 8  | 109213445 | 109447562 | EIF3E    |
| ENSG00000104412 | 7.565780433 | 7.635032283 | protein_coding | 8  | 109455830 | 109499145 | TTC35    |
| ENSG00000104413 | 8.508940744 | 0           | protein_coding | 8  | 95653302  | 95719694  | ESRP1    |
| ENSG00000104419 | 10.78034131 | 12.19361545 | protein_coding | 8  | 134249414 | 134314265 | NDRG1    |

|                 |             |             |                  |    |           |           |           |
|-----------------|-------------|-------------|------------------|----|-----------|-----------|-----------|
| ENSG00000104427 | 4.981125677 | 5.018301917 | protein_coding   | 8  | 79578282  | 79629935  | FAM164A   |
| ENSG00000104432 | 5.107569429 | 5.187895122 | protein_coding   | 8  | 79587978  | 79717758  | IL7       |
| ENSG00000104435 | 0.499066092 | 0           | protein_coding   | 8  | 80523049  | 80578397  | STMN2     |
| ENSG00000104442 | 9.144604451 | 8.788797839 | protein_coding   | 8  | 66514694  | 66546442  | ARMC1     |
| ENSG00000104447 | 6.121171528 | 6.716673044 | protein_coding   | 8  | 116420724 | 116821899 | TRPS1     |
| ENSG00000104450 | 6.26766507  | 6.091080508 | protein_coding   | 8  | 101170134 | 101271506 | SPAG1     |
| ENSG00000104472 | 8.020839917 | 7.752033772 | protein_coding   | 8  | 141521397 | 141527236 | CHAC1     |
| ENSG00000104490 | 0.869158192 | 0.390640832 | protein_coding   | 8  | 102698771 | 103137135 | NCALD     |
| ENSG00000104497 | 6.0776925   | 5.629711952 | protein_coding   | 8  | 82711816  | 82755101  | SNX16     |
| ENSG00000104517 | 10.09726068 | 9.827720232 | protein_coding   | 8  | 103264501 | 103425069 | UBR5      |
| ENSG00000104518 | 9.1498624   | 9.317839931 | protein_coding   | 8  | 144635377 | 144645232 | GSDMD     |
| ENSG00000104522 | 9.219530792 | 9.679673133 | protein_coding   | 8  | 144694788 | 144700218 | TSTA3     |
| ENSG00000104524 | 7.893726093 | 8.240005883 | protein_coding   | 8  | 144686083 | 144691943 | PYCR1     |
| ENSG00000104529 | 11.22918559 | 11.32613823 | protein_coding   | 8  | 144661867 | 144681711 | EEF1D     |
| ENSG00000104537 | 0.869158192 | 0           | protein_coding   | 8  | 124693034 | 124749647 | ANXA13    |
| ENSG00000104549 | 9.832093067 | 9.111898978 | protein_coding   | 8  | 126010739 | 126034525 | SQLE      |
| ENSG00000104611 | 8.894453552 | 8.721307575 | protein_coding   | 8  | 19171128  | 19253729  | SH2D4A    |
| ENSG00000104613 | 9.215524471 | 9.436546455 | protein_coding   | 8  | 19674651  | 19709594  | INTS10    |
| ENSG00000104626 | 8.380642463 | 8.272288337 | protein_coding   | 8  | 8859657   | 8974256   | ERI1      |
| ENSG00000104635 | 11.67898277 | 11.79796044 | protein_coding   | 8  | 22224762  | 22291642  | SLC39A14  |
| ENSG00000104643 | 7.250461488 | 7.298481685 | protein_coding   | 8  | 11141925  | 11185646  | MTMR9     |
| ENSG00000104660 | 8.255505039 | 8.440565301 | protein_coding   | 8  | 29952914  | 30034724  | LEPROTL1  |
| ENSG00000104671 | 6.560798025 | 7.18590274  | protein_coding   | 8  | 30013813  | 30041156  | DCTN6     |
| ENSG00000104679 | 7.161632221 | 7.389591938 | protein_coding   | 8  | 23127633  | 23153792  | R3HCC1    |
| ENSG00000104687 | 9.326487463 | 7.76240224  | protein_coding   | 8  | 30535583  | 30585443  | GSR       |
| ENSG00000104689 | 8.276809264 | 7.922602475 | protein_coding   | 8  | 23047965  | 23082639  | TNFRSF10A |
| ENSG00000104691 | 5.986594255 | 6.803579823 | processed_transc | 8  | 30589764  | 30624522  | ABXN8     |
| ENSG00000104695 | 9.106170722 | 9.14238723  | protein_coding   | 8  | 30631973  | 30671830  | PPP2CB    |
| ENSG00000104714 | 7.686472517 | 7.688207601 | protein_coding   | 8  | 564744    | 688106    | ERICH1    |
| ENSG00000104723 | 9.340351466 | 9.711058296 | protein_coding   | 8  | 15274724  | 15624158  | TUSC3     |
| ENSG00000104728 | 9.086562954 | 8.909399145 | protein_coding   | 8  | 1772142   | 1906807   | ARHGEF10  |
| ENSG00000104731 | 8.213938461 | 8.238521194 | protein_coding   | 16 | 87730091  | 87799598  | KLHDC4    |
| ENSG00000104738 | 11.16207636 | 11.21313751 | protein_coding   | 8  | 48872745  | 48890720  | MCM4      |
| ENSG00000104756 | 8.440221571 | 8.220584723 | protein_coding   | 8  | 25285366  | 25315992  | KCTD9     |
| ENSG00000104763 | 8.344411036 | 8.932538804 | protein_coding   | 8  | 17913934  | 17942494  | ASAH1     |
| ENSG00000104765 | 10.00452934 | 10.23828088 | protein_coding   | 8  | 26240414  | 26363152  | BNIP3L    |
| ENSG00000104774 | 10.77524694 | 11.32805909 | protein_coding   | 19 | 12757325  | 12777556  | MAN2B1    |
| ENSG00000104783 | 8.15239992  | 6.847095496 | protein_coding   | 19 | 44270685  | 44285409  | KCNN4     |
| ENSG00000104804 | 3.652182994 | 3.993387124 | protein_coding   | 19 | 49384222  | 49401990  | TULP2     |
| ENSG00000104805 | 10.54759526 | 10.84971493 | protein_coding   | 19 | 49403307  | 49426528  | NUCB1     |
| ENSG00000104808 | 1.407729925 | 0.697730409 | protein_coding   | 19 | 49436939  | 49448226  | DHDH      |
| ENSG00000104812 | 10.06867432 | 10.15416199 | protein_coding   | 19 | 49471382  | 49496567  | GYS1      |
| ENSG00000104814 | 2.762599152 | 3.232099092 | protein_coding   | 19 | 39078281  | 39108643  | MAP4K1    |
| ENSG00000104818 | 2.238690726 | 3.748356452 | protein_coding   | 19 | 49535130  | 49536495  | CGB2      |
| ENSG00000104823 | 6.892270075 | 6.349483465 | protein_coding   | 19 | 39306068  | 39322497  | ECH1      |
| ENSG00000104824 | 11.41009619 | 11.27636199 | protein_coding   | 19 | 39327029  | 39342987  | HNRNP1    |
| ENSG00000104825 | 7.847875458 | 8.16070152  | protein_coding   | 19 | 39390604  | 39399533  | NFKB1B    |
| ENSG00000104826 | 3.211941663 | 2.144285137 | protein_coding   | 19 | 49519237  | 49520347  | LHB       |
| ENSG00000104827 | 0.869158192 | 0.697730409 | protein_coding   | 19 | 49526128  | 49527632  | CGB       |
| ENSG00000104833 | 2.671945279 | 2.039052734 | protein_coding   | 19 | 6494331   | 6502330   | TUBB4A    |
| ENSG00000104835 | 8.576098123 | 8.573693309 | protein_coding   | 19 | 39405904  | 39466380  | FBXO17    |
| ENSG00000104848 | 4.999881834 | 3.570966319 | protein_coding   | 19 | 49570675  | 49576198  | KCNA7     |
| ENSG00000104852 | 11.15294026 | 11.15962135 | protein_coding   | 19 | 49588465  | 49611869  | SNRNP70   |
| ENSG00000104853 | 10.36071057 | 10.69620416 | protein_coding   | 19 | 45457848  | 45496598  | CLPTM1    |
| ENSG00000104856 | 9.582785382 | 9.832156695 | protein_coding   | 19 | 45504695  | 45541452  | RELB      |
| ENSG00000104859 | 9.100750797 | 9.252405772 | protein_coding   | 19 | 45542298  | 45574214  | CLASRP    |
| ENSG00000104863 | 3.393122761 | 3.781359661 | protein_coding   | 19 | 49617581  | 49621717  | LIN7B     |
| ENSG00000104866 | 8.766120079 | 9.026725794 | protein_coding   | 19 | 45595050  | 45651335  | PPP1R37   |
| ENSG00000104870 | 5.707331524 | 6.002883551 | protein_coding   | 19 | 50015536  | 50029685  | FCGRT     |
| ENSG00000104872 | 9.41997878  | 9.844897037 | protein_coding   | 19 | 49949550  | 49955115  | PIH1D1    |
| ENSG00000104879 | 1.16343121  | 0.390640832 | protein_coding   | 19 | 45809672  | 45826233  | CKM       |
| ENSG00000104880 | 10.21932096 | 9.942961378 | protein_coding   | 19 | 7459999   | 7537370   | ARHGEF18  |
| ENSG00000104881 | 8.866621448 | 8.500015927 | protein_coding   | 19 | 45882892  | 45909607  | PPP1R13L  |

|                 |             |             |                  |    |          |          |          |
|-----------------|-------------|-------------|------------------|----|----------|----------|----------|
| ENSG00000104883 | 5.239686603 | 4.932754837 | protein_coding   | 19 | 7541761  | 7553905  | PEX11G   |
| ENSG00000104884 | 8.625246244 | 8.444434101 | protein_coding   | 19 | 45854246 | 45873876 | ERCC2    |
| ENSG00000104885 | 10.87291199 | 10.93834688 | protein_coding   | 19 | 2164148  | 2232577  | DOT1L    |
| ENSG00000104886 | 8.953376332 | 8.871585941 | protein_coding   | 19 | 2233155  | 2236319  | PLEKHJ1  |
| ENSG00000104888 | 3.077135474 | 2.851901313 | protein_coding   | 19 | 49932656 | 49945617 | SLC17A7  |
| ENSG00000104889 | 10.20978632 | 10.66863094 | protein_coding   | 19 | 12917428 | 12924462 | RNASEH2A |
| ENSG00000104892 | 6.171673665 | 5.018301917 | protein_coding   | 19 | 45843998 | 45854778 | KLC3     |
| ENSG00000104894 | 4.6658819   | 4.075511708 | protein_coding   | 19 | 49838428 | 49843859 | CD37     |
| ENSG00000104897 | 10.92505666 | 10.88478007 | protein_coding   | 19 | 2236816  | 2248677  | SF3A2    |
| ENSG00000104899 | 8.576098123 | 9.336696989 | protein_coding   | 19 | 2249113  | 2252072  | AMH      |
| ENSG00000104901 | 2.35979773  | 3.368666104 | protein_coding   | 19 | 49867042 | 49878371 | DKKL1    |
| ENSG00000104903 | 5.637181576 | 5.784235782 | protein_coding   | 19 | 13209848 | 13213681 | LYL1     |
| ENSG00000104904 | 12.91171191 | 13.24215198 | protein_coding   | 19 | 2269520  | 2273487  | OAZ1     |
| ENSG00000104907 | 10.74464467 | 11.25063056 | protein_coding   | 19 | 13215716 | 13227563 | TRMT1    |
| ENSG00000104915 | 10.28722112 | 9.841477998 | protein_coding   | 19 | 13254903 | 13261052 | STX10    |
| ENSG00000104936 | 8.727254249 | 8.535512415 | protein_coding   | 19 | 46272978 | 46285815 | DMPK     |
| ENSG00000104938 | 0.869158192 | 0           | protein_coding   | 19 | 7828035  | 7834490  | CLEC4M   |
| ENSG00000104941 | 0.499066092 | 0           | protein_coding   | 19 | 46298968 | 46318605 | RSPH6A   |
| ENSG00000104946 | 7.692250012 | 7.664078611 | protein_coding   | 19 | 50380682 | 50392006 | TBC1D17  |
| ENSG00000104951 | 3.744048221 | 4.932754837 | protein_coding   | 19 | 50392916 | 50432796 | IL4I1    |
| ENSG00000104953 | 3.554067925 | 3.608232228 | protein_coding   | 19 | 2977444  | 2995177  | TLE6     |
| ENSG00000104957 | 8.070482475 | 8.390640789 | protein_coding   | 19 | 13842574 | 13874106 | CCDC130  |
| ENSG00000104960 | 9.657041774 | 9.549819822 | protein_coding   | 19 | 50354138 | 50363990 | PTOV1    |
| ENSG00000104964 | 11.43550666 | 11.5870971  | protein_coding   | 19 | 3052908  | 3062964  | AES      |
| ENSG00000104967 | 1.16343121  | 0.697730409 | protein_coding   | 19 | 46442771 | 46476657 | NOVA2    |
| ENSG00000104969 | 11.27007994 | 11.37222466 | protein_coding   | 19 | 2754712  | 2783354  | SGTA     |
| ENSG00000104972 | 0           | 0.390640832 | protein_coding   | 19 | 55085346 | 55148979 | LILRB1   |
| ENSG00000104973 | 9.429522058 | 9.29944532  | protein_coding   | 19 | 50321536 | 50342036 | MED25    |
| ENSG00000104976 | 8.368064704 | 8.060069742 | protein_coding   | 19 | 7985194  | 7998843  | SNAPC2   |
| ENSG00000104979 | 9.98230137  | 10.42379484 | protein_coding   | 19 | 13885257 | 13889582 | C19orf53 |
| ENSG00000104980 | 9.915339294 | 10.33835587 | protein_coding   | 19 | 7991604  | 8008708  | TIMM44   |
| ENSG00000104983 | 4.842525946 | 4.932754837 | protein_coding   | 19 | 46498339 | 46521874 | CCDC61   |
| ENSG00000104998 | 9.164483521 | 8.962525691 | protein_coding   | 19 | 14142262 | 14164026 | IL27RA   |
| ENSG00000105011 | 9.886021803 | 10.04288547 | protein_coding   | 19 | 14230321 | 14247768 | ASF1B    |
| ENSG00000105048 | 10.09126063 | 10.17332668 | protein_coding   | 19 | 55644162 | 55660606 | TNNT1    |
| ENSG00000105053 | 7.484876093 | 7.465168131 | protein_coding   | 19 | 50479726 | 50528805 | VRK3     |
| ENSG00000105058 | 9.852875742 | 10.23157969 | protein_coding   | 19 | 16296235 | 16302855 | FAM32A   |
| ENSG00000105063 | 11.48606281 | 11.07563806 | protein_coding   | 19 | 55741148 | 55770363 | PPP6R1   |
| ENSG00000105072 | 7.511262389 | 7.575124073 | protein_coding   | 19 | 16607205 | 16632163 | C19orf44 |
| ENSG00000105085 | 7.348842929 | 7.329495501 | protein_coding   | 19 | 16685718 | 16739015 | MED26    |
| ENSG00000105088 | 5.239686603 | 3.96493948  | protein_coding   | 19 | 9964395  | 10047070 | OLFM2    |
| ENSG00000105122 | 0           | 0.390640832 | protein_coding   | 19 | 15562438 | 15575382 | RASAL3   |
| ENSG00000105127 | 9.4441477   | 9.323452948 | protein_coding   | 19 | 15464341 | 15490603 | AKAP8    |
| ENSG00000105131 | 5.417620896 | 4.075511708 | protein_coding   | 19 | 15337730 | 15343858 | EPHX3    |
| ENSG00000105132 | 3.274897671 | 4.048652948 | processed_transc | 19 | 58053208 | 58071231 | ZNF550   |
| ENSG00000105135 | 9.665877245 | 10.04033143 | protein_coding   | 19 | 15225795 | 15236596 | ILVBL    |
| ENSG00000105136 | 6.9512803   | 7.266786485 | protein_coding   | 19 | 57986988 | 58006048 | ZNF419   |
| ENSG00000105137 | 8.889432943 | 9.787165921 | protein_coding   | 19 | 15218214 | 15225789 | SYDE1    |
| ENSG00000105141 | 0           | 0.390640832 | protein_coding   | 19 | 15160291 | 15166900 | CASP14   |
| ENSG00000105146 | 3.989024711 | 3.368666104 | protein_coding   | 19 | 57742377 | 57746915 | AURKC    |
| ENSG00000105171 | 8.016241092 | 8.165397208 | protein_coding   | 19 | 30097170 | 30108162 | POP4     |
| ENSG00000105173 | 7.491518048 | 7.495318771 | protein_coding   | 19 | 30302901 | 30315216 | CNCE1    |
| ENSG00000105176 | 9.559268022 | 9.577682064 | protein_coding   | 19 | 30414551 | 30506611 | URI1     |
| ENSG00000105185 | 8.981959173 | 9.830186618 | protein_coding   | 19 | 33072096 | 33078322 | PDCC5    |
| ENSG00000105186 | 9.27062517  | 8.765275934 | protein_coding   | 19 | 33087907 | 33166102 | ANKRD27  |
| ENSG00000105193 | 10.80354643 | 11.2101107  | protein_coding   | 19 | 39923852 | 39926618 | RPS16    |
| ENSG00000105197 | 8.625246244 | 8.887777807 | protein_coding   | 19 | 39971052 | 39981528 | TIMM50   |
| ENSG00000105202 | 10.27042264 | 10.22522208 | protein_coding   | 19 | 40325094 | 40337054 | FBL      |
| ENSG00000105204 | 5.977159882 | 6.568558581 | protein_coding   | 19 | 40315993 | 40324841 | DYRK1B   |
| ENSG00000105219 | 2.847891871 | 1.353254395 | protein_coding   | 19 | 40728115 | 40732597 | CNTD2    |
| ENSG00000105220 | 12.6832119  | 12.20230485 | protein_coding   | 19 | 34855645 | 34893318 | GPI      |
| ENSG00000105221 | 9.549752678 | 9.416334062 | protein_coding   | 19 | 40736224 | 40791302 | AKT2     |
| ENSG00000105223 | 9.633212506 | 10.2541644  | protein_coding   | 19 | 40854491 | 40886346 | PLD3     |

|                 |             |             |                |    |           |           |          |
|-----------------|-------------|-------------|----------------|----|-----------|-----------|----------|
| ENSG00000105227 | 5.054730169 | 4.777836593 | protein_coding | 19 | 40899672  | 40919273  | PRX      |
| ENSG00000105229 | 9.255095676 | 9.160532436 | protein_coding | 19 | 4007748   | 4039383   | PIAS4    |
| ENSG00000105245 | 7.700873103 | 6.827478203 | protein_coding | 19 | 41171810  | 41196556  | NUMBL    |
| ENSG00000105246 | 7.402691859 | 8.508664347 | protein_coding | 19 | 4229540   | 4237515   | EBI3     |
| ENSG00000105248 | 8.830404061 | 8.935290787 | protein_coding | 19 | 4247087   | 4269083   | CCDC94   |
| ENSG00000105251 | 2.847891871 | 2.144285137 | protein_coding | 19 | 4278598   | 4290721   | SHD      |
| ENSG00000105254 | 9.02723139  | 9.242070261 | protein_coding | 19 | 36605888  | 36616847  | TBCB     |
| ENSG00000105255 | 2.57521082  | 2.144285137 | protein_coding | 19 | 4304591   | 4323843   | FSD1     |
| ENSG00000105258 | 7.639400234 | 8.071789292 | protein_coding | 19 | 36604612  | 36606206  | POLR2I   |
| ENSG00000105261 | 1.407729925 | 2.039052734 | protein_coding | 19 | 36602105  | 36604613  | OVOL3    |
| ENSG00000105270 | 4.883502971 | 5.137803333 | protein_coding | 19 | 36505563  | 36523775  | CLIP3    |
| ENSG00000105278 | 5.316509574 | 4.048652948 | protein_coding | 19 | 3804022   | 3869027   | ZFR2     |
| ENSG00000105281 | 11.95893816 | 11.96033084 | protein_coding | 19 | 47278140  | 47291851  | SLC1A5   |
| ENSG00000105287 | 9.068907253 | 8.423679567 | protein_coding | 19 | 47177574  | 47220384  | PRKD2    |
| ENSG00000105289 | 5.223818625 | 3.96493948  | protein_coding | 19 | 3708382   | 3750810   | TJP3     |
| ENSG00000105290 | 6.984620223 | 7.625976011 | protein_coding | 19 | 36359138  | 36370699  | APLP1    |
| ENSG00000105298 | 8.620709081 | 8.633659743 | protein_coding | 19 | 3610626   | 3626813   | C19orf29 |
| ENSG00000105321 | 7.876068031 | 7.351639476 | protein_coding | 19 | 47759731  | 47775208  | CCDC9    |
| ENSG00000105323 | 11.03683924 | 10.73040795 | protein_coding | 19 | 41768391  | 41813811  | HNRNPUL1 |
| ENSG00000105325 | 10.03155637 | 10.06189795 | protein_coding | 19 | 3506295   | 3536755   | FZR1     |
| ENSG00000105327 | 6.882196036 | 7.260948155 | protein_coding | 19 | 47724079  | 47736023  | BBC3     |
| ENSG00000105329 | 9.437283511 | 9.227924003 | protein_coding | 19 | 41836813  | 41859831  | TGFB1    |
| ENSG00000105339 | 6.62865285  | 4.94736961  | protein_coding | 8  | 142127377 | 142205907 | DENND3   |
| ENSG00000105341 | 7.454602977 | 7.546612122 | protein_coding | 19 | 41937224  | 42006550  | ATP5SL   |
| ENSG00000105355 | 11.11419304 | 10.57085065 | protein_coding | 19 | 4838346   | 4867780   | PLIN3    |
| ENSG00000105357 | 8.929116952 | 8.924251218 | protein_coding | 19 | 50706885  | 50813802  | MYH14    |
| ENSG00000105364 | 11.18479473 | 11.2674718  | protein_coding | 19 | 10362640  | 10370736  | MRPL4    |
| ENSG00000105369 | 1.799000381 | 0.950786998 | protein_coding | 19 | 42381190  | 42385439  | CD79A    |
| ENSG00000105370 | 0           | 0.390640832 | protein_coding | 19 | 51883164  | 51891210  | LIM2     |
| ENSG00000105371 | 2.57521082  | 1.925536307 | protein_coding | 19 | 10397650  | 10399198  | ICAM4    |
| ENSG00000105372 | 11.33799045 | 11.80762974 | protein_coding | 19 | 42363988  | 42375482  | RPS19    |
| ENSG00000105373 | 10.59231022 | 10.47764716 | protein_coding | 19 | 48248793  | 48260323  | GLTSCR2  |
| ENSG00000105374 | 0           | 0.390640832 | protein_coding | 19 | 51874874  | 51875960  | NKG7     |
| ENSG00000105376 | 7.434062125 | 6.3217081   | protein_coding | 19 | 10400655  | 10407453  | ICAM5    |
| ENSG00000105379 | 9.646664866 | 9.969605823 | protein_coding | 19 | 51848410  | 51869672  | ETFB     |
| ENSG00000105388 | 0.499066092 | 0           | protein_coding | 19 | 42212504  | 42234339  | CEACAM5  |
| ENSG00000105393 | 10.23721557 | 10.41626325 | protein_coding | 19 | 17378232  | 17390162  | BABAM1   |
| ENSG00000105397 | 11.4374429  | 11.56401869 | protein_coding | 19 | 10461209  | 10491352  | TYK2     |
| ENSG00000105401 | 12.48954875 | 12.65223146 | protein_coding | 19 | 10501809  | 10514271  | CDC37    |
| ENSG00000105402 | 9.409495425 | 9.982524041 | protein_coding | 19 | 47990891  | 48018497  | NAPA     |
| ENSG00000105404 | 8.243750574 | 8.737164829 | protein_coding | 19 | 42460838  | 42463528  | RABAC1   |
| ENSG00000105419 | 6.892270075 | 7.00911166  | protein_coding | 19 | 47906316  | 47922780  | MEIS3    |
| ENSG00000105426 | 12.11292561 | 11.41868818 | protein_coding | 19 | 5173977   | 5340814   | PTPRS    |
| ENSG00000105427 | 3.502389126 | 3.845183986 | protein_coding | 19 | 42891173  | 42894444  | CNFN     |
| ENSG00000105429 | 8.368064704 | 8.347216179 | protein_coding | 19 | 42829761  | 42882921  | MEGF8    |
| ENSG00000105438 | 10.81782106 | 10.67961414 | protein_coding | 19 | 48885827  | 48894810  | KDELRL1  |
| ENSG00000105443 | 9.208486525 | 9.494294562 | protein_coding | 19 | 48972289  | 48985571  | CYTH2    |
| ENSG00000105447 | 9.281205548 | 9.290875744 | protein_coding | 19 | 48949030  | 48957164  | GRWD1    |
| ENSG00000105464 | 8.500733514 | 8.088368066 | protein_coding | 19 | 48898132  | 48948187  | GRIN2D   |
| ENSG00000105467 | 1.407729925 | 0           | protein_coding | 19 | 48867657  | 48879627  | SYNGR4   |
| ENSG00000105472 | 4.261916566 | 5.751299057 | protein_coding | 19 | 51226605  | 51228979  | CLEC11A  |
| ENSG00000105479 | 3.652182994 | 4.319727133 | protein_coding | 19 | 48799714  | 48825130  | CCDC114  |
| ENSG00000105483 | 7.67776266  | 8.232567113 | protein_coding | 19 | 48706403  | 48759203  | CARD8    |
| ENSG00000105486 | 9.202426553 | 9.242810972 | protein_coding | 19 | 48618703  | 48673601  | LIG1     |
| ENSG00000105497 | 6.283060568 | 6.651226688 | protein_coding | 19 | 52074551  | 52092991  | ZNF175   |
| ENSG00000105499 | 6.616550626 | 7.563312496 | protein_coding | 19 | 48551100  | 48614109  | PLA2G4C  |
| ENSG00000105501 | 0.499066092 | 0.697730409 | protein_coding | 19 | 52114781  | 52150151  | SIGLEC5  |
| ENSG00000105509 | 0.869158192 | 1.802319292 | protein_coding | 19 | 52216365  | 52227237  | HAS1     |
| ENSG00000105514 | 10.47026584 | 9.132029383 | protein_coding | 19 | 11432723  | 11450344  | RAB3D    |
| ENSG00000105516 | 4.842525946 | 4.604259349 | protein_coding | 19 | 49133820  | 49140639  | DBP      |
| ENSG00000105518 | 10.11618743 | 10.51798133 | protein_coding | 19 | 11453452  | 11456981  | TMEM205  |
| ENSG00000105519 | 8.53328596  | 6.387491945 | protein_coding | 19 | 5911386   | 5916219   | CAPS     |
| ENSG00000105520 | 10.60767691 | 10.84922862 | protein_coding | 19 | 11466062  | 11476370  |          |

|                 |             |             |                |    |          |          |         |
|-----------------|-------------|-------------|----------------|----|----------|----------|---------|
| ENSG00000105523 | 1.960915222 | 0.697730409 | protein_coding | 19 | 49103857 | 49116694 | FAM83E  |
| ENSG00000105538 | 3.871730003 | 4.448594745 | protein_coding | 19 | 49223843 | 49243970 | RASIP1  |
| ENSG00000105549 | 0.499066092 | 1.353254395 | protein_coding | 19 | 361750   | 376013   | THEG    |
| ENSG00000105550 | 2.10647801  | 1.353254395 | protein_coding | 19 | 49259344 | 49261580 | FGF21   |
| ENSG00000105552 | 9.126582713 | 9.245770021 | protein_coding | 19 | 49298322 | 49314320 | BCAT2   |
| ENSG00000105556 | 9.090943324 | 9.029304007 | protein_coding | 19 | 305575   | 344791   | MIER2   |
| ENSG00000105559 | 7.511262389 | 7.100213554 | protein_coding | 19 | 49340355 | 49371884 | PLEKHA4 |
| ENSG00000105568 | 12.54607477 | 12.53753354 | protein_coding | 19 | 52693274 | 52730687 | PPP2R1A |
| ENSG00000105576 | 11.81229071 | 11.96370446 | protein_coding | 19 | 12810008 | 12834810 | TNPO2   |
| ENSG00000105583 | 9.834054211 | 10.39176091 | protein_coding | 19 | 12778881 | 12780465 | WDR83OS |
| ENSG00000105605 | 0           | 0.697730409 | protein_coding | 19 | 54412589 | 54447195 | CACNG7  |
| ENSG00000105607 | 9.506139483 | 9.925997554 | protein_coding | 19 | 13001974 | 13010783 | GCDH    |
| ENSG00000105609 | 0.499066092 | 2.242360793 | protein_coding | 19 | 54754263 | 54761167 | LILRB5  |
| ENSG00000105610 | 2.238690726 | 3.64455972  | protein_coding | 19 | 12995236 | 12998017 | KLF1    |
| ENSG00000105612 | 10.28004571 | 10.38774804 | protein_coding | 19 | 12986023 | 12992335 | DNASE2  |
| ENSG00000105613 | 7.420203928 | 6.299096252 | protein_coding | 19 | 12949259 | 12985765 | MAST1   |
| ENSG00000105617 | 6.931877181 | 6.862599506 | protein_coding | 19 | 54658899 | 54663620 | LENG1   |
| ENSG00000105618 | 10.00742874 | 10.054323   | protein_coding | 19 | 54618837 | 54635140 | PRPF31  |
| ENSG00000105619 | 7.242608348 | 7.596144237 | protein_coding | 19 | 54610320 | 54619055 | TFPT    |
| ENSG00000105639 | 7.206730419 | 6.343971006 | protein_coding | 19 | 17935589 | 17958880 | JAK3    |
| ENSG00000105640 | 10.01263302 | 10.31000998 | protein_coding | 19 | 17970730 | 17974962 | RPL18A  |
| ENSG00000105641 | 4.292665995 | 3.133298822 | protein_coding | 19 | 17982782 | 18005982 | SLC5A5  |
| ENSG00000105642 | 3.077135474 | 2.501982735 | protein_coding | 19 | 18062111 | 18110893 | KCNN1   |
| ENSG00000105643 | 8.286389971 | 8.804937616 | protein_coding | 19 | 18111944 | 18124903 | ARRDC2  |
| ENSG00000105647 | 11.0234384  | 10.86807433 | protein_coding | 19 | 18263928 | 18281343 | PIK3R2  |
| ENSG00000105649 | 3.603959378 | 3.081239798 | protein_coding | 19 | 18307594 | 18314839 | RAB3A   |
| ENSG00000105650 | 2.847891871 | 3.453019579 | protein_coding | 19 | 18318771 | 18359010 | PDE4C   |
| ENSG00000105655 | 10.4375331  | 10.06021806 | protein_coding | 19 | 18545198 | 18549111 | ISYNA1  |
| ENSG00000105656 | 8.580777545 | 8.900977169 | protein_coding | 19 | 18553475 | 18632937 | ELL     |
| ENSG00000105662 | 8.724437638 | 8.754928172 | protein_coding | 19 | 18794425 | 18893142 | CRTC1   |
| ENSG00000105663 | 9.875269153 | 9.570619293 | protein_coding | 19 | 36208921 | 36229779 |         |
| ENSG00000105664 | 0.499066092 | 0           | protein_coding | 19 | 18893583 | 18902123 | COMP    |
| ENSG00000105668 | 1.616589159 | 2.721932731 | protein_coding | 19 | 36157715 | 36169367 | UPK1A   |
| ENSG00000105669 | 11.15451056 | 11.54657683 | protein_coding | 19 | 19010323 | 19030199 | COPE    |
| ENSG00000105671 | 10.12475765 | 10.46246481 | protein_coding | 19 | 19030484 | 19039442 | DDX49   |
| ENSG00000105672 | 2.671945279 | 2.579085888 | protein_coding | 19 | 36132647 | 36135773 | ETV2    |
| ENSG00000105675 | 0.499066092 | 0           | protein_coding | 19 | 36041096 | 36054560 | ATP4A   |
| ENSG00000105676 | 10.12849117 | 10.13513829 | protein_coding | 19 | 19144384 | 19170563 | ARMC6   |
| ENSG00000105677 | 9.364975797 | 9.635231414 | protein_coding | 19 | 36036532 | 36038428 | TMEM147 |
| ENSG00000105679 | 4.437288965 | 5.004391715 | protein_coding | 19 | 36024314 | 36036221 | GAPDHS  |
| ENSG00000105694 | 0.499066092 | 0.950786998 | protein_coding | 19 | 2538108  | 2538786  |         |
| ENSG00000105695 | 0           | 0.697730409 | protein_coding | 19 | 35783028 | 35804707 | MAG     |
| ENSG00000105696 | 2.847891871 | 2.652276565 | protein_coding | 19 | 18723682 | 18731841 | TMEM59L |
| ENSG00000105698 | 9.13084342  | 9.388489822 | protein_coding | 19 | 35759896 | 35770718 | USF2    |
| ENSG00000105699 | 9.863155878 | 8.935290787 | protein_coding | 19 | 35739559 | 35758865 | LSR     |
| ENSG00000105700 | 10.38097398 | 10.58610742 | protein_coding | 19 | 18668572 | 18680197 | KXD1    |
| ENSG00000105701 | 11.89022848 | 11.88499174 | protein_coding | 19 | 18642568 | 18654383 | FKBP8   |
| ENSG00000105705 | 8.577659618 | 8.89250574  | protein_coding | 19 | 19387323 | 19431318 | SUGP1   |
| ENSG00000105707 | 2.671945279 | 3.813624741 | protein_coding | 19 | 35531410 | 35557475 | HPN     |
| ENSG00000105708 | 7.304268146 | 7.240325909 | protein_coding | 19 | 19821282 | 19843921 | ZNF14   |
| ENSG00000105711 | 6.171673665 | 6.582669759 | protein_coding | 19 | 35521592 | 35531352 | SCN1B   |
| ENSG00000105717 | 6.777386522 | 6.554308016 | protein_coding | 19 | 19672522 | 19729725 | PBX4    |
| ENSG00000105722 | 8.380642463 | 8.036341107 | protein_coding | 19 | 42751717 | 42759309 | ERF     |
| ENSG00000105723 | 8.626755466 | 8.461080043 | protein_coding | 19 | 42734338 | 42746777 | GSK3A   |
| ENSG00000105726 | 10.86909148 | 11.2104894  | protein_coding | 19 | 19756007 | 19774502 | ATP13A1 |
| ENSG00000105732 | 6.979904289 | 7.167295693 | protein_coding | 19 | 42572864 | 42585717 | ZNF574  |
| ENSG00000105737 | 2.847891871 | 2.579085888 | protein_coding | 19 | 42502477 | 42569957 | GRIK5   |
| ENSG00000105738 | 9.9657009   | 9.548022979 | protein_coding | 19 | 38397861 | 38699012 | SIPA1L3 |
| ENSG00000105750 | 7.434062125 | 7.784953917 | protein_coding | 19 | 21106059 | 21133503 | ZNF85   |
| ENSG00000105755 | 7.234712227 | 6.646756201 | protein_coding | 19 | 44010872 | 44031396 | ETHE1   |
| ENSG00000105767 | 5.512107582 | 5.871116342 | protein_coding | 19 | 44126522 | 44143991 | CADM4   |
| ENSG00000105771 | 8.197783135 | 8.276635048 | protein_coding | 19 | 44235301 | 44259142 | SMG9    |
| ENSG00000105778 | 9.675388335 | 9.031020259 | protein_coding | 7  | 32535038 | 33078516 | AVL9    |

|                 |             |             |                |    |           |           |          |
|-----------------|-------------|-------------|----------------|----|-----------|-----------|----------|
| ENSG00000105784 | 1.16343121  | 0.390640832 | protein_coding | 7  | 87256864  | 87461611  | RUNDC3B  |
| ENSG00000105792 | 5.054730169 | 4.250702764 | protein_coding | 7  | 89874488  | 89940377  | C7orf63  |
| ENSG00000105793 | 7.484876093 | 7.418726742 | protein_coding | 7  | 89964537  | 90020769  | GTPBP10  |
| ENSG00000105808 | 4.734682531 | 4.448594745 | protein_coding | 7  | 102220093 | 102283316 | RASA4    |
| ENSG00000105810 | 10.38499274 | 10.27205358 | protein_coding | 7  | 92234235  | 92465908  | CDK6     |
| ENSG00000105819 | 9.551342933 | 9.514064455 | protein_coding | 7  | 102937869 | 102969958 | PMPCB    |
| ENSG00000105821 | 9.111570361 | 8.983063058 | protein_coding | 7  | 102952921 | 102985320 | DNAJC2   |
| ENSG00000105825 | 7.819120959 | 8.814934048 | protein_coding | 7  | 93514709  | 93520303  | TFPI2    |
| ENSG00000105829 | 7.883662252 | 8.034631177 | protein_coding | 7  | 93592074  | 93633694  | BET1     |
| ENSG00000105835 | 12.01144078 | 12.05541466 | protein_coding | 7  | 105888731 | 105926772 | NAMPT    |
| ENSG00000105849 | 8.908170811 | 8.674859633 | protein_coding | 7  | 19735085  | 19748710  | TWISTNB  |
| ENSG00000105851 | 0           | 0.390640832 | protein_coding | 7  | 106505723 | 106547590 | PIK3CG   |
| ENSG00000105852 | 0.869158192 | 0.390640832 | protein_coding | 7  | 94989256  | 95025680  | PON3     |
| ENSG00000105854 | 8.894453552 | 8.93712253  | protein_coding | 7  | 95034175  | 95064510  | PON2     |
| ENSG00000105855 | 3.448790144 | 3.081239798 | protein_coding | 7  | 20370325  | 20450419  | ITGB8    |
| ENSG00000105856 | 8.299696963 | 8.681431211 | protein_coding | 7  | 106809406 | 106842974 | HBP1     |
| ENSG00000105865 | 7.071412799 | 6.480864016 | protein_coding | 7  | 107203929 | 107218906 | DUS4L    |
| ENSG00000105866 | 7.246540262 | 7.002128877 | protein_coding | 7  | 21467652  | 21554440  | SP4      |
| ENSG00000105875 | 6.872051157 | 6.465715653 | protein_coding | 7  | 134868590 | 134896316 | WDR91    |
| ENSG00000105877 | 8.036821332 | 8.401295742 | protein_coding | 7  | 21582833  | 21941457  | DNAH11   |
| ENSG00000105879 | 8.574534937 | 8.046558348 | protein_coding | 7  | 107384142 | 107401142 | CBLL1    |
| ENSG00000105887 | 10.24853313 | 9.564114571 | protein_coding | 7  | 135611509 | 135662101 | MTPN     |
| ENSG00000105889 | 3.077135474 | 3.133298822 | protein_coding | 7  | 22459063  | 22672544  | STEAP1B  |
| ENSG00000105894 | 2.57521082  | 2.652276565 | protein_coding | 7  | 136912088 | 137028611 | PTN      |
| ENSG00000105926 | 8.793254009 | 8.486319932 | protein_coding | 7  | 24612887  | 24729159  | MPP6     |
| ENSG00000105928 | 5.613019223 | 5.466810074 | protein_coding | 7  | 24737972  | 24809244  | DFNA5    |
| ENSG00000105929 | 0.499066092 | 1.16600992  | protein_coding | 7  | 138391040 | 138484305 | ATP6VOA4 |
| ENSG00000105939 | 10.7796631  | 9.881029944 | protein_coding | 7  | 138728266 | 138794465 | ZC3HAV1  |
| ENSG00000105948 | 7.759833327 | 7.487839978 | protein_coding | 7  | 138818490 | 138876732 | TTC26    |
| ENSG00000105953 | 11.29639666 | 10.4179039  | protein_coding | 7  | 44646171  | 44748665  | OGDH     |
| ENSG00000105963 | 7.813830732 | 6.787424764 | protein_coding | 7  | 937540    | 995043    | ADAP1    |
| ENSG00000105968 | 10.67268056 | 10.6147154  | protein_coding | 7  | 44866390  | 44887682  | H2AFV    |
| ENSG00000105971 | 10.30004761 | 8.823871996 | protein_coding | 7  | 115927434 | 116148595 | CAV2     |
| ENSG00000105974 | 12.39573703 | 11.60521124 | protein_coding | 7  | 116164839 | 116201233 | CAV1     |
| ENSG00000105976 | 11.16207636 | 10.81227999 | protein_coding | 7  | 116312248 | 116438440 | MET      |
| ENSG00000105982 | 5.107569429 | 5.236305879 | protein_coding | 7  | 156432975 | 156469824 | RNF32    |
| ENSG00000105983 | 9.4441477   | 9.072443042 | protein_coding | 7  | 156473571 | 156685924 | LMBR1    |
| ENSG00000105988 | 0.869158192 | 0.950786998 | pseudogene     | 10 | 93976089  | 93976550  | NHP2P1   |
| ENSG00000105991 | 1.407729925 | 0.697730409 | protein_coding | 7  | 27132612  | 27135615  | HOXA1    |
| ENSG00000105993 | 10.51251323 | 10.07151953 | protein_coding | 7  | 157128075 | 157210133 | DNAJB6   |
| ENSG00000105996 | 1.16343121  | 0.697730409 | protein_coding | 7  | 27139721  | 27142430  | HOXA2    |
| ENSG00000105997 | 3.004694206 | 2.420525079 | protein_coding | 7  | 27145816  | 27192200  | HOXA3    |
| ENSG00000106003 | 7.988335976 | 7.18590274  | protein_coding | 7  | 2552163   | 2568811   | LFNG     |
| ENSG00000106004 | 3.502389126 | 2.912743273 | protein_coding | 7  | 27180671  | 27183287  | HOXA5    |
| ENSG00000106006 | 1.407729925 | 2.039052734 | protein_coding | 7  | 27185015  | 27192217  | HOXA6    |
| ENSG00000106009 | 10.1086465  | 9.632407821 | protein_coding | 7  | 2577511   | 2595361   | BRAT1    |
| ENSG00000106012 | 9.189208632 | 8.605140645 | protein_coding | 7  | 2598632   | 2654368   | IQCE     |
| ENSG00000106018 | 0.869158192 | 0.390640832 | protein_coding | 7  | 158820866 | 158937649 | VIPR2    |
| ENSG00000106025 | 5.718698586 | 6.403479675 | protein_coding | 7  | 120427376 | 120498456 | TSPAN12  |
| ENSG00000106028 | 9.95852752  | 9.987393954 | protein_coding | 7  | 141438121 | 141487722 | SSBP1    |
| ENSG00000106031 | 2.928422289 | 0.950786998 | protein_coding | 7  | 27233122  | 27239725  | HOXA13   |
| ENSG00000106034 | 6.290697143 | 4.250702764 | protein_coding | 7  | 120628731 | 120937498 | C7orf58  |
| ENSG00000106038 | 1.799000381 | 1.353254395 | protein_coding | 7  | 27282164  | 27287047  | EVX1     |
| ENSG00000106049 | 10.32582812 | 10.02103068 | protein_coding | 7  | 27565061  | 27702614  | HIBADH   |
| ENSG00000106052 | 10.63680476 | 10.62355806 | protein_coding | 7  | 27778950  | 27880938  | TAX1BP1  |
| ENSG00000106069 | 2.35979773  | 1.518964905 | protein_coding | 7  | 29186185  | 29553944  | CHN2     |
| ENSG00000106070 | 10.50760669 | 10.14309534 | protein_coding | 7  | 50657760  | 50861159  | GRB10    |
| ENSG00000106077 | 7.319279953 | 6.440109466 | protein_coding | 7  | 73150424  | 73153197  | ABHD11   |
| ENSG00000106078 | 7.190493718 | 5.112089758 | protein_coding | 7  | 51083909  | 51384515  | COBL     |
| ENSG00000106080 | 9.224523099 | 8.735060572 | protein_coding | 7  | 30050203  | 30066300  | FKBP14   |
| ENSG00000106086 | 7.254372086 | 7.237355663 | protein_coding | 7  | 30067020  | 30170096  | PLEKHA8  |
| ENSG00000106089 | 7.819120959 | 7.307006333 | protein_coding | 7  | 73113535  | 73134017  | STX1A    |
| ENSG00000106100 | 7.837485466 | 7.337839373 | protein_coding | 7  | 30464143  | 30518400  | NOD1     |



|                 |             |             |                  |   |           |           |          |
|-----------------|-------------|-------------|------------------|---|-----------|-----------|----------|
| ENSG00000106105 | 12.28073386 | 12.14054918 | protein_coding   | 7 | 30634297  | 30673649  | GARS     |
| ENSG00000106113 | 2.762599152 | 2.912743273 | protein_coding   | 7 | 30692200  | 30739745  | CRHR2    |
| ENSG00000106123 | 3.274897671 | 0.390640832 | protein_coding   | 7 | 142552792 | 142568847 | EPHB6    |
| ENSG00000106125 | 3.911897206 | 4.406904905 | protein_coding   | 7 | 30811033  | 30932002  | FAM188B  |
| ENSG00000106133 | 2.35979773  | 1.925536307 | pseudogene       | 7 | 72418832  | 72425329  | NSUN5P2  |
| ENSG00000106144 | 9.581229429 | 8.762179391 | protein_coding   | 7 | 142985308 | 143004789 | CASP2    |
| ENSG00000106153 | 11.08895774 | 11.47099045 | protein_coding   | 7 | 56169262  | 56174269  | CHCHD2   |
| ENSG00000106178 | 1.616589159 |             | 0 protein_coding | 7 | 75440983  | 75452674  | CCL24    |
| ENSG00000106211 | 12.30650561 | 12.14590491 | protein_coding   | 7 | 75931861  | 75933612  | HSPB1    |
| ENSG00000106236 | 0.869158192 |             | 0 protein_coding | 7 | 98246609  | 98259180  | NPTX2    |
| ENSG00000106244 | 10.71834247 | 10.27169071 | protein_coding   | 7 | 98989671  | 99006452  | PDAP1    |
| ENSG00000106245 | 8.605481314 | 8.463623996 | protein_coding   | 7 | 99006264  | 99017239  | BUD31    |
| ENSG00000106246 | 6.25990527  | 5.893930351 | protein_coding   | 7 | 99014362  | 99063820  | PTCD1    |
| ENSG00000106258 | 1.799000381 | 1.518964905 | protein_coding   | 7 | 99245817  | 99277621  | CYP3A5   |
| ENSG00000106261 | 9.49130376  | 9.189251987 | protein_coding   | 7 | 99613204  | 99639312  | ZKSCAN1  |
| ENSG00000106263 | 12.84884518 | 12.40789592 | protein_coding   | 7 | 2393721   | 2420380   | EIF3B    |
| ENSG00000106266 | 9.843820138 | 9.576507334 | protein_coding   | 7 | 2291405   | 2393953   | SNX8     |
| ENSG00000106268 | 8.324088959 | 7.985911283 | protein_coding   | 7 | 2281857   | 2290781   | NUDT1    |
| ENSG00000106278 | 0           | 0.390640832 | protein_coding   | 7 | 121513143 | 121702090 | PTPRZ1   |
| ENSG00000106290 | 9.258020218 | 8.639296529 | protein_coding   | 7 | 99704693  | 99717464  | TAF6     |
| ENSG00000106299 | 9.453532949 | 9.015499988 | protein_coding   | 7 | 123321989 | 123389121 | WASL     |
| ENSG00000106302 | 0.869158192 | 0.390640832 | protein_coding   | 7 | 123469037 | 123517532 | HYAL4    |
| ENSG00000106305 | 8.741255403 | 8.792849743 | protein_coding   | 7 | 6048876   | 6063465   | AIMP2    |
| ENSG00000106327 | 7.507990374 | 7.216390925 | protein_coding   | 7 | 100218039 | 100240402 | TFR2     |
| ENSG00000106328 | 0.869158192 |             | 0 protein_coding | 7 | 127231463 | 127242198 | FSCN3    |
| ENSG00000106330 | 7.420203928 | 7.057067116 | protein_coding   | 7 | 100209725 | 100213007 | MOSPD3   |
| ENSG00000106333 | 5.301468762 | 4.29708397  | protein_coding   | 7 | 100199800 | 100205798 | PCOLCE   |
| ENSG00000106336 | 2.928422289 | 2.652276565 | protein_coding   | 7 | 100181605 | 100198740 | FBXO24   |
| ENSG00000106344 | 9.395398058 | 9.253876247 | protein_coding   | 7 | 127950437 | 127983962 | RBM28    |
| ENSG00000106346 | 8.60394966  | 8.112884393 | protein_coding   | 7 | 6144515   | 6201195   | USP42    |
| ENSG00000106348 | 10.83228291 | 10.10734462 | protein_coding   | 7 | 128032331 | 128050306 | IMPDH1   |
| ENSG00000106351 | 8.730065371 | 7.623703032 | protein_coding   | 7 | 100136834 | 100165842 | AGFG2    |
| ENSG00000106355 | 8.387780826 | 8.664945797 | protein_coding   | 7 | 32524951  | 32534895  | LSM5     |
| ENSG00000106366 | 12.57880104 | 12.38131702 | protein_coding   | 7 | 100770370 | 100782547 | SERPINE1 |
| ENSG00000106367 | 9.819610198 | 9.535382018 | protein_coding   | 7 | 100797678 | 100804877 | AP1S1    |
| ENSG00000106384 | 0.499066092 | 0.390640832 | protein_coding   | 7 | 100838288 | 100844302 | MOGAT3   |
| ENSG00000106392 | 9.235445742 | 9.264127823 | protein_coding   | 7 | 7196565   | 7288251   | C1GALT1  |
| ENSG00000106397 | 11.04080703 | 11.14364759 | protein_coding   | 7 | 100849258 | 100861701 | PLOD3    |
| ENSG00000106399 | 8.109865782 | 8.25035614  | protein_coding   | 7 | 7676149   | 7758238   | RPA3     |
| ENSG00000106400 | 9.336667406 | 9.231660172 | protein_coding   | 7 | 100860949 | 100867471 | ZNHIT1   |
| ENSG00000106404 | 7.367016815 | 7.612284109 | protein_coding   | 7 | 100875373 | 100882101 | CLDN15   |
| ENSG00000106415 | 6.931877181 | 6.398170093 | protein_coding   | 7 | 8008425   | 8133902   | GLCC1    |
| ENSG00000106436 | 1.16343121  | 0.697730409 | protein_coding   | 7 | 101256605 | 101272576 | MYL10    |
| ENSG00000106443 | 9.047656547 | 8.906597279 | protein_coding   | 7 | 11013499  | 11209250  | PHF14    |
| ENSG00000106459 | 7.73205733  | 7.711939664 | protein_coding   | 7 | 129251555 | 129396922 | NRF1     |
| ENSG00000106460 | 8.781106853 | 9.089014348 | protein_coding   | 7 | 12250867  | 12276886  | TMEM106B |
| ENSG00000106462 | 9.049908262 | 9.424844729 | protein_coding   | 7 | 148504475 | 148581413 | EZH2     |
| ENSG00000106477 | 7.997697782 | 7.795089291 | protein_coding   | 7 | 130036375 | 130082274 | CEP41    |
| ENSG00000106479 | 8.013936171 | 7.933654619 | protein_coding   | 7 | 149535456 | 149564568 | ZNF862   |
| ENSG00000106483 | 0.869158192 | 0.697730409 | protein_coding   | 7 | 37945543  | 38065297  | SFRP4    |
| ENSG00000106484 | 6.220467583 | 3.845183986 | protein_coding   | 7 | 130126046 | 130146133 | MEST     |
| ENSG00000106524 | 7.140657543 | 6.766973175 | protein_coding   | 7 | 16639401  | 16685442  | ANKMY2   |
| ENSG00000106526 | 5.458875168 | 5.317302248 | protein_coding   | 7 | 149941005 | 150020814 | ACTR3C   |
| ENSG00000106537 | 8.890689734 | 6.919299326 | protein_coding   | 7 | 16793160  | 16824161  | TSPAN13  |
| ENSG00000106538 | 5.512107582 | 3.87606762  | protein_coding   | 7 | 150035408 | 150038763 | RARRES2  |
| ENSG00000106541 | 3.603959378 |             | 0 protein_coding | 7 | 16831435  | 16873057  | AGR2     |
| ENSG00000106546 | 11.21971615 | 11.17134077 | protein_coding   | 7 | 17338246  | 17385776  | AHR      |
| ENSG00000106554 | 9.185117095 | 9.208338404 | protein_coding   | 7 | 132469629 | 132766848 | CHCHD3   |
| ENSG00000106560 | 4.962122459 | 5.283144778 | protein_coding   | 7 | 150382785 | 150390729 | GIMAP2   |
| ENSG00000106565 | 0           | 0.697730409 | protein_coding   | 7 | 150488373 | 150498450 | TMEM176B |
| ENSG00000106571 | 8.593182305 | 8.540340653 | protein_coding   | 7 | 42000548  | 42277469  | GLI3     |
| ENSG00000106588 | 6.343050432 | 6.720932357 | protein_coding   | 7 | 42956460  | 42971822  | PSMA2    |
| ENSG00000106591 | 8.732871027 | 9.269953325 | protein_coding   | 7 | 42971799  | 42988557  | MRPL32   |

|                 |             |             |                |   |           |           |          |
|-----------------|-------------|-------------|----------------|---|-----------|-----------|----------|
| ENSG00000106603 | 9.099664364 | 8.995422414 | protein_coding | 7 | 43648083  | 43769316  | C7orf44  |
| ENSG00000106605 | 8.831713317 | 8.874456566 | protein_coding | 7 | 43798279  | 43846939  | BLVRA    |
| ENSG00000106608 | 10.34841449 | 10.09303901 | protein_coding | 7 | 43915493  | 43966010  | URGCP    |
| ENSG00000106609 | 10.94455111 | 10.23083319 | protein_coding | 7 | 66386212  | 66423538  | C7orf42  |
| ENSG00000106610 | 6.804311337 | 6.628734426 | protein_coding | 7 | 66767608  | 66786513  | STAG3L4  |
| ENSG00000106615 | 9.59671396  | 9.45966896  | protein_coding | 7 | 151163098 | 151217206 | RHEB     |
| ENSG00000106617 | 8.382430368 | 8.034631177 | protein_coding | 7 | 151253210 | 151574210 | PRKAG2   |
| ENSG00000106624 | 3.554067925 | 3.232099092 | protein_coding | 7 | 44143960  | 44154161  | AEBP1    |
| ENSG00000106628 | 11.47479401 | 11.16744486 | protein_coding | 7 | 44154286  | 44163957  | POLD2    |
| ENSG00000106631 | 0.499066092 | 1.802319292 | protein_coding | 7 | 44178463  | 44180931  | MYL7     |
| ENSG00000106633 | 5.649112675 | 5.200150955 | protein_coding | 7 | 44183872  | 44237769  | GCK      |
| ENSG00000106635 | 8.915598341 | 8.624594823 | protein_coding | 7 | 72950686  | 72972332  | BCL7B    |
| ENSG00000106636 | 11.07769075 | 10.58844036 | protein_coding | 7 | 44240567  | 44253893  | YKT6     |
| ENSG00000106638 | 9.747220804 | 9.591123153 | protein_coding | 7 | 72983990  | 72993121  | TBL2     |
| ENSG00000106665 | 9.358631958 | 8.35545848  | protein_coding | 7 | 73703803  | 73820273  | CLIP2    |
| ENSG00000106682 | 12.47254858 | 11.97076348 | protein_coding | 7 | 73588575  | 73611431  | EIF4H    |
| ENSG00000106683 | 10.5575205  | 9.737577069 | protein_coding | 7 | 73497263  | 73536855  | LIMK1    |
| ENSG00000106686 | 1.616589159 | 1.16600992  | protein_coding | 9 | 4553386   | 4666674   | C9orf68  |
| ENSG00000106689 | 4.923348194 | 3.845183986 | protein_coding | 9 | 126763949 | 126795580 | LHX2     |
| ENSG00000106692 | 8.833021386 | 8.729786462 | protein_coding | 9 | 108320411 | 108403399 | FKTN     |
| ENSG00000106701 | 6.658471572 | 7.005624493 | protein_coding | 9 | 108210077 | 108314714 | FSD1L    |
| ENSG00000106714 | 4.292665995 | 3.133298822 | protein_coding | 9 | 39072764  | 39288456  | CNTNAP3  |
| ENSG00000106723 | 10.28244148 | 10.10937675 | protein_coding | 9 | 91003334  | 91093609  | SPIN1    |
| ENSG00000106733 | 7.356139979 | 7.551403417 | protein_coding | 9 | 77675489  | 77703133  | C9orf95  |
| ENSG00000106771 | 10.10648469 | 9.823270084 | protein_coding | 9 | 111777417 | 111882225 | C9orf5   |
| ENSG00000106772 | 3.911897206 | 2.420525079 | protein_coding | 9 | 79226292  | 79521003  | PRUNE2   |
| ENSG00000106780 | 7.242608348 | 6.582669759 | protein_coding | 9 | 123363091 | 123476748 | MEGF9    |
| ENSG00000106785 | 10.59578202 | 10.05263426 | protein_coding | 9 | 100831557 | 100881494 | TRIM14   |
| ENSG00000106789 | 8.447071828 | 6.690849666 | protein_coding | 9 | 100883257 | 100954922 | CORO2A   |
| ENSG00000106799 | 10.24509804 | 10.44325939 | protein_coding | 9 | 101866320 | 101916474 | TGFBF1   |
| ENSG00000106803 | 9.651121255 | 10.00190583 | protein_coding | 9 | 101984346 | 101992897 | SEC61B   |
| ENSG00000106804 | 5.785082014 | 5.691786012 | protein_coding | 9 | 123714616 | 123837452 | C5       |
| ENSG00000106809 | 1.960915222 | 2.039052734 | protein_coding | 9 | 95146249  | 95166978  | OGN      |
| ENSG00000106819 | 0.869158192 | 1.667587519 | protein_coding | 9 | 95218487  | 95244788  | ASPN     |
| ENSG00000106823 | 5.360713447 | 5.516660875 | protein_coding | 9 | 95256365  | 95298937  | ECM2     |
| ENSG00000106829 | 7.430610036 | 8.635917101 | protein_coding | 9 | 82186688  | 82341658  | TLE4     |
| ENSG00000106852 | 5.375152132 | 3.781359661 | protein_coding | 9 | 124964856 | 124991905 | LHX6     |
| ENSG00000106853 | 9.72977077  | 9.025865365 | protein_coding | 9 | 114312002 | 114362135 | PTGR1    |
| ENSG00000106868 | 7.517784241 | 7.405556541 | protein_coding | 9 | 114803065 | 114937688 | SUSD1    |
| ENSG00000106927 | 0.499066092 | 0.697730409 | protein_coding | 9 | 116822407 | 116840752 | AMBP     |
| ENSG00000106948 | 8.544507981 | 7.926295939 | protein_coding | 9 | 117096436 | 117156685 | AKNA     |
| ENSG00000106952 | 0.869158192 | 0.697730409 | protein_coding | 9 | 117656003 | 117692697 | TNFSF8   |
| ENSG00000106976 | 8.329659793 | 5.09905904  | protein_coding | 9 | 130965658 | 131017527 | DNM1     |
| ENSG00000106991 | 10.79383898 | 10.43615284 | protein_coding | 9 | 130577291 | 130617035 | ENG      |
| ENSG00000106992 | 6.005279909 | 5.03207928  | protein_coding | 9 | 130628759 | 130640022 | AK1      |
| ENSG00000106993 | 5.60078458  | 6.1803943   | protein_coding | 9 | 4679559   | 4708398   | CDC37L1  |
| ENSG00000107014 | 0.869158192 | 0.950786998 | protein_coding | 9 | 5299868   | 5304969   | RLN2     |
| ENSG00000107020 | 5.938793061 | 6.252780742 | protein_coding | 9 | 5357973   | 5437878   | C9orf46  |
| ENSG00000107021 | 9.371291863 | 9.181546152 | protein_coding | 9 | 131549483 | 131572711 | TBC1D13  |
| ENSG00000107036 | 7.621344476 | 7.807158493 | protein_coding | 9 | 5629025   | 5776557   | KIAA1432 |
| ENSG00000107077 | 6.721980839 | 6.934050347 | protein_coding | 9 | 6720863   | 7175648   | KDM4C    |
| ENSG00000107104 | 1.960915222 | 0.390640832 | protein_coding | 9 | 470291    | 746105    | KANK1    |
| ENSG00000107130 | 10.75157835 | 10.32302723 | protein_coding | 9 | 132934857 | 132999583 | NCS1     |
| ENSG00000107140 | 7.440941622 | 7.507697912 | protein_coding | 9 | 35605281  | 35610038  | TESK1    |
| ENSG00000107147 | 4.842525946 | 4.961837817 | protein_coding | 9 | 138594031 | 138684992 | KCNT1    |
| ENSG00000107159 | 7.858191159 | 8.537928553 | protein_coding | 9 | 35673853  | 35681156  | CA9      |
| ENSG00000107164 | 10.20676225 | 9.929682347 | protein_coding | 9 | 133454352 | 133513739 | FUBP3    |
| ENSG00000107165 | 0           | 0.697730409 | protein_coding | 9 | 12685439  | 12710274  | TYRP1    |
| ENSG00000107175 | 8.382430368 | 8.948064416 | protein_coding | 9 | 35732332  | 35737001  | CREB3    |
| ENSG00000107185 | 8.742648075 | 8.457255683 | protein_coding | 9 | 35749203  | 35758572  | RGP1     |
| ENSG00000107186 | 0           | 0.950786998 | protein_coding | 9 | 13105703  | 13279589  | MPDZ     |
| ENSG00000107187 | 2.10647801  | 2.652276565 | protein_coding | 9 | 139088096 | 139096955 | LHX3     |
| ENSG00000107201 | 9.06334524  | 9.637486317 | protein_coding | 9 | 32455300  | 32526322  | DDX58    |

|                 |             |             |                |    |           |           |           |
|-----------------|-------------|-------------|----------------|----|-----------|-----------|-----------|
| ENSG00000107223 | 10.5575205  | 11.1885511  | protein_coding | 9  | 139756571 | 139760738 | EDF1      |
| ENSG00000107249 | 6.84118134  | 7.096940025 | protein_coding | 9  | 3824127   | 4348392   | GLIS3     |
| ENSG00000107262 | 7.663128351 | 8.405271149 | protein_coding | 9  | 33247818  | 33264761  | BAG1      |
| ENSG00000107263 | 9.863155878 | 9.681313358 | protein_coding | 9  | 134452157 | 134615461 | RAPGEF1   |
| ENSG00000107281 | 8.284478912 | 8.945336714 | protein_coding | 9  | 139933922 | 139940655 | NPDC1     |
| ENSG00000107282 | 3.335220907 | 1.802319292 | protein_coding | 9  | 72045204  | 72287222  | APBA1     |
| ENSG00000107290 | 9.528918244 | 9.420922967 | protein_coding | 9  | 135136743 | 135230372 | SETX      |
| ENSG00000107295 | 0.499066092 | 0.390640832 | protein_coding | 9  | 17578953  | 17797127  | SH3GL2    |
| ENSG00000107317 | 2.57521082  | 2.501982735 | protein_coding | 9  | 139871956 | 139879887 | PTGDS     |
| ENSG00000107331 | 9.697100607 | 9.022418507 | protein_coding | 9  | 139901686 | 139923374 | ABCA2     |
| ENSG00000107338 | 7.824391858 | 7.720473624 | protein_coding | 9  | 37919131  | 38069210  | SHB       |
| ENSG00000107341 | 9.704980607 | 9.232406246 | protein_coding | 9  | 33817565  | 33920402  | UBE2R2    |
| ENSG00000107362 | 7.575190993 | 7.724721747 | protein_coding | 9  | 74477368  | 74525847  | FAM108B1  |
| ENSG00000107371 | 7.250461488 | 7.575124073 | protein_coding | 9  | 37766975  | 37801434  | EXOSC3    |
| ENSG00000107372 | 10.88305084 | 10.34802633 | protein_coding | 9  | 74966341  | 74980163  | ZFAND5    |
| ENSG00000107404 | 10.53599578 | 10.13513829 | protein_coding | 1  | 1270656   | 1284760   | DVL1      |
| ENSG00000107438 | 11.23488705 | 11.91782908 | protein_coding | 10 | 96997329  | 97050781  | PDLIM1    |
| ENSG00000107443 | 7.277615649 | 7.985911283 | protein_coding | 10 | 97803151  | 97820627  | CCNJ      |
| ENSG00000107485 | 0.499066092 | 0           | protein_coding | 10 | 8095567   | 8117161   | GATA3     |
| ENSG00000107518 | 0.869158192 | 2.242360793 | protein_coding | 10 | 116853124 | 117708503 | ATRNL1    |
| ENSG00000107521 | 8.904442656 | 9.280091692 | protein_coding | 10 | 100175955 | 100206709 | HPS1      |
| ENSG00000107537 | 7.666067113 | 7.832967122 | protein_coding | 10 | 13319796  | 13344412  | PHYH      |
| ENSG00000107551 | 7.140657543 | 7.598461017 | protein_coding | 10 | 45454855  | 45490172  | RASSF4    |
| ENSG00000107554 | 8.193715877 | 8.116121984 | protein_coding | 10 | 101635334 | 101769676 | DNMBP     |
| ENSG00000107560 | 7.572060955 | 7.752033772 | protein_coding | 10 | 119764427 | 119806114 | RAB11FIP2 |
| ENSG00000107562 | 0.499066092 | 0.950786998 | protein_coding | 10 | 44793038  | 44881941  | CXCL12    |
| ENSG00000107566 | 9.519199923 | 9.935650135 | protein_coding | 10 | 101909851 | 101948091 | ERLIN1    |
| ENSG00000107581 | 11.97798309 | 12.21358951 | protein_coding | 10 | 120794356 | 120840396 | EIF3A     |
| ENSG00000107593 | 0           | 0.390640832 | protein_coding | 10 | 102047903 | 102090243 | PKD2L1    |
| ENSG00000107611 | 3.652182994 | 2.912743273 | protein_coding | 10 | 16865963  | 17171830  | CUBN      |
| ENSG00000107614 | 6.059927234 | 4.872768657 | protein_coding | 10 | 17184253  | 17244053  | TRDMT1    |
| ENSG00000107618 | 0.499066092 | 0           | protein_coding | 10 | 48381487  | 48390991  | RBP3      |
| ENSG00000107625 | 9.147761519 | 8.972384393 | protein_coding | 10 | 70661034  | 70706603  | DDX50     |
| ENSG00000107643 | 8.171138658 | 8.058387721 | protein_coding | 10 | 49514698  | 49647403  | MAPK8     |
| ENSG00000107651 | 9.799008649 | 9.8994674   | protein_coding | 10 | 121652223 | 121702014 | SEC23IP   |
| ENSG00000107669 | 8.154494062 | 8.299598884 | protein_coding | 10 | 123499939 | 123688316 | ATE1      |
| ENSG00000107672 | 7.430610036 | 8.48506837  | protein_coding | 10 | 123716603 | 123734732 | NSMCE4A   |
| ENSG00000107679 | 8.150302734 | 8.875412173 | protein_coding | 10 | 124134173 | 124191867 | PLEKHA1   |
| ENSG00000107719 | 3.004694206 | 3.183544561 | protein_coding | 10 | 72238564  | 72328205  | KIAA1274  |
| ENSG00000107731 | 8.191677941 | 7.911465009 | protein_coding | 10 | 72972327  | 73062621  | UNC5B     |
| ENSG00000107736 | 3.448790144 | 3.96493948  | protein_coding | 10 | 73156691  | 73575702  | CDH23     |
| ENSG00000107738 | 7.615275323 | 7.106738413 | protein_coding | 10 | 73507316  | 73533337  | C10orf54  |
| ENSG00000107742 | 4.821592551 | 5.339632724 | protein_coding | 10 | 73818793  | 73848790  | SPOCK2    |
| ENSG00000107745 | 8.991362316 | 8.955313173 | protein_coding | 10 | 74127098  | 74385899  | MICU1     |
| ENSG00000107758 | 8.457286611 | 8.234057939 | protein_coding | 10 | 75196186  | 75255782  | PPP3CB    |
| ENSG00000107771 | 9.024943975 | 9.247985331 | protein_coding | 10 | 86088342  | 86278273  | FAM190B   |
| ENSG00000107779 | 7.751556534 | 8.199373043 | protein_coding | 10 | 88516396  | 88684945  | BMPRI1A   |
| ENSG00000107789 | 7.68357507  | 8.599368544 | protein_coding | 10 | 89264632  | 89313217  | MINPP1    |
| ENSG00000107796 | 4.962122459 | 5.393992    | protein_coding | 10 | 90694831  | 90751147  | ACTA2     |
| ENSG00000107798 | 10.37335233 | 10.58025851 | protein_coding | 10 | 90973326  | 91174382  | LIPA      |
| ENSG00000107807 | 0.499066092 | 0.697730409 | protein_coding | 10 | 102889257 | 102897545 | TLX1      |
| ENSG00000107815 | 9.261910407 | 9.381107599 | protein_coding | 10 | 102747124 | 102754158 | C10orf2   |
| ENSG00000107816 | 9.487155506 | 10.05009744 | protein_coding | 10 | 102756375 | 102767593 | LZTS2     |
| ENSG00000107819 | 10.09726068 | 10.16005582 | protein_coding | 10 | 102790991 | 102800998 | SFXN3     |
| ENSG00000107821 | 7.8607586   | 8.445721399 | protein_coding | 10 | 102820999 | 102827888 | KAZALD1   |
| ENSG00000107829 | 8.05038018  | 8.851330023 | protein_coding | 10 | 103370423 | 103455110 | FBXW4     |
| ENSG00000107831 | 0.499066092 | 1.518964905 | protein_coding | 10 | 103530081 | 103535827 | FGF8      |
| ENSG00000107833 | 9.21351713  | 9.512836742 | protein_coding | 10 | 103541082 | 103543170 | NPM3      |
| ENSG00000107854 | 9.273518431 | 9.343619007 | protein_coding | 10 | 93558069  | 93625033  | TNKS2     |
| ENSG00000107859 | 2.35979773  | 3.232099092 | protein_coding | 10 | 103989943 | 104001231 | PITX3     |
| ENSG00000107862 | 10.78406577 | 10.77102634 | protein_coding | 10 | 104005289 | 104142656 | GBF1      |
| ENSG00000107863 | 10.24509804 | 9.70408282  | protein_coding | 10 | 24872538  | 25012597  | ARHGAP21  |
| ENSG00000107864 | 5.431503808 | 4.94736961  | protein_coding | 10 | 93808399  | 94050844  | CPEB3     |

|                 |             |             |                |    |           |           |           |
|-----------------|-------------|-------------|----------------|----|-----------|-----------|-----------|
| ENSG00000107872 | 6.721980839 | 7.507697912 | protein_coding | 10 | 104178946 | 104182893 | FBXL15    |
| ENSG00000107874 | 8.746818039 | 9.326251289 | protein_coding | 10 | 104183002 | 104192418 | CUEDC2    |
| ENSG00000107882 | 8.371669553 | 8.360927302 | protein_coding | 10 | 104263744 | 104393292 | SUFU      |
| ENSG00000107890 | 7.511262389 | 8.790825214 | protein_coding | 10 | 27280843  | 27389421  | ANKRD26   |
| ENSG00000107897 | 8.016241092 | 9.418302523 | protein_coding | 10 | 27484144  | 27531068  | ACBD5     |
| ENSG00000107902 | 8.394884042 | 8.83570377  | protein_coding | 10 | 126150403 | 126306457 | LHPP      |
| ENSG00000107929 | 9.991116523 | 9.282254961 | protein_coding | 10 | 855484    | 977564    | LARP4B    |
| ENSG00000107937 | 10.14332937 | 9.83559787  | protein_coding | 10 | 1034338   | 1065876   | GTPBP4    |
| ENSG00000107938 | 7.454602977 | 7.953699568 | protein_coding | 10 | 127408084 | 127452712 | C10orf137 |
| ENSG00000107949 | 9.621905585 | 10.05094354 | protein_coding | 10 | 127512115 | 127542264 | BCCIP     |
| ENSG00000107951 | 8.693086466 | 9.314320673 | protein_coding | 10 | 30598730  | 30663377  | MTPAP     |
| ENSG00000107954 | 3.448790144 | 3.87606762  | protein_coding | 10 | 105253736 | 105352309 | NEURL     |
| ENSG00000107957 | 7.392081667 | 6.408769788 | protein_coding | 10 | 105348285 | 105615301 | SH3PXD2A  |
| ENSG00000107959 | 10.65688683 | 10.56612361 | protein_coding | 10 | 3179920   | 3215003   | PITRM1    |
| ENSG00000107960 | 7.250461488 | 6.89311646  | protein_coding | 10 | 105642300 | 105677963 | OBFC1     |
| ENSG00000107968 | 8.219950371 | 10.13991779 | protein_coding | 10 | 30722866  | 30750762  | MAP3K8    |
| ENSG00000107984 | 8.417730894 | 7.287036562 | protein_coding | 10 | 54074056  | 54077802  | DKK1      |
| ENSG00000108001 | 0.499066092 | 0           | protein_coding | 10 | 131633547 | 131762538 | EBF3      |
| ENSG00000108010 | 9.904803739 | 10.07276981 | protein_coding | 10 | 131934663 | 131982785 | GLRX3     |
| ENSG00000108021 | 10.71905012 | 10.39942117 | protein_coding | 10 | 5726801   | 5805703   | FAM208B   |
| ENSG00000108039 | 8.778393539 | 9.420922967 | protein_coding | 10 | 111624524 | 111683311 | XPNPEP1   |
| ENSG00000108055 | 10.02984629 | 10.37665477 | protein_coding | 10 | 112327449 | 112364394 | SMC3      |
| ENSG00000108061 | 8.555643385 | 8.955313173 | protein_coding | 10 | 112679301 | 112773425 | SHOC2     |
| ENSG00000108064 | 9.555310919 | 9.239845842 | protein_coding | 10 | 60144782  | 60158981  | TFAM      |
| ENSG00000108091 | 10.12902374 | 9.724908876 | protein_coding | 10 | 61548521  | 61666414  | CCDC6     |
| ENSG00000108094 | 9.30119149  | 10.26258899 | protein_coding | 10 | 35297479  | 35379570  | CUL2      |
| ENSG00000108100 | 9.662202373 | 10.33835587 | protein_coding | 10 | 35535953  | 35860852  | CCNY      |
| ENSG00000108106 | 10.20069501 | 10.05643114 | protein_coding | 19 | 55912652  | 55919325  | UBE2S     |
| ENSG00000108107 | 13.11592303 | 13.43228164 | protein_coding | 19 | 55896713  | 55914612  | RPL28     |
| ENSG00000108175 | 10.74360174 | 10.71046517 | protein_coding | 10 | 80828792  | 81076285  | ZMIZ1     |
| ENSG00000108176 | 1.616589159 | 1.667587519 | protein_coding | 10 | 69556427  | 69597924  | DNAJC12   |
| ENSG00000108179 | 10.91520975 | 10.68997129 | protein_coding | 10 | 81107225  | 81115093  | PPIF      |
| ENSG00000108187 | 4.352265886 | 4.547834947 | protein_coding | 10 | 70042417  | 70092684  | PBLD      |
| ENSG00000108219 | 9.761717462 | 9.794762494 | protein_coding | 10 | 82213922  | 82282387  | TSPAN14   |
| ENSG00000108239 | 7.030950614 | 7.758263791 | protein_coding | 10 | 96162261  | 96295687  | TBC1D12   |
| ENSG00000108242 | 0.869158192 | 1.16600992  | protein_coding | 10 | 96442710  | 96495947  | CYP2C18   |
| ENSG00000108256 | 10.69659067 | 10.15887898 | protein_coding | 17 | 27582855  | 27621166  | NUFIP2    |
| ENSG00000108262 | 10.18848346 | 9.651500164 | protein_coding | 17 | 27900487  | 27916645  | GIT1      |
| ENSG00000108264 | 7.161632221 | 6.95589788  | protein_coding | 17 | 35766965  | 35838372  | TADA2A    |
| ENSG00000108270 | 10.16166506 | 9.969158297 | protein_coding | 17 | 35306175  | 35414170  | AATF      |
| ENSG00000108272 | 6.567100227 | 6.281901708 | protein_coding | 17 | 34948329  | 34957235  | DHRS11    |
| ENSG00000108278 | 7.413224588 | 7.747865429 | protein_coding | 17 | 34842479  | 34851667  | ZNHIT3    |
| ENSG00000108292 | 10.74046841 | 10.44261478 | protein_coding | 17 | 36861795  | 36886056  | MLLT6     |
| ENSG00000108294 | 9.76309053  | 9.955215698 | protein_coding | 17 | 36909003  | 36920483  | PSMB3     |
| ENSG00000108296 | 7.795160661 | 7.789016615 | protein_coding | 17 | 36957447  | 36981589  | CWC25     |
| ENSG00000108298 | 12.44019009 | 12.83249443 | protein_coding | 17 | 37356536  | 37360980  | RPL19     |
| ENSG00000108306 | 7.911170638 | 7.705505903 | protein_coding | 17 | 37408897  | 37557898  | FBXL20    |
| ENSG00000108309 | 1.799000381 | 2.144285137 | protein_coding | 17 | 42385943  | 42396039  | RUNDC3A   |
| ENSG00000108312 | 10.3787365  | 10.39642851 | protein_coding | 17 | 42282401  | 42298994  | UBTF      |
| ENSG00000108342 | 7.488200893 | 6.009862691 | protein_coding | 17 | 38171614  | 38174066  | CSF3      |
| ENSG00000108344 | 11.23958002 | 10.83628127 | protein_coding | 17 | 38137050  | 38154213  | PSMD3     |
| ENSG00000108349 | 9.795658092 | 9.666483771 | protein_coding | 17 | 38296507  | 38328431  | CASC3     |
| ENSG00000108352 | 7.46813618  | 6.866449614 | protein_coding | 17 | 38333263  | 38351906  | RAPGEFL1  |
| ENSG00000108370 | 3.448790144 | 4.226940739 | protein_coding | 17 | 63133456  | 63223819  | RG59      |
| ENSG00000108375 | 7.262161623 | 7.167295693 | protein_coding | 17 | 56429861  | 56494480  | RNF43     |
| ENSG00000108379 | 4.517578978 | 4.744751758 | protein_coding | 17 | 44841694  | 44896082  | WNT3      |
| ENSG00000108381 | 0.499066092 | 0           | protein_coding | 17 | 3377404   | 3406713   | ASPA      |
| ENSG00000108384 | 7.593829938 | 8.166959047 | protein_coding | 17 | 56769934  | 56811703  | RAD51C    |
| ENSG00000108387 | 3.077135474 | 2.912743273 | protein_coding | 17 | 56597616  | 56618062  | 4-sep     |
| ENSG00000108389 | 9.599791022 | 9.638612448 | protein_coding | 17 | 56566893  | 56595251  | MTMR4     |
| ENSG00000108395 | 9.544971367 | 9.768254884 | protein_coding | 17 | 57060002  | 57184266  | TRIM37    |
| ENSG00000108405 | 0.499066092 | 0.390640832 | protein_coding | 17 | 3799891   | 3819960   | P2RX1     |
| ENSG00000108406 | 9.524067267 | 9.793751926 | protein_coding | 17 | 57642886  | 57685712  | DHX40     |

|                 |             |             |                  |    |          |          |           |
|-----------------|-------------|-------------|------------------|----|----------|----------|-----------|
| ENSG00000108423 | 7.471499737 | 7.549009758 | protein_coding   | 17 | 57936851 | 57970296 | TUBD1     |
| ENSG00000108424 | 12.24690755 | 11.97967783 | protein_coding   | 17 | 45726842 | 45760998 | KPNB1     |
| ENSG00000108433 | 7.962273293 | 8.060069742 | protein_coding   | 17 | 45000486 | 45105003 | GOSR2     |
| ENSG00000108439 | 8.801295662 | 8.576046394 | protein_coding   | 17 | 46018889 | 46026673 | PNPO      |
| ENSG00000108442 | 0           | 0.390640832 | pseudogene       | 2  | 74855455 | 74856069 | FAM18B4P  |
| ENSG00000108443 | 8.787867896 | 8.803934152 | protein_coding   | 17 | 57970447 | 58027925 | RPS6KB1   |
| ENSG00000108448 | 8.337054268 | 7.960920138 | protein_coding   | 17 | 18601311 | 18639432 | TRIM16L   |
| ENSG00000108452 | 0           | 0.950786998 | pseudogene       | 17 | 15578790 | 15578957 | ZNF29P    |
| ENSG00000108465 | 9.28407769  | 9.57591961  | protein_coding   | 17 | 46047900 | 46059147 | CDK5RAP3  |
| ENSG00000108468 | 9.765147683 | 9.843432726 | protein_coding   | 17 | 46147414 | 46178883 | CBX1      |
| ENSG00000108469 | 8.525216449 | 8.652735634 | protein_coding   | 17 | 73622925 | 73663269 | RECQL5    |
| ENSG00000108474 | 7.153278907 | 7.971683681 | protein_coding   | 17 | 16120524 | 16229573 | PIGL      |
| ENSG00000108479 | 8.101206377 | 8.371803145 | protein_coding   | 17 | 73754018 | 73761307 | GALK1     |
| ENSG00000108506 | 8.068262669 | 8.202422444 | protein_coding   | 17 | 59942728 | 60005377 | INTS2     |
| ENSG00000108509 | 9.87399885  | 10.354209   | protein_coding   | 17 | 4871287  | 4890960  | CAMTA2    |
| ENSG00000108510 | 9.828818559 | 9.902283133 | protein_coding   | 17 | 60019967 | 60142643 | MED13     |
| ENSG00000108511 | 0.869158192 | 0.697730409 | protein_coding   | 17 | 46671639 | 46682354 | HOXB6     |
| ENSG00000108515 | 6.129712275 | 7.444711851 | protein_coding   | 17 | 4851387  | 4860426  | ENO3      |
| ENSG00000108518 | 13.00880848 | 13.78229465 | protein_coding   | 17 | 4848947  | 4852309  | PFN1      |
| ENSG00000108523 | 10.33877788 | 10.93330827 | protein_coding   | 17 | 4843423  | 4848518  | RNF167    |
| ENSG00000108528 | 9.47296155  | 9.933357752 | protein_coding   | 17 | 4840425  | 4843463  | SLC25A11  |
| ENSG00000108551 | 6.96088487  | 5.32851069  | protein_coding   | 17 | 17397751 | 17399707 | RASD1     |
| ENSG00000108556 | 3.211941663 | 3.813624741 | protein_coding   | 17 | 4801069  | 4806369  | CHRNE     |
| ENSG00000108557 | 10.42890818 | 10.70321774 | protein_coding   | 17 | 17584787 | 17714767 | RAI1      |
| ENSG00000108559 | 10.1653044  | 10.4939164  | protein_coding   | 17 | 5289346  | 5323000  | NUP88     |
| ENSG00000108561 | 10.94757346 | 11.63019492 | protein_coding   | 17 | 5336099  | 5342471  | C1QBP     |
| ENSG00000108576 | 1.16343121  | 0.950786998 | protein_coding   | 17 | 28521337 | 28562954 | SLC6A4    |
| ENSG00000108578 | 9.308732943 | 9.028445114 | protein_coding   | 17 | 28575223 | 28619074 | BLMH      |
| ENSG00000108582 | 11.03513541 | 10.84703819 | protein_coding   | 17 | 28705942 | 28796730 | CPD       |
| ENSG00000108587 | 8.472474444 | 8.286726732 | protein_coding   | 17 | 28804426 | 28853837 | GOSR1     |
| ENSG00000108588 | 10.39963312 | 10.66725214 | protein_coding   | 17 | 61822611 | 61851088 | CCDC47    |
| ENSG00000108590 | 5.239686603 | 6.27612435  | protein_coding   | 17 | 6546635  | 6554954  | MED31     |
| ENSG00000108591 | 9.608219258 | 10.02361908 | protein_coding   | 17 | 17991239 | 18011285 | DRG2      |
| ENSG00000108592 | 10.15069164 | 10.21544416 | protein_coding   | 17 | 61896795 | 61905031 | FTSJ3     |
| ENSG00000108599 | 8.528449672 | 9.002437654 | protein_coding   | 17 | 19807788 | 19881150 | AKAP10    |
| ENSG00000108602 | 0           | 0.390640832 | protein_coding   | 17 | 19641297 | 19651746 | ALDH3A1   |
| ENSG00000108604 | 10.33647394 | 10.28505673 | protein_coding   | 17 | 61909441 | 61920351 | SMARCD2   |
| ENSG00000108622 | 5.660945913 | 3.570966319 | protein_coding   | 17 | 62079956 | 62097994 | ICAM2     |
| ENSG00000108639 | 9.450127191 | 9.453283127 | protein_coding   | 17 | 76164671 | 76169009 | SYNGR2    |
| ENSG00000108641 | 7.549958459 | 8.387964709 | protein_coding   | 17 | 19244550 | 19281469 | B9D1      |
| ENSG00000108651 | 9.371291863 | 9.317839931 | protein_coding   | 17 | 30187923 | 30228731 | UTP6      |
| ENSG00000108654 | 12.34070362 | 12.44054631 | protein_coding   | 17 | 62494374 | 62502484 | DDX5      |
| ENSG00000108666 | 7.093410923 | 6.97385478  | protein_coding   | 17 | 30658392 | 30669189 | C17orf75  |
| ENSG00000108669 | 8.189637121 | 8.171634445 | protein_coding   | 17 | 76670130 | 76778379 | CYTH1     |
| ENSG00000108671 | 11.09032576 | 10.56789807 | protein_coding   | 17 | 30771502 | 30809398 | PSMD11    |
| ENSG00000108679 | 12.5445785  | 12.94924282 | protein_coding   | 17 | 76967338 | 76976061 | LGALS3BP  |
| ENSG00000108688 | 0           | 0.390640832 | protein_coding   | 17 | 32597240 | 32599261 | CCL7      |
| ENSG00000108691 | 10.47320504 | 11.60434694 | protein_coding   | 17 | 32582313 | 32584222 | CCL2      |
| ENSG00000108700 | 0           | 0.390640832 | protein_coding   | 17 | 32646055 | 32648421 | CCL8      |
| ENSG00000108733 | 5.752272083 | 5.953060722 | protein_coding   | 17 | 33897849 | 33905656 | PEX12     |
| ENSG00000108753 | 0           | 0.390640832 | protein_coding   | 17 | 36046434 | 36105237 | HNF1B     |
| ENSG00000108759 | 1.407729925 | 0.697730409 | protein_coding   | 17 | 39616063 | 39623681 | KRT32     |
| ENSG00000108771 | 7.210761201 | 7.996490656 | protein_coding   | 17 | 40253422 | 40264751 | DHX58     |
| ENSG00000108773 | 9.886651823 | 10.33071191 | protein_coding   | 17 | 40265126 | 40273376 | KAT2A     |
| ENSG00000108774 | 10.52995925 | 10.5557289  | protein_coding   | 17 | 40276994 | 40307035 | RAB5C     |
| ENSG00000108784 | 8.448779323 | 8.771449152 | protein_coding   | 17 | 40687951 | 40696464 | NAGLU     |
| ENSG00000108785 | 2.471521042 | 1.518964905 | protein_coding   | 17 | 40698771 | 40699464 | HSD17B1P1 |
| ENSG00000108786 | 7.04456449  | 6.568558581 | protein_coding   | 17 | 40703984 | 40707857 | HSD17B1   |
| ENSG00000108788 | 8.422952257 | 8.117738058 | protein_coding   | 17 | 40719078 | 40725220 | MLX       |
| ENSG00000108797 | 9.290757201 | 9.80181672  | protein_coding   | 17 | 40834632 | 40852010 | CNTNAP1   |
| ENSG00000108799 | 8.150302734 | 8.678149164 | protein_coding   | 17 | 40852294 | 40897071 | EZH1      |
| ENSG00000108813 | 5.141750194 | 4.676215056 | protein_coding   | 17 | 48046334 | 48052321 | DLX4      |
| ENSG00000108819 | 10.12154978 | 9.554003775 | processed_transc | 17 | 48211104 | 48227991 | PPP1R9B   |

|                 |             |             |                |    |           |           |          |
|-----------------|-------------|-------------|----------------|----|-----------|-----------|----------|
| ENSG00000108821 | 12.2631316  | 10.99242021 | protein_coding | 17 | 48260650  | 48278993  | COL1A1   |
| ENSG00000108823 | 1.407729925 | 0.390640832 | protein_coding | 17 | 48241575  | 48253292  | SGCA     |
| ENSG00000108825 | 8.362640485 | 8.634788863 | protein_coding | 17 | 41102543  | 41132545  | AARSD1   |
| ENSG00000108826 | 7.96466218  | 8.291030223 | protein_coding | 17 | 48445218  | 48450575  | MRPL27   |
| ENSG00000108828 | 11.61521956 | 11.29647904 | protein_coding | 17 | 41166622  | 41174459  | VAT1     |
| ENSG00000108829 | 11.82894007 | 11.32071108 | protein_coding | 17 | 48458599  | 48474914  | LRRCS9   |
| ENSG00000108830 | 3.274897671 | 2.721932731 | protein_coding | 17 | 41177258  | 41184057  | RND2     |
| ENSG00000108839 | 5.637181576 | 6.866449614 | protein_coding | 17 | 6899384   | 6914055   | ALOX12   |
| ENSG00000108840 | 8.53006357  | 7.834933409 | protein_coding | 17 | 42154121  | 42201014  | HDAC5    |
| ENSG00000108846 | 9.876538338 | 9.400488931 | protein_coding | 17 | 48712138  | 48769063  | ABCC3    |
| ENSG00000108848 | 9.4441477   | 9.657623394 | protein_coding | 17 | 48796905  | 48834076  | LUC7L3   |
| ENSG00000108852 | 6.820228284 | 6.398170093 | protein_coding | 17 | 41952725  | 41987068  | MPP2     |
| ENSG00000108854 | 9.009986712 | 9.304420832 | protein_coding | 17 | 62540735  | 62658386  | SMURF2   |
| ENSG00000108861 | 9.761717462 | 9.906496457 | protein_coding | 17 | 41843490  | 41856368  | DUSP3    |
| ENSG00000108878 | 0           | 0.390640832 | protein_coding | 17 | 65040706  | 65052913  | CACNG1   |
| ENSG00000108883 | 11.21244741 | 11.08310221 | protein_coding | 17 | 42927655  | 42976993  | EFTUD2   |
| ENSG00000108924 | 1.799000381 | 1.16600992  | protein_coding | 17 | 53342321  | 53402426  | HLF      |
| ENSG00000108932 | 5.018397273 | 5.593003837 | protein_coding | 17 | 66263167  | 66287405  | SLC16A6  |
| ENSG00000108946 | 10.54320643 | 10.64669035 | protein_coding | 17 | 66508110  | 66528908  | PRKAR1A  |
| ENSG00000108947 | 5.107569429 | 6.117167886 | protein_coding | 17 | 7608520   | 7614696   | EFNB3    |
| ENSG00000108950 | 2.57521082  | 3.493416095 | protein_coding | 17 | 66531258  | 66597095  | FAM20A   |
| ENSG00000108953 | 13.07836245 | 13.28314478 | protein_coding | 17 | 1247566   | 1303505   | YWHAE    |
| ENSG00000108958 | 1.16343121  | 1.353254395 | pseudogene     | 17 | 1761333   | 1761740   |          |
| ENSG00000108960 | 8.403714162 | 7.718344862 | protein_coding | 17 | 53469974  | 53499341  | MMD      |
| ENSG00000108961 | 5.107569429 | 5.808454063 | protein_coding | 17 | 8191969   | 8193409   | RANGRF   |
| ENSG00000108963 | 9.034071956 | 9.591123153 | protein_coding | 17 | 1933431   | 1946724   | DPH1     |
| ENSG00000109016 | 7.757079669 | 8.714915547 | protein_coding | 17 | 21030258  | 21094836  | DHRS7B   |
| ENSG00000109046 | 9.283120944 | 9.120790981 | protein_coding | 17 | 25621106  | 25640657  | WSB1     |
| ENSG00000109061 | 0           | 0.390640832 | protein_coding | 17 | 10395624  | 10421860  | MYH1     |
| ENSG00000109062 | 10.07642654 | 9.674741242 | protein_coding | 17 | 72744763  | 72765498  | SLC9A3R1 |
| ENSG00000109063 | 5.827699195 | 6.850987146 | protein_coding | 17 | 10531844  | 10559465  | MYH3     |
| ENSG00000109065 | 8.324088959 | 8.770422115 | protein_coding | 17 | 72766688  | 72772470  | NAT9     |
| ENSG00000109066 | 8.391336806 | 8.570156468 | protein_coding | 17 | 72772622  | 72835918  | TMEM104  |
| ENSG00000109079 | 10.04403543 | 9.800308001 | protein_coding | 17 | 26662730  | 26674035  | TNFAIP1  |
| ENSG00000109083 | 6.922076877 | 7.234379288 | protein_coding | 17 | 26655353  | 26662495  | IFT20    |
| ENSG00000109084 | 9.633963159 | 8.875412173 | protein_coding | 17 | 26646161  | 26655711  | TMEM97   |
| ENSG00000109089 | 9.493786999 | 9.50483104  | protein_coding | 17 | 72983727  | 73001895  | CDR2L    |
| ENSG00000109099 | 8.641761486 | 9.722786654 | protein_coding | 17 | 15133095  | 15168643  | PMP22    |
| ENSG00000109103 | 8.116326397 | 8.398639372 | protein_coding | 17 | 26873725  | 26879659  | UNC119   |
| ENSG00000109107 | 9.556895063 | 8.814934048 | protein_coding | 17 | 26900133  | 26903952  | ALDOC    |
| ENSG00000109111 | 10.98541646 | 10.65283399 | protein_coding | 17 | 26989302  | 27029248  | SUPT6H   |
| ENSG00000109113 | 10.53479049 | 10.50291056 | protein_coding | 17 | 27041299  | 27045447  | RAB34    |
| ENSG00000109118 | 9.43383913  | 8.76733661  | protein_coding | 17 | 27232268  | 27278789  | PHF12    |
| ENSG00000109133 | 9.540174158 | 9.267043514 | protein_coding | 4  | 41937137  | 41962589  | TMEM33   |
| ENSG00000109163 | 1.16343121  | 1.518964905 | protein_coding | 4  | 68605046  | 68620078  | GNRHR    |
| ENSG00000109171 | 9.263851576 | 9.169909673 | protein_coding | 4  | 48343339  | 48428076  | SLAIN2   |
| ENSG00000109180 | 9.252165193 | 9.480543884 | protein_coding | 4  | 48807229  | 48863834  | OCIAD1   |
| ENSG00000109184 | 8.458982065 | 8.724493    | protein_coding | 4  | 52709166  | 52783003  | DCUN1D4  |
| ENSG00000109189 | 6.989320791 | 7.340609974 | protein_coding | 4  | 53460340  | 53525502  | USP46    |
| ENSG00000109193 | 0           | 0.390640832 | protein_coding | 4  | 70676498  | 70725870  | SULT1E1  |
| ENSG00000109205 | 0           | 0.950786998 | protein_coding | 4  | 71062213  | 71070293  | ODAM     |
| ENSG00000109220 | 6.541724534 | 6.866449614 | protein_coding | 4  | 54875956  | 54930857  | CHIC2    |
| ENSG00000109255 | 3.211941663 | 1.16600992  | protein_coding | 4  | 56461396  | 56502865  | NMU      |
| ENSG00000109265 | 4.261916566 | 6.002883551 | protein_coding | 4  | 57036361  | 57194791  | KIAA1211 |
| ENSG00000109270 | 7.413224588 | 7.881337775 | protein_coding | 4  | 100799493 | 100815647 | LAMTOR3  |
| ENSG00000109272 | 0.499066092 | 1.16600992  | protein_coding | 4  | 74718906  | 74719872  | PF4V1    |
| ENSG00000109320 | 10.20221422 | 10.70885777 | protein_coding | 4  | 103422486 | 103538459 | NFKB1    |
| ENSG00000109321 | 3.554067925 | 0           | protein_coding | 4  | 75310851  | 75320726  | AREG     |
| ENSG00000109323 | 7.546773135 | 8.385283657 | protein_coding | 4  | 103552660 | 103682151 | MANBA    |
| ENSG00000109332 | 10.63605558 | 10.88478007 | protein_coding | 4  | 103715540 | 103790053 | UBE2D3   |
| ENSG00000109339 | 2.10647801  | 2.039052734 | protein_coding | 4  | 86936276  | 87515284  | MAPK10   |
| ENSG00000109381 | 7.883662252 | 7.953699568 | protein_coding | 4  | 139949266 | 140098372 | ELF2     |
| ENSG00000109390 | 7.537174746 | 7.971683681 | protein_coding | 4  | 140188034 | 140223705 | NDUFC1   |

|                 |             |             |                |    |           |           |          |
|-----------------|-------------|-------------|----------------|----|-----------|-----------|----------|
| ENSG00000109436 | 9.150911694 | 9.212125573 | protein_coding | 4  | 141541919 | 141677274 | TBC1D9   |
| ENSG00000109445 | 8.16075831  | 8.405271149 | protein_coding | 4  | 142142041 | 142155851 | ZNF330   |
| ENSG00000109452 | 7.734859118 | 7.340609974 | protein_coding | 4  | 142944313 | 143768585 | INPP4B   |
| ENSG00000109458 | 6.290697143 | 6.980975423 | protein_coding | 4  | 144257915 | 144395721 | GAB1     |
| ENSG00000109466 | 7.066972635 | 6.82352253  | protein_coding | 4  | 166128770 | 166244308 | KLHL2    |
| ENSG00000109472 | 7.273767634 | 9.042126408 | protein_coding | 4  | 166282346 | 166419472 | CPE      |
| ENSG00000109475 | 10.04403543 | 10.96933381 | protein_coding | 4  | 109541722 | 109551568 | RPL34    |
| ENSG00000109501 | 9.58976648  | 9.843920995 | protein_coding | 4  | 6271576   | 6304992   | WFS1     |
| ENSG00000109511 | 0.869158192 | 1.353254395 | protein_coding | 4  | 169013666 | 169108893 | ANXA10   |
| ENSG00000109519 | 9.379372099 | 9.403141901 | protein_coding | 4  | 7060633   | 7069924   | GRPEL1   |
| ENSG00000109534 | 7.981274537 | 8.088368066 | protein_coding | 4  | 110736666 | 110745893 | GAR1     |
| ENSG00000109536 | 7.277615649 | 8.112884393 | protein_coding | 4  | 190861943 | 190884359 | FRG1     |
| ENSG00000109572 | 9.789607412 | 10.35523688 | protein_coding | 4  | 170533784 | 170644824 | CLCN3    |
| ENSG00000109576 | 6.050961887 | 6.815578497 | protein_coding | 4  | 170981373 | 171012850 | AADAT    |
| ENSG00000109586 | 9.124447632 | 9.432656416 | protein_coding | 4  | 174089904 | 174245118 | GALNT7   |
| ENSG00000109606 | 10.70661584 | 10.64697018 | protein_coding | 4  | 24519064  | 24586173  | DHX15    |
| ENSG00000109610 | 3.448790144 | 2.971122874 | protein_coding | 4  | 24797085  | 24802464  | SOD3     |
| ENSG00000109618 | 6.573375019 | 6.926693689 | protein_coding | 4  | 25121627  | 25162204  | SEPSECS  |
| ENSG00000109625 | 3.077135474 | 1.925536307 | protein_coding | 4  | 8594387   | 8621488   | CPZ      |
| ENSG00000109654 | 7.488200893 | 7.996490656 | protein_coding | 4  | 154073494 | 154260472 | TRIM2    |
| ENSG00000109667 | 2.847891871 | 1.16600992  | protein_coding | 4  | 9772777   | 10056560  | SLC2A9   |
| ENSG00000109670 | 7.698004462 | 7.907733332 | protein_coding | 4  | 153242410 | 153456172 | FBXW7    |
| ENSG00000109674 | 7.017207048 | 7.4317778   | protein_coding | 4  | 178230990 | 178284097 | NEIL3    |
| ENSG00000109680 | 4.923348194 | 5.339632724 | protein_coding | 4  | 26578059  | 26756973  | TBC1D19  |
| ENSG00000109684 | 0           | 0.390640832 | protein_coding | 4  | 10488019  | 10686489  | CLNK     |
| ENSG00000109685 | 11.20842134 | 10.91715822 | protein_coding | 4  | 1873151   | 1983934   | WHSC1    |
| ENSG00000109686 | 9.816968406 | 10.29044031 | protein_coding | 4  | 152041431 | 152149182 | SH3D19   |
| ENSG00000109689 | 7.581430769 | 7.832967122 | protein_coding | 4  | 26859300  | 27027003  | STM2     |
| ENSG00000109705 | 2.238690726 | 1.802319292 | protein_coding | 4  | 13542454  | 13546674  | NKX3-2   |
| ENSG00000109736 | 9.365879787 | 9.376390077 | protein_coding | 4  | 2932288   | 2936586   | MFSD10   |
| ENSG00000109738 | 1.407729925 | 5.759604001 | protein_coding | 4  | 157997209 | 158093242 | GLRB     |
| ENSG00000109743 | 2.671945279 | 5.57429348  | protein_coding | 4  | 15704573  | 15739936  | BST1     |
| ENSG00000109756 | 7.765324926 | 8.211532164 | protein_coding | 4  | 160025330 | 160281321 | RAPGEF2  |
| ENSG00000109758 | 2.35979773  | 3.027231696 | protein_coding | 4  | 3443614   | 3451211   | HGFAC    |
| ENSG00000109762 | 6.922076877 | 7.560938532 | protein_coding | 4  | 186125391 | 186291339 | SNX25    |
| ENSG00000109771 | 4.381167248 | 5.306006045 | protein_coding | 4  | 186285032 | 186317053 | LRP2BP   |
| ENSG00000109775 | 7.556308086 | 7.85445027  | protein_coding | 4  | 186320694 | 186347139 | UFSP2    |
| ENSG00000109787 | 9.029515185 | 8.159132889 | protein_coding | 4  | 38665817  | 38702663  | KLF3     |
| ENSG00000109790 | 9.887911038 | 10.1101888  | protein_coding | 4  | 39046451  | 39128477  | KLHL5    |
| ENSG00000109794 | 1.407729925 | 1.518964905 | protein_coding | 4  | 187025573 | 187093821 | FAM149A  |
| ENSG00000109805 | 9.102921211 | 9.568257332 | protein_coding | 4  | 17812525  | 17846485  | NCAPG    |
| ENSG00000109814 | 9.604394344 | 9.103767504 | protein_coding | 4  | 39500375  | 39529931  | UGDH     |
| ENSG00000109819 | 0.869158192 | 0.697730409 | protein_coding | 4  | 23756664  | 23905712  | PPARGC1A |
| ENSG00000109832 | 0.499066092 | 0.390640832 | protein_coding | 11 | 125773271 | 125793158 | DDX25    |
| ENSG00000109846 | 1.407729925 | 2.242360793 | protein_coding | 11 | 111779289 | 111794446 | CRYAB    |
| ENSG00000109854 | 9.671006391 | 9.275755399 | protein_coding | 11 | 20385231  | 20405329  | HTATIP2  |
| ENSG00000109861 | 10.96706591 | 10.9490526  | protein_coding | 11 | 88026773  | 88070955  | CTSC     |
| ENSG00000109881 | 7.374222747 | 7.714077892 | protein_coding | 11 | 27352374  | 27385415  | CCDC34   |
| ENSG00000109911 | 7.292905885 | 7.326703453 | protein_coding | 11 | 31531297  | 31805546  | ELP4     |
| ENSG00000109917 | 9.388297379 | 9.483680566 | protein_coding | 11 | 116648436 | 116658766 | ZNF259   |
| ENSG00000109919 | 10.27668493 | 10.73883367 | protein_coding | 11 | 47638867  | 47664175  | MTCH2    |
| ENSG00000109920 | 6.992063559 | 10.13234293 | protein_coding | 11 | 47738072  | 47788995  | FNBP4    |
| ENSG00000109927 | 3.448790144 | 3.532712221 | protein_coding | 11 | 120971882 | 121062202 | TECTA    |
| ENSG00000109929 | 8.528449672 | 8.439273392 | protein_coding | 11 | 121163162 | 121179403 | SC5DL    |
| ENSG00000109944 | 5.124761037 | 4.903073497 | protein_coding | 11 | 122753391 | 122830506 | C11orf63 |
| ENSG00000109956 | 1.16343121  | 0.950786998 | protein_coding | 11 | 134248398 | 134281812 | B3GAT1   |
| ENSG00000109971 | 13.63994066 | 13.70259499 | protein_coding | 11 | 122928197 | 122933938 | HSPA8    |
| ENSG00000109991 | 1.799000381 | 1.518964905 | protein_coding | 11 | 57105848  | 57138073  | P2RX3    |
| ENSG00000110002 | 5.795854912 | 7.148445524 | protein_coding | 11 | 123986069 | 124018428 | VWA5A    |
| ENSG00000110011 | 7.356139979 | 7.402908012 | protein_coding | 11 | 63997750  | 64001758  | DNAJC4   |
| ENSG00000110013 | 7.921045056 | 8.439273392 | protein_coding | 11 | 124503009 | 124565603 | SIAE     |
| ENSG00000110025 | 8.039090007 | 8.312357201 | protein_coding | 11 | 64781654  | 64808044  | SNX15    |
| ENSG00000110031 | 5.458875168 | 5.776071827 | protein_coding | 11 | 58294344  | 58345693  | LPXN     |

|                 |             |             |                  |    |           |           |          |
|-----------------|-------------|-------------|------------------|----|-----------|-----------|----------|
| ENSG00000110042 | 8.143992822 | 5.878761167 | protein_coding   | 11 | 58938903  | 58976060  | DTX4     |
| ENSG00000110046 | 10.06311141 | 10.27748581 | protein_coding   | 11 | 64662007  | 64684722  | ATG2A    |
| ENSG00000110047 | 10.63155234 | 10.19874442 | protein_coding   | 11 | 64619114  | 64655768  | EHD1     |
| ENSG00000110048 | 10.38543857 | 10.30114757 | protein_coding   | 11 | 59341871  | 59383617  | OSBP     |
| ENSG00000110057 | 9.27062517  | 8.804937616 | protein_coding   | 11 | 67758575  | 67772452  | UNC93B1  |
| ENSG00000110060 | 7.132181536 | 7.173524745 | protein_coding   | 11 | 125763381 | 125773116 | PUS3     |
| ENSG00000110063 | 8.357195795 | 8.440565301 | protein_coding   | 11 | 126173647 | 126215644 | DCPS     |
| ENSG00000110066 | 8.996041004 | 9.049765501 | protein_coding   | 11 | 67922330  | 67981295  | SUV420H1 |
| ENSG00000110074 | 9.304967144 | 9.616492755 | protein_coding   | 11 | 126138950 | 126148026 | FOXRED1  |
| ENSG00000110075 | 10.89562502 | 10.70885777 | protein_coding   | 11 | 68228186  | 68382802  | PPP6R3   |
| ENSG00000110076 | 0.869158192 | 1.802319292 | protein_coding   | 11 | 64373646  | 64490660  | NRXN2    |
| ENSG00000110080 | 8.088119026 | 8.093304774 | protein_coding   | 11 | 126225535 | 126310239 | ST3GAL4  |
| ENSG00000110090 | 9.794315688 | 8.166959047 | protein_coding   | 11 | 68522088  | 68611878  | CPT1A    |
| ENSG00000110092 | 11.93355396 | 11.1042471  | protein_coding   | 11 | 69455855  | 69469242  | CCND1    |
| ENSG00000110104 | 9.544172939 | 9.378413761 | protein_coding   | 11 | 60609544  | 60618554  | CCDC86   |
| ENSG00000110107 | 11.31219382 | 11.33119682 | protein_coding   | 11 | 60658202  | 60674060  | PRPF19   |
| ENSG00000110108 | 11.0257282  | 11.40353163 | protein_coding   | 11 | 60681346  | 60690915  | TMEM109  |
| ENSG00000110169 | 1.960915222 | 3.133298822 | protein_coding   | 11 | 6452279   | 6463847   | HPX      |
| ENSG00000110171 | 7.106450572 | 7.541804862 | protein_coding   | 11 | 6469843   | 6495689   | TRIM3    |
| ENSG00000110172 | 9.001868107 | 9.247985331 | protein_coding   | 11 | 89934328  | 89956532  | CHORDC1  |
| ENSG00000110195 | 0.869158192 | 0.390640832 | protein_coding   | 11 | 71900602  | 71907345  | FOLR1    |
| ENSG00000110200 | 6.469548347 | 6.628734426 | protein_coding   | 11 | 71817424  | 71823826  | C11orf51 |
| ENSG00000110203 | 0           | 0.390640832 | protein_coding   | 11 | 71825915  | 71850936  | FOLR3    |
| ENSG00000110218 | 9.095310434 | 9.261937181 | protein_coding   | 11 | 93862094  | 93915138  | PANX1    |
| ENSG00000110237 | 9.335744919 | 9.511607983 | protein_coding   | 11 | 73019334  | 73080136  | ARHGEF17 |
| ENSG00000110274 | 9.576551475 | 9.566483319 | protein_coding   | 11 | 117185273 | 117283984 | CEP164   |
| ENSG00000110315 | 7.855619141 | 8.308116953 | protein_coding   | 11 | 10533225  | 10562777  | RNF141   |
| ENSG00000110318 | 6.112579918 | 5.953060722 | protein_coding   | 11 | 101785746 | 101871789 | KIAA1377 |
| ENSG00000110321 | 13.18778473 | 12.88088067 | protein_coding   | 11 | 10818597  | 10830657  | EIF4G2   |
| ENSG00000110324 | 1.960915222 | 3.368666104 | protein_coding   | 11 | 117857063 | 117872196 | IL10RA   |
| ENSG00000110328 | 8.946141254 | 8.857146507 | protein_coding   | 11 | 11292423  | 11643552  | GALNTL4  |
| ENSG00000110330 | 9.62945337  | 10.37361447 | protein_coding   | 11 | 102217942 | 102249401 | BIRC2    |
| ENSG00000110344 | 9.185117095 | 9.081580806 | protein_coding   | 11 | 118230300 | 118269926 | UBE4A    |
| ENSG00000110347 | 0           | 0.390640832 | processed_transc | 11 | 102733467 | 102745764 | MMP12    |
| ENSG00000110367 | 9.92641136  | 9.703544845 | protein_coding   | 11 | 118620034 | 118661858 | DDX6     |
| ENSG00000110375 | 3.004694206 | 3.027231696 | protein_coding   | 11 | 118795873 | 118829269 | UPK2     |
| ENSG00000110395 | 9.574206797 | 9.215902826 | protein_coding   | 11 | 119076752 | 119177651 | CBL      |
| ENSG00000110400 | 11.32967441 | 9.678031042 | protein_coding   | 11 | 119494120 | 119599794 | PVRL1    |
| ENSG00000110422 | 8.953376332 | 8.784734524 | protein_coding   | 11 | 33278218  | 33378569  | HIPK3    |
| ENSG00000110427 | 3.448790144 | 1.518964905 | protein_coding   | 11 | 33563618  | 33695648  | C11orf41 |
| ENSG00000110429 | 8.154494062 | 8.247406493 | protein_coding   | 11 | 33762485  | 33796089  | FBXO3    |
| ENSG00000110435 | 8.611591722 | 9.127223641 | protein_coding   | 11 | 34937376  | 35042138  | PDHX     |
| ENSG00000110442 | 9.095310434 | 9.385809746 | protein_coding   | 11 | 36295051  | 36310999  | COMMD9   |
| ENSG00000110446 | 5.286269488 | 5.09905904  | protein_coding   | 11 | 60704556  | 60720002  | SLC15A3  |
| ENSG00000110448 | 2.762599152 | 2.652276565 | protein_coding   | 11 | 60869867  | 60895324  | CD5      |
| ENSG00000110455 | 5.977159882 | 6.695185789 | protein_coding   | 11 | 44087475  | 44105772  | ACCS     |
| ENSG00000110492 | 8.217949183 | 6.530239731 | protein_coding   | 11 | 46402306  | 46405375  | MDK      |
| ENSG00000110497 | 9.144604451 | 9.009418947 | protein_coding   | 11 | 46417964  | 46615675  | AMBRA1   |
| ENSG00000110514 | 9.424324461 | 9.387150406 | protein_coding   | 11 | 47290712  | 47357945  | MADD     |
| ENSG00000110536 | 6.400645076 | 6.839280559 | protein_coding   | 11 | 47586982  | 47595013  | PTPMT1   |
| ENSG00000110583 | 8.497437504 | 8.591248608 | protein_coding   | 11 | 63706431  | 63724800  | NAA40    |
| ENSG00000110619 | 10.34932891 | 10.65728571 | protein_coding   | 11 | 3022152   | 3078843   | CARS     |
| ENSG00000110628 | 6.414691513 | 6.136428444 | protein_coding   | 11 | 2920951   | 2946476   | SLC22A18 |
| ENSG00000110651 | 11.88503548 | 12.37246026 | protein_coding   | 11 | 2397407   | 2418627   | CD81     |
| ENSG00000110660 | 10.09126063 | 9.653172715 | protein_coding   | 11 | 107661717 | 107799019 | SLC35F2  |
| ENSG00000110665 | 0.869158192 | 0.697730409 | protein_coding   | 11 | 2316875   | 2324279   | C11orf21 |
| ENSG00000110675 | 0.869158192 | 0.950786998 | protein_coding   | 11 | 107461817 | 107537505 | ELMOD1   |
| ENSG00000110693 | 0.869158192 | 1.518964905 | protein_coding   | 11 | 15987995  | 16761138  | SOX6     |
| ENSG00000110696 | 10.07863383 | 10.51369144 | protein_coding   | 11 | 16634679  | 16778649  | C11orf58 |
| ENSG00000110697 | 11.37213372 | 10.80602883 | protein_coding   | 11 | 67259239  | 67273734  | PITPNM1  |
| ENSG00000110700 | 11.08923145 | 11.82418014 | protein_coding   | 11 | 17095936  | 17099334  | RPS13    |
| ENSG00000110711 | 10.21028972 | 10.60264789 | protein_coding   | 11 | 67250512  | 67258574  | AIP      |
| ENSG00000110713 | 11.06243696 | 11.01340773 | protein_coding   | 11 | 3692313   | 3819022   | NUP98    |



|                 |             |             |                |    |           |           |          |
|-----------------|-------------|-------------|----------------|----|-----------|-----------|----------|
| ENSG00000110717 | 10.70839874 | 11.18527956 | protein_coding | 11 | 67798084  | 67804111  | NDUFS8   |
| ENSG00000110719 | 10.22481234 | 10.49547112 | protein_coding | 11 | 67806483  | 67818362  | TCIRG1   |
| ENSG00000110721 | 9.30213633  | 8.891561392 | protein_coding | 11 | 67820326  | 67888736  | CHKA     |
| ENSG00000110723 | 7.190493718 | 6.3217081   | protein_coding | 11 | 108376158 | 108464465 | EXPH5    |
| ENSG00000110756 | 8.49908645  | 8.891561392 | protein_coding | 11 | 18300223  | 18343745  | HPSS5    |
| ENSG00000110768 | 9.314363274 | 9.728615271 | protein_coding | 11 | 18343842  | 18388591  | GTF2H1   |
| ENSG00000110786 | 0           | 0.390640832 | protein_coding | 11 | 18749475  | 18814268  | PTPN5    |
| ENSG00000110799 | 1.407729925 | 0.390640832 | protein_coding | 12 | 6058040   | 6233936   | VWF      |
| ENSG00000110801 | 6.005279909 | 6.174194902 | protein_coding | 12 | 122326637 | 122356203 | PSMD9    |
| ENSG00000110811 | 9.200400892 | 9.343619007 | protein_coding | 12 | 6937204   | 6949018   | LEPREL2  |
| ENSG00000110841 | 9.587443199 | 9.218164439 | protein_coding | 12 | 27676364  | 27848497  | PPFIBP1  |
| ENSG00000110844 | 7.07583934  | 7.192052139 | protein_coding | 12 | 49962001  | 50038449  | PRPF40B  |
| ENSG00000110851 | 8.734271811 | 8.697730375 | protein_coding | 12 | 108126643 | 108155049 | PRDM4    |
| ENSG00000110852 | 1.616589159 | 1.925536307 | protein_coding | 12 | 10005583  | 10022735  | CLEC2B   |
| ENSG00000110871 | 7.933293789 | 8.001751392 | protein_coding | 12 | 120941077 | 120972237 | COQ5     |
| ENSG00000110876 | 5.141750194 | 5.792353798 | protein_coding | 12 | 109015686 | 109027735 | SELPLG   |
| ENSG00000110880 | 11.5189442  | 11.37137818 | protein_coding | 12 | 109038885 | 109125372 | CORO1C   |
| ENSG00000110881 | 5.795854912 | 5.317302248 | protein_coding | 12 | 50451331  | 50477394  | ACCN2    |
| ENSG00000110888 | 8.60394966  | 8.487570409 | protein_coding | 12 | 30862486  | 30907885  | CAPRN2   |
| ENSG00000110900 | 2.10647801  | 2.788380093 | protein_coding | 12 | 31079362  | 31149534  | TSPAN11  |
| ENSG00000110906 | 9.342189974 | 8.852301067 | protein_coding | 12 | 109886461 | 109915349 | KCTD10   |
| ENSG00000110911 | 10.14332937 | 10.44904791 | protein_coding | 12 | 51373184  | 51422349  | SLC11A2  |
| ENSG00000110917 | 11.32549834 | 11.19870325 | protein_coding | 12 | 121124672 | 121139667 | MLEC     |
| ENSG00000110921 | 8.398422578 | 7.080460027 | protein_coding | 12 | 110011060 | 110035067 | MVK      |
| ENSG00000110925 | 7.976547636 | 8.184028599 | protein_coding | 12 | 51454990  | 51477447  | CSRNP2   |
| ENSG00000110931 | 9.627946969 | 9.369623887 | protein_coding | 12 | 121675497 | 121736111 | CAMKK2   |
| ENSG00000110944 | 2.847891871 | 3.183544561 | protein_coding | 12 | 56732663  | 56734193  | IL23A    |
| ENSG00000110955 | 13.33555496 | 13.36290097 | protein_coding | 12 | 57031959  | 57039798  | ATP5B    |
| ENSG00000110958 | 12.24199224 | 12.14253511 | protein_coding | 12 | 57057127  | 57082159  | PTGES3   |
| ENSG00000110987 | 7.751556534 | 7.743685008 | protein_coding | 12 | 122457328 | 122499948 | BCL7A    |
| ENSG00000111011 | 9.397167781 | 9.456479577 | protein_coding | 12 | 122989240 | 123011547 | RSRC2    |
| ENSG00000111012 | 5.575999561 | 4.794098771 | protein_coding | 12 | 58156117  | 58161034  | CYP27B1  |
| ENSG00000111057 | 11.92007705 | 11.71070402 | protein_coding | 12 | 53342655  | 53346685  | KRT18    |
| ENSG00000111077 | 8.414239457 | 8.993663261 | protein_coding | 12 | 53440753  | 53458156  | TENC1    |
| ENSG00000111087 | 4.381167248 | 3.570966319 | protein_coding | 12 | 57853918  | 57866045  | GLI1     |
| ENSG00000111110 | 6.283060568 | 7.690381265 | protein_coding | 12 | 63038367  | 63328817  | PPM1H    |
| ENSG00000111142 | 9.580450822 | 9.721192935 | protein_coding | 12 | 95867296  | 95909615  | METAP2   |
| ENSG00000111144 | 9.869543962 | 9.607318979 | protein_coding | 12 | 96394606  | 96437298  | LTA4H    |
| ENSG00000111145 | 9.482995289 | 8.934374042 | protein_coding | 12 | 96588160  | 96663613  | ELK3     |
| ENSG00000111181 | 4.999881834 | 3.32456471  | protein_coding | 12 | 299243    | 323736    | SLC6A12  |
| ENSG00000111186 | 0           | 0.697730409 | protein_coding | 12 | 1639057   | 1756409   | WNT5B    |
| ENSG00000111196 | 7.440941622 | 7.405556541 | protein_coding | 12 | 10758612  | 10766222  | MAGOHB   |
| ENSG00000111199 | 6.350376764 | 3.532712221 | protein_coding | 12 | 110220890 | 110271212 | TRPV4    |
| ENSG00000111203 | 6.793601635 | 7.210344614 | protein_coding | 12 | 2921788   | 2968957   | ITFG2    |
| ENSG00000111206 | 10.62778887 | 10.07360272 | protein_coding | 12 | 2966847   | 2986206   | FOXM1    |
| ENSG00000111215 | 4.543379137 | 4.547834947 | protein_coding | 12 | 10977559  | 11324212  | PRR4     |
| ENSG00000111218 | 0           | 0.697730409 | protein_coding | 12 | 3490515   | 3703139   | PRMT8    |
| ENSG00000111224 | 7.367016815 | 6.839280559 | protein_coding | 12 | 3900213   | 3982608   | PARP11   |
| ENSG00000111229 | 9.437283511 | 9.730728943 | protein_coding | 12 | 110872630 | 110888227 | ARPC3    |
| ENSG00000111231 | 7.945439403 | 8.162268448 | protein_coding | 12 | 110890289 | 110907019 | GPN3     |
| ENSG00000111237 | 8.817245731 | 8.992782879 | protein_coding | 12 | 110928902 | 110939922 | VPS29    |
| ENSG00000111245 | 1.407729925 | 0           | protein_coding | 12 | 111348638 | 111358526 | MYL2     |
| ENSG00000111247 | 7.639400234 | 8.210017866 | protein_coding | 12 | 4647950   | 4669214   | RAD51AP1 |
| ENSG00000111249 | 1.616589159 | 0.390640832 | protein_coding | 12 | 111471828 | 111788358 | CUX2     |
| ENSG00000111252 | 9.527303063 | 8.955313173 | protein_coding | 12 | 111843752 | 111889427 | SH2B3    |
| ENSG00000111254 | 3.004694206 | 3.232099092 | protein_coding | 12 | 4724677   | 4758213   | AKAP3    |
| ENSG00000111261 | 4.593635215 | 3.183544561 | protein_coding | 12 | 12482198  | 12503475  | MANSC1   |
| ENSG00000111266 | 8.377059993 | 8.251828705 | protein_coding | 12 | 12628829  | 12715317  | DUSP16   |
| ENSG00000111269 | 8.417730894 | 8.524589435 | protein_coding | 12 | 12764761  | 12798042  | CREBL2   |
| ENSG00000111271 | 7.903720218 | 7.694718794 | protein_coding | 12 | 112123857 | 112194903 | ACAD10   |
| ENSG00000111275 | 5.389447744 | 5.564846512 | protein_coding | 12 | 112204691 | 112247782 | ALDH2    |
| ENSG00000111276 | 8.774313977 | 8.638170933 | protein_coding | 12 | 12867992  | 12875305  | CDKN1B   |
| ENSG00000111291 | 4.19837882  | 3.64455972  | protein_coding | 12 | 13093709  | 13105081  | GPRC5D   |

|                 |             |             |                |    |           |           |           |
|-----------------|-------------|-------------|----------------|----|-----------|-----------|-----------|
| ENSG00000111300 | 9.143550557 | 8.528239625 | protein_coding | 12 | 112464500 | 112546826 | NAA25     |
| ENSG00000111305 | 0.869158192 | 0.390640832 | protein_coding | 12 | 13236494  | 13256619  | GS61      |
| ENSG00000111319 | 8.472474444 | 3.453019579 | protein_coding | 12 | 6456009   | 6486896   | SCNN1A    |
| ENSG00000111321 | 10.52753755 | 9.87769557  | protein_coding | 12 | 6484211   | 6500733   | LTBR      |
| ENSG00000111325 | 3.698846687 | 3.714580548 | protein_coding | 12 | 123459127 | 123464590 | OGFOD2    |
| ENSG00000111328 | 8.041355121 | 7.764467022 | protein_coding | 12 | 123745528 | 123756881 | CDK2AP1   |
| ENSG00000111331 | 11.48043941 | 11.55793056 | protein_coding | 12 | 113376157 | 113411054 | OAS3      |
| ENSG00000111335 | 9.41124795  | 10.16005582 | protein_coding | 12 | 113416200 | 113449528 | OAS2      |
| ENSG00000111339 | 1.616589159 | 1.353254395 | protein_coding | 12 | 14978503  | 14996429  | ART4      |
| ENSG00000111341 | 7.250461488 | 7.799123587 | protein_coding | 12 | 15034115  | 15038860  | MGP       |
| ENSG00000111344 | 5.090170488 | 1.16600992  | protein_coding | 12 | 113536624 | 113574044 | RASAL1    |
| ENSG00000111348 | 6.171673665 | 4.990346085 | protein_coding | 12 | 15094951  | 15114662  | ARHGDI1   |
| ENSG00000111358 | 8.666918882 | 8.441856054 | protein_coding | 12 | 124118375 | 124146479 | GTF2H3    |
| ENSG00000111361 | 9.100750797 | 9.33252778  | protein_coding | 12 | 124104953 | 124118313 | EIF2B1    |
| ENSG00000111364 | 8.247679379 | 8.122575449 | protein_coding | 12 | 124086624 | 124105482 | DDX55     |
| ENSG00000111371 | 9.477150759 | 9.407772892 | protein_coding | 12 | 46581584  | 46663800  | SLC38A1   |
| ENSG00000111405 | 0.499066092 | 0           | protein_coding | 12 | 48103517  | 48119350  | ENDOU     |
| ENSG00000111412 | 7.514527001 | 7.394933125 | protein_coding | 12 | 117153593 | 117175875 | C12orf49  |
| ENSG00000111424 | 9.203438318 | 9.110276346 | protein_coding | 12 | 48235320  | 48336831  | VDR       |
| ENSG00000111445 | 8.502378699 | 8.671562585 | protein_coding | 12 | 118451393 | 118470935 | RFC5      |
| ENSG00000111450 | 8.307246212 | 8.377210474 | protein_coding | 12 | 131274145 | 131323811 | STX2      |
| ENSG00000111452 | 6.646617938 | 7.225413142 | protein_coding | 12 | 131438452 | 131626014 | GPR133    |
| ENSG00000111481 | 11.054609   | 10.84874214 | protein_coding | 12 | 54694986  | 54745633  | COP21     |
| ENSG00000111490 | 6.335686705 | 4.585695337 | protein_coding | 12 | 65174589  | 65274812  | TBC1D30   |
| ENSG00000111530 | 10.40887296 | 10.67797198 | protein_coding | 12 | 67663061  | 67713731  | CAND1     |
| ENSG00000111540 | 7.615275323 | 7.752033772 | protein_coding | 12 | 56367697  | 56388490  | RAB5B     |
| ENSG00000111554 | 5.785082014 | 6.568558581 | protein_coding | 12 | 68666223  | 68726161  | MDM1      |
| ENSG00000111581 | 9.211506993 | 9.316433258 | protein_coding | 12 | 69080514  | 69136785  | NUP107    |
| ENSG00000111596 | 9.229498191 | 9.209096633 | protein_coding | 12 | 70636774  | 70748773  | NCOT2     |
| ENSG00000111602 | 10.54000614 | 10.93697446 | protein_coding | 12 | 56810903  | 56843187  | TIMELESS  |
| ENSG00000111605 | 10.068119   | 10.06231762 | protein_coding | 12 | 69633317  | 69668138  | CPSF6     |
| ENSG00000111615 | 7.484876093 | 7.502758994 | protein_coding | 12 | 75890684  | 75905416  | KRR1      |
| ENSG00000111639 | 9.541775001 | 9.988277629 | protein_coding | 12 | 6601150   | 6603007   | MRPL51    |
| ENSG00000111640 | 15.33814457 | 15.0266238  | protein_coding | 12 | 6643093   | 6647537   | GAPDH     |
| ENSG00000111641 | 10.43839276 | 10.09427078 | protein_coding | 12 | 6666029   | 6677857   | NOP2      |
| ENSG00000111642 | 11.67205586 | 11.52633815 | protein_coding | 12 | 6679249   | 6716642   | CHD4      |
| ENSG00000111644 | 1.407729925 | 2.242360793 | protein_coding | 12 | 6747241   | 6756626   | ACRBP     |
| ENSG00000111647 | 8.074911866 | 8.036341107 | protein_coding | 12 | 100422233 | 100536626 | UHRF1BP1L |
| ENSG00000111652 | 9.738871124 | 9.57120918  | protein_coding | 12 | 6832907   | 6841041   | COP57A    |
| ENSG00000111653 | 6.693459083 | 7.077141316 | protein_coding | 12 | 6759446   | 6772314   | ING4      |
| ENSG00000111664 | 6.343050432 | 6.25865215  | protein_coding | 12 | 6949118   | 6956557   | GNB3      |
| ENSG00000111665 | 6.872051157 | 7.176629214 | protein_coding | 12 | 6957967   | 6961230   | CDCA3     |
| ENSG00000111666 | 8.096857104 | 8.044860491 | protein_coding | 12 | 102090725 | 102137918 | CHPT1     |
| ENSG00000111667 | 10.66938918 | 10.58435524 | protein_coding | 12 | 6961292   | 6975796   | USP5      |
| ENSG00000111669 | 12.53546772 | 12.62692064 | protein_coding | 12 | 6976283   | 6980112   | TPI1      |
| ENSG00000111670 | 8.617676359 | 9.137615924 | protein_coding | 12 | 102139275 | 102224716 | GNPTAB    |
| ENSG00000111671 | 6.212449006 | 6.246885341 | protein_coding | 12 | 6980099   | 6998522   | SPSB2     |
| ENSG00000111674 | 8.613115289 | 10.027493   | protein_coding | 12 | 7022909   | 7032861   | ENO2      |
| ENSG00000111676 | 11.76201644 | 11.23433547 | protein_coding | 12 | 7033626   | 7051484   | ATN1      |
| ENSG00000111678 | 7.33043718  | 8.511125832 | protein_coding | 12 | 7052141   | 7055166   | C12orf57  |
| ENSG00000111679 | 7.740446424 | 6.941369681 | protein_coding | 12 | 7055631   | 7070479   | PTPN6     |
| ENSG00000111684 | 9.772665583 | 8.635917101 | protein_coding | 12 | 7085348   | 7125814   | LPCAT3    |
| ENSG00000111696 | 8.229914881 | 7.737391576 | protein_coding | 12 | 104164231 | 104234975 | NT5DC3    |
| ENSG00000111704 | 0           | 0.950786998 | protein_coding | 12 | 7940390   | 7948655   | NANOG     |
| ENSG00000111707 | 8.93886971  | 8.387964709 | protein_coding | 12 | 118814185 | 118855840 | SUDS3     |
| ENSG00000111711 | 9.275444054 | 9.008548131 | protein_coding | 12 | 21654715  | 21671091  | GOLT1B    |
| ENSG00000111716 | 12.91086048 | 12.57492656 | protein_coding | 12 | 21788276  | 21910791  | LDHB      |
| ENSG00000111725 | 7.326727684 | 7.462626902 | protein_coding | 12 | 120105558 | 120119435 | PRKAB1    |
| ENSG00000111726 | 8.359012976 | 8.508664347 | protein_coding | 12 | 22199108  | 22218608  | CMAS      |
| ENSG00000111727 | 6.188122351 | 6.682138126 | protein_coding | 12 | 104458235 | 104498639 | HCFC2     |
| ENSG00000111728 | 3.211941663 | 4.761389014 | protein_coding | 12 | 22216707  | 22589975  | ST8SIA1   |
| ENSG00000111729 | 2.671945279 | 1.353254395 | protein_coding | 12 | 8276228   | 8291203   | CLEC4A    |
| ENSG00000111731 | 8.475827914 | 8.424985509 | protein_coding | 12 | 22601517  | 22697480  | KIAA0528  |

|                 |             |             |                |    |           |           |          |
|-----------------|-------------|-------------|----------------|----|-----------|-----------|----------|
| ENSG00000111732 | 1.616589159 | 1.16600992  | protein_coding | 12 | 8754762   | 8765467   | AICDA    |
| ENSG00000111737 | 9.643686274 | 9.378413761 | protein_coding | 12 | 120532899 | 120555306 | RAB35    |
| ENSG00000111752 | 5.938793061 | 5.767861411 | protein_coding | 12 | 9066492   | 9094063   | PHC1     |
| ENSG00000111775 | 7.54038131  | 7.903991977 | protein_coding | 12 | 120875893 | 120878545 | COX6A1   |
| ENSG00000111785 | 6.554468172 | 7.135740508 | protein_coding | 12 | 107168373 | 107283090 | RIC8B    |
| ENSG00000111786 | 10.56619858 | 10.44840588 | protein_coding | 12 | 120899471 | 120907596 | SRSF9    |
| ENSG00000111788 | 5.827699195 | 6.281901708 | pseudogene     | 12 | 9429831   | 9466684   |          |
| ENSG00000111790 | 7.959880444 | 7.962719647 | protein_coding | 12 | 27091316  | 27119583  | FGFR10P2 |
| ENSG00000111796 | 0.499066092 | 1.518964905 | protein_coding | 12 | 9747147   | 9760482   | KLRB1    |
| ENSG00000111799 | 11.19525848 | 11.96336745 | protein_coding | 6  | 75794042  | 75915767  | COL12A1  |
| ENSG00000111801 | 8.043616684 | 8.534302826 | protein_coding | 6  | 26440700  | 26453643  | BTN3A3   |
| ENSG00000111802 | 8.320363082 | 8.417132063 | protein_coding | 6  | 24650205  | 24667261  | TDP2     |
| ENSG00000111816 | 4.942865586 | 3.027231696 | protein_coding | 6  | 116262693 | 116381921 | FRK      |
| ENSG00000111817 | 10.25684158 | 10.25819969 | protein_coding | 6  | 116575336 | 116759442 | DSE      |
| ENSG00000111832 | 7.995363019 | 8.519708104 | protein_coding | 6  | 116892530 | 116918838 | RWDD1    |
| ENSG00000111834 | 0.499066092 | 1.518964905 | protein_coding | 6  | 116937642 | 116954148 | RSPH4A   |
| ENSG00000111837 | 3.448790144 | 3.714580548 | protein_coding | 6  | 10762956  | 10838764  | MAK      |
| ENSG00000111843 | 9.432113851 | 10.29508988 | protein_coding | 6  | 10723148  | 10731362  | TMEM14C  |
| ENSG00000111845 | 8.49908645  | 8.930701228 | protein_coding | 6  | 10694928  | 10710015  | PAK1IP1  |
| ENSG00000111846 | 8.80263159  | 8.759076187 | protein_coding | 6  | 10492456  | 10629601  | GCNT2    |
| ENSG00000111850 | 4.689181911 | 4.990346085 | protein_coding | 6  | 88032306  | 88052043  | C6orf162 |
| ENSG00000111859 | 9.932525987 | 10.43485697 | protein_coding | 6  | 11183531  | 11382581  | NEDD9    |
| ENSG00000111860 | 5.774228067 | 6.037446454 | protein_coding | 6  | 118781935 | 119031238 | CEP85L   |
| ENSG00000111863 | 4.517578978 | 4.676215056 | protein_coding | 6  | 11712287  | 11807279  | C6orf105 |
| ENSG00000111875 | 7.488200893 | 7.600774083 | protein_coding | 6  | 119215384 | 119230332 | ASF1A    |
| ENSG00000111877 | 6.313367288 | 6.064512706 | protein_coding | 6  | 119134618 | 119256327 | MCM9     |
| ENSG00000111879 | 0.499066092 | 0.950786998 | protein_coding | 6  | 119280928 | 119470552 | FAM184A  |
| ENSG00000111880 | 7.778963161 | 7.766528853 | protein_coding | 6  | 89319985  | 89673348  | RNGTT    |
| ENSG00000111885 | 9.451831075 | 9.222677059 | protein_coding | 6  | 119498374 | 119670926 | MAN1A1   |
| ENSG00000111886 | 1.407729925 | 0.697730409 | protein_coding | 6  | 89967239  | 90025018  | GABRR2   |
| ENSG00000111897 | 9.450979385 | 9.503595441 | protein_coding | 6  | 122764493 | 122907269 | SERINC1  |
| ENSG00000111906 | 8.114176072 | 8.437980325 | protein_coding | 6  | 125596496 | 125623282 | HDCC2    |
| ENSG00000111907 | 7.319279953 | 5.938503778 | protein_coding | 6  | 125440195 | 125585553 | TPD52L1  |
| ENSG00000111911 | 7.44778847  | 7.335063441 | protein_coding | 6  | 126277927 | 126301387 | HINT3    |
| ENSG00000111912 | 10.37110298 | 9.638612448 | protein_coding | 6  | 126102307 | 126252266 | NCOA7    |
| ENSG00000111913 | 2.238690726 | 2.579085888 | protein_coding | 6  | 24797601  | 25042238  | FAM65B   |
| ENSG00000111961 | 4.903563137 | 1.353254395 | protein_coding | 6  | 148593440 | 148873186 | SASH1    |
| ENSG00000111962 | 7.19863491  | 7.201227369 | protein_coding | 6  | 149068464 | 149398126 | UST      |
| ENSG00000111981 | 6.616550626 | 6.926693689 | protein_coding | 6  | 150285143 | 150294844 | ULBP1    |
| ENSG00000112029 | 7.797842652 | 8.316585024 | protein_coding | 6  | 153291664 | 153304714 | FBXO5    |
| ENSG00000112031 | 7.2307479   | 7.249200135 | protein_coding | 6  | 153308497 | 153323820 | MTRF1L   |
| ENSG00000112033 | 9.212512411 | 9.349132808 | protein_coding | 6  | 35310335  | 35395968  | PPARD    |
| ENSG00000112038 | 0           | 0.390640832 | protein_coding | 6  | 154331631 | 154568001 | OPRM1    |
| ENSG00000112039 | 7.706593329 | 7.648510984 | protein_coding | 6  | 35420138  | 35434880  | FANCE    |
| ENSG00000112041 | 1.16343121  | 1.353254395 | protein_coding | 6  | 35465651  | 35480715  | TULP1    |
| ENSG00000112053 | 1.16343121  | 2.144285137 | protein_coding | 6  | 35911291  | 35992645  | SLC26A8  |
| ENSG00000112062 | 9.620391278 | 9.860907117 | protein_coding | 6  | 35995488  | 36079013  | MAPK14   |
| ENSG00000112078 | 9.95492741  | 9.96826283  | protein_coding | 6  | 36410544  | 36458920  | KCTD20   |
| ENSG00000112079 | 9.323698603 | 9.624472234 | protein_coding | 6  | 36461669  | 36515247  | STK38    |
| ENSG00000112081 | 11.4283848  | 11.62693594 | protein_coding | 6  | 36562145  | 36571209  | SRSF3    |
| ENSG00000112096 | 14.09432195 | 14.437099   | protein_coding | 6  | 160100096 | 160183561 | SOD2     |
| ENSG00000112110 | 8.708847212 | 8.954409067 | protein_coding | 6  | 160210844 | 160219468 | MRPL18   |
| ENSG00000112118 | 10.70661584 | 10.90714709 | protein_coding | 6  | 52128807  | 52149582  | MCM3     |
| ENSG00000112130 | 8.164919416 | 8.530667964 | protein_coding | 6  | 37321748  | 37362514  | RNF8     |
| ENSG00000112137 | 2.847891871 | 3.279072565 | protein_coding | 6  | 12717893  | 13288645  | PHACTR1  |
| ENSG00000112139 | 5.207774174 | 6.174194902 | protein_coding | 6  | 37598455  | 37667082  | MDGA1    |
| ENSG00000112144 | 8.048129203 | 7.977035488 | protein_coding | 6  | 52866077  | 52926600  | ICK      |
| ENSG00000112146 | 8.727254249 | 9.119984878 | protein_coding | 6  | 52916789  | 52965671  | FBXO9    |
| ENSG00000112149 | 7.686472517 | 8.073455769 | protein_coding | 6  | 14117872  | 14137149  | CD83     |
| ENSG00000112159 | 9.928248471 | 9.720129478 | protein_coding | 6  | 90352218  | 90529442  | MDN1     |
| ENSG00000112167 | 6.907250452 | 7.389591938 | protein_coding | 6  | 39071840  | 39082965  | SAYSD1   |
| ENSG00000112175 | 4.062237333 | 2.501982735 | protein_coding | 6  | 55618443  | 55740362  | BMP5     |
| ENSG00000112182 | 4.517578978 | 4.363974406 | protein_coding | 6  | 90636248  | 91006627  | BACH2    |

|                 |             |             |                |   |           |           |          |
|-----------------|-------------|-------------|----------------|---|-----------|-----------|----------|
| ENSG00000112183 | 5.175139844 | 4.075511708 | protein_coding | 6 | 17281577  | 17294106  | RBM24    |
| ENSG00000112186 | 8.299696963 | 8.140175057 | protein_coding | 6 | 17393447  | 17558023  | CAP2     |
| ENSG00000112200 | 8.571403474 | 8.78167951  | protein_coding | 6 | 56951642  | 57035105  | ZNF451   |
| ENSG00000112208 | 8.150302734 | 8.377210474 | protein_coding | 6 | 57037124  | 57049735  | BAG2     |
| ENSG00000112210 | 7.030950614 | 7.348889996 | protein_coding | 6 | 57053581  | 57087078  | RAB23    |
| ENSG00000112212 | 1.616589159 | 1.667587519 | protein_coding | 6 | 41010293  | 41012076  | TSPO2    |
| ENSG00000112218 | 1.799000381 | 1.353254395 | protein_coding | 6 | 97245888  | 97285353  | GPR63    |
| ENSG00000112234 | 7.161632221 | 7.243290054 | protein_coding | 6 | 99321334  | 99395849  | FBXL4    |
| ENSG00000112237 | 9.191250057 | 9.028445114 | protein_coding | 6 | 99990256  | 100016849 | CCNC     |
| ENSG00000112242 | 8.978417134 | 9.138412238 | protein_coding | 6 | 20402137  | 20493945  | E2F3     |
| ENSG00000112245 | 10.4075566  | 9.744392843 | protein_coding | 6 | 64231666  | 64293492  | PTP4A1   |
| ENSG00000112249 | 9.755522437 | 9.569438796 | protein_coding | 6 | 100956070 | 101329248 | ASCC3    |
| ENSG00000112273 | 0           | 0.390640832 | protein_coding | 6 | 22569678  | 22571892  | HDGFL1   |
| ENSG00000112282 | 7.878603882 | 8.135396417 | protein_coding | 6 | 131895106 | 131949369 | MED23    |
| ENSG00000112290 | 8.269098624 | 8.576046394 | protein_coding | 6 | 110421022 | 110501207 | WASF1    |
| ENSG00000112293 | 1.16343121  | 2.144285137 | protein_coding | 6 | 24424793  | 24495433  | GPLD1    |
| ENSG00000112294 | 4.097495944 | 5.674321415 | protein_coding | 6 | 24495080  | 24537435  | ALDH5A1  |
| ENSG00000112297 | 10.22481234 | 9.026725794 | protein_coding | 6 | 106808784 | 107018335 | AIM1     |
| ENSG00000112299 | 7.928406768 | 9.110276346 | protein_coding | 6 | 133002729 | 133035188 | VNN1     |
| ENSG00000112303 | 3.274897671 | 2.912743273 | protein_coding | 6 | 133065009 | 133084598 | VNN2     |
| ENSG00000112304 | 7.759833327 | 7.996490656 | protein_coding | 6 | 24667263  | 24705293  | ACOT13   |
| ENSG00000112305 | 6.121171528 | 6.615068802 | protein_coding | 6 | 71377479  | 71571718  | SMAP1    |
| ENSG00000112306 | 11.42491909 | 12.11326566 | protein_coding | 6 | 133135580 | 133138703 | RPS12    |
| ENSG00000112308 | 11.02658594 | 11.21540346 | protein_coding | 6 | 24705089  | 24721064  | C6orf62  |
| ENSG00000112309 | 2.671945279 | 2.242360793 | protein_coding | 6 | 71566382  | 71666741  | B3GAT2   |
| ENSG00000112312 | 8.295907473 | 8.787783083 | protein_coding | 6 | 24775159  | 24786327  | GMNN     |
| ENSG00000112319 | 0.499066092 | 0           | protein_coding | 6 | 133561736 | 133853258 | EYA4     |
| ENSG00000112320 | 2.928422289 | 1.802319292 | protein_coding | 6 | 107811162 | 107981357 | SOBP     |
| ENSG00000112335 | 9.731875952 | 10.03691901 | protein_coding | 6 | 108532426 | 108582464 | SNX3     |
| ENSG00000112339 | 9.168633912 | 9.215148166 | protein_coding | 6 | 135281516 | 135424194 | HBS1L    |
| ENSG00000112343 | 7.596913151 | 7.786986696 | protein_coding | 6 | 25963030  | 25985348  | TRIM38   |
| ENSG00000112357 | 5.346128795 | 5.6022688   | protein_coding | 6 | 137143717 | 137235059 | PEX7     |
| ENSG00000112365 | 7.491518048 | 7.591499486 | protein_coding | 6 | 109783797 | 109804440 | ZBTB24   |
| ENSG00000112367 | 6.62865285  | 7.176629214 | protein_coding | 6 | 110012499 | 110146631 | FIG4     |
| ENSG00000112378 | 10.14332937 | 9.967814887 | protein_coding | 6 | 138411923 | 138428648 | PERP     |
| ENSG00000112379 | 1.616589159 | 4.202780776 | protein_coding | 6 | 138483058 | 138665800 | KIAA1244 |
| ENSG00000112406 | 7.440941622 | 7.582164879 | protein_coding | 6 | 139456249 | 139501939 | HECA     |
| ENSG00000112414 | 9.561637084 | 9.233897238 | protein_coding | 6 | 142622991 | 142767403 | GPR126   |
| ENSG00000112419 | 8.393111514 | 8.497535398 | protein_coding | 6 | 143857982 | 144152322 | PHACTR2  |
| ENSG00000112425 | 4.821592551 | 5.516660875 | protein_coding | 6 | 145822719 | 146057160 | EPM2A    |
| ENSG00000112473 | 11.21144195 | 11.37476113 | protein_coding | 6 | 33168222  | 33172216  | SLC39A7  |
| ENSG00000112486 | 0.499066092 | 0.390640832 | protein_coding | 6 | 167525295 | 167553184 | CCR6     |
| ENSG00000112494 | 1.407729925 | 0.697730409 | protein_coding | 6 | 167684657 | 167729507 | UNC93A   |
| ENSG00000112511 | 8.380642463 | 8.374509343 | protein_coding | 6 | 33378176  | 33384230  | PHF1     |
| ENSG00000112514 | 9.632461462 | 10.12191245 | protein_coding | 6 | 33384219  | 33386094  | CUTA     |
| ENSG00000112531 | 10.31930939 | 10.42998708 | protein_coding | 6 | 163835032 | 163999628 | QKI      |
| ENSG00000112541 | 2.671945279 | 1.667587519 | protein_coding | 6 | 165740776 | 166075588 | PDE10A   |
| ENSG00000112559 | 7.599989788 | 6.559073862 | protein_coding | 6 | 41604620  | 41621984  | MDF1     |
| ENSG00000112561 | 5.995967334 | 6.382123086 | protein_coding | 6 | 41651716  | 41703997  | TFEB     |
| ENSG00000112576 | 9.419108071 | 9.115138778 | protein_coding | 6 | 41902671  | 42018095  | CCND3    |
| ENSG00000112578 | 9.037480115 | 8.918699593 | protein_coding | 6 | 41888926  | 41900784  | BYSL     |
| ENSG00000112584 | 7.916116295 | 8.185570409 | protein_coding | 6 | 170599791 | 170716153 | FAM120B  |
| ENSG00000112592 | 7.457998197 | 7.591499486 | protein_coding | 6 | 170863390 | 170881957 | TBP      |
| ENSG00000112599 | 3.830412367 | 3.133298822 | protein_coding | 6 | 42152139  | 42162694  | GUCA1B   |
| ENSG00000112619 | 0.499066092 | 0           | protein_coding | 6 | 42664340  | 42690312  | PRPH2    |
| ENSG00000112624 | 7.76258174  | 7.819127564 | protein_coding | 6 | 42714696  | 42836296  | KIAA0240 |
| ENSG00000112640 | 9.813659349 | 9.754296791 | protein_coding | 6 | 42952237  | 42980080  | PPP2R5D  |
| ENSG00000112651 | 9.071126069 | 9.317839931 | protein_coding | 6 | 43021767  | 43027544  | MRPL2    |
| ENSG00000112655 | 9.718490953 | 9.678031042 | protein_coding | 6 | 43044006  | 43129457  | PTK7     |
| ENSG00000112658 | 10.02642002 | 9.801313989 | protein_coding | 6 | 43139037  | 43149243  | SRF      |
| ENSG00000112659 | 8.762005612 | 9.009418947 | protein_coding | 6 | 43149913  | 43192325  | CUL9     |
| ENSG00000112664 | 8.953376332 | 9.055679178 | protein_coding | 6 | 34255997  | 34360451  | NUDT3    |
| ENSG00000112667 | 8.947349623 | 9.53356709  | protein_coding | 6 | 43193367  | 43197222  | C6orf108 |

|                 |             |             |                |    |           |           |          |
|-----------------|-------------|-------------|----------------|----|-----------|-----------|----------|
| ENSG00000112679 | 7.514527001 | 8.14493792  | protein_coding | 6  | 292097    | 351355    | DUSP22   |
| ENSG00000112685 | 9.085465781 | 8.859080135 | protein_coding | 6  | 485133    | 693117    | EXOC2    |
| ENSG00000112695 | 8.666918882 | 9.167571071 | protein_coding | 6  | 75947391  | 75960039  | COX7A2   |
| ENSG00000112697 | 10.45335453 | 10.60004881 | protein_coding | 6  | 75962640  | 75994684  | TMEM30A  |
| ENSG00000112699 | 8.470794781 | 8.151264044 | protein_coding | 6  | 1624041   | 2245926   | GMDS     |
| ENSG00000112701 | 9.022652927 | 9.232406246 | protein_coding | 6  | 76311225  | 76427997  | SENP6    |
| ENSG00000112706 | 0.869158192 | 0.390640832 | protein_coding | 6  | 76630832  | 76782395  | IMPG1    |
| ENSG00000112715 | 11.05544975 | 12.05108658 | protein_coding | 6  | 43737921  | 43754224  | VEGFA    |
| ENSG00000112739 | 9.886021803 | 10.29187254 | protein_coding | 6  | 4021501   | 4065217   | PRPF4B   |
| ENSG00000112742 | 8.665451116 | 8.791837833 | protein_coding | 6  | 80713604  | 80752244  | TTK      |
| ENSG00000112759 | 9.99696351  | 9.697613846 | protein_coding | 6  | 44187242  | 44201888  | SLC29A1  |
| ENSG00000112761 | 1.616589159 | 1.518964905 | protein_coding | 6  | 112375275 | 112392171 | WISP3    |
| ENSG00000112763 | 7.757079669 | 8.24888207  | protein_coding | 6  | 26458150  | 26476849  | BTN2A1   |
| ENSG00000112769 | 0.869158192 | 0           | protein_coding | 6  | 112429963 | 112576141 | LAMA4    |
| ENSG00000112773 | 7.461385447 | 7.701200733 | protein_coding | 6  | 82201156  | 82462491  | FAM46A   |
| ENSG00000112782 | 0           | 0.390640832 | protein_coding | 6  | 45848750  | 46048132  | CLIC5    |
| ENSG00000112787 | 10.19612778 | 9.641985576 | protein_coding | 12 | 133066137 | 133161774 | FBRSL1   |
| ENSG00000112796 | 0           | 0.390640832 | protein_coding | 6  | 46128152  | 46138708  | ENPP5    |
| ENSG00000112812 | 6.103936836 | 6.198834244 | protein_coding | 6  | 27215480  | 27224403  | PRSS16   |
| ENSG00000112851 | 10.08358792 | 9.870524428 | protein_coding | 5  | 65222303  | 65378377  | ERBB2IP  |
| ENSG00000112852 | 6.032862302 | 7.272601283 | protein_coding | 5  | 140474227 | 140476962 | PCDHB2   |
| ENSG00000112855 | 8.18144485  | 8.302443832 | protein_coding | 5  | 140071011 | 140078889 | HARS2    |
| ENSG00000112874 | 6.343050432 | 6.408769788 | protein_coding | 5  | 102884556 | 102898494 | NUDT12   |
| ENSG00000112877 | 8.039090007 | 7.598461017 | protein_coding | 5  | 612387    | 667283    | CEP72    |
| ENSG00000112893 | 9.437283511 | 9.518964886 | protein_coding | 5  | 109025067 | 109205326 | MAN2A1   |
| ENSG00000112902 | 5.331395195 | 5.248158938 | protein_coding | 5  | 9035138   | 9546187   | SEMA5A   |
| ENSG00000112936 | 0           | 0.697730409 | protein_coding | 5  | 40909354  | 40983041  | C7       |
| ENSG00000112941 | 9.740266097 | 9.554600493 | protein_coding | 5  | 6714718   | 6757161   | PAPD7    |
| ENSG00000112972 | 10.83522323 | 9.050611798 | protein_coding | 5  | 43289497  | 43313614  | HMGCS1   |
| ENSG00000112977 | 11.76681548 | 11.38419141 | protein_coding | 5  | 10679342  | 10761384  | DAP      |
| ENSG00000112981 | 2.10647801  | 0.390640832 | protein_coding | 5  | 137450866 | 137475132 | NME5     |
| ENSG00000112983 | 8.521975964 | 9.066597822 | protein_coding | 5  | 137475455 | 137514675 | BRD8     |
| ENSG00000112984 | 9.612034058 | 9.296594447 | protein_coding | 5  | 137514408 | 137523404 | KIF20A   |
| ENSG00000112992 | 7.609180529 | 7.519971735 | protein_coding | 5  | 43602791  | 43707507  | NNT      |
| ENSG00000112996 | 9.882867569 | 9.70837941  | protein_coding | 5  | 44809027  | 44820530  | MRPS30   |
| ENSG00000113013 | 11.92483898 | 11.82356136 | protein_coding | 5  | 137890571 | 137911133 | HSPA9    |
| ENSG00000113048 | 9.860592703 | 9.623335007 | protein_coding | 5  | 71515236  | 71616473  | MRPS27   |
| ENSG00000113068 | 8.713115882 | 8.926097022 | protein_coding | 5  | 139624624 | 139682706 | PFDN1    |
| ENSG00000113070 | 8.422952257 | 8.163833676 | protein_coding | 5  | 139712428 | 139726216 | HBEGF    |
| ENSG00000113073 | 2.35979773  | 2.039052734 | protein_coding | 5  | 139739787 | 139754722 | SLC4A9   |
| ENSG00000113083 | 10.35161244 | 10.31600547 | protein_coding | 5  | 121398890 | 121414206 | LOX      |
| ENSG00000113108 | 6.622614428 | 7.012590419 | protein_coding | 5  | 139937853 | 139973337 | APBB3    |
| ENSG00000113119 | 7.136425764 | 7.204272857 | protein_coding | 5  | 140019012 | 140024993 | TMCO6    |
| ENSG00000113140 | 11.41730868 | 12.48692692 | protein_coding | 5  | 151040657 | 151066726 | SPARC    |
| ENSG00000113141 | 9.578112479 | 9.370301936 | protein_coding | 5  | 140026643 | 140042064 | IK       |
| ENSG00000113161 | 9.332049062 | 8.675956977 | protein_coding | 5  | 74632154  | 74657929  | HMGCR    |
| ENSG00000113163 | 8.417730894 | 8.696649474 | protein_coding | 5  | 74664311  | 74807963  | COL4A3BP |
| ENSG00000113194 | 9.439002622 | 9.439780161 | protein_coding | 5  | 175874629 | 175937075 | FAF2     |
| ENSG00000113205 | 3.698846687 | 3.781359661 | protein_coding | 5  | 140480234 | 140483406 | PCDHB3   |
| ENSG00000113209 | 6.188122351 | 6.941369681 | protein_coding | 5  | 140514800 | 140517703 | PCDHB5   |
| ENSG00000113211 | 3.077135474 | 3.411459265 | protein_coding | 5  | 140529683 | 140532868 | PCDHB6   |
| ENSG00000113212 | 2.847891871 | 3.133298822 | protein_coding | 5  | 140552243 | 140555957 | PCDHB7   |
| ENSG00000113231 | 4.19837882  | 3.532712221 | protein_coding | 5  | 76506274  | 76725632  | PDE8B    |
| ENSG00000113240 | 6.687686437 | 7.195117037 | protein_coding | 5  | 178029665 | 178057616 | CLK4     |
| ENSG00000113248 | 5.4452544   | 5.516660875 | protein_coding | 5  | 140625147 | 140627799 | PCDHB15  |
| ENSG00000113249 | 0           | 0.697730409 | protein_coding | 5  | 156456424 | 156486130 | HAVCR1   |
| ENSG00000113262 | 2.10647801  | 2.652276565 | protein_coding | 5  | 178392096 | 178423207 | GRM6     |
| ENSG00000113269 | 8.333361768 | 9.093127603 | protein_coding | 5  | 179345911 | 179499118 | RNF130   |
| ENSG00000113272 | 6.252103507 | 6.843193319 | protein_coding | 5  | 157158205 | 157168456 | THG1L    |
| ENSG00000113273 | 7.773523328 | 7.760334499 | protein_coding | 5  | 78073032  | 78281910  | ARSB     |
| ENSG00000113282 | 9.646664866 | 9.9763021   | protein_coding | 5  | 157212751 | 157286183 | CLINT1   |
| ENSG00000113296 | 3.004694206 | 3.748356452 | protein_coding | 5  | 79287134  | 79379110  | THBS4    |
| ENSG00000113300 | 9.194306789 | 9.043827484 | protein_coding | 5  | 179921412 | 180005405 | CNOT6    |

|                 |             |             |                |   |           |           |          |
|-----------------|-------------|-------------|----------------|---|-----------|-----------|----------|
| ENSG00000113312 | 8.284478912 | 8.558303982 | protein_coding | 5 | 159436120 | 159492518 | TTC1     |
| ENSG00000113318 | 7.46813618  | 7.480322213 | protein_coding | 5 | 79950467  | 80172631  | MSH3     |
| ENSG00000113319 | 2.471521042 | 2.912743273 | protein_coding | 5 | 80256491  | 80525975  | RASGRF2  |
| ENSG00000113328 | 9.31529953  | 9.110276346 | protein_coding | 5 | 162864575 | 162875197 | CCNG1    |
| ENSG00000113356 | 8.245716314 | 7.940975956 | protein_coding | 5 | 89767565  | 89810370  | POLR3G   |
| ENSG00000113360 | 10.68287268 | 10.33558093 | protein_coding | 5 | 31400604  | 31532303  | DROSHA   |
| ENSG00000113368 | 10.09562678 | 9.615349218 | protein_coding | 5 | 126112315 | 126172712 | LMNB1    |
| ENSG00000113369 | 9.385625588 | 9.827226448 | protein_coding | 5 | 90664541  | 90679176  | ARRDC3   |
| ENSG00000113384 | 10.79215866 | 10.29936853 | protein_coding | 5 | 32124810  | 32174456  | GOLPH3   |
| ENSG00000113387 | 10.48615002 | 10.60091569 | protein_coding | 5 | 32531739  | 32604185  | SUB1     |
| ENSG00000113389 | 4.999881834 | 2.242360793 | protein_coding | 5 | 32689176  | 32791819  | NPR3     |
| ENSG00000113391 | 6.400645076 | 6.530239731 | protein_coding | 5 | 92953775  | 93447404  | FAM172A  |
| ENSG00000113407 | 12.23446399 | 12.07415977 | protein_coding | 5 | 33440802  | 33469644  | TARS     |
| ENSG00000113441 | 8.971306859 | 9.115138778 | protein_coding | 5 | 96271098  | 96373219  | LNPEP    |
| ENSG00000113448 | 7.194570056 | 6.95589788  | protein_coding | 5 | 58264865  | 59817947  | PDE4D    |
| ENSG00000113456 | 8.46911316  | 8.693401904 | protein_coding | 5 | 34905369  | 34919094  | RAD1     |
| ENSG00000113460 | 9.380267116 | 9.326950027 | protein_coding | 5 | 34915481  | 34926101  | BRIX1    |
| ENSG00000113494 | 3.004694206 | 1.16600992  | protein_coding | 5 | 35048861  | 35230794  | PRLR     |
| ENSG00000113504 | 10.54639963 | 10.47134059 | protein_coding | 5 | 1050499   | 1112172   | SLC12A7  |
| ENSG00000113520 | 0           | 0.950786998 | protein_coding | 5 | 132009678 | 132018368 | IL4      |
| ENSG00000113522 | 8.983137923 | 8.878275203 | protein_coding | 5 | 131891711 | 131980313 | RAD50    |
| ENSG00000113525 | 0           | 0.390640832 | protein_coding | 5 | 131877136 | 131892530 | IL5      |
| ENSG00000113552 | 9.578112479 | 9.31220499  | protein_coding | 5 | 141371314 | 141392606 | GNPDA1   |
| ENSG00000113555 | 4.165528823 | 4.406904905 | protein_coding | 5 | 141323150 | 141349304 | PCDH12   |
| ENSG00000113558 | 9.947096215 | 10.51123433 | protein_coding | 5 | 133492082 | 133561762 | SKP1     |
| ENSG00000113569 | 11.05768934 | 10.68480201 | protein_coding | 5 | 37288239  | 37371283  | NUP155   |
| ENSG00000113575 | 9.931915689 | 9.818806167 | protein_coding | 5 | 133530025 | 133561833 | PPP2CA   |
| ENSG00000113578 | 3.950976309 | 4.7279204   | protein_coding | 5 | 141971743 | 142077617 | FGF1     |
| ENSG00000113580 | 10.05472661 | 9.922303325 | protein_coding | 5 | 142657496 | 142815077 | NR3C1    |
| ENSG00000113583 | 9.155101256 | 9.522629316 | protein_coding | 5 | 133291201 | 133304478 | C5orf15  |
| ENSG00000113593 | 8.118473522 | 8.283850589 | protein_coding | 5 | 64859063  | 64883376  | PPWD1    |
| ENSG00000113594 | 9.143550557 | 8.464894292 | protein_coding | 5 | 38475065  | 38608456  | LIFR     |
| ENSG00000113595 | 6.727618145 | 6.923001245 | protein_coding | 5 | 64885507  | 64921802  | TRIM23   |
| ENSG00000113597 | 7.356139979 | 7.475288518 | protein_coding | 5 | 64920543  | 64962060  | C5orf44  |
| ENSG00000113615 | 9.43383913  | 9.250933796 | protein_coding | 5 | 133984479 | 134063513 | SEC24A   |
| ENSG00000113621 | 8.314756163 | 8.865827498 | protein_coding | 5 | 134209460 | 134237323 | TXNDC15  |
| ENSG00000113638 | 7.935731106 | 8.090015513 | protein_coding | 5 | 40714577  | 40756077  | TTC33    |
| ENSG00000113643 | 9.791627126 | 9.954311532 | protein_coding | 5 | 167913450 | 167946304 | RARS     |
| ENSG00000113645 | 10.33647394 | 10.12753823 | protein_coding | 5 | 167718656 | 167899308 | WWC1     |
| ENSG00000113648 | 10.2188207  | 10.021894   | protein_coding | 5 | 134669590 | 134735604 | H2AFY    |
| ENSG00000113649 | 10.14227455 | 9.834615514 | protein_coding | 5 | 145826874 | 145891524 | TCERG1   |
| ENSG00000113657 | 9.507778518 | 9.900875954 | protein_coding | 5 | 146770374 | 146889619 | DPYSL3   |
| ENSG00000113658 | 9.393626162 | 9.062408117 | protein_coding | 5 | 135468534 | 135524435 | SMAD5    |
| ENSG00000113712 | 9.723436728 | 9.355995556 | protein_coding | 5 | 148871760 | 148931007 | CSNK1A1  |
| ENSG00000113716 | 9.512684482 | 9.370301936 | protein_coding | 5 | 149379884 | 149432386 | HMGXB3   |
| ENSG00000113719 | 10.68396043 | 10.36615554 | protein_coding | 5 | 172261278 | 172379688 | ERGIC1   |
| ENSG00000113721 | 5.036678094 | 6.35497494  | protein_coding | 5 | 149493400 | 149535423 | PDGFRB   |
| ENSG00000113732 | 9.829474056 | 10.28361771 | protein_coding | 5 | 172410760 | 172462448 | ATP6V0E1 |
| ENSG00000113734 | 6.541724534 | 6.525377513 | protein_coding | 5 | 172571445 | 172591390 | BNIP1    |
| ENSG00000113739 | 10.81749069 | 11.3533149  | protein_coding | 5 | 172741716 | 172756506 | STC2     |
| ENSG00000113742 | 7.334137164 | 7.426571535 | protein_coding | 5 | 173315283 | 173388979 | CPEB4    |
| ENSG00000113749 | 0           | 0.390640832 | protein_coding | 5 | 175085033 | 175113245 | HRH2     |
| ENSG00000113758 | 10.10215133 | 10.23269872 | protein_coding | 5 | 176883609 | 176901402 | DBN1     |
| ENSG00000113761 | 7.308035767 | 7.309836726 | protein_coding | 5 | 176449697 | 176508190 | ZNF346   |
| ENSG00000113763 | 5.036678094 | 2.501982735 | protein_coding | 5 | 176237478 | 176307897 | UNC5A    |
| ENSG00000113790 | 6.592037289 | 6.246885341 | protein_coding | 3 | 184907503 | 184999778 | EHHADH   |
| ENSG00000113810 | 10.43150107 | 10.32232659 | protein_coding | 3 | 160117062 | 160152750 | SMC4     |
| ENSG00000113811 | 7.474855471 | 7.575124073 | protein_coding | 3 | 53918437  | 53926015  |          |
| ENSG00000113812 | 7.781675404 | 7.924450389 | protein_coding | 3 | 53901093  | 53916229  | ACTR8    |
| ENSG00000113838 | 6.882196036 | 6.729413443 | protein_coding | 3 | 186263862 | 186288332 | TBCCD1   |
| ENSG00000113845 | 9.385625588 | 9.68785567  | protein_coding | 3 | 119217379 | 119243937 | TIMMDC1  |
| ENSG00000113851 | 7.01259661  | 7.551403417 | protein_coding | 3 | 3190676   | 3221394   | CRBN     |
| ENSG00000113916 | 7.89873181  | 8.443145654 | protein_coding | 3 | 187439165 | 187463515 | BCL6     |

|                 |             |             |                |    |           |           |          |
|-----------------|-------------|-------------|----------------|----|-----------|-----------|----------|
| ENSG00000113924 | 0.869158192 | 0.950786998 | protein_coding | 3  | 120347020 | 120401418 | HGD      |
| ENSG00000113946 | 3.698846687 | 3.608232228 | protein_coding | 3  | 190040330 | 190129932 | CLDN16   |
| ENSG00000113966 | 5.360713447 | 5.526427614 | protein_coding | 3  | 97483365  | 97519953  | ARL6     |
| ENSG00000113971 | 6.92698535  | 7.210344614 | protein_coding | 3  | 132276986 | 132441303 | NPHP3    |
| ENSG00000114019 | 10.30806544 | 9.622766057 | protein_coding | 3  | 134074716 | 134094321 | AMOTL2   |
| ENSG00000114021 | 8.470794781 | 8.914056863 | protein_coding | 3  | 100053545 | 100074449 | NIT2     |
| ENSG00000114023 | 8.274885464 | 8.896276962 | protein_coding | 3  | 122103023 | 122131181 | FAM162A  |
| ENSG00000114026 | 7.461385447 | 7.635032283 | protein_coding | 3  | 9791628   | 9829903   | OGG1     |
| ENSG00000114030 | 10.2292898  | 10.06525187 | protein_coding | 3  | 122140796 | 122233792 | KPNA1    |
| ENSG00000114054 | 9.440719688 | 9.764649066 | protein_coding | 3  | 135969148 | 136056738 | PCCB     |
| ENSG00000114062 | 9.38294884  | 9.253876247 | protein_coding | 15 | 25582381  | 25684128  | UBE3A    |
| ENSG00000114098 | 8.201838958 | 8.196317182 | protein_coding | 3  | 137906109 | 138017231 | ARMC8    |
| ENSG00000114107 | 7.127924785 | 6.762847836 | protein_coding | 3  | 138213186 | 138313380 | CEP70    |
| ENSG00000114113 | 0.499066092 | 0           | protein_coding | 3  | 139171726 | 139199589 | RBP2     |
| ENSG00000114115 | 1.16343121  | 0.697730409 | protein_coding | 3  | 139236276 | 139258671 | RBP1     |
| ENSG00000114120 | 9.587443199 | 9.592867142 | protein_coding | 3  | 140660672 | 140698775 | SLC25A36 |
| ENSG00000114125 | 9.188186835 | 9.01636662  | protein_coding | 3  | 141457046 | 141466402 | RNF7     |
| ENSG00000114126 | 9.396283191 | 9.378413761 | protein_coding | 3  | 141663277 | 141868386 | TFDP2    |
| ENSG00000114127 | 8.426422697 | 8.402622096 | protein_coding | 3  | 142025449 | 142166904 | XRN1     |
| ENSG00000114166 | 5.60078458  | 6.104183162 | protein_coding | 3  | 20081515  | 20195896  | KAT2B    |
| ENSG00000114200 | 0.869158192 | 0           | protein_coding | 3  | 165490692 | 165555260 | BCHE     |
| ENSG00000114209 | 8.231899551 | 8.394645624 | protein_coding | 3  | 167401086 | 167452727 | PDCD10   |
| ENSG00000114251 | 5.660945913 | 5.150490275 | protein_coding | 3  | 55499743  | 55523973  | WNT5A    |
| ENSG00000114268 | 8.112022537 | 8.565427152 | protein_coding | 3  | 48555117  | 48599448  | PFKFB4   |
| ENSG00000114270 | 11.93477291 | 12.15989435 | protein_coding | 3  | 48601506  | 48632700  | COL7A1   |
| ENSG00000114279 | 0           | 0.390640832 | protein_coding | 3  | 191859684 | 192485553 | FGF12    |
| ENSG00000114302 | 9.741659723 | 9.510378177 | protein_coding | 3  | 48782030  | 48885279  | PRKAR2A  |
| ENSG00000114315 | 11.0376904  | 9.073276144 | protein_coding | 3  | 193853934 | 193856521 | HES1     |
| ENSG00000114316 | 9.249228746 | 9.386480232 | protein_coding | 3  | 49315264  | 49378145  | USP4     |
| ENSG00000114331 | 8.962967004 | 8.68797299  | protein_coding | 3  | 194995465 | 195163807 | ACAP2    |
| ENSG00000114346 | 10.00974407 | 9.881029944 | protein_coding | 3  | 172468472 | 172539264 | ECT2     |
| ENSG00000114349 | 0.499066092 | 0.390640832 | protein_coding | 3  | 50229045  | 50233949  | GNAT1    |
| ENSG00000114353 | 11.61502948 | 11.56120056 | protein_coding | 3  | 50263724  | 50296787  | GNAI2    |
| ENSG00000114354 | 10.54320643 | 10.45161314 | protein_coding | 3  | 100428205 | 100467810 | TFG      |
| ENSG00000114374 | 0.499066092 | 0           | protein_coding | Y  | 14813160  | 14972764  | USP9Y    |
| ENSG00000114378 | 4.942865586 | 3.96493948  | protein_coding | 3  | 50337320  | 50349812  | HYAL1    |
| ENSG00000114383 | 7.639400234 | 7.918899532 | protein_coding | 3  | 50357458  | 50365682  | TUSC2    |
| ENSG00000114388 | 7.488200893 | 7.815148897 | protein_coding | 3  | 50384761  | 50388522  | NPRL2    |
| ENSG00000114391 | 10.70554504 | 11.17987491 | protein_coding | 3  | 101399935 | 101405626 | RPL24    |
| ENSG00000114395 | 7.31554162  | 7.844724842 | protein_coding | 3  | 50388126  | 50395891  | CYB561D2 |
| ENSG00000114405 | 6.386460534 | 6.091080508 | protein_coding | 3  | 62304648  | 62321888  | C3orf14  |
| ENSG00000114416 | 10.47739354 | 10.30185857 | protein_coding | 3  | 180585929 | 180694950 | FXR1     |
| ENSG00000114423 | 7.206730419 | 7.487839978 | protein_coding | 3  | 105374305 | 105588396 | CBLB     |
| ENSG00000114439 | 10.46394731 | 10.46119237 | protein_coding | 3  | 107241783 | 107530171 | BBX      |
| ENSG00000114446 | 9.034071956 | 8.775550005 | protein_coding | 3  | 107879659 | 107941417 | IFT57    |
| ENSG00000114450 | 8.613115289 | 8.349968848 | protein_coding | 3  | 179116990 | 179169378 | GNB4     |
| ENSG00000114455 | 0           | 0.950786998 | protein_coding | 3  | 108015376 | 108097132 | HHLA2    |
| ENSG00000114473 | 6.35766608  | 6.424524724 | protein_coding | 3  | 197615946 | 197687013 | IQCG     |
| ENSG00000114480 | 9.527303063 | 9.660952415 | protein_coding | 3  | 81538850  | 81811312  | GBE1     |
| ENSG00000114491 | 8.890689734 | 9.023280994 | protein_coding | 3  | 124449213 | 124464040 | UMPS     |
| ENSG00000114503 | 9.839921696 | 9.535986486 | protein_coding | 3  | 196662273 | 196669468 | NCBP2    |
| ENSG00000114520 | 7.76258174  | 7.998246367 | protein_coding | 3  | 125165495 | 125239041 | SNX4     |
| ENSG00000114529 | 6.704935538 | 6.210997888 | protein_coding | 3  | 111805182 | 111849851 | C3orf52  |
| ENSG00000114541 | 7.384964606 | 6.24096575  | protein_coding | 3  | 69219141  | 69591734  | FRMD4B   |
| ENSG00000114544 | 8.027710784 | 7.890820294 | protein_coding | 3  | 125725198 | 125820404 | SLC41A3  |
| ENSG00000114547 | 0.869158192 | 0.390640832 | protein_coding | 3  | 125687987 | 125702297 | ROPN1B   |
| ENSG00000114554 | 11.47772401 | 11.03302417 | protein_coding | 3  | 126707437 | 126756235 | PLXNA1   |
| ENSG00000114573 | 9.535360944 | 9.119984878 | protein_coding | 3  | 113465664 | 113530903 | ATP6V1A  |
| ENSG00000114626 | 6.979904289 | 7.718344862 | protein_coding | 3  | 127391778 | 127399768 | ABTB1    |
| ENSG00000114631 | 9.812996626 | 10.30576281 | protein_coding | 3  | 127348024 | 127391652 | PODXL2   |
| ENSG00000114646 | 1.616589159 | 1.353254395 | protein_coding | 3  | 47603729  | 47622282  | CSPG5    |
| ENSG00000114648 | 8.453889713 | 8.492561507 | protein_coding | 3  | 47324407  | 47388306  | KLHL18   |
| ENSG00000114650 | 10.11296043 | 9.975856648 | protein_coding | 3  | 47455184  | 47518616  | SCAP     |

|                 |             |             |                |   |           |           |          |
|-----------------|-------------|-------------|----------------|---|-----------|-----------|----------|
| ENSG00000114654 | 0           | 1.353254395 | protein_coding | 3 | 128720472 | 128759585 | CCDC48   |
| ENSG00000114656 | 1.616589159 | 0.950786998 | protein_coding | 3 | 128628709 | 128721533 | KIAA1257 |
| ENSG00000114670 | 5.072559152 | 5.072639111 | protein_coding | 3 | 130745694 | 131069309 | NEK11    |
| ENSG00000114686 | 10.3876657  | 10.21242219 | protein_coding | 3 | 131181068 | 131221827 | MRPL3    |
| ENSG00000114698 | 3.698846687 | 4.528525526 | protein_coding | 3 | 145910126 | 145968966 | PLSCR4   |
| ENSG00000114735 | 7.35977471  | 7.862183683 | protein_coding | 3 | 50606583  | 50622366  | HEMK1    |
| ENSG00000114737 | 4.800350936 | 4.342020395 | protein_coding | 3 | 50643921  | 50649262  | CISH     |
| ENSG00000114738 | 9.689899429 | 9.29015931  | protein_coding | 3 | 50648951  | 50686720  | MAPKAPK3 |
| ENSG00000114739 | 5.239686603 | 4.794098771 | protein_coding | 3 | 38495342  | 38524948  | ACVR2B   |
| ENSG00000114742 | 8.207901394 | 8.741364159 | protein_coding | 3 | 39093489  | 39138155  | WDR48    |
| ENSG00000114744 | 7.988335976 | 7.683850422 | protein_coding | 3 | 149456257 | 149470286 | COMMD2   |
| ENSG00000114745 | 8.342575358 | 8.398639372 | protein_coding | 3 | 39138150  | 39149854  | GORASP1  |
| ENSG00000114757 | 1.616589159 | 2.039052734 | protein_coding | 3 | 179512746 | 179754841 | PEX5L    |
| ENSG00000114767 | 9.100750797 | 8.736113084 | protein_coding | 3 | 51967446  | 51975957  | RRP9     |
| ENSG00000114770 | 9.175868488 | 9.395168311 | protein_coding | 3 | 183637722 | 183735803 | ABCC5    |
| ENSG00000114771 | 3.393122761 | 0           | protein_coding | 3 | 151531825 | 151546272 | AADAC    |
| ENSG00000114779 | 8.53489446  | 8.32500368  | protein_coding | 3 | 52002526  | 52017425  | ABHD14B  |
| ENSG00000114784 | 7.308035767 | 7.519971735 | protein_coding | 3 | 40351175  | 40353915  | EIF1B    |
| ENSG00000114786 | 0.869158192 | 1.925536307 | protein_coding | 3 | 52009066  | 52023199  |          |
| ENSG00000114790 | 3.077135474 | 2.579085888 | protein_coding | 3 | 153838792 | 153975616 | ARHGEF26 |
| ENSG00000114796 | 7.182306324 | 7.791043682 | protein_coding | 3 | 183353356 | 183398733 | KLHL24   |
| ENSG00000114805 | 0.499066092 | 0.697730409 | protein_coding | 3 | 155093369 | 155462856 | PLCH1    |
| ENSG00000114812 | 2.238690726 | 1.925536307 | protein_coding | 3 | 42530791  | 42579059  | VIPR1    |
| ENSG00000114841 | 7.15746161  | 7.41347308  | protein_coding | 3 | 52350335  | 52434507  | DNAH1    |
| ENSG00000114850 | 10.9593005  | 10.88880815 | protein_coding | 3 | 156257929 | 156272973 | SSR3     |
| ENSG00000114853 | 7.680671792 | 8.206984494 | protein_coding | 3 | 42695176  | 42709072  | ZBTB47   |
| ENSG00000114854 | 0.869158192 | 1.16600992  | protein_coding | 3 | 52485118  | 52488086  | TNNC1    |
| ENSG00000114857 | 9.497916256 | 9.791222404 | protein_coding | 3 | 42642106  | 42690227  | NKTR     |
| ENSG00000114859 | 6.835971536 | 6.084484284 | protein_coding | 3 | 184063973 | 184079439 | CLCN2    |
| ENSG00000114861 | 9.24628631  | 8.963424725 | protein_coding | 3 | 71003844  | 71633140  | FOXP1    |
| ENSG00000114867 | 13.3821508  | 12.99210928 | protein_coding | 3 | 184032283 | 184053146 | EIF4G1   |
| ENSG00000114902 | 9.001868107 | 9.161316205 | protein_coding | 3 | 52738971  | 52742182  | SPCS1    |
| ENSG00000114904 | 7.437505974 | 7.572769481 | protein_coding | 3 | 52744800  | 52804965  | NEK4     |
| ENSG00000114923 | 6.35766608  | 4.872768657 | protein_coding | 2 | 220492049 | 220506702 | SLC4A3   |
| ENSG00000114933 | 7.72925009  | 7.641787375 | protein_coding | 2 | 206858445 | 206951027 | INO80D   |
| ENSG00000114942 | 9.981711773 | 10.26660082 | protein_coding | 2 | 207024309 | 207027652 | EEF1B2   |
| ENSG00000114956 | 8.251597515 | 8.278081046 | protein_coding | 2 | 74153953  | 74186088  | DGUOK    |
| ENSG00000114978 | 8.954578658 | 8.753889302 | protein_coding | 2 | 74382165  | 74406025  | MOB1A    |
| ENSG00000114982 | 9.420848964 | 9.401152631 | protein_coding | 2 | 97258907  | 97308524  | KANSL3   |
| ENSG00000114988 | 8.675694252 | 8.83570377  | protein_coding | 2 | 97371666  | 97405801  | LMAN2L   |
| ENSG00000114993 | 8.698837588 | 8.595894166 | protein_coding | 2 | 74652963  | 74669549  | RTKN     |
| ENSG00000114999 | 10.08688122 | 9.730200815 | protein_coding | 2 | 113239731 | 113290227 | TTL      |
| ENSG00000115008 | 5.695874189 | 4.319727133 | protein_coding | 2 | 113531492 | 113542167 | IL1A     |
| ENSG00000115009 | 6.290697143 | 5.456629825 | protein_coding | 2 | 228678558 | 228682272 | CCL20    |
| ENSG00000115020 | 8.783815073 | 8.401295742 | protein_coding | 2 | 209130991 | 209223475 | PIKFYVE  |
| ENSG00000115041 | 6.579622637 | 5.47691899  | protein_coding | 2 | 95963052  | 96051825  | KCNIP3   |
| ENSG00000115042 | 7.789781675 | 7.716212954 | protein_coding | 2 | 96068469  | 96082364  | FAHD2A   |
| ENSG00000115053 | 13.74686114 | 13.27940439 | protein_coding | 2 | 232318242 | 232348352 | NCL      |
| ENSG00000115073 | 9.53937307  | 9.396500307 | protein_coding | 2 | 98272431  | 98280570  | ACTR1B   |
| ENSG00000115084 | 8.66984994  | 8.417132063 | protein_coding | 2 | 114462588 | 114514400 | SLC35F5  |
| ENSG00000115085 | 0.869158192 | 1.802319292 | protein_coding | 2 | 98330023  | 98356325  | ZAP70    |
| ENSG00000115091 | 11.28114357 | 11.20194453 | protein_coding | 2 | 114647537 | 114720173 | ACTR3    |
| ENSG00000115107 | 10.19307491 | 9.760517066 | protein_coding | 2 | 119981384 | 120023228 | STEAP3   |
| ENSG00000115109 | 7.481543613 | 7.48283249  | protein_coding | 2 | 120770581 | 120936695 | EPB41L5  |
| ENSG00000115112 | 7.824391858 | 6.624193585 | protein_coding | 2 | 121974163 | 122042783 | TFCP2L1  |
| ENSG00000115128 | 8.959377969 | 8.896276962 | protein_coding | 2 | 24290454  | 24299313  |          |
| ENSG00000115129 | 7.058051099 | 7.405556541 | protein_coding | 2 | 24300303  | 24308731  | TP53I3   |
| ENSG00000115137 | 5.346128795 | 5.404622322 | protein_coding | 2 | 25166505  | 25194963  | DNAJC27  |
| ENSG00000115145 | 8.154494062 | 7.817139602 | protein_coding | 2 | 152973315 | 153032506 | STAM2    |
| ENSG00000115155 | 0           | 0.697730409 | protein_coding | 2 | 26680071  | 26781566  | OTOF     |
| ENSG00000115159 | 9.111570361 | 8.605140645 | protein_coding | 2 | 157291802 | 157470247 | GPD2     |
| ENSG00000115163 | 7.813830732 | 8.235547225 | protein_coding | 2 | 26987157  | 27023935  | CENPA    |
| ENSG00000115165 | 0           | 1.353254395 | protein_coding | 2 | 158271131 | 158345473 | CYTIP    |



|                 |             |             |                |    |           |           |         |
|-----------------|-------------|-------------|----------------|----|-----------|-----------|---------|
| ENSG00000115170 | 7.888702948 | 7.950075687 | protein_coding | 2  | 158592958 | 158732374 | ACVR1   |
| ENSG00000115183 | 9.478823042 | 9.219670215 | protein_coding | 2  | 159825146 | 160089170 | TANC1   |
| ENSG00000115194 | 3.077135474 | 2.652276565 | protein_coding | 2  | 27476552  | 27498685  | SLC30A3 |
| ENSG00000115204 | 9.024943975 | 9.493672366 | protein_coding | 2  | 27532360  | 27548547  | MPV17   |
| ENSG00000115207 | 9.859309406 | 9.716934393 | protein_coding | 2  | 27548716  | 27579868  | GTF3C2  |
| ENSG00000115211 | 8.004679484 | 8.541545191 | protein_coding | 2  | 27587219  | 27593353  | EIF2B4  |
| ENSG00000115216 | 10.47906555 | 11.19066403 | protein_coding | 2  | 27650657  | 27665126  | NRBP1   |
| ENSG00000115221 | 6.693459083 | 1.925536307 | protein_coding | 2  | 160956177 | 161128399 | ITGB6   |
| ENSG00000115226 | 4.19837882  | 2.334191469 | protein_coding | 2  | 27714750  | 27718112  | FNDC4   |
| ENSG00000115233 | 10.25342625 | 10.21468926 | protein_coding | 2  | 162164549 | 162268228 | PSMD14  |
| ENSG00000115234 | 10.55355859 | 10.49547112 | protein_coding | 2  | 27593389  | 27599995  | SNX17   |
| ENSG00000115239 | 6.681890601 | 6.610484676 | protein_coding | 2  | 53759810  | 54087297  | ASB3    |
| ENSG00000115241 | 11.44943256 | 11.50411343 | protein_coding | 2  | 27604061  | 27632554  | PPM1G   |
| ENSG00000115252 | 0           | 0.390640832 | protein_coding | 2  | 183004763 | 183387919 | PDE1A   |
| ENSG00000115255 | 8.467429577 | 8.106387334 | protein_coding | 19 | 1491023   | 1497926   | REEP6   |
| ENSG00000115257 | 6.163378456 | 6.827478203 | protein_coding | 19 | 1481427   | 1490407   | PCSK4   |
| ENSG00000115266 | 7.527512071 | 7.492830145 | protein_coding | 19 | 1450148   | 1473243   | APC2    |
| ENSG00000115267 | 8.088119026 | 8.595894166 | protein_coding | 2  | 163123589 | 163175213 | IFIH1   |
| ENSG00000115268 | 11.48148243 | 11.70305416 | protein_coding | 19 | 1438363   | 1440492   | RPS15   |
| ENSG00000115271 | 6.975172889 | 6.737844962 | protein_coding | 2  | 163175350 | 163228105 | GCA     |
| ENSG00000115274 | 7.726437377 | 7.987679908 | protein_coding | 2  | 74682150  | 74688011  | INO80B  |
| ENSG00000115275 | 9.931305133 | 10.2460598  | protein_coding | 2  | 74688184  | 74692537  | MOGS    |
| ENSG00000115282 | 7.842689815 | 8.262094789 | protein_coding | 2  | 74710200  | 74722013  | TTC31   |
| ENSG00000115286 | 8.505663452 | 8.854241196 | protein_coding | 19 | 1383526   | 1395587   | NDUFS7  |
| ENSG00000115289 | 7.102117104 | 7.343375265 | protein_coding | 2  | 74732170  | 74735707  | PCGF1   |
| ENSG00000115290 | 3.652182994 | 2.912743273 | protein_coding | 2  | 165349322 | 165478358 | GRB14   |
| ENSG00000115295 | 8.889432943 | 9.089837938 | protein_coding | 2  | 29320560  | 29412509  | CLIP4   |
| ENSG00000115297 | 0.869158192 | 2.420525079 | protein_coding | 2  | 74740590  | 74744769  | TLX2    |
| ENSG00000115306 | 12.29788714 | 12.3953757  | protein_coding | 2  | 54683422  | 54896812  | SPTBN1  |
| ENSG00000115307 | 9.660729799 | 10.10775128 | protein_coding | 2  | 74753772  | 74757066  | AUP1    |
| ENSG00000115310 | 11.3772983  | 11.30235327 | protein_coding | 2  | 55199325  | 55339757  | RTN4    |
| ENSG00000115317 | 7.537174746 | 7.679480043 | protein_coding | 2  | 74756504  | 74760472  | HTRA2   |
| ENSG00000115318 | 4.517578978 | 4.406904905 | protein_coding | 2  | 74759541  | 74782817  | LOXL3   |
| ENSG00000115325 | 6.129712275 | 5.734544355 | protein_coding | 2  | 74776153  | 74784681  | DOK1    |
| ENSG00000115339 | 7.997697782 | 5.792353798 | protein_coding | 2  | 166604101 | 166651192 | GALNT3  |
| ENSG00000115350 | 7.765324926 | 8.345837872 | protein_coding | 2  | 75185619  | 75197255  | POLE4   |
| ENSG00000115353 | 0           | 0.390640832 | protein_coding | 2  | 75276231  | 75426826  | TACR1   |
| ENSG00000115355 | 9.337589303 | 9.169909673 | protein_coding | 2  | 55514978  | 55647057  | CCDC88A |
| ENSG00000115363 | 5.141750194 | 3.87606762  | protein_coding | 2  | 75696428  | 75796848  | FAM176A |
| ENSG00000115364 | 8.436784206 | 8.744505654 | protein_coding | 2  | 75873909  | 75917977  | MRPL19  |
| ENSG00000115365 | 8.98077946  | 8.770422115 | protein_coding | 2  | 211295973 | 211342376 | LANCL1  |
| ENSG00000115368 | 9.242353704 | 9.273582355 | protein_coding | 2  | 190306159 | 190340291 | WDR75   |
| ENSG00000115380 | 9.510233586 | 10.07318632 | protein_coding | 2  | 56093102  | 56151274  | EFEMP1  |
| ENSG00000115392 | 6.528867325 | 7.070480904 | protein_coding | 2  | 58386378  | 58468507  | FANCL   |
| ENSG00000115414 | 12.83707757 | 13.25762674 | protein_coding | 2  | 216225163 | 216300895 | FN1     |
| ENSG00000115415 | 10.49526681 | 10.83234969 | protein_coding | 2  | 191829084 | 191885686 | STAT1   |
| ENSG00000115419 | 10.96676801 | 10.42966183 | protein_coding | 2  | 191745553 | 191830278 | GLS     |
| ENSG00000115421 | 7.202688343 | 7.148445524 | protein_coding | 2  | 60983365  | 61029220  | PAPOLG  |
| ENSG00000115423 | 0.869158192 | 2.144285137 | protein_coding | 2  | 84743579  | 85046713  | DNAH6   |
| ENSG00000115425 | 5.637181576 | 5.004391715 | protein_coding | 2  | 216861052 | 216947678 | PECR    |
| ENSG00000115446 | 7.68357507  | 7.652976045 | protein_coding | 2  | 99225042  | 99234978  | UNC50   |
| ENSG00000115457 | 3.603959378 | 2.501982735 | protein_coding | 2  | 217497551 | 217529159 | IGFBP2  |
| ENSG00000115459 | 7.726437377 | 8.027771115 | protein_coding | 2  | 85581517  | 85618875  | ELMOD3  |
| ENSG00000115461 | 2.57521082  | 2.788380093 | protein_coding | 2  | 217536828 | 217560248 | IGFBP5  |
| ENSG00000115464 | 9.990530519 | 10.27023828 | protein_coding | 2  | 61414591  | 61697904  | USP34   |
| ENSG00000115468 | 2.57521082  | 1.353254395 | protein_coding | 2  | 233470767 | 233547491 | EFHD1   |
| ENSG00000115474 | 1.407729925 | 0.697730409 | protein_coding | 2  | 233631174 | 233641278 | KCNJ13  |
| ENSG00000115484 | 11.02829989 | 10.99528021 | protein_coding | 2  | 62095224  | 62115939  | CCT4    |
| ENSG00000115486 | 8.901951857 | 9.104582717 | protein_coding | 2  | 85774743  | 85788670  | GGCX    |
| ENSG00000115504 | 8.324088959 | 8.282410365 | protein_coding | 2  | 62900986  | 63273622  | EHBP1   |
| ENSG00000115507 | 5.695874189 | 4.640685763 | protein_coding | 2  | 63277192  | 63284971  | OTX1    |
| ENSG00000115514 | 7.967047117 | 7.827052132 | protein_coding | 2  | 99921090  | 99957165  | TXNDC9  |
| ENSG00000115520 | 7.878603882 | 7.266786485 | protein_coding | 2  | 198318147 | 198340032 | COQ10B  |

|                 |             |             |                |    |           |           |          |
|-----------------|-------------|-------------|----------------|----|-----------|-----------|----------|
| ENSG00000115524 | 11.43378338 | 11.3074958  | protein_coding | 2  | 198256698 | 198299815 | SF3B1    |
| ENSG00000115525 | 5.191549282 | 4.710890357 | protein_coding | 2  | 86066267  | 86116137  | ST3GAL5  |
| ENSG00000115539 | 6.92698535  | 6.923001245 | protein_coding | 2  | 101179152 | 101193197 | PDCL3    |
| ENSG00000115540 | 8.292108003 | 7.852510423 | protein_coding | 2  | 198380295 | 198418423 | MOB4     |
| ENSG00000115541 | 9.305909516 | 9.379087693 | protein_coding | 2  | 198364718 | 198368181 | HSPE1    |
| ENSG00000115548 | 9.207478296 | 9.693285025 | protein_coding | 2  | 86667770  | 86719839  | KDM3A    |
| ENSG00000115556 | 6.998676229 | 6.742042315 | protein_coding | 2  | 219472488 | 219501907 | PLCD4    |
| ENSG00000115561 | 10.08248848 | 10.13434017 | protein_coding | 2  | 86730554  | 86948245  | CHMP3    |
| ENSG00000115568 | 8.986668406 | 8.786767612 | protein_coding | 2  | 219502639 | 219524378 | ZNF142   |
| ENSG00000115590 | 0.869158192 | 0           | protein_coding | 2  | 102608306 | 102645006 | IL1R2    |
| ENSG00000115592 | 0.869158192 | 0.697730409 | protein_coding | 2  | 219687106 | 219696809 | PRKAG3   |
| ENSG00000115594 | 8.150302734 | 7.10998981  | protein_coding | 2  | 102681004 | 102796334 | IL1R1    |
| ENSG00000115596 | 0.499066092 | 1.16600992  | protein_coding | 2  | 219724544 | 219738955 | WNT6     |
| ENSG00000115598 | 3.004694206 | 1.667587519 | protein_coding | 2  | 102803433 | 102856462 | IL1RL2   |
| ENSG00000115602 | 3.211941663 | 0.390640832 | protein_coding | 2  | 102927962 | 102968497 | IL1RL1   |
| ENSG00000115604 | 5.60078458  | 5.09905904  | protein_coding | 2  | 102927989 | 103015218 | IL18R1   |
| ENSG00000115607 | 0           | 0.390640832 | protein_coding | 2  | 103035149 | 103069025 | IL18RAP  |
| ENSG00000115616 | 1.616589159 | 1.518964905 | protein_coding | 2  | 103236166 | 103327777 | SLC9A2   |
| ENSG00000115641 | 7.834876234 | 4.319727133 | protein_coding | 2  | 105974169 | 106054960 | FHL2     |
| ENSG00000115648 | 8.175269974 | 7.284161038 | protein_coding | 2  | 238394071 | 238463961 | MLPH     |
| ENSG00000115649 | 8.940084182 | 9.012896966 | protein_coding | 2  | 220036619 | 220042828 | CNPPD1   |
| ENSG00000115652 | 9.694224448 | 9.528108569 | protein_coding | 2  | 106709759 | 106810795 | UXS1     |
| ENSG00000115657 | 5.729976786 | 5.871116342 | protein_coding | 2  | 220074490 | 220083712 | ABCB6    |
| ENSG00000115661 | 7.876068031 | 7.86795666  | protein_coding | 2  | 220110177 | 220115059 | STK16    |
| ENSG00000115677 | 13.5663983  | 13.09629528 | protein_coding | 2  | 242166679 | 242256476 | HDLBP    |
| ENSG00000115685 | 9.052156467 | 8.899098923 | protein_coding | 2  | 242088991 | 242123067 | PPP1R7   |
| ENSG00000115687 | 8.105542576 | 7.772696723 | protein_coding | 2  | 242045514 | 242089679 | PASK     |
| ENSG00000115694 | 10.51984191 | 10.26696498 | protein_coding | 2  | 242432089 | 242449145 | STK25    |
| ENSG00000115705 | 0.499066092 | 0.390640832 | protein_coding | 2  | 1377995   | 1547483   | TPO      |
| ENSG00000115718 | 0.499066092 | 1.353254395 | protein_coding | 2  | 128176003 | 128186822 | PROC     |
| ENSG00000115738 | 6.005279909 | 5.018301917 | protein_coding | 2  | 8818975   | 8824583   | ID2      |
| ENSG00000115750 | 7.292905885 | 7.090370599 | protein_coding | 2  | 9983483   | 10074537  | TAF1B    |
| ENSG00000115756 | 10.84692499 | 9.901814226 | protein_coding | 2  | 10443015  | 10567743  | HPCAL1   |
| ENSG00000115758 | 10.95269697 | 10.6241267  | protein_coding | 2  | 10580094  | 10588630  | ODC1     |
| ENSG00000115760 | 9.988771077 | 10.12834013 | protein_coding | 2  | 32582096  | 32843966  | BIRC6    |
| ENSG00000115761 | 8.75235931  | 8.554729165 | protein_coding | 2  | 10710892  | 10830101  | NOL10    |
| ENSG00000115762 | 10.50103856 | 10.16748693 | protein_coding | 2  | 131862420 | 132111282 | PLEKHB2  |
| ENSG00000115806 | 10.36794799 | 10.314597   | protein_coding | 2  | 171784974 | 171823639 | GORASP2  |
| ENSG00000115808 | 8.646233023 | 8.560682282 | protein_coding | 2  | 37070783  | 37193615  | STRN     |
| ENSG00000115816 | 9.223526019 | 9.509147322 | protein_coding | 2  | 37428755  | 37458856  | CEBPZ    |
| ENSG00000115825 | 9.222528249 | 9.570029165 | protein_coding | 2  | 37477645  | 37551951  | PRKD3    |
| ENSG00000115827 | 7.969428119 | 7.768587741 | protein_coding | 2  | 172290727 | 172341562 | DCAF17   |
| ENSG00000115828 | 1.616589159 | 1.667587519 | protein_coding | 2  | 37571717  | 37600465  | QPCT     |
| ENSG00000115839 | 9.488816239 | 9.380434611 | protein_coding | 2  | 135809835 | 135933964 | RAB3GAP1 |
| ENSG00000115840 | 8.261346552 | 8.015686953 | protein_coding | 2  | 172640880 | 172864766 | SLC25A12 |
| ENSG00000115841 | 4.568725997 | 4.604259349 | protein_coding | 2  | 38150330  | 38294285  | FAM82A1  |
| ENSG00000115844 | 6.138202758 | 5.200150955 | protein_coding | 2  | 172964167 | 172967628 | DLX2     |
| ENSG00000115850 | 1.407729925 | 0.950786998 | protein_coding | 2  | 136545410 | 136594750 | LCT      |
| ENSG00000115866 | 9.950715896 | 9.821287826 | protein_coding | 2  | 136664247 | 136743670 | DARS     |
| ENSG00000115875 | 10.48073561 | 10.84386835 | protein_coding | 2  | 38970741  | 38978636  | SRSF7    |
| ENSG00000115884 | 10.89718911 | 9.875309148 | protein_coding | 2  | 20400558  | 20425194  | SDC1     |
| ENSG00000115896 | 0           | 1.16600992  | protein_coding | 2  | 198669426 | 199437305 | PLCL1    |
| ENSG00000115902 | 7.633406721 | 8.657187659 | protein_coding | 2  | 65215611  | 65250999  | SLC1A4   |
| ENSG00000115904 | 8.950968668 | 9.176127473 | protein_coding | 2  | 39208537  | 39351486  | SOS1     |
| ENSG00000115919 | 9.362260424 | 9.321350625 | protein_coding | 2  | 143635067 | 143799890 | KYNU     |
| ENSG00000115934 | 0.499066092 | 0           | lincRNA        | 12 | 23334268  | 23404433  |          |
| ENSG00000115935 | 2.847891871 | 2.039052734 | protein_coding | 2  | 175424300 | 175547644 | WIPF1    |
| ENSG00000115942 | 8.748205354 | 8.553535588 | protein_coding | 2  | 201773696 | 201828403 | ORC2     |
| ENSG00000115944 | 9.167597433 | 9.602710123 | protein_coding | 2  | 42560686  | 42596150  | COX7A2L  |
| ENSG00000115946 | 7.969428119 | 8.051639961 | protein_coding | 2  | 68384976  | 68403370  | PNO1     |
| ENSG00000115947 | 8.016241092 | 7.915187059 | protein_coding | 2  | 148691732 | 148779147 | ORC4     |
| ENSG00000115956 | 0           | 0.390640832 | protein_coding | 2  | 68592305  | 68624585  | PLEK     |
| ENSG00000115963 | 9.965104479 | 9.806834418 | protein_coding | 2  | 151324709 | 151395525 | RND3     |

|                 |             |             |                |    |           |           |          |
|-----------------|-------------|-------------|----------------|----|-----------|-----------|----------|
| ENSG00000115966 | 9.232475031 | 8.990138507 | protein_coding | 2  | 175936978 | 176033110 | ATF2     |
| ENSG00000115970 | 8.894453552 | 8.867749534 | protein_coding | 2  | 43393800  | 43823185  | THADA    |
| ENSG00000115977 | 6.598204782 | 6.615068802 | protein_coding | 2  | 69688532  | 69901481  | AAK1     |
| ENSG00000115993 | 9.392739397 | 9.250933796 | protein_coding | 2  | 202241930 | 202316334 | TRAK2    |
| ENSG00000115998 | 6.023726639 | 6.515603638 | protein_coding | 2  | 70377012  | 70475747  | C2orf42  |
| ENSG00000116001 | 8.579219424 | 8.985720419 | protein_coding | 2  | 70436576  | 70475792  | TIA1     |
| ENSG00000116005 | 8.97959878  | 8.76733661  | protein_coding | 2  | 70484518  | 70508323  | PCYOX1   |
| ENSG00000116016 | 11.0365554  | 11.09463689 | protein_coding | 2  | 46520806  | 46613836  | EPAS1    |
| ENSG00000116017 | 4.097495944 | 4.127774132 | protein_coding | 19 | 926037    | 972781    | ARID3A   |
| ENSG00000116030 | 9.834054211 | 9.764133213 | protein_coding | 2  | 203070903 | 203103331 | SUMO1    |
| ENSG00000116031 | 0.499066092 | 1.353254395 | protein_coding | 2  | 71057347  | 71062952  | CD207    |
| ENSG00000116032 | 2.762599152 | 2.242360793 | protein_coding | 19 | 1000418   | 1009731   | GRIN3B   |
| ENSG00000116035 | 4.131913373 | 4.489113623 | protein_coding | 2  | 71127720  | 71160576  | VAX2     |
| ENSG00000116039 | 4.261916566 | 4.448594745 | protein_coding | 2  | 71163012  | 71192555  | ATP6V1B1 |
| ENSG00000116044 | 10.34015849 | 10.08190551 | protein_coding | 2  | 178092323 | 178257425 | NFE2L2   |
| ENSG00000116062 | 10.43020521 | 10.67220966 | protein_coding | 2  | 48010221  | 48034092  | MSH6     |
| ENSG00000116095 | 7.262161623 | 7.258020107 | protein_coding | 2  | 179345195 | 179370093 | PLEKHA3  |
| ENSG00000116096 | 8.006999229 | 8.015686953 | protein_coding | 2  | 73114489  | 73119287  | SPR      |
| ENSG00000116106 | 3.335220907 | 3.027231696 | protein_coding | 2  | 222282747 | 222438922 | EPHA4    |
| ENSG00000116117 | 3.393122761 | 5.22435463  | protein_coding | 2  | 205410516 | 206484886 | PARD3B   |
| ENSG00000116120 | 9.930694319 | 9.628445484 | protein_coding | 2  | 223435255 | 223521056 | FARSB    |
| ENSG00000116127 | 8.380642463 | 8.736113084 | protein_coding | 2  | 73612886  | 73837920  | ALMS1    |
| ENSG00000116128 | 9.3522601   | 8.976843446 | protein_coding | 1  | 147013182 | 147098017 | BCL9     |
| ENSG00000116132 | 0.869158192 | 1.518964905 | protein_coding | 1  | 170631869 | 170708560 | PRRX1    |
| ENSG00000116133 | 11.69705415 | 10.81601773 | protein_coding | 1  | 55315300  | 55352921  | DHCR24   |
| ENSG00000116138 | 7.68357507  | 7.795089291 | protein_coding | 1  | 15853308  | 15918874  | DNAJC16  |
| ENSG00000116141 | 0.499066092 | 0.390640832 | protein_coding | 1  | 220701568 | 220837803 | MARN1    |
| ENSG00000116151 | 5.575999561 | 5.953060722 | protein_coding | 1  | 2252692   | 2323146   | MORN1    |
| ENSG00000116157 | 0           | 0.390640832 | protein_coding | 1  | 53068044  | 53074723  | GPX7     |
| ENSG00000116161 | 8.552470601 | 9.162882465 | protein_coding | 1  | 174968300 | 174980851 | CACYBP   |
| ENSG00000116171 | 8.611591722 | 8.861975727 | protein_coding | 1  | 53392901  | 53517375  | SCP2     |
| ENSG00000116176 | 5.458875168 | 7.449853178 | protein_coding | 16 | 1271651   | 1275257   | TPSG1    |
| ENSG00000116183 | 2.471521042 | 5.339632724 | protein_coding | 1  | 176432307 | 176814735 | PAPPA2   |
| ENSG00000116191 | 8.090308512 | 7.836897019 | protein_coding | 1  | 178694300 | 179065553 | RALGPS2  |
| ENSG00000116194 | 1.16343121  | 0.950786998 | protein_coding | 1  | 178818840 | 178840187 | ANGPTL1  |
| ENSG00000116198 | 8.713115882 | 8.714915547 | protein_coding | 1  | 3728645   | 3773778   | CEP104   |
| ENSG00000116199 | 9.294560225 | 9.406451268 | protein_coding | 1  | 178994939 | 179045697 | FAM20B   |
| ENSG00000116205 | 6.236372259 | 6.419292172 | protein_coding | 1  | 54519260  | 54578192  | TCEANC2  |
| ENSG00000116209 | 9.015757872 | 9.652615414 | protein_coding | 1  | 54497347  | 54519177  | TMEM59   |
| ENSG00000116212 | 8.489164384 | 8.423679567 | protein_coding | 1  | 54411750  | 54433841  | LRRC42   |
| ENSG00000116213 | 8.023133844 | 8.237034976 | protein_coding | 1  | 3547331   | 3569325   | WRAP73   |
| ENSG00000116221 | 10.15121608 | 9.991366237 | protein_coding | 1  | 54649714  | 54686603  | MRPL37   |
| ENSG00000116237 | 10.14648923 | 10.1891691  | protein_coding | 1  | 6281252   | 6296032   | ICMT     |
| ENSG00000116251 | 9.9233443   | 10.2911566  | protein_coding | 1  | 6241329   | 6269449   | RPL22    |
| ENSG00000116254 | 3.393122761 | 5.271576845 | protein_coding | 1  | 6161853   | 6240183   | CHD5     |
| ENSG00000116260 | 11.1012235  | 11.71244306 | protein_coding | 1  | 180123969 | 180173165 | QSOX1    |
| ENSG00000116266 | 7.91858278  | 8.349968848 | protein_coding | 1  | 109289296 | 109352148 | STXBP3   |
| ENSG00000116273 | 7.89873181  | 7.817139602 | protein_coding | 1  | 6673745   | 6684093   | PHF13    |
| ENSG00000116285 | 11.00004714 | 10.55304383 | protein_coding | 1  | 8064464   | 8086368   | ERRF1    |
| ENSG00000116288 | 10.12208492 | 10.67165966 | protein_coding | 1  | 8014351   | 8045565   | PARK7    |
| ENSG00000116299 | 3.911897206 | 4.15321211  | protein_coding | 1  | 109656301 | 109749401 | KIAA1324 |
| ENSG00000116337 | 9.600559263 | 9.580614711 | protein_coding | 1  | 110158726 | 110174673 | AMPD2    |
| ENSG00000116350 | 9.832093067 | 9.942049496 | protein_coding | 1  | 29474255  | 29508499  | SRSF4    |
| ENSG00000116353 | 8.237837231 | 8.279525596 | protein_coding | 1  | 29519385  | 29557454  | MECR     |
| ENSG00000116396 | 5.729976786 | 5.709041716 | protein_coding | 1  | 110753965 | 110825722 | KCNC4    |
| ENSG00000116406 | 8.893200037 | 9.272857279 | protein_coding | 1  | 184659637 | 184724047 | EDEM3    |
| ENSG00000116455 | 8.135536446 | 8.308116953 | protein_coding | 1  | 111982512 | 111991998 | WDR77    |
| ENSG00000116459 | 9.794987046 | 10.08768916 | protein_coding | 1  | 111991486 | 112005395 | ATP5F1   |
| ENSG00000116473 | 8.579219424 | 8.305283181 | protein_coding | 1  | 112084840 | 112259313 | RAP1A    |
| ENSG00000116478 | 10.27283443 | 10.24384153 | protein_coding | 1  | 32757687  | 32799236  | HDAC1    |
| ENSG00000116489 | 10.627035   | 10.45481329 | protein_coding | 1  | 113161795 | 113214241 | CAPZA1   |
| ENSG00000116497 | 7.491518048 | 7.924450389 | protein_coding | 1  | 33282368  | 33324476  | S100BPB  |
| ENSG00000116514 | 8.14188337  | 7.70765368  | protein_coding | 1  | 33402046  | 33430286  | RNF19B   |

|                 |             |             |                |   |           |           |          |
|-----------------|-------------|-------------|----------------|---|-----------|-----------|----------|
| ENSG00000116521 | 10.30947573 | 10.60322483 | protein_coding | 1 | 155225770 | 155232221 | SCAMP3   |
| ENSG00000116525 | 6.005279909 | 5.383282767 | protein_coding | 1 | 33611003  | 33647671  | TRIM62   |
| ENSG00000116539 | 9.709260716 | 9.811335474 | protein_coding | 1 | 155305059 | 155532598 | ASH1L    |
| ENSG00000116544 | 0.499066092 | 0.950786998 | protein_coding | 1 | 35331037  | 35395186  | DLGAP3   |
| ENSG00000116560 | 11.87157285 | 11.63231638 | protein_coding | 1 | 35641979  | 35658749  | SFPQ     |
| ENSG00000116574 | 6.738827102 | 7.625976011 | protein_coding | 1 | 228870824 | 228882416 | RHOU     |
| ENSG00000116580 | 9.108333003 | 9.145559356 | protein_coding | 1 | 155719508 | 155829191 | GON4L    |
| ENSG00000116584 | 10.92597637 | 11.50349546 | protein_coding | 1 | 155916645 | 155966129 | ARHGEF2  |
| ENSG00000116586 | 8.146099194 | 8.310945169 | protein_coding | 1 | 156024543 | 156028301 | LAMTOR2  |
| ENSG00000116604 | 10.07310926 | 9.921840881 | protein_coding | 1 | 156433519 | 156470620 | MEF2D    |
| ENSG00000116641 | 8.678607554 | 9.151882762 | protein_coding | 1 | 62920399  | 63153969  | DOCK7    |
| ENSG00000116649 | 10.76466124 | 10.77128306 | protein_coding | 1 | 11114641  | 11120081  | SRM      |
| ENSG00000116652 | 0.869158192 | 0.697730409 | protein_coding | 1 | 64014635  | 64015911  | DLEU2L   |
| ENSG00000116661 | 8.373468605 | 7.805153958 | protein_coding | 1 | 11708424  | 11715842  | FBXO2    |
| ENSG00000116663 | 6.014532757 | 5.506827567 | protein_coding | 1 | 11724181  | 11734411  | FBXO6    |
| ENSG00000116667 | 6.005279909 | 6.130036786 | protein_coding | 1 | 184356192 | 184598154 | C1orf21  |
| ENSG00000116668 | 5.207774174 | 5.526427614 | protein_coding | 1 | 185126212 | 185260897 | SWT1     |
| ENSG00000116670 | 8.879339004 | 8.638170933 | protein_coding | 1 | 11734538  | 11751707  | MAD2L2   |
| ENSG00000116675 | 6.305850085 | 6.382123086 | protein_coding | 1 | 65713902  | 65881552  | DNAJC6   |
| ENSG00000116678 | 5.124761037 | 4.468996429 | protein_coding | 1 | 65886248  | 66107242  | LEPR     |
| ENSG00000116679 | 9.003030709 | 9.435898843 | protein_coding | 1 | 185265520 | 185286461 | IVNS1ABP |
| ENSG00000116685 | 9.199386995 | 9.141593107 | protein_coding | 1 | 11979648  | 11986485  | KIAA2013 |
| ENSG00000116688 | 10.55593704 | 10.60926879 | protein_coding | 1 | 12040238  | 12073571  | MFN2     |
| ENSG00000116690 | 1.16343121  | 1.667587519 | protein_coding | 1 | 186265405 | 186283694 | PRG4     |
| ENSG00000116691 | 8.247679379 | 8.322202916 | protein_coding | 1 | 12079523  | 12092102  | MIIP     |
| ENSG00000116698 | 10.33877788 | 10.17759419 | protein_coding | 1 | 183441351 | 183567381 | SMG7     |
| ENSG00000116701 | 4.999881834 | 4.604259349 | protein_coding | 1 | 183524698 | 183560011 | NCF2     |
| ENSG00000116703 | 0.499066092 | 0.390640832 | protein_coding | 1 | 186412698 | 186430254 | PDC      |
| ENSG00000116704 | 7.246540262 | 7.621426466 | protein_coding | 1 | 67465015  | 67519782  | SLC35D1  |
| ENSG00000116711 | 2.35979773  | 3.993387124 | protein_coding | 1 | 186798085 | 186958113 | PLA2G4A  |
| ENSG00000116717 | 9.75690141  | 9.395834462 | protein_coding | 1 | 68150744  | 68154021  | GADD45A  |
| ENSG00000116729 | 8.915598341 | 9.089837938 | protein_coding | 1 | 68564142  | 68698803  | WLS      |
| ENSG00000116731 | 8.322227223 | 8.293892101 | protein_coding | 1 | 14026693  | 14151560  | PRDM2    |
| ENSG00000116741 | 4.75690578  | 3.570966319 | protein_coding | 1 | 192778169 | 192781403 | RGS2     |
| ENSG00000116745 | 3.335220907 | 0           | protein_coding | 1 | 68894505  | 68915642  | RPE65    |
| ENSG00000116747 | 8.508940744 | 8.624594823 | protein_coding | 1 | 193028552 | 193060907 | TROVE2   |
| ENSG00000116748 | 0           | 0.390640832 | protein_coding | 1 | 115215719 | 115238239 | AMPD1    |
| ENSG00000116750 | 8.659565077 | 8.806942451 | protein_coding | 1 | 192984889 | 193029237 | UCHL5    |
| ENSG00000116752 | 7.940593421 | 8.38394126  | protein_coding | 1 | 115110178 | 115124260 | BCAS2    |
| ENSG00000116754 | 10.57012597 | 10.96012994 | protein_coding | 1 | 70671365  | 70718735  | SRSF11   |
| ENSG00000116761 | 6.462804234 | 6.716673044 | protein_coding | 1 | 70876901  | 70905534  | CTH      |
| ENSG00000116771 | 5.316509574 | 4.777836593 | protein_coding | 1 | 15898848  | 15911605  | AGMAT    |
| ENSG00000116774 | 5.431503808 | 6.287656023 | protein_coding | 1 | 114522063 | 114524876 | OLFML3   |
| ENSG00000116785 | 0.869158192 | 0           | protein_coding | 1 | 196743925 | 196764536 | CFHR3    |
| ENSG00000116786 | 9.886021803 | 10.00452874 | protein_coding | 1 | 16010827  | 16061264  | PLEKHM2  |
| ENSG00000116791 | 6.716321419 | 6.480864016 | protein_coding | 1 | 75171170  | 75199092  | CRYZ     |
| ENSG00000116793 | 8.018542337 | 8.496293532 | protein_coding | 1 | 114234854 | 114302111 | PHTF1    |
| ENSG00000116809 | 8.135536446 | 8.503728743 | protein_coding | 1 | 16268364  | 16302627  | ZBTB17   |
| ENSG00000116815 | 6.554468172 | 7.188980716 | protein_coding | 1 | 117057157 | 117113661 | CD58     |
| ENSG00000116819 | 4.165528823 | 4.048652948 | protein_coding | 1 | 36038971  | 36060929  | TFAP2E   |
| ENSG00000116830 | 8.929116952 | 8.695567763 | protein_coding | 1 | 117602925 | 117645492 | TF2      |
| ENSG00000116833 | 4.593635215 | 4.42790041  | protein_coding | 1 | 199996730 | 200146552 | NR5A2    |
| ENSG00000116852 | 8.337054268 | 7.724721747 | protein_coding | 1 | 200938520 | 200992828 | KIF21B   |
| ENSG00000116857 | 9.088754802 | 8.913126522 | protein_coding | 1 | 201103900 | 201140702 | TMEM9    |
| ENSG00000116863 | 7.974178365 | 8.393311914 | protein_coding | 1 | 36554476  | 36559533  | ADPRHL2  |
| ENSG00000116871 | 10.65577847 | 10.75553892 | protein_coding | 1 | 36621180  | 36646450  | MAP7D1   |
| ENSG00000116874 | 7.281453427 | 7.575124073 | protein_coding | 1 | 119573839 | 119683294 | WARS2    |
| ENSG00000116882 | 0           | 0.390640832 | protein_coding | 1 | 119911402 | 119936753 | HAO2     |
| ENSG00000116883 | 5.223818625 | 5.339632724 | protein_coding | 1 | 36789335  | 36794818  |          |
| ENSG00000116885 | 4.962122459 | 5.66550919  | protein_coding | 1 | 36881428  | 36916086  | OSCP1    |
| ENSG00000116898 | 9.36407124  | 9.50483104  | protein_coding | 1 | 36921319  | 36930038  | MRPS15   |
| ENSG00000116903 | 7.95748362  | 7.628245414 | protein_coding | 1 | 231468480 | 231473598 | EXOC8    |
| ENSG00000116906 | 9.193288598 | 9.245770021 | protein_coding | 1 | 231376953 | 231413719 | GNPAT    |

|                 |             |             |                  |   |           |           |            |
|-----------------|-------------|-------------|------------------|---|-----------|-----------|------------|
| ENSG00000116918 | 8.417730894 | 8.262094789 | protein_coding   | 1 | 231664287 | 231702270 | TSNAX      |
| ENSG00000116922 | 6.771940731 | 7.057067116 | protein_coding   | 1 | 38147242  | 38157914  | C1orf109   |
| ENSG00000116954 | 8.105542576 | 8.331981894 | protein_coding   | 1 | 39303870  | 39325495  | RRAGC      |
| ENSG00000116957 | 7.363400307 | 7.67728988  | protein_coding   | 1 | 235530675 | 235612283 | TBCE       |
| ENSG00000116962 | 1.16343121  | 0.697730409 | protein_coding   | 1 | 236139130 | 236228462 | NID1       |
| ENSG00000116977 | 8.239811039 | 8.385283657 | protein_coding   | 1 | 236681300 | 236716281 | LGALS8     |
| ENSG00000116983 | 4.491309013 | 3.608232228 | protein_coding   | 1 | 40144320  | 40157361  | HPCAL4     |
| ENSG00000116984 | 9.545769354 | 9.829200569 | protein_coding   | 1 | 236958581 | 237067281 | MTR        |
| ENSG00000116985 | 6.26766507  | 5.393992    | protein_coding   | 1 | 40222854  | 40254533  | BMP8B      |
| ENSG00000116990 | 3.652182994 | 2.912743273 | protein_coding   | 1 | 40361098  | 40367928  | MYCL1      |
| ENSG00000116991 | 7.026383958 | 7.321103092 | protein_coding   | 1 | 232533711 | 232697304 | SIPA1L2    |
| ENSG00000117000 | 8.199812472 | 8.512355001 | protein_coding   | 1 | 40627045  | 40706593  | RLF        |
| ENSG00000117009 | 1.407729925 | 2.334191469 | protein_coding   | 1 | 241695434 | 241758944 | KMO        |
| ENSG00000117010 | 4.352265886 | 4.841813558 | protein_coding   | 1 | 40997233  | 41013841  | ZNF684     |
| ENSG00000117013 | 5.018397273 | 4.810179682 | protein_coding   | 1 | 41249684  | 41306124  | KCNQ4      |
| ENSG00000117016 | 6.400645076 | 5.6022688   | protein_coding   | 1 | 41086351  | 41131329  | RIMS3      |
| ENSG00000117020 | 7.913645586 | 8.954409067 | protein_coding   | 1 | 243651535 | 244014381 | AKT3       |
| ENSG00000117036 | 8.650690744 | 8.579568843 | protein_coding   | 1 | 157090983 | 157108266 | ETV3       |
| ENSG00000117054 | 8.235860718 | 8.500015927 | protein_coding   | 1 | 76190036  | 76253260  | ACADM      |
| ENSG00000117069 | 0.869158192 | 0.697730409 | protein_coding   | 1 | 77333126  | 77531396  | ST6GALNAC5 |
| ENSG00000117114 | 0.499066092 | 1.353254395 | protein_coding   | 1 | 81771845  | 82458107  | LPHN2      |
| ENSG00000117115 | 5.785082014 | 4.508954154 | protein_coding   | 1 | 17393256  | 17445948  | PADI2      |
| ENSG00000117118 | 9.448421292 | 9.66482659  | protein_coding   | 1 | 17345217  | 17380665  | SDHB       |
| ENSG00000117122 | 5.090170488 | 3.813624741 | protein_coding   | 1 | 17300997  | 17307330  | MFAP2      |
| ENSG00000117133 | 7.881135284 | 8.234057939 | protein_coding   | 1 | 84944942  | 84963473  | RPF1       |
| ENSG00000117139 | 9.441577455 | 9.650384052 | protein_coding   | 1 | 202696526 | 202778598 | KDM5B      |
| ENSG00000117143 | 10.71160242 | 10.85602211 | protein_coding   | 1 | 162531321 | 162569627 | UAP1       |
| ENSG00000117148 | 3.603959378 | 6.136428444 | protein_coding   | 1 | 18081808  | 18153558  | ACTL8      |
| ENSG00000117151 | 6.509364082 | 6.525377513 | protein_coding   | 1 | 85018804  | 85040163  | CTBS       |
| ENSG00000117152 | 3.502389126 | 3.183544561 | protein_coding   | 1 | 163038565 | 163046592 | RG54       |
| ENSG00000117153 | 8.333361768 | 8.334763756 | protein_coding   | 1 | 202860228 | 202897764 | KLHL12     |
| ENSG00000117155 | 7.481543613 | 7.648510984 | protein_coding   | 1 | 85109390  | 85156486  | SSX2IP     |
| ENSG00000117174 | 8.219950371 | 8.197845922 | protein_coding   | 1 | 86115106  | 86174116  | ZNHIT6     |
| ENSG00000117222 | 7.950269163 | 7.582164879 | protein_coding   | 1 | 205055270 | 205091143 | RBBP5      |
| ENSG00000117226 | 7.416718478 | 7.58917149  | protein_coding   | 1 | 89472349  | 89488577  | GBP3       |
| ENSG00000117228 | 8.978417134 | 9.875786748 | protein_coding   | 1 | 89518002  | 89531043  | GBP1       |
| ENSG00000117242 | 6.121171528 | 5.974624386 | processed_transc | 1 | 20969150  | 20978686  | PINK1-AS1  |
| ENSG00000117245 | 4.230497448 | 4.489113623 | protein_coding   | 1 | 20990507  | 21044510  | KIF17      |
| ENSG00000117262 | 5.191549282 | 5.526427614 | protein_coding   | 1 | 145764411 | 145827103 | GPR89A     |
| ENSG00000117266 | 8.280649185 | 7.928139131 | protein_coding   | 1 | 205473723 | 205501921 | CDK18      |
| ENSG00000117280 | 8.092494681 | 7.982367515 | protein_coding   | 1 | 205737114 | 205744588 | RAB7L1     |
| ENSG00000117281 | 3.830412367 | 3.570966319 | protein_coding   | 1 | 145695798 | 145715614 | CD160      |
| ENSG00000117289 | 11.24990009 | 11.91550818 | protein_coding   | 1 | 145438469 | 145442635 | TXNIP      |
| ENSG00000117298 | 11.9539871  | 12.12657065 | protein_coding   | 1 | 21543740  | 21671997  | ECE1       |
| ENSG00000117305 | 7.578314254 | 7.994732806 | protein_coding   | 1 | 24128375  | 24165110  | HMGCL      |
| ENSG00000117308 | 8.787867896 | 9.040423325 | protein_coding   | 1 | 24122089  | 24127271  | GALE       |
| ENSG00000117318 | 9.226515195 | 9.884831244 | protein_coding   | 1 | 23884409  | 23886285  | ID3        |
| ENSG00000117335 | 10.42977299 | 10.16592567 | protein_coding   | 1 | 207925402 | 207968858 | CD46       |
| ENSG00000117360 | 9.445858656 | 9.741251102 | protein_coding   | 1 | 150293925 | 150325671 | PRPF3      |
| ENSG00000117362 | 11.05208383 | 11.01665963 | protein_coding   | 1 | 150237804 | 150241980 | APH1A      |
| ENSG00000117385 | 9.46791839  | 10.0752671  | protein_coding   | 1 | 43212006  | 43232755  | LEPRE1     |
| ENSG00000117394 | 11.07022268 | 11.5307423  | protein_coding   | 1 | 43391519  | 43424539  | SLC2A1     |
| ENSG00000117395 | 10.51455271 | 11.06938831 | protein_coding   | 1 | 43629846  | 43727589  | EBNA1BP2   |
| ENSG00000117399 | 11.12811304 | 10.94154414 | protein_coding   | 1 | 43824599  | 43828874  | CDC20      |
| ENSG00000117400 | 1.407729925 | 1.925536307 | protein_coding   | 1 | 43803475  | 43818443  | MPL        |
| ENSG00000117407 | 7.161632221 | 6.677762549 | protein_coding   | 1 | 44398992  | 44402913  | ARTN       |
| ENSG00000117408 | 9.207478296 | 9.426149618 | protein_coding   | 1 | 44412611  | 44433694  | IPO13      |
| ENSG00000117410 | 8.860220382 | 9.124010896 | protein_coding   | 1 | 44440159  | 44443967  | ATP6V0B    |
| ENSG00000117411 | 9.930083245 | 9.893819392 | protein_coding   | 1 | 44444615  | 44456840  | B4GALT2    |
| ENSG00000117419 | 9.255095676 | 9.546823838 | protein_coding   | 1 | 44686742  | 44820932  | ERI3       |
| ENSG00000117425 | 3.502389126 | 3.570966319 | protein_coding   | 1 | 45285516  | 45308735  | PTCH2      |
| ENSG00000117448 | 9.205459721 | 9.317839931 | protein_coding   | 1 | 46016215  | 46035721  | AKR1A1     |
| ENSG00000117450 | 11.70296837 | 11.92465406 | protein_coding   | 1 | 45976708  | 45988719  | PRDX1      |

|                 |             |             |                |    |           |           |          |
|-----------------|-------------|-------------|----------------|----|-----------|-----------|----------|
| ENSG00000117461 | 8.353554553 | 7.73528765  | protein_coding | 1  | 46505812  | 46642160  | PIK3R3   |
| ENSG00000117472 | 6.0776925   | 3.232099092 | protein_coding | 1  | 46640745  | 46651630  | TSPAN1   |
| ENSG00000117475 | 7.406211319 | 7.696882678 | protein_coding | 1  | 169337208 | 169365778 | BLZF1    |
| ENSG00000117477 | 1.407729925 | 0.950786998 | protein_coding | 1  | 169364108 | 169429907 | C1orf114 |
| ENSG00000117479 | 7.186405829 | 7.359856617 | protein_coding | 1  | 169433147 | 169455241 | SLC19A2  |
| ENSG00000117480 | 6.428602508 | 6.365895578 | protein_coding | 1  | 46859937  | 46879520  | FAAH     |
| ENSG00000117481 | 8.490822808 | 8.571336379 | protein_coding | 1  | 46805849  | 46830824  | NSUN4    |
| ENSG00000117500 | 9.563214301 | 9.565299431 | protein_coding | 1  | 93615299  | 93646285  | TMED5    |
| ENSG00000117505 | 9.079967361 | 9.148724524 | protein_coding | 1  | 93811445  | 93828149  | DR1      |
| ENSG00000117507 | 0           | 0.390640832 | protein_coding | 1  | 171106879 | 171130707 | FMO6P    |
| ENSG00000117519 | 10.18182545 | 10.35249425 | protein_coding | 1  | 95362507  | 95392834  | CNN3     |
| ENSG00000117523 | 11.17837695 | 11.21294852 | protein_coding | 1  | 171454651 | 171562650 | PRRC2C   |
| ENSG00000117525 | 10.33370433 | 9.839030856 | protein_coding | 1  | 94994781  | 95007356  | F3       |
| ENSG00000117528 | 8.655134734 | 8.993663261 | protein_coding | 1  | 94883933  | 94984222  | ABCD3    |
| ENSG00000117533 | 6.421663777 | 6.725179132 | protein_coding | 1  | 171669300 | 171711387 | VAMP4    |
| ENSG00000117543 | 7.319279953 | 7.825075067 | protein_coding | 1  | 101455179 | 101491644 | DPH5     |
| ENSG00000117569 | 7.348842929 | 7.210344614 | protein_coding | 1  | 97187221  | 97280349  | PTBP2    |
| ENSG00000117586 | 2.238690726 | 3.133298822 | protein_coding | 1  | 173152873 | 173176452 | TNFSF4   |
| ENSG00000117592 | 10.97804511 | 11.18527956 | protein_coding | 1  | 173446405 | 173457946 | PRDX6    |
| ENSG00000117593 | 9.503677432 | 9.493672366 | protein_coding | 1  | 173793641 | 173827684 | DARS2    |
| ENSG00000117594 | 0.869158192 | 1.518964905 | protein_coding | 1  | 209859510 | 209908295 | HSD11B1  |
| ENSG00000117595 | 8.741255403 | 4.385599336 | protein_coding | 1  | 209959036 | 209979465 | IRF6     |
| ENSG00000117597 | 8.14188337  | 8.520929986 | protein_coding | 1  | 210001352 | 210025558 | DIEXF    |
| ENSG00000117602 | 6.35766608  | 6.104183162 | protein_coding | 1  | 24829387  | 24863506  | RCAN3    |
| ENSG00000117614 | 7.971805197 | 8.293892101 | protein_coding | 1  | 25549170  | 25558993  | SYF2     |
| ENSG00000117616 | 7.751556534 | 8.593573257 | protein_coding | 1  | 25568728  | 25664704  | C1orf63  |
| ENSG00000117620 | 7.95748362  | 7.852510423 | protein_coding | 1  | 100435345 | 100492535 | SLC35A3  |
| ENSG00000117625 | 7.695130106 | 7.924450389 | protein_coding | 1  | 211431719 | 211489727 | RORC3A   |
| ENSG00000117632 | 10.37514929 | 11.16295153 | protein_coding | 1  | 26210672  | 26233482  | STMN1    |
| ENSG00000117640 | 7.430610036 | 7.84081624  | protein_coding | 1  | 26145131  | 26159432  | FAM54B   |
| ENSG00000117643 | 2.57521082  | 3.679994897 | protein_coding | 1  | 25943959  | 26112698  | MAN1C1   |
| ENSG00000117650 | 7.759833327 | 7.797107849 | protein_coding | 1  | 211836114 | 211848960 | NEK2     |
| ENSG00000117676 | 9.675388335 | 9.003312166 | protein_coding | 1  | 26856252  | 26901521  | RPS6KA1  |
| ENSG00000117682 | 8.994872754 | 8.69448524  | protein_coding | 1  | 26758773  | 26797785  | DHDDS    |
| ENSG00000117691 | 8.475827914 | 9.066597822 | protein_coding | 1  | 212606229 | 212619714 | NENF     |
| ENSG00000117697 | 7.789781675 | 8.036341107 | protein_coding | 1  | 212899495 | 212965124 | NSL1     |
| ENSG00000117713 | 10.26316297 | 10.10815782 | protein_coding | 1  | 27022524  | 27108595  | ARID1A   |
| ENSG00000117724 | 11.21520883 | 11.4509377  | protein_coding | 1  | 214776538 | 214837931 | CENPF    |
| ENSG00000117748 | 8.605481314 | 9.127223641 | protein_coding | 1  | 28218035  | 28241257  | RPA2     |
| ENSG00000117751 | 8.455589162 | 8.836685385 | protein_coding | 1  | 28157289  | 28178187  | PPP1R8   |
| ENSG00000117758 | 7.985986001 | 8.34031144  | protein_coding | 1  | 28099694  | 28150963  | STX12    |
| ENSG00000117791 | 5.684325135 | 5.700439663 | protein_coding | 1  | 220921567 | 220958150 | 2-Mar    |
| ENSG00000117834 | 0.499066092 | 0.697730409 | protein_coding | 1  | 48688357  | 48714316  | SLC5A9   |
| ENSG00000117859 | 9.569505979 | 9.603863718 | protein_coding | 1  | 52042851  | 52254889  | OSBPL9   |
| ENSG00000117862 | 8.967738537 | 9.543220426 | protein_coding | 1  | 52485803  | 52521843  | TXNDC12  |
| ENSG00000117868 | 10.54040657 | 10.13034291 | protein_coding | 7  | 158523686 | 158622944 | ESYT2    |
| ENSG00000117877 | 5.774228067 | 5.175534283 | protein_coding | 19 | 45909467  | 45914024  | CD3EAP   |
| ENSG00000117899 | 8.918065711 | 9.08571528  | protein_coding | 15 | 81239667  | 81282219  | MESDC2   |
| ENSG00000117906 | 8.687312327 | 9.506682457 | protein_coding | 15 | 77223960  | 77242601  | RCN2     |
| ENSG00000117971 | 2.671945279 | 1.667587519 | protein_coding | 15 | 78916461  | 79012628  | CHRNB4   |
| ENSG00000117983 | 6.522395495 | 4.489113623 | protein_coding | 11 | 1244296   | 1284402   | MUC5B    |
| ENSG00000117984 | 12.68203286 | 12.31779513 | protein_coding | 11 | 1773982   | 1785222   | CTSD     |
| ENSG00000118004 | 2.847891871 | 2.788380093 | protein_coding | 2  | 3642426   | 3692048   | COLEC11  |
| ENSG00000118007 | 7.943018447 | 7.86795666  | protein_coding | 3  | 136055077 | 136471220 | STAG1    |
| ENSG00000118017 | 0.869158192 | 0.950786998 | protein_coding | 3  | 137842560 | 137851229 | A4GNT    |
| ENSG00000118046 | 10.35662351 | 10.16553509 | protein_coding | 19 | 1205798   | 1228434   | STK11    |
| ENSG00000118058 | 10.3656902  | 10.43744755 | protein_coding | 11 | 118307205 | 118397539 | MLL      |
| ENSG00000118094 | 1.407729925 | 1.518964905 | protein_coding | 11 | 118528026 | 118550399 | TREH     |
| ENSG00000118096 | 6.414691513 | 7.522414019 | protein_coding | 11 | 118415243 | 118443685 | IFT46    |
| ENSG00000118137 | 0           | 0.390640832 | protein_coding | 11 | 116706467 | 116708666 | APOA1    |
| ENSG00000118156 | 4.77879189  | 6.475832214 | protein_coding | 19 | 48023942  | 48059113  | ZNF541   |
| ENSG00000118160 | 3.448790144 | 2.851901313 | protein_coding | 19 | 47931279  | 47975307  | SLC8A2   |
| ENSG00000118162 | 7.084651883 | 7.354383726 | protein_coding | 19 | 47978400  | 47987521  | KPTN     |

|                 |             |             |                  |    |           |           |          |
|-----------------|-------------|-------------|------------------|----|-----------|-----------|----------|
| ENSG00000118181 | 10.80820951 | 11.53043899 | protein_coding   | 11 | 118886422 | 118889401 | RPS25    |
| ENSG00000118193 | 8.549290825 | 8.323603978 | protein_coding   | 1  | 200520628 | 200589862 | KIF14    |
| ENSG00000118197 | 6.970425921 | 7.207311193 | protein_coding   | 1  | 200593024 | 200639126 | DDX59    |
| ENSG00000118200 | 9.303080552 | 9.247247272 | protein_coding   | 1  | 200708686 | 200829832 | CAMSAP2  |
| ENSG00000118217 | 9.819610198 | 10.38405976 | protein_coding   | 1  | 161736084 | 161933860 | ATF6     |
| ENSG00000118242 | 6.502803968 | 6.246885341 | protein_coding   | 2  | 216807557 | 216898819 | MREG     |
| ENSG00000118246 | 8.941297632 | 8.876367148 | protein_coding   | 2  | 207630081 | 207657233 | FASTKD2  |
| ENSG00000118257 | 8.312882337 | 5.776071827 | protein_coding   | 2  | 206546562 | 206662857 | NRP2     |
| ENSG00000118260 | 8.45218826  | 8.471229048 | protein_coding   | 2  | 208394461 | 208468155 | CREB1    |
| ENSG00000118263 | 8.893200037 | 8.69123279  | protein_coding   | 2  | 207938861 | 208031991 | KLF7     |
| ENSG00000118276 | 7.289098491 | 7.603083446 | protein_coding   | 18 | 29202209  | 29264686  | B4GALT6  |
| ENSG00000118292 | 2.238690726 | 2.788380093 | protein_coding   | 1  | 150240600 | 150253327 | C1orf54  |
| ENSG00000118298 | 3.077135474 | 2.420525079 | protein_coding   | 1  | 150230169 | 150237478 | CA14     |
| ENSG00000118307 | 1.16343121  | 1.518964905 | protein_coding   | 12 | 25261354  | 25348096  | CASC1    |
| ENSG00000118308 | 1.16343121  | 0.950786998 | protein_coding   | 12 | 25173936  | 25261268  | LRMP     |
| ENSG00000118322 | 2.35979773  | 2.420525079 | protein_coding   | 5  | 159990127 | 160279221 | ATP10B   |
| ENSG00000118363 | 7.246540262 | 7.544210495 | protein_coding   | 11 | 74660292  | 74690076  | SPCS2    |
| ENSG00000118369 | 6.798966424 | 6.819555981 | protein_coding   | 11 | 77899858  | 77925757  | USP35    |
| ENSG00000118407 | 0           | 1.353254395 | protein_coding   | 6  | 76005626  | 76203496  | FILIP1   |
| ENSG00000118412 | 7.91858278  | 8.293892101 | processed_transc | 6  | 90539613  | 90584155  | CASP8AP2 |
| ENSG00000118418 | 7.985986001 | 7.951888765 | protein_coding   | 6  | 79910962  | 79944406  | HMGN3    |
| ENSG00000118420 | 5.301468762 | 5.656642807 | protein_coding   | 6  | 83602117  | 83775560  | UBE2CBP  |
| ENSG00000118454 | 7.748787017 | 7.774746834 | protein_coding   | 1  | 70726271  | 70820417  | ANKRD13C |
| ENSG00000118473 | 0           | 0.390640832 | protein_coding   | 1  | 66999066  | 67213982  | SGIP1    |
| ENSG00000118482 | 9.342189974 | 9.6159211   | protein_coding   | 6  | 64345725  | 64489229  | PHF3     |
| ENSG00000118491 | 0           | 0.697730409 | protein_coding   | 6  | 144185573 | 144259483 | C6orf94  |
| ENSG00000118495 | 0           | 1.353254395 | protein_coding   | 6  | 144261437 | 144385735 | PLAGL1   |
| ENSG00000118496 | 8.002356002 | 7.780879746 | protein_coding   | 6  | 146119271 | 146135889 | FBXO30   |
| ENSG00000118503 | 10.27620418 | 10.48955424 | protein_coding   | 6  | 138188351 | 138204449 | TNFAIP3  |
| ENSG00000118507 | 5.270908378 | 5.404622322 | protein_coding   | 6  | 131456806 | 131604675 | AKAP7    |
| ENSG00000118508 | 9.399818301 | 10.01670633 | protein_coding   | 6  | 146864829 | 146876101 | RAB32    |
| ENSG00000118513 | 4.062237333 | 4.021284656 | protein_coding   | 6  | 135502453 | 135540311 | MYB      |
| ENSG00000118514 | 0           | 1.16600992  | protein_coding   | 6  | 135238528 | 135271260 | ALDH8A1  |
| ENSG00000118515 | 10.31837574 | 9.870045082 | protein_coding   | 6  | 134490384 | 134639250 | SGK1     |
| ENSG00000118518 | 7.266040677 | 7.848622884 | protein_coding   | 6  | 127587755 | 127609712 | RNF146   |
| ENSG00000118520 | 0.869158192 | 0.697730409 | protein_coding   | 6  | 131894284 | 131905472 | ARG1     |
| ENSG00000118523 | 11.10203752 | 10.36717494 | protein_coding   | 6  | 132269316 | 132272513 | CTGF     |
| ENSG00000118526 | 0           | 0.390640832 | protein_coding   | 6  | 134210276 | 134216691 | TCF21    |
| ENSG00000118557 | 3.911897206 | 4.42790041  | protein_coding   | 16 | 72146056  | 72210777  | PMFBP1   |
| ENSG00000118564 | 8.650690744 | 9.032734472 | protein_coding   | 4  | 15606162  | 15683302  | FBXL5    |
| ENSG00000118579 | 7.913645586 | 7.929979971 | protein_coding   | 4  | 17616254  | 17627477  | MED28    |
| ENSG00000118596 | 4.381167248 | 7.029859489 | protein_coding   | 12 | 59989848  | 60176395  | SLC16A7  |
| ENSG00000118600 | 7.654275977 | 8.101495266 | protein_coding   | 12 | 64173583  | 64203338  | TMEM5    |
| ENSG00000118620 | 7.413224588 | 6.952279523 | protein_coding   | 19 | 21203426  | 21242852  | ZNF430   |
| ENSG00000118640 | 8.398422578 | 8.517261232 | protein_coding   | 2  | 85788685  | 85809154  | VAMP8    |
| ENSG00000118655 | 7.886184801 | 8.0397549   | protein_coding   | 1  | 114447763 | 114456708 | DCLRE1B  |
| ENSG00000118680 | 10.35616868 | 10.62242012 | protein_coding   | 18 | 3261907   | 3278282   | MYL12B   |
| ENSG00000118689 | 9.807018378 | 9.630144961 | protein_coding   | 6  | 108881038 | 109005977 | FOXO3    |
| ENSG00000118690 | 4.165528823 | 4.810179682 | protein_coding   | 6  | 109169619 | 109295186 | ARMC2    |
| ENSG00000118705 | 12.10184497 | 12.86190128 | protein_coding   | 20 | 35806813  | 35870022  | RPN2     |
| ENSG00000118707 | 9.44329146  | 9.469827862 | protein_coding   | 20 | 35201891  | 35222560  | TGIF2    |
| ENSG00000118762 | 7.692250012 | 8.349968848 | protein_coding   | 4  | 88928820  | 88998929  | PKD2     |
| ENSG00000118777 | 7.115078652 | 6.563824016 | protein_coding   | 4  | 89011416  | 89152474  | ABCG2    |
| ENSG00000118785 | 0           | 1.16600992  | protein_coding   | 4  | 88896802  | 88904562  | SPP1     |
| ENSG00000118804 | 3.603959378 | 4.385599336 | protein_coding   | 4  | 77172886  | 77232752  | STBD1    |
| ENSG00000118816 | 11.3060841  | 11.0698058  | protein_coding   | 4  | 77968311  | 77997158  | CCNI     |
| ENSG00000118849 | 4.800350936 | 4.489113623 | protein_coding   | 3  | 158414681 | 158450485 | RARRES1  |
| ENSG00000118855 | 9.086562954 | 9.712663243 | protein_coding   | 3  | 158449987 | 158547508 | MFSD1    |
| ENSG00000118873 | 9.164483521 | 9.479287299 | protein_coding   | 1  | 220321635 | 220445796 | RAB3GAP2 |
| ENSG00000118894 | 7.67484765  | 7.465168131 | protein_coding   | 16 | 5134117   | 5147809   | FAM86A   |
| ENSG00000118898 | 8.006999229 | 5.35066967  | protein_coding   | 16 | 4932508   | 5010742   | PPL      |
| ENSG00000118900 | 9.836012692 | 9.700851959 | protein_coding   | 16 | 4896666   | 4932361   | UBN1     |
| ENSG00000118922 | 6.912209543 | 6.293387477 | protein_coding   | 13 | 74260226  | 74708394  | KLF12    |

|                 |             |             |                |    |           |           |          |
|-----------------|-------------|-------------|----------------|----|-----------|-----------|----------|
| ENSG00000118939 | 5.485736881 | 5.456629825 | protein_coding | 13 | 76123619  | 76180085  | UCHL3    |
| ENSG00000118960 | 8.241782151 | 7.733180651 | protein_coding | 2  | 20760208  | 20850849  | HS1BP3   |
| ENSG00000118961 | 6.820228284 | 6.310446475 | protein_coding | 2  | 20883803  | 21022882  | C2orf43  |
| ENSG00000118965 | 8.650690744 | 8.270836518 | protein_coding | 2  | 20110021  | 20189892  | WDR35    |
| ENSG00000118971 | 0.869158192 | 0           | protein_coding | 12 | 4382938   | 4414516   | CNDN2    |
| ENSG00000118976 | 0           | 0.390640832 | pseudogene     | 12 | 3948625   | 3951691   |          |
| ENSG00000118985 | 9.3522601   | 8.948064416 | protein_coding | 5  | 95220802  | 95297775  | ELL2     |
| ENSG00000118997 | 1.407729925 | 1.802319292 | protein_coding | 2  | 196602427 | 196935730 | DNAH7    |
| ENSG00000119004 | 6.528867325 | 6.908136232 | protein_coding | 2  | 204103663 | 204163009 | CYP20A1  |
| ENSG00000119013 | 7.695130106 | 7.939149102 | protein_coding | 2  | 201936156 | 201950473 | NDUFB3   |
| ENSG00000119041 | 8.760631512 | 8.467431533 | protein_coding | 2  | 197627756 | 197664449 | GTF3C3   |
| ENSG00000119042 | 8.023133844 | 7.953699568 | protein_coding | 2  | 200134223 | 200335989 | SATB2    |
| ENSG00000119048 | 8.227927477 | 8.320800493 | protein_coding | 5  | 133706870 | 133727683 | UBE2B    |
| ENSG00000119121 | 1.799000381 | 2.144285137 | protein_coding | 9  | 77337411  | 77503010  | TRPM6    |
| ENSG00000119138 | 7.178195136 | 6.582669759 | protein_coding | 9  | 72999503  | 73029540  | KLF9     |
| ENSG00000119139 | 11.00527807 | 11.11844254 | protein_coding | 9  | 71736224  | 71870124  | TJP2     |
| ENSG00000119185 | 8.904442656 | 8.846464976 | protein_coding | 2  | 9543604   | 9563676   | ITGB1BP1 |
| ENSG00000119203 | 9.441577455 | 8.975061478 | protein_coding | 2  | 9563697   | 9613230   | CPSF3    |
| ENSG00000119227 | 5.958104008 | 6.037446454 | protein_coding | 3  | 196673214 | 196695931 | PIGZ     |
| ENSG00000119231 | 8.861502869 | 8.69448524  | protein_coding | 3  | 196594727 | 196661585 | SENP5    |
| ENSG00000119242 | 8.215945216 | 8.685795691 | protein_coding | 12 | 124403207 | 124457378 | CCDC92   |
| ENSG00000119280 | 8.687312327 | 8.245929405 | protein_coding | 1  | 230972865 | 231005335 | C1orf198 |
| ENSG00000119283 | 0           | 0.697730409 | protein_coding | 1  | 231297858 | 231357302 | TRIM67   |
| ENSG00000119285 | 10.16841654 | 10.28181691 | protein_coding | 1  | 236712305 | 236767804 | HEATR1   |
| ENSG00000119314 | 11.25527652 | 10.46786018 | protein_coding | 9  | 114980715 | 115095947 | PTBP3    |
| ENSG00000119318 | 11.73007644 | 11.37948398 | protein_coding | 9  | 110045418 | 110094475 | RAD23B   |
| ENSG00000119321 | 9.410371954 | 9.682951719 | protein_coding | 9  | 115923286 | 115983641 | FKBP15   |
| ENSG00000119326 | 10.67268056 | 10.70724858 | protein_coding | 9  | 111704851 | 111775809 | CTNNAL1  |
| ENSG00000119328 | 7.832262274 | 7.500283181 | protein_coding | 9  | 111696461 | 111713024 | FAM206A  |
| ENSG00000119333 | 10.90560604 | 10.80176251 | protein_coding | 9  | 131395940 | 131419066 | WDR34    |
| ENSG00000119335 | 12.53807668 | 12.2859871  | protein_coding | 9  | 131445703 | 131458679 | SET      |
| ENSG00000119383 | 11.69237733 | 11.53920901 | protein_coding | 9  | 131873229 | 131911225 | PPP2R4   |
| ENSG00000119392 | 10.26024885 | 10.276401   | protein_coding | 9  | 131266979 | 131304567 | GLE1     |
| ENSG00000119396 | 10.21681795 | 10.01019541 | protein_coding | 9  | 123940415 | 123985292 | RAB14    |
| ENSG00000119397 | 8.243750574 | 7.760334499 | protein_coding | 9  | 123837141 | 123939888 | CNTRL    |
| ENSG00000119401 | 8.638772743 | 8.553535588 | protein_coding | 9  | 119449581 | 119463579 | TRIM32   |
| ENSG00000119402 | 8.782461599 | 8.732953241 | protein_coding | 9  | 123514256 | 123555690 | FBXW2    |
| ENSG00000119403 | 9.506959233 | 9.431357402 | protein_coding | 9  | 123617976 | 123639606 | PHF19    |
| ENSG00000119408 | 9.959126666 | 9.657067809 | protein_coding | 9  | 127019885 | 127115586 | NEK6     |
| ENSG00000119411 | 3.335220907 | 1.353254395 | protein_coding | 9  | 116111821 | 116133513 | BSPRY    |
| ENSG00000119414 | 9.788259363 | 9.499882282 | protein_coding | 9  | 127908852 | 127952218 | PPP6C    |
| ENSG00000119421 | 8.819887015 | 9.250933796 | protein_coding | 9  | 124894745 | 124922098 | NDUFA8   |
| ENSG00000119431 | 7.89873181  | 7.984140487 | protein_coding | 9  | 116135699 | 116139279 | HDHD3    |
| ENSG00000119446 | 8.12703021  | 8.122575449 | protein_coding | 9  | 125001834 | 125027118 | RBM18    |
| ENSG00000119457 | 1.960915222 | 2.721932731 | protein_coding | 9  | 115641200 | 115653193 | SLC46A2  |
| ENSG00000119471 | 9.557686483 | 9.100502039 | protein_coding | 9  | 115142217 | 115234690 | HSDL2    |
| ENSG00000119487 | 10.55395527 | 10.70429374 | protein_coding | 9  | 128199672 | 128469513 | MAPKAP1  |
| ENSG00000119508 | 3.652182994 | 2.420525079 | protein_coding | 9  | 102584137 | 102629173 | NR4A3    |
| ENSG00000119509 | 8.148202495 | 8.315177126 | protein_coding | 9  | 102861538 | 103063282 | INVS     |
| ENSG00000119514 | 6.220467583 | 3.368666104 | protein_coding | 9  | 101569981 | 101612363 | GALNT12  |
| ENSG00000119522 | 9.581229429 | 9.320649169 | protein_coding | 9  | 126141933 | 126692431 | DENND1A  |
| ENSG00000119523 | 8.962967004 | 9.256079154 | protein_coding | 9  | 101978708 | 101984238 | ALG2     |
| ENSG00000119537 | 9.197357059 | 9.11108789  | protein_coding | 18 | 60994971  | 61034743  | KDSR     |
| ENSG00000119541 | 8.462367008 | 8.310945169 | protein_coding | 18 | 61056423  | 61089693  | VPS4B    |
| ENSG00000119547 | 7.026383958 | 6.815578497 | protein_coding | 18 | 55102917  | 55158530  | ONECUT2  |
| ENSG00000119559 | 8.518728184 | 8.872543451 | protein_coding | 19 | 1473203   | 1479228   | C19orf25 |
| ENSG00000119574 | 8.243750574 | 8.278081046 | protein_coding | 19 | 59024899  | 59030921  | ZBTB45   |
| ENSG00000119596 | 10.40183845 | 10.18647659 | protein_coding | 14 | 75230069  | 75304012  | YLPM1    |
| ENSG00000119599 | 9.27736711  | 9.079094423 | protein_coding | 14 | 73393040  | 73426411  | DCAF4    |
| ENSG00000119608 | 2.928422289 | 4.202780776 | protein_coding | 14 | 75319736  | 75330537  | PROX2    |
| ENSG00000119616 | 9.247267789 | 9.328346488 | protein_coding | 14 | 75179847  | 75203394  | FCF1     |
| ENSG00000119630 | 6.528867325 | 6.475832214 | protein_coding | 14 | 75408537  | 75422487  | PGF      |
| ENSG00000119632 | 7.04456449  | 7.0637896   | protein_coding | 14 | 94594116  | 94596590  | IFI27L2  |



|                 |             |             |                |    |           |           |           |
|-----------------|-------------|-------------|----------------|----|-----------|-----------|-----------|
| ENSG00000119636 | 4.131913373 | 4.528525526 | protein_coding | 14 | 74486056  | 74549566  | C14orf45  |
| ENSG00000119638 | 10.39166588 | 10.43777104 | protein_coding | 14 | 75548822  | 75594047  | NEK9      |
| ENSG00000119640 | 6.616550626 | 7.029859489 | protein_coding | 14 | 75519924  | 75536186  | ACYP1     |
| ENSG00000119650 | 7.222786417 | 7.683850422 | protein_coding | 14 | 76368479  | 76550928  | IFT43     |
| ENSG00000119655 | 9.823563838 | 10.17914289 | protein_coding | 14 | 74942895  | 74960880  | NPC2      |
| ENSG00000119660 | 0           | 0.390640832 | pseudogene     | 14 | 75758809  | 75761016  |           |
| ENSG00000119661 | 6.095241663 | 6.198834244 | protein_coding | 14 | 74111578  | 74165604  | DNAL1     |
| ENSG00000119669 | 10.41500014 | 10.00714689 | protein_coding | 14 | 77490888  | 77495034  | IRF2BPL   |
| ENSG00000119673 | 7.395627075 | 8.109639521 | protein_coding | 14 | 74034324  | 74042357  | ACOT2     |
| ENSG00000119681 | 8.718787866 | 8.639296529 | protein_coding | 14 | 74964873  | 75079306  | LTBP2     |
| ENSG00000119682 | 9.686285316 | 9.901345166 | protein_coding | 14 | 75119880  | 75179818  | KIAA0317  |
| ENSG00000119684 | 7.55947245  | 7.892709342 | protein_coding | 14 | 75480467  | 75518235  | MLH3      |
| ENSG00000119685 | 8.950968668 | 8.747640323 | protein_coding | 14 | 76099968  | 76421421  | TTLL5     |
| ENSG00000119686 | 4.19837882  | 5.004391715 | protein_coding | 14 | 76044960  | 76129557  |           |
| ENSG00000119688 | 8.572970055 | 9.067434305 | protein_coding | 14 | 74752126  | 74769759  | ABCD4     |
| ENSG00000119689 | 10.33969843 | 10.54495849 | protein_coding | 14 | 75348594  | 75370448  | DLST      |
| ENSG00000119698 | 8.344411036 | 7.741590246 | protein_coding | 14 | 94612465  | 94746072  | PPP4R4    |
| ENSG00000119699 | 6.407685389 | 7.36802722  | protein_coding | 14 | 76424442  | 76449334  | TGFB3     |
| ENSG00000119703 | 3.448790144 | 5.47691899  | protein_coding | 14 | 75530873  | 75545126  | FAM164C   |
| ENSG00000119705 | 9.404225042 | 10.20293751 | protein_coding | 14 | 78174414  | 78227447  | SLIRP     |
| ENSG00000119707 | 10.84724869 | 11.33032591 | protein_coding | 14 | 73525144  | 73588122  | RBM25     |
| ENSG00000119711 | 7.409722215 | 7.714077892 | protein_coding | 14 | 74523553  | 74551196  | ALDH6A1   |
| ENSG00000119714 | 5.018397273 | 4.640685763 | protein_coding | 14 | 91698876  | 91720269  | GPR68     |
| ENSG00000119715 | 2.471521042 | 1.16600992  | protein_coding | 14 | 76776957  | 76968178  | ESRRB     |
| ENSG00000119718 | 8.445362311 | 8.874456566 | protein_coding | 14 | 75469614  | 75476292  | EIF2B2    |
| ENSG00000119720 | 8.359012976 | 8.034631177 | protein_coding | 14 | 90742580  | 90798481  | C14orf102 |
| ENSG00000119723 | 6.496213887 | 7.022976646 | protein_coding | 14 | 74416629  | 74430373  | COQ6      |
| ENSG00000119725 | 3.211941663 | 3.64455972  | protein_coding | 14 | 74353320  | 74399214  | ZNF410    |
| ENSG00000119729 | 8.109865782 | 8.448292555 | protein_coding | 2  | 46768945  | 46810260  | RHOQ      |
| ENSG00000119737 | 4.165528823 | 4.547834947 | protein_coding | 2  | 54080050  | 54087126  | GPR75     |
| ENSG00000119760 | 8.875535495 | 9.209096633 | protein_coding | 2  | 27873679  | 27886676  | SUPT7L    |
| ENSG00000119771 | 8.687312327 | 8.058387721 | protein_coding | 2  | 23608088  | 23931481  | KLHL29    |
| ENSG00000119772 | 7.292905885 | 6.615068802 | protein_coding | 2  | 25455845  | 25565459  | DNMT3A    |
| ENSG00000119777 | 10.72575555 | 10.84874214 | protein_coding | 2  | 27255778  | 27264563  | TMEM214   |
| ENSG00000119778 | 6.9512803   | 6.712401119 | protein_coding | 2  | 23971534  | 24149984  | ATAD2B    |
| ENSG00000119782 | 2.35979773  | 2.144285137 | protein_coding | 2  | 24272571  | 24286551  | FKBP1B    |
| ENSG00000119787 | 9.154055005 | 9.25681271  | protein_coding | 2  | 38522022  | 38604427  | ATL2      |
| ENSG00000119801 | 8.764749894 | 9.423538659 | protein_coding | 2  | 30369807  | 30383399  | YPEL5     |
| ENSG00000119812 | 9.843171129 | 9.94569357  | protein_coding | 2  | 33808725  | 33824449  | FAM98A    |
| ENSG00000119820 | 8.759256101 | 9.048918708 | protein_coding | 2  | 32502979  | 32537002  | YIPF4     |
| ENSG00000119844 | 8.203862602 | 8.259169069 | protein_coding | 2  | 64751465  | 64820139  | AFTPH     |
| ENSG00000119862 | 6.509364082 | 5.988823159 | protein_coding | 2  | 64681103  | 64688515  | LGALS1    |
| ENSG00000119865 | 0           | 0.390640832 | protein_coding | 2  | 68511303  | 68547183  | CNRIP1    |
| ENSG00000119866 | 0.499066092 | 0           | protein_coding | 2  | 60678302  | 60780702  | BCL11A    |
| ENSG00000119878 | 7.292905885 | 7.572769481 | protein_coding | 2  | 46843555  | 46852881  | CRIPT     |
| ENSG00000119888 | 8.295907473 | 3.493416095 | protein_coding | 2  | 47572297  | 47614740  | EPCAM     |
| ENSG00000119899 | 7.190493718 | 7.434373903 | protein_coding | 6  | 74303102  | 74363878  | SLC17A5   |
| ENSG00000119900 | 7.285281023 | 7.56568256  | protein_coding | 6  | 71998506  | 72011973  | OGFRL1    |
| ENSG00000119906 | 9.068907253 | 9.566483319 | protein_coding | 10 | 102672720 | 102724893 | FAM178A   |
| ENSG00000119912 | 9.652603664 | 9.911163541 | protein_coding | 10 | 94211441  | 94333833  | IDE       |
| ENSG00000119915 | 4.642199401 | 5.018301917 | protein_coding | 10 | 103986085 | 103989346 | ELOVL3    |
| ENSG00000119917 | 9.441577455 | 10.40968193 | protein_coding | 10 | 91087651  | 91100728  | IFIT3     |
| ENSG00000119922 | 8.862784218 | 9.581200526 | protein_coding | 10 | 91061712  | 91069033  | IFIT2     |
| ENSG00000119927 | 7.842689815 | 8.235547225 | protein_coding | 10 | 113909624 | 113975135 | GPAM      |
| ENSG00000119929 | 8.146099194 | 8.750768196 | protein_coding | 10 | 101462315 | 101515891 | CUTC      |
| ENSG00000119938 | 6.25990527  | 7.100213554 | protein_coding | 10 | 93388199  | 93392828  | PPP1R3C   |
| ENSG00000119943 | 5.827699195 | 6.264499759 | protein_coding | 10 | 100143322 | 100174941 | PYROXD2   |
| ENSG00000119950 | 8.626755466 | 9.045526555 | protein_coding | 10 | 111967363 | 112047123 | MXI1      |
| ENSG00000119953 | 8.684416567 | 8.784734524 | protein_coding | 10 | 112052798 | 112064709 | SMNDC1    |
| ENSG00000119965 | 6.681890601 | 6.881748114 | protein_coding | 10 | 124690419 | 124713919 | C10orf88  |
| ENSG00000119969 | 9.328343713 | 9.402479116 | protein_coding | 10 | 96305547  | 96373662  | HELLS     |
| ENSG00000119973 | 0           | 0.697730409 | protein_coding | 10 | 120352916 | 120355160 | PRLHR     |
| ENSG00000119977 | 9.218530254 | 9.414362912 | protein_coding | 10 | 97423153  | 97454712  | TCTN3     |

|                 |             |             |                |    |           |           |          |
|-----------------|-------------|-------------|----------------|----|-----------|-----------|----------|
| ENSG00000119979 | 7.778963161 | 8.127396674 | protein_coding | 10 | 120863598 | 120897496 | FAM45A   |
| ENSG00000119986 | 6.721980839 | 6.577981353 | protein_coding | 10 | 99437181  | 99447080  | AVPI1    |
| ENSG00000120008 | 9.154055005 | 9.691658363 | protein_coding | 10 | 122610695 | 122669036 | WDR11    |
| ENSG00000120029 | 8.282565319 | 8.758040301 | protein_coding | 10 | 103605356 | 103815950 | C10orf76 |
| ENSG00000120049 | 3.146112541 | 4.448594745 | protein_coding | 10 | 103585731 | 103603677 | KCNIP2   |
| ENSG00000120051 | 4.491309013 | 5.045726316 | protein_coding | 10 | 106113522 | 106214848 | CCDC147  |
| ENSG00000120053 | 9.194306789 | 9.221925935 | protein_coding | 10 | 101156627 | 101190393 | GOT1     |
| ENSG00000120055 | 6.872051157 | 6.637773454 | protein_coding | 10 | 104209574 | 104216054 | C10orf95 |
| ENSG00000120057 | 0.869158192 | 1.518964905 | protein_coding | 10 | 99526508  | 99531709  | SFRP5    |
| ENSG00000120063 | 9.98347984  | 10.10978283 | protein_coding | 17 | 63005407  | 63052920  | GNA13    |
| ENSG00000120068 | 0.869158192 | 0.390640832 | protein_coding | 17 | 46688446  | 46692653  | HOXB8    |
| ENSG00000120071 | 8.650690744 | 8.42106413  | protein_coding | 17 | 44107334  | 44270166  | KIAA1267 |
| ENSG00000120075 | 0.499066092 | 0           | protein_coding | 17 | 46668619  | 46671323  | HOXB5    |
| ENSG00000120087 | 0           | 0.390640832 | protein_coding | 17 | 46684590  | 46710934  | HOXB7    |
| ENSG00000120088 | 0           | 0.697730409 | protein_coding | 17 | 43699267  | 43913193  | CRHR1    |
| ENSG00000120093 | 1.16343121  | 1.925536307 | protein_coding | 17 | 46626232  | 46667634  | HOXB3    |
| ENSG00000120129 | 10.77830572 | 8.724493    | protein_coding | 5  | 172195093 | 172198198 | DUSP1    |
| ENSG00000120137 | 9.228504544 | 9.188483253 | protein_coding | 5  | 167975500 | 168006605 | PANK3    |
| ENSG00000120149 | 5.649112675 | 5.339632724 | protein_coding | 5  | 174151536 | 174158144 | MSX2     |
| ENSG00000120156 | 0           | 0.950786998 | protein_coding | 9  | 27109139  | 27230173  | TEK      |
| ENSG00000120158 | 6.442380648 | 6.064512706 | protein_coding | 9  | 4792869   | 4861064   | RCL1     |
| ENSG00000120159 | 6.670228606 | 6.984522608 | protein_coding | 9  | 26840683  | 26892802  | C9orf82  |
| ENSG00000120162 | 2.928422289 | 2.334191469 | protein_coding | 9  | 27325207  | 27529779  | MOB3B    |
| ENSG00000120215 | 1.960915222 | 1.353254395 | protein_coding | 9  | 5890802   | 5910606   | MLANA    |
| ENSG00000120217 | 7.0218028   | 7.315480906 | protein_coding | 9  | 5450503   | 5470566   | CD274    |
| ENSG00000120251 | 0           | 0.390640832 | protein_coding | 4  | 158125334 | 158287227 | GRIA2    |
| ENSG00000120253 | 8.999540089 | 9.029304007 | protein_coding | 6  | 150045451 | 150070801 | NUP43    |
| ENSG00000120254 | 9.648151859 | 9.487435606 | protein_coding | 6  | 151186685 | 151423023 | MTHFD1L  |
| ENSG00000120256 | 9.326487463 | 9.023280994 | protein_coding | 6  | 150139934 | 150186199 | LRP11    |
| ENSG00000120262 | 1.407729925 | 0.390640832 | protein_coding | 6  | 151815165 | 151942328 | C6orf97  |
| ENSG00000120265 | 9.524876896 | 9.637486317 | protein_coding | 6  | 150070579 | 150132556 | PCMT1    |
| ENSG00000120278 | 5.072559152 | 3.411459265 | protein_coding | 6  | 150920999 | 151164799 | PLEKHG1  |
| ENSG00000120279 | 0           | 0.390640832 | protein_coding | 6  | 153019030 | 153045702 | MYCT1    |
| ENSG00000120306 | 7.72925009  | 7.389591938 | protein_coding | 5  | 139554227 | 139661637 | C5orf32  |
| ENSG00000120314 | 8.779750834 | 8.296748314 | protein_coding | 5  | 140044261 | 140053709 | WDR55    |
| ENSG00000120318 | 8.15239992  | 7.809160246 | protein_coding | 5  | 141013251 | 141061788 | ARAP3    |
| ENSG00000120322 | 6.469548347 | 6.619638408 | protein_coding | 5  | 140557371 | 140560081 | PCDHB8   |
| ENSG00000120324 | 4.19837882  | 4.710890357 | protein_coding | 5  | 140571942 | 140575215 | PCDHB10  |
| ENSG00000120327 | 6.489593565 | 5.953060722 | protein_coding | 5  | 140602931 | 140605858 | PCDHB14  |
| ENSG00000120328 | 3.871730003 | 3.608232228 | protein_coding | 5  | 140588269 | 140591696 | PCDHB12  |
| ENSG00000120329 | 1.16343121  | 0.390640832 | protein_coding | 5  | 140682196 | 140683612 | SLC25A2  |
| ENSG00000120333 | 7.246540262 | 7.641787375 | protein_coding | 1  | 174979925 | 174992561 | MRPS14   |
| ENSG00000120334 | 6.96088487  | 6.988061092 | protein_coding | 1  | 173768688 | 173793858 | CENPL    |
| ENSG00000120337 | 3.830412367 | 5.150490275 | protein_coding | 1  | 173009100 | 173020103 | TNFSF18  |
| ENSG00000120370 | 5.889353623 | 6.934050347 | protein_coding | 1  | 170501270 | 170522974 | GORAB    |
| ENSG00000120436 | 0           | 0.390640832 | protein_coding | 6  | 167569759 | 167571817 | GPR31    |
| ENSG00000120437 | 8.154494062 | 8.151264044 | protein_coding | 6  | 160181360 | 160200144 | ACAT2    |
| ENSG00000120438 | 11.30160288 | 11.15057154 | protein_coding | 6  | 160199530 | 160210781 | TCP1     |
| ENSG00000120440 | 1.960915222 | 3.232099092 | protein_coding | 6  | 167738574 | 167772991 | TLL2     |
| ENSG00000120451 | 9.859951197 | 9.843432726 | protein_coding | 11 | 130745331 | 130786404 | SNX19    |
| ENSG00000120457 | 4.568725997 | 3.081239798 | protein_coding | 11 | 128760140 | 128790930 | KCNJ5    |
| ENSG00000120458 | 7.689364157 | 8.041458772 | protein_coding | 11 | 124636394 | 124670569 | C11orf61 |
| ENSG00000120471 | 1.407729925 | 1.802319292 | protein_coding | 11 | 128804626 | 128813040 | TP53AIP1 |
| ENSG00000120498 | 0           | 0.390640832 | protein_coding | X  | 69748790  | 70128581  | TEX11    |
| ENSG00000120500 | 3.146112541 | 3.279072565 | protein_coding | X  | 69488155  | 69501690  | ARR3     |
| ENSG00000120509 | 8.120617457 | 8.520929986 | protein_coding | X  | 69506445  | 69510364  | PDZD11   |
| ENSG00000120519 | 6.585843317 | 6.246885341 | protein_coding | 4  | 147175127 | 147443123 | SLC10A7  |
| ENSG00000120526 | 8.135536446 | 8.379906558 | protein_coding | 8  | 110253148 | 110346614 | NUDCD1   |
| ENSG00000120533 | 7.800519667 | 8.673761454 | protein_coding | 8  | 110346553 | 110358182 | ENY2     |
| ENSG00000120539 | 8.591637531 | 9.712663243 | protein_coding | 10 | 27443753  | 27475848  | MASTL    |
| ENSG00000120549 | 10.27572327 | 9.160532436 | protein_coding | 10 | 23983675  | 24836772  | KIAA1217 |
| ENSG00000120555 | 2.928422289 | 3.232099092 | protein_coding | 10 | 38671951  | 38691844  | SEPT7L   |
| ENSG00000120594 | 0.499066092 | 0.390640832 | protein_coding | 10 | 20105168  | 20569286  | PLXDC2   |

|                 |             |             |                |    |           |           |           |
|-----------------|-------------|-------------|----------------|----|-----------|-----------|-----------|
| ENSG00000120616 | 7.281453427 | 8.780659733 | protein_coding | 10 | 32556679  | 32667726  | EPC1      |
| ENSG00000120645 | 3.004694206 | 0.390640832 | protein_coding | 12 | 175931    | 287626    | IQSEC3    |
| ENSG00000120647 | 7.654275977 | 7.892709342 | protein_coding | 12 | 498439    | 551811    | CCDC77    |
| ENSG00000120656 | 7.234712227 | 7.470237199 | protein_coding | 1  | 28915835  | 28969597  | TAF12     |
| ENSG00000120658 | 0           | 0.697730409 | protein_coding | 13 | 43787654  | 44361044  | ENOX1     |
| ENSG00000120662 | 6.204385613 | 5.683080141 | protein_coding | 13 | 41790825  | 41837742  | MTRF1     |
| ENSG00000120664 | 1.16343121  | 1.353254395 | protein_coding | 13 | 36920568  | 36943738  | SPG200S   |
| ENSG00000120675 | 1.407729925 | 1.518964905 | protein_coding | 13 | 43597339  | 43683045  | DNAJC15   |
| ENSG00000120685 | 9.476313889 | 8.605140645 | protein_coding | 13 | 39584002  | 39612252  | PROSER1   |
| ENSG00000120686 | 9.009986712 | 8.475016594 | protein_coding | 13 | 38923986  | 38937140  | UFM1      |
| ENSG00000120688 | 6.820228284 | 6.495854971 | protein_coding | 13 | 41635410  | 41658137  | WBP4      |
| ENSG00000120690 | 8.536501169 | 8.117738058 | protein_coding | 13 | 41506056  | 41635576  | ELF1      |
| ENSG00000120693 | 3.603959378 | 2.971122874 | protein_coding | 13 | 37418968  | 37494902  | SMAD9     |
| ENSG00000120694 | 10.12475765 | 9.70408282  | protein_coding | 13 | 31710762  | 31736525  | HSPH1     |
| ENSG00000120696 | 6.252103507 | 5.700439663 | protein_coding | 13 | 41763969  | 41768702  | KBTBD7    |
| ENSG00000120697 | 6.435508026 | 6.592001111 | protein_coding | 13 | 37523912  | 37574398  | ALG5      |
| ENSG00000120699 | 7.615275323 | 7.637287497 | protein_coding | 13 | 37572953  | 37583750  | EXOSC8    |
| ENSG00000120705 | 10.45462978 | 10.27277906 | protein_coding | 5  | 137841784 | 137878989 | ETF1      |
| ENSG00000120708 | 12.73547073 | 13.63261147 | protein_coding | 5  | 135364584 | 135399507 | TGFB1     |
| ENSG00000120709 | 9.479658457 | 9.411071665 | protein_coding | 5  | 137667624 | 137685416 | FAM53C    |
| ENSG00000120725 | 8.755121984 | 9.157393097 | protein_coding | 5  | 138282409 | 138629246 | SIL1      |
| ENSG00000120727 | 8.241782151 | 8.129000175 | protein_coding | 5  | 138677276 | 138705406 | PAIP2     |
| ENSG00000120729 | 2.57521082  | 2.501982735 | protein_coding | 5  | 137203480 | 137223540 | MYOT      |
| ENSG00000120733 | 10.11833477 | 9.735999615 | protein_coding | 5  | 137688285 | 137772717 | KDM3B     |
| ENSG00000120738 | 12.83258876 | 6.252780742 | protein_coding | 5  | 137801169 | 137805004 | EGR1      |
| ENSG00000120742 | 10.56777082 | 10.55364094 | protein_coding | 3  | 150259781 | 150321015 | SERP1     |
| ENSG00000120756 | 8.455589162 | 7.948260326 | protein_coding | 3  | 142315229 | 142432506 | PLS1      |
| ENSG00000120784 | 6.535310252 | 6.787424764 | protein_coding | 19 | 38123389  | 38147162  | ZFP30     |
| ENSG00000120798 | 6.998676229 | 7.429177016 | protein_coding | 12 | 95415669  | 95467479  | NR2C1     |
| ENSG00000120800 | 9.187164314 | 8.911264037 | protein_coding | 12 | 101673887 | 101780394 | UTP20     |
| ENSG00000120802 | 10.23869682 | 10.5201215  | protein_coding | 12 | 98909290  | 98944157  | TMPO      |
| ENSG00000120805 | 8.628263112 | 8.897218229 | protein_coding | 12 | 101786898 | 101801598 | ARL1      |
| ENSG00000120820 | 3.335220907 | 3.64455972  | protein_coding | 12 | 104382762 | 104457961 | GLT8D2    |
| ENSG00000120832 | 5.977159882 | 6.2290532   | protein_coding | 12 | 107371069 | 107380944 | MTERFD3   |
| ENSG00000120833 | 6.335686705 | 5.555337277 | protein_coding | 12 | 93963590  | 93977263  | SOCS2     |
| ENSG00000120837 | 7.642387679 | 8.194786822 | protein_coding | 12 | 104510855 | 104532067 | NFYB      |
| ENSG00000120860 | 6.393570237 | 7.106738413 | protein_coding | 12 | 102406705 | 102455927 | CCDC53    |
| ENSG00000120868 | 7.341508784 | 7.026422172 | protein_coding | 12 | 99038919  | 99129204  | APAF1     |
| ENSG00000120875 | 9.119096064 | 8.768365845 | protein_coding | 8  | 29190581  | 29208185  | DUSP4     |
| ENSG00000120885 | 8.129161475 | 9.462851308 | protein_coding | 8  | 27454434  | 27472548  | CLU       |
| ENSG00000120889 | 10.77354482 | 10.83136512 | protein_coding | 8  | 22877646  | 22926692  | TNFRSF10B |
| ENSG00000120896 | 9.816307202 | 9.684588223 | protein_coding | 8  | 22402499  | 22433301  | SORBS3    |
| ENSG00000120899 | 9.362260424 | 8.202422444 | protein_coding | 8  | 27168999  | 27316903  | PTK2B     |
| ENSG00000120903 | 0.869158192 | 0.390640832 | protein_coding | 8  | 27317279  | 27337400  | CHRNA2    |
| ENSG00000120910 | 7.593829938 | 8.401295742 | protein_coding | 8  | 22298332  | 22398652  | PPP3CC    |
| ENSG00000120913 | 5.588445295 | 6.071200665 | protein_coding | 8  | 22435792  | 22455538  | PDLIM2    |
| ENSG00000120915 | 5.191549282 | 5.22435463  | protein_coding | 8  | 27348296  | 27403081  | EPHX2     |
| ENSG00000120925 | 6.283060568 | 6.525377513 | protein_coding | 8  | 42704780  | 42752433  | RNF170    |
| ENSG00000120937 | 0.499066092 | 2.912743273 | protein_coding | 1  | 11917521  | 11918988  | NPPB      |
| ENSG00000120942 | 7.911170638 | 7.999999944 | protein_coding | 1  | 11333263  | 11356106  | UBIAD1    |
| ENSG00000120948 | 10.54719682 | 10.76613996 | protein_coding | 1  | 11072414  | 11085796  | TARDBP    |
| ENSG00000120949 | 2.35979773  | 1.802319292 | protein_coding | 1  | 12123434  | 12204264  | TNFRSF8   |
| ENSG00000120963 | 8.830404061 | 8.993663261 | protein_coding | 8  | 102190106 | 102218421 | ZNF706    |
| ENSG00000120992 | 9.559268022 | 9.535986486 | protein_coding | 8  | 54958938  | 55014577  | LYPLA1    |
| ENSG00000121022 | 8.944931872 | 8.81990641  | protein_coding | 8  | 67955314  | 67996018  | COP5      |
| ENSG00000121039 | 7.444369108 | 7.083771121 | protein_coding | 8  | 74206847  | 74237516  | RDH10     |
| ENSG00000121053 | 0.869158192 | 2.039052734 | protein_coding | 17 | 56270089  | 56282534  | EPX       |
| ENSG00000121057 | 9.901066862 | 10.09098372 | protein_coding | 17 | 55162551  | 55198710  | AKAP1     |
| ENSG00000121058 | 7.870982917 | 8.163833676 | protein_coding | 17 | 55015563  | 55038411  | COIL      |
| ENSG00000121060 | 10.99157943 | 11.15293784 | protein_coding | 17 | 54965270  | 54991409  | TRIM25    |
| ENSG00000121064 | 8.337054268 | 9.040423325 | protein_coding | 17 | 55055468  | 55084127  | SCPEP1    |
| ENSG00000121067 | 8.583888749 | 8.754928172 | protein_coding | 17 | 47676246  | 47755596  | SPOP      |
| ENSG00000121068 | 0.499066092 | 0.390640832 | protein_coding | 17 | 59477257  | 59486827  | TBX2      |

|                 |             |             |                |    |           |           |          |
|-----------------|-------------|-------------|----------------|----|-----------|-----------|----------|
| ENSG00000121073 | 8.810621286 | 8.793860943 | protein_coding | 17 | 47778305  | 47786376  | SLC35B1  |
| ENSG00000121075 | 1.616589159 | 0.950786998 | protein_coding | 17 | 59529779  | 59562469  | TBX4     |
| ENSG00000121083 | 9.340351466 | 8.886830358 | protein_coding | 17 | 56160780  | 56167618  | DYNLL2   |
| ENSG00000121089 | 5.660945913 | 6.24096575  | pseudogene     | 4  | 165864442 | 165865089 | NACA3P   |
| ENSG00000121101 | 3.274897671 | 3.232099092 | protein_coding | 17 | 56634042  | 56769416  | TEX14    |
| ENSG00000121104 | 6.693459083 | 5.96747225  | protein_coding | 17 | 47787694  | 47866542  | FAM117A  |
| ENSG00000121152 | 9.047656547 | 8.89533508  | protein_coding | 2  | 97001525  | 97039583  | NCAPH    |
| ENSG00000121210 | 8.810621286 | 8.946246521 | protein_coding | 4  | 154387498 | 154557863 | KIAA0922 |
| ENSG00000121211 | 6.941611359 | 7.987679908 | protein_coding | 4  | 154265801 | 154336270 | MND1     |
| ENSG00000121236 | 7.420203928 | 7.195117037 | protein_coding | 11 | 5617339   | 5634188   | TRIM6    |
| ENSG00000121270 | 1.616589159 | 2.334191469 | protein_coding | 16 | 48200821  | 48281479  | ABCC11   |
| ENSG00000121274 | 8.191677941 | 8.46235258  | protein_coding | 16 | 50186829  | 50269221  | PAPD5    |
| ENSG00000121281 | 9.911010438 | 10.14031537 | protein_coding | 16 | 50280048  | 50352046  | ADCY7    |
| ENSG00000121289 | 6.771940731 | 6.948652068 | protein_coding | 19 | 33369908  | 33462869  | CEP89    |
| ENSG00000121310 | 8.314756163 | 8.669360359 | protein_coding | 1  | 53361656  | 53392884  | ECHDC2   |
| ENSG00000121316 | 0.869158192 | 1.667587519 | protein_coding | 12 | 14656595  | 14721283  | PLBD1    |
| ENSG00000121318 | 0.869158192 | 0           | protein_coding | 12 | 10977916  | 10978957  | TAS2R10  |
| ENSG00000121335 | 0           | 1.16600992  | protein_coding | 12 | 11544476  | 11653975  | PRB2     |
| ENSG00000121350 | 5.795854912 | 5.555337277 | protein_coding | 12 | 21590549  | 21623300  | PYROXD1  |
| ENSG00000121361 | 1.960915222 | 1.16600992  | protein_coding | 12 | 21917889  | 21928515  | KCNJ8    |
| ENSG00000121380 | 1.960915222 | 2.334191469 | protein_coding | 12 | 12202797  | 12363947  | BCL2L14  |
| ENSG00000121390 | 8.566693498 | 8.68797299  | protein_coding | 13 | 20248896  | 20357142  | PSPC1    |
| ENSG00000121406 | 6.956090577 | 6.811590016 | protein_coding | 19 | 58038693  | 58052124  | ZNF549   |
| ENSG00000121410 | 6.163378456 | 6.624193585 | protein_coding | 19 | 58858172  | 58864865  | A1BG     |
| ENSG00000121413 | 8.891945431 | 9.040423325 | protein_coding | 19 | 58595212  | 58629793  | ZSCAN18  |
| ENSG00000121417 | 7.395627075 | 7.510161044 | protein_coding | 19 | 58141761  | 58154147  | ZNF211   |
| ENSG00000121454 | 3.989024711 | 4.29708397  | protein_coding | 1  | 180199421 | 180249380 | LHX4     |
| ENSG00000121481 | 7.04004079  | 6.908136232 | protein_coding | 1  | 185014496 | 185071740 | RNF2     |
| ENSG00000121486 | 7.402691859 | 8.053329862 | protein_coding | 1  | 185087220 | 185126204 | TRMT1L   |
| ENSG00000121542 | 6.738827102 | 6.877938671 | protein_coding | 3  | 122920774 | 122992977 | SEC22A   |
| ENSG00000121552 | 5.141750194 | 4.406904905 | protein_coding | 3  | 122044091 | 122060819 | CSTA     |
| ENSG00000121577 | 1.16343121  | 2.144285137 | protein_coding | 3  | 119355304 | 119384171 | POPDC2   |
| ENSG00000121578 | 7.285281023 | 7.57041104  | protein_coding | 3  | 118930579 | 118959950 | B4GALT4  |
| ENSG00000121579 | 10.82868101 | 10.58756595 | protein_coding | 3  | 113437841 | 113465147 | NAA50    |
| ENSG00000121594 | 1.16343121  | 0.697730409 | protein_coding | 3  | 119243140 | 119278449 | CD80     |
| ENSG00000121621 | 8.368064704 | 8.728729322 | protein_coding | 11 | 28042167  | 28129693  | KIF18A   |
| ENSG00000121634 | 0           | 0.390640832 | protein_coding | 1  | 147374946 | 147381393 | GJA8     |
| ENSG00000121644 | 9.665877245 | 9.778507838 | protein_coding | 1  | 244816237 | 244872335 | PPPDE1   |
| ENSG00000121653 | 7.186405829 | 7.679480043 | protein_coding | 11 | 45907202  | 45928016  | MAPK8IP1 |
| ENSG00000121671 | 6.872051157 | 6.673373662 | protein_coding | 11 | 45868669  | 45904798  | CRY2     |
| ENSG00000121680 | 8.002356002 | 8.417132063 | protein_coding | 11 | 45931220  | 45940363  | PEX16    |
| ENSG00000121690 | 6.892270075 | 7.022976646 | protein_coding | 11 | 33037410  | 33055128  | DEPDC7   |
| ENSG00000121691 | 9.116949866 | 8.878275203 | protein_coding | 11 | 34460472  | 34493609  | CAT      |
| ENSG00000121716 | 9.136151669 | 9.062408117 | protein_coding | 7  | 99933702  | 99965454  | PILRB    |
| ENSG00000121741 | 9.564789794 | 9.250933796 | protein_coding | 13 | 20532810  | 20665968  | ZMYM2    |
| ENSG00000121742 | 2.10647801  | 0           | protein_coding | 13 | 20796110  | 20806534  | GJB6     |
| ENSG00000121743 | 6.005279909 | 3.027231696 | protein_coding | 13 | 20712394  | 20735188  | GJA3     |
| ENSG00000121749 | 8.094677541 | 8.669360359 | protein_coding | 12 | 72233487  | 72320629  | TBC1D15  |
| ENSG00000121753 | 7.726437377 | 8.019149911 | protein_coding | 1  | 32192718  | 32230494  | BAI2     |
| ENSG00000121764 | 0.499066092 | 0.950786998 | protein_coding | 1  | 32083287  | 32098119  | HCRTR1   |
| ENSG00000121766 | 7.639400234 | 7.951888765 | protein_coding | 1  | 31769842  | 31837783  | ZCCHC17  |
| ENSG00000121769 | 2.35979773  | 1.353254395 | protein_coding | 1  | 31838472  | 31849697  | FABP3    |
| ENSG00000121774 | 10.97774947 | 10.85408437 | protein_coding | 1  | 32479430  | 32526451  | KHDRBS1  |
| ENSG00000121775 | 7.845284967 | 7.714077892 | protein_coding | 1  | 32537632  | 32568467  | TMEM39B  |
| ENSG00000121797 | 5.625150983 | 5.112089758 | protein_coding | 3  | 46448654  | 46451014  | CCRL2    |
| ENSG00000121807 | 0.499066092 | 0.390640832 | protein_coding | 3  | 46395225  | 46402419  | CCR2     |
| ENSG00000121848 | 8.508940744 | 8.83962623  | protein_coding | 1  | 145611036 | 145690661 | RNF115   |
| ENSG00000121851 | 7.440941622 | 7.648510984 | protein_coding | 1  | 145456236 | 145470388 | POLR3GL  |
| ENSG00000121858 | 3.698846687 | 3.96493948  | protein_coding | 3  | 172223298 | 172241297 | TNFSF10  |
| ENSG00000121864 | 8.389559911 | 8.315177126 | protein_coding | 3  | 179040779 | 179053323 | ZNF639   |
| ENSG00000121871 | 0           | 0.390640832 | protein_coding | 3  | 164904508 | 164914897 | SLITRK3  |
| ENSG00000121879 | 8.385999544 | 8.363653959 | protein_coding | 3  | 178865902 | 178957881 | PIK3CA   |
| ENSG00000121892 | 10.63155234 | 10.65144    | protein_coding | 4  | 39824483  | 39979576  | PD55A    |

|                 |             |             |                |    |           |           |           |
|-----------------|-------------|-------------|----------------|----|-----------|-----------|-----------|
| ENSG00000121895 | 2.762599152 | 2.242360793 | protein_coding | 4  | 38968365  | 39034542  | TMEM156   |
| ENSG00000121897 | 5.879259127 | 5.808454063 | protein_coding | 4  | 39460620  | 39479273  | LIAS      |
| ENSG00000121898 | 0.869158192 | 1.16600992  | protein_coding | 10 | 125465729 | 125699783 | CPXM2     |
| ENSG00000121900 | 7.593829938 | 6.984522608 | protein_coding | 1  | 33360195  | 33367039  | TMEM54    |
| ENSG00000121903 | 5.472368541 | 5.259915406 | protein_coding | 1  | 33938232  | 33961995  | ZSCAN20   |
| ENSG00000121904 | 0.499066092 | 0.697730409 | protein_coding | 1  | 33979609  | 34631443  | CSMD2     |
| ENSG00000121905 | 1.616589159 | 2.039052734 | protein_coding | 1  | 33351595  | 33364042  | HPCA      |
| ENSG00000121931 | 8.183497283 | 8.253299769 | protein_coding | 1  | 111489807 | 111506701 | LRIF1     |
| ENSG00000121940 | 8.504022011 | 8.802929991 | protein_coding | 1  | 109472130 | 109506111 | CLCC1     |
| ENSG00000121957 | 8.032273249 | 7.883239271 | protein_coding | 1  | 109417972 | 109473044 | GPSM2     |
| ENSG00000121964 | 7.119373418 | 6.811590016 | protein_coding | 2  | 144703321 | 145090135 | GTDC1     |
| ENSG00000121966 | 0           | 0.390640832 | protein_coding | 2  | 136871919 | 136875735 | CXCR4     |
| ENSG00000121988 | 7.049074049 | 6.815578497 | protein_coding | 2  | 135894486 | 136288806 | ZRANB3    |
| ENSG00000121989 | 6.502803968 | 6.167968749 | protein_coding | 2  | 148602086 | 148688393 | ACVR2A    |
| ENSG00000122008 | 7.757079669 | 7.568048738 | protein_coding | 5  | 74807581  | 74896969  | POLK      |
| ENSG00000122026 | 6.350376764 | 5.709041716 | protein_coding | 13 | 27825446  | 27830828  | RPL21     |
| ENSG00000122033 | 6.94645393  | 6.549526374 | protein_coding | 13 | 28009776  | 28024739  | MTIF3     |
| ENSG00000122034 | 9.221529789 | 8.598211347 | protein_coding | 13 | 27998681  | 28009958  | GTF3A     |
| ENSG00000122035 | 3.652182994 | 3.279072565 | protein_coding | 13 | 27844464  | 27847827  | RASL11A   |
| ENSG00000122042 | 7.575190993 | 7.234379288 | protein_coding | 13 | 30338508  | 30424821  | UBL3      |
| ENSG00000122068 | 9.185117095 | 9.162882465 | protein_coding | 3  | 197464050 | 197511317 | FYTTD1    |
| ENSG00000122085 | 7.734859118 | 7.575124073 | protein_coding | 2  | 242014469 | 242041747 | MTERFD2   |
| ENSG00000122122 | 1.16343121  | 0.390640832 | protein_coding | X  | 128913894 | 128929177 | SASH3     |
| ENSG00000122126 | 9.336667406 | 9.640299997 | protein_coding | X  | 128673826 | 128726538 | OCRL      |
| ENSG00000122133 | 4.642199401 | 4.528525526 | protein_coding | 9  | 138453602 | 138458801 | PAEP      |
| ENSG00000122140 | 10.19307491 | 10.0814915  | protein_coding | 9  | 138391830 | 138396519 | MRPS2     |
| ENSG00000122188 | 0.499066092 | 0           | protein_coding | 1  | 203734304 | 203745361 | LAX1      |
| ENSG00000122194 | 0.499066092 | 0           | protein_coding | 6  | 161123270 | 161174338 | PLG       |
| ENSG00000122203 | 9.502033728 | 9.239845842 | protein_coding | 5  | 175773064 | 175788971 | KIAA1191  |
| ENSG00000122218 | 12.04653826 | 11.92084068 | protein_coding | 1  | 160259063 | 160313190 | COPA      |
| ENSG00000122224 | 0.499066092 | 0           | protein_coding | 1  | 160765896 | 160798045 | LY9       |
| ENSG00000122257 | 9.728365606 | 9.779529137 | protein_coding | 16 | 24549014  | 24584184  | RBBP6     |
| ENSG00000122299 | 9.290757201 | 9.406451268 | protein_coding | 16 | 11844442  | 11891099  | ZC3H7A    |
| ENSG00000122335 | 5.977159882 | 6.737844962 | protein_coding | 6  | 158530536 | 158589312 | SERAC1    |
| ENSG00000122359 | 10.59501123 | 10.18686154 | protein_coding | 10 | 81910645  | 81965433  | ANXA11    |
| ENSG00000122367 | 3.077135474 | 4.319727133 | protein_coding | 10 | 88426549  | 88495825  | LDB3      |
| ENSG00000122376 | 7.81647827  | 8.223589663 | protein_coding | 10 | 88854953  | 88951225  | FAM35A    |
| ENSG00000122378 | 7.003331296 | 7.237355663 | protein_coding | 10 | 82167585  | 82192753  | FAM213A   |
| ENSG00000122386 | 7.842689815 | 8.043160634 | protein_coding | 16 | 3162561   | 3170518   | ZNF205    |
| ENSG00000122390 | 9.507778518 | 9.511607983 | protein_coding | 16 | 3493682   | 3536960   | NAA60     |
| ENSG00000122406 | 11.89117065 | 12.24248605 | protein_coding | 1  | 93297597  | 93307481  | RPL5      |
| ENSG00000122417 | 7.90122817  | 8.265014588 | protein_coding | 1  | 86786611  | 86862025  | ODF2L     |
| ENSG00000122420 | 1.16343121  | 1.925536307 | protein_coding | 1  | 78769568  | 79005434  | PTGFR     |
| ENSG00000122432 | 0           | 1.925536307 | pseudogene     | 1  | 84971974  | 85031877  | SPATA1    |
| ENSG00000122435 | 6.050961887 | 6.414040573 | protein_coding | 1  | 100598706 | 100616053 | CCDC76    |
| ENSG00000122477 | 2.10647801  | 1.667587519 | protein_coding | 1  | 100614409 | 100643771 | LRR39     |
| ENSG00000122481 | 5.718698586 | 6.445267191 | protein_coding | 1  | 95699711  | 95712781  | RWDD3     |
| ENSG00000122482 | 8.074911866 | 8.673761454 | protein_coding | 1  | 91380859  | 91487829  | ZNF644    |
| ENSG00000122483 | 6.733233509 | 7.019522872 | protein_coding | 1  | 93645476  | 93744287  | CCDC18    |
| ENSG00000122484 | 6.975172889 | 7.182818183 | protein_coding | 1  | 92764522  | 92853730  | RPAP2     |
| ENSG00000122490 | 8.750975986 | 8.323603978 | protein_coding | 18 | 77662420  | 77711664  | PQLC1     |
| ENSG00000122497 | 5.91922012  | 6.264499759 | protein_coding | 1  | 148003642 | 148025863 | NBPF14    |
| ENSG00000122507 | 7.374222747 | 6.995112131 | protein_coding | 7  | 33168856  | 33645680  | BBS9      |
| ENSG00000122512 | 7.030950614 | 7.033288635 | protein_coding | 7  | 6012870   | 6048756   | PMS2      |
| ENSG00000122515 | 11.87839906 | 11.15313485 | protein_coding | 7  | 44788180  | 44809477  | ZMIZ2     |
| ENSG00000122543 | 0.499066092 | 1.802319292 | protein_coding | 7  | 5919458   | 5925993   | OCM       |
| ENSG00000122545 | 10.30806544 | 10.414292   | protein_coding | 7  | 35840542  | 35944917  | 7-sep     |
| ENSG00000122547 | 6.793601635 | 5.700439663 | protein_coding | 7  | 36192758  | 36341152  | EEP11     |
| ENSG00000122548 | 0           | 0.390640832 | protein_coding | 7  | 26572740  | 26578407  | KIAA0087  |
| ENSG00000122550 | 8.417730894 | 8.282410365 | protein_coding | 7  | 23145353  | 23215040  | KLHL7     |
| ENSG00000122557 | 8.35173048  | 7.83885796  | protein_coding | 7  | 35672269  | 35734745  | HERPUD2   |
| ENSG00000122565 | 10.94273465 | 10.90012121 | protein_coding | 7  | 26240782  | 26252976  | CBX3      |
| ENSG00000122566 | 13.61577736 | 13.42479433 | protein_coding | 7  | 26229547  | 26241149  | HNRNPA2B1 |

|                 |             |             |                |    |           |           |          |
|-----------------|-------------|-------------|----------------|----|-----------|-----------|----------|
| ENSG00000122574 | 4.491309013 | 1.518964905 | protein_coding | 7  | 29846102  | 29956682  | WIPF3    |
| ENSG00000122591 | 9.942255804 | 9.572977394 | protein_coding | 7  | 22980878  | 23053749  | FAM126A  |
| ENSG00000122592 | 0.499066092 | 0.950786998 | protein_coding | 7  | 27193335  | 27197555  | HOXA7    |
| ENSG00000122641 | 8.967738537 | 9.832648794 | protein_coding | 7  | 41724712  | 41742706  | INHBA    |
| ENSG00000122642 | 10.02413132 | 9.797285822 | protein_coding | 7  | 32997017  | 33046543  | FKBP9    |
| ENSG00000122643 | 8.325948295 | 8.269383236 | protein_coding | 7  | 33053742  | 33102409  | NT5C3    |
| ENSG00000122644 | 8.316627558 | 8.135396417 | protein_coding | 7  | 12726481  | 12730559  | ARL4A    |
| ENSG00000122674 | 6.548110424 | 6.037446454 | protein_coding | 7  | 5938356   | 5965605   | CCZ1     |
| ENSG00000122678 | 7.692250012 | 7.668495823 | protein_coding | 7  | 44111846  | 44122139  | POLM     |
| ENSG00000122687 | 8.973680846 | 8.714915547 | protein_coding | 7  | 2273866   | 2281840   | FTSJ2    |
| ENSG00000122692 | 9.195324263 | 9.065760854 | protein_coding | 9  | 33041762  | 33076665  | SMU1     |
| ENSG00000122694 | 6.095241663 | 6.365895578 | protein_coding | 9  | 36136730  | 36163910  | GLIPR2   |
| ENSG00000122696 | 7.062518763 | 6.877938671 | protein_coding | 9  | 37879400  | 37904350  | M CART1  |
| ENSG00000122705 | 9.731875952 | 10.09303901 | protein_coding | 9  | 36190853  | 36304778  | CLTA     |
| ENSG00000122707 | 6.320845526 | 6.535085617 | protein_coding | 9  | 36036430  | 36124448  | RECK     |
| ENSG00000122711 | 0           | 0.950786998 | protein_coding | 9  | 33218363  | 33248565  | SPINK4   |
| ENSG00000122729 | 10.56147155 | 10.66697623 | protein_coding | 9  | 32384601  | 32450834  | ACO1     |
| ENSG00000122733 | 0.499066092 | 1.518964905 | protein_coding | 9  | 34957484  | 34984679  | KIAA1045 |
| ENSG00000122735 | 2.57521082  | 3.570966319 | protein_coding | 9  | 34457412  | 34520982  | DNAI1    |
| ENSG00000122741 | 8.325948295 | 8.305283181 | protein_coding | 9  | 37800499  | 37867663  | DCAF10   |
| ENSG00000122756 | 0           | 0.697730409 | protein_coding | 9  | 34551430  | 34590121  | CNTFR    |
| ENSG00000122778 | 8.059349131 | 7.953699568 | protein_coding | 7  | 138516126 | 138666064 | KIAA1549 |
| ENSG00000122779 | 10.60805898 | 10.15416199 | protein_coding | 7  | 138144953 | 138274738 | TRIM24   |
| ENSG00000122783 | 8.199812472 | 8.253299769 | protein_coding | 7  | 134777115 | 134855547 | C7orf49  |
| ENSG00000122786 | 11.13343133 | 11.31050189 | protein_coding | 7  | 134429003 | 134655479 | CALD1    |
| ENSG00000122787 | 1.16343121  | 0.950786998 | protein_coding | 7  | 137687070 | 137802732 | AKR1D1   |
| ENSG00000122852 | 0.499066092 | 0           | protein_coding | 10 | 81370695  | 81375197  | SFTPA1   |
| ENSG00000122861 | 11.01712264 | 8.983949389 | protein_coding | 10 | 75668935  | 75677255  | PLAU     |
| ENSG00000122862 | 6.25990527  | 4.048652948 | protein_coding | 10 | 70847862  | 70864567  | SRGN     |
| ENSG00000122863 | 9.672468519 | 9.214393111 | protein_coding | 10 | 73724123  | 73773322  | CHST3    |
| ENSG00000122870 | 7.464764762 | 7.832967122 | protein_coding | 10 | 60272900  | 60591195  | BICC1    |
| ENSG00000122873 | 9.526494794 | 9.472987904 | protein_coding | 10 | 60028818  | 60049346  | CISD1    |
| ENSG00000122877 | 5.948480845 | 3.279072565 | protein_coding | 10 | 64571756  | 64679660  | EGR2     |
| ENSG00000122882 | 8.495786671 | 8.241489045 | protein_coding | 10 | 74889913  | 74927853  | ECD      |
| ENSG00000122884 | 9.812996626 | 9.747005744 | protein_coding | 10 | 74766975  | 74856732  | P4HA1    |
| ENSG00000122912 | 6.428602508 | 6.142791909 | protein_coding | 10 | 70242521  | 70287231  | SLC25A16 |
| ENSG00000122952 | 9.597483841 | 9.617635386 | protein_coding | 10 | 58116989  | 58121036  | ZWINT    |
| ENSG00000122958 | 9.715657165 | 9.622766057 | protein_coding | 10 | 70883268  | 70932617  | VPS26A   |
| ENSG00000122965 | 8.915598341 | 8.873500326 | protein_coding | 12 | 114254543 | 114404176 | RBM19    |
| ENSG00000122966 | 9.151960225 | 8.910331892 | protein_coding | 12 | 120123595 | 120315095 | CIT      |
| ENSG00000122970 | 6.313367288 | 6.577981353 | protein_coding | 12 | 110562140 | 110656602 | IFT81    |
| ENSG00000122971 | 6.92698535  | 7.138927266 | protein_coding | 12 | 121163538 | 121177811 | ACADS    |
| ENSG00000122986 | 1.616589159 | 1.802319292 | protein_coding | 12 | 111065646 | 111142755 | HVCN1    |
| ENSG00000123009 | 3.603959378 | 3.679994897 | pseudogene     | 12 | 120719940 | 120720632 | NME2P1   |
| ENSG00000123064 | 10.37335233 | 9.975411057 | protein_coding | 12 | 113594979 | 113623284 | DDX54    |
| ENSG00000123066 | 9.494613796 | 8.958022094 | protein_coding | 12 | 116395711 | 116715143 | MED13L   |
| ENSG00000123080 | 7.621344476 | 8.351343215 | protein_coding | 1  | 51426417  | 51440305  | CDKN2C   |
| ENSG00000123091 | 8.914363072 | 9.077434451 | protein_coding | 1  | 51701943  | 51739127  | RNF11    |
| ENSG00000123094 | 7.903720218 | 8.232567113 | protein_coding | 12 | 26111962  | 26232825  | RASSF8   |
| ENSG00000123095 | 7.633406721 | 7.354383726 | protein_coding | 12 | 26272959  | 26278060  | BHLHE41  |
| ENSG00000123096 | 4.593635215 | 2.242360793 | protein_coding | 12 | 26274924  | 26452223  | SSPN     |
| ENSG00000123104 | 8.894453552 | 9.177677745 | protein_coding | 12 | 26490342  | 26986131  | ITPR2    |
| ENSG00000123106 | 7.501423995 | 7.225413142 | protein_coding | 12 | 28286182  | 28732883  | CCDC91   |
| ENSG00000123119 | 1.16343121  | 4.342020395 | protein_coding | 8  | 91803778  | 91971636  | NECAB1   |
| ENSG00000123124 | 8.596266901 | 7.980592361 | protein_coding | 8  | 87354967  | 87490649  | WWP1     |
| ENSG00000123130 | 9.489645889 | 9.931061721 | protein_coding | X  | 23720370  | 23784592  | ACOT9    |
| ENSG00000123131 | 10.0326953  | 10.95403662 | protein_coding | X  | 23682379  | 23704516  | PRDX4    |
| ENSG00000123136 | 10.99771618 | 11.1476082  | protein_coding | 19 | 14519633  | 14530171  | DDX39A   |
| ENSG00000123143 | 11.56375436 | 11.89327141 | protein_coding | 19 | 14544169  | 14582678  | PKN1     |
| ENSG00000123144 | 10.72540341 | 11.43141474 | protein_coding | 19 | 12841455  | 12845529  | C19orf43 |
| ENSG00000123146 | 11.24130516 | 11.33779859 | protein_coding | 19 | 14492213  | 14519531  | CD97     |
| ENSG00000123154 | 8.070482475 | 8.119352325 | protein_coding | 19 | 12777614  | 12786646  | WDR83    |
| ENSG00000123159 | 10.7728634  | 10.58989654 | protein_coding | 19 | 14588572  | 14606944  | GIPC1    |

|                 |             |             |                |    |           |           |          |
|-----------------|-------------|-------------|----------------|----|-----------|-----------|----------|
| ENSG00000123178 | 5.986594255 | 5.393992    | protein_coding | 13 | 50486842  | 50510626  | SPRYD7   |
| ENSG00000123179 | 7.64536895  | 7.170413581 | protein_coding | 13 | 50234859  | 50265623  | EBPL     |
| ENSG00000123191 | 5.637181576 | 5.137803333 | protein_coding | 13 | 52506809  | 52585630  | ATP7B    |
| ENSG00000123200 | 9.551342933 | 8.903789961 | protein_coding | 13 | 46528600  | 46626894  | ZC3H13   |
| ENSG00000123201 | 0.499066092 | 0.950786998 | pseudogene     | 13 | 51568651  | 51654998  | GUCY1B2  |
| ENSG00000123213 | 9.766517491 | 8.961626095 | protein_coding | 5  | 65018023  | 65167553  | NLN      |
| ENSG00000123219 | 7.356139979 | 7.252146121 | protein_coding | 5  | 64813593  | 64858998  | CENPK    |
| ENSG00000123240 | 10.73488119 | 10.57468    | protein_coding | 10 | 13141449  | 13180291  | OPTN     |
| ENSG00000123243 | 0           | 1.16600992  | protein_coding | 10 | 7601232   | 7708961   | ITIH5    |
| ENSG00000123268 | 8.3053626   | 8.049948078 | protein_coding | 12 | 51157493  | 51214905  | ATF1     |
| ENSG00000123297 | 8.407231133 | 9.01636662  | protein_coding | 12 | 58176372  | 58201854  | TSFM     |
| ENSG00000123329 | 0.869158192 | 1.518964905 | protein_coding | 12 | 57866038  | 57882597  | ARHGAP9  |
| ENSG00000123338 | 0.869158192 | 0.950786998 | protein_coding | 12 | 54891495  | 54937726  | NCKAP1L  |
| ENSG00000123342 | 5.360713447 | 5.96747225  | protein_coding | 12 | 56229217  | 56236750  | MMP19    |
| ENSG00000123349 | 9.68845487  | 10.39676134 | protein_coding | 12 | 53689075  | 53693234  | PFDN5    |
| ENSG00000123352 | 8.919297816 | 8.861011175 | protein_coding | 12 | 49760367  | 49921207  | SPATS2   |
| ENSG00000123353 | 7.254372086 | 7.219404604 | protein_coding | 12 | 56211703  | 56215663  | ORMDL2   |
| ENSG00000123358 | 10.12208492 | 3.993387124 | protein_coding | 12 | 52416616  | 52453291  | NR4A1    |
| ENSG00000123360 | 0           | 0.697730409 | protein_coding | 12 | 54943134  | 54973023  | PDE1B    |
| ENSG00000123364 | 6.095241663 | 6.642271819 | protein_coding | 12 | 54332535  | 54340328  | HOXC13   |
| ENSG00000123374 | 9.548956892 | 9.562928737 | protein_coding | 12 | 56360553  | 56366568  | CDK2     |
| ENSG00000123384 | 10.3925533  | 10.85868225 | protein_coding | 12 | 57522276  | 57607134  | LRP1     |
| ENSG00000123388 | 1.616589159 | 1.667587519 | protein_coding | 12 | 54366910  | 54371427  | HOXC11   |
| ENSG00000123395 | 8.312882337 | 8.187110572 | protein_coding | 12 | 52463030  | 52471278  | C12orf44 |
| ENSG00000123405 | 5.588445295 | 4.468996429 | protein_coding | 12 | 54685895  | 54694905  | NFE2     |
| ENSG00000123411 | 6.897280837 | 6.877938671 | protein_coding | 12 | 56401443  | 56432219  | IKZF4    |
| ENSG00000123415 | 7.657232808 | 7.926295939 | protein_coding | 12 | 54558529  | 54582778  | SMUG1    |
| ENSG00000123416 | 10.86781572 | 11.17192425 | protein_coding | 12 | 49521565  | 49525180  | TUBA1B   |
| ENSG00000123427 | 7.334137164 | 7.32390599  | protein_coding | 12 | 58165275  | 58176324  | METTL21B |
| ENSG00000123444 | 6.086493765 | 6.424524724 | protein_coding | 11 | 47593749  | 47600567  | KBTBD4   |
| ENSG00000123453 | 7.90122817  | 7.918899532 | protein_coding | 9  | 136528682 | 136605077 | SARDH    |
| ENSG00000123454 | 4.883502971 | 4.903073497 | protein_coding | 9  | 136501482 | 136524466 | DBH      |
| ENSG00000123472 | 8.278730502 | 8.579568843 | protein_coding | 1  | 47098409  | 47139539  | ATPAF1   |
| ENSG00000123473 | 8.38421606  | 8.628000846 | protein_coding | 1  | 47715811  | 47779819  | STIL     |
| ENSG00000123485 | 9.108333003 | 9.304420832 | protein_coding | 2  | 234742062 | 234763212 | HJURP    |
| ENSG00000123496 | 1.407729925 | 2.652276565 | protein_coding | X  | 114238538 | 114254540 | IL13RA2  |
| ENSG00000123500 | 0.869158192 | 0.390640832 | protein_coding | 6  | 116440086 | 116479910 | COL10A1  |
| ENSG00000123505 | 10.06867432 | 10.31353975 | protein_coding | 6  | 111195973 | 111216916 | AMD1     |
| ENSG00000123545 | 6.456028446 | 7.033288635 | protein_coding | 6  | 97337189  | 97345757  | NDUFAF4  |
| ENSG00000123552 | 6.830742851 | 7.116470702 | protein_coding | 6  | 99880190  | 99969604  | USP45    |
| ENSG00000123560 | 1.16343121  | 1.518964905 | protein_coding | X  | 103028647 | 103047548 | PLP1     |
| ENSG00000123562 | 11.85428416 | 12.18323438 | protein_coding | X  | 102930424 | 102943086 | MORF4L2  |
| ENSG00000123570 | 1.799000381 | 3.532712221 | protein_coding | X  | 103077252 | 103087158 | RAB9B    |
| ENSG00000123572 | 0           | 0.697730409 | protein_coding | X  | 105066536 | 105202602 | NRK      |
| ENSG00000123575 | 9.717783028 | 9.747527757 | protein_coding | X  | 103411301 | 103440583 | FAM199X  |
| ENSG00000123595 | 7.639400234 | 8.652735634 | protein_coding | X  | 13707244  | 13728625  | RAB9A    |
| ENSG00000123600 | 7.870982917 | 7.724721747 | protein_coding | 2  | 172179761 | 172291312 | METTL8   |
| ENSG00000123607 | 7.440941622 | 7.743685008 | protein_coding | 2  | 166713985 | 166810353 | TTC21B   |
| ENSG00000123609 | 8.112022537 | 8.125791388 | protein_coding | 2  | 152126979 | 152146571 | NMI      |
| ENSG00000123610 | 0.869158192 | 1.925536307 | protein_coding | 2  | 152214106 | 152236560 | TNFAIP6  |
| ENSG00000123612 | 0.869158192 | 0.697730409 | protein_coding | 2  | 158388888 | 158485517 | ACVR1C   |
| ENSG00000123636 | 7.319279953 | 7.10998981  | protein_coding | 2  | 160175490 | 160473203 | BAZ2B    |
| ENSG00000123643 | 7.703736051 | 7.621426466 | protein_coding | 5  | 150816607 | 150871942 | SLC36A1  |
| ENSG00000123684 | 9.064459359 | 8.913126522 | protein_coding | 1  | 211916799 | 212004114 | LPGAT1   |
| ENSG00000123685 | 4.712111592 | 4.7279204   | protein_coding | 1  | 212859760 | 212873327 | BATF3    |
| ENSG00000123689 | 9.000704568 | 9.075772566 | protein_coding | 1  | 209848765 | 209849733 | G0S2     |
| ENSG00000123728 | 8.946141254 | 8.750768196 | protein_coding | X  | 131337053 | 131353471 | RAP2C    |
| ENSG00000123737 | 8.385999544 | 8.512355001 | protein_coding | 4  | 122722472 | 122738176 | EXOSC9   |
| ENSG00000123739 | 7.071412799 | 6.984522608 | protein_coding | 4  | 110631145 | 110651233 | PLA2G12A |
| ENSG00000123810 | 5.286269488 | 5.923798455 | protein_coding | 19 | 41860322  | 41870078  | B9D2     |
| ENSG00000123815 | 6.305850085 | 6.408769788 | protein_coding | 19 | 41197434  | 41222790  | ADCK4    |
| ENSG00000123836 | 7.292905885 | 6.690849666 | protein_coding | 1  | 207222801 | 207254369 | PFKFB2   |
| ENSG00000123870 | 5.718698586 | 5.832272499 | pseudogene     | 19 | 53095291  | 53100660  | ZNF137P  |

|                 |             |             |                |    |           |           |          |
|-----------------|-------------|-------------|----------------|----|-----------|-----------|----------|
| ENSG00000123892 | 4.381167248 | 1.802319292 | protein_coding | 11 | 87846431  | 87908635  | RAB38    |
| ENSG00000123901 | 1.799000381 | 2.851901313 | protein_coding | 11 | 94110477  | 94134585  | GPR83    |
| ENSG00000123908 | 8.489164384 | 8.363653959 | protein_coding | 8  | 141541264 | 141645718 | EIF2C2   |
| ENSG00000123933 | 9.191250057 | 9.495538149 | protein_coding | 4  | 2249159   | 2264021   | MXD4     |
| ENSG00000123965 | 4.062237333 | 4.226940739 | pseudogene     | 7  | 74306894  | 74366314  | PMS2P5   |
| ENSG00000123975 | 9.830784156 | 10.0823194  | protein_coding | 9  | 91926113  | 91931618  | CKS2     |
| ENSG00000123977 | 3.950976309 | 3.608232228 | protein_coding | 2  | 228735770 | 228789060 | WDR69    |
| ENSG00000123983 | 10.68287268 | 9.842944292 | protein_coding | 2  | 223725652 | 223809357 | ACSL3    |
| ENSG00000123989 | 11.23290649 | 11.12689325 | protein_coding | 2  | 220403669 | 220408509 | CHPF     |
| ENSG00000123992 | 9.850294221 | 9.674741242 | protein_coding | 2  | 220238268 | 220586393 | DNPEP    |
| ENSG00000123999 | 3.393122761 | 4.342020395 | protein_coding | 2  | 220433884 | 220440435 | INHA     |
| ENSG00000124006 | 9.255095676 | 9.496780665 | protein_coding | 2  | 220415451 | 220436581 | OBSL1    |
| ENSG00000124067 | 9.260938843 | 9.36078013  | protein_coding | 16 | 67977377  | 68002597  | SLC12A4  |
| ENSG00000124074 | 7.765324926 | 8.202422444 | protein_coding | 16 | 67696848  | 67700667  | C16orf48 |
| ENSG00000124091 | 1.799000381 | 2.501982735 | protein_coding | 20 | 55066548  | 55100981  | GCNT7    |
| ENSG00000124092 | 0.499066092 | 0.697730409 | protein_coding | 20 | 56071021  | 56100708  | CTCFL    |
| ENSG00000124097 | 0.869158192 | 0.390640832 | pseudogene     | 20 | 56063448  | 56064083  | HMGB1P1  |
| ENSG00000124098 | 8.492479328 | 8.652735634 | protein_coding | 20 | 54933971  | 54943719  | FAM210B  |
| ENSG00000124102 | 4.903563137 | 5.283144778 | protein_coding | 20 | 43803517  | 43805185  | PI3      |
| ENSG00000124103 | 2.471521042 | 0.697730409 | protein_coding | 20 | 55092243  | 55101198  | FAM209A  |
| ENSG00000124104 | 7.07583934  | 7.522414019 | protein_coding | 20 | 44462449  | 44471914  | SNX21    |
| ENSG00000124107 | 8.54291017  | 8.141764426 | protein_coding | 20 | 43880880  | 43883205  | SLPI     |
| ENSG00000124116 | 5.107569429 | 6.970281236 | protein_coding | 20 | 44376583  | 44420571  | WFDC3    |
| ENSG00000124120 | 8.883132512 | 8.791837833 | protein_coding | 20 | 43104526  | 43123244  | TTPAL    |
| ENSG00000124126 | 7.102117104 | 3.679994897 | protein_coding | 20 | 47240790  | 47444420  | PREX1    |
| ENSG00000124134 | 3.78787645  | 4.29708397  | protein_coding | 20 | 43720951  | 43729753  | KCNS1    |
| ENSG00000124140 | 3.393122761 | 3.813624741 | protein_coding | 20 | 44650329  | 44688789  | SLC12A5  |
| ENSG00000124143 | 7.886184801 | 8.99190196  | protein_coding | 20 | 37230577  | 37279678  | ARHGAP40 |
| ENSG00000124145 | 12.2990708  | 12.03972983 | protein_coding | 20 | 43953928  | 43977064  | SDC4     |
| ENSG00000124151 | 10.14069086 | 9.794762494 | protein_coding | 20 | 46130601  | 46285621  | NCOA3    |
| ENSG00000124155 | 10.46605656 | 11.10016547 | protein_coding | 20 | 44044707  | 44054884  | PIGT     |
| ENSG00000124159 | 2.35979773  | 2.334191469 | protein_coding | 20 | 43922085  | 43937169  | MATN4    |
| ENSG00000124160 | 9.020358234 | 9.178452256 | protein_coding | 20 | 44689624  | 44718591  | NCOA5    |
| ENSG00000124164 | 9.756212088 | 9.483680566 | protein_coding | 20 | 56964178  | 57026157  | VAPB     |
| ENSG00000124171 | 8.092494681 | 7.246248121 | protein_coding | 20 | 49348081  | 49373332  | PARD6B   |
| ENSG00000124172 | 9.772665583 | 10.38338814 | protein_coding | 20 | 57600522  | 57607437  | ATP5E    |
| ENSG00000124177 | 8.954578658 | 9.149514732 | protein_coding | 20 | 40030741  | 40247133  | CHD6     |
| ENSG00000124181 | 9.205459721 | 9.137615924 | protein_coding | 20 | 39765600  | 39804361  | PLCG1    |
| ENSG00000124191 | 9.998712996 | 9.277202279 | protein_coding | 20 | 42543492  | 42698256  | TOX2     |
| ENSG00000124193 | 10.91829414 | 11.00709988 | protein_coding | 20 | 42086568  | 42092245  | SRSF6    |
| ENSG00000124194 | 0.499066092 | 2.334191469 | protein_coding | 20 | 42875887  | 42909013  | GDAP1L1  |
| ENSG00000124198 | 9.877806407 | 10.03862623 | protein_coding | 20 | 47538275  | 47653230  | ARFGEF2  |
| ENSG00000124201 | 10.41062624 | 10.49826541 | protein_coding | 20 | 47826982  | 47894963  | ZNF1     |
| ENSG00000124207 | 11.86631214 | 11.80248922 | protein_coding | 20 | 47662838  | 47713489  | CSE1L    |
| ENSG00000124209 | 8.966547133 | 8.857146507 | protein_coding | 20 | 56884752  | 56942563  | RAB22A   |
| ENSG00000124212 | 1.16343121  | 0.390640832 | protein_coding | 20 | 48123992  | 48184683  | PTGIS    |
| ENSG00000124214 | 10.99362791 | 10.80176251 | protein_coding | 20 | 47729878  | 47804904  | STAU1    |
| ENSG00000124215 | 3.950976309 | 4.29708397  | protein_coding | 20 | 58533471  | 58609066  | CDH26    |
| ENSG00000124216 | 8.929116952 | 8.458531597 | protein_coding | 20 | 48599536  | 48605423  | SNAI1    |
| ENSG00000124217 | 7.437505974 | 7.258020107 | protein_coding | 20 | 49575363  | 49577820  | MOCS3    |
| ENSG00000124222 | 10.09453648 | 9.698154036 | protein_coding | 20 | 57226328  | 57254582  | STX16    |
| ENSG00000124224 | 7.132181536 | 7.016060809 | protein_coding | 20 | 56806188  | 56884495  | PPP4R1L  |
| ENSG00000124225 | 10.04007652 | 8.660517685 | protein_coding | 20 | 56223448  | 56286592  | PMEPA1   |
| ENSG00000124226 | 9.527303063 | 9.639175184 | protein_coding | 20 | 48552945  | 48570429  | RNF114   |
| ENSG00000124227 | 0           | 0.390640832 | protein_coding | 20 | 56793551  | 56803709  | ANKRD60  |
| ENSG00000124228 | 9.94104316  | 9.807835867 | protein_coding | 20 | 47835832  | 47860614  | DDX27    |
| ENSG00000124232 | 0           | 0.390640832 | protein_coding | 20 | 43935491  | 43945803  | RBPJL    |
| ENSG00000124233 | 0           | 0.390640832 | protein_coding | 20 | 43835638  | 43838413  | SEMG1    |
| ENSG00000124243 | 6.820228284 | 6.870289474 | protein_coding | 20 | 49411431  | 49493714  | BCAS4    |
| ENSG00000124249 | 1.616589159 | 1.16600992  | protein_coding | 20 | 43374421  | 43379675  | KCNK15   |
| ENSG00000124251 | 3.554067925 | 3.32456471  | protein_coding | 20 | 44002526  | 44036529  | TP53TG5  |
| ENSG00000124253 | 0.499066092 | 0           | protein_coding | 20 | 56131260  | 56141513  | PCK1     |
| ENSG00000124256 | 0.499066092 | 0.390640832 | protein_coding | 20 | 56178902  | 56195632  | ZBP1     |



|                 |             |             |                |    |           |           |           |
|-----------------|-------------|-------------|----------------|----|-----------|-----------|-----------|
| ENSG00000124257 | 4.261916566 | 4.604259349 | protein_coding | 20 | 44517264  | 44519926  | NEURL2    |
| ENSG00000124275 | 9.782177506 | 9.63410264  | protein_coding | 5  | 7851299   | 7906138   | MTRR      |
| ENSG00000124279 | 7.734859118 | 7.556178852 | protein_coding | 5  | 7859272   | 7869150   | FASTKD3   |
| ENSG00000124299 | 9.396283191 | 9.589959321 | protein_coding | 19 | 33877855  | 34012799  | PEPD      |
| ENSG00000124313 | 8.497437504 | 8.715982854 | protein_coding | X  | 53262058  | 53350522  | IQSEC2    |
| ENSG00000124333 | 9.290757201 | 9.504213373 | protein_coding | X  | 155110956 | 155173433 | VAMP7     |
| ENSG00000124334 | 3.603959378 | 3.570966319 | protein_coding | X  | 155227246 | 155251689 | IL9R      |
| ENSG00000124356 | 8.860220382 | 8.899098923 | protein_coding | 2  | 74056086  | 74100786  | STAMBP    |
| ENSG00000124357 | 8.148202495 | 8.983949389 | protein_coding | 2  | 71291474  | 71306935  | NAGK      |
| ENSG00000124370 | 5.158541613 | 5.496926774 | protein_coding | 2  | 71336814  | 71357369  | MCEE      |
| ENSG00000124374 | 5.223818625 | 5.536128679 | protein_coding | 2  | 71409869  | 71454213  | PAIP2B    |
| ENSG00000124380 | 6.793601635 | 7.119700263 | protein_coding | 2  | 70120692  | 70132707  | SNRNP27   |
| ENSG00000124383 | 8.628263112 | 8.520929986 | protein_coding | 2  | 71357444  | 71377231  | MPHOSPH10 |
| ENSG00000124391 | 1.407729925 | 0.390640832 | protein_coding | 16 | 88704999  | 88706881  | IL17C     |
| ENSG00000124406 | 4.903563137 | 1.518964905 | protein_coding | 4  | 42410390  | 42659122  | ATP8A1    |
| ENSG00000124422 | 12.21189204 | 12.30393206 | protein_coding | 17 | 20902906  | 20947073  | USP22     |
| ENSG00000124429 | 1.616589159 | 0           | protein_coding | X  | 84532402  | 84634748  | POF1B     |
| ENSG00000124440 | 1.407729925 | 3.081239798 | protein_coding | 19 | 46800303  | 46846690  | HIF3A     |
| ENSG00000124444 | 6.050961887 | 6.403479675 | protein_coding | 19 | 44100544  | 44105309  | ZNF576    |
| ENSG00000124455 | 0.499066092 | 1.925536307 | protein_coding | 19 | 44080952  | 44083238  |           |
| ENSG00000124459 | 7.997697782 | 8.206984494 | protein_coding | 19 | 44416776  | 44439411  | ZNF45     |
| ENSG00000124466 | 7.748787017 | 4.693656882 | protein_coding | 19 | 43964946  | 43969831  | LYPD3     |
| ENSG00000124467 | 2.10647801  | 3.279072565 | protein_coding | 19 | 43256838  | 43269848  | PSG8      |
| ENSG00000124469 | 0           | 0.390640832 | protein_coding | 19 | 43084393  | 43099082  | CEACAM8   |
| ENSG00000124479 | 0           | 0.390640832 | protein_coding | X  | 43808022  | 43832750  | NDP       |
| ENSG00000124486 | 11.73638147 | 11.68259048 | protein_coding | X  | 40944888  | 41092185  | USP9X     |
| ENSG00000124491 | 0           | 0.390640832 | protein_coding | 6  | 6144318   | 6321246   | F13A1     |
| ENSG00000124493 | 0.499066092 | 1.16600992  | protein_coding | 6  | 33989628  | 34123399  | GRM4      |
| ENSG00000124496 | 8.465744027 | 7.436965343 | protein_coding | 6  | 42192669  | 42419789  | TRERF1    |
| ENSG00000124507 | 0           | 0.390640832 | protein_coding | 6  | 34433916  | 34503006  | PACIN1    |
| ENSG00000124508 | 7.186405829 | 8.101495266 | protein_coding | 6  | 26383324  | 26395102  | BTN2A2    |
| ENSG00000124523 | 7.049074049 | 7.951888765 | protein_coding | 6  | 13574826  | 13612524  | SIRT5     |
| ENSG00000124529 | 0.869158192 | 1.353254395 | protein_coding | 6  | 26027124  | 26027480  | HIST1H4B  |
| ENSG00000124532 | 8.3352092   | 8.548751381 | protein_coding | 6  | 24403153  | 24425810  | MRS2      |
| ENSG00000124535 | 9.420848964 | 9.484307085 | protein_coding | 6  | 2765648   | 2786927   | WRNIP1    |
| ENSG00000124541 | 9.387407331 | 9.422231406 | protein_coding | 6  | 42989383  | 42997335  | RRP36     |
| ENSG00000124549 | 4.962122459 | 5.466810074 | pseudogene     | 6  | 26421619  | 26431928  | BTN2A3P   |
| ENSG00000124562 | 9.582785382 | 10.27531537 | protein_coding | 6  | 34725183  | 34741571  | SNRPC     |
| ENSG00000124570 | 10.22779886 | 10.13074314 | protein_coding | 6  | 2948393   | 2972399   | SERPINB6  |
| ENSG00000124571 | 10.44096868 | 10.30469907 | protein_coding | 6  | 43490072  | 43543812  | XPO5      |
| ENSG00000124574 | 9.232475031 | 9.587045627 | protein_coding | 6  | 43395104  | 43418168  | ABCC10    |
| ENSG00000124575 | 3.077135474 | 2.721932731 | protein_coding | 6  | 26234440  | 26235216  | HIST1H1D  |
| ENSG00000124587 | 7.603059879 | 7.243290054 | protein_coding | 6  | 42931608  | 42946958  | PEX6      |
| ENSG00000124588 | 8.787867896 | 8.896276962 | protein_coding | 6  | 2988221   | 3019996   | NQO2      |
| ENSG00000124593 | 4.097495944 | 4.976162367 | protein_coding | 6  | 41748087  | 41757879  | PRICKLE4  |
| ENSG00000124596 | 7.102117104 | 7.298481685 | protein_coding | 6  | 41001366  | 41065526  | C6orf130  |
| ENSG00000124602 | 5.316509574 | 5.988823159 | protein_coding | 6  | 40994772  | 41006928  | UNC5CL    |
| ENSG00000124608 | 7.740446424 | 7.747865429 | protein_coding | 6  | 44267391  | 44281063  | AARS2     |
| ENSG00000124610 | 2.10647801  | 1.667587519 | protein_coding | 6  | 26017260  | 26018040  | HIST1H1A  |
| ENSG00000124613 | 7.30049066  | 7.309836726 | protein_coding | 6  | 27342394  | 27371683  | ZNF391    |
| ENSG00000124614 | 9.953725374 | 10.68070787 | protein_coding | 6  | 34385231  | 34393902  | RPS10     |
| ENSG00000124615 | 0.499066092 | 0.390640832 | protein_coding | 6  | 39867354  | 39902290  | MOCOS1    |
| ENSG00000124635 | 4.942865586 | 4.826083323 | protein_coding | 6  | 27094058  | 27100541  | HIST1H2BJ |
| ENSG00000124641 | 8.3053626   | 8.486319932 | protein_coding | 6  | 41873092  | 41888877  | MED20     |
| ENSG00000124657 | 0.499066092 | 2.242360793 | protein_coding | 6  | 27925019  | 27925960  | OR2B6     |
| ENSG00000124659 | 7.621344476 | 8.330588949 | protein_coding | 6  | 42712219  | 42714558  | TBCC      |
| ENSG00000124664 | 2.671945279 | 0.950786998 | protein_coding | 6  | 34505579  | 34524110  | SPDEF     |
| ENSG00000124678 | 0.499066092 | 0.950786998 | protein_coding | 6  | 35085848  | 35116387  | TCP11     |
| ENSG00000124688 | 7.35977471  | 7.582164879 | protein_coding | 6  | 43597277  | 43608689  | MAD2L1BP  |
| ENSG00000124693 | 2.10647801  | 1.802319292 | protein_coding | 6  | 26031817  | 26032288  | HIST1H3B  |
| ENSG00000124701 | 1.407729925 | 2.652276565 | protein_coding | 6  | 41021043  | 41032465  | APOBEC2   |
| ENSG00000124702 | 10.14438343 | 10.53863841 | protein_coding | 6  | 42981951  | 42989036  | KLHDC3    |
| ENSG00000124713 | 1.616589159 | 2.039052734 | protein_coding | 6  | 42928496  | 42931618  | GNMT      |

|                 |             |             |                |    |           |           |          |
|-----------------|-------------|-------------|----------------|----|-----------|-----------|----------|
| ENSG00000124731 | 0.499066092 | 0.697730409 | protein_coding | 6  | 41243712  | 41254457  | TREM1    |
| ENSG00000124733 | 8.329659793 | 9.112709611 | protein_coding | 6  | 42979832  | 42981706  | MEA1     |
| ENSG00000124743 | 2.471521042 | 3.232099092 | protein_coding | 6  | 53512699  | 53530506  | KLHL31   |
| ENSG00000124749 | 1.16343121  | 0           | protein_coding | 6  | 55921388  | 56258892  | COL21A1  |
| ENSG00000124762 | 9.9349646   | 9.12320659  | protein_coding | 6  | 36644305  | 36655116  | CDKN1A   |
| ENSG00000124766 | 8.357195795 | 8.595894166 | protein_coding | 6  | 21593972  | 21598847  | SOX4     |
| ENSG00000124767 | 11.2306751  | 11.33953089 | protein_coding | 6  | 38643719  | 38670917  | GLO1     |
| ENSG00000124772 | 4.821592551 | 4.547834947 | protein_coding | 6  | 36708552  | 36807778  | CPNE5    |
| ENSG00000124782 | 9.51676008  | 8.948064416 | protein_coding | 6  | 7107830   | 7252213   | RREB1    |
| ENSG00000124783 | 11.27104537 | 11.24343157 | protein_coding | 6  | 7268539   | 7347679   | SSR1     |
| ENSG00000124784 | 8.380642463 | 8.581912372 | protein_coding | 6  | 7389729   | 7418270   | RIOK1    |
| ENSG00000124785 | 1.616589159 | 1.518964905 | protein_coding | 6  | 5998232   | 6007200   | NRN1     |
| ENSG00000124786 | 7.488200893 | 8.106387334 | protein_coding | 6  | 8413301   | 8435794   | SLC35B3  |
| ENSG00000124787 | 7.190493718 | 7.556178852 | protein_coding | 6  | 4994966   | 5004297   | RPP40    |
| ENSG00000124788 | 8.737069306 | 8.941691738 | protein_coding | 6  | 16299343  | 16761722  | ATXN1    |
| ENSG00000124789 | 10.68830327 | 10.75268144 | protein_coding | 6  | 17615269  | 17706818  | NUP153   |
| ENSG00000124795 | 10.93331302 | 11.33363257 | protein_coding | 6  | 18224099  | 18265054  | DEK      |
| ENSG00000124802 | 7.947856304 | 8.492561507 | protein_coding | 6  | 8015959   | 8102811   | EEF1E1   |
| ENSG00000124813 | 9.203438318 | 8.880180737 | protein_coding | 6  | 45295894  | 45518818  | RUNX2    |
| ENSG00000124827 | 0           | 0.390640832 | protein_coding | 6  | 10873456  | 10882174  | GCM2     |
| ENSG00000124831 | 10.65133646 | 10.20635918 | protein_coding | 2  | 238536219 | 238722325 | LRRFIP1  |
| ENSG00000124835 | 0           | 0.697730409 | antisense      | 2  | 237957242 | 237964810 |          |
| ENSG00000124839 | 8.12275821  | 7.18590274  | protein_coding | 2  | 238482965 | 238510257 | RAB17    |
| ENSG00000124875 | 8.674235392 | 10.3431992  | protein_coding | 4  | 74702214  | 74714781  | CXCL6    |
| ENSG00000124882 | 9.079967361 | 4.075511708 | protein_coding | 4  | 75230860  | 75254468  | EREG     |
| ENSG00000124915 | 0.499066092 | 0.390640832 | lincRNA        | 11 | 61513965  | 61525127  |          |
| ENSG00000124920 | 7.827020104 | 7.346135265 | protein_coding | 11 | 61520114  | 61555990  | C11orf9  |
| ENSG00000124942 | 13.1218216  | 12.29895485 | protein_coding | 11 | 62201016  | 62323719  | AHNAK    |
| ENSG00000125037 | 8.197783135 | 8.603988071 | protein_coding | 3  | 10004221  | 10052800  | TMEM111  |
| ENSG00000125046 | 2.762599152 | 2.652276565 | protein_coding | 3  | 8661086   | 8786726   | C3orf32  |
| ENSG00000125084 | 0.499066092 | 0           | protein_coding | 12 | 49372398  | 49375459  | WNT1     |
| ENSG00000125089 | 8.382430368 | 7.931818465 | protein_coding | 4  | 8183799   | 8242830   | SH3TC1   |
| ENSG00000125107 | 11.45560255 | 11.44933421 | protein_coding | 16 | 58553855  | 58663790  | CNOT1    |
| ENSG00000125122 | 4.131913373 | 4.7279204   | protein_coding | 16 | 67241042  | 67260951  | LRRRC29  |
| ENSG00000125124 | 8.53328596  | 9.388489822 | protein_coding | 16 | 56500748  | 56554195  | BBS2     |
| ENSG00000125144 | 0.499066092 | 0.390640832 | protein_coding | 16 | 56700643  | 56701977  | MT1G     |
| ENSG00000125148 | 11.36038867 | 12.73346486 | protein_coding | 16 | 56642111  | 56643409  | MT2A     |
| ENSG00000125149 | 8.225937332 | 8.468698482 | protein_coding | 16 | 67143861  | 67182442  | C16orf70 |
| ENSG00000125166 | 11.22196453 | 11.47887128 | protein_coding | 16 | 58741035  | 58768261  | GOT2     |
| ENSG00000125170 | 6.386460534 | 6.708116507 | protein_coding | 16 | 57505863  | 57521239  | DOK4     |
| ENSG00000125245 | 0           | 1.16600992  | protein_coding | 13 | 99906968  | 99913998  | GPR18    |
| ENSG00000125246 | 5.967663407 | 5.855704078 | protein_coding | 13 | 100258919 | 100549387 | CLYBL    |
| ENSG00000125247 | 7.093410923 | 7.32390599  | protein_coding | 13 | 101256181 | 101327347 | TMTC4    |
| ENSG00000125249 | 8.197783135 | 8.083414408 | protein_coding | 13 | 98086476  | 98120244  | RAP2A    |
| ENSG00000125257 | 8.613115289 | 8.422372441 | protein_coding | 13 | 95672083  | 95953687  | ABCC4    |
| ENSG00000125266 | 9.485492858 | 8.557113361 | protein_coding | 13 | 107142093 | 107187462 | EFNB2    |
| ENSG00000125285 | 2.928422289 | 0           | protein_coding | 13 | 95361886  | 95364389  | SOX21    |
| ENSG00000125304 | 10.48656567 | 10.60380154 | protein_coding | 13 | 100153671 | 100215645 | TM9SF2   |
| ENSG00000125319 | 7.132181536 | 7.119700263 | protein_coding | 17 | 42219274  | 42239844  | C17orf53 |
| ENSG00000125337 | 5.967663407 | 5.294620694 | protein_coding | 6  | 168396921 | 168445769 | KIF25    |
| ENSG00000125347 | 9.405104778 | 9.681313358 | protein_coding | 5  | 131817301 | 131826490 | IRF1     |
| ENSG00000125351 | 7.715131365 | 8.044860491 | protein_coding | X  | 118967985 | 118986961 | UPF3B    |
| ENSG00000125352 | 7.281453427 | 7.900240894 | protein_coding | X  | 119004497 | 119005791 | RNF113A  |
| ENSG00000125354 | 9.985245743 | 9.862835714 | protein_coding | X  | 118749687 | 118827333 | 6-sep    |
| ENSG00000125355 | 3.652182994 | 3.081239798 | protein_coding | X  | 119392505 | 119445411 | FAM70A   |
| ENSG00000125356 | 9.021506037 | 9.906963845 | protein_coding | X  | 119005450 | 119010625 | NDUFA1   |
| ENSG00000125375 | 5.741167503 | 5.759604001 | protein_coding | 14 | 50779044  | 50802276  | ATP5S    |
| ENSG00000125378 | 5.649112675 | 6.023720496 | protein_coding | 14 | 54416454  | 54425479  | BMP4     |
| ENSG00000125384 | 0.499066092 | 0.390640832 | protein_coding | 14 | 52781023  | 52795324  | PTGER2   |
| ENSG00000125386 | 8.276809264 | 8.375860541 | protein_coding | 4  | 2626988   | 2734292   | FAM193A  |
| ENSG00000125388 | 5.346128795 | 5.886365696 | protein_coding | 4  | 2965335   | 3042474   | GRK4     |
| ENSG00000125398 | 10.38231481 | 9.730728943 | protein_coding | 17 | 70117161  | 70122561  | SOX9     |
| ENSG00000125409 | 2.238690726 | 2.652276565 | protein_coding | 17 | 15207128  | 15244958  | TEKT3    |

|                 |             |             |                |    |           |           |          |
|-----------------|-------------|-------------|----------------|----|-----------|-----------|----------|
| ENSG00000125414 | 0           | 0.390640832 | protein_coding | 17 | 10368772  | 10453274  | MYH2     |
| ENSG00000125430 | 7.058051099 | 6.827478203 | protein_coding | 17 | 14204400  | 14252721  | HS3ST3B1 |
| ENSG00000125434 | 6.897280837 | 6.762847836 | protein_coding | 17 | 8191082   | 8198661   | SLC25A35 |
| ENSG00000125445 | 9.245304163 | 9.55579319  | protein_coding | 17 | 73257749  | 73262456  | MRP57    |
| ENSG00000125447 | 9.142495894 | 9.344309385 | protein_coding | 17 | 73232695  | 73258444  | GGA3     |
| ENSG00000125449 | 6.585843317 | 6.223059835 | protein_coding | 17 | 73106082  | 73126360  | ARMC7    |
| ENSG00000125450 | 9.419108071 | 9.52932336  | protein_coding | 17 | 73201597  | 73231854  | NUP85    |
| ENSG00000125454 | 8.215945216 | 8.377210474 | protein_coding | 17 | 73269062  | 73285530  | SLC25A19 |
| ENSG00000125457 | 6.634666104 | 6.686500471 | protein_coding | 17 | 73262313  | 73267303  | MIF4GD   |
| ENSG00000125458 | 7.974178365 | 8.418443943 | protein_coding | 17 | 73126324  | 73127877  | NT5C     |
| ENSG00000125459 | 7.250461488 | 7.922602475 | protein_coding | 1  | 155579979 | 155718153 | MSTO1    |
| ENSG00000125462 | 7.776245808 | 7.977035488 | protein_coding | 1  | 156374044 | 156400493 | C1orf61  |
| ENSG00000125482 | 7.481543613 | 7.201227369 | protein_coding | 9  | 135251008 | 135282213 | TTF1     |
| ENSG00000125484 | 10.35252484 | 10.05811545 | protein_coding | 9  | 135545422 | 135570342 | GTF3C4   |
| ENSG00000125485 | 8.327805238 | 8.351343215 | protein_coding | 9  | 135468384 | 135545788 | DDX31    |
| ENSG00000125492 | 0.499066092 | 0.390640832 | protein_coding | 9  | 135457572 | 135465653 | BARHL1   |
| ENSG00000125503 | 9.902936511 | 10.4325864  | protein_coding | 19 | 55602283  | 55628927  | PPP1R12C |
| ENSG00000125505 | 11.71738313 | 12.05013478 | protein_coding | 19 | 54677107  | 54693733  | MBOAT7   |
| ENSG00000125508 | 2.57521082  | 1.667587519 | protein_coding | 20 | 62172163  | 62178857  | SRMS     |
| ENSG00000125510 | 4.6658819   | 3.453019579 | protein_coding | 20 | 62711526  | 62731996  | OPRL1    |
| ENSG00000125520 | 10.01724335 | 9.51467792  | protein_coding | 20 | 62369623  | 62374858  | SLC2A4RG |
| ENSG00000125531 | 3.502389126 | 1.802319292 | protein_coding | 20 | 62184373  | 62188061  | C2orf195 |
| ENSG00000125534 | 10.82342579 | 10.31846698 | protein_coding | 20 | 62152077  | 62153559  | PPDPF    |
| ENSG00000125538 | 5.286269488 | 3.64455972  | protein_coding | 2  | 113587328 | 113594480 | IL1B     |
| ENSG00000125551 | 0.869158192 | 0.950786998 | protein_coding | 2  | 88045917  | 88058312  | PLGLB2   |
| ENSG00000125571 | 0.499066092 | 0.950786998 | protein_coding | 2  | 113670548 | 113676459 | IL37     |
| ENSG00000125611 | 7.581430769 | 7.485338407 | protein_coding | 2  | 113341817 | 113346852 | CHCHD5   |
| ENSG00000125618 | 7.182306324 | 7.182818183 | protein_coding | 2  | 113973574 | 114036527 | PAX8     |
| ENSG00000125629 | 8.077121473 | 8.122575449 | protein_coding | 2  | 118846028 | 118868573 | INSIG2   |
| ENSG00000125630 | 9.784207642 | 9.489933546 | protein_coding | 2  | 113299492 | 113334673 | POLR1B   |
| ENSG00000125631 | 1.407729925 | 0.697730409 | pseudogene     | 2  | 118617003 | 118692518 | HTR5BP   |
| ENSG00000125633 | 9.170704638 | 9.233151934 | protein_coding | 2  | 118673054 | 118771709 | CCDC93   |
| ENSG00000125637 | 8.009315251 | 6.963107483 | protein_coding | 2  | 113914902 | 113960814 | PSD4     |
| ENSG00000125648 | 11.46406982 | 10.89612464 | protein_coding | 19 | 6436093   | 6459781   | SLC25A23 |
| ENSG00000125650 | 4.322773689 | 3.748356452 | protein_coding | 19 | 6375159   | 6377338   | PSPN     |
| ENSG00000125651 | 10.67742157 | 10.64697018 | protein_coding | 19 | 6379580   | 6393992   | GTF2F1   |
| ENSG00000125652 | 8.373468605 | 8.848412964 | protein_coding | 19 | 6372444   | 6375261   | ALKBH7   |
| ENSG00000125656 | 10.3009932  | 10.44132471 | protein_coding | 19 | 6361463   | 6368915   | CLPP     |
| ENSG00000125657 | 9.12871464  | 8.591248608 | protein_coding | 19 | 6531010   | 6535939   | TNFSF9   |
| ENSG00000125675 | 0.499066092 | 0           | protein_coding | X  | 122318006 | 122624766 | GRIA3    |
| ENSG00000125676 | 9.911010438 | 9.930142285 | protein_coding | X  | 122734412 | 122866906 | THOC2    |
| ENSG00000125686 | 9.588992469 | 9.379087693 | protein_coding | 17 | 37560538  | 37607521  | MED1     |
| ENSG00000125691 | 11.19194892 | 11.78885999 | protein_coding | 17 | 37004118  | 37010064  | RPL23    |
| ENSG00000125695 | 8.229914881 | 8.774525884 | protein_coding | 17 | 61780196  | 61819330  | STRADA   |
| ENSG00000125703 | 6.676071387 | 6.746227492 | protein_coding | 1  | 63249806  | 63339980  | ATG4C    |
| ENSG00000125726 | 9.228504544 | 9.479915728 | protein_coding | 19 | 6583135   | 6591163   | CD70     |
| ENSG00000125730 | 14.2767362  | 14.582944   | protein_coding | 19 | 6677846   | 6730573   | C3       |
| ENSG00000125731 | 9.533752964 | 8.11126287  | protein_coding | 19 | 6752211   | 6767523   | SH2D3A   |
| ENSG00000125733 | 10.92198671 | 11.08599454 | protein_coding | 19 | 6739691   | 6751537   | TRIP10   |
| ENSG00000125734 | 9.80834902  | 10.22372209 | protein_coding | 19 | 6730066   | 6737614   | GPR108   |
| ENSG00000125735 | 6.283060568 | 6.104183162 | protein_coding | 19 | 6663148   | 6670599   | TNFSF14  |
| ENSG00000125740 | 9.051032802 | 2.420525079 | protein_coding | 19 | 45971253  | 45978414  | FOSB     |
| ENSG00000125741 | 7.943018447 | 7.541804862 | protein_coding | 19 | 46030685  | 46105470  | OPA3     |
| ENSG00000125743 | 9.998712996 | 10.80853254 | protein_coding | 19 | 46190713  | 46195443  | SNRPD2   |
| ENSG00000125744 | 6.212449006 | 5.611474642 | protein_coding | 19 | 45988550  | 46000313  | RTN2     |
| ENSG00000125746 | 7.648344073 | 7.04352744  | protein_coding | 19 | 46112660  | 46148726  | EML2     |
| ENSG00000125753 | 9.173805166 | 8.817919521 | protein_coding | 19 | 46010688  | 46030236  | VASP     |
| ENSG00000125755 | 10.24608033 | 10.04713217 | protein_coding | 19 | 46318693  | 46366548  | SYMPK    |
| ENSG00000125772 | 7.663128351 | 8.032919217 | protein_coding | 20 | 5525081   | 5591672   | GPCPD1   |
| ENSG00000125775 | 3.950976309 | 4.622587519 | protein_coding | 20 | 1290619   | 1309883   | SDCBP2   |
| ENSG00000125779 | 9.021506037 | 9.317136766 | protein_coding | 20 | 3869486   | 3907605   | PANK2    |
| ENSG00000125780 | 1.407729925 | 1.518964905 | protein_coding | 20 | 2276647   | 2321724   | TGM3     |
| ENSG00000125787 | 1.407729925 | 2.334191469 | protein_coding | 20 | 3024268   | 3026393   | GNRH2    |

|                 |             |             |                |    |           |           |          |
|-----------------|-------------|-------------|----------------|----|-----------|-----------|----------|
| ENSG00000125798 | 6.103936836 | 0.697730409 | protein_coding | 20 | 22561643  | 22566093  | FOXA2    |
| ENSG00000125804 | 5.286269488 | 5.496926774 | protein_coding | 20 | 26035291  | 26073683  | FAM182A  |
| ENSG00000125810 | 0           | 0.390640832 | protein_coding | 20 | 23059986  | 23066977  | CD93     |
| ENSG00000125812 | 8.164919416 | 8.177844832 | protein_coding | 20 | 23342787  | 23353700  | GZF1     |
| ENSG00000125814 | 7.850461307 | 8.431497548 | protein_coding | 20 | 23355159  | 23402125  | NAPB     |
| ENSG00000125817 | 11.10230876 | 11.13329882 | protein_coding | 20 | 3764498   | 3767337   | CENPB    |
| ENSG00000125818 | 11.21320105 | 11.16744486 | protein_coding | 20 | 1093906   | 1149022   | PSMF1    |
| ENSG00000125821 | 9.323698603 | 9.445582628 | protein_coding | 20 | 18568537  | 18744561  | DTD1     |
| ENSG00000125826 | 10.8899802  | 11.25210284 | protein_coding | 20 | 388142    | 411610    | RBCK1    |
| ENSG00000125827 | 8.803966282 | 9.708915586 | protein_coding | 20 | 7957995   | 8000476   | TMX4     |
| ENSG00000125834 | 10.1124219  | 9.869085912 | protein_coding | 20 | 2082257   | 2157684   | STK35    |
| ENSG00000125835 | 11.43787282 | 11.96538831 | protein_coding | 20 | 2442280   | 2451499   | SNRPB    |
| ENSG00000125841 | 9.751377591 | 9.890987074 | protein_coding | 20 | 327527    | 335512    | NRSN2    |
| ENSG00000125843 | 8.057112115 | 8.093304774 | protein_coding | 20 | 3801178   | 3805949   | C20orf29 |
| ENSG00000125844 | 12.12164897 | 12.19810991 | protein_coding | 20 | 17594323  | 17662940  | RRBP1    |
| ENSG00000125845 | 8.901951857 | 8.755966294 | protein_coding | 20 | 6748311   | 6760910   | BMP2     |
| ENSG00000125846 | 7.858191159 | 8.349968848 | protein_coding | 20 | 18269121  | 18297640  | ZNF133   |
| ENSG00000125848 | 3.652182994 | 0.697730409 | protein_coding | 20 | 14303634  | 14318262  | FLRT3    |
| ENSG00000125850 | 4.409500985 | 0           | protein_coding | 20 | 17937623  | 18039832  | OVOL2    |
| ENSG00000125863 | 9.749300695 | 10.11059465 | protein_coding | 20 | 10385832  | 10414870  | MKKS     |
| ENSG00000125864 | 4.712111592 | 5.112089758 | protein_coding | 20 | 17474550  | 17549865  | BFSP1    |
| ENSG00000125868 | 11.20816934 | 11.53210637 | protein_coding | 20 | 17550508  | 17588887  | DSTN     |
| ENSG00000125870 | 8.965354743 | 9.434602747 | protein_coding | 20 | 16710606  | 16722421  | SNRPB2   |
| ENSG00000125871 | 8.772951555 | 8.848412964 | protein_coding | 20 | 17949556  | 17971765  | C20orf72 |
| ENSG00000125872 | 1.407729925 | 1.353254395 | protein_coding | 20 | 6021424   | 6034695   | LRRN4    |
| ENSG00000125875 | 9.559268022 | 10.12874091 | protein_coding | 20 | 416124    | 443197    | TBC1D20  |
| ENSG00000125877 | 9.367686069 | 9.786150016 | protein_coding | 20 | 3189514   | 3204516   | ITPA     |
| ENSG00000125885 | 9.429522058 | 9.565299431 | protein_coding | 20 | 5931298   | 5975852   | MCM8     |
| ENSG00000125895 | 3.274897671 | 3.279072565 | protein_coding | 20 | 1161205   | 1166059   | TMEM74B  |
| ENSG00000125898 | 7.773523328 | 7.340609974 | protein_coding | 20 | 814358    | 826922    | FAM110A  |
| ENSG00000125900 | 0.499066092 | 0.390640832 | protein_coding | 20 | 1514897   | 1539489   | SIRPD    |
| ENSG00000125901 | 9.553725034 | 10.03307035 | protein_coding | 20 | 3026591   | 3028900   | MRPS26   |
| ENSG00000125910 | 3.335220907 | 3.081239798 | protein_coding | 19 | 3178736   | 3180329   | S1PR4    |
| ENSG00000125912 | 11.51140672 | 11.37965236 | protein_coding | 19 | 3185875   | 3209572   | NCLN     |
| ENSG00000125931 | 0.499066092 | 0.950786998 | protein_coding | X  | 71521488  | 71527037  | CITED1   |
| ENSG00000125944 | 10.9613953  | 10.76845662 | protein_coding | 1  | 23630264  | 23670829  | HNRNPR   |
| ENSG00000125945 | 6.856698814 | 7.219404604 | protein_coding | 1  | 23685941  | 23695935  | ZNF436   |
| ENSG00000125952 | 9.807683852 | 9.965124308 | protein_coding | 14 | 65472892  | 65569413  | MAX      |
| ENSG00000125962 | 6.032862302 | 4.961837817 | protein_coding | X  | 101854096 | 101969594 | ARMCX5   |
| ENSG00000125965 | 2.35979773  | 2.788380093 | protein_coding | 20 | 34021145  | 34042568  | GDF5     |
| ENSG00000125966 | 9.121239074 | 9.902751889 | protein_coding | 20 | 33814457  | 33864804  | MMP24    |
| ENSG00000125967 | 8.724437638 | 8.480051236 | protein_coding | 20 | 32244893  | 32262269  | NECAB3   |
| ENSG00000125968 | 9.817629308 | 9.087365757 | protein_coding | 20 | 30193086  | 30194318  | ID1      |
| ENSG00000125970 | 11.2591741  | 11.21936033 | protein_coding | 20 | 32581452  | 32696114  | RALY     |
| ENSG00000125971 | 10.08083775 | 10.44583493 | protein_coding | 20 | 33104214  | 33128762  | DYNLRB1  |
| ENSG00000125977 | 10.22730153 | 10.43680034 | protein_coding | 20 | 32676104  | 32700138  | EIF2S2   |
| ENSG00000125991 | 11.00556812 | 11.74103524 | protein_coding | 20 | 34129770  | 34145405  | ERGIC3   |
| ENSG00000125995 | 8.931561329 | 10.01453929 | protein_coding | 20 | 34287194  | 34288906  | ROMO1    |
| ENSG00000125997 | 1.407729925 | 1.16600992  | pseudogene     | 20 | 31935526  | 31942250  | BPIFB9P  |
| ENSG00000125998 | 0.869158192 | 0.390640832 | protein_coding | 20 | 33873534  | 33880204  | FAM83C   |
| ENSG00000126001 | 10.51373727 | 10.96440245 | protein_coding | 20 | 34042985  | 34099804  | CEP250   |
| ENSG00000126003 | 9.0577617   | 9.068270303 | protein_coding | 20 | 30780306  | 30795594  | PLAGL2   |
| ENSG00000126005 | 8.631273684 | 9.457118017 | antisense      | 20 | 33804634  | 33865934  | MT1P3    |
| ENSG00000126010 | 1.16343121  | 1.667587519 | protein_coding | X  | 16141679  | 16171144  | GRPR     |
| ENSG00000126012 | 10.93818348 | 11.22518166 | protein_coding | X  | 53220503  | 53254604  | KDM5C    |
| ENSG00000126016 | 3.989024711 | 3.493416095 | protein_coding | X  | 112017731 | 112084043 | AMOT     |
| ENSG00000126062 | 8.523597116 | 8.709567138 | protein_coding | 3  | 50392180  | 50397041  | TMEM115  |
| ENSG00000126067 | 10.53800235 | 10.49080191 | protein_coding | 1  | 36067185  | 36107445  | PSMB2    |
| ENSG00000126070 | 7.04004079  | 7.373448694 | protein_coding | 1  | 36396319  | 36522063  | EIF2C3   |
| ENSG00000126088 | 9.354083505 | 10.28325773 | protein_coding | 1  | 45477819  | 45481247  | UROD     |
| ENSG00000126091 | 7.04004079  | 7.405556541 | protein_coding | 1  | 44171495  | 44396831  | ST3GAL3  |
| ENSG00000126106 | 5.695874189 | 5.404622322 | protein_coding | 1  | 45100910  | 45140227  | TMEM53   |
| ENSG00000126107 | 9.349520666 | 9.379761309 | protein_coding | 1  | 45468212  | 45477001  | HECTD3   |

|                 |             |             |                  |    |           |           |           |
|-----------------|-------------|-------------|------------------|----|-----------|-----------|-----------|
| ENSG00000126214 | 8.695964893 | 7.977035488 | protein_coding   | 14 | 104028233 | 104167888 | KLC1      |
| ENSG00000126215 | 9.818950204 | 9.053992028 | protein_coding   | 14 | 104163946 | 104181841 | XRCC3     |
| ENSG00000126216 | 8.342575358 | 8.031205224 | protein_coding   | 13 | 113139325 | 113242481 | TUBGCP3   |
| ENSG00000126217 | 5.255381949 | 1.16600992  | protein_coding   | 13 | 113548692 | 113754053 | MCF2L     |
| ENSG00000126218 | 0.869158192 | 1.518964905 | protein_coding   | 13 | 113777128 | 113803843 | F10       |
| ENSG00000126226 | 8.705994399 | 8.46235258  | protein_coding   | 13 | 113831891 | 113863029 | PCID2     |
| ENSG00000126231 | 2.57521082  | 2.334191469 | protein_coding   | 13 | 113812968 | 113826694 | PROZ      |
| ENSG00000126233 | 0           | 0.390640832 | protein_coding   | 8  | 143822362 | 143823829 | SLURP1    |
| ENSG00000126243 | 8.146099194 | 7.801136513 | protein_coding   | 19 | 36428022  | 36436095  | LRFN3     |
| ENSG00000126246 | 4.6658819   | 5.125003832 | protein_coding   | 19 | 36230153  | 36233351  | IGFLR1    |
| ENSG00000126247 | 11.27056274 | 11.2337767  | protein_coding   | 19 | 36630918  | 36641254  | CAPNS1    |
| ENSG00000126249 | 7.31554162  | 6.984522608 | protein_coding   | 19 | 34895303  | 34917070  | PDCD2L    |
| ENSG00000126254 | 9.863155878 | 9.55340681  | protein_coding   | 19 | 36119980  | 36128586  | RBM42     |
| ENSG00000126259 | 2.10647801  | 0.390640832 | protein_coding   | 19 | 36347810  | 36358048  | KIRREL2   |
| ENSG00000126261 | 9.940436455 | 9.908365102 | protein_coding   | 19 | 34919264  | 34960795  | UBA2      |
| ENSG00000126262 | 0.869158192 | 1.16600992  | protein_coding   | 19 | 35940617  | 35942667  | FFAR2     |
| ENSG00000126264 | 1.16343121  | 1.353254395 | protein_coding   | 19 | 36393382  | 36395173  | HCST      |
| ENSG00000126267 | 9.421718623 | 9.680766824 | protein_coding   | 19 | 36139125  | 36149686  | COX6B1    |
| ENSG00000126351 | 8.494133947 | 7.616862529 | protein_coding   | 17 | 38218446  | 38250120  | THRA      |
| ENSG00000126353 | 0.869158192 | 0.390640832 | protein_coding   | 17 | 38710021  | 38721724  | CCR7      |
| ENSG00000126368 | 7.285281023 | 6.762847836 | protein_coding   | 17 | 38249040  | 38256978  | NR1D1     |
| ENSG00000126391 | 9.032934112 | 8.696649474 | protein_coding   | 11 | 65154070  | 65180996  | FRMD8     |
| ENSG00000126432 | 10.57638764 | 10.97402535 | protein_coding   | 11 | 64085560  | 64089283  | PRDX5     |
| ENSG00000126453 | 8.38421606  | 8.457255683 | protein_coding   | 19 | 50168399  | 50177172  | BCL2L12   |
| ENSG00000126456 | 9.147761519 | 8.929781562 | protein_coding   | 19 | 50162829  | 50169132  | IRF3      |
| ENSG00000126457 | 11.64531434 | 11.52785834 | protein_coding   | 19 | 50179043  | 50192286  | PRMT1     |
| ENSG00000126458 | 8.774313977 | 8.919626348 | protein_coding   | 19 | 50138552  | 50143400  | RRAS      |
| ENSG00000126460 | 4.517578978 | 4.202780776 | protein_coding   | 19 | 50084587  | 50094265  | PRRG2     |
| ENSG00000126461 | 10.38410065 | 10.10571686 | protein_coding   | 19 | 50145382  | 50161905  | SCAF1     |
| ENSG00000126464 | 9.532948302 | 9.375039375 | protein_coding   | 19 | 50094912  | 50129695  | PRR12     |
| ENSG00000126467 | 3.554067925 | 3.748356452 | protein_coding   | 19 | 50243018  | 50266543  | TSKS      |
| ENSG00000126500 | 5.417620896 | 5.137803333 | protein_coding   | 11 | 63870660  | 63886645  | FLRT1     |
| ENSG00000126522 | 8.853790788 | 8.386624806 | protein_coding   | 7  | 65540785  | 65558545  | ASL       |
| ENSG00000126524 | 9.577332188 | 9.49491649  | protein_coding   | 7  | 66452664  | 66460635  | SBDS      |
| ENSG00000126550 | 0           | 0.390640832 | protein_coding   | 4  | 70916119  | 70924562  | HTN1      |
| ENSG00000126561 | 7.784382559 | 8.508664347 | protein_coding   | 17 | 40439565  | 40463961  | STAT5A    |
| ENSG00000126562 | 6.956090577 | 7.295628905 | protein_coding   | 17 | 40932649  | 40949061  | WNK4      |
| ENSG00000126581 | 8.331511968 | 8.344458247 | protein_coding   | 17 | 40962150  | 40976310  | BECN1     |
| ENSG00000126583 | 4.026095388 | 3.96493948  | protein_coding   | 19 | 54382444  | 54410906  | PRKCG     |
| ENSG00000126602 | 11.52522921 | 11.57052385 | protein_coding   | 16 | 3708038   | 3767565   | TRAP1     |
| ENSG00000126603 | 8.349904097 | 7.650745242 | protein_coding   | 16 | 4364762   | 4389598   | GLIS2     |
| ENSG00000126653 | 8.541310587 | 8.048254208 | protein_coding   | 17 | 28443799  | 28513493  | NSRP1     |
| ENSG00000126698 | 9.637710578 | 9.858492738 | protein_coding   | 1  | 28527068  | 28559536  | DNAJC8    |
| ENSG00000126705 | 9.564002263 | 9.317839931 | protein_coding   | 1  | 27860546  | 27930942  | AHDC1     |
| ENSG00000126709 | 9.766517491 | 11.44917376 | protein_coding   | 1  | 27992572  | 27998729  | IFI6      |
| ENSG00000126746 | 9.083268927 | 8.906597279 | protein_coding   | 12 | 6775643   | 6798738   | ZNF384    |
| ENSG00000126749 | 6.94645393  | 7.012590419 | processed_transc | 12 | 7079944   | 7095921   | EMG1      |
| ENSG00000126752 | 0           | 0.390640832 | protein_coding   | X  | 48114752  | 48126879  | SSX1      |
| ENSG00000126756 | 8.842144812 | 9.5858785   | protein_coding   | X  | 47511197  | 47518560  | UXT       |
| ENSG00000126759 | 4.409500985 | 4.127774132 | protein_coding   | X  | 47483612  | 47489704  | CFP       |
| ENSG00000126767 | 9.704266019 | 9.782079226 | protein_coding   | X  | 47494920  | 47510003  | ELK1      |
| ENSG00000126768 | 8.682966505 | 8.882083758 | protein_coding   | X  | 48750730  | 48755426  | TIMM17B   |
| ENSG00000126773 | 10.01436362 | 10.78939442 | protein_coding   | 14 | 60558629  | 60635851  | C14orf135 |
| ENSG00000126775 | 8.219950371 | 9.065760854 | protein_coding   | 14 | 55833110  | 55878576  | ATG14     |
| ENSG00000126777 | 11.26887224 | 11.63992791 | protein_coding   | 14 | 56025790  | 56168244  | KTN1      |
| ENSG00000126778 | 7.23866569  | 7.307006333 | protein_coding   | 14 | 61110132  | 61124977  | SIX1      |
| ENSG00000126785 | 0.499066092 | 0           | protein_coding   | 14 | 63670832  | 63759937  | RHOJ      |
| ENSG00000126787 | 9.228504544 | 9.488060496 | protein_coding   | 14 | 55614830  | 55658396  | DLGAP5    |
| ENSG00000126790 | 8.337054268 | 8.877321491 | protein_coding   | 14 | 59927081  | 59951148  | C14orf149 |
| ENSG00000126803 | 8.672775055 | 9.004186147 | protein_coding   | 14 | 65002623  | 65009955  | HSPA2     |
| ENSG00000126804 | 9.004192374 | 9.322752514 | protein_coding   | 14 | 64970430  | 65000408  | ZBTB1     |
| ENSG00000126814 | 8.650690744 | 9.121596633 | protein_coding   | 14 | 61438169  | 61448076  | TRMT5     |
| ENSG00000126821 | 9.119096064 | 9.162099548 | protein_coding   | 14 | 64150932  | 64194757  | SGPP1     |

|                 |             |             |                |    |           |           |          |
|-----------------|-------------|-------------|----------------|----|-----------|-----------|----------|
| ENSG00000126822 | 9.972245312 | 9.764649066 | protein_coding | 14 | 65170820  | 65213610  | PLEKHG3  |
| ENSG00000126838 | 0           | 0.697730409 | protein_coding | 12 | 9301436   | 9360966   | PZP      |
| ENSG00000126856 | 1.799000381 | 1.16600992  | protein_coding | 16 | 90122974  | 90158480  | PRDM7    |
| ENSG00000126858 | 8.245716314 | 7.953699568 | protein_coding | 17 | 30469473  | 30552746  | RHOT1    |
| ENSG00000126860 | 4.734682531 | 6.25865215  | protein_coding | 17 | 29643428  | 29648767  | EVI2A    |
| ENSG00000126861 | 2.671945279 | 2.721932731 | protein_coding | 17 | 29621665  | 29624349  | OMG      |
| ENSG00000126870 | 8.33889698  | 8.601680156 | protein_coding | 7  | 158649269 | 158749438 | WDR60    |
| ENSG00000126878 | 5.255381949 | 1.518964905 | protein_coding | 9  | 133971863 | 133998539 | AIF1L    |
| ENSG00000126882 | 5.563445526 | 5.717592784 | protein_coding | 9  | 134133463 | 134151934 | FAM78A   |
| ENSG00000126883 | 10.13539932 | 9.860907117 | protein_coding | 9  | 134000948 | 134110057 | NUP214   |
| ENSG00000126890 | 0.499066092 | 0           | protein_coding | X  | 153880246 | 153881853 | CTAG2    |
| ENSG00000126895 | 3.211941663 | 2.242360793 | protein_coding | X  | 153167985 | 153172620 | AVPR2    |
| ENSG00000126903 | 9.120167967 | 9.319947372 | protein_coding | X  | 153715645 | 153719016 | SLC10A3  |
| ENSG00000126934 | 12.01245138 | 12.01739401 | protein_coding | 19 | 4090319   | 4124126   | MAP2K2   |
| ENSG00000126945 | 10.07808233 | 10.17138273 | protein_coding | X  | 100663207 | 100669121 | HNRNPH2  |
| ENSG00000126947 | 5.899377978 | 6.771086752 | protein_coding | X  | 100805514 | 100809683 | ARMCX1   |
| ENSG00000126953 | 7.258272112 | 7.871792517 | protein_coding | X  | 100600649 | 100604184 | TIMM8A   |
| ENSG00000127022 | 12.635844   | 12.66803498 | protein_coding | 5  | 179105629 | 179157926 | CANX     |
| ENSG00000127054 | 10.23028291 | 10.22409723 | protein_coding | 1  | 1246965   | 1260071   | CPSF3L   |
| ENSG00000127074 | 0.499066092 | 0           | protein_coding | 1  | 192605275 | 192629390 | RGS13    |
| ENSG00000127080 | 6.664362065 | 6.695185789 | protein_coding | 9  | 95375466  | 95432547  | IPPK     |
| ENSG00000127081 | 6.305850085 | 6.217041467 | protein_coding | 9  | 95607874  | 95640304  | ZNF484   |
| ENSG00000127083 | 1.16343121  | 1.16600992  | protein_coding | 9  | 95176527  | 95186743  | OMD      |
| ENSG00000127084 | 5.175139844 | 2.652276565 | protein_coding | 9  | 95709733  | 95798518  | FGD3     |
| ENSG00000127124 | 7.906207969 | 7.679480043 | protein_coding | 1  | 41972036  | 42501596  | HIVEP3   |
| ENSG00000127125 | 7.556308086 | 7.568048738 | protein_coding | 1  | 42921788  | 42948411  | PPCS     |
| ENSG00000127129 | 3.603959378 | 6.554308016 | protein_coding | 1  | 41944446  | 41950344  | EDN2     |
| ENSG00000127152 | 0.499066092 | 0           | protein_coding | 14 | 99635624  | 99737861  | BCL11B   |
| ENSG00000127184 | 9.76309053  | 10.11747676 | protein_coding | 5  | 85913721  | 85916779  | COX7C    |
| ENSG00000127191 | 9.417365074 | 9.474249985 | protein_coding | 9  | 139776364 | 139821059 | TRAF2    |
| ENSG00000127220 | 7.311793575 | 7.365308824 | protein_coding | 19 | 17402941  | 17414282  | ABHD8    |
| ENSG00000127241 | 1.16343121  | 0.390640832 | protein_coding | 3  | 186935942 | 187009810 | MASP1    |
| ENSG00000127249 | 0           | 0.697730409 | protein_coding | 3  | 193119866 | 193310900 | ATP13A4  |
| ENSG00000127311 | 5.869093502 | 5.995870484 | protein_coding | 12 | 66696325  | 66737423  | HELB     |
| ENSG00000127314 | 7.399163791 | 7.519971735 | protein_coding | 12 | 69004619  | 69054372  | RAP1B    |
| ENSG00000127325 | 1.16343121  | 1.353254395 | protein_coding | 12 | 70037140  | 70093256  | BEST3    |
| ENSG00000127328 | 6.912209543 | 7.659647832 | protein_coding | 12 | 70132461  | 70216984  | RAB3IP   |
| ENSG00000127329 | 3.78787645  | 4.385599336 | protein_coding | 12 | 70910630  | 71031220  | PTPRB    |
| ENSG00000127334 | 8.458982065 | 8.301022059 | protein_coding | 12 | 68042118  | 68059186  | DYRK2    |
| ENSG00000127337 | 7.621344476 | 8.056703738 | protein_coding | 12 | 69753483  | 69784576  | YEATS4   |
| ENSG00000127362 | 0.499066092 | 1.667587519 | protein_coding | 7  | 141463897 | 141464997 | TAS2R3   |
| ENSG00000127364 | 1.616589159 | 1.518964905 | protein_coding | 7  | 141478242 | 141479235 | TAS2R4   |
| ENSG00000127366 | 2.671945279 | 3.748356452 | protein_coding | 7  | 141490017 | 141491166 | TAS2R5   |
| ENSG00000127377 | 1.16343121  | 0.390640832 | protein_coding | 7  | 151125921 | 151137899 | CRYGN    |
| ENSG00000127399 | 9.881603942 | 8.591248608 | protein_coding | 7  | 150019728 | 150035239 | LRR61    |
| ENSG00000127412 | 0.869158192 | 0.390640832 | protein_coding | 7  | 142605267 | 142630905 | TRPV5    |
| ENSG00000127415 | 5.958104008 | 6.577981353 | protein_coding | 4  | 980785    | 998316    | IDUA     |
| ENSG00000127418 | 9.533752964 | 8.865827498 | protein_coding | 4  | 1003724   | 1020685   | FGFRL1   |
| ENSG00000127419 | 7.726437377 | 8.029489191 | protein_coding | 4  | 926175    | 952444    | TMEM175  |
| ENSG00000127423 | 6.646617938 | 6.725179132 | protein_coding | 1  | 26158414  | 26185903  | C1orf135 |
| ENSG00000127445 | 9.670274772 | 9.979416425 | protein_coding | 19 | 9945999   | 9960365   | PIN1     |
| ENSG00000127452 | 8.678607554 | 8.397309351 | protein_coding | 19 | 9920947   | 9929731   | FBXL12   |
| ENSG00000127463 | 10.11349877 | 10.46881022 | protein_coding | 1  | 19542158  | 19578046  | KIAA0090 |
| ENSG00000127481 | 11.61806776 | 11.72680998 | protein_coding | 1  | 19401000  | 19536770  | UBR4     |
| ENSG00000127483 | 10.25684158 | 10.42542696 | protein_coding | 1  | 21069154  | 21113816  | HP1BP3   |
| ENSG00000127507 | 7.123655438 | 6.408769788 | protein_coding | 19 | 14843205  | 14889353  | EMR2     |
| ENSG00000127511 | 10.05192082 | 10.13792826 | protein_coding | 19 | 16940218  | 16991164  | SIN3B    |
| ENSG00000127526 | 10.38900032 | 10.32127499 | protein_coding | 19 | 16661661  | 16683193  | SLC35E1  |
| ENSG00000127527 | 9.264821181 | 9.493672366 | protein_coding | 19 | 16466220  | 16582781  | EPS15L1  |
| ENSG00000127528 | 7.943018447 | 7.176629214 | protein_coding | 19 | 16435651  | 16438337  | KLF2     |
| ENSG00000127533 | 5.879259127 | 3.411459265 | protein_coding | 19 | 16999826  | 17002830  | F2RL3    |
| ENSG00000127540 | 9.818950204 | 10.62980078 | protein_coding | 19 | 1597154   | 1605483   | UQCR11   |
| ENSG00000127554 | 7.434062125 | 7.764467022 | protein_coding | 16 | 2034208   | 2037750   | GFER     |

|                 |             |             |                |    |           |           |           |
|-----------------|-------------|-------------|----------------|----|-----------|-----------|-----------|
| ENSG00000127561 | 8.009315251 | 7.782918269 | protein_coding | 16 | 2039661   | 2044276   | SYNGR3    |
| ENSG00000127564 | 9.832747078 | 9.898527599 | protein_coding | 16 | 3018103   | 3030505   | PKMYT1    |
| ENSG00000127578 | 2.57521082  | 2.334191469 | protein_coding | 16 | 680932    | 684116    | WFIKKN1   |
| ENSG00000127580 | 8.54291017  | 8.590084877 | protein_coding | 16 | 734622    | 740444    | WDR2A     |
| ENSG00000127585 | 7.700873103 | 7.480322213 | protein_coding | 16 | 742500    | 755829    | WDLX16    |
| ENSG00000127586 | 10.1242235  | 10.77410398 | protein_coding | 16 | 838046    | 850737    | CHTF18    |
| ENSG00000127588 | 2.10647801  | 2.144285137 | protein_coding | 16 | 848041    | 850733    | GNG13     |
| ENSG00000127589 | 5.806547963 | 5.855704078 | pseudogene     | 8  | 30209389  | 30211034  | TUBBP1    |
| ENSG00000127603 | 11.09087261 | 11.24472634 | protein_coding | 1  | 39546988  | 39952849  | MACF1     |
| ENSG00000127616 | 13.04220317 | 12.99755058 | protein_coding | 19 | 11071598  | 11172958  | SMARCA4   |
| ENSG00000127663 | 9.442434712 | 9.699773395 | protein_coding | 19 | 4969124   | 5153606   | KDM4B     |
| ENSG00000127666 | 9.432113851 | 9.242070261 | protein_coding | 19 | 4815939   | 4831737   | TICAM1    |
| ENSG00000127688 | 6.449220685 | 6.619638408 | protein_coding | 16 | 81348557  | 81413940  | GAN       |
| ENSG00000127720 | 4.322773689 | 4.7279204   | protein_coding | 12 | 82752276  | 82873015  | C12orf26  |
| ENSG00000127774 | 5.360713447 | 6.392840898 | protein_coding | 17 | 3572090   | 3572962   | TMEM93    |
| ENSG00000127804 | 9.482995289 | 10.07941968 | protein_coding | 17 | 2319352   | 2415200   | METT16    |
| ENSG00000127824 | 10.52955592 | 10.44551324 | protein_coding | 2  | 220114433 | 220142892 | TUBA4A    |
| ENSG00000127831 | 0           | 0.697730409 | protein_coding | 2  | 219283815 | 219318018 | VIL1      |
| ENSG00000127837 | 10.43796299 | 10.32931774 | protein_coding | 2  | 219128850 | 219134980 | AAMP      |
| ENSG00000127838 | 9.86187486  | 9.393168008 | protein_coding | 2  | 219135115 | 219211516 | PNKD      |
| ENSG00000127863 | 4.261916566 | 4.489113623 | protein_coding | 13 | 24144509  | 24250232  | TNFRSF19  |
| ENSG00000127870 | 8.681514984 | 8.755966294 | protein_coding | 13 | 26706253  | 26796791  | RNF6      |
| ENSG00000127884 | 10.36614204 | 10.71794276 | protein_coding | 10 | 135175984 | 135187193 | ECHS1     |
| ENSG00000127914 | 8.725846631 | 8.747640323 | protein_coding | 7  | 91570181  | 91739987  | AKAP9     |
| ENSG00000127920 | 7.847875458 | 8.439273392 | protein_coding | 7  | 93551011  | 93555831  | GNG11     |
| ENSG00000127922 | 9.740266097 | 9.665379195 | protein_coding | 7  | 96110938  | 96339203  | SHFM1     |
| ENSG00000127928 | 1.16343121  | 0.950786998 | protein_coding | 7  | 93220885  | 93540577  | GNGT1     |
| ENSG00000127946 | 10.00452934 | 9.537194665 | protein_coding | 7  | 75162621  | 75368280  | HIP1      |
| ENSG00000127947 | 10.51414505 | 10.2319528  | protein_coding | 7  | 77166592  | 77269388  | PTPN12    |
| ENSG00000127948 | 9.96986896  | 9.522019224 | protein_coding | 7  | 75528518  | 75616173  | POR       |
| ENSG00000127952 | 8.890689734 | 8.806942451 | protein_coding | 7  | 75625656  | 75677322  | STYXL1    |
| ENSG00000127954 | 2.847891871 | 3.493416095 | protein_coding | 7  | 87900207  | 87936206  | STEAP4    |
| ENSG00000127955 | 7.770795701 | 7.284161038 | protein_coding | 7  | 79763271  | 79848718  | GNAI1     |
| ENSG00000127957 | 4.842525946 | 4.777836593 | pseudogene     | 7  | 75132254  | 75157478  | PMS2P3    |
| ENSG00000127980 | 7.671926738 | 7.490337219 | protein_coding | 7  | 92116334  | 92157845  | PEX1      |
| ENSG00000127989 | 6.917151646 | 6.79148052  | protein_coding | 7  | 91500243  | 91510034  | MTERF     |
| ENSG00000127990 | 8.431612753 | 7.858322159 | protein_coding | 7  | 94214542  | 94285521  | SGCE      |
| ENSG00000127993 | 7.140657543 | 7.408200217 | protein_coding | 7  | 92158087  | 92167319  | RBM48     |
| ENSG00000127995 | 6.965663283 | 7.029859489 | protein_coding | 7  | 94138531  | 94186331  | CASD1     |
| ENSG00000128000 | 5.107569429 | 5.383282767 | protein_coding | 19 | 40534167  | 40562116  | ZNF780B   |
| ENSG00000128011 | 4.689181911 | 4.250702764 | protein_coding | 19 | 39797208  | 39805976  | LRFN1     |
| ENSG00000128016 | 7.757079669 | 5.018301917 | protein_coding | 19 | 39897487  | 39900045  | ZFP36     |
| ENSG00000128039 | 7.22677265  | 7.507697912 | protein_coding | 4  | 56212276  | 56239263  | SRD5A3    |
| ENSG00000128040 | 0           | 0.390640832 | protein_coding | 4  | 57676026  | 57687908  | SPINK2    |
| ENSG00000128045 | 2.238690726 | 1.925536307 | protein_coding | 4  | 53728457  | 53733000  | RASL11B   |
| ENSG00000128050 | 11.35014693 | 11.24620466 | protein_coding | 4  | 57301907  | 57327534  | PAICS     |
| ENSG00000128052 | 1.16343121  | 1.667587519 | protein_coding | 4  | 55944644  | 55991756  | KDR       |
| ENSG00000128059 | 8.738466022 | 8.540340653 | protein_coding | 4  | 57259528  | 57301781  | PPAT      |
| ENSG00000128159 | 9.538571537 | 9.497401522 | protein_coding | 22 | 50656118  | 50683421  | TUBGCP6   |
| ENSG00000128165 | 8.251597515 | 8.288162655 | protein_coding | 22 | 50919985  | 50924869  | ADM2      |
| ENSG00000128185 | 7.437505974 | 8.041458772 | protein_coding | 22 | 20301799  | 20307603  | DGCR6L    |
| ENSG00000128191 | 8.764749894 | 8.9643232   | protein_coding | 22 | 20067755  | 20099400  | DGCR8     |
| ENSG00000128203 | 5.60078458  | 6.051043053 | protein_coding | 22 | 26825239  | 26840981  | ASPHD2    |
| ENSG00000128218 | 3.502389126 | 2.579085888 | protein_coding | 22 | 24094930  | 24096655  | VPREB3    |
| ENSG00000128228 | 8.602416377 | 8.697730375 | protein_coding | 22 | 21996550  | 21998587  | SDF2L1    |
| ENSG00000128242 | 2.928422289 | 3.32456471  | protein_coding | 22 | 30950622  | 30970574  | GAL3ST1   |
| ENSG00000128245 | 11.78060919 | 11.85829373 | protein_coding | 22 | 32340447  | 32353590  | YWHAH     |
| ENSG00000128253 | 0           | 1.518964905 | protein_coding | 22 | 32586422  | 32600718  | RFPL2     |
| ENSG00000128254 | 1.616589159 | 2.242360793 | protein_coding | 22 | 32329507  | 32341504  | C22orf24  |
| ENSG00000128262 | 1.799000381 | 1.16600992  | pseudogene     | 22 | 24647796  | 24661493  | POM121L9P |
| ENSG00000128266 | 5.660945913 | 6.510691757 | protein_coding | 22 | 23412540  | 23467224  | GNAZ      |
| ENSG00000128268 | 1.16343121  | 2.334191469 | protein_coding | 22 | 39853349  | 39888199  | MGAT3     |
| ENSG00000128271 | 4.409500985 | 3.87606762  | protein_coding | 22 | 24813847  | 24838328  | ADORA2A   |

|                 |             |             |                |    |           |           |          |
|-----------------|-------------|-------------|----------------|----|-----------|-----------|----------|
| ENSG00000128272 | 11.44366427 | 11.6521071  | protein_coding | 22 | 39915700  | 39918691  | ATF4     |
| ENSG00000128274 | 8.565120083 | 7.8660349   | protein_coding | 22 | 43088127  | 43117304  | A4GALT   |
| ENSG00000128276 | 1.799000381 | 2.334191469 | protein_coding | 22 | 32750872  | 32757148  | RFPL3    |
| ENSG00000128283 | 11.54292278 | 11.4769838  | protein_coding | 22 | 37956454  | 37965412  | CDC42EP1 |
| ENSG00000128284 | 7.842689815 | 7.225413142 | protein_coding | 22 | 36536372  | 36562225  | APOL3    |
| ENSG00000128285 | 2.762599152 | 2.039052734 | protein_coding | 22 | 41074754  | 41078818  | MCHR1    |
| ENSG00000128294 | 8.565120083 | 9.124010896 | protein_coding | 22 | 26921458  | 26992681  | TPST2    |
| ENSG00000128298 | 3.911897206 | 3.993387124 | protein_coding | 22 | 38480896  | 38506677  | BAIAP2L2 |
| ENSG00000128309 | 9.866353456 | 10.0752671  | protein_coding | 22 | 37415676  | 37425863  | MPST     |
| ENSG00000128310 | 0           | 0.390640832 | protein_coding | 22 | 38219389  | 38221502  | GALR3    |
| ENSG00000128311 | 8.685865174 | 8.887777807 | protein_coding | 22 | 37406900  | 37415681  | TST      |
| ENSG00000128335 | 9.64070152  | 9.774415396 | protein_coding | 22 | 36622256  | 36636000  | APOL2    |
| ENSG00000128340 | 10.28435524 | 9.957022333 | protein_coding | 22 | 37621301  | 37640488  | RAC2     |
| ENSG00000128342 | 11.46005406 | 11.71951137 | protein_coding | 22 | 30636436  | 30642840  | LIF      |
| ENSG00000128346 | 6.94645393  | 6.1803943   | protein_coding | 22 | 38339528  | 38349676  | C22orf23 |
| ENSG00000128383 | 0.499066092 | 0           | protein_coding | 22 | 39348746  | 39359188  | APOBEC3A |
| ENSG00000128394 | 7.792473675 | 7.213370937 | protein_coding | 22 | 39436609  | 39449915  | APOBEC3F |
| ENSG00000128408 | 6.320845526 | 6.495854971 | protein_coding | 22 | 45809572  | 45828376  | RIBC2    |
| ENSG00000128422 | 7.781675404 | 9.226426823 | protein_coding | 17 | 39775689  | 39781094  | KRT17    |
| ENSG00000128438 | 0           | 0.390640832 | pseudogene     | 17 | 16826229  | 16838153  | TBC1D27  |
| ENSG00000128463 | 9.072234198 | 9.129628513 | protein_coding | 15 | 34517200  | 34522357  | TMEM85   |
| ENSG00000128482 | 4.999881834 | 5.506827567 | protein_coding | 17 | 19314507  | 19320589  | RNF112   |
| ENSG00000128487 | 10.13168366 | 10.68371137 | protein_coding | 17 | 19912614  | 20222339  | SPECC1   |
| ENSG00000128510 | 9.820929282 | 10.26039601 | protein_coding | 7  | 129932974 | 129964020 | CPA4     |
| ENSG00000128512 | 8.484177644 | 8.66273344  | protein_coding | 7  | 111366168 | 111846466 | DOCK4    |
| ENSG00000128513 | 8.408986408 | 8.323603978 | protein_coding | 7  | 124462440 | 124570037 | POT1     |
| ENSG00000128524 | 9.077762113 | 9.281534232 | protein_coding | 7  | 128502880 | 128505898 | ATP6V1F  |
| ENSG00000128534 | 8.099033379 | 8.129000175 | protein_coding | 7  | 117824086 | 117832878 | NAA38    |
| ENSG00000128536 | 3.554067925 | 2.039052734 | protein_coding | 7  | 105517242 | 105676877 | CDHR3    |
| ENSG00000128563 | 8.101206377 | 7.964516916 | protein_coding | 7  | 102004319 | 102067123 | PRKRIP1  |
| ENSG00000128564 | 4.642199401 | 4.990346085 | protein_coding | 7  | 100805790 | 100808874 | VGF      |
| ENSG00000128567 | 11.32410363 | 10.6583965  | protein_coding | 7  | 131185021 | 131242976 | PODXL    |
| ENSG00000128573 | 0.499066092 | 0.697730409 | protein_coding | 7  | 113726382 | 114333827 | FOXP2    |
| ENSG00000128578 | 8.941297632 | 8.397309351 | protein_coding | 7  | 129074274 | 129128240 | FAM40B   |
| ENSG00000128581 | 7.928406768 | 7.556178852 | protein_coding | 7  | 100956975 | 100965104 | RABL5    |
| ENSG00000128585 | 9.332973914 | 9.196916881 | protein_coding | 7  | 130794855 | 131181395 | MKLN1    |
| ENSG00000128590 | 7.792473675 | 8.034631177 | protein_coding | 7  | 108210012 | 108215294 | DNAJB9   |
| ENSG00000128591 | 5.613019223 | 4.693656882 | protein_coding | 7  | 128470431 | 128499328 | FLNC     |
| ENSG00000128594 | 2.762599152 | 2.788380093 | protein_coding | 7  | 127667124 | 127672160 | LRRC4    |
| ENSG00000128595 | 12.00013163 | 11.8880726  | protein_coding | 7  | 128379346 | 128411861 | CALU     |
| ENSG00000128596 | 5.485736881 | 3.993387124 | protein_coding | 7  | 128430811 | 128462186 | CCDC136  |
| ENSG00000128604 | 5.485736881 | 1.802319292 | protein_coding | 7  | 128577666 | 128590089 | IRF5     |
| ENSG00000128606 | 1.799000381 | 1.518964905 | protein_coding | 7  | 102553438 | 102585396 | LRRC17   |
| ENSG00000128607 | 8.580777545 | 8.273738696 | protein_coding | 7  | 129710350 | 129773596 | KLHDC10  |
| ENSG00000128609 | 8.528449672 | 8.228085371 | protein_coding | 7  | 123177051 | 123198309 | NDUFA5   |
| ENSG00000128617 | 4.097495944 | 3.813624741 | protein_coding | 7  | 128412545 | 128415844 | OPN1SW   |
| ENSG00000128626 | 8.400188597 | 8.761145731 | protein_coding | 19 | 39421348  | 39423657  | MRPS12   |
| ENSG00000128641 | 11.18658661 | 10.61500149 | protein_coding | 2  | 192109911 | 192290115 | MYO1B    |
| ENSG00000128645 | 0           | 1.16600992  | protein_coding | 2  | 177053307 | 177055688 | HOXD1    |
| ENSG00000128652 | 3.393122761 | 3.935919592 | protein_coding | 2  | 177001340 | 177039577 | HOXD3    |
| ENSG00000128654 | 8.205883411 | 7.985911283 | protein_coding | 2  | 177134123 | 177202753 | MTX2     |
| ENSG00000128655 | 1.799000381 | 2.039052734 | protein_coding | 2  | 178492797 | 178973081 | PDE11A   |
| ENSG00000128656 | 6.343050432 | 4.857374129 | protein_coding | 2  | 175664091 | 175870097 | CHN1     |
| ENSG00000128683 | 6.320845526 | 7.690381265 | protein_coding | 2  | 171669723 | 171717661 | GAD1     |
| ENSG00000128692 | 2.762599152 | 3.133298822 | pseudogene     | 2  | 171608221 | 171609562 | EIF2S2P4 |
| ENSG00000128694 | 7.07583934  | 6.387491945 | protein_coding | 2  | 190611386 | 190627953 | OSGEPL1  |
| ENSG00000128699 | 8.247679379 | 8.344458247 | protein_coding | 2  | 190635049 | 190649097 | ORMDL1   |
| ENSG00000128708 | 9.319971717 | 9.328346488 | protein_coding | 2  | 172778958 | 172848599 | HAT1     |
| ENSG00000128710 | 0.499066092 | 0           | protein_coding | 2  | 176973518 | 176984670 | HOXD10   |
| ENSG00000128713 | 0.499066092 | 0           | protein_coding | 2  | 176968944 | 176974722 | HOXD11   |
| ENSG00000128731 | 9.870818191 | 9.870045082 | protein_coding | 15 | 28356186  | 28567298  | HERC2    |
| ENSG00000128739 | 4.097495944 | 4.202780776 | protein_coding | 15 | 25068794  | 25223870  | SNRPN    |
| ENSG00000128789 | 8.094677541 | 8.234057939 | protein_coding | 18 | 12702425  | 12725739  | PSMG2    |



|                 |             |             |                |    |           |           |          |
|-----------------|-------------|-------------|----------------|----|-----------|-----------|----------|
| ENSG00000128791 | 9.349520666 | 9.140003549 | protein_coding | 18 | 9334765   | 9402418   | TWSG1    |
| ENSG00000128805 | 8.272959095 | 7.881337775 | protein_coding | 10 | 49654077  | 49864310  | ARHGAP22 |
| ENSG00000128829 | 9.487986111 | 9.138412238 | protein_coding | 15 | 40226347  | 40327797  | EIF2AK4  |
| ENSG00000128833 | 5.785082014 | 4.17820932  | protein_coding | 15 | 52484519  | 52587995  | MYO5C    |
| ENSG00000128849 | 7.165790811 | 7.472765069 | protein_coding | 15 | 57668165  | 57842925  | CGNL1    |
| ENSG00000128872 | 5.672682881 | 6.664555628 | protein_coding | 15 | 52043758  | 52108565  | TMOD2    |
| ENSG00000128881 | 7.819120959 | 7.858322159 | protein_coding | 15 | 43030932  | 43213007  | TTBK2    |
| ENSG00000128886 | 1.407729925 | 1.518964905 | protein_coding | 15 | 44064798  | 44069741  | ELL3     |
| ENSG00000128891 | 6.825495146 | 6.45552765  | protein_coding | 15 | 40820882  | 40857256  | C15orf57 |
| ENSG00000128908 | 9.633963159 | 9.351881826 | protein_coding | 15 | 41267889  | 41408552  | INO80    |
| ENSG00000128915 | 8.730065371 | 8.89250574  | protein_coding | 15 | 60711808  | 60771359  | NARG2    |
| ENSG00000128917 | 1.16343121  | 1.518964905 | protein_coding | 15 | 41221538  | 41231237  | DLL4     |
| ENSG00000128918 | 2.35979773  | 2.334191469 | protein_coding | 15 | 58245622  | 58790065  | ALDH1A2  |
| ENSG00000128923 | 7.356139979 | 7.161039629 | protein_coding | 15 | 59063391  | 59154099  | FAM63B   |
| ENSG00000128928 | 9.807683852 | 9.351195062 | protein_coding | 15 | 40697686  | 40728146  | IVD      |
| ENSG00000128944 | 8.742648075 | 8.684705808 | protein_coding | 15 | 40674922  | 40686446  | C15orf23 |
| ENSG00000128951 | 9.294560225 | 9.504213373 | protein_coding | 15 | 48623208  | 48635570  | DUT      |
| ENSG00000128965 | 6.96088487  | 7.652976045 | protein_coding | 15 | 41245160  | 41248710  | CHAC1    |
| ENSG00000128973 | 9.286944125 | 9.224928086 | protein_coding | 15 | 68499330  | 68549549  | CLN6     |
| ENSG00000128989 | 10.26413304 | 10.18532111 | protein_coding | 15 | 52839242  | 52862080  | ARPP19   |
| ENSG00000129003 | 9.029515185 | 9.280091692 | protein_coding | 15 | 62144588  | 62352672  | VPS13C   |
| ENSG00000129007 | 7.053569556 | 6.50081754  | protein_coding | 15 | 68483043  | 68498417  | CALML4   |
| ENSG00000129009 | 3.448790144 | 2.652276565 | protein_coding | 15 | 74466012  | 74469213  | ISLR     |
| ENSG00000129028 | 5.331395195 | 5.683080141 | protein_coding | 15 | 71173681  | 71185124  | THAP10   |
| ENSG00000129038 | 4.230497448 | 4.101879561 | protein_coding | 15 | 74218330  | 74244478  | LOXL1    |
| ENSG00000129048 | 1.616589159 | 0.697730409 | protein_coding | 3  | 132316081 | 132337811 | CCRL1    |
| ENSG00000129055 | 8.245716314 | 8.176294739 | protein_coding | 3  | 134196548 | 134205558 | ANAPC13  |
| ENSG00000129071 | 8.550881589 | 8.524589435 | protein_coding | 3  | 129149787 | 129158878 | MBD4     |
| ENSG00000129083 | 10.85724747 | 11.01188767 | protein_coding | 11 | 14464986  | 14521573  | COPB1    |
| ENSG00000129084 | 8.492479328 | 8.939865791 | protein_coding | 11 | 14515329  | 14665181  | PSMA1    |
| ENSG00000129103 | 11.23216308 | 10.68425679 | protein_coding | 7  | 56131695  | 56148363  | SUMF2    |
| ENSG00000129116 | 11.2999484  | 12.09564019 | protein_coding | 4  | 169418217 | 169849608 | PALLD    |
| ENSG00000129128 | 10.14227455 | 10.32862015 | protein_coding | 4  | 177241115 | 177253396 | SPCS3    |
| ENSG00000129158 | 6.428602508 | 6.948652068 | protein_coding | 11 | 17809595  | 18034709  | SERGEF   |
| ENSG00000129159 | 0.869158192 | 1.16600992  | protein_coding | 11 | 17756359  | 17804602  | KCNC1    |
| ENSG00000129167 | 2.35979773  | 3.411459265 | protein_coding | 11 | 18039111  | 18063973  | TPH1     |
| ENSG00000129170 | 1.616589159 | 2.242360793 | protein_coding | 11 | 19203578  | 19232120  | CSRP3    |
| ENSG00000129173 | 7.222786417 | 7.454976247 | protein_coding | 11 | 19245610  | 19263389  | E2F8     |
| ENSG00000129187 | 9.238410348 | 9.442361917 | protein_coding | 4  | 183811213 | 183839089 | DCTD     |
| ENSG00000129194 | 4.097495944 | 4.15321211  | protein_coding | 17 | 7491498   | 7493488   | SOX15    |
| ENSG00000129195 | 8.550881589 | 9.517741338 | protein_coding | 17 | 6347761   | 6354382   | FAM64A   |
| ENSG00000129197 | 7.855619141 | 8.75700367  | protein_coding | 17 | 5322961   | 5336340   | RPAIN    |
| ENSG00000129204 | 4.026095388 | 4.761389014 | protein_coding | 17 | 5019733   | 5078329   | USP6     |
| ENSG00000129214 | 1.16343121  | 2.501982735 | protein_coding | 17 | 7531287   | 7536701   | SHBG     |
| ENSG00000129219 | 9.56636357  | 9.614204774 | protein_coding | 17 | 4710391   | 4726727   | PLD2     |
| ENSG00000129221 | 0           | 0.697730409 | protein_coding | 17 | 6327057   | 6338519   | AIPL1    |
| ENSG00000129226 | 10.26413304 | 10.88074071 | protein_coding | 17 | 7482922   | 7485431   | CD68     |
| ENSG00000129235 | 8.426422697 | 9.446868902 | protein_coding | 17 | 6544078   | 6547920   | TXNDC17  |
| ENSG00000129244 | 1.16343121  | 1.353254395 | protein_coding | 17 | 7554254   | 7561087   | ATP1B2   |
| ENSG00000129245 | 10.07532163 | 10.62951761 | protein_coding | 17 | 7494548   | 7518215   | FXR2     |
| ENSG00000129250 | 11.78331834 | 12.13157854 | protein_coding | 17 | 4901243   | 4931696   | KIF1C    |
| ENSG00000129255 | 9.536164262 | 10.54765864 | protein_coding | 17 | 7486974   | 7496107   | MPDU1    |
| ENSG00000129270 | 7.049074049 | 0.950786998 | protein_coding | 17 | 34092876  | 34122640  | MMP28    |
| ENSG00000129277 | 0.499066092 | 0           | protein_coding | 17 | 34431220  | 34433014  | CCL4     |
| ENSG00000129282 | 6.171673665 | 5.974624386 | protein_coding | 17 | 34958001  | 34965397  | MRM1     |
| ENSG00000129292 | 7.222786417 | 7.527286218 | protein_coding | 8  | 133787618 | 133861052 | PHF20L1  |
| ENSG00000129295 | 1.407729925 | 0.390640832 | protein_coding | 8  | 133584320 | 133687838 | LRRC6    |
| ENSG00000129315 | 8.883132512 | 8.868709593 | protein_coding | 12 | 49082247  | 49110681  | CCNT1    |
| ENSG00000129317 | 7.578314254 | 7.737391576 | protein_coding | 12 | 44122410  | 44152620  | PUS7L    |
| ENSG00000129347 | 10.37963191 | 10.58844036 | protein_coding | 19 | 10663761  | 10676713  | KRI1     |
| ENSG00000129351 | 13.15645415 | 13.1238483  | protein_coding | 19 | 10764937  | 10803093  | ILF3     |
| ENSG00000129353 | 10.80054076 | 10.34250829 | protein_coding | 19 | 10713121  | 10755235  | SLC44A2  |
| ENSG00000129354 | 7.084651883 | 1.518964905 | protein_coding | 19 | 10683348  | 10697992  | AP1M2    |

|                 |             |             |                  |    |           |           |           |
|-----------------|-------------|-------------|------------------|----|-----------|-----------|-----------|
| ENSG00000129355 | 6.290697143 | 6.490875274 | protein_coding   | 19 | 10677139  | 10679655  | CDKN2D    |
| ENSG00000129422 | 8.981959173 | 9.350507971 | protein_coding   | 8  | 17501304  | 17658426  | MTUS1     |
| ENSG00000129437 | 3.393122761 | 3.081239798 | protein_coding   | 19 | 51580574  | 51587502  | KLK14     |
| ENSG00000129451 | 5.512107582 | 0.950786998 | protein_coding   | 19 | 51516001  | 51523431  | KLK10     |
| ENSG00000129455 | 4.131913373 |             | 0 protein_coding | 19 | 51499264  | 51504958  | KLK8      |
| ENSG00000129460 | 7.865879816 | 8.46616347  | protein_coding   | 14 | 23938897  | 23979071  | NGDN      |
| ENSG00000129465 | 0.869158192 | 0.950786998 | protein_coding   | 14 | 24805227  | 24809251  | RIPK3     |
| ENSG00000129467 | 1.16343121  | 1.353254395 | protein_coding   | 14 | 24787555  | 24804299  | ADCY4     |
| ENSG00000129472 | 7.593829938 | 7.485338407 | protein_coding   | 14 | 21927179  | 21945132  | RAB2B     |
| ENSG00000129473 | 8.649206367 | 9.190020311 | protein_coding   | 14 | 23767999  | 23780968  | BCL2L2    |
| ENSG00000129474 | 11.10555965 | 11.30731878 | protein_coding   | 14 | 23440383  | 23451851  | AJUBA     |
| ENSG00000129480 | 7.136425764 | 7.225413142 | protein_coding   | 14 | 31915242  | 31926716  | C14orf126 |
| ENSG00000129484 | 8.950968668 | 9.336002957 | protein_coding   | 14 | 20811741  | 20826064  | PARP2     |
| ENSG00000129493 | 7.842689815 | 8.234057939 | protein_coding   | 14 | 31760994  | 31889788  | HEATR5A   |
| ENSG00000129514 | 2.10647801  | 1.353254395 | protein_coding   | 14 | 38059189  | 38069245  | FOXA1     |
| ENSG00000129515 | 9.830784156 | 10.08768916 | protein_coding   | 14 | 35030300  | 35099389  | SNX6      |
| ENSG00000129518 | 7.680671792 | 8.329194658 | protein_coding   | 14 | 34985135  | 35008916  | EAPP      |
| ENSG00000129521 | 8.872994239 | 10.53319908 | protein_coding   | 14 | 34393437  | 34931980  | EGLN3     |
| ENSG00000129534 | 8.398422578 | 8.976843446 | protein_coding   | 14 | 45672393  | 45722743  | MIS18BP1  |
| ENSG00000129535 | 2.10647801  | 3.411459265 | protein_coding   | 14 | 24549316  | 24584223  | NRL       |
| ENSG00000129538 | 5.375152132 | 0.950786998 | protein_coding   | 14 | 21269387  | 21271437  | RNASE1    |
| ENSG00000129559 | 8.303476525 | 8.942603846 | protein_coding   | 14 | 24686058  | 24701660  | NEDD8     |
| ENSG00000129562 | 10.04910955 | 10.48830548 | protein_coding   | 14 | 23033805  | 23058175  | DAD1      |
| ENSG00000129566 | 8.944931872 | 9.379087693 | protein_coding   | 14 | 20833826  | 20881588  | TEP1      |
| ENSG00000129595 | 1.407729925 | 1.353254395 | protein_coding   | 5  | 111478138 | 111755013 | EPB41L4A  |
| ENSG00000129596 | 0.499066092 | 0.390640832 | protein_coding   | 5  | 115140430 | 115152651 | CDO1      |
| ENSG00000129625 | 9.448421292 | 9.188483253 | protein_coding   | 5  | 112212084 | 112258236 | REEP5     |
| ENSG00000129636 | 8.429884808 | 9.147933883 | protein_coding   | 16 | 47188298  | 47498060  | ITFG1     |
| ENSG00000129646 | 4.883502971 | 5.383282767 | protein_coding   | 17 | 74270130  | 74303761  | QRICH2    |
| ENSG00000129654 | 7.169937448 | 0.697730409 | protein_coding   | 17 | 74132425  | 74137380  | FOXJ1     |
| ENSG00000129657 | 10.1782276  | 9.817812307 | protein_coding   | 17 | 75084831  | 75213183  | SEC14L1   |
| ENSG00000129667 | 10.09071393 | 9.742822827 | protein_coding   | 17 | 74466976  | 74497508  | RHBDF2    |
| ENSG00000129673 | 4.464551814 | 3.081239798 | protein_coding   | 17 | 74449433  | 74466198  | AANAT     |
| ENSG00000129675 | 2.928422289 | 3.279072565 | protein_coding   | X  | 135747706 | 135864247 | ARHGEF6   |
| ENSG00000129680 | 9.107252267 | 9.242070261 | protein_coding   | X  | 135295381 | 135338641 | MAP7D3    |
| ENSG00000129682 | 4.292665995 | 3.64455972  | protein_coding   | X  | 137713735 | 138304939 | FGF13     |
| ENSG00000129691 | 8.257454839 | 8.652735634 | protein_coding   | 8  | 37962760  | 38001594  | ASH2L     |
| ENSG00000129696 | 6.407685389 | 6.485878328 | protein_coding   | 8  | 33330904  | 33371119  | TTI2      |
| ENSG00000129749 | 3.554067925 | 3.845183986 | protein_coding   | 11 | 3686817   | 3692614   | CHRNA10   |
| ENSG00000129757 | 7.0218028   | 6.25865215  | protein_coding   | 11 | 2904443   | 2907111   | CDKN1C    |
| ENSG00000129810 | 6.393570237 | 6.544728831 | protein_coding   | 3  | 20202085  | 20227784  | SGOL1     |
| ENSG00000129910 | 3.393122761 | 1.802319292 | protein_coding   | 16 | 89238175  | 89261900  | CDH15     |
| ENSG00000129911 | 9.752069226 | 9.489933546 | protein_coding   | 19 | 1852399   | 1863564   | KLF16     |
| ENSG00000129925 | 9.933136027 | 9.582956544 | protein_coding   | 16 | 420773    | 437113    | TMEM8A    |
| ENSG00000129932 | 8.389559911 | 8.449576416 | protein_coding   | 19 | 3490820   | 3500938   | DOHH      |
| ENSG00000129933 | 10.31697412 | 10.49733458 | protein_coding   | 19 | 19431614  | 19469564  | MAU2      |
| ENSG00000129946 | 4.381167248 | 4.917990497 | protein_coding   | 19 | 416587    | 460996    | SHC2      |
| ENSG00000129951 | 4.062237333 | 3.183544561 | protein_coding   | 19 | 812518    | 821967    |           |
| ENSG00000129968 | 7.883662252 | 8.279525596 | protein_coding   | 19 | 1876809   | 1885500   | FAM108A1  |
| ENSG00000129988 | 1.16343121  | 2.971122874 | protein_coding   | 20 | 36974759  | 37005665  | LBP       |
| ENSG00000129990 | 6.059927234 | 6.204928885 | protein_coding   | 19 | 55684464  | 55691720  | SYT5      |
| ENSG00000129991 | 6.687686437 | 6.660126317 | protein_coding   | 19 | 55663138  | 55669100  | TNNI3     |
| ENSG00000129993 | 1.16343121  | 0.950786998 | protein_coding   | 16 | 88941266  | 89043612  | CBFA2T3   |
| ENSG00000130005 | 6.35766608  | 7.204272857 | protein_coding   | 19 | 1397089   | 1401552   | GAMT      |
| ENSG00000130021 | 8.105542576 | 8.032919217 | protein_coding   | X  | 6966961   | 7066231   | HDHD1     |
| ENSG00000130023 | 7.2307479   | 7.113233895 | protein_coding   | 6  | 170151721 | 170181680 | C6orf70   |
| ENSG00000130024 | 8.02999382  | 8.486319932 | protein_coding   | 6  | 170104001 | 170124151 | PHF10     |
| ENSG00000130032 | 0.499066092 | 0.950786998 | protein_coding   | X  | 150863596 | 150874396 | PRRG3     |
| ENSG00000130038 | 2.57521082  | 1.925536307 | protein_coding   | 12 | 3715799   | 3873985   | EFCAB4B   |
| ENSG00000130045 | 1.960915222 | 2.039052734 | protein_coding   | 9  | 91150016  | 91199189  | NXNL2     |
| ENSG00000130052 | 1.616589159 | 4.406904905 | protein_coding   | X  | 67867508  | 67945684  | STARD8    |
| ENSG00000130055 | 1.16343121  | 0.697730409 | protein_coding   | X  | 69642881  | 69653240  | GDPD2     |
| ENSG00000130066 | 9.550548025 | 8.870627795 | protein_coding   | X  | 23801290  | 23804343  | SAT1      |

|                 |             |             |                |   |    |           |           |          |
|-----------------|-------------|-------------|----------------|---|----|-----------|-----------|----------|
| ENSG00000130119 | 9.369490093 | 9.340854184 | protein_coding | X |    | 54556644  | 54587504  | GNL3L    |
| ENSG00000130147 | 10.33969843 | 9.944783414 | protein_coding |   | 2  | 235860617 | 235964358 | SH3BP4   |
| ENSG00000130150 | 7.913645586 | 8.013952351 | protein_coding | X |    | 14891563  | 14940449  | MOSPD2   |
| ENSG00000130158 | 10.23869682 | 9.648708264 | protein_coding |   | 19 | 11309973  | 11373157  | DOCK6    |
| ENSG00000130159 | 10.72187726 | 10.54615918 | protein_coding |   | 19 | 11616745  | 11639987  | ECSIT    |
| ENSG00000130164 | 12.88200393 | 11.57744029 | protein_coding |   | 19 | 11200038  | 11244492  | LDLR     |
| ENSG00000130165 | 10.15801652 | 10.17254941 | protein_coding |   | 19 | 11663858  | 11670051  | ELOF1    |
| ENSG00000130173 | 1.407729925 | 2.039052734 | protein_coding |   | 19 | 11348126  | 11352618  | C19orf80 |
| ENSG00000130175 | 12.48227259 | 12.39487596 | protein_coding |   | 19 | 11546269  | 11561783  | PRKCSH   |
| ENSG00000130176 | 1.616589159 | 4.250702764 | protein_coding |   | 19 | 11649579  | 11661138  | CNN1     |
| ENSG00000130177 | 8.867898261 | 8.948972504 | protein_coding |   | 13 | 115000362 | 115038198 | CDC16    |
| ENSG00000130182 | 0.869158192 | 0.390640832 | protein_coding |   | 16 | 3138895   | 3142861   | ZSCAN10  |
| ENSG00000130193 | 7.700873103 | 8.205465413 | protein_coding |   | 8  | 143808621 | 143818345 | C8orf55  |
| ENSG00000130201 | 0.869158192 | 0.390640832 | protein_coding |   | 19 | 45715879  | 45737469  | EXOC3L2  |
| ENSG00000130202 | 9.636212778 | 9.673093524 | protein_coding |   | 19 | 45349393  | 45392485  | PVRL2    |
| ENSG00000130203 | 4.593635215 | 3.748356452 | protein_coding |   | 19 | 45408956  | 45412650  | APOE     |
| ENSG00000130204 | 9.990530519 | 9.995327612 | protein_coding |   | 19 | 45394477  | 45406935  | TOMM40   |
| ENSG00000130208 | 5.158541613 | 5.175534283 | protein_coding |   | 19 | 45417921  | 45422606  | APOC1    |
| ENSG00000130222 | 2.57521082  | 1.667587519 | protein_coding |   | 9  | 92219928  | 92221470  | GADD45G  |
| ENSG00000130224 | 0           | 0.697730409 | protein_coding | X |    | 114345185 | 114468635 | LRCH2    |
| ENSG00000130226 | 0.499066092 | 0           | protein_coding |   | 7  | 153584182 | 154685995 | DPP6     |
| ENSG00000130227 | 10.25342625 | 10.12271748 | protein_coding |   | 8  | 21777180  | 21864096  | XPO7     |
| ENSG00000130244 | 6.328285199 | 6.338437404 | protein_coding |   | 19 | 38893775  | 38899728  | FAM98C   |
| ENSG00000130254 | 9.31342641  | 9.381780274 | protein_coding |   | 19 | 5587011   | 5622938   | SAFB2    |
| ENSG00000130255 | 11.91761312 | 12.6905383  | protein_coding |   | 19 | 5690272   | 5691674   | RPL36    |
| ENSG00000130270 | 8.193715877 | 8.122575449 | protein_coding |   | 19 | 1782074   | 1812275   | ATP8B3   |
| ENSG00000130287 | 2.35979773  | 2.579085888 | protein_coding |   | 19 | 19322782  | 19363061  | NCAN     |
| ENSG00000130294 | 0.499066092 | 0.390640832 | protein_coding |   | 2  | 241653181 | 241759725 | KIF1A    |
| ENSG00000130299 | 9.338510612 | 8.913126522 | protein_coding |   | 19 | 17445809  | 17453539  | GTPBP3   |
| ENSG00000130300 | 2.57521082  | 2.579085888 | protein_coding |   | 19 | 17462264  | 17488148  | PLVAP    |
| ENSG00000130303 | 11.11983076 | 12.20078083 | protein_coding |   | 19 | 17502082  | 17516457  | BST2     |
| ENSG00000130304 | 7.296703257 | 6.628734426 | protein_coding |   | 19 | 17579578  | 17616977  | SLC27A1  |
| ENSG00000130305 | 8.872994239 | 8.435390709 | protein_coding |   | 7  | 72716514  | 72722864  | NSUN5    |
| ENSG00000130307 | 0.869158192 | 0.697730409 | protein_coding |   | 19 | 17360838  | 17375573  | USHBP1   |
| ENSG00000130309 | 13.07601665 | 12.7937829  | protein_coding |   | 19 | 17666460  | 17693965  | GLT25D1  |
| ENSG00000130311 | 9.480493389 | 9.701929717 | protein_coding |   | 19 | 17420337  | 17434094  | DDA1     |
| ENSG00000130312 | 9.215524471 | 9.830679389 | protein_coding |   | 19 | 17416477  | 17417652  | MRPL34   |
| ENSG00000130313 | 10.32907648 | 10.45481329 | protein_coding |   | 19 | 17622432  | 17632095  | PGLS     |
| ENSG00000130332 | 9.4441477   | 9.940224002 | protein_coding |   | 19 | 2321522   | 2328614   | LSM7     |
| ENSG00000130338 | 8.611591722 | 8.366375472 | protein_coding |   | 6  | 158733692 | 158932860 | TULP4    |
| ENSG00000130340 | 9.106170722 | 8.948064416 | protein_coding |   | 6  | 158244281 | 158366109 | SNX9     |
| ENSG00000130347 | 7.071412799 | 6.733635362 | protein_coding |   | 6  | 107018903 | 107077373 | RTN4IP1  |
| ENSG00000130348 | 7.491518048 | 7.307006333 | protein_coding |   | 6  | 107077453 | 107116292 | QRSL1    |
| ENSG00000130349 | 6.086493765 | 6.758710666 | protein_coding |   | 6  | 107349407 | 107372546 | C6orf203 |
| ENSG00000130363 | 6.664362065 | 6.59664425  | protein_coding |   | 6  | 159397312 | 159421219 | RSPH3    |
| ENSG00000130377 | 3.502389126 | 3.493416095 | protein_coding |   | 19 | 6135710   | 6193112   | ACSBG2   |
| ENSG00000130382 | 11.80897089 | 11.64245619 | protein_coding |   | 19 | 6210393   | 6279959   | MLLT1    |
| ENSG00000130383 | 0.869158192 | 0.390640832 | protein_coding |   | 19 | 5866182   | 5903798   | FUT5     |
| ENSG00000130396 | 10.46605656 | 10.4017445  | protein_coding |   | 6  | 168227602 | 168372703 | MLLT4    |
| ENSG00000130402 | 12.60056532 | 12.45595985 | protein_coding |   | 19 | 39138310  | 39222223  | ACTN4    |
| ENSG00000130413 | 1.616589159 | 0.950786998 | protein_coding |   | 11 | 8413418   | 8615836   | STK33    |
| ENSG00000130414 | 9.399818301 | 9.303711094 | protein_coding |   | 2  | 240831867 | 240964819 | NDUFA10  |
| ENSG00000130427 | 1.407729925 | 0.950786998 | protein_coding |   | 7  | 100318423 | 100321323 | EPO      |
| ENSG00000130429 | 10.52955592 | 9.681859685 | protein_coding |   | 7  | 98971872  | 98992424  | ARPC1B   |
| ENSG00000130433 | 4.261916566 | 4.075511708 | protein_coding |   | 19 | 54495542  | 54515923  | CACNG6   |
| ENSG00000130449 | 8.164919416 | 7.825075067 | protein_coding |   | 5  | 60628100  | 60841997  | ZSWIM6   |
| ENSG00000130475 | 9.239397198 | 8.441856054 | protein_coding |   | 19 | 17858527  | 17899377  | FCHO1    |
| ENSG00000130477 | 6.421663777 | 6.465715653 | protein_coding |   | 19 | 17712137  | 17799401  | UNC13A   |
| ENSG00000130479 | 10.18131202 | 10.00496543 | protein_coding |   | 19 | 17830291  | 17845322  | MAP1S    |
| ENSG00000130487 | 9.058880138 | 7.699043321 | protein_coding |   | 22 | 50986462  | 50989451  | KLHDC7B  |
| ENSG00000130489 | 8.653654925 | 8.908465794 | protein_coding |   | 22 | 50961997  | 50964868  | SCO2     |
| ENSG00000130508 | 9.029515185 | 0.950786998 | protein_coding |   | 2  | 1635659   | 1748624   | PXDN     |
| ENSG00000130511 | 9.968679314 | 9.987835859 | protein_coding |   | 19 | 18530221  | 18545371  | SSBP4    |

|                 |             |             |                  |    |           |           |          |
|-----------------|-------------|-------------|------------------|----|-----------|-----------|----------|
| ENSG00000130513 | 8.655134734 | 9.209096633 | protein_coding   | 19 | 18496968  | 18499986  | GDF15    |
| ENSG00000130517 | 8.417730894 | 8.975061478 | protein_coding   | 19 | 18451408  | 18480763  | PGPEP1   |
| ENSG00000130518 | 4.75690578  | 5.187895122 | protein_coding   | 19 | 18367909  | 18385319  | KIAA1683 |
| ENSG00000130520 | 11.09278494 | 11.29075987 | protein_coding   | 19 | 18417720  | 18434001  | LSM4     |
| ENSG00000130522 | 11.08841017 | 11.06750809 | protein_coding   | 19 | 18390563  | 18392432  | JUND     |
| ENSG00000130528 | 0.869158192 | 0.697730409 | protein_coding   | 19 | 49654458  | 49658681  | HRC      |
| ENSG00000130529 | 8.267164507 | 7.452416987 | protein_coding   | 19 | 49661052  | 49715091  | TRPM4    |
| ENSG00000130544 | 7.55947245  | 7.495318771 | protein_coding   | 19 | 7069471   | 7087979   | ZNF557   |
| ENSG00000130545 | 4.543379137 | 1.518964905 | protein_coding   | 19 | 6464260   | 6467225   | CRB3     |
| ENSG00000130558 | 9.073341477 | 8.940779054 | protein_coding   | 9  | 137967268 | 138013025 | OLFM1    |
| ENSG00000130559 | 10.09617162 | 9.751176567 | protein_coding   | 9  | 138700333 | 138799074 | CAMSAP1  |
| ENSG00000130560 | 9.245304163 | 8.868709593 | protein_coding   | 9  | 138824815 | 138853226 | UBAC1    |
| ENSG00000130561 | 0.499066092 | 0.697730409 | protein_coding   | 2  | 234216309 | 234255701 | SAG      |
| ENSG00000130584 | 6.917151646 | 6.615068802 | protein_coding   | 20 | 62375019  | 62462597  | ZBTB46   |
| ENSG00000130589 | 10.91119017 | 11.13229982 | protein_coding   | 20 | 62189439  | 62205592  |          |
| ENSG00000130590 | 5.948480845 | 6.3217081   | protein_coding   | 20 | 62605466  | 62611361  | SAMD10   |
| ENSG00000130592 | 5.563445526 | 5.085909553 | protein_coding   | 11 | 1874200   | 1913497   | LSP1     |
| ENSG00000130595 | 2.762599152 | 0.390640832 | protein_coding   | 11 | 1940792   | 1959936   | TNNT3    |
| ENSG00000130598 | 3.448790144 | 1.518964905 | protein_coding   | 11 | 1860219   | 1862910   | TNNI2    |
| ENSG00000130600 | 7.35977471  | 5.9163892   | processed_transc | 11 | 2016406   | 2022700   | H19      |
| ENSG00000130612 | 0.499066092 | 0.390640832 | protein_coding   | 19 | 41396731  | 41406413  | CYP2G1P  |
| ENSG00000130635 | 12.49709786 | 12.5303468  | protein_coding   | 9  | 137533620 | 137736686 | COL5A1   |
| ENSG00000130638 | 10.30052049 | 10.24679846 | protein_coding   | 22 | 46067678  | 46241187  | ATXN10   |
| ENSG00000130640 | 10.48406996 | 10.83529938 | protein_coding   | 10 | 135093135 | 135125841 | TUBGCP2  |
| ENSG00000130643 | 1.16343121  | 1.518964905 | protein_coding   | 10 | 135138927 | 135150475 | CALY     |
| ENSG00000130649 | 6.877132514 | 7.801136513 | protein_coding   | 10 | 135333910 | 135374724 | CYP2E1   |
| ENSG00000130653 | 5.458875168 | 5.893930351 | protein_coding   | 9  | 140354404 | 140444986 | PNPLA7   |
| ENSG00000130669 | 8.858936753 | 8.001751392 | protein_coding   | 19 | 39616420  | 39670046  | PAK4     |
| ENSG00000130675 | 4.097495944 | 4.342020395 | protein_coding   | 7  | 156786745 | 156803370 | MNX1     |
| ENSG00000130684 | 5.741167503 | 6.210997888 | protein_coding   | 20 | 25654851  | 25677477  | ZNF337   |
| ENSG00000130695 | 8.972494341 | 8.979512278 | protein_coding   | 1  | 26560691  | 26605299  | CEP85    |
| ENSG00000130699 | 8.847332411 | 8.428896259 | protein_coding   | 20 | 60528525  | 60640866  | TAF4     |
| ENSG00000130701 | 4.131913373 | 0           | protein_coding   | 20 | 60985293  | 61002589  | C2orf151 |
| ENSG00000130702 | 11.55882167 | 10.35043385 | protein_coding   | 20 | 60883011  | 60942368  | LAMA5    |
| ENSG00000130703 | 9.11480047  | 8.613182984 | protein_coding   | 20 | 60813580  | 60871268  | OSBPL2   |
| ENSG00000130706 | 10.27956608 | 10.23045979 | protein_coding   | 20 | 60877149  | 60883918  | ADRM1    |
| ENSG00000130707 | 12.2161591  | 12.12997791 | protein_coding   | 9  | 133320094 | 133376661 | ASS1     |
| ENSG00000130711 | 2.471521042 | 2.501982735 | protein_coding   | 9  | 133539981 | 133558368 | PRDM12   |
| ENSG00000130713 | 9.754142144 | 9.706232715 | protein_coding   | 9  | 133569108 | 133580248 | EXOSC2   |
| ENSG00000130714 | 7.824391858 | 8.094946597 | protein_coding   | 9  | 134378289 | 134399193 | POMT1    |
| ENSG00000130717 | 8.02999382  | 8.282410365 | protein_coding   | 9  | 134399188 | 134406655 | UCK1     |
| ENSG00000130720 | 6.965663283 | 6.142791909 | protein_coding   | 9  | 133777825 | 133814673 | FIBCD1   |
| ENSG00000130723 | 11.41272309 | 10.80075684 | protein_coding   | 9  | 134269480 | 134375584 | PRRC2B   |
| ENSG00000130724 | 10.07421587 | 10.22597149 | protein_coding   | 19 | 59062934  | 59066486  | CHMP2A   |
| ENSG00000130725 | 10.40448041 | 10.45704918 | protein_coding   | 19 | 59067080  | 59070343  | UBE2M    |
| ENSG00000130726 | 13.03205925 | 12.88266396 | protein_coding   | 19 | 59055836  | 59062082  | TRIM28   |
| ENSG00000130731 | 9.120167967 | 9.753257466 | protein_coding   | 16 | 684429    | 686358    | C16orf13 |
| ENSG00000130733 | 10.22431399 | 10.28649432 | protein_coding   | 19 | 11033446  | 11039357  | YIPF2    |
| ENSG00000130734 | 8.400188597 | 7.994732806 | protein_coding   | 19 | 10654593  | 10664093  | ATG4D    |
| ENSG00000130741 | 11.56000706 | 11.43157717 | protein_coding   | X  | 24072833  | 24096088  | EIF2S3   |
| ENSG00000130748 | 6.489593565 | 7.083771121 | protein_coding   | 19 | 47549168  | 47551882  | TMEM160  |
| ENSG00000130749 | 10.08633286 | 9.727557272 | protein_coding   | 19 | 47567449  | 47617009  | ZC3H4    |
| ENSG00000130751 | 2.238690726 | 2.579085888 | protein_coding   | 19 | 47524143  | 47549016  | NPAS1    |
| ENSG00000130758 | 6.984620223 | 6.896886088 | protein_coding   | 19 | 40697651  | 40721481  | MAP3K10  |
| ENSG00000130762 | 8.770222845 | 8.26792849  | protein_coding   | 1  | 3370990   | 3397677   | ARHGEF16 |
| ENSG00000130764 | 9.336667406 | 9.241329169 | protein_coding   | 1  | 3696784   | 3713068   | LRRC47   |
| ENSG00000130766 | 8.269098624 | 8.117738058 | protein_coding   | 1  | 28586038  | 28609002  | SESN2    |
| ENSG00000130768 | 5.613019223 | 4.489113623 | protein_coding   | 1  | 28261504  | 28285668  | SMPDL3B  |
| ENSG00000130770 | 8.602416377 | 8.869669013 | protein_coding   | 1  | 28562620  | 28573417  | ATPIF1   |
| ENSG00000130772 | 6.567100227 | 7.138927266 | protein_coding   | 1  | 28655513  | 28662476  | MED18    |
| ENSG00000130775 | 6.400645076 | 6.963107483 | protein_coding   | 1  | 28199055  | 28213196  | C1orf38  |
| ENSG00000130779 | 10.08633286 | 9.937938881 | protein_coding   | 12 | 122755979 | 122907179 | CLIP1    |
| ENSG00000130783 | 2.762599152 | 2.420525079 | protein_coding   | 12 | 123258874 | 123312075 | CCDC62   |

|                 |             |             |                |   |    |           |           |          |
|-----------------|-------------|-------------|----------------|---|----|-----------|-----------|----------|
| ENSG00000130787 | 9.860592703 | 9.381780274 | protein_coding |   | 12 | 123319000 | 123347507 | HIP1R    |
| ENSG00000130803 | 10.28674387 | 10.2541644  | protein_coding |   | 19 | 9251056   | 9274090   | ZNF317   |
| ENSG00000130810 | 7.464764762 | 7.495318771 | protein_coding |   | 19 | 10216965  | 10225414  | PPAN     |
| ENSG00000130811 | 11.51263169 | 11.72628042 | protein_coding |   | 19 | 10225690  | 10230599  | EIF3G    |
| ENSG00000130812 | 3.393122761 | 4.021284656 | protein_coding |   | 19 | 10203013  | 10213425  | ANGPTL6  |
| ENSG00000130813 | 9.05999771  | 9.640299997 | protein_coding |   | 19 | 10196806  | 10203927  | C19orf66 |
| ENSG00000130816 | 12.50614595 | 12.65835159 | protein_coding |   | 19 | 10244023  | 10305755  | DNMT1    |
| ENSG00000130818 | 7.990682129 | 7.909600377 | protein_coding |   | 19 | 9638683   | 9649303   | ZNF426   |
| ENSG00000130821 | 7.642387679 | 7.883239271 | protein_coding | X |    | 152953554 | 152962048 | SLC6A8   |
| ENSG00000130822 | 2.238690726 | 2.242360793 | protein_coding | X |    | 152935185 | 152954465 | PNCK     |
| ENSG00000130826 | 11.18300063 | 11.26127074 | protein_coding | X |    | 153991031 | 154005964 | DKC1     |
| ENSG00000130827 | 9.813659349 | 9.428104741 | protein_coding | X |    | 153686621 | 153701989 | PLXNA3   |
| ENSG00000130829 | 8.107705799 | 7.462626902 | protein_coding | X |    | 152907946 | 152916781 | DUSP9    |
| ENSG00000130830 | 8.771587845 | 8.579568843 | protein_coding | X |    | 154006959 | 154049282 | MPP1     |
| ENSG00000130844 | 8.947349623 | 9.20225818  | protein_coding |   | 19 | 54024235  | 54083523  | ZNF331   |
| ENSG00000130856 | 7.071412799 | 7.23139676  | protein_coding |   | 18 | 74536116  | 74682680  | ZNF236   |
| ENSG00000130876 | 0.499066092 | 0.950786998 | protein_coding |   | 19 | 33699570  | 33716756  | SLC7A10  |
| ENSG00000130881 | 9.012297947 | 9.509147322 | protein_coding |   | 19 | 33685166  | 33699765  | LRP3     |
| ENSG00000130921 | 7.748787017 | 7.444711851 | protein_coding |   | 12 | 123717463 | 123742506 | C12orf65 |
| ENSG00000130935 | 9.524067267 | 9.756373197 | protein_coding |   | 17 | 65714061  | 65740318  | NOL11    |
| ENSG00000130939 | 9.752069226 | 9.675838676 | protein_coding |   | 1  | 10092890  | 10241297  | UBE4B    |
| ENSG00000130940 | 8.169068555 | 8.309531754 | protein_coding |   | 1  | 10696661  | 10856707  | CASZ1    |
| ENSG00000130943 | 1.16343121  | 1.518964905 | protein_coding |   | 22 | 46651560  | 46659219  | PKDREJ   |
| ENSG00000130948 | 1.407729925 | 2.144285137 | protein_coding |   | 9  | 98997588  | 99064434  | HSD17B3  |
| ENSG00000130950 | 0           | 0.390640832 | protein_coding |   | 9  | 97077605  | 97090926  | FAM22F   |
| ENSG00000130956 | 7.642387679 | 7.389591938 | protein_coding |   | 9  | 99212483  | 99253618  | HABP4    |
| ENSG00000130957 | 1.16343121  | 1.925536307 | protein_coding |   | 9  | 97321002  | 97356075  | FBP2     |
| ENSG00000130958 | 7.514527001 | 6.831423059 | protein_coding |   | 9  | 99082988  | 99145992  | SLC35D2  |
| ENSG00000130962 | 6.771940731 | 6.930376707 | protein_coding | X |    | 37208528  | 37316548  | PRRG1    |
| ENSG00000130985 | 12.78640906 | 12.8300936  | protein_coding | X |    | 47050260  | 47074527  | UBA1     |
| ENSG00000130988 | 4.292665995 | 4.319727133 | protein_coding | X |    | 46937775  | 46952712  | RGN      |
| ENSG00000130997 | 3.78787645  | 4.489113623 | protein_coding |   | 4  | 2073645   | 2243848   | POLN     |
| ENSG00000131013 | 7.660183591 | 7.926295939 | protein_coding |   | 6  | 149825869 | 149867174 | PPIL4    |
| ENSG00000131015 | 5.869093502 | 6.037446454 | protein_coding |   | 6  | 150263136 | 150270371 | ULBP2    |
| ENSG00000131016 | 7.444369108 | 8.17474298  | protein_coding |   | 6  | 151561134 | 151679692 | AKAP12   |
| ENSG00000131018 | 4.026095388 | 4.857374129 | protein_coding |   | 6  | 152442819 | 152958936 | SYNE1    |
| ENSG00000131019 | 6.023726639 | 5.259915406 | protein_coding |   | 6  | 150383341 | 150390257 | ULBP3    |
| ENSG00000131023 | 8.550881589 | 8.704198827 | protein_coding |   | 6  | 149979289 | 150039392 | LATS1    |
| ENSG00000131037 | 7.190493718 | 6.615068802 | protein_coding |   | 19 | 55583407  | 55599290  | EPS8L1   |
| ENSG00000131042 | 0.499066092 | 0           | protein_coding |   | 19 | 54777675  | 54785039  | LILRB2   |
| ENSG00000131043 | 9.599791022 | 9.737051443 | protein_coding |   | 20 | 34824381  | 34858840  | C20orf4  |
| ENSG00000131044 | 0.869158192 | 2.144285137 | protein_coding |   | 20 | 30458505  | 30532764  | TLL1     |
| ENSG00000131051 | 11.19830674 | 11.91178696 | protein_coding |   | 20 | 34291531  | 34330234  | RBM39    |
| ENSG00000131061 | 7.50471092  | 6.99159092  | protein_coding |   | 20 | 32319463  | 32380075  | ZNF341   |
| ENSG00000131067 | 8.074911866 | 8.46235258  | protein_coding |   | 20 | 33432523  | 33460663  | GGT7     |
| ENSG00000131069 | 10.10702545 | 9.423538659 | protein_coding |   | 20 | 33459949  | 33515769  | ACSS2    |
| ENSG00000131080 | 4.543379137 | 1.16600992  | protein_coding | X |    | 65815479  | 65859108  | EDA2R    |
| ENSG00000131089 | 7.663128351 | 8.104758487 | protein_coding | X |    | 62854847  | 63005426  | ARHGEF9  |
| ENSG00000131094 | 4.618121645 | 4.872768657 | protein_coding |   | 17 | 43037061  | 43045644  | C1QL1    |
| ENSG00000131095 | 3.698846687 | 2.144285137 | protein_coding |   | 17 | 42982993  | 42992914  | GFAP     |
| ENSG00000131096 | 1.16343121  | 0.697730409 | protein_coding |   | 17 | 42030111  | 42081837  | PYY      |
| ENSG00000131097 | 2.35979773  | 1.802319292 | protein_coding |   | 17 | 42925279  | 42927840  | HIGD1B   |
| ENSG00000131100 | 9.712817799 | 9.925536292 | protein_coding |   | 22 | 18074902  | 18111584  | ATP6V1E1 |
| ENSG00000131115 | 7.768062907 | 7.860254213 | protein_coding |   | 19 | 44716691  | 44741420  | ZNF227   |
| ENSG00000131116 | 6.386460534 | 7.210344614 | protein_coding |   | 19 | 44111377  | 44124014  | ZNF428   |
| ENSG00000131126 | 0           | 0.950786998 | protein_coding |   | 19 | 43910657  | 43922763  | TEX101   |
| ENSG00000131127 | 5.827699195 | 5.674321415 | protein_coding |   | 4  | 331603    | 378653    | ZNF141   |
| ENSG00000131142 | 0.499066092 | 0.697730409 | protein_coding |   | 19 | 8117651   | 8127534   | CCL25    |
| ENSG00000131143 | 11.13210359 | 11.39289324 | protein_coding |   | 16 | 85832239  | 85840650  | COX4I1   |
| ENSG00000131148 | 8.844740944 | 8.857146507 | protein_coding |   | 16 | 85812230  | 85833148  | COX4NB   |
| ENSG00000131149 | 10.35206871 | 10.17410353 | protein_coding |   | 16 | 85645015  | 85709810  | KIAA0182 |
| ENSG00000131153 | 8.410739551 | 8.765275934 | protein_coding |   | 16 | 85709804  | 85722605  | GIN52    |
| ENSG00000131165 | 10.71408926 | 10.39442996 | protein_coding |   | 16 | 89710839  | 89724253  | CHMP1A   |

|                 |             |             |                |   |          |           |           |           |
|-----------------|-------------|-------------|----------------|---|----------|-----------|-----------|-----------|
| ENSG00000131171 | 7.993024472 | 8.721307575 | protein_coding | X | 80457442 | 80554046  | SH3BGRL   |           |
| ENSG00000131174 | 9.543374069 | 10.24790575 | protein_coding | X | 77154935 | 77162870  | COX7B     |           |
| ENSG00000131183 | 0           | 0.950786998 | protein_coding |   | 5        | 176806236 | 176825849 | SLC34A1   |
| ENSG00000131187 | 5.472368541 | 4.710890357 | protein_coding |   | 5        | 176829141 | 176836577 | F12       |
| ENSG00000131188 | 6.535310252 | 6.505763096 | protein_coding |   | 5        | 176873446 | 176883283 | PRR7      |
| ENSG00000131196 | 7.186405829 | 7.301328834 | protein_coding |   | 18       | 77155772  | 77289325  | NFATC1    |
| ENSG00000131203 | 2.35979773  | 1.925536307 | protein_coding |   | 8        | 39759794  | 39785963  | IDO1      |
| ENSG00000131236 | 11.5844836  | 11.57258753 | protein_coding |   | 1        | 40505905  | 40538321  | CAP1      |
| ENSG00000131238 | 10.09289948 | 10.28361771 | protein_coding |   | 1        | 40538379  | 40563375  | PPT1      |
| ENSG00000131242 | 6.17992145  | 3.32456471  | protein_coding |   | 17       | 29718642  | 29865236  | RAB11FIP4 |
| ENSG00000131263 | 10.13698882 | 10.14547392 | protein_coding | X |          | 73805052  | 73834452  | RLIM      |
| ENSG00000131269 | 8.875535495 | 8.899098923 | protein_coding | X |          | 74273109  | 74376567  | ABCB7     |
| ENSG00000131323 | 10.32210674 | 9.571798825 | protein_coding |   | 14       | 103243813 | 103377837 | TRAF3     |
| ENSG00000131351 | 8.114176072 | 8.480051236 | protein_coding |   | 19       | 17160573  | 17186343  | HAUS8     |
| ENSG00000131368 | 8.878072281 | 9.290875744 | protein_coding |   | 3        | 15083967  | 15106842  | MRPS25    |
| ENSG00000131370 | 4.734682531 | 4.826083323 | protein_coding |   | 3        | 15296360  | 15382875  | SH3BP5    |
| ENSG00000131373 | 8.079327701 | 8.38394126  | protein_coding |   | 3        | 15602211  | 15643338  | HACL1     |
| ENSG00000131374 | 9.168633912 | 8.660517685 | protein_coding |   | 3        | 17199899  | 18486309  | TBC1D5    |
| ENSG00000131375 | 7.698004462 | 8.367734306 | protein_coding |   | 3        | 15247659  | 15294425  | CAPN7     |
| ENSG00000131378 | 9.826850281 | 7.033288635 | protein_coding |   | 3        | 16357352  | 16555533  | RFTN1     |
| ENSG00000131379 | 0.499066092 | 0           | protein_coding |   | 3        | 14716606  | 14814541  | C3orf20   |
| ENSG00000131381 | 8.541310587 | 8.610889744 | protein_coding |   | 3        | 15111580  | 15140670  | ZFYVE20   |
| ENSG00000131386 | 0.499066092 | 0           | protein_coding |   | 3        | 16216156  | 16273499  | GALNTL2   |
| ENSG00000131389 | 10.40843431 | 9.644790504 | protein_coding |   | 3        | 14444076  | 14530857  | SLC6A6    |
| ENSG00000131398 | 6.96088487  | 7.284161038 | protein_coding |   | 19       | 50815194  | 50836772  | KCNC3     |
| ENSG00000131400 | 2.10647801  | 2.420525079 | protein_coding |   | 19       | 50861735  | 50868931  | NAPSA     |
| ENSG00000131401 | 2.762599152 | 3.32456471  | pseudogene     |   | 19       | 50837053  | 50848024  | NAPSB     |
| ENSG00000131408 | 9.462857538 | 9.574743444 | protein_coding |   | 19       | 50832949  | 50886266  | NR1H2     |
| ENSG00000131409 | 4.883502971 | 4.048652948 | protein_coding |   | 19       | 51020149  | 51071302  | LRRC4B    |
| ENSG00000131435 | 9.278327677 | 10.00671086 | protein_coding |   | 5        | 131593364 | 131609147 | PDLM4     |
| ENSG00000131437 | 7.865879816 | 8.093304774 | protein_coding |   | 5        | 132028368 | 132073330 | KIF3A     |
| ENSG00000131446 | 10.46605656 | 10.59280449 | protein_coding |   | 5        | 180217541 | 180242652 | MGAT1     |
| ENSG00000131459 | 10.16945243 | 10.22297151 | protein_coding |   | 5        | 179727690 | 179780387 | GFPT2     |
| ENSG00000131462 | 9.894817144 | 9.830679389 | protein_coding |   | 17       | 40761358  | 40767254  | TUBG1     |
| ENSG00000131467 | 10.58106613 | 10.28613505 | protein_coding |   | 17       | 40976443  | 40995775  | PSME3     |
| ENSG00000131469 | 11.76972141 | 12.35740611 | protein_coding |   | 17       | 41150446  | 41154956  | RPL27     |
| ENSG00000131470 | 6.236372259 | 6.515603638 | protein_coding |   | 17       | 40724329  | 40729747  | PSMC3IP   |
| ENSG00000131471 | 7.08025234  | 6.771086752 | protein_coding |   | 17       | 41003201  | 41010138  | AOC3      |
| ENSG00000131473 | 11.91421833 | 11.23414924 | protein_coding |   | 17       | 40023161  | 40075272  | ACLY      |
| ENSG00000131475 | 8.53489446  | 9.065760854 | protein_coding |   | 17       | 40925454  | 40931616  | VPS25     |
| ENSG00000131480 | 7.026383958 | 7.122922611 | protein_coding |   | 17       | 40996609  | 41002722  | AOC2      |
| ENSG00000131495 | 7.0218028   | 7.546612122 | protein_coding |   | 5        | 140018325 | 140027370 | NDUFA2    |
| ENSG00000131503 | 4.863159938 | 4.489113623 | protein_coding |   | 5        | 139781399 | 139929163 | ANKHD1    |
| ENSG00000131504 | 11.63184932 | 11.0366594  | protein_coding |   | 5        | 140894583 | 140998622 | DIAPH1    |
| ENSG00000131507 | 9.697818752 | 9.514064455 | protein_coding |   | 5        | 141488070 | 141534008 | NDFIP1    |
| ENSG00000131508 | 9.552931438 | 9.461579211 | protein_coding |   | 5        | 138906016 | 139008018 | UBE2D2    |
| ENSG00000131558 | 9.578892348 | 9.138412238 | protein_coding |   | 7        | 132937829 | 133751342 | EXOC4     |
| ENSG00000131584 | 9.053279257 | 9.098048079 | protein_coding |   | 1        | 1227756   | 1244989   | ACAP3     |
| ENSG00000131591 | 8.373468605 | 8.507432028 | protein_coding |   | 1        | 1017198   | 1051741   | C1orf159  |
| ENSG00000131620 | 1.16343121  | 0.697730409 | protein_coding |   | 11       | 69924408  | 70035634  | ANO1      |
| ENSG00000131626 | 10.13327726 | 10.47921951 | protein_coding |   | 11       | 70116806  | 70230509  | PPFIA1    |
| ENSG00000131634 | 1.960915222 | 2.420525079 | protein_coding |   | 16       | 1578689   | 1605581   | TMEM204   |
| ENSG00000131650 | 6.560798025 | 4.566889334 | protein_coding |   | 16       | 3014160   | 3018381   | KREMEN2   |
| ENSG00000131652 | 9.615078651 | 10.1446815  | protein_coding |   | 16       | 3074032   | 3077756   | THOC6     |
| ENSG00000131653 | 11.06994534 | 10.85117288 | protein_coding |   | 16       | 2205699   | 2228130   | TRAF7     |
| ENSG00000131668 | 0.869158192 | 1.667587519 | protein_coding |   | 9        | 96713628  | 96717654  | BARX1     |
| ENSG00000131669 | 9.388297379 | 9.800811083 | protein_coding |   | 9        | 95883771  | 95896570  | NINJ1     |
| ENSG00000131686 | 0.869158192 | 0.950786998 | protein_coding |   | 1        | 9005922   | 9035151   | CA6       |
| ENSG00000131697 | 8.13977083  | 8.205465413 | protein_coding |   | 1        | 5922871   | 6052533   | NPHP4     |
| ENSG00000131711 | 9.99696351  | 9.867165657 | protein_coding |   | 5        | 71403061  | 71505395  | MAP1B     |
| ENSG00000131724 | 10.39432652 | 10.2460598  | protein_coding | X |          | 117861535 | 117928502 | IL13RA1   |
| ENSG00000131725 | 8.259402007 | 8.591248608 | protein_coding | X |          | 117480036 | 117590949 | WDR44     |
| ENSG00000131730 | 2.762599152 | 2.971122874 | protein_coding |   | 5        | 80529104  | 80562216  | CKMT2     |

|                 |             |             |                |    |           |           |            |
|-----------------|-------------|-------------|----------------|----|-----------|-----------|------------|
| ENSG00000131732 | 7.384964606 | 7.655203404 | protein_coding | 5  | 80597409  | 80609116  | ZCCHC9     |
| ENSG00000131737 | 1.16343121  | 0           | protein_coding | 17 | 39533902  | 39538655  | KRT34      |
| ENSG00000131746 | 8.883132512 | 0           | protein_coding | 17 | 38632080  | 38657854  | TNS4       |
| ENSG00000131747 | 11.26814714 | 11.40485593 | protein_coding | 17 | 38544768  | 38574408  | TOP2A      |
| ENSG00000131748 | 9.0577617   | 9.019827949 | protein_coding | 17 | 37793318  | 37820454  | STARD3     |
| ENSG00000131759 | 8.925442603 | 8.129000175 | protein_coding | 17 | 38465436  | 38513895  | RARA       |
| ENSG00000131773 | 4.409500985 | 3.714580548 | protein_coding | 8  | 136469700 | 136668965 | KHDRBS3    |
| ENSG00000131778 | 9.778108644 | 10.44615655 | protein_coding | 1  | 146714291 | 146767443 | CHD1L      |
| ENSG00000131779 | 8.092494681 | 8.301022059 | protein_coding | 1  | 145516252 | 145523730 | PEX11B     |
| ENSG00000131781 | 4.097495944 | 4.528525526 | protein_coding | 1  | 146646930 | 146714700 | FMO5       |
| ENSG00000131788 | 9.800346696 | 9.522019224 | protein_coding | 1  | 145575233 | 145586546 | PIAS3      |
| ENSG00000131791 | 9.036344956 | 9.309379244 | protein_coding | 1  | 146626685 | 146644129 | PRKAB2     |
| ENSG00000131795 | 9.341271012 | 9.909298518 | protein_coding | 1  | 145507598 | 145511444 | RBM8A      |
| ENSG00000131797 | 6.252103507 | 6.930376707 | pseudogene     | 16 | 31711911  | 31721097  | KIAA0664L3 |
| ENSG00000131828 | 10.2337534  | 10.48705564 | protein_coding | X  | 19362011  | 19379823  | PDHA1      |
| ENSG00000131844 | 10.36207036 | 10.15966365 | protein_coding | 5  | 70883115  | 70954531  | MCCC2      |
| ENSG00000131845 | 7.584540566 | 7.770643695 | protein_coding | 19 | 57862645  | 57871266  | ZNF304     |
| ENSG00000131848 | 6.693459083 | 6.970281236 | protein_coding | 19 | 56732681  | 56826294  | ZSCAN5A    |
| ENSG00000131849 | 5.752272083 | 5.938503778 | protein_coding | 19 | 58944182  | 58951589  | ZNF132     |
| ENSG00000131871 | 7.940593421 | 7.991210667 | protein_coding | 15 | 101811022 | 101817705 |            |
| ENSG00000131873 | 8.927893208 | 9.043827484 | protein_coding | 15 | 101715928 | 101792137 | CHSY1      |
| ENSG00000131876 | 8.061582684 | 8.306700762 | protein_coding | 15 | 101821715 | 101835487 | SNRPA1     |
| ENSG00000131885 | 2.238690726 | 1.518964905 | protein_coding | 17 | 16744057  | 16749197  | KRT17P1    |
| ENSG00000131899 | 10.85048168 | 11.306079   | protein_coding | 17 | 18128901  | 18148189  | LLGL1      |
| ENSG00000131910 | 0.499066092 | 1.16600992  | protein_coding | 1  | 27237980  | 27240457  | NROB2      |
| ENSG00000131914 | 0.499066092 | 1.353254395 | protein_coding | 1  | 26737269  | 26756213  | LIN28A     |
| ENSG00000131931 | 6.610461229 | 6.835357159 | protein_coding | 8  | 42691817  | 42698468  | THAP1      |
| ENSG00000131941 | 7.311793575 | 6.712401119 | protein_coding | 19 | 33469499  | 33555824  | RHPN2      |
| ENSG00000131943 | 7.50471092  | 7.546612122 | protein_coding | 19 | 30190483  | 30206364  | C19orf12   |
| ENSG00000131944 | 4.883502971 | 4.710890357 | protein_coding | 19 | 33463148  | 33467946  | C19orf40   |
| ENSG00000131966 | 9.34494335  | 9.952048633 | protein_coding | 14 | 58666798  | 58701750  | ACTR10     |
| ENSG00000131969 | 3.448790144 | 2.851901313 | protein_coding | 14 | 51338878  | 51371688  | ABHD12B    |
| ENSG00000131979 | 6.290697143 | 6.293387477 | protein_coding | 14 | 55308726  | 55369570  | GCH1       |
| ENSG00000131981 | 9.325558442 | 9.407112231 | protein_coding | 14 | 55590828  | 55612126  | LGALS3     |
| ENSG00000131982 | 0.499066092 | 0.390640832 | pseudogene     | 12 | 20602589  | 20603017  | UBE2L2     |
| ENSG00000132000 | 4.19837882  | 3.813624741 | protein_coding | 19 | 14042000  | 14064204  | PODNL1     |
| ENSG00000132002 | 10.61757819 | 10.72908697 | protein_coding | 19 | 14625582  | 14640049  | DNAJB1     |
| ENSG00000132003 | 9.722731226 | 9.924613326 | protein_coding | 19 | 13906274  | 13943044  | ZSWIM4     |
| ENSG00000132004 | 9.151960225 | 9.20378064  | protein_coding | 19 | 12799121  | 12807457  | FBXW9      |
| ENSG00000132005 | 8.610066544 | 8.379906558 | protein_coding | 19 | 14072343  | 14117134  | RFX1       |
| ENSG00000132010 | 4.026095388 | 4.15321211  | protein_coding | 19 | 12241300  | 12251222  | ZNF20      |
| ENSG00000132016 | 6.522395495 | 7.896480033 | protein_coding | 19 | 13993168  | 14016909  | C19orf57   |
| ENSG00000132017 | 9.167597433 | 9.195387157 | protein_coding | 19 | 14063319  | 14072254  | DCAF15     |
| ENSG00000132024 | 9.931915689 | 10.03606464 | protein_coding | 19 | 14016956  | 14041693  | CC2D1A     |
| ENSG00000132026 | 5.090170488 | 4.319727133 | protein_coding | 19 | 12936293  | 12946242  | RTBDN      |
| ENSG00000132031 | 4.593635215 | 3.993387124 | protein_coding | 2  | 20191872  | 20212455  | MATN3      |
| ENSG00000132109 | 7.746012174 | 8.280968702 | protein_coding | 11 | 4406127   | 4414926   | TRIM21     |
| ENSG00000132122 | 5.375152132 | 5.647721597 | protein_coding | 1  | 48761044  | 48937845  | SPATA6     |
| ENSG00000132128 | 9.527303063 | 9.820295675 | protein_coding | 1  | 46726868  | 46769280  | LRRC41     |
| ENSG00000132130 | 6.17992145  | 2.912743273 | protein_coding | 17 | 35294772  | 35301917  | LHX1       |
| ENSG00000132139 | 0.499066092 | 0.390640832 | protein_coding | 17 | 34071530  | 34079897  | GAS2L2     |
| ENSG00000132141 | 3.335220907 | 4.319727133 | protein_coding | 17 | 33254878  | 33288506  | CCT6B      |
| ENSG00000132142 | 10.84465707 | 10.04628383 | protein_coding | 17 | 35441923  | 35766902  | ACACA      |
| ENSG00000132153 | 10.26752315 | 10.23157969 | protein_coding | 3  | 47844399  | 47891685  | DHX30      |
| ENSG00000132155 | 10.18541435 | 10.02921141 | protein_coding | 3  | 12625100  | 12705725  | RAF1       |
| ENSG00000132170 | 7.748787017 | 6.408769788 | protein_coding | 3  | 12328867  | 12475855  | PPARG      |
| ENSG00000132182 | 10.25147099 | 9.237617989 | protein_coding | 3  | 13357737  | 13461809  | NUP210     |
| ENSG00000132185 | 0.869158192 | 0.697730409 | protein_coding | 1  | 161676762 | 161684142 | FCRLA      |
| ENSG00000132196 | 6.129712275 | 5.42565083  | protein_coding | 1  | 162760492 | 162782607 | HSD17B7    |
| ENSG00000132199 | 8.45218826  | 8.616616024 | protein_coding | 18 | 672546    | 712676    | ENOSF1     |
| ENSG00000132204 | 0           | 0.697730409 | protein_coding | 18 | 1268312   | 1359630   | LINC00470  |
| ENSG00000132205 | 4.593635215 | 4.566889334 | protein_coding | 18 | 2847028   | 2914090   | EMILIN2    |
| ENSG00000132207 | 0.869158192 | 1.16600992  | protein_coding | 16 | 30205208  | 30208882  | SLX1A      |

|                 |             |             |                |    |           |           |           |
|-----------------|-------------|-------------|----------------|----|-----------|-----------|-----------|
| ENSG00000132254 | 9.948303785 | 9.795267513 | protein_coding | 11 | 6496910   | 6502666   | ARFIP2    |
| ENSG00000132256 | 8.698837588 | 8.638170933 | protein_coding | 11 | 5684425   | 5959849   | TRIM5     |
| ENSG00000132259 | 0.499066092 | 2.501982735 | protein_coding | 11 | 6255995   | 6265659   | CNGA4     |
| ENSG00000132274 | 5.431503808 | 7.318294738 | protein_coding | 11 | 5710919   | 5758319   | TRIM22    |
| ENSG00000132275 | 7.845284967 | 8.159132889 | protein_coding | 11 | 6616305   | 6624850   | RRP8      |
| ENSG00000132286 | 7.950269163 | 8.008735998 | protein_coding | 11 | 6502677   | 6530208   | FXC1      |
| ENSG00000132294 | 9.186141067 | 9.284414991 | protein_coding | 8  | 132916335 | 133025889 | EFR3A     |
| ENSG00000132300 | 9.423456371 | 9.735473414 | protein_coding | 2  | 86333305  | 86369280  | PTCD3     |
| ENSG00000132305 | 10.66057525 | 10.90854817 | protein_coding | 2  | 86371055  | 86422893  | IMMT      |
| ENSG00000132313 | 8.641761486 | 9.046375341 | protein_coding | 2  | 86426580  | 86440917  | MRPL35    |
| ENSG00000132323 | 8.158673248 | 8.124184315 | protein_coding | 2  | 239079042 | 239112370 | ILKAP     |
| ENSG00000132326 | 6.699208722 | 4.990346085 | protein_coding | 2  | 239152679 | 239198743 | PER2      |
| ENSG00000132329 | 8.558809206 | 8.283850589 | protein_coding | 2  | 238767536 | 238820756 | RAMP1     |
| ENSG00000132330 | 6.984620223 | 6.624193585 | protein_coding | 2  | 238969530 | 239008054 | SCLY      |
| ENSG00000132334 | 8.777034966 | 8.978623216 | protein_coding | 10 | 129705325 | 129884119 | PTPRE     |
| ENSG00000132341 | 11.35789184 | 11.40054751 | protein_coding | 12 | 131356424 | 131362223 | RAN       |
| ENSG00000132356 | 10.27812622 | 10.3400875  | protein_coding | 5  | 40759481  | 40798476  | PRKAA1    |
| ENSG00000132357 | 7.72925009  | 7.157901395 | protein_coding | 5  | 40841286  | 40860275  | CARD6     |
| ENSG00000132359 | 10.71940382 | 10.87477986 | protein_coding | 17 | 2699732   | 2941034   | RAP1GAP2  |
| ENSG00000132361 | 12.10712564 | 12.35740611 | protein_coding | 17 | 2592680   | 2614927   | KIAA0664  |
| ENSG00000132376 | 8.851210906 | 9.748049581 | protein_coding | 17 | 1397872   | 1420182   | INPP5K    |
| ENSG00000132382 | 11.67077621 | 11.76030407 | protein_coding | 17 | 4442192   | 4458681   | MYBBP1A   |
| ENSG00000132383 | 10.99829927 | 11.47304361 | protein_coding | 17 | 1733266   | 1802848   | RPA1      |
| ENSG00000132386 | 4.800350936 | 4.932754837 | protein_coding | 17 | 1665253   | 1680859   | SERPINF1  |
| ENSG00000132388 | 10.36975169 | 10.39342964 | protein_coding | 17 | 4172512   | 4269969   | UBE2G1    |
| ENSG00000132394 | 8.45218826  | 8.094946597 | protein_coding | 3  | 127872297 | 128127485 | EEFSEC    |
| ENSG00000132405 | 8.203862602 | 8.104758487 | protein_coding | 4  | 6910969   | 7034845   | TBC1D14   |
| ENSG00000132406 | 6.970425921 | 7.00911166  | protein_coding | 4  | 4237269   | 4249950   | TMEM128   |
| ENSG00000132423 | 6.830742851 | 6.919299326 | protein_coding | 6  | 99817276  | 99842080  | COQ3      |
| ENSG00000132424 | 9.186141067 | 9.516516751 | protein_coding | 6  | 99845927  | 99873207  | PNISR     |
| ENSG00000132429 | 0.499066092 | 0           | protein_coding | 6  | 105606155 | 105627870 | POPCD3    |
| ENSG00000132432 | 9.262881318 | 9.601555605 | protein_coding | 7  | 54819943  | 54827667  | SEC61G    |
| ENSG00000132434 | 8.096857104 | 8.385283657 | protein_coding | 7  | 55433141  | 55501435  | LANCL2    |
| ENSG00000132436 | 8.637276046 | 8.860045978 | protein_coding | 7  | 50511831  | 50518088  | FIGNL1    |
| ENSG00000132437 | 0           | 0.697730409 | protein_coding | 7  | 50526134  | 50633154  | DDC       |
| ENSG00000132463 | 10.23721557 | 10.42705723 | protein_coding | 4  | 71681499  | 71705662  | GRSF1     |
| ENSG00000132464 | 0           | 0.390640832 | protein_coding | 4  | 71494461  | 71552533  | ENAM      |
| ENSG00000132465 | 0           | 0.390640832 | protein_coding | 4  | 71521258  | 71547534  | IGJ       |
| ENSG00000132466 | 10.82704081 | 10.81576885 | protein_coding | 4  | 73939093  | 74124515  | ANKRD17   |
| ENSG00000132467 | 8.753741308 | 8.790825214 | protein_coding | 4  | 71554196  | 71556267  | UTP3      |
| ENSG00000132470 | 12.22216178 | 5.80042639  | protein_coding | 17 | 73713474  | 73753898  | ITGB4     |
| ENSG00000132471 | 10.84562947 | 10.68343859 | protein_coding | 17 | 73841780  | 73851501  | WBP2      |
| ENSG00000132475 | 11.38912937 | 11.42326962 | protein_coding | 17 | 73772517  | 73775860  | H3F3B     |
| ENSG00000132478 | 8.162840364 | 8.477536111 | protein_coding | 17 | 73780681  | 73821886  | UNK       |
| ENSG00000132481 | 9.394512382 | 9.565299431 | protein_coding | 17 | 73870247  | 73874656  | TRIM47    |
| ENSG00000132485 | 9.169669647 | 9.405790002 | protein_coding | 1  | 71528974  | 71546980  | ZRANB2    |
| ENSG00000132498 | 0.869158192 | 0           | protein_coding | 9  | 43089972  | 43133544  | ANKRD20A3 |
| ENSG00000132507 | 13.57565834 | 13.82177636 | protein_coding | 17 | 7210318   | 7215782   | EIF5A     |
| ENSG00000132510 | 9.841222348 | 9.652615414 | protein_coding | 17 | 7743222   | 7758106   | KDM6B     |
| ENSG00000132517 | 3.146112541 | 2.144285137 | protein_coding | 17 | 4935895   | 4955304   | GPR172B   |
| ENSG00000132518 | 1.16343121  | 0.697730409 | protein_coding | 17 | 7905988   | 7923658   | GUCY2D    |
| ENSG00000132522 | 9.355904607 | 9.930602076 | protein_coding | 17 | 7214643   | 7222394   | GPS2      |
| ENSG00000132530 | 9.847060811 | 11.24213563 | protein_coding | 17 | 6659156   | 6678962   | XAF1      |
| ENSG00000132535 | 8.513842764 | 8.982176182 | protein_coding | 17 | 7093209   | 7123369   | DLG4      |
| ENSG00000132541 | 6.738827102 | 6.945015469 | protein_coding | 8  | 99114572  | 99129469  | HRSP12    |
| ENSG00000132549 | 7.959880444 | 7.832967122 | protein_coding | 8  | 100025494 | 100889808 | VPS13B    |
| ENSG00000132561 | 5.538004898 | 6.434933235 | protein_coding | 8  | 98881068  | 99048944  | MATN2     |
| ENSG00000132563 | 6.275383355 | 5.317302248 | protein_coding | 5  | 137774706 | 137782658 | REEP2     |
| ENSG00000132570 | 6.283060568 | 6.460630645 | protein_coding | 5  | 134240596 | 134343649 | PCBD2     |
| ENSG00000132581 | 8.286389971 | 8.213044874 | protein_coding | 17 | 26975374  | 26989203  | SDF2      |
| ENSG00000132589 | 10.08193845 | 9.494294562 | protein_coding | 17 | 27206353  | 27224712  | FLOT2     |
| ENSG00000132591 | 9.722731226 | 9.493672366 | protein_coding | 17 | 27182020  | 27188085  | ERAL1     |
| ENSG00000132600 | 8.971306859 | 9.210611898 | protein_coding | 16 | 68344877  | 68392466  | PRMT7     |



|                 |             |             |                |    |           |           |           |
|-----------------|-------------|-------------|----------------|----|-----------|-----------|-----------|
| ENSG00000132603 | 8.690202285 | 8.668257984 | protein_coding | 16 | 69373343  | 69377014  | NIP7      |
| ENSG00000132604 | 8.373468605 | 8.108014344 | protein_coding | 16 | 69389464  | 69442474  | TERF2     |
| ENSG00000132612 | 9.572641559 | 9.608468897 | protein_coding | 16 | 69333562  | 69358949  | VPS4A     |
| ENSG00000132613 | 8.150302734 | 7.784953917 | protein_coding | 16 | 70695108  | 70719954  | MTSS1L    |
| ENSG00000132622 | 5.512107582 | 4.385599336 | protein_coding | 20 | 3713314   | 3733758   | HSPA12B   |
| ENSG00000132623 | 8.025424129 | 7.586839732 | protein_coding | 20 | 10015689  | 10037410  | ANKRD5    |
| ENSG00000132635 | 8.936437694 | 9.397831074 | protein_coding | 20 | 2815960   | 2821836   | FAM113A   |
| ENSG00000132639 | 0.499066092 | 0           | protein_coding | 20 | 10199478  | 10288066  | SNAP25    |
| ENSG00000132640 | 8.472474444 | 9.05483585  | protein_coding | 20 | 11871371  | 11907257  | BTBD3     |
| ENSG00000132646 | 11.18325706 | 11.69725626 | protein_coding | 20 | 5095599   | 5107272   | PCNA      |
| ENSG00000132661 | 8.440221571 | 8.640421249 | protein_coding | 20 | 23331373  | 23335414  | NXT1      |
| ENSG00000132664 | 7.23866569  | 7.758263791 | protein_coding | 20 | 18447771  | 18465287  | POLR3F    |
| ENSG00000132669 | 9.762404159 | 9.348444734 | protein_coding | 20 | 19867165  | 19983101  | RIN2      |
| ENSG00000132670 | 10.19511088 | 10.42412141 | protein_coding | 20 | 2844830   | 3019722   | PTPRA     |
| ENSG00000132676 | 10.77047592 | 10.94609939 | protein_coding | 1  | 155657751 | 155708803 | DAP3      |
| ENSG00000132677 | 3.077135474 | 1.518964905 | protein_coding | 1  | 156339003 | 156355011 | RHBG      |
| ENSG00000132680 | 8.711694395 | 9.315729406 | protein_coding | 1  | 155882834 | 155904191 | KIAA0907  |
| ENSG00000132681 | 0.869158192 | 0.390640832 | protein_coding | 1  | 160121360 | 160156767 | ATP1A4    |
| ENSG00000132688 | 10.38677526 | 9.449438015 | protein_coding | 1  | 156638555 | 156647189 | NES       |
| ENSG00000132692 | 5.550781289 | 6.470782801 | protein_coding | 1  | 156611182 | 156629324 | BCAN      |
| ENSG00000132694 | 9.612795809 | 9.868126104 | protein_coding | 1  | 156904632 | 157015162 | ARHGEF11  |
| ENSG00000132698 | 6.482942724 | 0.950786998 | protein_coding | 1  | 156030951 | 156040295 | RAB25     |
| ENSG00000132702 | 2.762599152 | 2.039052734 | protein_coding | 1  | 156589086 | 156595517 | HAPLN2    |
| ENSG00000132716 | 9.290757201 | 9.823765224 | protein_coding | 1  | 160185505 | 160254920 | DCAF8     |
| ENSG00000132718 | 2.847891871 | 4.274079748 | protein_coding | 1  | 155829300 | 155854990 | SYT11     |
| ENSG00000132740 | 8.793254009 | 8.847439299 | protein_coding | 11 | 68671310  | 68708070  | IGHMBP2   |
| ENSG00000132744 | 3.744048221 | 3.279072565 | protein_coding | 11 | 67410026  | 67418130  | ACY3      |
| ENSG00000132746 | 4.543379137 | 3.081239798 | protein_coding | 11 | 67429633  | 67448671  | ALDH3B2   |
| ENSG00000132749 | 8.08373006  | 8.017419471 | protein_coding | 11 | 68474908  | 68519032  | MTL5      |
| ENSG00000132763 | 7.127924785 | 7.246248121 | protein_coding | 1  | 45965725  | 45976739  | MMACHC    |
| ENSG00000132768 | 9.044272373 | 9.113519788 | protein_coding | 1  | 44435672  | 44439041  | DPH2      |
| ENSG00000132773 | 7.178195136 | 7.793067905 | protein_coding | 1  | 45805342  | 45809647  | TOE1      |
| ENSG00000132780 | 10.74290603 | 10.73172771 | protein_coding | 1  | 46049518  | 46084566  | NASP      |
| ENSG00000132781 | 7.062518763 | 7.73528765  | protein_coding | 1  | 45794835  | 45806142  | MUTYH     |
| ENSG00000132792 | 10.1653044  | 10.27132774 | protein_coding | 20 | 36322408  | 36500531  | CTNBL1    |
| ENSG00000132793 | 7.974178365 | 7.959118381 | protein_coding | 20 | 39969560  | 39989222  | LPIN3     |
| ENSG00000132801 | 5.958104008 | 6.582669759 | protein_coding | 20 | 44486256  | 44507761  | ZSWIM3    |
| ENSG00000132819 | 8.931561329 | 8.941691738 | protein_coding | 20 | 55966463  | 55984389  | RBM38     |
| ENSG00000132821 | 7.737655476 | 8.653849929 | protein_coding | 20 | 36531499  | 36573752  | VSTM2L    |
| ENSG00000132823 | 9.005353105 | 9.18617459  | protein_coding | 20 | 42825136  | 42839431  | C20orf111 |
| ENSG00000132824 | 10.58534145 | 10.54555896 | protein_coding | 20 | 43124862  | 43150750  | SERINC3   |
| ENSG00000132825 | 6.721980839 | 6.592001111 | protein_coding | 20 | 58511894  | 58515352  | PPP1R3D   |
| ENSG00000132832 | 2.10647801  | 2.652276565 | antisense      | 20 | 43285092  | 43324737  |           |
| ENSG00000132837 | 2.57521082  | 2.420525079 | protein_coding | 5  | 78293438  | 78531861  | DMGDH     |
| ENSG00000132840 | 3.004694206 | 0.390640832 | protein_coding | 5  | 78365540  | 78385289  | BHMT2     |
| ENSG00000132842 | 9.481327838 | 9.206061322 | protein_coding | 5  | 77296349  | 77590579  | AP3B1     |
| ENSG00000132846 | 7.423680977 | 6.904395923 | protein_coding | 5  | 76367897  | 76383148  | ZBED3     |
| ENSG00000132849 | 7.454602977 | 6.729413443 | protein_coding | 1  | 62208149  | 62629592  | INADL     |
| ENSG00000132855 | 0           | 0.950786998 | protein_coding | 1  | 63063158  | 63071830  | ANGPTL3   |
| ENSG00000132874 | 0.869158192 | 0           | protein_coding | 18 | 43194766  | 43263072  | SLC14A2   |
| ENSG00000132879 | 7.549958459 | 7.51752531  | protein_coding | 1  | 11714432  | 11723384  | FBXO44    |
| ENSG00000132881 | 5.072559152 | 5.294620694 | protein_coding | 1  | 16555170  | 16563495  | RSG1      |
| ENSG00000132906 | 6.17992145  | 6.376734172 | protein_coding | 1  | 15817327  | 15853029  | CASP9     |
| ENSG00000132912 | 9.030655728 | 9.069940847 | protein_coding | 5  | 150088002 | 150138671 | DCTN4     |
| ENSG00000132915 | 1.960915222 | 1.925536307 | protein_coding | 5  | 149237519 | 149324356 | PDE6A     |
| ENSG00000132932 | 1.407729925 | 1.518964905 | protein_coding | 13 | 25946209  | 26599989  | ATP8A2    |
| ENSG00000132938 | 1.16343121  | 0.390640832 | protein_coding | 13 | 29598748  | 30077892  | MTUS2     |
| ENSG00000132950 | 6.788216822 | 6.387491945 | protein_coding | 13 | 20397622  | 20437776  | ZMYM5     |
| ENSG00000132952 | 7.494827594 | 6.926693689 | protein_coding | 13 | 31191830  | 31233686  | USPL1     |
| ENSG00000132953 | 9.415619969 | 9.130429247 | protein_coding | 13 | 21351469  | 21477187  | XPO4      |
| ENSG00000132958 | 0.499066092 | 0           | protein_coding | 13 | 19997017  | 20110903  | TPTE2     |
| ENSG00000132963 | 9.122309386 | 8.908465794 | protein_coding | 13 | 29233241  | 29253062  | POMP      |
| ENSG00000132964 | 8.419473449 | 8.265014588 | protein_coding | 13 | 26828276  | 26979375  | CDK8      |

|                 |             |             |                |    |           |           |          |
|-----------------|-------------|-------------|----------------|----|-----------|-----------|----------|
| ENSG00000132965 | 1.960915222 | 1.802319292 | protein_coding | 13 | 31309645  | 31338556  | ALOX5AP  |
| ENSG00000132967 | 1.407729925 | 0.390640832 | pseudogene     | 3  | 22423310  | 22424420  | HMGB1P5  |
| ENSG00000132970 | 0.499066092 | 0           | protein_coding | 13 | 27131840  | 27263085  | WASF3    |
| ENSG00000132972 | 0.499066092 | 0           | protein_coding | 13 | 25338290  | 25454059  | RNF17    |
| ENSG00000132975 | 0           | 0.390640832 | protein_coding | 13 | 27329341  | 27334922  | GPR12    |
| ENSG00000133026 | 8.807962967 | 8.306700762 | protein_coding | 17 | 8377523   | 8534079   | MYH10    |
| ENSG00000133027 | 9.019209518 | 9.744392843 | protein_coding | 17 | 17408877  | 17495022  | PEMT     |
| ENSG00000133028 | 9.242353704 | 9.76979748  | protein_coding | 17 | 10583654  | 10600885  | SCO1     |
| ENSG00000133030 | 11.23809968 | 11.10730076 | protein_coding | 17 | 16946074  | 17088874  | MPRIP    |
| ENSG00000133048 | 4.712111592 | 5.187895122 | protein_coding | 1  | 203148059 | 203155877 | CHI3L1   |
| ENSG00000133055 | 0.499066092 | 0.697730409 | protein_coding | 1  | 203136939 | 203144941 | MYBPH    |
| ENSG00000133056 | 7.795160661 | 6.520498852 | protein_coding | 1  | 204391756 | 204463852 | PIK3C2B  |
| ENSG00000133059 | 7.81647827  | 7.88892877  | protein_coding | 1  | 205111632 | 205180727 | DSTYK    |
| ENSG00000133063 | 0           | 0.390640832 | protein_coding | 1  | 203181955 | 203242769 | CHIT1    |
| ENSG00000133065 | 9.05999771  | 9.003312166 | protein_coding | 1  | 205758221 | 205782876 | SLC41A1  |
| ENSG00000133067 | 0.869158192 | 1.667587519 | protein_coding | 1  | 202162938 | 202288909 | LGR6     |
| ENSG00000133069 | 5.316509574 | 5.878761167 | protein_coding | 1  | 205197304 | 205242471 | TMCC2    |
| ENSG00000133083 | 3.744048221 | 2.851901313 | protein_coding | 13 | 36343122  | 36705467  | DCLK1    |
| ENSG00000133101 | 4.409500985 | 3.813624741 | protein_coding | 13 | 37005967  | 37017019  | CCNA1    |
| ENSG00000133103 | 7.37062428  | 7.002128877 | protein_coding | 13 | 40229764  | 40365802  | COG6     |
| ENSG00000133104 | 8.830404061 | 8.68797299  | protein_coding | 13 | 36875775  | 36944317  | SPG20    |
| ENSG00000133106 | 3.502389126 | 0.950786998 | protein_coding | 13 | 43460524  | 43566407  | EPSTI1   |
| ENSG00000133107 | 1.407729925 | 0.390640832 | protein_coding | 13 | 38210773  | 38444562  | TRPC4    |
| ENSG00000133110 | 2.57521082  | 5.393992    | protein_coding | 13 | 38136720  | 38183563  | POSTN    |
| ENSG00000133111 | 5.498982484 | 5.43605125  | protein_coding | 13 | 37393361  | 37403241  | RFXAP    |
| ENSG00000133112 | 12.75768193 | 12.49262104 | protein_coding | 13 | 45911008  | 45915505  | TPT1     |
| ENSG00000133114 | 6.782811835 | 6.343971006 | protein_coding | 13 | 45563687  | 45607746  | KIAA1704 |
| ENSG00000133119 | 8.199812472 | 7.84667518  | protein_coding | 13 | 34392186  | 34540695  | RFC3     |
| ENSG00000133121 | 6.84118134  | 6.915587884 | protein_coding | 13 | 33677307  | 33924767  | STARD13  |
| ENSG00000133131 | 8.546104025 | 8.772475459 | protein_coding | X  | 106183964 | 106243474 | MORC4    |
| ENSG00000133134 | 0.499066092 | 0           | protein_coding | X  | 102564274 | 102565974 | BEX2     |
| ENSG00000133138 | 7.15746161  | 7.659647832 | protein_coding | X  | 106045910 | 106119375 | TBC1D8B  |
| ENSG00000133142 | 9.533752964 | 9.713197829 | protein_coding | X  | 102831159 | 102842657 | TCEAL4   |
| ENSG00000133149 | 0           | 0.390640832 | protein_coding | X  | 104463611 | 104465358 | TEX13A   |
| ENSG00000133193 | 8.460675529 | 8.454700467 | protein_coding | 17 | 71203492  | 71228510  | FAM104A  |
| ENSG00000133195 | 8.162840364 | 7.688207601 | protein_coding | 17 | 70642086  | 71088853  | SLC39A11 |
| ENSG00000133216 | 9.242353704 | 8.824861692 | protein_coding | 1  | 23037332  | 23241818  | EPHB2    |
| ENSG00000133226 | 10.2733163  | 10.02663303 | protein_coding | 1  | 24958207  | 24999758  | SRRM1    |
| ENSG00000133243 | 11.35584576 | 11.03559117 | protein_coding | 19 | 1985447   | 2015702   | BTBD2    |
| ENSG00000133246 | 3.744048221 | 3.183544561 | protein_coding | 19 | 8554941   | 8567522   | PRAM1    |
| ENSG00000133247 | 8.417730894 | 8.703122764 | protein_coding | 19 | 55851221  | 55859488  | SUV420H2 |
| ENSG00000133250 | 7.748787017 | 7.688207601 | protein_coding | 19 | 8575463   | 8579048   | ZNF414   |
| ENSG00000133256 | 1.16343121  | 0.697730409 | protein_coding | 4  | 619373    | 664571    | PDE6B    |
| ENSG00000133265 | 10.40931148 | 10.22071743 | protein_coding | 19 | 55773592  | 55791751  | HSPBP1   |
| ENSG00000133275 | 11.09333086 | 11.10750411 | protein_coding | 19 | 1941161   | 1981309   | CSNK1G2  |
| ENSG00000133302 | 7.44778847  | 7.343375265 | protein_coding | 5  | 93954052  | 94075141  | ANKRD32  |
| ENSG00000133313 | 10.4819869  | 10.65199776 | protein_coding | 18 | 72163443  | 72190687  | CNDP2    |
| ENSG00000133315 | 9.023798905 | 9.198444985 | protein_coding | 11 | 63766030  | 63933578  | MACROD1  |
| ENSG00000133316 | 9.054401174 | 9.250197244 | protein_coding | 11 | 62599814  | 62609281  | WDR74    |
| ENSG00000133317 | 1.407729925 | 0.390640832 | protein_coding | 11 | 63273556  | 63284246  | LGALS12  |
| ENSG00000133318 | 10.76910987 | 10.75916755 | protein_coding | 11 | 63448918  | 63527363  | RTN3     |
| ENSG00000133321 | 5.255381949 | 4.640685763 | protein_coding | 11 | 63304281  | 63313934  | RARRES3  |
| ENSG00000133328 | 1.16343121  | 1.16600992  | protein_coding | 11 | 63320242  | 63330855  | HRASLS2  |
| ENSG00000133392 | 4.517578978 | 4.903073497 | protein_coding | 16 | 15796992  | 15950890  | MYH11    |
| ENSG00000133393 | 8.295907473 | 8.163833676 | protein_coding | 16 | 15959576  | 15982472  | FOPNL    |
| ENSG00000133398 | 8.753741308 | 8.506198656 | protein_coding | 5  | 6371994   | 6378707   | MED10    |
| ENSG00000133401 | 4.517578978 | 3.232099092 | protein_coding | 5  | 31639517  | 32111037  | PDZD2    |
| ENSG00000133422 | 10.67231523 | 10.4342086  | protein_coding | 22 | 31322596  | 31364284  | MORC2    |
| ENSG00000133424 | 7.262161623 | 7.343375265 | protein_coding | 22 | 33561991  | 34318829  | LARGE    |
| ENSG00000133433 | 3.146112541 | 3.608232228 | protein_coding | 22 | 24299601  | 24303373  | GSTT2B   |
| ENSG00000133454 | 1.16343121  | 1.353254395 | protein_coding | 22 | 26138111  | 26427007  | MYO18B   |
| ENSG00000133460 | 6.640654398 | 6.858739095 | protein_coding | 22 | 24198890  | 24231170  | SLC2A11  |
| ENSG00000133466 | 9.834054211 | 10.12713712 | protein_coding | 22 | 37576207  | 37595425  | C1QTNF6  |

|                 |             |             |                |    |           |           |           |
|-----------------|-------------|-------------|----------------|----|-----------|-----------|-----------|
| ENSG00000133477 | 6.305850085 | 3.027231696 | protein_coding | 22 | 40390953  | 40426043  | FAM83F    |
| ENSG00000133488 | 7.8607586   | 8.075120324 | protein_coding | 22 | 30884900  | 30901698  | SEC14L4   |
| ENSG00000133519 | 2.471521042 | 2.652276565 | pseudogene     | 22 | 23732793  | 23744913  | ZDHHHC8P1 |
| ENSG00000133561 | 1.407729925 | 0.697730409 | protein_coding | 7  | 150322463 | 150329473 | GIMAP6    |
| ENSG00000133574 | 0.499066092 | 0.950786998 | protein_coding | 7  | 150264365 | 150271041 | GIMAP4    |
| ENSG00000133597 | 7.686472517 | 7.392265003 | protein_coding | 7  | 140372953 | 140396061 | ADCK2     |
| ENSG00000133606 | 10.05696733 | 9.827226448 | protein_coding | 7  | 140152840 | 140179369 | MKRN1     |
| ENSG00000133612 | 10.73523103 | 10.64136335 | protein_coding | 7  | 150782918 | 150841523 | AGAP3     |
| ENSG00000133619 | 8.004679484 | 8.5924114   | protein_coding | 7  | 149411872 | 149431664 | KRBA1     |
| ENSG00000133624 | 6.095241663 | 6.758710666 | pseudogene     | 7  | 149244245 | 149321843 | ZNF767    |
| ENSG00000133627 | 7.242608348 | 6.628734426 | protein_coding | 7  | 152456834 | 152552463 | ACTR3B    |
| ENSG00000133639 | 9.101836412 | 9.122401836 | protein_coding | 12 | 92536286  | 92539673  | BTG1      |
| ENSG00000133640 | 2.671945279 | 2.851901313 | protein_coding | 12 | 85430092  | 85657002  | LRR1Q1    |
| ENSG00000133641 | 7.568924112 | 7.922602475 | protein_coding | 12 | 88427623  | 88443937  | C12orf29  |
| ENSG00000133657 | 11.49373351 | 11.44435203 | protein_coding | 3  | 194123401 | 194219093 | ATP13A3   |
| ENSG00000133661 | 0.499066092 | 0.390640832 | protein_coding | 10 | 81697496  | 81742370  | SFTPD     |
| ENSG00000133665 | 1.16343121  | 2.144285137 | protein_coding | 10 | 82104501  | 82127829  | DYDC2     |
| ENSG00000133678 | 7.084651883 | 7.836897019 | protein_coding | 10 | 81838402  | 81852313  | C10orf57  |
| ENSG00000133687 | 0.499066092 | 0.697730409 | protein_coding | 12 | 29653757  | 29937692  | TMTC1     |
| ENSG00000133703 | 8.75650134  | 8.487570409 | protein_coding | 12 | 25357723  | 25403870  | KRAS      |
| ENSG00000133704 | 9.806352596 | 9.305130221 | protein_coding | 12 | 30781922  | 30848920  | IPO8      |
| ENSG00000133706 | 10.86366171 | 10.62554732 | protein_coding | 5  | 145492601 | 145562223 | LARS      |
| ENSG00000133710 | 5.054730169 | 5.306006045 | protein_coding | 5  | 147405246 | 147516852 | SPINK5    |
| ENSG00000133731 | 7.140657543 | 7.073814954 | protein_coding | 8  | 82570196  | 82598928  | IMPA1     |
| ENSG00000133739 | 6.931877181 | 6.110690132 | protein_coding | 8  | 86019323  | 86058315  | LRRCC1    |
| ENSG00000133740 | 6.400645076 | 6.398170093 | protein_coding | 8  | 86089460  | 86129387  | E2F5      |
| ENSG00000133742 | 0.499066092 | 0.390640832 | protein_coding | 8  | 86239837  | 86291243  | CA1       |
| ENSG00000133773 | 7.517784241 | 7.782918269 | protein_coding | 12 | 82617460  | 82752584  | CCDC59    |
| ENSG00000133789 | 9.222528249 | 9.197681135 | protein_coding | 11 | 9685624   | 9774538   | SWAP70    |
| ENSG00000133794 | 7.210761201 | 7.519971735 | protein_coding | 11 | 13298199  | 13408813  | ARNTL     |
| ENSG00000133800 | 0           | 0.390640832 | protein_coding | 11 | 10578513  | 10633236  | LYVE1     |
| ENSG00000133805 | 7.67484765  | 8.210017866 | protein_coding | 11 | 10329860  | 10529126  | AMPD3     |
| ENSG00000133808 | 5.316509574 | 4.048652948 | protein_coding | 11 | 12297627  | 12380691  | MICALCL   |
| ENSG00000133812 | 8.807962967 | 8.685795691 | protein_coding | 11 | 9800214   | 10315754  | SBF2      |
| ENSG00000133816 | 11.05488931 | 11.11965282 | protein_coding | 11 | 12115543  | 12285334  | MICAL2    |
| ENSG00000133818 | 9.692784215 | 9.847334256 | protein_coding | 11 | 14299472  | 14386052  | RRAS2     |
| ENSG00000133835 | 9.959126666 | 9.572977394 | protein_coding | 5  | 118788138 | 118878028 | HSD17B4   |
| ENSG00000133858 | 8.605481314 | 8.354088029 | protein_coding | 12 | 72003252  | 72061505  | ZFC3H1    |
| ENSG00000133863 | 8.448779323 | 8.588920207 | protein_coding | 8  | 30689060  | 30748122  | TEX15     |
| ENSG00000133872 | 9.661466274 | 10.04075742 | protein_coding | 8  | 29920528  | 29940723  | TMEM66    |
| ENSG00000133874 | 5.81716234  | 5.555337277 | protein_coding | 8  | 33405273  | 33424643  | RNF122    |
| ENSG00000133884 | 9.290757201 | 9.450079579 | protein_coding | 11 | 65101225  | 65120720  | DPF2      |
| ENSG00000133895 | 9.850940035 | 9.862353807 | protein_coding | 11 | 64570988  | 64578766  | MEN1      |
| ENSG00000133935 | 8.610066544 | 8.32500368  | protein_coding | 14 | 76116134  | 76127532  | C14orf1   |
| ENSG00000133943 | 7.743231983 | 6.866449614 | protein_coding | 14 | 91526677  | 91691703  | C14orf159 |
| ENSG00000133958 | 0.869158192 | 0.950786998 | protein_coding | 14 | 93799565  | 94174222  | UNC9      |
| ENSG00000133961 | 10.13274625 | 10.15219202 | protein_coding | 14 | 73741815  | 73930348  | NUMB      |
| ENSG00000133962 | 0.869158192 | 0.390640832 | protein_coding | 14 | 92047040  | 92247051  | CATSPERB  |
| ENSG00000133980 | 0.499066092 | 0.390640832 | protein_coding | 14 | 74769772  | 74826711  | VRTN      |
| ENSG00000133983 | 7.511262389 | 8.203944731 | protein_coding | 14 | 70792102  | 70826448  | COX16     |
| ENSG00000133985 | 4.842525946 | 5.317302248 | protein_coding | 14 | 71108504  | 71142077  | TTC9      |
| ENSG00000133997 | 8.066039442 | 7.926295939 | protein_coding | 14 | 71047974  | 71067384  | MED6      |
| ENSG00000134001 | 11.0328605  | 11.31085514 | protein_coding | 14 | 67826714  | 67853233  | EIF2S1    |
| ENSG00000134007 | 1.16343121  | 2.242360793 | protein_coding | 14 | 70989078  | 71001732  | ADAM20    |
| ENSG00000134013 | 12.07763287 | 12.8499187  | protein_coding | 8  | 23154702  | 23282841  | LOXL2     |
| ENSG00000134014 | 8.385999544 | 8.517261232 | protein_coding | 8  | 27947190  | 28048673  | ELP3      |
| ENSG00000134030 | 8.959377969 | 8.93803753  | protein_coding | 18 | 46065417  | 46389588  | CTIF      |
| ENSG00000134046 | 9.477150759 | 9.453922984 | protein_coding | 18 | 51677971  | 51751158  | MBD2      |
| ENSG00000134049 | 8.278730502 | 8.935290787 | protein_coding | 18 | 44681413  | 44702745  | IER3IP1   |
| ENSG00000134056 | 6.502803968 | 6.628734426 | protein_coding | 5  | 68513587  | 68525956  | MIRPS36   |
| ENSG00000134057 | 10.74255805 | 10.58347835 | protein_coding | 5  | 68462837  | 68474072  | CCNB1     |
| ENSG00000134058 | 8.438503912 | 8.496293532 | protein_coding | 5  | 68530668  | 68573250  | CDK7      |
| ENSG00000134070 | 9.749993326 | 9.806834418 | protein_coding | 3  | 10206549  | 10285427  | IRAK2     |

|                 |             |             |                |    |           |           |           |
|-----------------|-------------|-------------|----------------|----|-----------|-----------|-----------|
| ENSG00000134072 | 7.169937448 | 7.782918269 | protein_coding | 3  | 9799026   | 9811676   | CAMK1     |
| ENSG00000134077 | 8.617676359 | 8.362291274 | protein_coding | 3  | 9404526   | 9428475   | THUMPD3   |
| ENSG00000134086 | 9.681936396 | 9.542017285 | protein_coding | 3  | 10182692  | 10193904  | VHL       |
| ENSG00000134107 | 11.54132321 | 10.4653237  | protein_coding | 3  | 5020801   | 5027008   | BHLHE40   |
| ENSG00000134108 | 9.528110879 | 9.678578614 | protein_coding | 3  | 5163905   | 5222596   | ARL8B     |
| ENSG00000134109 | 9.402463961 | 8.906597279 | protein_coding | 3  | 5229331   | 5261642   | EDEM1     |
| ENSG00000134138 | 7.413224588 | 7.287036562 | protein_coding | 15 | 37181409  | 37393504  | MEIS2     |
| ENSG00000134146 | 6.704935538 | 5.792353798 | protein_coding | 15 | 35509546  | 35838394  | ATPBD4    |
| ENSG00000134152 | 7.654275977 | 7.644032061 | protein_coding | 15 | 34432875  | 34502297  | C15orf29  |
| ENSG00000134153 | 8.05038018  | 8.552341023 | protein_coding | 15 | 34376218  | 34394149  | C15orf24  |
| ENSG00000134183 | 3.077135474 | 3.493416095 | protein_coding | 1  | 110145889 | 110155679 | GNAT2     |
| ENSG00000134186 | 9.345859976 | 9.389159064 | protein_coding | 1  | 109234945 | 109244425 | PRPF38B   |
| ENSG00000134198 | 2.928422289 | 2.971122874 | protein_coding | 1  | 115590632 | 115632121 | TSPAN2    |
| ENSG00000134201 | 0           | 0.950786998 | protein_coding | 1  | 110254877 | 110260888 | GSTM5     |
| ENSG00000134202 | 7.37062428  | 7.397596322 | protein_coding | 1  | 110276554 | 110284384 | GSTM3     |
| ENSG00000134207 | 0           | 0.390640832 | protein_coding | 1  | 114631914 | 114696541 | SYT6      |
| ENSG00000134215 | 4.883502971 | 4.508954154 | protein_coding | 1  | 108113782 | 108507766 | VAV3      |
| ENSG00000134222 | 7.800519667 | 7.973469823 | protein_coding | 1  | 109822178 | 109825808 | PSRC1     |
| ENSG00000134242 | 4.491309013 | 4.226940739 | protein_coding | 1  | 114356433 | 114414381 | PTPN22    |
| ENSG00000134243 | 6.236372259 | 8.117738058 | protein_coding | 1  | 109852192 | 109940573 | SORT1     |
| ENSG00000134245 | 3.652182994 | 3.935919592 | protein_coding | 1  | 113009163 | 113065288 | WNT2B     |
| ENSG00000134247 | 9.046529371 | 7.714077892 | protein_coding | 1  | 117452679 | 117532980 | PTGFRN    |
| ENSG00000134248 | 7.746012174 | 8.443145654 | protein_coding | 1  | 110943871 | 110950564 | HBXIP     |
| ENSG00000134250 | 11.15267838 | 11.16724979 | protein_coding | 1  | 120454176 | 120612240 | NOTCH2    |
| ENSG00000134253 | 5.239686603 | 5.893930351 | protein_coding | 1  | 117653682 | 117665209 | TRIM45    |
| ENSG00000134255 | 7.562629889 | 7.733180651 | protein_coding | 1  | 111682249 | 111727724 | CEPT1     |
| ENSG00000134256 | 1.407729925 | 0.390640832 | protein_coding | 1  | 117544382 | 117579167 | CD101     |
| ENSG00000134258 | 0           | 1.16600992  | protein_coding | 1  | 117686209 | 117753556 | VTCN1     |
| ENSG00000134259 | 3.744048221 | 5.496926774 | protein_coding | 1  | 115828539 | 115880857 | NGF       |
| ENSG00000134262 | 6.989320791 | 7.423961341 | protein_coding | 1  | 114437370 | 114447823 | AP4B1     |
| ENSG00000134265 | 8.393111514 | 8.286726732 | protein_coding | 18 | 10525873  | 10552762  | NAPG      |
| ENSG00000134278 | 9.680483837 | 9.339469783 | protein_coding | 18 | 12446511  | 12658133  | SPIRE1    |
| ENSG00000134283 | 9.280246895 | 9.358048031 | protein_coding | 12 | 42632249  | 42853517  | PPHLN1    |
| ENSG00000134285 | 8.565120083 | 8.306700762 | protein_coding | 12 | 49315301  | 49320257  | FKBP11    |
| ENSG00000134287 | 10.56423086 | 10.06063822 | protein_coding | 12 | 49297286  | 49351334  | ARF3      |
| ENSG00000134291 | 8.833021386 | 9.443006635 | protein_coding | 12 | 48357352  | 48362661  | TMEM106C  |
| ENSG00000134294 | 12.20584638 | 11.88961056 | protein_coding | 12 | 46751972  | 46766650  | SLC38A2   |
| ENSG00000134297 | 5.613019223 | 5.57429348  | pseudogene     | 12 | 45566847  | 45609824  | PLEKHA8P1 |
| ENSG00000134308 | 12.09518276 | 11.54282244 | protein_coding | 2  | 9724101   | 9771143   | YWHAQ     |
| ENSG00000134313 | 8.981959173 | 8.547552846 | protein_coding | 2  | 8865408   | 8977760   | KIDINS220 |
| ENSG00000134317 | 5.707331524 | 5.187895122 | protein_coding | 2  | 10085341  | 10142411  | GRHL1     |
| ENSG00000134318 | 9.529725156 | 8.891561392 | protein_coding | 2  | 11319887  | 11488456  | ROCK2     |
| ENSG00000134321 | 7.222786417 | 6.984522608 | protein_coding | 2  | 7005937   | 7038370   | RSAD2     |
| ENSG00000134324 | 9.708548245 | 8.540340653 | protein_coding | 2  | 11817721  | 11967535  | LPIN1     |
| ENSG00000134326 | 6.670228606 | 6.25865215  | protein_coding | 2  | 6980701   | 7006766   | CMPK2     |
| ENSG00000134330 | 7.925957035 | 7.568048738 | protein_coding | 2  | 9613787   | 9636672   | IAH1      |
| ENSG00000134333 | 14.27775723 | 14.66120029 | protein_coding | 11 | 18415935  | 18429972  | LDHA      |
| ENSG00000134339 | 7.178195136 | 6.530239731 | protein_coding | 11 | 18260770  | 18270190  | SAA2      |
| ENSG00000134352 | 10.81682972 | 10.81651536 | protein_coding | 5  | 55230923  | 55290772  | IL6ST     |
| ENSG00000134363 | 4.230497448 | 1.16600992  | protein_coding | 5  | 52776239  | 52782964  | FST       |
| ENSG00000134369 | 9.38294884  | 8.69123279  | protein_coding | 1  | 201592411 | 201796102 | NAV1      |
| ENSG00000134371 | 8.646233023 | 8.820898829 | protein_coding | 1  | 193091147 | 193223031 | CDC73     |
| ENSG00000134375 | 9.019209518 | 9.057364358 | protein_coding | 1  | 201924619 | 201939789 | TIMM17A   |
| ENSG00000134376 | 0           | 0.697730409 | protein_coding | 1  | 197170592 | 197447585 | CRB1      |
| ENSG00000134398 | 1.407729925 | 1.16600992  | protein_coding | 16 | 23701647  | 23724821  | ERN2      |
| ENSG00000134419 | 9.12764907  | 9.750655873 | protein_coding | 16 | 18636822  | 18801705  | RPS15A    |
| ENSG00000134440 | 10.73032559 | 11.01210492 | protein_coding | 18 | 55267896  | 55289177  | NARS      |
| ENSG00000134443 | 0           | 0.390640832 | protein_coding | 18 | 56887400  | 56898006  | GRP       |
| ENSG00000134444 | 8.267164507 | 8.180940029 | protein_coding | 18 | 59854507  | 59974355  | KIAA1468  |
| ENSG00000134452 | 9.43383913  | 9.08571528  | protein_coding | 10 | 5931535   | 5979556   | FBXO18    |
| ENSG00000134453 | 9.847060811 | 9.673093524 | protein_coding | 10 | 6130949   | 6159420   | RBM17     |
| ENSG00000134460 | 0           | 0.697730409 | protein_coding | 10 | 6052652   | 6104333   | IL2RA     |
| ENSG00000134461 | 5.929039784 | 5.32851069  | protein_coding | 10 | 5903689   | 5931869   | ANKRD16   |

|                 |             |             |                |    |           |           |          |
|-----------------|-------------|-------------|----------------|----|-----------|-----------|----------|
| ENSG00000134463 | 7.627388205 | 7.019522872 | protein_coding | 10 | 11784365  | 11806069  | ECHDC3   |
| ENSG00000134470 | 9.000704568 | 8.405271149 | protein_coding | 10 | 5991038   | 6020150   | IL15RA   |
| ENSG00000134480 | 8.421213901 | 8.322202916 | protein_coding | 5  | 86687311  | 86708836  | CCNH     |
| ENSG00000134489 | 1.407729925 | 0.950786998 | protein_coding | 18 | 22040593  | 22059921  | HRH4     |
| ENSG00000134490 | 7.420203928 | 6.525377513 | protein_coding | 18 | 20777719  | 21017925  | TMEM241  |
| ENSG00000134504 | 7.712290964 | 7.819127564 | protein_coding | 18 | 24034874  | 24209206  | KCTD1    |
| ENSG00000134508 | 7.89873181  | 6.95589788  | protein_coding | 18 | 20714528  | 20840434  | CABLES1  |
| ENSG00000134516 | 1.407729925 | 2.420525079 | protein_coding | 5  | 169064251 | 169510386 | DOCK2    |
| ENSG00000134531 | 9.06334524  | 7.985911283 | protein_coding | 12 | 13349650  | 13369708  | EMP1     |
| ENSG00000134533 | 6.138202758 | 6.16171561  | protein_coding | 12 | 15260717  | 15501609  | RERG     |
| ENSG00000134539 | 0.499066092 | 0.390640832 | protein_coding | 12 | 10378657  | 10469850  | KLRD1    |
| ENSG00000134545 | 3.004694206 | 1.925536307 | protein_coding | 12 | 10594863  | 10607284  | KLRC1    |
| ENSG00000134548 | 2.471521042 | 2.144285137 | protein_coding | 12 | 21679241  | 21690311  | C12orf39 |
| ENSG00000134551 | 0.499066092 | 0.697730409 | protein_coding | 12 | 11081835  | 11086368  | PRH2     |
| ENSG00000134569 | 5.389447744 | 5.059245468 | protein_coding | 11 | 46878419  | 46940193  | LRP4     |
| ENSG00000134571 | 0           | 0.390640832 | protein_coding | 11 | 47352957  | 47374253  | MYBPC3   |
| ENSG00000134574 | 8.219950371 | 8.149685112 | protein_coding | 11 | 47236493  | 47260767  | DDB2     |
| ENSG00000134575 | 8.64474405  | 9.002437654 | protein_coding | 11 | 47260853  | 47270457  | ACP2     |
| ENSG00000134590 | 9.882235894 | 10.34112548 | protein_coding | X  | 134166333 | 134167576 | FAM127A  |
| ENSG00000134594 | 2.10647801  | 1.802319292 | protein_coding | X  | 129305623 | 129318844 | RAB33A   |
| ENSG00000134597 | 7.527512071 | 7.507697912 | protein_coding | X  | 129535943 | 129547317 | RBMX2    |
| ENSG00000134627 | 3.78787645  | 4.250702764 | protein_coding | 11 | 94277006  | 94354587  | PIWIL4   |
| ENSG00000134644 | 9.957928125 | 9.913491433 | protein_coding | 1  | 31404353  | 31538838  | PUM1     |
| ENSG00000134668 | 7.356139979 | 7.510161044 | protein_coding | 1  | 32256023  | 32281652  | SPOCD1   |
| ENSG00000134684 | 11.50115796 | 11.47257006 | protein_coding | 1  | 33240840  | 33283754  | YARS     |
| ENSG00000134686 | 9.96986896  | 10.01627318 | protein_coding | 1  | 33789224  | 33896653  | PHC2     |
| ENSG00000134690 | 9.243337861 | 9.240587696 | protein_coding | 1  | 38158090  | 38175391  | CDCA8    |
| ENSG00000134697 | 9.49130376  | 9.540210691 | protein_coding | 1  | 38032417  | 38061540  | GNL2     |
| ENSG00000134698 | 7.003331296 | 7.053694091 | protein_coding | 1  | 36273773  | 36323491  | EIF2C4   |
| ENSG00000134709 | 4.593635215 | 0.390640832 | protein_coding | 1  | 60280458  | 60342050  | HOOK1    |
| ENSG00000134716 | 2.35979773  | 1.518964905 | protein_coding | 1  | 60358980  | 60392462  | CYP2J2   |
| ENSG00000134717 | 7.911170638 | 8.073455769 | protein_coding | 1  | 52521797  | 52556388  | BTF3L4   |
| ENSG00000134744 | 8.741255403 | 9.097229165 | protein_coding | 1  | 52873954  | 53019159  | ZCCHC11  |
| ENSG00000134748 | 8.292108003 | 8.363653959 | protein_coding | 1  | 52870236  | 52883992  | PRPF38A  |
| ENSG00000134755 | 6.704935538 | 4.841813558 | protein_coding | 18 | 28645940  | 28682378  | DSC2     |
| ENSG00000134758 | 8.209916558 | 8.260632671 | protein_coding | 18 | 29671828  | 29711524  | RNF138   |
| ENSG00000134759 | 9.172772397 | 9.229419632 | protein_coding | 18 | 33709407  | 33757909  | ELP2     |
| ENSG00000134762 | 0.499066092 | 0           | protein_coding | 18 | 28570052  | 28622781  | DSC3     |
| ENSG00000134765 | 0           | 0.390640832 | protein_coding | 18 | 28709199  | 28742819  | DSC1     |
| ENSG00000134769 | 4.352265886 | 7.786986696 | protein_coding | 18 | 32073254  | 32471808  | DTNA     |
| ENSG00000134775 | 8.723027268 | 7.720473624 | protein_coding | 18 | 33877702  | 34360018  | FHOD3    |
| ENSG00000134779 | 9.462857538 | 9.501740056 | protein_coding | 18 | 34376035  | 34409158  | TPGS2    |
| ENSG00000134780 | 7.413224588 | 7.512619979 | protein_coding | 11 | 61447905  | 61514473  | DAGLA    |
| ENSG00000134802 | 9.562425908 | 10.52500144 | protein_coding | 11 | 57174427  | 57195053  | SLC43A3  |
| ENSG00000134809 | 8.101206377 | 8.734007291 | protein_coding | 11 | 57295936  | 57298276  | TIMM10   |
| ENSG00000134812 | 0           | 0.697730409 | protein_coding | 11 | 59596741  | 59612974  | GIF      |
| ENSG00000134815 | 9.348606364 | 9.356680039 | protein_coding | 19 | 47852538  | 47889887  | DHX34    |
| ENSG00000134824 | 11.02200542 | 9.679673133 | protein_coding | 11 | 61583728  | 61634826  | FADS2    |
| ENSG00000134825 | 5.827699195 | 6.403479675 | protein_coding | 11 | 61556435  | 61560274  | C11orf10 |
| ENSG00000134827 | 3.393122761 | 1.667587519 | protein_coding | 11 | 59620273  | 59634048  | TCN1     |
| ENSG00000134830 | 0.499066092 | 0           | protein_coding | 19 | 47844040  | 47845272  | GPR77    |
| ENSG00000134851 | 9.248248601 | 9.627311386 | protein_coding | 4  | 56262124  | 56292339  | TMEM165  |
| ENSG00000134852 | 8.741255403 | 9.136021975 | protein_coding | 4  | 56294070  | 56413305  | CLOCK    |
| ENSG00000134864 | 3.871730003 | 4.406904905 | protein_coding | 13 | 101183801 | 101241782 | A2LD1    |
| ENSG00000134871 | 1.16343121  | 0.950786998 | protein_coding | 13 | 110958159 | 111165374 | COL4A2   |
| ENSG00000134873 | 1.16343121  | 0.697730409 | protein_coding | 13 | 96085858  | 96231906  | CLDN10   |
| ENSG00000134874 | 0.499066092 | 0.950786998 | protein_coding | 13 | 96230457  | 96296957  | DZIP1    |
| ENSG00000134882 | 9.259966624 | 9.041275118 | protein_coding | 13 | 99853028  | 100038688 | UBAC2    |
| ENSG00000134884 | 9.416492786 | 9.639175184 | protein_coding | 13 | 107194021 | 107220512 | ARGLU1   |
| ENSG00000134897 | 7.451199747 | 7.596144237 | protein_coding | 13 | 103451399 | 103493885 | BIVM     |
| ENSG00000134899 | 8.614637248 | 8.48506837  | protein_coding | 13 | 103459705 | 103528345 | ERCC5    |
| ENSG00000134900 | 9.035208904 | 8.924251218 | protein_coding | 13 | 103249353 | 103331521 | TPP2     |
| ENSG00000134901 | 7.084651883 | 7.797107849 | protein_coding | 13 | 103436631 | 103451357 | KDELC1   |

|                 |             |             |                  |    |           |           |          |
|-----------------|-------------|-------------|------------------|----|-----------|-----------|----------|
| ENSG00000134905 | 9.287898339 | 9.474880612 | protein_coding   | 13 | 111290133 | 111365950 | CARS2    |
| ENSG00000134909 | 8.895705979 | 8.764244491 | protein_coding   | 11 | 128834989 | 129149219 | ARHGAP32 |
| ENSG00000134910 | 11.87665589 | 12.07561565 | protein_coding   | 11 | 125461607 | 125495110 | STT3A    |
| ENSG00000134917 | 0.499066092 | 1.353254395 | protein_coding   | 11 | 130274820 | 130298888 | ADAMTS8  |
| ENSG00000134940 | 3.335220907 | 4.226940739 | protein_coding   | 11 | 125541417 | 125551018 | ACRV1    |
| ENSG00000134954 | 11.04335201 | 10.79015471 | protein_coding   | 11 | 128328656 | 128457437 | ETS1     |
| ENSG00000134955 | 7.837485466 | 6.866449614 | protein_coding   | 11 | 124932963 | 124959131 | SLC37A2  |
| ENSG00000134962 | 2.35979773  | 1.667587519 | protein_coding   | 4  | 39408473  | 39453156  | KLB      |
| ENSG00000134970 | 10.30052049 | 9.746483542 | protein_coding   | 5  | 114949205 | 114968689 | TMED7    |
| ENSG00000134982 | 9.150911694 | 8.84060518  | protein_coding   | 5  | 112043195 | 112181936 | APC      |
| ENSG00000134986 | 8.02999382  | 9.042977197 | protein_coding   | 5  | 110998318 | 111333161 | C5orf13  |
| ENSG00000134987 | 9.761717462 | 9.416334062 | protein_coding   | 5  | 110427414 | 110466200 | WDR36    |
| ENSG00000134996 | 8.371669553 | 8.191721221 | protein_coding   | 9  | 77703459  | 77762181  | OSTF1    |
| ENSG00000135002 | 8.479173607 | 8.437980325 | protein_coding   | 9  | 79000433  | 79009433  | RFK      |
| ENSG00000135018 | 11.2368649  | 10.9758086  | protein_coding   | 9  | 86274878  | 86323118  | UBQLN1   |
| ENSG00000135040 | 8.647720461 | 8.794871435 | protein_coding   | 9  | 88556061  | 88637213  | NAA35    |
| ENSG00000135045 | 7.326727684 | 8.159132889 | protein_coding   | 9  | 77561497  | 77567802  | C9orf40  |
| ENSG00000135046 | 12.97410379 | 12.35226715 | protein_coding   | 9  | 75766673  | 75785309  | ANXA1    |
| ENSG00000135047 | 10.18182545 | 10.15652241 | protein_coding   | 9  | 90340434  | 90346308  | CTSL1    |
| ENSG00000135048 | 8.66103884  | 8.844514354 | protein_coding   | 9  | 74298282  | 74431606  | TMEM2    |
| ENSG00000135049 | 8.472474444 | 8.792849743 | protein_coding   | 9  | 88161455  | 88356944  | AGTPBP1  |
| ENSG00000135052 | 10.68178411 | 10.97179319 | protein_coding   | 9  | 88641061  | 88715088  | GOLM1    |
| ENSG00000135063 | 5.83815965  | 6.811590016 | protein_coding   | 9  | 71939488  | 72007371  | FAM189A2 |
| ENSG00000135069 | 11.16051428 | 11.22649291 | protein_coding   | 9  | 80912043  | 80945009  | PSAT1    |
| ENSG00000135070 | 8.032273249 | 8.43019749  | protein_coding   | 9  | 88879461  | 88897676  | ISCA1    |
| ENSG00000135074 | 2.847891871 | 1.16600992  | protein_coding   | 5  | 156822542 | 157002783 | ADAM19   |
| ENSG00000135077 | 1.616589159 | 0           | protein_coding   | 5  | 156512843 | 156569880 | HAVCR2   |
| ENSG00000135083 | 6.35766608  | 6.136428444 | protein_coding   | 5  | 159678659 | 159772403 | CCNJL    |
| ENSG00000135090 | 8.764749894 | 8.005247922 | protein_coding   | 12 | 118587606 | 118810750 | TAKO3    |
| ENSG00000135093 | 6.716321419 | 6.646756201 | protein_coding   | 12 | 109460894 | 109525831 | USP30    |
| ENSG00000135094 | 2.671945279 | 2.144285137 | protein_coding   | 12 | 113830250 | 113841693 | SDS      |
| ENSG00000135097 | 0           | 0.697730409 | protein_coding   | 12 | 120779133 | 120806983 | MSI1     |
| ENSG00000135100 | 3.652182994 | 3.279072565 | protein_coding   | 12 | 121416346 | 121442296 | HNF1A    |
| ENSG00000135108 | 8.649206367 | 8.458531597 | protein_coding   | 12 | 117581146 | 117628336 | FBXO21   |
| ENSG00000135114 | 8.830404061 | 8.191721221 | protein_coding   | 12 | 121458121 | 121477045 | OASL     |
| ENSG00000135116 | 2.35979773  | 3.32456471  | protein_coding   | 12 | 117298932 | 117319232 | HRK      |
| ENSG00000135119 | 4.821592551 | 5.150490275 | protein_coding   | 12 | 117176096 | 117291436 | RNFT2    |
| ENSG00000135124 | 7.663128351 | 8.125791388 | protein_coding   | 12 | 121647660 | 121671909 | P2RX4    |
| ENSG00000135127 | 5.785082014 | 2.501982735 | protein_coding   | 12 | 120427648 | 120532298 | CCDC64   |
| ENSG00000135144 | 2.238690726 | 1.925536307 | protein_coding   | 12 | 113494514 | 113535833 | DTX1     |
| ENSG00000135148 | 9.31529953  | 8.245929405 | protein_coding   | 12 | 112563305 | 112591407 | TRAFD1   |
| ENSG00000135164 | 9.230491154 | 9.189251987 | protein_coding   | 7  | 86781677  | 86825646  | DMTF1    |
| ENSG00000135185 | 7.603059879 | 7.03670965  | protein_coding   | 7  | 86825478  | 86849903  | C7orf23  |
| ENSG00000135205 | 3.211941663 | 3.532712221 | protein_coding   | 7  | 76751751  | 76958850  | CCDC146  |
| ENSG00000135211 | 7.2307479   | 6.930376707 | protein_coding   | 7  | 77423045  | 77427897  | TMEM60   |
| ENSG00000135213 | 9.034071956 | 8.120964787 | protein_coding   | 7  | 75046066  | 75115548  | POM121C  |
| ENSG00000135218 | 0.499066092 | 0.697730409 | protein_coding   | 7  | 79998891  | 80308593  | CD36     |
| ENSG00000135241 | 8.631273684 | 8.5924114   | protein_coding   | 7  | 108110866 | 108210110 | PNPLA8   |
| ENSG00000135245 | 7.246540262 | 7.192052139 | protein_coding   | 7  | 128095903 | 128098472 | HILPDA   |
| ENSG00000135248 | 1.16343121  | 0.950786998 | protein_coding   | 7  | 128349115 | 128371677 | FAM71F1  |
| ENSG00000135249 | 7.813830732 | 7.714077892 | protein_coding   | 7  | 105172532 | 105208124 | RINT1    |
| ENSG00000135250 | 9.165522239 | 9.049765501 | protein_coding   | 7  | 104751151 | 105039755 | SRPK2    |
| ENSG00000135253 | 2.762599152 | 1.16600992  | processed_transc | 7  | 128502505 | 128550773 | KCP      |
| ENSG00000135269 | 10.61757819 | 9.800811083 | protein_coding   | 7  | 115850547 | 115898837 | TES      |
| ENSG00000135272 | 7.062518763 | 7.161039629 | protein_coding   | 7  | 114562209 | 114659256 | MDFIC    |
| ENSG00000135297 | 7.64536895  | 7.709798264 | protein_coding   | 6  | 74171301  | 74218959  | MTO1     |
| ENSG00000135299 | 3.652182994 | 4.622587519 | protein_coding   | 6  | 90142889  | 90343553  | ANKRD6   |
| ENSG00000135314 | 5.301468762 | 5.545764946 | protein_coding   | 6  | 73951037  | 74020088  | KHDC1    |
| ENSG00000135315 | 6.313367288 | 6.668971382 | protein_coding   | 6  | 84833960  | 84937353  | KIAA1009 |
| ENSG00000135316 | 11.13316588 | 10.94791747 | protein_coding   | 6  | 86267696  | 86353510  | SYNCRIP  |
| ENSG00000135317 | 8.701704574 | 8.908465794 | protein_coding   | 6  | 86215214  | 86303874  | SNX14    |
| ENSG00000135318 | 8.936437694 | 8.385283657 | protein_coding   | 6  | 86159302  | 86205500  | NT5E     |
| ENSG00000135324 | 0.499066092 | 0.390640832 | protein_coding   | 6  | 84743475  | 84800600  | MRAP2    |

|                 |             |             |                |    |           |                   |
|-----------------|-------------|-------------|----------------|----|-----------|-------------------|
| ENSG00000135334 | 8.5900911   | 8.407915348 | protein_coding | 6  | 88384790  | 88411927 AKIRIN2  |
| ENSG00000135336 | 8.081530559 | 8.341695034 | protein_coding | 6  | 88299839  | 88377169 ORC3     |
| ENSG00000135338 | 4.923348194 | 4.932754837 | protein_coding | 6  | 80194708  | 80247175 LCA5     |
| ENSG00000135341 | 8.935220147 | 9.236874606 | protein_coding | 6  | 91223292  | 91296786 MAP3K7   |
| ENSG00000135346 | 0           | 0.950786998 | protein_coding | 6  | 87795216  | 87804824 CGA      |
| ENSG00000135362 | 6.861834435 | 6.99159092  | protein_coding | 11 | 36317838  | 36486754 PRR5L    |
| ENSG00000135363 | 2.847891871 | 2.579085888 | protein_coding | 11 | 33880122  | 33913836 LMO2     |
| ENSG00000135365 | 9.092036341 | 9.496159541 | protein_coding | 11 | 45950871  | 46142985 PHF21A   |
| ENSG00000135372 | 10.56973371 | 10.48830548 | protein_coding | 11 | 34127149  | 34169217 NAT10    |
| ENSG00000135373 | 7.434062125 | 3.133298822 | protein_coding | 11 | 34642640  | 34682604 EHF      |
| ENSG00000135374 | 0.869158192 | 0           | protein_coding | 11 | 34500340  | 34535352 ELF5     |
| ENSG00000135378 | 6.482942724 | 5.776071827 | protein_coding | 11 | 32851489  | 32879669 PRRG4    |
| ENSG00000135387 | 11.76630206 | 11.76340464 | protein_coding | 11 | 34073230  | 34122703 CAPRIN1  |
| ENSG00000135390 | 10.66425427 | 11.21275951 | protein_coding | 12 | 54026510  | 54071192 ATP5G2   |
| ENSG00000135392 | 7.983632192 | 7.902117654 | protein_coding | 12 | 56214744  | 56224608 DNAJC14  |
| ENSG00000135404 | 11.20942892 | 11.84323163 | protein_coding | 12 | 56119107  | 56123491 CD63     |
| ENSG00000135406 | 2.35979773  | 2.912743273 | protein_coding | 12 | 49687035  | 49692465 PRPH     |
| ENSG00000135407 | 5.763291843 | 5.726093467 | protein_coding | 12 | 58191159  | 58212487 AVIL     |
| ENSG00000135409 | 0           | 0.390640832 | protein_coding | 12 | 53817639  | 53825318 AMHR2    |
| ENSG00000135414 | 7.706593329 | 7.436965343 | protein_coding | 12 | 56137064  | 56150911 GDF11    |
| ENSG00000135423 | 5.498982484 | 4.676215056 | protein_coding | 12 | 56864736  | 56882198 GLS2     |
| ENSG00000135424 | 4.026095388 | 4.363974406 | protein_coding | 12 | 56078352  | 56109827 ITGA7    |
| ENSG00000135436 | 3.989024711 | 3.96493948  | protein_coding | 12 | 49976668  | 49999422 FAM186B  |
| ENSG00000135437 | 2.671945279 | 3.081239798 | protein_coding | 12 | 56114151  | 56118489 RDH5     |
| ENSG00000135439 | 2.471521042 | 1.802319292 | protein_coding | 12 | 58118981  | 58135940 AGAP2    |
| ENSG00000135441 | 5.316509574 | 6.376734172 | protein_coding | 12 | 56109820  | 56113871 BLOC1S1  |
| ENSG00000135443 | 0.499066092 | 0.390640832 | protein_coding | 12 | 52753790  | 52761265 KRT85    |
| ENSG00000135446 | 10.2558666  | 10.57409153 | protein_coding | 12 | 58142034  | 58149796 CDK4     |
| ENSG00000135451 | 9.287898339 | 9.55995988  | protein_coding | 12 | 49717019  | 49725514 TROAP    |
| ENSG00000135452 | 7.609180529 | 7.397596322 | protein_coding | 12 | 58131796  | 58143994 TSPAN31  |
| ENSG00000135454 | 8.66103884  | 8.351343215 | protein_coding | 12 | 58017193  | 58027138 B4GALNT1 |
| ENSG00000135457 | 9.31342641  | 8.953504395 | protein_coding | 12 | 51487446  | 51566926 TFCP2    |
| ENSG00000135469 | 5.977159882 | 6.881748114 | protein_coding | 12 | 56660642  | 56664750 COQ10A   |
| ENSG00000135472 | 0.499066092 | 0.390640832 | protein_coding | 12 | 50260679  | 50298000 FAIM2    |
| ENSG00000135473 | 9.332049062 | 9.852196378 | protein_coding | 12 | 56710007  | 56727837 PAN2     |
| ENSG00000135476 | 9.887281568 | 9.952048633 | protein_coding | 12 | 53662083  | 53687427 ESPL1    |
| ENSG00000135477 | 5.774228067 | 4.274079748 | pseudogene     | 12 | 52644250  | 52652651 KRT121P  |
| ENSG00000135480 | 12.78412844 | 12.61959647 | protein_coding | 12 | 52626304  | 52662180 KRT7     |
| ENSG00000135482 | 5.346128795 | 5.893930351 | protein_coding | 12 | 56511943  | 56516278 ZC3H10   |
| ENSG00000135486 | 10.68033139 | 10.89353271 | protein_coding | 12 | 54673977  | 54680872 HNRNPA1  |
| ENSG00000135502 | 3.146112541 | 3.813624741 | protein_coding | 12 | 58013310  | 58019934 SLC26A10 |
| ENSG00000135503 | 8.544507981 | 8.358195482 | protein_coding | 12 | 52345451  | 52390862 ACVR1B   |
| ENSG00000135506 | 10.84238558 | 11.32875696 | protein_coding | 12 | 58087738  | 58115340 OS9      |
| ENSG00000135517 | 0           | 0.697730409 | protein_coding | 12 | 56843286  | 56862950 MIP      |
| ENSG00000135519 | 3.004694206 | 3.081239798 | protein_coding | 12 | 49932940  | 49952077 KCNH3    |
| ENSG00000135521 | 8.05038018  | 8.234057939 | protein_coding | 6  | 144164481 | 144184949 LTV1    |
| ENSG00000135525 | 6.62865285  | 2.788380093 | protein_coding | 6  | 136663875 | 136871792 MAP7    |
| ENSG00000135535 | 10.86781572 | 11.08516875 | protein_coding | 6  | 109687717 | 109703762 CD164   |
| ENSG00000135537 | 5.550781289 | 6.142791909 | protein_coding | 6  | 108616098 | 108847999 LACE1   |
| ENSG00000135540 | 7.153278907 | 6.398170093 | protein_coding | 6  | 138743180 | 139013708 NHSL1   |
| ENSG00000135541 | 7.144876945 | 7.666288907 | protein_coding | 6  | 135604670 | 135830219 AH11    |
| ENSG00000135547 | 1.16343121  | 1.16600992  | protein_coding | 6  | 126068810 | 126082415 HEY2    |
| ENSG00000135549 | 3.004694206 | 2.851901313 | protein_coding | 6  | 122793062 | 123047518 PKIB    |
| ENSG00000135577 | 0.499066092 | 0.950786998 | protein_coding | 6  | 142379467 | 142409936 NMBR    |
| ENSG00000135587 | 6.877132514 | 6.799557986 | protein_coding | 6  | 109761966 | 109765122 SMPD2   |
| ENSG00000135596 | 8.435062447 | 8.696649474 | protein_coding | 6  | 109765265 | 109787171 MICAL1  |
| ENSG00000135597 | 8.78516728  | 8.331981894 | protein_coding | 6  | 139224630 | 139309398 REPS1   |
| ENSG00000135604 | 5.525114348 | 6.445267191 | protein_coding | 6  | 144471663 | 144509507 STX11   |
| ENSG00000135605 | 5.795854912 | 6.198834244 | protein_coding | 4  | 48137800  | 48271881 TEC      |
| ENSG00000135617 | 6.489593565 | 7.18590274  | protein_coding | 2  | 73455134  | 73460366 PRADC1   |
| ENSG00000135622 | 7.093410923 | 7.568048738 | protein_coding | 2  | 74881355  | 74909186 SEMA4F   |
| ENSG00000135624 | 11.43421439 | 11.68108834 | protein_coding | 2  | 73460548  | 73480149 CCT7     |
| ENSG00000135625 | 3.077135474 | 0.697730409 | protein_coding | 2  | 73518058  | 73520833 EGR4     |

|                 |             |             |                |    |           |           |           |
|-----------------|-------------|-------------|----------------|----|-----------|-----------|-----------|
| ENSG00000135631 | 9.072234198 | 9.138412238 | protein_coding | 2  | 73300510  | 73383849  | RAB11FIP5 |
| ENSG00000135632 | 9.189208632 | 8.825850709 | protein_coding | 2  | 73441350  | 73454365  | SMYD5     |
| ENSG00000135636 | 9.045401313 | 8.914056863 | protein_coding | 2  | 71680852  | 71913898  | DYSF      |
| ENSG00000135637 | 6.305850085 | 6.16171561  | protein_coding | 2  | 74699113  | 74710535  | CCDC142   |
| ENSG00000135638 | 1.799000381 | 1.667587519 | protein_coding | 2  | 73143176  | 73162020  | EMX1      |
| ENSG00000135643 | 5.83815965  | 4.101879561 | protein_coding | 12 | 70760056  | 70828072  | KCNMB4    |
| ENSG00000135655 | 9.291708897 | 9.484933332 | protein_coding | 12 | 62654119  | 62811211  | USP15     |
| ENSG00000135677 | 10.38454676 | 10.87501876 | protein_coding | 12 | 65107225  | 65153227  | GNS       |
| ENSG00000135678 | 7.186405829 | 5.496926774 | protein_coding | 12 | 69235977  | 69365350  | CPM       |
| ENSG00000135679 | 8.721615518 | 8.531880603 | protein_coding | 12 | 69201956  | 69239214  | MDM2      |
| ENSG00000135686 | 9.309672858 | 8.825850709 | protein_coding | 16 | 84682131  | 84701292  | KLHL36    |
| ENSG00000135697 | 0.499066092 | 0.390640832 | protein_coding | 16 | 81272053  | 81324747  | BCMO1     |
| ENSG00000135698 | 7.952677993 | 8.053329862 | protein_coding | 16 | 82181403  | 82203831  | MPHOSPH6  |
| ENSG00000135702 | 2.671945279 | 2.721932731 | protein_coding | 16 | 75562433  | 75569145  | CHST5     |
| ENSG00000135709 | 7.609180529 | 7.122922611 | protein_coding | 16 | 85061375  | 85127836  | KIAA0513  |
| ENSG00000135720 | 10.12689227 | 10.46310061 | protein_coding | 16 | 66754796  | 66785701  | DYNC11L2  |
| ENSG00000135722 | 5.741167503 | 5.9163892   | protein_coding | 16 | 67193834  | 67199718  | FBXL8     |
| ENSG00000135723 | 9.92641136  | 9.729672494 | protein_coding | 16 | 67263290  | 67281561  | FHOD1     |
| ENSG00000135736 | 6.830742851 | 7.632773539 | protein_coding | 16 | 57546090  | 57570511  | CCDC102A  |
| ENSG00000135740 | 6.407685389 | 6.510691757 | protein_coding | 16 | 67271586  | 67306093  | SLC9A5    |
| ENSG00000135744 | 3.989024711 | 5.47691899  | protein_coding | 1  | 230838269 | 230850043 | AGT       |
| ENSG00000135747 | 5.909333162 | 6.252780742 | protein_coding | 1  | 247108849 | 247242113 | ZNF670    |
| ENSG00000135749 | 8.251597515 | 8.616616024 | protein_coding | 1  | 233119881 | 233431459 | PCNXL2    |
| ENSG00000135750 | 0.499066092 | 0           | protein_coding | 1  | 233749750 | 233808258 | KCNK1     |
| ENSG00000135763 | 8.903197794 | 8.78167951  | protein_coding | 1  | 229761981 | 229795946 | URB2      |
| ENSG00000135766 | 9.59285838  | 9.987393954 | protein_coding | 1  | 231499497 | 231560790 | EGLN1     |
| ENSG00000135773 | 0.869158192 | 0.697730409 | protein_coding | 1  | 230883130 | 230937749 | CAPN9     |
| ENSG00000135775 | 8.344411036 | 8.410554709 | protein_coding | 1  | 230778235 | 230829728 | COG2      |
| ENSG00000135776 | 8.18144485  | 8.581912372 | protein_coding | 1  | 229652329 | 229694442 | ABCB10    |
| ENSG00000135778 | 8.484177644 | 8.702045897 | protein_coding | 1  | 233086351 | 233114548 | NTPCR     |
| ENSG00000135801 | 8.510576602 | 8.511125832 | protein_coding | 1  | 229728858 | 229761794 | TAF5L     |
| ENSG00000135821 | 8.455589162 | 8.013952351 | protein_coding | 1  | 182350839 | 182361341 | GLUL      |
| ENSG00000135823 | 8.223944437 | 8.133800013 | protein_coding | 1  | 180941861 | 180992047 | STX6      |
| ENSG00000135828 | 5.191549282 | 5.57429348  | protein_coding | 1  | 182542769 | 182558391 | RNASEL    |
| ENSG00000135829 | 11.41403475 | 11.59567532 | protein_coding | 1  | 182808439 | 182856886 | DHX9      |
| ENSG00000135835 | 4.464551814 | 4.17820932  | protein_coding | 1  | 180882290 | 180920750 | KIAA1614  |
| ENSG00000135837 | 8.3352092   | 8.779639234 | protein_coding | 1  | 179923873 | 180084015 | CEP350    |
| ENSG00000135838 | 2.928422289 | 4.903073497 | protein_coding | 1  | 182758428 | 182799519 | NPL       |
| ENSG00000135842 | 9.019209518 | 9.197681135 | protein_coding | 1  | 184759858 | 184943682 | FAM129A   |
| ENSG00000135845 | 7.289098491 | 7.728957399 | protein_coding | 1  | 172339329 | 172413230 | PIGC      |
| ENSG00000135847 | 8.027710784 | 8.058387721 | protein_coding | 1  | 180244515 | 180472089 | ACBD6     |
| ENSG00000135862 | 11.77193965 | 11.85841456 | protein_coding | 1  | 182992597 | 183114727 | LAMC1     |
| ENSG00000135870 | 8.164919416 | 8.159132889 | protein_coding | 1  | 173900352 | 173991435 | RC3H1     |
| ENSG00000135898 | 0           | 0.697730409 | protein_coding | 2  | 231772033 | 231825781 | GPR55     |
| ENSG00000135899 | 7.821758815 | 8.101495266 | protein_coding | 2  | 231032009 | 231090444 | SP110     |
| ENSG00000135900 | 8.223944437 | 7.955508102 | protein_coding | 2  | 224822121 | 224832431 | MRPL44    |
| ENSG00000135902 | 2.847891871 | 2.144285137 | protein_coding | 2  | 233390703 | 233401377 | CHRNA2    |
| ENSG00000135905 | 8.105542576 | 8.260632671 | protein_coding | 2  | 225629807 | 225907162 | DOCK10    |
| ENSG00000135912 | 9.237422823 | 8.962525691 | protein_coding | 2  | 219575568 | 219620139 | TTL4      |
| ENSG00000135913 | 7.326727684 | 6.787424764 | protein_coding | 2  | 219314974 | 219433084 | USP37     |
| ENSG00000135914 | 0.869158192 | 0.697730409 | protein_coding | 2  | 231972944 | 231989832 | HTR2B     |
| ENSG00000135916 | 9.861233924 | 9.788181112 | protein_coding | 2  | 231729354 | 231743963 | ITM2C     |
| ENSG00000135917 | 5.538004898 | 4.94736961  | protein_coding | 2  | 228549926 | 228582728 | SLC19A3   |
| ENSG00000135919 | 0.499066092 | 0.950786998 | protein_coding | 2  | 224839829 | 224904036 | SERPINE2  |
| ENSG00000135924 | 8.750975986 | 9.01636662  | protein_coding | 2  | 220143989 | 220151622 | DNAJB2    |
| ENSG00000135925 | 5.91922012  | 6.495854971 | protein_coding | 2  | 219745085 | 219764303 | WNT10A    |
| ENSG00000135926 | 10.67996799 | 10.37834106 | protein_coding | 2  | 219138915 | 219157309 | TMBIM1    |
| ENSG00000135929 | 5.806547963 | 5.824376633 | protein_coding | 2  | 219646472 | 219680016 | CYP27A1   |
| ENSG00000135930 | 9.644431499 | 9.365548888 | protein_coding | 2  | 233414762 | 233448354 | EIF4E2    |
| ENSG00000135931 | 8.059349131 | 8.044860491 | protein_coding | 2  | 232063260 | 232239548 | ARMC9     |
| ENSG00000135932 | 10.6991035  | 10.13633465 | protein_coding | 2  | 231577560 | 231685790 | CAB39     |
| ENSG00000135940 | 9.645920794 | 9.769283465 | protein_coding | 2  | 98262503  | 98264846  | COX5B     |
| ENSG00000135945 | 8.322227223 | 7.991210667 | protein_coding | 2  | 100016938 | 100106497 | REV1      |



|                 |             |             |                |    |           |           |           |
|-----------------|-------------|-------------|----------------|----|-----------|-----------|-----------|
| ENSG00000135951 | 4.062237333 | 3.714580548 | protein_coding | 2  | 99613724  | 99771427  | TSGA10    |
| ENSG00000135953 | 7.132181536 | 6.495854971 | protein_coding | 2  | 103332299 | 103353347 | MFS09     |
| ENSG00000135956 | 9.633963159 | 8.866788836 | protein_coding | 2  | 96916312  | 96931732  | TMEM127   |
| ENSG00000135960 | 0.869158192 | 0           | protein_coding | 2  | 109510927 | 109605828 | EDAR      |
| ENSG00000135966 | 8.507303029 | 7.996490656 | protein_coding | 2  | 105880871 | 105946491 | TGFBRAP1  |
| ENSG00000135968 | 8.265227794 | 8.124184315 | protein_coding | 2  | 109065017 | 109125871 | GCC2      |
| ENSG00000135972 | 8.249639777 | 8.012215662 | protein_coding | 2  | 105654441 | 105716418 | MRPS9     |
| ENSG00000135973 | 0           | 1.518964905 | protein_coding | 2  | 105858200 | 105859924 | GPR45     |
| ENSG00000135974 | 7.461385447 | 7.198175438 | protein_coding | 2  | 105953816 | 105965668 | C2orf49   |
| ENSG00000135976 | 5.958104008 | 5.840125386 | protein_coding | 2  | 97779233  | 97930258  | ANKRD36   |
| ENSG00000135999 | 7.262161623 | 7.295628905 | protein_coding | 2  | 149402009 | 149545130 | EPC2      |
| ENSG00000136002 | 8.209916558 | 6.505763096 | protein_coding | 2  | 131594489 | 131804836 | ARHGEF4   |
| ENSG00000136003 | 8.774313977 | 9.267771518 | protein_coding | 12 | 108956358 | 108963160 | ISCU      |
| ENSG00000136010 | 8.586993258 | 8.98128876  | protein_coding | 12 | 105413568 | 105478355 | ALDH1L2   |
| ENSG00000136011 | 1.960915222 | 2.039052734 | protein_coding | 12 | 103981051 | 104160505 | STAB2     |
| ENSG00000136014 | 0.499066092 | 0.697730409 | protein_coding | 12 | 95910336  | 95945266  | USP44     |
| ENSG00000136021 | 9.001868107 | 8.955313173 | protein_coding | 12 | 100660918 | 100735502 | SCYL2     |
| ENSG00000136026 | 11.25600812 | 11.43660358 | protein_coding | 12 | 106631655 | 106698057 | CKAP4     |
| ENSG00000136040 | 4.517578978 | 4.794098771 | protein_coding | 12 | 94542499  | 94701451  | PLXNC1    |
| ENSG00000136044 | 7.50471092  | 7.733180651 | protein_coding | 12 | 105567074 | 105630016 | APPL2     |
| ENSG00000136045 | 9.44329146  | 9.53356709  | protein_coding | 12 | 108079509 | 108106944 | PWP1      |
| ENSG00000136048 | 8.231899551 | 8.565427152 | protein_coding | 12 | 102271129 | 102405908 | DRAM1     |
| ENSG00000136051 | 8.879339004 | 9.10783897  | protein_coding | 12 | 105501102 | 105562912 | KIAA1033  |
| ENSG00000136052 | 8.235860718 | 8.44700755  | protein_coding | 12 | 105196331 | 105352522 | SLC41A2   |
| ENSG00000136059 | 4.261916566 | 4.101879561 | protein_coding | 3  | 38029550  | 38048679  | VILL      |
| ENSG00000136068 | 13.12449481 | 12.82527993 | protein_coding | 3  | 57994127  | 58157982  | FLNB      |
| ENSG00000136098 | 5.550781289 | 4.693656882 | protein_coding | 13 | 52706775  | 52733996  | NEK3      |
| ENSG00000136100 | 7.273767634 | 7.258020107 | protein_coding | 13 | 52986839  | 53024763  | VPS36     |
| ENSG00000136104 | 6.998676229 | 6.712401119 | protein_coding | 13 | 51483814  | 51544592  | RNASEH2B  |
| ENSG00000136108 | 9.043142548 | 8.735060572 | protein_coding | 13 | 53029495  | 53050485  | CKAP2     |
| ENSG00000136110 | 0.499066092 | 0           | protein_coding | 13 | 53277399  | 53313947  | LECT1     |
| ENSG00000136111 | 9.421718623 | 8.508664347 | protein_coding | 13 | 75858808  | 76056250  | TBC1D4    |
| ENSG00000136114 | 3.871730003 | 3.411459265 | protein_coding | 13 | 52951305  | 52980629  | THSD1     |
| ENSG00000136122 | 6.738827102 | 6.310446475 | protein_coding | 13 | 73302061  | 73330318  | BORA      |
| ENSG00000136141 | 6.970425921 | 6.434933235 | protein_coding | 13 | 47127303  | 47325710  | LRCH1     |
| ENSG00000136143 | 8.032273249 | 7.524852175 | protein_coding | 13 | 48510622  | 48612125  | SUCLA2    |
| ENSG00000136144 | 7.50471092  | 6.866449614 | protein_coding | 13 | 50106082  | 50159719  | RCBTB1    |
| ENSG00000136146 | 6.877132514 | 6.460630645 | protein_coding | 13 | 48627459  | 48669267  | MED4      |
| ENSG00000136147 | 6.897280837 | 6.95589788  | protein_coding | 13 | 50069746  | 50103123  | PHF11     |
| ENSG00000136149 | 1.407729925 | 2.039052734 | pseudogene     | 13 | 55014839  | 55015450  | RPL13AP25 |
| ENSG00000136152 | 7.590740122 | 6.881748114 | protein_coding | 13 | 46039060  | 46110765  | COG3      |
| ENSG00000136153 | 7.136425764 | 5.908941696 | protein_coding | 13 | 76194570  | 76434004  | LMO7      |
| ENSG00000136155 | 6.469548347 | 0           | protein_coding | 13 | 78109809  | 78219398  | SCEL      |
| ENSG00000136156 | 9.622662143 | 9.432007055 | protein_coding | 13 | 48807294  | 48837063  | ITM2B     |
| ENSG00000136158 | 7.878603882 | 7.423961341 | protein_coding | 13 | 80910111  | 80915086  | SPRY2     |
| ENSG00000136159 | 7.140657543 | 6.577981353 | protein_coding | 13 | 48611703  | 48621282  | NUDT15    |
| ENSG00000136161 | 4.261916566 | 4.932754837 | protein_coding | 13 | 49063095  | 49109872  | RCBTB2    |
| ENSG00000136167 | 7.444369108 | 8.440565301 | protein_coding | 13 | 46700061  | 46786006  | LCP1      |
| ENSG00000136169 | 6.146643566 | 5.611474642 | protein_coding | 13 | 50018429  | 50069138  | SETDB2    |
| ENSG00000136193 | 11.30467048 | 11.04305224 | protein_coding | 7  | 29959719  | 30029905  | SCRN1     |
| ENSG00000136197 | 1.16343121  | 1.353254395 | protein_coding | 7  | 42948872  | 42951904  | C7orf25   |
| ENSG00000136205 | 11.32107712 | 10.56907983 | protein_coding | 7  | 47314752  | 47622156  | TNS3      |
| ENSG00000136206 | 2.471521042 | 2.334191469 | protein_coding | 7  | 44040488  | 44049721  | SPDYE1    |
| ENSG00000136213 | 7.624369505 | 7.65742733  | protein_coding | 7  | 2443223   | 2474242   | CHST12    |
| ENSG00000136231 | 8.723027268 | 8.027771115 | protein_coding | 7  | 23349828  | 23510086  | IGF2BP3   |
| ENSG00000136235 | 2.57521082  | 4.622587519 | protein_coding | 7  | 23275586  | 23314727  | GPNMB     |
| ENSG00000136237 | 5.785082014 | 2.039052734 | protein_coding | 7  | 22157909  | 22396763  | RAPGEF5   |
| ENSG00000136238 | 11.81345084 | 11.25412478 | protein_coding | 7  | 6414154   | 6443608   | RAC1      |
| ENSG00000136240 | 11.77211014 | 11.32000931 | protein_coding | 7  | 6485584   | 6523873   | KDEL2     |
| ENSG00000136243 | 8.508940744 | 8.507432028 | protein_coding | 7  | 23221446  | 23240630  | NUPL2     |
| ENSG00000136244 | 11.27682442 | 9.513450729 | protein_coding | 7  | 22765503  | 22771621  | IL6       |
| ENSG00000136247 | 8.721615518 | 8.739266022 | protein_coding | 7  | 6617065   | 6629005   | ZDHH4     |
| ENSG00000136250 | 7.214780754 | 6.89311646  | protein_coding | 7  | 36552456  | 36764154  | AOAH      |

|                 |             |             |                  |    |           |           |          |
|-----------------|-------------|-------------|------------------|----|-----------|-----------|----------|
| ENSG00000136261 | 10.89718911 | 10.43971049 | protein_coding   | 7  | 16685756  | 16746148  | BZW2     |
| ENSG00000136270 | 10.80087503 | 10.66200066 | protein_coding   | 7  | 45139699  | 45151646  | TBRG4    |
| ENSG00000136271 | 10.45505461 | 10.2490122  | protein_coding   | 7  | 44605016  | 44614650  | DDX56    |
| ENSG00000136273 | 7.624369505 | 7.41347308  | protein_coding   | 7  | 47735328  | 48019178  | HUS1     |
| ENSG00000136274 | 3.146112541 | 1.925536307 | protein_coding   | 7  | 45120037  | 45128513  | NACAD    |
| ENSG00000136275 | 0.869158192 |             | 0 protein_coding | 7  | 47834889  | 47859428  | C7orf69  |
| ENSG00000136279 | 10.63792779 | 10.5837707  | protein_coding   | 7  | 44084232  | 44109055  | DBNL     |
| ENSG00000136280 | 9.602094519 | 9.22117442  | protein_coding   | 7  | 45039074  | 45116068  | CCM2     |
| ENSG00000136286 | 2.671945279 | 2.144285137 | protein_coding   | 7  | 45002261  | 45018697  | MYO1G    |
| ENSG00000136295 | 12.02595418 | 12.07675852 | protein_coding   | 7  | 2671585   | 2704436   | TTYH3    |
| ENSG00000136315 | 0.499066092 |             | 0 lincRNA        | 14 | 21387500  | 21388458  |          |
| ENSG00000136319 | 6.502803968 | 6.815578497 | protein_coding   | 14 | 20754387  | 20774153  | TTC5     |
| ENSG00000136327 | 4.409500985 | 3.96493948  | protein_coding   | 14 | 37049216  | 37051812  | NKX2-8   |
| ENSG00000136352 | 4.903563137 | 3.453019579 | protein_coding   | 14 | 36985602  | 36990354  | NKX2-1   |
| ENSG00000136367 | 5.613019223 | 6.803579823 | protein_coding   | 14 | 23990069  | 24025401  | ZFHX2    |
| ENSG00000136371 | 4.292665995 | 4.508954154 | protein_coding   | 15 | 80125927  | 80189721  | MTHFS    |
| ENSG00000136378 | 4.097495944 | 4.826083323 | protein_coding   | 15 | 79051545  | 79103805  | ADAMTS7  |
| ENSG00000136379 | 8.094677541 | 7.619146302 | protein_coding   | 15 | 80972025  | 81047962  | FAM108C1 |
| ENSG00000136381 | 9.154055005 | 9.138412238 | protein_coding   | 15 | 78729773  | 78793798  | IREB2    |
| ENSG00000136383 | 5.763291843 | 5.112089758 | protein_coding   | 15 | 85359911  | 85416713  | ALPK3    |
| ENSG00000136404 | 3.78787645  | 3.279072565 | protein_coding   | 15 | 83776159  | 83813606  | TM6SF1   |
| ENSG00000136425 | 3.146112541 | 2.501982735 | protein_coding   | 15 | 78396948  | 78423886  | CIB2     |
| ENSG00000136436 | 9.458626558 | 9.23613084  | protein_coding   | 17 | 46908350  | 46943884  | CALCOCO2 |
| ENSG00000136444 | 8.179389493 | 8.530667964 | protein_coding   | 17 | 48556161  | 48563336  | RSAD1    |
| ENSG00000136448 | 10.60461664 | 10.34147131 | protein_coding   | 17 | 43138680  | 43186377  | NMT1     |
| ENSG00000136449 | 2.471521042 | 1.16600992  | protein_coding   | 17 | 48585745  | 48608862  | MYCBPAP  |
| ENSG00000136450 | 11.56355738 | 11.74456975 | protein_coding   | 17 | 56078284  | 56084707  | SRSF1    |
| ENSG00000136451 | 9.669542781 | 9.763100953 | protein_coding   | 17 | 56048910  | 56065615  | VEZF1    |
| ENSG00000136457 | 2.671945279 | 1.925536307 | protein_coding   | 17 | 48541857  | 48546327  | CHAD     |
| ENSG00000136463 | 8.597806729 | 8.886830358 | protein_coding   | 17 | 61678231  | 61685724  | TACO1    |
| ENSG00000136478 | 9.016909338 | 9.742822827 | protein_coding   | 17 | 62224796  | 62340653  | TEX2     |
| ENSG00000136485 | 10.69443332 | 10.730936   | protein_coding   | 17 | 61627822  | 61671639  | DCAF7    |
| ENSG00000136490 | 6.616550626 | 5.98174124  | protein_coding   | 17 | 61773250  | 61777519  | LIMD2    |
| ENSG00000136492 | 7.913645586 | 8.800919568 | protein_coding   | 17 | 59759985  | 59940755  | BRIP1    |
| ENSG00000136504 | 8.646233023 | 8.487570409 | protein_coding   | 17 | 47865917  | 47906458  | KAT7     |
| ENSG00000136514 | 3.004694206 | 3.183544561 | protein_coding   | 3  | 187086120 | 187089864 | RTP4     |
| ENSG00000136518 | 9.721319186 | 9.705158168 | protein_coding   | 3  | 179280668 | 179306196 | ACTL6A   |
| ENSG00000136521 | 8.465744027 | 8.571336379 | protein_coding   | 3  | 179322478 | 179345435 | NDUFB5   |
| ENSG00000136522 | 8.435062447 | 8.678149164 | protein_coding   | 3  | 179306073 | 179322442 | MRPL47   |
| ENSG00000136527 | 10.89186426 | 10.76356151 | protein_coding   | 3  | 185633694 | 185655924 | TRA2B    |
| ENSG00000136531 | 0.499066092 |             | 0 protein_coding | 2  | 166095912 | 166248818 | SCN2A    |
| ENSG00000136536 | 9.11480047  | 8.899098923 | protein_coding   | 2  | 160569000 | 160625359 | 7-Mar    |
| ENSG00000136542 | 5.827699195 | 2.501982735 | protein_coding   | 2  | 158114110 | 158170723 | GALNT5   |
| ENSG00000136560 | 7.824391858 | 8.076782959 | protein_coding   | 2  | 161993419 | 162092732 | TANK     |
| ENSG00000136573 | 1.407729925 | 0.390640832 | protein_coding   | 8  | 11351510  | 11422113  | BLK      |
| ENSG00000136603 | 8.576098123 | 8.382597612 | protein_coding   | 3  | 170075466 | 170114623 | SKIL     |
| ENSG00000136628 | 11.87602149 | 12.15577074 | protein_coding   | 1  | 220141943 | 220220000 | EPRS     |
| ENSG00000136630 | 4.292665995 | 4.566889334 | protein_coding   | 1  | 221051699 | 221059124 | HLX      |
| ENSG00000136631 | 8.658089807 | 9.010289238 | protein_coding   | 1  | 150039369 | 150117505 | VPS45    |
| ENSG00000136636 | 10.02584819 | 10.03478213 | protein_coding   | 1  | 215740735 | 215795073 | KCTD3    |
| ENSG00000136643 | 8.495786671 | 8.625731057 | protein_coding   | 1  | 213224589 | 213448116 | RPS6KC1  |
| ENSG00000136653 | 6.646617938 | 5.784235782 | protein_coding   | 1  | 206680879 | 206762616 | RASSF5   |
| ENSG00000136682 | 5.649112675 | 5.840125386 | protein_coding   | 2  | 114195268 | 114253766 | CBWD2    |
| ENSG00000136688 | 0.499066092 | 0.950786998 | protein_coding   | 2  | 113730780 | 113743220 | IL36G    |
| ENSG00000136689 | 2.10647801  | 2.501982735 | protein_coding   | 2  | 113864791 | 113891593 | IL1RN    |
| ENSG00000136695 | 0.499066092 |             | 0 protein_coding | 2  | 113816215 | 113822325 | IL36RN   |
| ENSG00000136696 | 1.407729925 | 2.334191469 | protein_coding   | 2  | 113779668 | 113810444 | IL36B    |
| ENSG00000136699 | 10.35753275 | 10.08645176 | protein_coding   | 2  | 130908981 | 130940323 | SMPD4    |
| ENSG00000136709 | 10.02011733 | 9.622766057 | protein_coding   | 2  | 128458596 | 128568761 | WDR33    |
| ENSG00000136710 | 7.304268146 | 7.295628905 | protein_coding   | 2  | 131095814 | 131099922 | CCDC115  |
| ENSG00000136715 | 9.520012288 | 8.990138507 | protein_coding   | 2  | 128698791 | 128785694 | SAP130   |
| ENSG00000136717 | 8.970118399 | 8.452140716 | protein_coding   | 2  | 127805603 | 127864931 | BIN1     |
| ENSG00000136718 | 10.37245301 | 10.00452874 | protein_coding   | 2  | 131099798 | 131105383 | IMP4     |

|                 |             |             |                |    |           |           |            |
|-----------------|-------------|-------------|----------------|----|-----------|-----------|------------|
| ENSG00000136720 | 8.871721931 | 8.426290271 | protein_coding | 2  | 128994290 | 129076151 | HS6ST1     |
| ENSG00000136731 | 10.67596446 | 10.33523369 | protein_coding | 2  | 128848774 | 128953251 | UGGT1      |
| ENSG00000136732 | 1.407729925 | 0           | protein_coding | 2  | 127413509 | 127454246 | GYPC       |
| ENSG00000136738 | 9.003030709 | 8.958022094 | protein_coding | 10 | 17686124  | 17757913  | STAM       |
| ENSG00000136754 | 9.10941293  | 9.802319276 | protein_coding | 10 | 27035522  | 27150016  | ABI1       |
| ENSG00000136758 | 10.94636528 | 11.66942788 | protein_coding | 10 | 27399383  | 27444195  | YME1L1     |
| ENSG00000136770 | 8.484177644 | 8.866788836 | protein_coding | 10 | 22045466  | 22292698  | DNAJC1     |
| ENSG00000136783 | 6.640654398 | 7.258020107 | protein_coding | 9  | 107509969 | 107522403 | NIPSNAP3A  |
| ENSG00000136802 | 10.0287051  | 9.89711675  | protein_coding | 9  | 131644391 | 131680318 | LRRC8A     |
| ENSG00000136807 | 9.769253212 | 9.618206363 | protein_coding | 9  | 130547958 | 130553066 | CDK9       |
| ENSG00000136810 | 10.77456633 | 11.21219232 | protein_coding | 9  | 113006091 | 113018920 | TXN        |
| ENSG00000136811 | 9.990530519 | 9.892875904 | protein_coding | 9  | 131217466 | 131263239 | ODF2       |
| ENSG00000136813 | 10.92566986 | 11.05785962 | protein_coding | 9  | 114122972 | 114247025 | KIAA0368   |
| ENSG00000136816 | 8.886916071 | 8.931620308 | protein_coding | 9  | 132565432 | 132573560 | TOR1B      |
| ENSG00000136819 | 9.139327269 | 8.900977169 | protein_coding | 9  | 132589569 | 132598142 | C9orf78    |
| ENSG00000136824 | 10.09399102 | 10.25269422 | protein_coding | 9  | 106856541 | 106903698 | SMC2       |
| ENSG00000136826 | 9.498740691 | 8.327799018 | protein_coding | 9  | 110247133 | 110252763 | KLF4       |
| ENSG00000136827 | 8.772951555 | 9.032734472 | protein_coding | 9  | 132575222 | 132586413 | TOR1A      |
| ENSG00000136828 | 6.236372259 | 6.110690132 | protein_coding | 9  | 129677053 | 129985445 | RALGPS1    |
| ENSG00000136830 | 12.67274826 | 12.05941448 | protein_coding | 9  | 130267618 | 130341268 | FAM129B    |
| ENSG00000136840 | 9.955528053 | 9.492427169 | protein_coding | 9  | 130670114 | 130679317 | ST6GALNAC4 |
| ENSG00000136842 | 2.471521042 | 2.912743273 | protein_coding | 9  | 100263462 | 100364023 | TMOD1      |
| ENSG00000136848 | 9.64070152  | 9.37436355  | protein_coding | 9  | 124329336 | 124547809 | DAB2IP     |
| ENSG00000136854 | 9.006512903 | 8.663840043 | protein_coding | 9  | 130374540 | 130457460 | STXBP1     |
| ENSG00000136856 | 8.05038018  | 8.020878279 | protein_coding | 9  | 130159421 | 130170703 | SLC2A8     |
| ENSG00000136859 | 2.762599152 | 2.501982735 | protein_coding | 9  | 129849611 | 129885162 | ANGPTL2    |
| ENSG00000136861 | 9.475476535 | 9.474249985 | protein_coding | 9  | 123151147 | 123342448 | CDK5RAP2   |
| ENSG00000136866 | 6.146643566 | 5.9163892   | protein_coding | 9  | 115800660 | 115819039 | ZFP37      |
| ENSG00000136867 | 3.146112541 | 3.748356452 | protein_coding | 9  | 115913222 | 115926417 | SLC31A2    |
| ENSG00000136868 | 9.311550855 | 8.761145731 | protein_coding | 9  | 115983842 | 116029217 | SLC31A1    |
| ENSG00000136869 | 5.360713447 | 6.123616685 | protein_coding | 9  | 120466610 | 120479149 | TLR4       |
| ENSG00000136870 | 6.9512803   | 7.281279771 | protein_coding | 9  | 104161155 | 104172942 | ZNF189     |
| ENSG00000136874 | 7.402691859 | 7.309836726 | protein_coding | 9  | 102668915 | 102732618 | STX17      |
| ENSG00000136875 | 9.820929282 | 9.510993211 | protein_coding | 9  | 116037623 | 116055466 | PRPF4      |
| ENSG00000136877 | 10.17616765 | 9.700851959 | protein_coding | 9  | 130556876 | 130576606 | FPGS       |
| ENSG00000136878 | 8.962967004 | 8.96970233  | protein_coding | 9  | 132596977 | 132644107 | USP20      |
| ENSG00000136881 | 1.16343121  | 0.950786998 | protein_coding | 9  | 104122699 | 104145801 | BAAT       |
| ENSG00000136883 | 1.960915222 | 2.579085888 | protein_coding | 9  | 116848406 | 116861571 | KIF12      |
| ENSG00000136888 | 9.150911694 | 9.483053775 | protein_coding | 9  | 117350026 | 117360653 | ATP6V1G1   |
| ENSG00000136891 | 9.346776019 | 9.599822093 | protein_coding | 9  | 103064359 | 103115221 | TEX10      |
| ENSG00000136895 | 6.138202758 | 6.235021771 | protein_coding | 9  | 129986544 | 130155939 | GARNL3     |
| ENSG00000136897 | 8.301587982 | 8.344458247 | protein_coding | 9  | 104149915 | 104160896 | MRPL50     |
| ENSG00000136908 | 9.788933545 | 9.779018578 | protein_coding | 9  | 130697378 | 130700763 | DPM2       |
| ENSG00000136918 | 1.799000381 | 1.518964905 | protein_coding | 9  | 127615755 | 127620160 | WDR38      |
| ENSG00000136925 | 7.326727684 | 7.683850422 | protein_coding | 9  | 100362362 | 100395962 | TSTD2      |
| ENSG00000136928 | 0.499066092 | 0           | protein_coding | 9  | 101050391 | 101471479 | GABBR2     |
| ENSG00000136930 | 11.0713315  | 11.33380639 | protein_coding | 9  | 127115745 | 127177723 | PSMB7      |
| ENSG00000136931 | 0.869158192 | 0.697730409 | protein_coding | 9  | 127243516 | 127269709 | NR5A1      |
| ENSG00000136932 | 6.585843317 | 6.827478203 | protein_coding | 9  | 100666771 | 100684852 | C9orf156   |
| ENSG00000136933 | 8.565120083 | 8.563056668 | protein_coding | 9  | 127962821 | 127996437 | RABEPK     |
| ENSG00000136935 | 8.227927477 | 8.464894292 | protein_coding | 9  | 127640646 | 127710292 | GOLGA1     |
| ENSG00000136936 | 6.489593565 | 6.610484676 | protein_coding | 9  | 100437191 | 100459639 | XPA        |
| ENSG00000136937 | 9.984657349 | 10.02577254 | protein_coding | 9  | 100395908 | 100436030 | NCBP1      |
| ENSG00000136938 | 11.59338746 | 11.50981718 | protein_coding | 9  | 100745638 | 100778225 | ANP32B     |
| ENSG00000136939 | 0.499066092 | 0           | protein_coding | 9  | 125486269 | 125487204 | OR1L4      |
| ENSG00000136940 | 8.357195795 | 8.52337065  | protein_coding | 9  | 125560668 | 125590910 | PDCL       |
| ENSG00000136942 | 11.57650097 | 12.1284757  | protein_coding | 9  | 127620159 | 127624260 | RPL35      |
| ENSG00000136943 | 6.014532757 | 6.287656023 | protein_coding | 9  | 99794940  | 99801925  | CTSL2      |
| ENSG00000136944 | 1.616589159 | 1.518964905 | protein_coding | 9  | 129376722 | 129463311 | LMX1B      |
| ENSG00000136950 | 9.424324461 | 9.556984901 | protein_coding | 9  | 127624409 | 127640003 | ARPC5L     |
| ENSG00000136960 | 2.57521082  | 2.652276565 | protein_coding | 8  | 120569326 | 120685693 | ENPP2      |
| ENSG00000136982 | 7.2307479   | 7.495318771 | protein_coding | 8  | 120846216 | 120868250 | DSCC1      |
| ENSG00000136986 | 9.405104778 | 9.118371319 | protein_coding | 8  | 124025458 | 124054663 | DERL1      |

|                 |             |             |                |   |           |           |           |
|-----------------|-------------|-------------|----------------|---|-----------|-----------|-----------|
| ENSG00000136997 | 14.9449048  | 13.80212345 | protein_coding | 8 | 128747680 | 128753674 | MYC       |
| ENSG00000136999 | 5.827699195 | 7.532142019 | protein_coding | 8 | 120428546 | 120436593 | NOV       |
| ENSG00000137033 | 0.499066092 | 0.390640832 | protein_coding | 9 | 6215805   | 6257983   | IL33      |
| ENSG00000137038 | 6.693459083 | 7.57041104  | protein_coding | 9 | 7796490   | 7888380   | C9orf123  |
| ENSG00000137040 | 7.161632221 | 7.447284805 | protein_coding | 9 | 6011043   | 6015618   | RANBP6    |
| ENSG00000137054 | 8.872994239 | 8.827826712 | protein_coding | 9 | 37485932  | 37503694  | POLR1E    |
| ENSG00000137055 | 8.013936171 | 8.108014344 | protein_coding | 9 | 26904081  | 26947461  | PLAA      |
| ENSG00000137070 | 4.981125677 | 5.112089758 | protein_coding | 9 | 34650699  | 34661884  | IL11RA    |
| ENSG00000137073 | 9.841222348 | 9.52750079  | protein_coding | 9 | 33921691  | 34048947  | UBAP2     |
| ENSG00000137074 | 7.985986001 | 8.254769334 | protein_coding | 9 | 32972604  | 33025166  | APTX      |
| ENSG00000137075 | 7.46813618  | 7.348889996 | protein_coding | 9 | 36336393  | 36487545  | RNF38     |
| ENSG00000137076 | 12.33621351 | 12.51831426 | protein_coding | 9 | 35696945  | 35732392  | TLN1      |
| ENSG00000137077 | 0.869158192 | 0.697730409 | protein_coding | 9 | 34709002  | 34710121  | CCL21     |
| ENSG00000137094 | 7.15746161  | 7.679480043 | protein_coding | 9 | 34989638  | 34998897  | DNAJB5    |
| ENSG00000137098 | 1.960915222 | 3.183544561 | protein_coding | 9 | 35808042  | 35812269  | SPAG8     |
| ENSG00000137100 | 8.274885464 | 8.612036819 | protein_coding | 9 | 34613548  | 34620515  | DCTN3     |
| ENSG00000137101 | 1.799000381 | 1.925536307 | protein_coding | 9 | 35609530  | 35646807  | CD72      |
| ENSG00000137103 | 7.026383958 | 7.022976646 | protein_coding | 9 | 35814448  | 35854844  | TMEM8B    |
| ENSG00000137106 | 9.43383913  | 9.631842439 | protein_coding | 9 | 37422663  | 37436987  | GRHRP     |
| ENSG00000137124 | 10.37784053 | 10.11181153 | protein_coding | 9 | 38392661  | 38398658  | ALDH1B1   |
| ENSG00000137133 | 6.704935538 | 7.173524745 | protein_coding | 9 | 35812957  | 35815351  | HINT2     |
| ENSG00000137135 | 6.835971536 | 6.668971382 | protein_coding | 9 | 35658872  | 35675863  | C9orf100  |
| ENSG00000137142 | 3.698846687 | 5.816437314 | protein_coding | 9 | 38408991  | 38424444  | IGFBP11   |
| ENSG00000137145 | 7.420203928 | 7.38691391  | protein_coding | 9 | 19288622  | 19374275  | DENND4C   |
| ENSG00000137154 | 11.85926789 | 12.39229118 | protein_coding | 9 | 19375713  | 19380252  | RPS6      |
| ENSG00000137161 | 8.922987828 | 9.448154031 | protein_coding | 6 | 42896938  | 42907025  | CNPY3     |
| ENSG00000137166 | 10.49112996 | 10.37259961 | protein_coding | 6 | 41514164  | 41570122  | FOXP4     |
| ENSG00000137168 | 9.045401313 | 9.321350625 | protein_coding | 6 | 36822603  | 36842800  | PP1L1     |
| ENSG00000137171 | 7.985986001 | 8.450859136 | protein_coding | 6 | 43008515  | 43042837  | KLC4      |
| ENSG00000137177 | 9.415619969 | 9.498022112 | protein_coding | 6 | 17759414  | 17987854  | KIF13A    |
| ENSG00000137185 | 6.171673665 | 6.779278886 | protein_coding | 6 | 28192664  | 28201260  | ZNF193    |
| ENSG00000137193 | 9.27062517  | 9.073276144 | protein_coding | 6 | 37137979  | 37143202  | PIM1      |
| ENSG00000137198 | 5.207774174 | 5.953060722 | protein_coding | 6 | 16238811  | 16295780  | GMMPR     |
| ENSG00000137200 | 9.419108071 | 9.81731512  | protein_coding | 6 | 37400995  | 37450603  | FTSJD2    |
| ENSG00000137203 | 9.875269153 | 9.271406033 | protein_coding | 6 | 10393419  | 10419892  | TFAP2A    |
| ENSG00000137207 | 9.815645694 | 10.26404913 | protein_coding | 6 | 43479565  | 43484728  | YIPF3     |
| ENSG00000137210 | 8.457286611 | 9.119178324 | protein_coding | 6 | 10747973  | 10930656  | TMEM14B   |
| ENSG00000137216 | 8.565120083 | 8.634788863 | protein_coding | 6 | 44094651  | 44123256  | TMEM63B   |
| ENSG00000137218 | 4.230497448 | 4.622587519 | protein_coding | 6 | 41737914  | 41754280  | FRS3      |
| ENSG00000137221 | 9.185117095 | 9.242810972 | protein_coding | 6 | 43445261  | 43474294  | TJAP1     |
| ENSG00000137225 | 1.16343121  | 0           | protein_coding | 6 | 44126548  | 44152139  | CAPN11    |
| ENSG00000137259 | 0.869158192 | 0.697730409 | protein_coding | 6 | 26033320  | 26033796  | HIST1H2AB |
| ENSG00000137261 | 0.869158192 | 3.027231696 | protein_coding | 6 | 24544332  | 24646383  | KIAA0319  |
| ENSG00000137265 | 1.616589159 | 2.039052734 | protein_coding | 6 | 391739    | 411447    | IRF4      |
| ENSG00000137266 | 7.706593329 | 7.815148897 | protein_coding | 6 | 3269196   | 3457256   | SLC22A23  |
| ENSG00000137267 | 7.30049066  | 7.492830145 | protein_coding | 6 | 3153903   | 3157809   | TUBB2A    |
| ENSG00000137269 | 7.003331296 | 6.505763096 | protein_coding | 6 | 53659295  | 53788919  | LRRC1     |
| ENSG00000137270 | 0.869158192 | 0.390640832 | protein_coding | 6 | 52991762  | 53013627  | GCM1      |
| ENSG00000137274 | 6.749949642 | 7.073814954 | protein_coding | 6 | 3118608   | 3153812   | BPHL      |
| ENSG00000137275 | 8.447071828 | 8.690147008 | protein_coding | 6 | 3064092   | 3115421   | RIPK1     |
| ENSG00000137285 | 1.799000381 | 0.390640832 | protein_coding | 6 | 3224517   | 3231964   | TUBB2B    |
| ENSG00000137288 | 8.443650765 | 9.405128432 | protein_coding | 6 | 33665345  | 33679504  | C6orf125  |
| ENSG00000137309 | 13.47331321 | 12.89520344 | protein_coding | 6 | 34204577  | 34214008  | HMGA1     |
| ENSG00000137310 | 8.133414584 | 8.501254594 | protein_coding | 6 | 31126319  | 31134936  | TCF19     |
| ENSG00000137312 | 9.540974801 | 9.801313989 | protein_coding | 6 | 30695486  | 30710510  | FLOT1     |
| ENSG00000137331 | 12.19253252 | 12.01652799 | protein_coding | 6 | 30710976  | 30712331  | IER3      |
| ENSG00000137337 | 10.52915247 | 10.44261478 | protein_coding | 6 | 30667584  | 30685666  | MDC1      |
| ENSG00000137338 | 3.004694206 | 3.906303962 | protein_coding | 6 | 28249314  | 28270326  | PGBD1     |
| ENSG00000137343 | 6.749949642 | 7.326703453 | protein_coding | 6 | 30594619  | 30614600  | ATAT1     |
| ENSG00000137364 | 7.845284967 | 7.907733332 | protein_coding | 6 | 18128542  | 18155305  | TPMT      |
| ENSG00000137393 | 8.311006074 | 8.672662438 | protein_coding | 6 | 18368779  | 18469105  | RNF144B   |
| ENSG00000137404 | 8.487504052 | 8.391976969 | protein_coding | 6 | 30655824  | 30659197  | NRM       |
| ENSG00000137409 | 11.2978184  | 11.58403148 | protein_coding | 6 | 36935917  | 36954074  | MTCH1     |

|                 |             |             |                  |    |           |           |          |
|-----------------|-------------|-------------|------------------|----|-----------|-----------|----------|
| ENSG00000137411 | 8.675694252 | 9.038718229 | protein_coding   | 6  | 30876019  | 30894236  | VARS2    |
| ENSG00000137413 | 8.346244381 | 8.40394723  | protein_coding   | 6  | 42018251  | 42055199  | TAF8     |
| ENSG00000137414 | 7.642387679 | 7.632773539 | protein_coding   | 6  | 17600583  | 17611950  | FAM8A1   |
| ENSG00000137434 | 1.407729925 | 3.453019579 | protein_coding   | 6  | 10671651  | 10695030  | C6orf52  |
| ENSG00000137440 | 6.163378456 | 1.353254395 | protein_coding   | 4  | 15937192  | 15940363  | FGFBP1   |
| ENSG00000137449 | 7.08025234  | 7.070480904 | protein_coding   | 4  | 15004298  | 15071777  | CPEB2    |
| ENSG00000137460 | 6.129712275 | 6.338437404 | protein_coding   | 4  | 153857504 | 153900848 | FHDC1    |
| ENSG00000137462 | 7.876068031 | 8.754928172 | protein_coding   | 4  | 154622652 | 154626851 | TLR2     |
| ENSG00000137463 | 0.499066092 | 0.390640832 | protein_coding   | 4  | 140187317 | 140201492 | C4orf49  |
| ENSG00000137473 | 0           | 0.390640832 | protein_coding   | 4  | 147627790 | 147867034 | TTC29    |
| ENSG00000137474 | 6.212449006 | 4.841813558 | protein_coding   | 11 | 76839310  | 76926284  | MYO7A    |
| ENSG00000137478 | 7.651313074 | 7.903991977 | protein_coding   | 11 | 72547790  | 72853306  | FCHSD2   |
| ENSG00000137486 | 8.60394966  | 8.558303982 | protein_coding   | 11 | 74975226  | 75062873  | ARRB1    |
| ENSG00000137491 | 4.292665995 | 2.788380093 | protein_coding   | 11 | 74811608  | 74917594  | SLCO2B1  |
| ENSG00000137492 | 8.223944437 | 8.651620478 | protein_coding   | 11 | 76061000  | 76092015  | PRKRIR   |
| ENSG00000137494 | 6.975172889 | 7.195117037 | protein_coding   | 11 | 82904754  | 82971736  | ANKRD42  |
| ENSG00000137496 | 6.489593565 | 6.783357574 | protein_coding   | 11 | 71709587  | 71716761  | IL18BP   |
| ENSG00000137497 | 10.93696741 | 10.89400432 | protein_coding   | 11 | 71713910  | 71791739  | NUMA1    |
| ENSG00000137500 | 8.016241092 | 8.417132063 | protein_coding   | 11 | 82970139  | 82997450  | CCDC90B  |
| ENSG00000137501 | 8.133414584 | 8.282410365 | protein_coding   | 11 | 85405267  | 85522184  | SYTL2    |
| ENSG00000137502 | 7.285281023 | 7.598461017 | protein_coding   | 11 | 82684175  | 82782965  | RAB30    |
| ENSG00000137504 | 9.415619969 | 9.626176395 | protein_coding   | 11 | 85370752  | 85393951  | CREBZF   |
| ENSG00000137507 | 2.847891871 | 3.493416095 | protein_coding   | 11 | 76368568  | 76381791  | LRRC32   |
| ENSG00000137509 | 9.75276053  | 10.4845527  | protein_coding   | 11 | 82534544  | 82681626  | PRCP     |
| ENSG00000137513 | 8.316627558 | 8.594734178 | protein_coding   | 11 | 78147007  | 78285919  | NARS2    |
| ENSG00000137522 | 7.789781675 | 8.309531754 | protein_coding   | 11 | 71639747  | 71708643  | RNF121   |
| ENSG00000137547 | 9.016909338 | 9.472987904 | protein_coding   | 8  | 55047770  | 55060461  | MRPL15   |
| ENSG00000137558 | 0           | 0.390640832 | protein_coding   | 8  | 75736772  | 75767264  | PI15     |
| ENSG00000137563 | 8.251597515 | 8.962525691 | protein_coding   | 8  | 63927638  | 63951730  | GGH      |
| ENSG00000137571 | 5.301468762 | 5.893930351 | protein_coding   | 8  | 70584568  | 70747299  | SLCO5A1  |
| ENSG00000137573 | 0.499066092 | 0           | protein_coding   | 8  | 70378859  | 70573150  | SULF1    |
| ENSG00000137574 | 7.940593421 | 7.909600377 | protein_coding   | 8  | 56685701  | 56738007  | TGS1     |
| ENSG00000137575 | 10.58844284 | 10.78736503 | protein_coding   | 8  | 59465483  | 59495419  | SDCBP    |
| ENSG00000137601 | 7.797842652 | 8.449576416 | protein_coding   | 4  | 170314426 | 170533780 | NEK1     |
| ENSG00000137628 | 8.867898261 | 9.489309466 | protein_coding   | 4  | 169137444 | 169239958 | DDX60    |
| ENSG00000137634 | 0           | 0.390640832 | protein_coding   | 11 | 114441313 | 114466484 | FAM55D   |
| ENSG00000137642 | 8.032273249 | 7.103479673 | protein_coding   | 11 | 121322912 | 121504387 | SORL1    |
| ENSG00000137648 | 7.33043718  | 0.390640832 | protein_coding   | 11 | 117947753 | 117992605 | TMPRSS4  |
| ENSG00000137656 | 8.211928911 | 8.305283181 | protein_coding   | 11 | 116618886 | 116643704 | BUD13    |
| ENSG00000137673 | 1.799000381 | 0.950786998 | protein_coding   | 11 | 102391239 | 102401484 | MMP7     |
| ENSG00000137691 | 3.950976309 | 4.406904905 | protein_coding   | 11 | 101918174 | 101955291 | C11orf70 |
| ENSG00000137692 | 9.465390183 | 9.673093524 | protein_coding   | 11 | 102932805 | 102962944 | DCUN1D5  |
| ENSG00000137693 | 10.40887296 | 10.29258813 | protein_coding   | 11 | 101981192 | 102104154 | YAP1     |
| ENSG00000137699 | 5.91922012  | 4.021284656 | protein_coding   | 11 | 119981983 | 120056237 | TRIM29   |
| ENSG00000137700 | 8.195750939 | 8.509895614 | processed_transc | 11 | 118894824 | 118901616 | SLC37A4  |
| ENSG00000137707 | 0.499066092 | 0.390640832 | protein_coding   | 11 | 111338251 | 111383079 | BTG4     |
| ENSG00000137709 | 2.471521042 | 1.518964905 | protein_coding   | 11 | 120107349 | 120190653 | POU2F3   |
| ENSG00000137710 | 10.01896842 | 10.02835246 | protein_coding   | 11 | 110045605 | 110167447 | RDX      |
| ENSG00000137713 | 8.885655987 | 8.965221116 | protein_coding   | 11 | 111597632 | 111637169 | PPP2R1B  |
| ENSG00000137714 | 7.416718478 | 7.795089291 | protein_coding   | 11 | 110300607 | 110335605 | FDX1     |
| ENSG00000137720 | 6.220467583 | 6.592001111 | protein_coding   | 11 | 111749659 | 111756699 | C11orf1  |
| ENSG00000137727 | 1.407729925 | 1.16600992  | protein_coding   | 11 | 110447766 | 110583912 | ARHGAP20 |
| ENSG00000137745 | 5.637181576 | 2.652276565 | protein_coding   | 11 | 102813724 | 102826463 | MMP13    |
| ENSG00000137747 | 2.471521042 | 1.667587519 | protein_coding   | 11 | 117771358 | 117800174 | TMPRSS13 |
| ENSG00000137752 | 6.47626108  | 6.642271819 | protein_coding   | 11 | 104896170 | 104972158 | CASP1    |
| ENSG00000137757 | 0.499066092 | 0           | protein_coding   | 11 | 104864962 | 104893895 | CASP5    |
| ENSG00000137760 | 7.734859118 | 7.996490656 | protein_coding   | 11 | 107373452 | 107436472 | ALKBH8   |
| ENSG00000137764 | 7.15746161  | 7.36802722  | protein_coding   | 15 | 67835021  | 68116181  | MAP2K5   |
| ENSG00000137767 | 7.214780754 | 7.022976646 | protein_coding   | 15 | 45923346  | 45983492  | SQRDL    |
| ENSG00000137770 | 8.602416377 | 8.618900187 | protein_coding   | 15 | 44719432  | 44821236  | CTDSPL2  |
| ENSG00000137776 | 9.790280964 | 9.788181112 | protein_coding   | 15 | 59171244  | 59225852  | SLTM     |
| ENSG00000137801 | 12.55818714 | 12.33621903 | protein_coding   | 15 | 39873280  | 39891667  | THBS1    |
| ENSG00000137802 | 8.171138658 | 7.596144237 | protein_coding   | 15 | 42066632  | 42120053  | MAPKBP1  |

|                 |             |             |                |    |           |           |          |
|-----------------|-------------|-------------|----------------|----|-----------|-----------|----------|
| ENSG00000137804 | 9.889797802 | 10.14150744 | protein_coding | 15 | 41624892  | 41673248  | NUSAP1   |
| ENSG00000137806 | 7.53396104  | 7.534563804 | protein_coding | 15 | 41679551  | 41694717  | NDUFAF1  |
| ENSG00000137807 | 9.674658935 | 9.83559787  | protein_coding | 15 | 69706585  | 69740764  | KIF23    |
| ENSG00000137808 | 2.671945279 | 1.518964905 | protein_coding | 15 | 69222843  | 69355083  |          |
| ENSG00000137809 | 5.072559152 | 6.304782526 | protein_coding | 15 | 68594050  | 68724502  | ITGA11   |
| ENSG00000137812 | 8.790563466 | 8.826839049 | protein_coding | 15 | 40886218  | 40956540  | CASC5    |
| ENSG00000137814 | 8.462367008 | 8.326402026 | protein_coding | 15 | 42841008  | 42862192  | HAUS2    |
| ENSG00000137815 | 9.415619969 | 9.281534232 | protein_coding | 15 | 41700606  | 41775761  | RTF1     |
| ENSG00000137817 | 7.630400601 | 8.397309351 | protein_coding | 15 | 72533522  | 72565340  | PARP6    |
| ENSG00000137818 | 12.25205067 | 12.6868007  | protein_coding | 15 | 69745123  | 69748255  | RPLP1    |
| ENSG00000137819 | 7.68357507  | 6.582669759 | protein_coding | 15 | 69591286  | 69700119  | PAQR5    |
| ENSG00000137821 | 6.670228606 | 7.087074634 | protein_coding | 15 | 71145578  | 71342418  | LRRCA9   |
| ENSG00000137822 | 9.074447906 | 8.309531754 | protein_coding | 15 | 43661419  | 43699293  | TUBGCP4  |
| ENSG00000137824 | 8.3480754   | 8.347216179 | protein_coding | 15 | 41028082  | 41048049  | FAM82A2  |
| ENSG00000137825 | 3.211941663 | 4.075511708 | protein_coding | 15 | 41785591  | 41795747  | ITPKA    |
| ENSG00000137831 | 9.331123617 | 9.590541354 | protein_coding | 15 | 70946893  | 71055932  | UACA     |
| ENSG00000137834 | 6.112579918 | 6.002883551 | protein_coding | 15 | 66994670  | 67074338  | SMAD6    |
| ENSG00000137841 | 3.830412367 | 3.813624741 | protein_coding | 15 | 40570377  | 40600136  | PLCB2    |
| ENSG00000137842 | 6.17992145  | 6.460630645 | protein_coding | 15 | 43415477  | 43477344  | TMEM62   |
| ENSG00000137843 | 8.114176072 | 3.183544561 | protein_coding | 15 | 40509629  | 40569688  | PAK6     |
| ENSG00000137845 | 10.92628281 | 10.6782458  | protein_coding | 15 | 58887403  | 59042177  | ADAM10   |
| ENSG00000137857 | 3.78787645  | 3.748356452 | protein_coding | 15 | 45422131  | 45457774  | DUOX1    |
| ENSG00000137860 | 0           | 0.697730409 | protein_coding | 15 | 45544428  | 45568149  | SLC28A2  |
| ENSG00000137868 | 8.98901727  | 7.955508102 | protein_coding | 15 | 74471807  | 74502046  | STRA6    |
| ENSG00000137871 | 7.1740722   | 7.551403417 | protein_coding | 15 | 56922379  | 57210769  | ZNF280D  |
| ENSG00000137875 | 2.471521042 | 2.039052734 | protein_coding | 15 | 52401460  | 52404972  | BCL2L10  |
| ENSG00000137876 | 9.483828293 | 9.861871738 | protein_coding | 15 | 55473004  | 55489265  | RSL24D1  |
| ENSG00000137877 | 3.077135474 | 2.912743273 | protein_coding | 15 | 42140345  | 42186275  | SPTBN5   |
| ENSG00000137878 | 4.437288965 | 3.183544561 | protein_coding | 15 | 57884106  | 58006943  | GCOM1    |
| ENSG00000137880 | 5.286269488 | 4.640685763 | protein_coding | 15 | 41056218  | 41059906  | GCHFR    |
| ENSG00000137936 | 8.814599602 | 8.774525884 | protein_coding | 1  | 94027347  | 94312706  | BCAR3    |
| ENSG00000137941 | 5.270908378 | 6.610484676 | protein_coding | 1  | 84330711  | 84464833  | TTLL7    |
| ENSG00000137942 | 6.861834435 | 7.100213554 | protein_coding | 1  | 93913658  | 94020218  | FNBP1L   |
| ENSG00000137944 | 6.541724534 | 7.307006333 | protein_coding | 1  | 89401456  | 89458636  | CCBL2    |
| ENSG00000137947 | 7.08025234  | 7.060432274 | protein_coding | 1  | 89318615  | 89357627  | GTF2B    |
| ENSG00000137955 | 9.771301603 | 9.682405806 | protein_coding | 1  | 76251879  | 76261100  | RABGGTB  |
| ENSG00000137959 | 7.464764762 | 9.272131838 | protein_coding | 1  | 79085607  | 79108484  | IFI44L   |
| ENSG00000137960 | 0.869158192 | 0.697730409 | protein_coding | 1  | 78445226  | 78604133  | GIPC2    |
| ENSG00000137962 | 10.00626968 | 9.505448443 | protein_coding | 1  | 94614544  | 94740624  | ARHGAP29 |
| ENSG00000137965 | 8.713115882 | 9.302290571 | protein_coding | 1  | 79115481  | 79129763  | IFI44    |
| ENSG00000137970 | 1.407729925 | 1.802319292 | pseudogene     | 1  | 97144430  | 97145176  |          |
| ENSG00000137975 | 1.960915222 | 1.353254395 | protein_coding | 1  | 86889769  | 86922241  | CLCA2    |
| ENSG00000137992 | 7.132181536 | 6.870289474 | protein_coding | 1  | 100659634 | 100715390 | DBT      |
| ENSG00000137996 | 8.327805238 | 8.18248514  | protein_coding | 1  | 100731763 | 100758325 | RTCD1    |
| ENSG00000138002 | 8.391336806 | 8.88967084  | protein_coding | 2  | 27667238  | 27712656  | IFT172   |
| ENSG00000138018 | 9.834054211 | 9.85268169  | protein_coding | 2  | 26531415  | 26618759  | EPT1     |
| ENSG00000138028 | 0           | 0.390640832 | protein_coding | 2  | 27321757  | 27341995  | CGREF1   |
| ENSG00000138029 | 9.515945881 | 10.037346   | protein_coding | 2  | 26466038  | 26513336  | HADHB    |
| ENSG00000138030 | 4.165528823 | 5.283144778 | protein_coding | 2  | 27309615  | 27323640  | KHK      |
| ENSG00000138031 | 9.43986141  | 8.599368544 | protein_coding | 2  | 25042038  | 25142708  | ADCY3    |
| ENSG00000138032 | 8.269098624 | 8.621180739 | protein_coding | 2  | 44395108  | 44471523  | PPM1B    |
| ENSG00000138035 | 8.840844993 | 9.322752514 | protein_coding | 2  | 55861400  | 55921045  | PNPT1    |
| ENSG00000138036 | 6.146643566 | 6.699508919 | protein_coding | 2  | 44001178  | 44037149  | DYNC2LI1 |
| ENSG00000138041 | 9.514316103 | 9.599243793 | protein_coding | 2  | 55774428  | 55846015  | SMEK2    |
| ENSG00000138050 | 6.749949642 | 6.97385478  | protein_coding | 2  | 39963200  | 40006407  | THUMP2   |
| ENSG00000138061 | 12.04865098 | 11.59480528 | protein_coding | 2  | 38294116  | 38337044  | CYP11B1  |
| ENSG00000138069 | 10.2173189  | 10.17991662 | protein_coding | 2  | 65297835  | 65357240  | RAB1A    |
| ENSG00000138071 | 11.21545961 | 11.49900721 | protein_coding | 2  | 65454887  | 65498387  | ACTR2    |
| ENSG00000138073 | 9.61887538  | 9.849767366 | protein_coding | 2  | 27353624  | 27357543  | PREB     |
| ENSG00000138074 | 9.510233586 | 9.730200815 | protein_coding | 2  | 27422455  | 27435826  | SLC5A6   |
| ENSG00000138075 | 0.499066092 | 1.16600992  | protein_coding | 2  | 44039611  | 44066004  | ABCG5    |
| ENSG00000138078 | 8.910650905 | 9.178452256 | protein_coding | 2  | 44543420  | 44589001  | PREPL    |
| ENSG00000138079 | 0.499066092 | 1.353254395 | protein_coding | 2  | 44502599  | 44548633  | SLC3A1   |

|                 |             |             |                |    |           |           |          |
|-----------------|-------------|-------------|----------------|----|-----------|-----------|----------|
| ENSG00000138080 | 3.448790144 | 3.64455972  | protein_coding | 2  | 27301435  | 27309271  | EMILIN1  |
| ENSG00000138081 | 9.253142682 | 9.472356449 | protein_coding | 2  | 48016455  | 48132932  | FBXO11   |
| ENSG00000138083 | 2.10647801  | 2.579085888 | protein_coding | 2  | 45168902  | 45173216  | SIX3     |
| ENSG00000138085 | 8.888175056 | 9.478658596 | protein_coding | 2  | 27434895  | 27440046  | C2orf28  |
| ENSG00000138092 | 8.043616684 | 7.55379311  | protein_coding | 2  | 25016005  | 25045245  | CENPO    |
| ENSG00000138095 | 11.32967441 | 11.44885281 | protein_coding | 2  | 44113363  | 44223144  | LRPPRC   |
| ENSG00000138100 | 2.928422289 | 2.971122874 | protein_coding | 2  | 27505260  | 27600344  | TRIM54   |
| ENSG00000138101 | 7.01259661  | 6.293387477 | protein_coding | 2  | 25600067  | 25896503  | DTNB     |
| ENSG00000138107 | 10.92137194 | 11.11379372 | protein_coding | 10 | 104238986 | 104262482 | ACTR1A   |
| ENSG00000138109 | 2.928422289 | 0           | protein_coding | 10 | 96698415  | 96749447  | CYP2C9   |
| ENSG00000138111 | 7.478203418 | 7.359856617 | protein_coding | 10 | 104221149 | 104239484 | TMEM180  |
| ENSG00000138115 | 1.407729925 | 3.493416095 | protein_coding | 10 | 96796530  | 96829254  | CYP2C8   |
| ENSG00000138119 | 12.27099476 | 12.24664642 | protein_coding | 10 | 95066186  | 95242074  | MYOF     |
| ENSG00000138131 | 5.995967334 | 5.372493443 | protein_coding | 10 | 100007447 | 100028007 | LOXL4    |
| ENSG00000138134 | 7.593829938 | 7.641787375 | protein_coding | 10 | 90639491  | 90734910  | STAMBPL1 |
| ENSG00000138135 | 1.960915222 | 2.721932731 | protein_coding | 10 | 90965694  | 90967071  | CH25H    |
| ENSG00000138138 | 8.687312327 | 9.11108789  | protein_coding | 10 | 89511269  | 89601100  | ATAD1    |
| ENSG00000138152 | 0.869158192 | 0.390640832 | protein_coding | 10 | 124030821 | 124097677 | BTBD16   |
| ENSG00000138160 | 9.722025379 | 9.873875397 | protein_coding | 10 | 94353043  | 94415150  | KIF11    |
| ENSG00000138161 | 2.762599152 | 4.528525526 | protein_coding | 10 | 124591665 | 124639146 | CUZD1    |
| ENSG00000138162 | 8.810621286 | 8.85617872  | protein_coding | 10 | 123748689 | 124014060 | TACC2    |
| ENSG00000138166 | 10.10215133 | 8.42106413  | protein_coding | 10 | 112257596 | 112271302 | DUSP5    |
| ENSG00000138172 | 9.089849478 | 9.439780161 | protein_coding | 10 | 105206543 | 105212660 | CALHM2   |
| ENSG00000138175 | 7.345180517 | 8.005247922 | protein_coding | 10 | 104436315 | 104474164 | ARL3     |
| ENSG00000138180 | 9.704266019 | 10.05853621 | protein_coding | 10 | 95256389  | 95288849  | CEP55    |
| ENSG00000138182 | 9.070017088 | 9.355310748 | protein_coding | 10 | 91461367  | 91534700  | KIF20B   |
| ENSG00000138185 | 7.514527001 | 7.999999944 | protein_coding | 10 | 97454774  | 97637023  | ENTPD1   |
| ENSG00000138190 | 7.071412799 | 7.593823731 | protein_coding | 10 | 94590935  | 94819250  | EXOC6    |
| ENSG00000138193 | 7.15746161  | 7.903991977 | protein_coding | 10 | 95753746  | 96088149  | PLCE1    |
| ENSG00000138231 | 7.778963161 | 7.752033772 | protein_coding | 3  | 137879854 | 137893791 | DBR1     |
| ENSG00000138246 | 10.02984629 | 9.951142479 | protein_coding | 3  | 132136370 | 132257876 | DNAJC13  |
| ENSG00000138271 | 6.522395495 | 1.518964905 | protein_coding | 3  | 151011891 | 151034740 | GPR87    |
| ENSG00000138279 | 10.42110141 | 9.960628829 | protein_coding | 10 | 75135203  | 75173834  | ANXA7    |
| ENSG00000138286 | 7.413224588 | 7.142107001 | protein_coding | 10 | 74927924  | 75004262  | FAM149B1 |
| ENSG00000138293 | 10.8217796  | 10.45225374 | protein_coding | 10 | 51565108  | 51590734  | NCOA4    |
| ENSG00000138297 | 8.517101548 | 8.231074746 | protein_coding | 10 | 51592080  | 51623365  | TIMM23   |
| ENSG00000138303 | 8.398422578 | 7.95731437  | protein_coding | 10 | 73856278  | 73980083  | ASCC1    |
| ENSG00000138311 | 2.671945279 | 2.579085888 | protein_coding | 10 | 64133951  | 64431771  | ZNF365   |
| ENSG00000138316 | 3.146112541 | 4.250702764 | protein_coding | 10 | 72432559  | 72522197  | ADAMTS14 |
| ENSG00000138326 | 12.09108862 | 12.83218685 | protein_coding | 10 | 79793518  | 79816570  | RPS24    |
| ENSG00000138336 | 3.989024711 | 3.133298822 | protein_coding | 10 | 70320413  | 70454239  | TET1     |
| ENSG00000138346 | 7.913645586 | 7.58917149  | protein_coding | 10 | 70173821  | 70231879  | DNA2     |
| ENSG00000138347 | 3.502389126 | 2.579085888 | protein_coding | 10 | 69865912  | 69971774  | MYPN     |
| ENSG00000138356 | 6.567100227 | 7.815148897 | protein_coding | 2  | 201450591 | 201541787 | AOX1     |
| ENSG00000138363 | 10.69946212 | 10.29616073 | protein_coding | 2  | 216176540 | 216214487 | ATIC     |
| ENSG00000138375 | 8.844740944 | 8.635917101 | protein_coding | 2  | 217277137 | 217347776 | SMARCAL1 |
| ENSG00000138376 | 7.726437377 | 7.53698153  | protein_coding | 2  | 215590370 | 215674428 | BARD1    |
| ENSG00000138378 | 2.847891871 | 1.518964905 | protein_coding | 2  | 191894302 | 192016322 | STAT4    |
| ENSG00000138380 | 4.568725997 | 5.03207928  | protein_coding | 2  | 203776937 | 203851060 | ALS2CR8  |
| ENSG00000138381 | 9.081068723 | 9.212881815 | protein_coding | 2  | 190526146 | 190535557 | ASNSD1   |
| ENSG00000138382 | 7.923503136 | 8.122575449 | protein_coding | 2  | 170666591 | 170681441 | METTL5   |
| ENSG00000138385 | 10.02298561 | 10.12231502 | protein_coding | 2  | 170648443 | 170668574 | SSB      |
| ENSG00000138386 | 8.057112115 | 7.457530976 | protein_coding | 2  | 191511472 | 191557492 | NAB1     |
| ENSG00000138395 | 1.407729925 | 1.16600992  | protein_coding | 2  | 202655184 | 202760273 | CDK15    |
| ENSG00000138398 | 9.505319266 | 9.409093306 | protein_coding | 2  | 170440850 | 170504696 | PPIG     |
| ENSG00000138399 | 8.12703021  | 7.992972811 | protein_coding | 2  | 170386259 | 170430385 | FASTKD1  |
| ENSG00000138400 | 2.35979773  | 3.081239798 | protein_coding | 2  | 207602487 | 207630271 | MDH1B    |
| ENSG00000138411 | 6.699208722 | 6.371325053 | protein_coding | 2  | 197063977 | 197458416 | HECW2    |
| ENSG00000138413 | 9.564002263 | 8.539135107 | protein_coding | 2  | 209100951 | 209130798 | IDH1     |
| ENSG00000138430 | 9.915339294 | 9.919526433 | protein_coding | 2  | 174937175 | 175113426 | OLA1     |
| ENSG00000138433 | 7.671926738 | 7.776794036 | protein_coding | 2  | 175212749 | 175260443 | CIR1     |
| ENSG00000138434 | 9.733978068 | 9.606168145 | protein_coding | 2  | 182756560 | 182795465 | SSFA2    |
| ENSG00000138439 | 7.553136766 | 7.033288635 | protein_coding | 2  | 203499901 | 203634480 | FAM117B  |

|                 |             |             |                |    |           |           |           |
|-----------------|-------------|-------------|----------------|----|-----------|-----------|-----------|
| ENSG00000138442 | 8.978417134 | 8.820898829 | protein_coding | 2  | 203745323 | 203879521 | WDR12     |
| ENSG00000138443 | 9.327415887 | 8.418443943 | protein_coding | 2  | 204192942 | 204301606 | ABI2      |
| ENSG00000138448 | 10.74394947 | 10.76123697 | protein_coding | 2  | 187454790 | 187545628 | ITGAV     |
| ENSG00000138449 | 0.869158192 | 1.353254395 | protein_coding | 2  | 190425305 | 190448484 | SLC40A1   |
| ENSG00000138459 | 7.234712227 | 7.768587741 | protein_coding | 3  | 112280556 | 112304424 | SLC35A5   |
| ENSG00000138463 | 7.30049066  | 7.766528853 | protein_coding | 3  | 122513642 | 122599986 | DIRC2     |
| ENSG00000138468 | 6.727618145 | 6.995112131 | protein_coding | 3  | 101043049 | 101232085 | SENP7     |
| ENSG00000138483 | 0.499066092 | 0.697730409 | protein_coding | 3  | 107096188 | 107097481 | CCDC54    |
| ENSG00000138495 | 6.236372259 | 6.520498852 | protein_coding | 3  | 119373360 | 119396301 | COX17     |
| ENSG00000138496 | 8.779750834 | 8.966118473 | protein_coding | 3  | 122246806 | 122283424 | PARP9     |
| ENSG00000138587 | 5.899377978 | 6.24096575  | protein_coding | 15 | 56713742  | 56757335  | MNS1      |
| ENSG00000138592 | 8.47750173  | 8.431497548 | protein_coding | 15 | 50716577  | 50793280  | USP8      |
| ENSG00000138593 | 7.930852348 | 8.25035614  | protein_coding | 15 | 49280673  | 49338760  | SECISBP2L |
| ENSG00000138594 | 9.4269256   | 9.094769627 | protein_coding | 15 | 52121825  | 52239492  | TMOD3     |
| ENSG00000138600 | 7.778963161 | 8.379906558 | protein_coding | 15 | 50999506  | 51058005  |           |
| ENSG00000138604 | 8.375265417 | 8.570156468 | protein_coding | 15 | 69452923  | 69564544  | GLCE      |
| ENSG00000138606 | 1.960915222 | 3.368666104 | protein_coding | 15 | 45459411  | 45493373  | SHF       |
| ENSG00000138613 | 6.032862302 | 6.779278886 | protein_coding | 15 | 63568217  | 63601325  | APH1B     |
| ENSG00000138614 | 8.876804446 | 8.940779054 | protein_coding | 15 | 65871091  | 65903627  | C15orf44  |
| ENSG00000138615 | 1.16343121  | 1.925536307 | protein_coding | 15 | 65488337  | 65503826  | CILP      |
| ENSG00000138617 | 6.92698535  | 6.835357159 | protein_coding | 15 | 65526798  | 65592956  | PARP16    |
| ENSG00000138621 | 6.407685389 | 6.771086752 | protein_coding | 15 | 75315896  | 75409803  | PPCDC     |
| ENSG00000138622 | 6.103936836 | 7.012590419 | protein_coding | 15 | 73612200  | 73661605  | HCN4      |
| ENSG00000138623 | 8.848626402 | 6.742042315 | protein_coding | 15 | 74701630  | 74726808  | SEMA7A    |
| ENSG00000138629 | 9.056642394 | 9.204541268 | protein_coding | 15 | 74738318  | 74753523  | UBL7      |
| ENSG00000138639 | 6.887241849 | 7.272601283 | protein_coding | 4  | 86396267  | 86923823  | ARHGAP24  |
| ENSG00000138640 | 7.916116295 | 8.053329862 | protein_coding | 4  | 89647106  | 90032549  | FAM13A    |
| ENSG00000138641 | 6.350376764 | 6.044260771 | protein_coding | 4  | 89444961  | 89629693  | HERC3     |
| ENSG00000138642 | 8.156585168 | 9.010289238 | protein_coding | 4  | 89299891  | 89364263  | HERC6     |
| ENSG00000138646 | 8.133414584 | 8.965221116 | protein_coding | 4  | 89378268  | 89427314  | HERC5     |
| ENSG00000138658 | 7.017207048 | 7.718344862 | protein_coding | 4  | 113460492 | 113558151 | C4orf21   |
| ENSG00000138660 | 7.921045056 | 8.168519197 | protein_coding | 4  | 113152893 | 113191203 | AP1AR     |
| ENSG00000138663 | 8.150302734 | 8.341695034 | protein_coding | 4  | 83955600  | 83996971  | COPS4     |
| ENSG00000138668 | 11.79913269 | 11.44853179 | protein_coding | 4  | 83273651  | 83295656  | HNRNPD    |
| ENSG00000138670 | 0.869158192 | 0           | protein_coding | 4  | 82347547  | 82393082  | RASGEF1B  |
| ENSG00000138674 | 10.90622757 | 10.89306095 | protein_coding | 4  | 83739814  | 83822319  | SEC31A    |
| ENSG00000138678 | 7.254372086 | 4.932754837 | protein_coding | 4  | 84457067  | 84527028  | AGPAT9    |
| ENSG00000138685 | 1.799000381 | 1.353254395 | protein_coding | 4  | 123747863 | 123819391 | FGF2      |
| ENSG00000138686 | 6.965663283 | 7.359856617 | protein_coding | 4  | 122745595 | 122791652 | BBS7      |
| ENSG00000138688 | 8.375265417 | 8.506198656 | protein_coding | 4  | 123073488 | 123283913 | KIAA1109  |
| ENSG00000138696 | 5.83815965  | 6.016808232 | protein_coding | 4  | 95679119  | 96079599  | BMPR1B    |
| ENSG00000138698 | 9.043142548 | 9.120790981 | protein_coding | 4  | 99182535  | 99365012  | RAP1GDS1  |
| ENSG00000138709 | 7.943018447 | 7.705505903 | protein_coding | 4  | 128982423 | 129144086 | LARP1B    |
| ENSG00000138735 | 6.733233509 | 6.712401119 | protein_coding | 4  | 120415550 | 120550146 | PDE5A     |
| ENSG00000138744 | 7.22677265  | 6.847095496 | protein_coding | 4  | 76831809  | 76862204  | NAAA      |
| ENSG00000138750 | 8.497437504 | 8.621180739 | protein_coding | 4  | 77035812  | 77069668  | NUP54     |
| ENSG00000138755 | 0.869158192 | 0.950786998 | protein_coding | 4  | 76922428  | 76928641  | CXCL9     |
| ENSG00000138756 | 7.384964606 | 7.741590246 | protein_coding | 4  | 79697496  | 79837526  | BMP2K     |
| ENSG00000138757 | 10.71089111 | 10.72432142 | protein_coding | 4  | 76567966  | 76649709  | G3BP2     |
| ENSG00000138758 | 10.41062624 | 10.16826693 | protein_coding | 4  | 77870856  | 77961537  | 11-sep    |
| ENSG00000138759 | 7.498129565 | 8.008735998 | protein_coding | 4  | 78978724  | 79465423  | FRAS1     |
| ENSG00000138760 | 10.28960502 | 10.71874163 | protein_coding | 4  | 77079890  | 77135046  | SCARB2    |
| ENSG00000138764 | 7.615275323 | 8.104758487 | protein_coding | 4  | 78078304  | 78354542  | CCNG2     |
| ENSG00000138767 | 8.33889698  | 8.615472585 | protein_coding | 4  | 78634541  | 78740769  | CNOT6L    |
| ENSG00000138768 | 10.09943635 | 10.22522208 | protein_coding | 4  | 76649762  | 76735382  | USO1      |
| ENSG00000138769 | 0.499066092 | 2.242360793 | protein_coding | 4  | 76503215  | 76555900  | CDKL2     |
| ENSG00000138771 | 9.664408419 | 8.648269828 | protein_coding | 4  | 77356253  | 77704406  | SHROOM3   |
| ENSG00000138772 | 10.14174685 | 10.48986626 | protein_coding | 4  | 79472673  | 79531597  | ANXA3     |
| ENSG00000138777 | 8.048129203 | 8.686884751 | protein_coding | 4  | 106290234 | 106395238 | PPA2      |
| ENSG00000138778 | 8.853790788 | 9.040423325 | protein_coding | 4  | 104026963 | 104119566 | CENPE     |
| ENSG00000138780 | 7.23866569  | 7.36802722  | protein_coding | 4  | 106629935 | 106768885 | GSTCD     |
| ENSG00000138785 | 7.136425764 | 7.148445524 | protein_coding | 4  | 106603784 | 106817143 | INTS12    |
| ENSG00000138792 | 3.448790144 | 3.570966319 | protein_coding | 4  | 111286889 | 111486441 | ENPEP     |



|                 |             |             |                |    |           |           |           |
|-----------------|-------------|-------------|----------------|----|-----------|-----------|-----------|
| ENSG00000138794 | 5.869093502 | 5.42565083  | protein_coding | 4  | 110609785 | 110624739 | CASP6     |
| ENSG00000138795 | 0           | 0.697730409 | protein_coding | 4  | 108968701 | 109090112 | LEF1      |
| ENSG00000138796 | 8.593182305 | 8.89533508  | protein_coding | 4  | 108910870 | 108956331 | HADH      |
| ENSG00000138798 | 0.869158192 | 2.851901313 | protein_coding | 4  | 110834040 | 110933422 | EGF       |
| ENSG00000138801 | 8.16075831  | 8.377210474 | protein_coding | 4  | 108511433 | 108641608 | PAPSS1    |
| ENSG00000138802 | 8.925442603 | 8.784734524 | protein_coding | 4  | 110354928 | 110461612 | SEC24B    |
| ENSG00000138814 | 9.735377778 | 9.448796166 | protein_coding | 4  | 101944566 | 102269435 | PPP3CA    |
| ENSG00000138821 | 8.682966505 | 9.379087693 | protein_coding | 4  | 103172198 | 103352415 | SLC39A8   |
| ENSG00000138823 | 0.499066092 | 1.16600992  | protein_coding | 4  | 100484918 | 100545156 | MTTP      |
| ENSG00000138829 | 0.499066092 | 1.353254395 | protein_coding | 5  | 127593601 | 127994878 | FBN2      |
| ENSG00000138834 | 9.837968518 | 10.11221693 | protein_coding | 16 | 1756184   | 1820318   | MAPK8IP3  |
| ENSG00000138835 | 9.016909338 | 8.948972504 | protein_coding | 9  | 116207011 | 116360018 | RGS3      |
| ENSG00000138867 | 10.10269371 | 9.86620457  | protein_coding | 22 | 24936406  | 24951903  | C22orf13  |
| ENSG00000138942 | 9.086562954 | 9.391832931 | protein_coding | 22 | 31556168  | 31602999  | RNF185    |
| ENSG00000138944 | 5.417620896 | 6.835357159 | protein_coding | 22 | 44639547  | 44708731  | KIAA1644  |
| ENSG00000138964 | 0           | 0.390640832 | protein_coding | 22 | 44568836  | 44615413  | PARVG     |
| ENSG00000139044 | 6.502803968 | 4.15321211  | protein_coding | 12 | 569530    | 672675    | B4GALNT3  |
| ENSG00000139055 | 2.10647801  | 0           | protein_coding | 12 | 15066969  | 15092016  | ERP27     |
| ENSG00000139083 | 7.876068031 | 7.449853178 | protein_coding | 12 | 11802788  | 12044558  | ETV6      |
| ENSG00000139112 | 8.766120079 | 8.593573257 | protein_coding | 12 | 10365057  | 10375727  | GABARAPL1 |
| ENSG00000139116 | 9.113724571 | 9.305839261 | protein_coding | 12 | 39687030  | 39837192  | KIF21A    |
| ENSG00000139117 | 7.925957035 | 8.240005883 | protein_coding | 12 | 39040624  | 39301232  | CPNE8     |
| ENSG00000139131 | 8.531675665 | 8.695567763 | protein_coding | 12 | 32880424  | 32908836  | YARS2     |
| ENSG00000139132 | 6.228441838 | 5.339632724 | protein_coding | 12 | 32552463  | 32798984  | FGD4      |
| ENSG00000139133 | 4.999881834 | 5.638744877 | protein_coding | 12 | 34175216  | 34182629  | ALG10     |
| ENSG00000139144 | 1.16343121  | 0.697730409 | protein_coding | 12 | 18400548  | 18801348  | PIK3C2G   |
| ENSG00000139146 | 10.09344535 | 9.545623701 | protein_coding | 12 | 31433518  | 31479992  | FAM60A    |
| ENSG00000139154 | 8.883132512 | 8.205465413 | protein_coding | 12 | 19556979  | 19873735  | AEBP2     |
| ENSG00000139160 | 3.78787645  | 3.87606762  | protein_coding | 12 | 31800094  | 31826048  | METTL20   |
| ENSG00000139163 | 7.123655438 | 7.033288635 | protein_coding | 12 | 22778009  | 22838646  | ETNK1     |
| ENSG00000139168 | 8.583888749 | 8.825850709 | protein_coding | 12 | 42705880  | 42719920  | ZCRB1     |
| ENSG00000139173 | 4.062237333 | 2.652276565 | protein_coding | 12 | 44229770  | 44783545  | TMEM117   |
| ENSG00000139174 | 6.931877181 | 6.729413443 | protein_coding | 12 | 42852140  | 42984157  | PRICKLE1  |
| ENSG00000139178 | 9.05552222  | 8.915915748 | protein_coding | 12 | 7242183   | 7261869   | C1RL      |
| ENSG00000139180 | 8.325948295 | 8.37044814  | protein_coding | 12 | 4714110   | 4798454   | NDUFA9    |
| ENSG00000139182 | 8.299696963 | 7.778838337 | protein_coding | 12 | 7282294   | 7311541   | CLSTN3    |
| ENSG00000139187 | 3.211941663 | 3.748356452 | protein_coding | 12 | 9102640   | 9163356   | KLRG1     |
| ENSG00000139190 | 5.613019223 | 5.776071827 | protein_coding | 12 | 6571403   | 6580153   | VAMP1     |
| ENSG00000139192 | 7.837485466 | 7.977035488 | protein_coding | 12 | 6560856   | 6575683   | TAPBPL    |
| ENSG00000139193 | 1.960915222 | 1.925536307 | protein_coding | 12 | 6554033   | 6560884   | CD27      |
| ENSG00000139194 | 4.352265886 | 4.202780776 | protein_coding | 12 | 7276280   | 7281538   | RBP5      |
| ENSG00000139197 | 9.509415694 | 9.423538659 | protein_coding | 12 | 7341281   | 7371170   | PEX5      |
| ENSG00000139200 | 1.407729925 | 0.950786998 | protein_coding | 12 | 6802958   | 6809981   | C12orf53  |
| ENSG00000139209 | 1.16343121  | 1.353254395 | protein_coding | 12 | 47158544  | 47226191  | SLC38A4   |
| ENSG00000139211 | 8.632776617 | 8.628000846 | protein_coding | 12 | 47469490  | 47473734  | AMIGO2    |
| ENSG00000139218 | 9.591313258 | 9.733893656 | protein_coding | 12 | 46312914  | 46385903  | SCAF11    |
| ENSG00000139219 | 0           | 1.353254395 | protein_coding | 12 | 48366748  | 48398269  | COL2A1    |
| ENSG00000139233 | 7.250461488 | 6.945015469 | protein_coding | 12 | 66516842  | 66524548  | LLPH      |
| ENSG00000139239 | 4.026095388 | 3.081239798 | pseudogene     | 12 | 63359095  | 63359764  | RPL14P1   |
| ENSG00000139263 | 8.408986408 | 8.289597152 | protein_coding | 12 | 59265931  | 59314303  | LRIG3     |
| ENSG00000139266 | 5.346128795 | 5.09905904  | protein_coding | 12 | 58148881  | 58154190  | 9-Mar     |
| ENSG00000139269 | 7.296703257 | 7.666288907 | protein_coding | 12 | 57846106  | 57853063  | INHBE     |
| ENSG00000139278 | 8.794597401 | 9.644790504 | protein_coding | 12 | 75874460  | 75897633  | GLIPR1    |
| ENSG00000139287 | 1.16343121  | 0.697730409 | protein_coding | 12 | 72332626  | 72580398  | TPH2      |
| ENSG00000139289 | 11.15712394 | 9.540210691 | protein_coding | 12 | 76419227  | 76427712  | PHLDA1    |
| ENSG00000139291 | 6.798966424 | 6.858739095 | protein_coding | 12 | 72079867  | 72097836  | TMEM19    |
| ENSG00000139318 | 7.855619141 | 7.741590246 | protein_coding | 12 | 89741050  | 89747048  | DUSP6     |
| ENSG00000139323 | 7.311793575 | 7.426571535 | protein_coding | 12 | 89813495  | 89919801  | POC1B     |
| ENSG00000139324 | 8.631273684 | 8.568975592 | protein_coding | 12 | 88536073  | 88593664  | TMTC3     |
| ENSG00000139329 | 1.407729925 | 3.679994897 | protein_coding | 12 | 91496406  | 91505608  | LUM       |
| ENSG00000139343 | 8.915598341 | 8.852301067 | protein_coding | 12 | 96252706  | 96297606  | SNRPF     |
| ENSG00000139344 | 2.928422289 | 2.971122874 | protein_coding | 12 | 96337071  | 96362370  | AMDHD1    |
| ENSG00000139350 | 8.251597515 | 8.568975592 | protein_coding | 12 | 97301001  | 97347129  | NEDD1     |

|                 |             |             |                |    |           |           |           |
|-----------------|-------------|-------------|----------------|----|-----------|-----------|-----------|
| ENSG00000139351 | 1.407729925 | 1.925536307 | protein_coding | 12 | 102122426 | 102133250 | SYCP3     |
| ENSG00000139352 | 0.499066092 | 0           | protein_coding | 12 | 103351464 | 103354294 | ASCL1     |
| ENSG00000139354 | 7.64536895  | 7.616862529 | protein_coding | 12 | 100967461 | 101022064 | GAS2L3    |
| ENSG00000139364 | 0.499066092 | 0.697730409 | protein_coding | 12 | 125671382 | 126146917 | TMEM132B  |
| ENSG00000139370 | 8.077121473 | 8.288162655 | protein_coding | 12 | 129277739 | 129308528 | SLC15A4   |
| ENSG00000139372 | 8.009315251 | 8.506198656 | protein_coding | 12 | 104359582 | 104382652 | TDG       |
| ENSG00000139405 | 8.991362316 | 8.804937616 | protein_coding | 12 | 113623331 | 113630173 | C12orf52  |
| ENSG00000139410 | 7.136425764 | 7.799123587 | protein_coding | 12 | 113860042 | 113876081 | SDSL      |
| ENSG00000139428 | 7.893726093 | 7.63953919  | protein_coding | 12 | 109993255 | 110011679 | MMAB      |
| ENSG00000139433 | 8.282565319 | 7.679480043 | protein_coding | 12 | 110288959 | 110318293 | GLTP      |
| ENSG00000139436 | 7.612231145 | 7.699043321 | protein_coding | 12 | 110367607 | 110434194 | GIT2      |
| ENSG00000139437 | 7.478203418 | 7.485338407 | protein_coding | 12 | 110338069 | 110421646 | TCHP      |
| ENSG00000139438 | 5.485736881 | 4.826083323 | protein_coding | 12 | 110152033 | 110208312 | C12orf34  |
| ENSG00000139496 | 9.811006628 | 9.354625616 | protein_coding | 13 | 25875662  | 25923938  | NUPL1     |
| ENSG00000139505 | 8.582333986 | 8.418443943 | protein_coding | 13 | 25802307  | 25862147  | MTMR6     |
| ENSG00000139508 | 0.499066092 | 0           | protein_coding | 13 | 29274201  | 29293107  | SLC46A3   |
| ENSG00000139514 | 10.70232786 | 9.925997554 | protein_coding | 13 | 30083547  | 30169721  | SLC7A1    |
| ENSG00000139517 | 6.62865285  | 6.077857763 | protein_coding | 13 | 28120050  | 28194541  | LNX2      |
| ENSG00000139531 | 7.768062907 | 7.842771865 | protein_coding | 12 | 56390964  | 56400425  | SUOX      |
| ENSG00000139537 | 5.223818625 | 4.917990497 | protein_coding | 12 | 49297893  | 49325623  | CCDC65    |
| ENSG00000139540 | 2.671945279 | 2.420525079 | protein_coding | 12 | 56623833  | 56631630  | SLC39A5   |
| ENSG00000139546 | 8.536501169 | 8.863902898 | protein_coding | 12 | 53894705  | 53900215  | TARBP2    |
| ENSG00000139547 | 2.762599152 | 3.781359661 | protein_coding | 12 | 57345219  | 57353158  | RDH16     |
| ENSG00000139549 | 0.499066092 | 0.390640832 | protein_coding | 12 | 49483204  | 49488602  | DHH       |
| ENSG00000139567 | 4.19837882  | 3.570966319 | protein_coding | 12 | 52300692  | 52317145  | ACVRL1    |
| ENSG00000139572 | 1.960915222 | 0.950786998 | protein_coding | 12 | 54756229  | 54758271  | GPR84     |
| ENSG00000139574 | 4.568725997 | 4.903073497 | protein_coding | 12 | 53900472  | 53902004  | NPFF      |
| ENSG00000139579 | 9.223526019 | 8.93803753  | protein_coding | 12 | 56615799  | 56623638  | BPFC2B    |
| ENSG00000139597 | 3.335220907 | 3.411459265 | protein_coding | 13 | 32974861  | 33007091  | N4BP2L1   |
| ENSG00000139613 | 10.09943635 | 9.693826839 | protein_coding | 12 | 56556767  | 56583351  | SMARCC2   |
| ENSG00000139617 | 0.499066092 | 0.697730409 | protein_coding | 13 | 33006554  | 33054775  |           |
| ENSG00000139618 | 7.19863491  | 6.779278886 | protein_coding | 13 | 32889611  | 32973805  | BRCA2     |
| ENSG00000139620 | 7.530740159 | 7.591499486 | protein_coding | 12 | 49047184  | 49076021  | KANSL2    |
| ENSG00000139624 | 8.54291017  | 8.600524813 | protein_coding | 12 | 50523575  | 50561288  | CERS5     |
| ENSG00000139625 | 7.30049066  | 7.909600377 | protein_coding | 12 | 53874274  | 53893847  | MAP3K12   |
| ENSG00000139626 | 4.491309013 | 4.274079748 | protein_coding | 12 | 53585107  | 53601091  | ITGB7     |
| ENSG00000139629 | 8.748205354 | 6.136428444 | protein_coding | 12 | 51745682  | 51785436  | GALNT6    |
| ENSG00000139631 | 7.058051099 | 7.635032283 | protein_coding | 12 | 53551448  | 53575135  | CSAD      |
| ENSG00000139636 | 7.795160661 | 7.780879746 | protein_coding | 12 | 49490919  | 49504683  | LMBR1L    |
| ENSG00000139637 | 8.766120079 | 8.639296529 | protein_coding | 12 | 53693470  | 53700961  | C12orf10  |
| ENSG00000139641 | 10.91026098 | 10.70751691 | protein_coding | 12 | 56512034  | 56538457  | ESYT1     |
| ENSG00000139644 | 12.55630746 | 12.30100114 | protein_coding | 12 | 50101508  | 50158717  | TMBIM6    |
| ENSG00000139645 | 11.41206681 | 11.42098072 | protein_coding | 12 | 56631591  | 56652175  | ANKRD52   |
| ENSG00000139651 | 8.364450825 | 8.276635048 | protein_coding | 12 | 53574484  | 53583208  | ZNF740    |
| ENSG00000139656 | 0           | 0.697730409 | protein_coding | 13 | 44717679  | 44735393  | C13orf44  |
| ENSG00000139668 | 6.023726639 | 6.130036786 | protein_coding | 13 | 52158644  | 52334135  | WDFY2     |
| ENSG00000139675 | 4.230497448 | 4.048652948 | protein_coding | 13 | 53191605  | 53217919  | HNRNPA1L2 |
| ENSG00000139679 | 0.499066092 | 0           | protein_coding | 13 | 48963707  | 49018840  | LPAR6     |
| ENSG00000139684 | 8.33889698  | 8.073455769 | protein_coding | 13 | 47345391  | 47371367  | ESD       |
| ENSG00000139687 | 7.89873181  | 8.18248514  | protein_coding | 13 | 48877883  | 49056122  | RB1       |
| ENSG00000139697 | 9.804353406 | 9.534777296 | protein_coding | 12 | 123773656 | 123834988 | SBNO1     |
| ENSG00000139714 | 2.928422289 | 2.501982735 | protein_coding | 12 | 122089024 | 122110537 | MORN3     |
| ENSG00000139718 | 9.513500523 | 9.029304007 | protein_coding | 12 | 122242086 | 122270562 | SETD1B    |
| ENSG00000139719 | 6.335686705 | 6.50081754  | protein_coding | 12 | 122715292 | 122751068 | VPS33A    |
| ENSG00000139722 | 9.105088364 | 8.317991549 | protein_coding | 12 | 123349882 | 123380991 | VPS37B    |
| ENSG00000139725 | 5.575999561 | 4.17820932  | protein_coding | 12 | 122215664 | 122232261 | RHOF      |
| ENSG00000139726 | 9.69925397  | 9.621627484 | protein_coding | 12 | 123237321 | 123255611 | DENR      |
| ENSG00000139734 | 8.18144485  | 7.860254213 | protein_coding | 13 | 60239717  | 60738119  | DIAPH3    |
| ENSG00000139737 | 0.499066092 | 0           | protein_coding | 13 | 78272023  | 78338377  | SLAIN1    |
| ENSG00000139746 | 9.298353251 | 9.316433258 | protein_coding | 13 | 79885962  | 79980612  | RBM26     |
| ENSG00000139793 | 9.967488686 | 9.659288865 | protein_coding | 13 | 97873688  | 98046374  | MBNL2     |
| ENSG00000139797 | 6.489593565 | 6.544728831 | protein_coding | 13 | 98828039  | 98829519  | RNF113B   |
| ENSG00000139800 | 5.929039784 | 5.816437314 | protein_coding | 13 | 100615275 | 100624163 | ZIC5      |

|                 |             |             |                |    |           |           |           |
|-----------------|-------------|-------------|----------------|----|-----------|-----------|-----------|
| ENSG00000139826 | 6.782811835 | 7.016060809 | protein_coding | 13 | 108870727 | 108886603 | ABHD13    |
| ENSG00000139832 | 6.171673665 | 4.976162367 | protein_coding | 13 | 111175417 | 111214080 | RAB20     |
| ENSG00000139835 | 4.999881834 | 3.133298822 | protein_coding | 13 | 113978544 | 114018446 | GRTP1     |
| ENSG00000139842 | 9.729068359 | 9.595189186 | protein_coding | 13 | 113862552 | 113919399 | CUL4A     |
| ENSG00000139865 | 0           | 0.390640832 | protein_coding | 14 | 38065052  | 38510647  | TTC6      |
| ENSG00000139880 | 8.614637248 | 8.69123279  | protein_coding | 14 | 23516271  | 23526747  | CDH24     |
| ENSG00000139890 | 2.762599152 | 2.242360793 | protein_coding | 14 | 23352374  | 23356895  | REM2      |
| ENSG00000139899 | 4.923348194 | 6.535085617 | protein_coding | 14 | 24895738  | 24900160  | CBLN3     |
| ENSG00000139908 | 4.689181911 | 4.508954154 | protein_coding | 14 | 24674903  | 24677568  | TSSK4     |
| ENSG00000139910 | 4.712111592 | 6.192713747 | protein_coding | 14 | 26912299  | 27066960  | NOVA1     |
| ENSG00000139914 | 0.869158192 | 1.802319292 | protein_coding | 14 | 24600484  | 24602058  | FITM1     |
| ENSG00000139921 | 9.413872751 | 9.661506506 | protein_coding | 14 | 51706880  | 51722759  | TMX1      |
| ENSG00000139926 | 9.463702247 | 9.865723786 | protein_coding | 14 | 51955818  | 52197445  | FRMD6     |
| ENSG00000139946 | 0           | 0.390640832 | protein_coding | 14 | 56584532  | 56768244  | PELI2     |
| ENSG00000139970 | 0           | 0.390640832 | protein_coding | 14 | 60062694  | 60337684  | RTN1      |
| ENSG00000139971 | 2.928422289 | 4.65855978  | protein_coding | 14 | 58466453  | 58764857  | C14orf37  |
| ENSG00000139973 | 1.16343121  | 0           | protein_coding | 14 | 62453803  | 62568431  | SYT16     |
| ENSG00000139974 | 6.897280837 | 7.18590274  | protein_coding | 14 | 61447832  | 61550451  | SLC38A6   |
| ENSG00000139977 | 9.511051014 | 9.565299431 | protein_coding | 14 | 57857262  | 57882635  | NAA30     |
| ENSG00000139985 | 3.830412367 | 4.17820932  | protein_coding | 14 | 70924217  | 70926622  | ADAM21    |
| ENSG00000139988 | 2.35979773  | 2.652276565 | protein_coding | 14 | 68168603  | 68201169  | RDH12     |
| ENSG00000139990 | 9.832093067 | 10.09877829 | protein_coding | 14 | 69517598  | 69619867  | DCAF5     |
| ENSG00000139998 | 6.793601635 | 7.080460027 | protein_coding | 14 | 65412532  | 65439494  | RAB15     |
| ENSG00000140006 | 8.150302734 | 8.608592853 | protein_coding | 14 | 64063757  | 64108579  | WDR89     |
| ENSG00000140009 | 2.471521042 | 3.232099092 | protein_coding | 14 | 64550950  | 64804830  | ESR2      |
| ENSG00000140022 | 7.663128351 | 6.24096575  | protein_coding | 14 | 81727000  | 81902809  | STON2     |
| ENSG00000140025 | 6.573375019 | 6.45552765  | protein_coding | 14 | 90261013  | 90421121  | EFCAB11   |
| ENSG00000140030 | 0.499066092 | 0           | protein_coding | 14 | 88471468  | 88478419  | GPR65     |
| ENSG00000140043 | 6.188122351 | 6.475832214 | protein_coding | 14 | 74318547  | 74353530  | PTGR2     |
| ENSG00000140044 | 6.941611359 | 6.82352253  | protein_coding | 14 | 75894419  | 75940814  | JDP2      |
| ENSG00000140057 | 4.821592551 | 2.334191469 | protein_coding | 14 | 96858448  | 96955764  | AK7       |
| ENSG00000140090 | 7.04456449  | 6.911866869 | protein_coding | 14 | 92788925  | 92962596  | SLC24A4   |
| ENSG00000140092 | 1.616589159 | 2.501982735 | protein_coding | 14 | 92335756  | 92414331  | FBLN5     |
| ENSG00000140093 | 2.928422289 | 2.652276565 | protein_coding | 14 | 94749650  | 94759608  | SERPINA10 |
| ENSG00000140104 | 7.64536895  | 7.289906366 | protein_coding | 14 | 105452112 | 105476819 | C14orf79  |
| ENSG00000140105 | 11.72392003 | 11.09320008 | protein_coding | 14 | 100800125 | 100843142 | WARS      |
| ENSG00000140107 | 1.407729925 | 0.697730409 | protein_coding | 14 | 100789674 | 100796715 | SLC25A47  |
| ENSG00000140153 | 8.05038018  | 7.255086103 | protein_coding | 14 | 102605840 | 102691184 | WDR20     |
| ENSG00000140157 | 9.514316103 | 9.345689152 | protein_coding | 15 | 23004684  | 23034427  | NIPA2     |
| ENSG00000140181 | 7.842689815 | 8.724493    | pseudogene     | 15 | 23282281  | 23378228  | HERC2P2   |
| ENSG00000140199 | 6.554468172 | 6.332882496 | protein_coding | 15 | 34525460  | 34630261  | SLC12A6   |
| ENSG00000140254 | 2.847891871 | 2.652276565 | protein_coding | 15 | 45409569  | 45422136  | DUOXA1    |
| ENSG00000140259 | 8.910650905 | 9.060728822 | protein_coding | 15 | 44096690  | 44117000  | MFAP1     |
| ENSG00000140262 | 9.2686931   | 9.259011141 | protein_coding | 15 | 57210323  | 57591479  | TCF12     |
| ENSG00000140263 | 8.900704842 | 8.099860884 | protein_coding | 15 | 45315302  | 45369383  | SORD      |
| ENSG00000140264 | 10.3009932  | 10.88145436 | protein_coding | 15 | 44069285  | 44094787  | SERF2     |
| ENSG00000140265 | 7.928406768 | 7.541804862 | protein_coding | 15 | 43650370  | 43663223  | ZSCAN29   |
| ENSG00000140279 | 1.960915222 | 1.925536307 | protein_coding | 15 | 45384848  | 45406542  | DUOX2     |
| ENSG00000140280 | 5.660945913 | 5.317302248 | protein_coding | 15 | 52015208  | 52043782  | LYSMD2    |
| ENSG00000140284 | 4.618121645 | 4.15321211  | protein_coding | 15 | 50474393  | 50528592  | SLC27A2   |
| ENSG00000140285 | 0.869158192 | 1.802319292 | protein_coding | 15 | 49715293  | 50149346  | FGF7      |
| ENSG00000140297 | 0.499066092 | 1.802319292 | protein_coding | 15 | 59887074  | 59932438  | GCNT3     |
| ENSG00000140299 | 8.760631512 | 8.669360359 | protein_coding | 15 | 59951345  | 59981733  | BNIP2     |
| ENSG00000140307 | 7.787084643 | 8.194786822 | protein_coding | 15 | 59930261  | 59949740  | GTF2A2    |
| ENSG00000140319 | 10.19714397 | 10.53319908 | protein_coding | 15 | 40327940  | 40331389  | SRP14     |
| ENSG00000140320 | 8.629769183 | 8.184028599 | protein_coding | 15 | 40731920  | 40760441  | BAHD1     |
| ENSG00000140323 | 5.60078458  | 5.212303549 | protein_coding | 15 | 40650436  | 40663257  | DISP2     |
| ENSG00000140326 | 7.792473675 | 7.664078611 | protein_coding | 15 | 43015757  | 43029417  | CDAN1     |
| ENSG00000140332 | 9.67684603  | 8.791837833 | protein_coding | 15 | 70340129  | 70390515  | TLE3      |
| ENSG00000140350 | 10.64203813 | 10.30434431 | protein_coding | 15 | 69039580  | 69113236  | ANP32A    |
| ENSG00000140365 | 8.631273684 | 9.350507971 | protein_coding | 15 | 75628232  | 75634268  | COMMD4    |
| ENSG00000140367 | 7.60612345  | 7.726841127 | protein_coding | 15 | 76135622  | 76193419  | UBE2Q2    |
| ENSG00000140368 | 1.799000381 | 2.420525079 | protein_coding | 15 | 77285700  | 77329673  | PSTPIP1   |

|                 |             |             |                |    |           |           |          |
|-----------------|-------------|-------------|----------------|----|-----------|-----------|----------|
| ENSG00000140374 | 9.790954202 | 9.935650135 | protein_coding | 15 | 76507696  | 76603813  | ETFA     |
| ENSG00000140379 | 1.616589159 | 1.16600992  | protein_coding | 15 | 80253231  | 80263788  | BCL2A1   |
| ENSG00000140382 | 8.705994399 | 8.598211347 | protein_coding | 15 | 77712754  | 77777949  | HMG20A   |
| ENSG00000140386 | 6.567100227 | 6.646756201 | protein_coding | 15 | 76640526  | 77197785  | SCAPER   |
| ENSG00000140391 | 10.38097398 | 10.60984308 | protein_coding | 15 | 77336359  | 77376326  | TSPAN3   |
| ENSG00000140395 | 8.502378699 | 8.667154767 | protein_coding | 15 | 78570177  | 78592136  | WDR61    |
| ENSG00000140396 | 8.272959095 | 8.154416734 | protein_coding | 8  | 71021997  | 71316040  | NCOA2    |
| ENSG00000140398 | 6.086493765 | 5.855704078 | protein_coding | 15 | 75639296  | 75647592  | NEIL1    |
| ENSG00000140400 | 9.392739397 | 9.669792433 | protein_coding | 15 | 75648133  | 75660971  | MAN2C1   |
| ENSG00000140403 | 7.296703257 | 7.512619979 | protein_coding | 15 | 78556428  | 78574538  | DNAJA4   |
| ENSG00000140406 | 7.974178365 | 7.591499486 | protein_coding | 15 | 81293295  | 81296342  | MESDC1   |
| ENSG00000140416 | 10.17048758 | 11.59943942 | protein_coding | 15 | 63334831  | 63364114  | TPM1     |
| ENSG00000140443 | 9.91224858  | 9.722786654 | protein_coding | 15 | 99192200  | 99507759  | IGF1R    |
| ENSG00000140450 | 6.400645076 | 7.41347308  | protein_coding | 15 | 98462784  | 98517068  | ARRDC4   |
| ENSG00000140451 | 7.663128351 | 7.971683681 | protein_coding | 15 | 65107831  | 65117867  | PIF1     |
| ENSG00000140455 | 8.389559911 | 8.46235258  | protein_coding | 15 | 63796793  | 63886839  | USP3     |
| ENSG00000140459 | 2.471521042 | 1.16600992  | protein_coding | 15 | 74630100  | 74660081  | CYP11A1  |
| ENSG00000140463 | 6.640654398 | 6.854868327 | protein_coding | 15 | 72978527  | 73030817  | BBS4     |
| ENSG00000140464 | 10.81550688 | 10.94359578 | protein_coding | 15 | 74287014  | 74340153  | PML      |
| ENSG00000140465 | 4.165528823 | 6.155435249 | protein_coding | 15 | 75011883  | 75017951  | CYP1A1   |
| ENSG00000140470 | 1.16343121  | 0.950786998 | protein_coding | 15 | 100511794 | 100882210 | ADAMTS17 |
| ENSG00000140471 | 6.482942724 | 6.642271819 | protein_coding | 15 | 101099574 | 101143435 | LINS     |
| ENSG00000140474 | 8.023133844 | 8.66273344  | protein_coding | 15 | 75128457  | 75135687  | ULK3     |
| ENSG00000140479 | 1.407729925 | 0.697730409 | protein_coding | 15 | 101840818 | 102065405 | PCSK6    |
| ENSG00000140481 | 4.409500985 | 1.802319292 | protein_coding | 15 | 74509613  | 74628813  | CCDC33   |
| ENSG00000140497 | 9.263851576 | 9.075772566 | protein_coding | 15 | 75136071  | 75165706  | SCAMP2   |
| ENSG00000140505 | 0.499066092 | 0.697730409 | protein_coding | 15 | 75041185  | 75048543  | CYP1A2   |
| ENSG00000140506 | 0.499066092 | 0           | protein_coding | 15 | 75105057  | 75118099  | LMAN1L   |
| ENSG00000140511 | 6.634666104 | 6.831423059 | protein_coding | 15 | 89420519  | 89438857  | HAPLN3   |
| ENSG00000140519 | 0.499066092 | 0           | protein_coding | 15 | 89998680  | 90039844  | RHCG     |
| ENSG00000140521 | 9.615838797 | 9.697613846 | protein_coding | 15 | 89859534  | 89878092  | POLG     |
| ENSG00000140522 | 0           | 0.390640832 | protein_coding | 15 | 89753100  | 89764982  | RLBP1    |
| ENSG00000140525 | 9.609746388 | 9.84538481  | protein_coding | 15 | 89787180  | 89860492  | FANCI    |
| ENSG00000140526 | 9.158235462 | 8.647151213 | protein_coding | 15 | 89630690  | 89745591  | ABHD2    |
| ENSG00000140527 | 2.238690726 | 2.334191469 | protein_coding | 15 | 90234028  | 90286869  | WDR93    |
| ENSG00000140534 | 8.433338631 | 8.557113361 | protein_coding | 15 | 90118713  | 90174287  | C15orf42 |
| ENSG00000140538 | 1.616589159 | 0.390640832 | protein_coding | 15 | 88402982  | 88799999  | NTRK3    |
| ENSG00000140543 | 5.512107582 | 5.466810074 | protein_coding | 15 | 89054790  | 89089906  | DET1     |
| ENSG00000140545 | 7.834876234 | 8.434094156 | protein_coding | 15 | 89441916  | 89456642  | MFGE8    |
| ENSG00000140548 | 7.341508784 | 7.219404604 | protein_coding | 15 | 90544624  | 90625438  | ZNF710   |
| ENSG00000140553 | 9.972838789 | 9.972288065 | protein_coding | 15 | 91471728  | 91497323  | UNC45A   |
| ENSG00000140563 | 2.238690726 | 0           | protein_coding | 15 | 94774767  | 95023632  | MCTP2    |
| ENSG00000140564 | 10.44952202 | 10.54165143 | protein_coding | 15 | 91411822  | 91426688  | FURIN    |
| ENSG00000140575 | 11.4092195  | 11.47099045 | protein_coding | 15 | 90931450  | 91045475  | IQGAP1   |
| ENSG00000140577 | 8.614637248 | 8.565427152 | protein_coding | 15 | 91073157  | 91188577  | CRTC3    |
| ENSG00000140598 | 7.494827594 | 7.969895325 | protein_coding | 15 | 82422571  | 82555104  | EFTUD1   |
| ENSG00000140612 | 9.557686483 | 9.94751216  | protein_coding | 15 | 85212775  | 85259947  | SEC11A   |
| ENSG00000140623 | 0           | 0.390640832 | protein_coding | 16 | 4827670   | 4838522   | 12-sep   |
| ENSG00000140632 | 9.532948302 | 9.253876247 | protein_coding | 16 | 4853204   | 4897343   | GLYR1    |
| ENSG00000140650 | 7.808521034 | 7.637287497 | protein_coding | 16 | 8882680   | 8943188   | PMM2     |
| ENSG00000140675 | 0.869158192 | 0           | protein_coding | 16 | 31494323  | 31502181  | SLC5A2   |
| ENSG00000140678 | 3.911897206 | 3.87606762  | protein_coding | 16 | 31366455  | 31394318  | ITGAX    |
| ENSG00000140682 | 8.18144485  | 8.705274089 | protein_coding | 16 | 31482906  | 31489281  | TGFB111  |
| ENSG00000140688 | 8.830404061 | 8.849385973 | protein_coding | 16 | 31500792  | 31520630  | C16orf58 |
| ENSG00000140691 | 7.754320745 | 7.885138265 | protein_coding | 16 | 31469401  | 31478487  | ARMC5    |
| ENSG00000140694 | 9.185117095 | 9.370301936 | protein_coding | 16 | 14529558  | 14726585  | PARN     |
| ENSG00000140718 | 8.510576602 | 8.727671407 | protein_coding | 16 | 53737875  | 54155853  | FTO      |
| ENSG00000140740 | 10.54040657 | 10.64976544 | protein_coding | 16 | 21963981  | 21994981  | UQCRC2   |
| ENSG00000140743 | 9.237422823 | 9.120790981 | protein_coding | 16 | 22357257  | 22448486  | CDR2     |
| ENSG00000140749 | 2.35979773  | 1.925536307 | protein_coding | 16 | 21652609  | 21663981  | IGSF6    |
| ENSG00000140750 | 9.592086026 | 9.581200526 | protein_coding | 16 | 24930710  | 25026675  | ARHGAP17 |
| ENSG00000140795 | 1.16343121  | 2.144285137 | protein_coding | 16 | 46740891  | 46824319  | MYLK3    |
| ENSG00000140798 | 0           | 0.390640832 | protein_coding | 16 | 48116884  | 48189929  | ABCC12   |

|                 |             |             |                |    |          |          |          |
|-----------------|-------------|-------------|----------------|----|----------|----------|----------|
| ENSG00000140807 | 4.230497448 | 4.226940739 | protein_coding | 16 | 50582241 | 50670647 | NKD1     |
| ENSG00000140829 | 10.21581552 | 10.28721257 | protein_coding | 16 | 72127461 | 72146811 | DHX38    |
| ENSG00000140830 | 7.123655438 | 7.002128877 | protein_coding | 16 | 72078188 | 72128330 | TXNL4B   |
| ENSG00000140832 | 4.593635215 | 1.518964905 | protein_coding | 16 | 71660064 | 71676017 | MARVELD3 |
| ENSG00000140835 | 4.66588819  | 5.045726316 | protein_coding | 16 | 71560036 | 71574146 | CHST4    |
| ENSG00000140836 | 9.698536539 | 9.638612448 | protein_coding | 16 | 72816784 | 73093597 | ZFH33    |
| ENSG00000140839 | 0.869158192 | 0           | protein_coding | 16 | 74442529 | 74455649 | CLEC18B  |
| ENSG00000140848 | 9.68845487  | 9.816320232 | protein_coding | 16 | 57126449 | 57181878 | CPNE2    |
| ENSG00000140853 | 9.199386995 | 10.2975873  | protein_coding | 16 | 57023397 | 57117443 | NLRC5    |
| ENSG00000140854 | 9.258020218 | 9.856074312 | protein_coding | 16 | 57769642 | 57791162 | KATNB1   |
| ENSG00000140859 | 10.21932096 | 10.67906696 | protein_coding | 16 | 57792129 | 57896957 | KIFC3    |
| ENSG00000140873 | 0.869158192 | 0.950786998 | protein_coding | 16 | 77281710 | 77469011 | ADAMTS18 |
| ENSG00000140876 | 4.131913373 | 4.448594745 | protein_coding | 16 | 77756411 | 77776157 | NUDT7    |
| ENSG00000140905 | 7.73205733  | 7.88892877  | protein_coding | 16 | 81115566 | 81130008 | GCSH     |
| ENSG00000140931 | 8.616157604 | 9.093127603 | protein_coding | 16 | 66637777 | 66647795 | CMTM3    |
| ENSG00000140932 | 0.499066092 | 1.16600992  | protein_coding | 16 | 66613351 | 66622178 | CMTM2    |
| ENSG00000140937 | 7.834876234 | 8.390640789 | protein_coding | 16 | 64977656 | 65160015 | CDH11    |
| ENSG00000140939 | 7.943018447 | 8.262094789 | protein_coding | 16 | 67204057 | 67209643 | NOL3     |
| ENSG00000140941 | 10.14648923 | 10.25489893 | protein_coding | 16 | 87417601 | 87438385 | MAP1LC3B |
| ENSG00000140943 | 11.32944272 | 11.58957402 | protein_coding | 16 | 84087368 | 84150511 | MBTPS1   |
| ENSG00000140945 | 0.499066092 | 0.390640832 | protein_coding | 16 | 82660408 | 83830204 | CDH13    |
| ENSG00000140948 | 9.221529789 | 9.124814753 | protein_coding | 16 | 87439852 | 87525651 | ZCCHC14  |
| ENSG00000140950 | 9.250208226 | 8.749726325 | protein_coding | 16 | 84511681 | 84587639 | KIAA1609 |
| ENSG00000140961 | 7.23866569  | 6.79148052  | protein_coding | 16 | 83981887 | 83999937 | OSGIN1   |
| ENSG00000140968 | 3.077135474 | 2.334191469 | protein_coding | 16 | 85932409 | 85956197 | IRF8     |
| ENSG00000140983 | 10.20474267 | 10.276401   | protein_coding | 16 | 718086   | 724174   | RHOT2    |
| ENSG00000140986 | 3.004694206 | 2.420525079 | protein_coding | 16 | 1993975  | 2007607  | RPL3L    |
| ENSG00000140987 | 7.891216707 | 7.881337775 | protein_coding | 16 | 3432085  | 3451030  | ZNF434   |
| ENSG00000140988 | 12.38963843 | 12.49464367 | protein_coding | 16 | 2012053  | 2014861  | RPS2     |
| ENSG00000140990 | 9.435562348 | 9.881029944 | protein_coding | 16 | 2009509  | 2011976  | NDUFB10  |
| ENSG00000140992 | 8.891945431 | 8.725553248 | protein_coding | 16 | 2587965  | 2653189  | PDPK1    |
| ENSG00000140993 | 7.615275323 | 8.130601896 | protein_coding | 16 | 3340527  | 3355645  | TIGD7    |
| ENSG00000140995 | 8.457286611 | 9.208338404 | protein_coding | 16 | 90014333 | 90034468 | DEF8     |
| ENSG00000141002 | 10.14121895 | 10.58989654 | protein_coding | 16 | 89940000 | 89984641 | TCF25    |
| ENSG00000141012 | 9.409495425 | 9.53960799  | protein_coding | 16 | 88880142 | 88923378 | GALNS    |
| ENSG00000141013 | 7.402691859 | 7.426571535 | protein_coding | 16 | 90086037 | 90111383 | GAS8     |
| ENSG00000141026 | 7.787084643 | 8.17474298  | protein_coding | 17 | 17380300 | 17396535 | MED9     |
| ENSG00000141027 | 10.8250701  | 11.23303133 | protein_coding | 17 | 15934718 | 16119010 | NCOR1    |
| ENSG00000141028 | 0.499066092 | 1.353254395 | lincRNA        | 17 | 13927802 | 13928991 |          |
| ENSG00000141030 | 9.93557361  | 10.62951761 | protein_coding | 17 | 17150134 | 17184607 | COPS3    |
| ENSG00000141034 | 8.164919416 | 8.634788863 | protein_coding | 17 | 17942736 | 17971718 | C17orf39 |
| ENSG00000141040 | 6.846372398 | 7.541804862 | protein_coding | 17 | 16454701 | 16472520 | ZNF287   |
| ENSG00000141048 | 0           | 0.390640832 | protein_coding | 17 | 10346607 | 10372876 | MYH4     |
| ENSG00000141068 | 8.915598341 | 8.35682763  | protein_coding | 17 | 25783670 | 25953461 | KSR1     |
| ENSG00000141076 | 10.21781967 | 10.28289766 | protein_coding | 16 | 69165194 | 69202941 | CIRH1A   |
| ENSG00000141084 | 8.724437638 | 8.89344947  | protein_coding | 16 | 67757005 | 67840555 | RANBP10  |
| ENSG00000141086 | 4.962122459 | 4.406904905 | protein_coding | 16 | 67963473 | 67965770 | CTRL     |
| ENSG00000141098 | 7.72361917  | 8.013952351 | protein_coding | 16 | 67708436 | 67753324 | GFOD2    |
| ENSG00000141101 | 9.733277703 | 9.768254884 | protein_coding | 16 | 69775770 | 69788843 | NOB1     |
| ENSG00000141127 | 8.582333986 | 9.132828786 | protein_coding | 17 | 18743398 | 18834581 | PRPSAP2  |
| ENSG00000141140 | 10.08248848 | 9.790209352 | protein_coding | 17 | 34851482 | 34891305 | MYO19    |
| ENSG00000141141 | 8.833021386 | 8.787783083 | protein_coding | 17 | 35969826 | 36003493 | DDX52    |
| ENSG00000141150 | 0.869158192 | 0           | protein_coding | 17 | 34058679 | 34070540 | RASL10B  |
| ENSG00000141179 | 7.680671792 | 7.460081189 | protein_coding | 17 | 53828356 | 53854748 | PCTP     |
| ENSG00000141194 | 0           | 0.390640832 | protein_coding | 17 | 56232494 | 56233517 | OR4D1    |
| ENSG00000141198 | 8.16075831  | 7.756190105 | protein_coding | 17 | 52978052 | 53039328 | TOM1L1   |
| ENSG00000141200 | 0           | 0.390640832 | protein_coding | 17 | 51900239 | 51902573 | KIF2B    |
| ENSG00000141219 | 7.575190993 | 8.196317182 | protein_coding | 17 | 71228372 | 71245091 | C17orf80 |
| ENSG00000141232 | 8.307246212 | 7.694718794 | protein_coding | 17 | 48939584 | 48945339 | TOB1     |
| ENSG00000141252 | 9.600559263 | 9.580028658 | protein_coding | 17 | 411908   | 618096   | VPS53    |
| ENSG00000141258 | 9.645920794 | 10.0955015  | protein_coding | 17 | 2240806  | 2284344  | SGSM2    |
| ENSG00000141279 | 10.11080508 | 9.791222404 | protein_coding | 17 | 45600306 | 45700642 | NPEPPS   |
| ENSG00000141294 | 3.989024711 | 4.29708397  | protein_coding | 17 | 45908993 | 45915077 | LRRC46   |

|                 |             |             |                |    |          |          |          |
|-----------------|-------------|-------------|----------------|----|----------|----------|----------|
| ENSG00000141295 | 7.657232808 | 7.151604372 | protein_coding | 17 | 45915049 | 45918699 | SCRN2    |
| ENSG00000141298 | 8.536501169 | 8.21757351  | protein_coding | 17 | 27952956 | 28257170 | SSH2     |
| ENSG00000141314 | 0           | 0.697730409 | protein_coding | 17 | 30593195 | 30651680 | RHBDL3   |
| ENSG00000141337 | 6.283060568 | 6.89311646  | protein_coding | 17 | 66255323 | 66418872 | ARSG     |
| ENSG00000141349 | 9.267726094 | 9.643108201 | protein_coding | 17 | 42148098 | 42153711 | G6PC3    |
| ENSG00000141367 | 12.60784325 | 12.43001577 | protein_coding | 17 | 57697219 | 57773671 | CLTC     |
| ENSG00000141371 | 0.869158192 | 1.353254395 | protein_coding | 17 | 58469790 | 58508782 | C17orf64 |
| ENSG00000141376 | 7.106450572 | 7.616862529 | protein_coding | 17 | 58755172 | 59470198 | BCAS3    |
| ENSG00000141378 | 8.041355121 | 8.432796436 | protein_coding | 17 | 57774667 | 57784987 | PTRH2    |
| ENSG00000141380 | 9.560058142 | 9.718000208 | protein_coding | 18 | 23596219 | 23671164 | SS18     |
| ENSG00000141384 | 7.847875458 | 7.752033772 | protein_coding | 18 | 23806409 | 23971642 | TAF4B    |
| ENSG00000141385 | 9.868268606 | 9.764649066 | protein_coding | 18 | 12328943 | 12377253 | AFG3L2   |
| ENSG00000141391 | 4.689181911 | 4.777836593 | protein_coding | 18 | 12407895 | 12432234 | SLMO1    |
| ENSG00000141401 | 9.92702399  | 8.748683701 | protein_coding | 18 | 11981427 | 12030876 | IMPA2    |
| ENSG00000141404 | 4.131913373 | 3.845183986 | protein_coding | 18 | 11689184 | 11885684 | GNAL     |
| ENSG00000141424 | 9.657780134 | 9.917208266 | protein_coding | 18 | 33688495 | 33709357 | SLC39A6  |
| ENSG00000141425 | 9.12764907  | 8.915915748 | protein_coding | 18 | 33569787 | 33647539 | RPRD1A   |
| ENSG00000141428 | 6.522395495 | 7.0637896   | protein_coding | 18 | 33552046 | 33559241 | C18orf21 |
| ENSG00000141429 | 9.845117281 | 9.862353807 | protein_coding | 18 | 33161003 | 33291798 | GALNT1   |
| ENSG00000141431 | 0.499066092 | 0           | protein_coding | 18 | 31158541 | 31327377 | ASXL3    |
| ENSG00000141434 | 1.16343121  | 0.390640832 | protein_coding | 18 | 29769987 | 29800364 | MEP1B    |
| ENSG00000141437 | 0           | 0.390640832 | protein_coding | 18 | 29339525 | 29340843 | MCART2   |
| ENSG00000141441 | 7.50471092  | 6.881748114 | protein_coding | 18 | 29843506 | 30050447 | FAM59A   |
| ENSG00000141446 | 8.002356002 | 8.114504097 | protein_coding | 18 | 19109264 | 19180845 | ESCO1    |
| ENSG00000141447 | 8.815923273 | 8.524589435 | protein_coding | 18 | 21742008 | 21977823 | OSBPL1A  |
| ENSG00000141448 | 8.649206367 | 8.40394723  | protein_coding | 18 | 19749404 | 19782491 | GATA6    |
| ENSG00000141449 | 6.592037289 | 6.795524906 | protein_coding | 18 | 18822203 | 19102791 | GREB1L   |
| ENSG00000141452 | 7.959880444 | 7.926295939 | protein_coding | 18 | 21083462 | 21111771 | C18orf8  |
| ENSG00000141456 | 11.15842886 | 11.33189317 | protein_coding | 17 | 4574680  | 4607632  |          |
| ENSG00000141458 | 10.04007652 | 9.611339686 | protein_coding | 18 | 21111401 | 21166451 | NPC1     |
| ENSG00000141469 | 0.499066092 | 0           | protein_coding | 18 | 43304092 | 43332485 | SLC14A1  |
| ENSG00000141480 | 9.355904607 | 9.822279296 | protein_coding | 17 | 4613784  | 4624795  | ARRB2    |
| ENSG00000141497 | 2.10647801  | 1.353254395 | protein_coding | 17 | 4643319  | 4649411  | ZMYND15  |
| ENSG00000141499 | 9.151960225 | 9.546823838 | protein_coding | 17 | 7589389  | 7606820  | WRAP53   |
| ENSG00000141503 | 11.34740348 | 11.53119713 | protein_coding | 17 | 4736635  | 4801355  | MINK1    |
| ENSG00000141504 | 8.489164384 | 9.823270084 | protein_coding | 17 | 7529552  | 7531194  | SAT2     |
| ENSG00000141505 | 3.274897671 | 4.021284656 | protein_coding | 17 | 7076750  | 7082883  | ASGR1    |
| ENSG00000141506 | 3.004694206 | 4.448594745 | protein_coding | 17 | 8782228  | 8869024  | PIK3R5   |
| ENSG00000141510 | 12.28061402 | 12.51003135 | protein_coding | 17 | 7565097  | 7590856  | TP53     |
| ENSG00000141519 | 5.207774174 | 5.32851069  | protein_coding | 17 | 78010435 | 78074412 | CCDC40   |
| ENSG00000141522 | 11.93172359 | 11.58738872 | protein_coding | 17 | 79825598 | 79829282 | ARHGDI A |
| ENSG00000141524 | 7.161632221 | 3.453019579 | protein_coding | 17 | 76108999 | 76128488 | TMC6     |
| ENSG00000141526 | 11.44921933 | 11.46972551 | protein_coding | 17 | 80186293 | 80197369 | SLC16A3  |
| ENSG00000141527 | 5.729976786 | 5.536128679 | protein_coding | 17 | 78152274 | 78182855 | CARD14   |
| ENSG00000141540 | 7.923503136 | 8.457255683 | protein_coding | 17 | 72209653 | 72258155 | TTYH2    |
| ENSG00000141542 | 5.707331524 | 5.776071827 | protein_coding | 17 | 80614944 | 80656598 | RAB40B   |
| ENSG00000141543 | 9.878440025 | 9.829693678 | protein_coding | 17 | 78109013 | 78120982 | EIF4A3   |
| ENSG00000141551 | 9.335744919 | 9.130429247 | protein_coding | 17 | 80202246 | 80231576 | CSNK1D   |
| ENSG00000141552 | 8.826469148 | 9.150304507 | protein_coding | 17 | 79849599 | 79858363 | ANAPC11  |
| ENSG00000141556 | 9.832747078 | 9.651500164 | protein_coding | 17 | 80709940 | 80914691 | TBCD     |
| ENSG00000141560 | 8.12275821  | 8.176294739 | protein_coding | 17 | 80674582 | 80685892 | FN3KRP   |
| ENSG00000141562 | 8.12703021  | 8.605140645 | protein_coding | 17 | 80416060 | 80446141 | NARF     |
| ENSG00000141564 | 9.683387493 | 9.467928508 | protein_coding | 17 | 78518619 | 78940173 | RPTOR    |
| ENSG00000141568 | 9.249228746 | 8.936206949 | protein_coding | 17 | 80477589 | 80562483 | FOXK2    |
| ENSG00000141569 | 9.116949866 | 9.326251289 | protein_coding | 17 | 73885041 | 73893084 | TRIM65   |
| ENSG00000141570 | 6.328285199 | 6.077857763 | protein_coding | 17 | 77765931 | 77775482 | CBX8     |
| ENSG00000141574 | 5.40360309  | 5.792353798 | protein_coding | 17 | 80278900 | 80291921 | SECTM1   |
| ENSG00000141576 | 5.360713447 | 5.112089758 | protein_coding | 17 | 74138534 | 74236390 | RNF157   |
| ENSG00000141577 | 7.993024472 | 7.632773539 | protein_coding | 17 | 79163393 | 79196799 | AZ11     |
| ENSG00000141579 | 2.671945279 | 1.667587519 | protein_coding | 17 | 80787311 | 80797931 | ZNF750   |
| ENSG00000141580 | 9.524067267 | 9.606743677 | protein_coding | 17 | 80572438 | 80606411 | WDR45L   |
| ENSG00000141582 | 8.447071828 | 7.892709342 | protein_coding | 17 | 77806955 | 77813228 | CBX4     |
| ENSG00000141622 | 4.77879189  | 2.721932731 | protein_coding | 18 | 43914187 | 44040783 | RNF165   |

|                 |             |             |                |    |           |           |           |
|-----------------|-------------|-------------|----------------|----|-----------|-----------|-----------|
| ENSG00000141627 | 8.70742151  | 8.891561392 | protein_coding | 18 | 46570172  | 46987079  | DYM       |
| ENSG00000141642 | 5.175139844 | 4.932754837 | protein_coding | 18 | 48494386  | 48514491  | ELAC1     |
| ENSG00000141644 | 9.179986301 | 9.379761309 | protein_coding | 18 | 47793887  | 47808144  | MBD1      |
| ENSG00000141646 | 9.342189974 | 9.334613891 | protein_coding | 18 | 48494410  | 48611415  | SMAD4     |
| ENSG00000141655 | 7.161632221 | 7.495318771 | protein_coding | 18 | 59992520  | 60054899  | TNFRSF11A |
| ENSG00000141664 | 8.135536446 | 8.288162655 | protein_coding | 18 | 60190658  | 60245793  | ZCCHC2    |
| ENSG00000141665 | 2.471521042 | 3.781359661 | protein_coding | 18 | 71740588  | 71815100  | FBXO15    |
| ENSG00000141682 | 9.125515568 | 8.865827498 | protein_coding | 18 | 57567180  | 57571538  | PMAIP1    |
| ENSG00000141696 | 9.021506037 | 8.980400792 | protein_coding | 17 | 39958199  | 39968855  | LEPREL4   |
| ENSG00000141698 | 9.285033801 | 9.43525094  | protein_coding | 17 | 39981335  | 39992523  | NT5C3L    |
| ENSG00000141699 | 9.407740769 | 8.935290787 | protein_coding | 17 | 40731528  | 40761445  | FAM134C   |
| ENSG00000141720 | 9.475476535 | 9.209096633 | protein_coding | 17 | 36921942  | 36956158  | PIP4K2B   |
| ENSG00000141736 | 9.940436455 | 9.632972982 | protein_coding | 17 | 37844393  | 37884915  | ERBB2     |
| ENSG00000141738 | 8.217949183 | 6.733635362 | protein_coding | 17 | 37894187  | 37903545  | GRB7      |
| ENSG00000141741 | 7.96466218  | 8.104758487 | protein_coding | 17 | 37885409  | 37887040  | MIEN1     |
| ENSG00000141744 | 0           | 0.697730409 | protein_coding | 17 | 37824234  | 37826728  | PNMT      |
| ENSG00000141748 | 1.407729925 | 1.16600992  | protein_coding | 17 | 37313147  | 37323318  | ARL5C     |
| ENSG00000141750 | 0.499066092 | 1.16600992  | protein_coding | 17 | 37366789  | 37382040  | STAC2     |
| ENSG00000141753 | 7.182306324 | 5.700439663 | protein_coding | 17 | 38599702  | 38613983  | IGFBP4    |
| ENSG00000141756 | 10.68033139 | 11.536644   | protein_coding | 17 | 39968962  | 39979465  | FKBP10    |
| ENSG00000141759 | 8.738466022 | 8.966118473 | protein_coding | 18 | 77732869  | 77748532  | TXNL4A    |
| ENSG00000141837 | 6.228441838 | 6.775188634 | protein_coding | 19 | 13317256  | 13617274  | CACNA1A   |
| ENSG00000141854 | 3.393122761 | 3.64455972  | protein_coding | 19 | 14183348  | 14185873  |           |
| ENSG00000141858 | 9.622662143 | 9.509147322 | protein_coding | 19 | 14198652  | 14201848  | SAMD1     |
| ENSG00000141867 | 11.93477291 | 11.74887797 | protein_coding | 19 | 15348301  | 15443356  | BRD4      |
| ENSG00000141873 | 9.639206824 | 9.751176567 | protein_coding | 19 | 2732202   | 2740074   | SLC39A3   |
| ENSG00000141905 | 10.27620418 | 10.06147816 | protein_coding | 19 | 3359616   | 3463603   | NFIC      |
| ENSG00000141933 | 7.292905885 | 7.877527247 | protein_coding | 19 | 507497    | 519653    | TPGS1     |
| ENSG00000141934 | 10.03440201 | 9.858975937 | protein_coding | 19 | 281048    | 291435    | PPAP2C    |
| ENSG00000141956 | 7.666067113 | 7.887034762 | protein_coding | 21 | 43218385  | 43299591  | PRDM15    |
| ENSG00000141959 | 11.12384425 | 11.67547565 | protein_coding | 21 | 45719934  | 45747259  | PFKL      |
| ENSG00000141965 | 9.569505979 | 9.464757353 | protein_coding | 19 | 4791728   | 4795571   | FEM1A     |
| ENSG00000141968 | 7.850461307 | 7.946442679 | protein_coding | 19 | 6772722   | 6857371   | VAV1      |
| ENSG00000141971 | 9.461166635 | 9.522629316 | protein_coding | 19 | 17516503  | 17544533  | FAM125A   |
| ENSG00000141977 | 2.762599152 | 3.183544561 | protein_coding | 19 | 16272179  | 16284286  | CIB3      |
| ENSG00000141979 | 0.869158192 | 0.950786998 | protein_coding | 19 | 16589875  | 16739015  | CALR3     |
| ENSG00000141985 | 11.28664373 | 11.58271565 | protein_coding | 19 | 4360370   | 4400522   | SH3GL1    |
| ENSG00000141994 | 9.379372099 | 9.757410281 | protein_coding | 19 | 5785155   | 5791249   | DUS3L     |
| ENSG00000142002 | 11.49062868 | 10.89329685 | protein_coding | 19 | 4675238   | 4723875   | DPP9      |
| ENSG00000142039 | 7.627388205 | 7.370740503 | protein_coding | 19 | 41816094  | 41830785  | CCDC97    |
| ENSG00000142046 | 4.097495944 | 4.528525526 | protein_coding | 19 | 41856816  | 41889988  | TMEM91    |
| ENSG00000142065 | 5.255381949 | 5.496926774 | protein_coding | 19 | 36827162  | 36870078  | ZFP14     |
| ENSG00000142082 | 7.813830732 | 7.699043321 | protein_coding | 11 | 215458    | 236931    | SIRT3     |
| ENSG00000142089 | 11.96252829 | 12.66465318 | protein_coding | 11 | 319669    | 321340    | IFITM3    |
| ENSG00000142102 | 9.288851923 | 9.790715967 | protein_coding | 11 | 289135    | 296107    | ATHL1     |
| ENSG00000142156 | 10.51821653 | 11.39655904 | protein_coding | 21 | 47401651  | 47424964  | COL6A1    |
| ENSG00000142166 | 8.813274715 | 9.05483585  | protein_coding | 21 | 34696734  | 34732168  | IFNAR1    |
| ENSG00000142168 | 9.941649609 | 10.35626402 | protein_coding | 21 | 33031935  | 33041244  | SOD1      |
| ENSG00000142173 | 8.918065711 | 9.564114571 | protein_coding | 21 | 47518011  | 47552763  | COL6A2    |
| ENSG00000142178 | 10.87830713 | 9.177677745 | protein_coding | 21 | 44834395  | 44847008  | SIK1      |
| ENSG00000142182 | 1.616589159 | 2.039052734 | protein_coding | 21 | 45666222  | 45682099  | DNMT3L    |
| ENSG00000142185 | 7.214780754 | 9.305839261 | protein_coding | 21 | 45770046  | 45862964  | TRPM2     |
| ENSG00000142186 | 10.33000324 | 10.37564205 | protein_coding | 11 | 65292548  | 65306175  | SCYL1     |
| ENSG00000142188 | 6.509364082 | 7.249200135 | protein_coding | 21 | 34804792  | 34853499  | TMEM50B   |
| ENSG00000142192 | 12.53526683 | 12.89119321 | protein_coding | 21 | 27252861  | 27543446  | APP       |
| ENSG00000142197 | 7.115078652 | 6.408769788 | protein_coding | 21 | 37529080  | 37711195  | DOPEY2    |
| ENSG00000142207 | 9.561637084 | 9.078264676 | protein_coding | 21 | 33683329  | 33765335  | URB1      |
| ENSG00000142208 | 11.21068739 | 10.4017445  | protein_coding | 14 | 105235686 | 105262088 | AKT1      |
| ENSG00000142227 | 9.296457985 | 9.908831886 | protein_coding | 19 | 48828629  | 48833810  | EMP3      |
| ENSG00000142230 | 10.68721878 | 10.81128162 | protein_coding | 19 | 47634080  | 47713892  | SAE1      |
| ENSG00000142233 | 4.543379137 | 3.87606762  | protein_coding | 19 | 49164666  | 49176264  | NTN5      |
| ENSG00000142235 | 7.153278907 | 5.212303549 | protein_coding | 19 | 48988528  | 49016446  | LMTK3     |
| ENSG00000142252 | 7.527512071 | 7.948260326 | protein_coding | 19 | 45582530  | 45594782  | GEMIN7    |

|                 |             |             |                  |    |           |           |           |
|-----------------|-------------|-------------|------------------|----|-----------|-----------|-----------|
| ENSG00000142273 | 7.08903805  | 0.697730409 | protein_coding   | 19 | 45281126  | 45303891  | CBLC      |
| ENSG00000142279 | 3.004694206 | 3.027231696 | protein_coding   | 19 | 34971874  | 34992085  | WTIP      |
| ENSG00000142303 | 5.575999561 | 6.766973175 | protein_coding   | 19 | 8645126   | 8673183   | ADAMTS10  |
| ENSG00000142319 | 0.499066092 | 0.950786998 | protein_coding   | 5  | 1392909   | 1445545   | SLC6A3    |
| ENSG00000142327 | 8.803966282 | 8.222087975 | protein_coding   | 2  | 241505221 | 241518149 | RNPEPL1   |
| ENSG00000142330 | 8.191677941 | 7.844724842 | protein_coding   | 2  | 241526133 | 241557122 | CAPN10    |
| ENSG00000142347 | 5.625150983 | 6.210997888 | protein_coding   | 19 | 8585689   | 8642461   | MYO1F     |
| ENSG00000142396 | 8.803966282 | 9.208338404 | processed_transc | 19 | 58816715  | 58827023  |           |
| ENSG00000142405 | 1.960915222 | 0.697730409 | protein_coding   | 19 | 54296857  | 54327648  | NLRP12    |
| ENSG00000142408 | 7.737655476 | 8.821890565 | protein_coding   | 19 | 54466294  | 54493469  | CACNG8    |
| ENSG00000142409 | 9.707122248 | 9.459031647 | protein_coding   | 19 | 56598732  | 56632649  | ZNF787    |
| ENSG00000142444 | 8.53489446  | 8.85617872  | protein_coding   | 19 | 11039424  | 11040914  | C19orf52  |
| ENSG00000142449 | 4.381167248 | 3.96493948  | protein_coding   | 19 | 8130287   | 8212650   | FBN3      |
| ENSG00000142453 | 11.88661109 | 11.72230247 | protein_coding   | 19 | 10982253  | 11033448  | CARM1     |
| ENSG00000142459 | 9.513500523 | 9.359414727 | protein_coding   | 19 | 7895161   | 7929861   | EVI5L     |
| ENSG00000142494 | 0.869158192 | 0.697730409 | protein_coding   | 17 | 19437141  | 19482347  | SLC47A1   |
| ENSG00000142507 | 10.65133646 | 11.05174357 | protein_coding   | 17 | 4699439   | 4701798   | PSMB6     |
| ENSG00000142511 | 0.499066092 | 0           | protein_coding   | 19 | 51273858  | 51274928  | GPR32     |
| ENSG00000142512 | 3.554067925 | 3.906303962 | protein_coding   | 19 | 51913275  | 51921057  | SIGLEC10  |
| ENSG00000142513 | 3.274897671 | 1.925536307 | protein_coding   | 19 | 51293672  | 51298481  | ACPT      |
| ENSG00000142528 | 7.706593329 | 7.856387513 | protein_coding   | 19 | 50529212  | 50552029  | ZNF473    |
| ENSG00000142530 | 4.292665995 | 3.748356452 | protein_coding   | 19 | 50970047  | 50980003  | FAM71E1   |
| ENSG00000142534 | 11.69435783 | 12.41776886 | protein_coding   | 19 | 49999634  | 50002944  | RPS11     |
| ENSG00000142539 | 0           | 0.390640832 | protein_coding   | 19 | 50922195  | 50932246  | SPIB      |
| ENSG00000142541 | 11.39998188 | 12.14253511 | protein_coding   | 19 | 49990811  | 49995565  | RPL13A    |
| ENSG00000142544 | 5.869093502 | 5.9163892   | protein_coding   | 19 | 51600863  | 51611647  | CTU1      |
| ENSG00000142546 | 8.219950371 | 8.457255683 | protein_coding   | 19 | 50058970  | 50083813  | NOSIP     |
| ENSG00000142549 | 2.471521042 | 2.579085888 | protein_coding   | 19 | 51815102  | 51833608  | IGLON5    |
| ENSG00000142552 | 8.884394801 | 10.29401823 | protein_coding   | 19 | 50030875  | 50046889  | RCN3      |
| ENSG00000142556 | 8.183497283 | 8.379906558 | protein_coding   | 19 | 52516021  | 52531680  | ZNF614    |
| ENSG00000142583 | 3.448790144 | 3.493416095 | protein_coding   | 1  | 9095166   | 9148537   | SLC2A5    |
| ENSG00000142599 | 9.676117367 | 9.787165921 | protein_coding   | 1  | 8412457   | 8877702   | RERE      |
| ENSG00000142606 | 0.869158192 | 2.420525079 | protein_coding   | 1  | 2522078   | 2564481   | MMEL1     |
| ENSG00000142609 | 1.407729925 | 2.039052734 | protein_coding   | 1  | 1853396   | 1935276   | C1orf222  |
| ENSG00000142611 | 6.616550626 | 5.832272499 | protein_coding   | 1  | 2985732   | 3355185   | PRDM16    |
| ENSG00000142619 | 6.068837212 | 3.081239798 | protein_coding   | 1  | 17575593  | 17610728  | PADI3     |
| ENSG00000142621 | 4.322773689 | 4.17820932  | protein_coding   | 1  | 15573768  | 15726858  | FHAD1     |
| ENSG00000142623 | 3.448790144 | 2.971122874 | protein_coding   | 1  | 17531621  | 17572500  | PADI1     |
| ENSG00000142627 | 10.81682972 | 10.30256921 | protein_coding   | 1  | 16450832  | 16482582  | EPHA2     |
| ENSG00000142632 | 6.979904289 | 7.029859489 | protein_coding   | 1  | 16524349  | 16539140  | ARHGEF19  |
| ENSG00000142634 | 10.87291199 | 9.925997554 | protein_coding   | 1  | 15736391  | 15756839  | EFHD2     |
| ENSG00000142655 | 7.481543613 | 7.724721747 | protein_coding   | 1  | 10532345  | 10690815  | PEX14     |
| ENSG00000142657 | 10.01147814 | 9.840010211 | protein_coding   | 1  | 10458649  | 10480233  | PGD       |
| ENSG00000142661 | 3.004694206 | 2.788380093 | protein_coding   | 1  | 24382525  | 24438665  | MYOM3     |
| ENSG00000142669 | 10.35115602 | 10.40671051 | protein_coding   | 1  | 26605667  | 26608007  | SH3BGR13  |
| ENSG00000142675 | 8.011627561 | 7.405556541 | protein_coding   | 1  | 26503894  | 26516377  | CNKSRI    |
| ENSG00000142676 | 12.43125725 | 12.70854633 | protein_coding   | 1  | 24018269  | 24022915  | RPL11     |
| ENSG00000142677 | 4.491309013 | 3.493416095 | protein_coding   | 1  | 24446261  | 24469611  | IL22RA1   |
| ENSG00000142684 | 1.616589159 | 2.144285137 | protein_coding   | 1  | 26496362  | 26498551  | ZNF593    |
| ENSG00000142686 | 7.15746161  | 7.405556541 | protein_coding   | 1  | 36179476  | 36185073  | C1orf216  |
| ENSG00000142687 | 9.049908262 | 8.972384393 | protein_coding   | 1  | 35899091  | 36023551  | KIAA0319L |
| ENSG00000142694 | 5.255381949 | 5.98174124  | protein_coding   | 1  | 36787632  | 36789755  | FAM176B   |
| ENSG00000142700 | 0           | 0.697730409 | protein_coding   | 1  | 50883222  | 50889172  | DMRTA2    |
| ENSG00000142731 | 8.269098624 | 8.393311914 | protein_coding   | 4  | 128802016 | 128820350 | PLK4      |
| ENSG00000142733 | 8.588543011 | 8.677053487 | protein_coding   | 1  | 27681670  | 27693383  | MAP3K6    |
| ENSG00000142748 | 0.869158192 | 0.390640832 | protein_coding   | 1  | 27695603  | 27701315  | FCN3      |
| ENSG00000142751 | 7.784382559 | 7.703354924 | protein_coding   | 1  | 27205773  | 27216788  | GPN2      |
| ENSG00000142765 | 7.296703257 | 4.489113623 | protein_coding   | 1  | 27668513  | 27680421  | SYTL1     |
| ENSG00000142784 | 9.183066967 | 9.263397979 | protein_coding   | 1  | 27561007  | 27635110  | WDTC1     |
| ENSG00000142794 | 8.011627561 | 8.229580833 | protein_coding   | 1  | 21766621  | 21811498  | NBPF3     |
| ENSG00000142798 | 11.61388847 | 11.49978204 | protein_coding   | 1  | 22148738  | 22263790  | HSPG2     |
| ENSG00000142856 | 6.469548347 | 7.070480904 | protein_coding   | 1  | 63906441  | 64059392  | ITGB3BP   |
| ENSG00000142864 | 11.48710177 | 11.46131717 | protein_coding   | 1  | 67873493  | 67896098  | SERBP1    |



|                 |             |             |                |   |           |           |           |
|-----------------|-------------|-------------|----------------|---|-----------|-----------|-----------|
| ENSG00000142867 | 8.329659793 | 7.596144237 | protein_coding | 1 | 85731931  | 85743771  | BCL10     |
| ENSG00000142871 | 12.7627528  | 12.28229911 | protein_coding | 1 | 86046444  | 86049645  | CYR61     |
| ENSG00000142875 | 7.017207048 | 7.033288635 | protein_coding | 1 | 84543745  | 84704181  | PRKACB    |
| ENSG00000142892 | 8.081530559 | 8.386624806 | protein_coding | 1 | 77554675  | 77685115  | PIGK      |
| ENSG00000142910 | 10.22779886 | 8.590084877 | protein_coding | 1 | 32042116  | 32053288  | TINAGL1   |
| ENSG00000142920 | 4.962122459 | 5.248158938 | protein_coding | 1 | 33546705  | 33586131  | ADC       |
| ENSG00000142937 | 11.72021353 | 12.24535336 | protein_coding | 1 | 45240923  | 45244451  | RPS8      |
| ENSG00000142945 | 9.322767784 | 9.502977244 | protein_coding | 1 | 45205490  | 45233439  | KIF2C     |
| ENSG00000142949 | 12.89552653 | 12.57639643 | protein_coding | 1 | 43990858  | 44089343  | PTPRF     |
| ENSG00000142959 | 1.616589159 | 0.390640832 | protein_coding | 1 | 45249257  | 45253377  | BEST4     |
| ENSG00000142961 | 6.646617938 | 6.549526374 | protein_coding | 1 | 47073387  | 47082563  | MOB3C     |
| ENSG00000143001 | 1.960915222 | 0.697730409 | protein_coding | 1 | 55446465  | 55457966  | TMEM61    |
| ENSG00000143013 | 7.819120959 | 8.492561507 | protein_coding | 1 | 87794151  | 87812788  | LMO4      |
| ENSG00000143028 | 0.869158192 | 3.748356452 | protein_coding | 1 | 110009180 | 110024759 | SYPL2     |
| ENSG00000143033 | 7.720795447 | 7.966311947 | protein_coding | 1 | 93544792  | 93604638  | MTF2      |
| ENSG00000143036 | 3.950976309 | 3.935919592 | protein_coding | 1 | 95285898  | 95360802  | SLC44A3   |
| ENSG00000143061 | 8.694526397 | 8.693401904 | protein_coding | 1 | 117117031 | 117210375 | IGSF3     |
| ENSG00000143067 | 7.621344476 | 7.558560655 | protein_coding | 1 | 120162045 | 120190396 | ZNF697    |
| ENSG00000143079 | 7.269909329 | 7.426571535 | protein_coding | 1 | 112938803 | 113003786 | CTTNBP2NL |
| ENSG00000143093 | 4.962122459 | 4.794098771 | protein_coding | 1 | 110574199 | 110597263 | FAM40A    |
| ENSG00000143105 | 0           | 0.390640832 | protein_coding | 1 | 111059839 | 111061797 | KCNA10    |
| ENSG00000143106 | 9.553725034 | 9.934275143 | protein_coding | 1 | 109941653 | 109969062 | PSMA5     |
| ENSG00000143107 | 0.499066092 | 0           | protein_coding | 1 | 109255279 | 109285365 | FNDC7     |
| ENSG00000143110 | 1.960915222 | 2.420525079 | protein_coding | 1 | 112016414 | 112021134 | C1orf162  |
| ENSG00000143119 | 1.799000381 | 2.242360793 | protein_coding | 1 | 111415772 | 111442550 | CD53      |
| ENSG00000143126 | 6.528867325 | 5.446377228 | protein_coding | 1 | 109792641 | 109818377 | CELSR2    |
| ENSG00000143127 | 3.871730003 | 3.993387124 | protein_coding | 1 | 145524891 | 145543868 | ITGA10    |
| ENSG00000143140 | 0.499066092 | 0           | protein_coding | 1 | 147228332 | 147245484 | GJA5      |
| ENSG00000143147 | 5.036678094 | 4.810179682 | protein_coding | 1 | 168053997 | 168106821 | GPR161    |
| ENSG00000143149 | 9.85609616  | 9.989160763 | protein_coding | 1 | 165631453 | 165668100 | ALDH9A1   |
| ENSG00000143153 | 9.135091581 | 8.825850709 | protein_coding | 1 | 169074935 | 169101960 | ATP1B1    |
| ENSG00000143155 | 8.054871625 | 8.46616347  | protein_coding | 1 | 168148171 | 168169950 | TIPRL     |
| ENSG00000143156 | 7.384964606 | 7.648510984 | protein_coding | 1 | 169101769 | 169337205 | NME7      |
| ENSG00000143157 | 9.551342933 | 9.452002561 | protein_coding | 1 | 166808681 | 166825581 | POGK      |
| ENSG00000143158 | 7.311793575 | 8.205465413 | protein_coding | 1 | 167885967 | 167906278 | BRP44     |
| ENSG00000143162 | 8.205883411 | 8.476276902 | protein_coding | 1 | 167498914 | 167523004 | CREG1     |
| ENSG00000143164 | 8.983137923 | 9.33252778  | protein_coding | 1 | 167905021 | 168045081 | DCAF6     |
| ENSG00000143167 | 0           | 0.697730409 | protein_coding | 1 | 167022073 | 167059868 | GPA33     |
| ENSG00000143178 | 4.75690578  | 4.903073497 | protein_coding | 1 | 168250278 | 168283664 | TBX19     |
| ENSG00000143179 | 10.93879114 | 10.93926111 | protein_coding | 1 | 165796768 | 165880855 | UCK2      |
| ENSG00000143183 | 9.326487463 | 9.903220491 | protein_coding | 1 | 165696032 | 165738417 | TMCO1     |
| ENSG00000143184 | 0.499066092 | 0.390640832 | protein_coding | 1 | 168545711 | 168551315 | XLCL1     |
| ENSG00000143190 | 8.786518219 | 8.726612716 | protein_coding | 1 | 167190066 | 167396582 | POU2F1    |
| ENSG00000143194 | 0.499066092 | 0           | protein_coding | 1 | 166958346 | 166991451 | MAEL      |
| ENSG00000143198 | 8.568265199 | 9.52750079  | protein_coding | 1 | 165600098 | 165631033 | MGST3     |
| ENSG00000143199 | 1.616589159 | 1.353254395 | protein_coding | 1 | 167778625 | 167883453 | ADCY10    |
| ENSG00000143207 | 8.154494062 | 8.343077302 | protein_coding | 1 | 175911248 | 176176629 | RFWD2     |
| ENSG00000143217 | 4.6658819   | 1.667587519 | protein_coding | 1 | 161040785 | 161059389 | PVRL4     |
| ENSG00000143222 | 9.147761519 | 9.880078052 | protein_coding | 1 | 161122566 | 161128646 | UFC1      |
| ENSG00000143224 | 7.621344476 | 8.405271149 | protein_coding | 1 | 161136200 | 161147803 | PPOX      |
| ENSG00000143226 | 2.928422289 | 1.667587519 | protein_coding | 1 | 161475220 | 161493803 | FCGR2A    |
| ENSG00000143228 | 8.561968095 | 9.124010896 | protein_coding | 1 | 163236366 | 163325554 | NUF2      |
| ENSG00000143248 | 3.950976309 | 4.65855978  | protein_coding | 1 | 163080911 | 163187426 | RG55      |
| ENSG00000143252 | 9.820929282 | 10.09016079 | protein_coding | 1 | 161284047 | 161332984 | SDHC      |
| ENSG00000143256 | 10.16789832 | 10.71314019 | protein_coding | 1 | 161070346 | 161087901 | PFDN2     |
| ENSG00000143257 | 3.911897206 | 3.679994897 | protein_coding | 1 | 161199456 | 161208092 | NR1I3     |
| ENSG00000143258 | 8.986668406 | 9.170688365 | protein_coding | 1 | 161129240 | 161135513 | USP21     |
| ENSG00000143278 | 0.499066092 | 0           | protein_coding | 1 | 197008321 | 197036397 | F13B      |
| ENSG00000143294 | 10.06143835 | 10.02448085 | protein_coding | 1 | 156720402 | 156770607 | PRCC      |
| ENSG00000143303 | 7.974178365 | 8.078443681 | protein_coding | 1 | 156698234 | 156706752 | RRNAD1    |
| ENSG00000143314 | 9.49130376  | 9.990925412 | protein_coding | 1 | 156707095 | 156711382 | MRPL24    |
| ENSG00000143315 | 7.165790811 | 7.447284805 | protein_coding | 1 | 159997462 | 160001783 | PIGM      |
| ENSG00000143318 | 1.799000381 | 1.667587519 | protein_coding | 1 | 160160285 | 160171676 | CASQ1     |

|                 |             |             |                |   |           |           |          |
|-----------------|-------------|-------------|----------------|---|-----------|-----------|----------|
| ENSG00000143319 | 9.868906425 | 9.658178764 | protein_coding | 1 | 156691683 | 156698591 | ISG20L2  |
| ENSG00000143320 | 8.162840364 | 5.072639111 | protein_coding | 1 | 156669398 | 156675608 | CRABP2   |
| ENSG00000143321 | 13.57712274 | 13.4851589  | protein_coding | 1 | 156711899 | 156736717 | HDGF     |
| ENSG00000143322 | 9.14038425  | 9.275031414 | protein_coding | 1 | 179068462 | 179198819 | ABL2     |
| ENSG00000143324 | 8.715954662 | 8.349968848 | protein_coding | 1 | 180601140 | 180859387 | XPR1     |
| ENSG00000143333 | 5.948480845 | 6.779278886 | protein_coding | 1 | 182567758 | 182573543 | RGS16    |
| ENSG00000143337 | 8.547698305 | 8.661625988 | protein_coding | 1 | 179851177 | 179888412 | TOR1AIP1 |
| ENSG00000143341 | 1.407729925 | 3.368666104 | protein_coding | 1 | 185703683 | 186160085 | HMCN1    |
| ENSG00000143344 | 5.431503808 | 6.445267191 | protein_coding | 1 | 183605208 | 183897666 | RGL1     |
| ENSG00000143353 | 6.907250452 | 7.222412001 | protein_coding | 1 | 219347186 | 219386207 | LYPLAL1  |
| ENSG00000143355 | 0.499066092 | 1.16600992  | protein_coding | 1 | 197881618 | 197904608 | LHX9     |
| ENSG00000143363 | 8.613115289 | 8.593573257 | protein_coding | 1 | 150980896 | 151008189 | PRUNE    |
| ENSG00000143365 | 3.554067925 | 2.851901313 | protein_coding | 1 | 151778547 | 151804348 | RORC     |
| ENSG00000143367 | 9.241368875 | 9.570619293 | protein_coding | 1 | 151512781 | 151556059 | TUFT1    |
| ENSG00000143368 | 10.61263604 | 10.42183387 | protein_coding | 1 | 149895209 | 149900236 | SF3B4    |
| ENSG00000143369 | 6.129712275 | 8.232567113 | protein_coding | 1 | 150480538 | 150486265 | ECM1     |
| ENSG00000143373 | 9.34494335  | 9.159748241 | protein_coding | 1 | 151254094 | 151264381 | ZNF687   |
| ENSG00000143374 | 9.457778871 | 9.427453327 | protein_coding | 1 | 150459887 | 150480078 | TARS2    |
| ENSG00000143375 | 8.103376106 | 6.729413443 | protein_coding | 1 | 151482986 | 151511168 | CGN      |
| ENSG00000143376 | 9.930694319 | 9.688943177 | protein_coding | 1 | 151584541 | 151671567 | SNX27    |
| ENSG00000143379 | 8.821205846 | 9.095589939 | protein_coding | 1 | 150898739 | 150937213 | SETDB1   |
| ENSG00000143382 | 6.902274257 | 7.23139676  | protein_coding | 1 | 150521884 | 150533413 | ADAMTSL4 |
| ENSG00000143384 | 12.10874659 | 11.83441318 | protein_coding | 1 | 150547032 | 150552073 | MCL1     |
| ENSG00000143387 | 5.889353623 | 5.555337277 | protein_coding | 1 | 150768684 | 150780799 | CTSK     |
| ENSG00000143390 | 9.937399098 | 10.15730836 | protein_coding | 1 | 151313116 | 151319833 | RFX5     |
| ENSG00000143393 | 10.36161724 | 10.49919564 | protein_coding | 1 | 151264273 | 151300191 | PI4KB    |
| ENSG00000143398 | 10.26945679 | 10.21921274 | protein_coding | 1 | 151170425 | 151222012 | PIP5K1A  |
| ENSG00000143401 | 10.97390063 | 11.16588355 | protein_coding | 1 | 150190717 | 150208504 | ANP32E   |
| ENSG00000143409 | 7.123655438 | 7.475288518 | protein_coding | 1 | 150969025 | 150980851 | FAM63A   |
| ENSG00000143412 | 4.863159938 | 4.604259349 | protein_coding | 1 | 150954493 | 150968110 | ANXA9    |
| ENSG00000143416 | 7.997697782 | 7.053694091 | protein_coding | 1 | 151336778 | 151345209 | SELENBP1 |
| ENSG00000143418 | 10.35115602 | 10.69485148 | protein_coding | 1 | 150933059 | 150947479 | CERS2    |
| ENSG00000143420 | 10.30004761 | 10.66587203 | protein_coding | 1 | 150573327 | 150602088 | ENSA     |
| ENSG00000143429 | 5.718698586 | 6.559073862 | pseudogene     | 2 | 91823266  | 91847975  |          |
| ENSG00000143434 | 6.146643566 | 6.885547525 | protein_coding | 1 | 151104161 | 151119104 | SEMA6C   |
| ENSG00000143436 | 9.4441477   | 9.640862076 | protein_coding | 1 | 151732119 | 151736040 | MRPL9    |
| ENSG00000143437 | 9.292659966 | 9.291591823 | protein_coding | 1 | 150782181 | 150849244 | ARNT     |
| ENSG00000143442 | 10.22580854 | 10.37361447 | protein_coding | 1 | 151375200 | 151431941 | POGZ     |
| ENSG00000143443 | 5.498982484 | 5.125003832 | protein_coding | 1 | 151020216 | 151024462 | C1orf56  |
| ENSG00000143450 | 3.393122761 | 2.721932731 | protein_coding | 1 | 151735445 | 151743808 | OAZ3     |
| ENSG00000143452 | 6.998676229 | 6.651226688 | protein_coding | 1 | 150670536 | 150693364 | HORMAD1  |
| ENSG00000143457 | 8.742648075 | 9.037011115 | protein_coding | 1 | 150618701 | 150669672 | GOLPH3L  |
| ENSG00000143458 | 8.023133844 | 8.122575449 | protein_coding | 1 | 151043054 | 151098018 | GABPB2   |
| ENSG00000143466 | 8.899456749 | 9.362144241 | protein_coding | 1 | 206643791 | 206670223 | IKBKE    |
| ENSG00000143469 | 2.10647801  | 2.788380093 | protein_coding | 1 | 210111538 | 210337636 | SYT14    |
| ENSG00000143473 | 0.499066092 | 0           | protein_coding | 1 | 210856555 | 211307457 | KCNH1    |
| ENSG00000143476 | 8.899456749 | 9.13522434  | protein_coding | 1 | 212208919 | 212280742 | DTL      |
| ENSG00000143479 | 6.670228606 | 7.03670965  | protein_coding | 1 | 206808881 | 206857764 | DYRK3    |
| ENSG00000143486 | 8.583888749 | 9.012896966 | protein_coding | 1 | 206744620 | 206785904 | EIF2D    |
| ENSG00000143493 | 8.33889698  | 8.354088029 | protein_coding | 1 | 212113741 | 212208884 | INTS7    |
| ENSG00000143494 | 1.960915222 | 2.144285137 | protein_coding | 1 | 213123862 | 213165379 | VASH2    |
| ENSG00000143498 | 6.882196036 | 6.637773454 | protein_coding | 1 | 222731244 | 222763275 | TAF1A    |
| ENSG00000143499 | 8.457286611 | 8.371803145 | protein_coding | 1 | 214454445 | 214510474 | SMYD2    |
| ENSG00000143502 | 5.301468762 | 4.826083323 | protein_coding | 1 | 223394161 | 223537544 | SUSD4    |
| ENSG00000143507 | 7.850461307 | 7.512619979 | protein_coding | 1 | 221874766 | 221915518 | DUSP10   |
| ENSG00000143512 | 4.322773689 | 3.781359661 | protein_coding | 1 | 222695602 | 222721445 | HHIPL2   |
| ENSG00000143514 | 9.30213633  | 9.805832274 | protein_coding | 1 | 223967601 | 224033674 | TP53BP2  |
| ENSG00000143515 | 10.03837651 | 10.43226174 | protein_coding | 1 | 154298029 | 154323783 | ATP8B2   |
| ENSG00000143520 | 1.616589159 | 2.721932731 | protein_coding | 1 | 152321213 | 152332482 | FLG2     |
| ENSG00000143537 | 11.49683168 | 12.2544723  | protein_coding | 1 | 155023042 | 155035252 | ADAM15   |
| ENSG00000143543 | 10.47739354 | 10.83848808 | protein_coding | 1 | 153946745 | 153950164 | JTB      |
| ENSG00000143545 | 9.361354163 | 10.06231762 | protein_coding | 1 | 153954127 | 153958834 | RAB13    |
| ENSG00000143546 | 1.407729925 | 1.16600992  | protein_coding | 1 | 153362508 | 153363664 | S100A8   |

|                 |             |              |                |   |           |           |          |
|-----------------|-------------|--------------|----------------|---|-----------|-----------|----------|
| ENSG00000143549 | 12.30273399 | 12.34400654  | protein_coding | 1 | 154127784 | 154167124 | TPM3     |
| ENSG00000143552 | 2.471521042 | 1.802319292  | protein_coding | 1 | 153965161 | 154127592 | NUP210L  |
| ENSG00000143553 | 8.120617457 | 8.7455513    | protein_coding | 1 | 153631130 | 153634306 | SNAPIN   |
| ENSG00000143554 | 6.922076877 | 6.097646709  | protein_coding | 1 | 153746830 | 153752633 | SLC27A3  |
| ENSG00000143569 | 11.57650097 | 11.76559685  | protein_coding | 1 | 154192655 | 154243986 | UBAP2L   |
| ENSG00000143570 | 11.44601171 | 11.53754982  | protein_coding | 1 | 153931575 | 153940188 | SLC39A1  |
| ENSG00000143575 | 9.979350975 | 10.41494939  | protein_coding | 1 | 154244987 | 154248351 | HAX1     |
| ENSG00000143578 | 6.92698535  | 7.416102302  | protein_coding | 1 | 153940010 | 153946839 | CREB3L4  |
| ENSG00000143590 | 5.695874189 | 7.106738413  | protein_coding | 1 | 155036224 | 155060014 | EFNA3    |
| ENSG00000143603 | 5.286269488 | 6.475832214  | protein_coding | 1 | 154679902 | 154842756 | KCNN3    |
| ENSG00000143612 | 10.899376   | 11.06771712  | protein_coding | 1 | 154179196 | 154193104 | C1orf43  |
| ENSG00000143614 | 10.06199625 | 9.784116057  | protein_coding | 1 | 153777201 | 153895451 | GATAD2B  |
| ENSG00000143621 | 11.54132321 | 11.88226087  | protein_coding | 1 | 153634512 | 153643524 | ILF2     |
| ENSG00000143622 | 8.2535526   | 8.053329862  | protein_coding | 1 | 155867599 | 155881195 | RIT1     |
| ENSG00000143624 | 11.03342956 | 11.21067871  | protein_coding | 1 | 153700543 | 153746555 | INTS3    |
| ENSG00000143627 | 1.16343121  | 1.16600992   | protein_coding | 1 | 155259086 | 155271225 | PKLR     |
| ENSG00000143630 | 5.948480845 | 6.59664425   | protein_coding | 1 | 155247374 | 155259639 | HCN3     |
| ENSG00000143631 | 5.625150983 | 6.186567173  | protein_coding | 1 | 152274651 | 152297679 | FLG      |
| ENSG00000143632 | 1.616589159 | 1.925536307  | protein_coding | 1 | 229566992 | 229569845 | ACTA1    |
| ENSG00000143633 | 6.907250452 | 7.652976045  | protein_coding | 1 | 231359509 | 231376933 | C1orf131 |
| ENSG00000143641 | 11.24352018 | 11.35708252  | protein_coding | 1 | 230193536 | 230417870 | GALNT2   |
| ENSG00000143643 | 7.67776266  | 8.060069742  | protein_coding | 1 | 231041989 | 231114621 | TTC13    |
| ENSG00000143653 | 8.307246212 | 9.099684516  | protein_coding | 1 | 246887349 | 246931439 | SCCPDH   |
| ENSG00000143669 | 8.271030151 | 8.608592853  | protein_coding | 1 | 235824341 | 236046940 | LYST     |
| ENSG00000143674 | 7.795160661 | 7.213370937  | protein_coding | 1 | 233463514 | 233520894 |          |
| ENSG00000143702 | 8.56983519  | 8.616616024  | protein_coding | 1 | 243287730 | 243418708 | CEP170   |
| ENSG00000143727 | 9.368588363 | 9.076603748  | protein_coding | 2 | 264140    | 278283    | ACP1     |
| ENSG00000143740 | 8.629769183 | 8.587754596  | protein_coding | 1 | 227916240 | 227968927 | SNAP47   |
| ENSG00000143742 | 9.810342685 | 10.195304663 | protein_coding | 1 | 225965531 | 225978168 | SRP9     |
| ENSG00000143748 | 8.020839917 | 8.559493622  | protein_coding | 1 | 224415036 | 224518089 | NVL      |
| ENSG00000143751 | 8.257454839 | 8.071789292  | protein_coding | 1 | 226170403 | 226187066 | C1orf55  |
| ENSG00000143753 | 9.549752678 | 9.403804382  | protein_coding | 1 | 224363458 | 224381143 | DEGS1    |
| ENSG00000143756 | 8.930339658 | 9.019827949  | protein_coding | 1 | 224301789 | 224349749 | FBXO28   |
| ENSG00000143761 | 12.33390546 | 12.48802068  | protein_coding | 1 | 228270361 | 228286912 | ARF1     |
| ENSG00000143771 | 8.325948295 | 8.885882287  | protein_coding | 1 | 224544552 | 224567161 | CNIH4    |
| ENSG00000143772 | 7.587643674 | 7.410839058  | protein_coding | 1 | 226819391 | 226927024 | ITPKB    |
| ENSG00000143774 | 10.48864213 | 11.0040448   | protein_coding | 1 | 228327663 | 228336685 | GUK1     |
| ENSG00000143776 | 9.30119149  | 9.445582628  | protein_coding | 1 | 227177566 | 227506175 | CDC42BPA |
| ENSG00000143786 | 5.301468762 | 4.857374129  | protein_coding | 1 | 224622362 | 224928251 | CNIH3    |
| ENSG00000143793 | 7.680671792 | 7.86795666   | protein_coding | 1 | 228288427 | 228293112 | C1orf35  |
| ENSG00000143797 | 8.66103884  | 7.852510423  | protein_coding | 2 | 8992820   | 9143942   | MBOAT2   |
| ENSG00000143799 | 11.90024677 | 12.16067846  | protein_coding | 1 | 224102741 | 226595780 | PARP1    |
| ENSG00000143801 | 7.976547636 | 8.066778281  | protein_coding | 1 | 227057885 | 227083806 | PSEN2    |
| ENSG00000143811 | 8.632776617 | 8.865827498  | protein_coding | 1 | 226107578 | 226111978 | PYCR2    |
| ENSG00000143815 | 9.723436728 | 9.474880612  | protein_coding | 1 | 225589204 | 225616627 | LBR      |
| ENSG00000143816 | 8.746818039 | 5.855704078  | protein_coding | 1 | 228106357 | 228135631 | WNT9A    |
| ENSG00000143819 | 8.649206367 | 8.308116953  | protein_coding | 1 | 225997794 | 226033260 | EPHX1    |
| ENSG00000143839 | 0.499066092 | 0.697730409  | protein_coding | 1 | 204123944 | 204135465 | REN      |
| ENSG00000143842 | 8.625246244 | 7.8660349    | protein_coding | 1 | 204042243 | 204096863 | SOX13    |
| ENSG00000143845 | 5.107569429 | 3.714580548  | protein_coding | 1 | 204100190 | 204121307 | ETNK2    |
| ENSG00000143847 | 5.858855738 | 7.243290054  | protein_coding | 1 | 202995626 | 203047864 | PPFIA4   |
| ENSG00000143850 | 5.538004898 | 4.777836593  | protein_coding | 1 | 204190349 | 204346793 | PLEKHA6  |
| ENSG00000143851 | 0.869158192 | 1.16600992   | protein_coding | 1 | 202116141 | 202130716 | PTPN7    |
| ENSG00000143858 | 3.274897671 | 2.851901313  | protein_coding | 1 | 202559724 | 202679545 | SYT2     |
| ENSG00000143862 | 7.323008624 | 7.389591938  | protein_coding | 1 | 202102532 | 202113869 | ARL8A    |
| ENSG00000143867 | 3.077135474 | 1.802319292  | protein_coding | 2 | 19551246  | 19558414  | OSR1     |
| ENSG00000143869 | 0.499066092 | 0            | protein_coding | 2 | 20866424  | 20873418  | GDF7     |
| ENSG00000143870 | 11.17580182 | 10.91646202  | protein_coding | 2 | 10923517  | 10978103  | PDIA6    |
| ENSG00000143878 | 10.31182317 | 9.223427792  | protein_coding | 2 | 20646835  | 20649200  | RHOB     |
| ENSG00000143882 | 4.026095388 | 3.845183986  | protein_coding | 2 | 10861775  | 10925236  | ATP6V1C2 |
| ENSG00000143889 | 8.628263112 | 8.78167951   | protein_coding | 2 | 38789120  | 38830728  | HNRPLL   |
| ENSG00000143891 | 6.771940731 | 6.293387477  | protein_coding | 2 | 38893052  | 38968379  | GALM     |
| ENSG00000143919 | 5.879259127 | 6.136428444  | protein_coding | 2 | 44589089  | 44999731  | CAMKMT   |

|                 |             |             |                |   |           |           |          |
|-----------------|-------------|-------------|----------------|---|-----------|-----------|----------|
| ENSG00000143924 | 9.616598542 | 9.569438796 | protein_coding | 2 | 42396490  | 42559688  | EML4     |
| ENSG00000143933 | 11.25649564 | 11.92684508 | protein_coding | 2 | 47272677  | 47403740  | CALM2    |
| ENSG00000143942 | 5.967663407 | 6.376734172 | protein_coding | 2 | 53994929  | 54002333  | CHAC2    |
| ENSG00000143947 | 10.01954299 | 10.62242012 | protein_coding | 2 | 55459039  | 55462989  | RPS27A   |
| ENSG00000143951 | 5.158541613 | 5.784235782 | protein_coding | 2 | 63348518  | 64054977  | WDPCP    |
| ENSG00000143952 | 7.952677993 | 7.799123587 | protein_coding | 2 | 64120035  | 64246567  | VP554    |
| ENSG00000143970 | 9.233465948 | 9.369623887 | protein_coding | 2 | 25960557  | 26101385  | ASXL2    |
| ENSG00000143971 | 6.96088487  | 7.050313162 | protein_coding | 2 | 67624451  | 67637677  | ETAA1    |
| ENSG00000143977 | 8.15239992  | 9.029304007 | protein_coding | 2 | 70508494  | 70520903  | SNRPG    |
| ENSG00000143994 | 1.616589159 | 2.144285137 | protein_coding | 2 | 27346682  | 27353680  | ABHD1    |
| ENSG00000143995 | 5.672682881 | 5.593003837 | protein_coding | 2 | 66660584  | 66799890  | MEIS1    |
| ENSG00000144021 | 9.9233443   | 9.415020261 | protein_coding | 2 | 96931870  | 96939087  | CIAO1    |
| ENSG00000144026 | 7.434062125 | 6.995112131 | protein_coding | 2 | 95813075  | 95831158  | ZNF514   |
| ENSG00000144028 | 12.25266173 | 11.82318997 | protein_coding | 2 | 96940074  | 96971297  | SNRNP200 |
| ENSG00000144029 | 9.546566899 | 8.753889302 | protein_coding | 2 | 95752952  | 95815179  | MRPS5    |
| ENSG00000144031 | 1.799000381 | 1.925536307 | protein_coding | 2 | 71205510  | 71212626  | ANKRD53  |
| ENSG00000144034 | 7.0218028   | 7.534563804 | protein_coding | 2 | 73956231  | 73964527  | TPRKB    |
| ENSG00000144036 | 8.205883411 | 7.915187059 | protein_coding | 2 | 72403113  | 73053177  | EXOC6B   |
| ENSG00000144040 | 7.102117104 | 7.23139676  | protein_coding | 2 | 73169165  | 73302747  | SFXN5    |
| ENSG00000144043 | 9.713528165 | 9.675290063 | protein_coding | 2 | 71213068  | 71222075  | TEX261   |
| ENSG00000144045 | 1.616589159 | 3.232099092 | protein_coding | 2 | 74745258  | 74753463  | DQX1     |
| ENSG00000144048 | 7.621344476 | 7.598461017 | protein_coding | 2 | 73989311  | 74007284  | DUSP11   |
| ENSG00000144061 | 6.163378456 | 6.142791909 | protein_coding | 2 | 110879888 | 110962643 | NPHP1    |
| ENSG00000144063 | 7.827020104 | 3.081239798 | protein_coding | 2 | 110841447 | 110874143 | MALL     |
| ENSG00000144115 | 7.913645586 | 8.226588358 | protein_coding | 2 | 88469835  | 88486146  | THNSL2   |
| ENSG00000144118 | 9.546566899 | 9.00680492  | protein_coding | 2 | 120997640 | 121052285 | RALB     |
| ENSG00000144120 | 7.587643674 | 7.711939664 | protein_coding | 2 | 120436743 | 120444083 | TMEM177  |
| ENSG00000144130 | 1.799000381 | 0.697730409 | protein_coding | 2 | 113479063 | 113500456 | NT5DC4   |
| ENSG00000144134 | 5.763291843 | 5.840125386 | protein_coding | 2 | 114384806 | 114400973 | RABL2A   |
| ENSG00000144136 | 10.87386554 | 9.83707015  | protein_coding | 2 | 113403434 | 113421404 | SLC20A1  |
| ENSG00000144152 | 4.381167248 | 4.048652948 | protein_coding | 2 | 112895962 | 112945791 | FBLN7    |
| ENSG00000144161 | 6.846372398 | 6.803579823 | protein_coding | 2 | 112973254 | 113012713 | ZC3H8    |
| ENSG00000144182 | 5.270908378 | 4.826083323 | protein_coding | 2 | 99771418  | 99779620  | LIPT1    |
| ENSG00000144199 | 6.922076877 | 6.097646709 | protein_coding | 2 | 97747779  | 97760619  | FAHD2B   |
| ENSG00000144214 | 3.603959378 | 3.32456471  | protein_coding | 2 | 99900701  | 99921205  | LYG1     |
| ENSG00000144218 | 0.499066092 | 1.667587519 | protein_coding | 2 | 100163718 | 100759201 | AFF3     |
| ENSG00000144224 | 10.19917421 | 10.24679846 | protein_coding | 2 | 136499189 | 136542633 | UBXN4    |
| ENSG00000144227 | 0           | 0.390640832 | protein_coding | 2 | 139428342 | 139537918 | NXP2     |
| ENSG00000144228 | 8.158673248 | 7.944622739 | protein_coding | 2 | 139259371 | 139331117 | SPOPL    |
| ENSG00000144230 | 0           | 1.16600992  | protein_coding | 2 | 128403439 | 128413754 | GPR17    |
| ENSG00000144231 | 8.614637248 | 8.171634445 | protein_coding | 2 | 128603896 | 128615731 | POLR2D   |
| ENSG00000144233 | 8.952173002 | 8.709567138 | protein_coding | 2 | 128619204 | 128643496 | AMMECR1L |
| ENSG00000144283 | 10.02241241 | 9.580614711 | protein_coding | 2 | 159313476 | 159539391 | PKP4     |
| ENSG00000144306 | 6.998676229 | 6.977419495 | protein_coding | 2 | 175260458 | 175294303 | SCRN3    |
| ENSG00000144320 | 8.954578658 | 8.899098923 | protein_coding | 2 | 176788620 | 176867567 | KIAA1715 |
| ENSG00000144331 | 2.10647801  | 0.950786998 | protein_coding | 2 | 180306709 | 180726232 | ZNF385B  |
| ENSG00000144354 | 9.436423186 | 8.870627795 | protein_coding | 2 | 174219548 | 174233725 | CDCA7    |
| ENSG00000144355 | 2.762599152 | 3.368666104 | protein_coding | 2 | 172949468 | 172954405 | DLX1     |
| ENSG00000144357 | 9.12764907  | 8.910331892 | protein_coding | 2 | 170683968 | 170940641 | UBR3     |
| ENSG00000144362 | 4.568725997 | 4.710890357 | protein_coding | 2 | 170550975 | 170558218 | PHOSPHO2 |
| ENSG00000144366 | 7.136425764 | 7.664078611 | protein_coding | 2 | 189156396 | 189460653 | GULP1    |
| ENSG00000144369 | 5.036678094 | 4.961837817 | protein_coding | 2 | 187558698 | 187630685 | FAM171B  |
| ENSG00000144381 | 12.39750633 | 11.94402674 | protein_coding | 2 | 198351305 | 198381461 | HSPD1    |
| ENSG00000144395 | 6.236372259 | 6.775188634 | protein_coding | 2 | 197504278 | 197628214 | CCDC150  |
| ENSG00000144401 | 7.471499737 | 7.249200135 | protein_coding | 2 | 208445355 | 208490652 | METTL21A |
| ENSG00000144406 | 0           | 0.390640832 | protein_coding | 2 | 210636717 | 210864024 | UNC80    |
| ENSG00000144410 | 0.499066092 | 1.518964905 | protein_coding | 2 | 207804278 | 207834198 | CPO      |
| ENSG00000144426 | 6.760987087 | 6.655683365 | protein_coding | 2 | 203879602 | 204091101 | NBEAL1   |
| ENSG00000144445 | 6.766474304 | 7.182818183 | protein_coding | 2 | 210885435 | 211036107 | C2orf67  |
| ENSG00000144451 | 6.421663777 | 6.142791909 | protein_coding | 2 | 214149113 | 215275225 | SPAG16   |
| ENSG00000144452 | 1.960915222 | 1.16600992  | protein_coding | 2 | 215796266 | 216003151 | ABCA12   |
| ENSG00000144455 | 8.229914881 | 8.401295742 | protein_coding | 3 | 3742498   | 4508965   | SUMF1    |
| ENSG00000144460 | 0.499066092 | 1.667587519 | protein_coding | 2 | 226265364 | 226518734 | NYAP2    |

|                 |             |             |                  |   |           |           |          |
|-----------------|-------------|-------------|------------------|---|-----------|-----------|----------|
| ENSG00000144468 | 8.625246244 | 8.061749803 | protein_coding   | 2 | 227700297 | 227863931 | RHBDD1   |
| ENSG00000144476 | 2.10647801  | 0.390640832 | protein_coding   | 2 | 237476430 | 237491001 | CXCR7    |
| ENSG00000144481 | 0.869158192 | 1.518964905 | protein_coding   | 2 | 234826043 | 234928166 | TRPM8    |
| ENSG00000144485 | 5.575999561 | 4.65855978  | protein_coding   | 2 | 239146908 | 239149303 | HES6     |
| ENSG00000144488 | 6.814942123 | 7.022976646 | protein_coding   | 2 | 239008798 | 239041928 | ESPNL    |
| ENSG00000144504 | 7.440941622 | 7.219404604 | protein_coding   | 2 | 241418839 | 241508626 | ANKMY1   |
| ENSG00000144524 | 9.05999771  | 8.669360359 | protein_coding   | 2 | 232646381 | 232674093 | COP57B   |
| ENSG00000144535 | 8.099033379 | 7.612284109 | protein_coding   | 2 | 232825955 | 233209060 | DIS3L2   |
| ENSG00000144550 | 1.616589159 | 1.667587519 | protein_coding   | 3 | 9745491   | 9771592   | CPNE9    |
| ENSG00000144554 | 9.558477469 | 9.110276346 | protein_coding   | 3 | 10068098  | 10143614  | FANCD2   |
| ENSG00000144559 | 7.093410923 | 7.216390925 | protein_coding   | 3 | 11831916  | 11888393  | TAMM41   |
| ENSG00000144560 | 7.925957035 | 7.903991977 | protein_coding   | 3 | 11597544  | 11762220  | VGLL4    |
| ENSG00000144566 | 8.725846631 | 8.549948921 | protein_coding   | 3 | 19988571  | 20026667  | RAB5A    |
| ENSG00000144567 | 9.966893004 | 9.814826612 | protein_coding   | 2 | 220040947 | 220050201 | FAM134A  |
| ENSG00000144579 | 9.839270931 | 9.552809598 | protein_coding   | 2 | 219262979 | 219270664 | CTDSP1   |
| ENSG00000144580 | 10.1097262  | 9.804327751 | protein_coding   | 2 | 219433303 | 219461803 | RQCD1    |
| ENSG00000144583 | 8.032273249 | 6.117167886 | protein_coding   | 2 | 217122588 | 217236750 | 4-Mar    |
| ENSG00000144589 | 8.583888749 | 8.237034976 | protein_coding   | 2 | 220462582 | 220481173 | STK11IP  |
| ENSG00000144591 | 10.09344535 | 10.3254768  | protein_coding   | 2 | 220363589 | 220371710 | GMPPA    |
| ENSG00000144596 | 2.57521082  | 2.721932731 | processed_transc | 3 | 14530619  | 14583588  | GRIP2    |
| ENSG00000144597 | 8.143992822 | 7.648510984 | protein_coding   | 3 | 15468862  | 15484120  | EAF1     |
| ENSG00000144619 | 0.499066092 | 0           | protein_coding   | 3 | 2140497   | 3099645   | CNTN4    |
| ENSG00000144635 | 8.528449672 | 8.717049372 | protein_coding   | 3 | 32567463  | 32612366  | DYNC1L11 |
| ENSG00000144642 | 6.664362065 | 6.733635362 | protein_coding   | 3 | 29322473  | 30051886  | RBMS3    |
| ENSG00000144645 | 7.913645586 | 6.762847836 | protein_coding   | 3 | 31699382  | 32119072  | OSBPL10  |
| ENSG00000144647 | 8.109865782 | 8.419754632 | protein_coding   | 3 | 43120724  | 43147568  | C3orf39  |
| ENSG00000144648 | 1.616589159 | 2.334191469 | protein_coding   | 3 | 42846244  | 42949597  | CCBP2    |
| ENSG00000144649 | 2.471521042 | 3.64455972  | protein_coding   | 3 | 43020759  | 43101703  | FAM198A  |
| ENSG00000144655 | 9.196341019 | 7.497803111 | protein_coding   | 3 | 39183346  | 39196053  | CSRN1    |
| ENSG00000144659 | 7.925957035 | 8.213044874 | protein_coding   | 3 | 39424839  | 39438679  | SLC25A38 |
| ENSG00000144668 | 1.960915222 | 2.039052734 | protein_coding   | 3 | 37493606  | 37865005  | ITGA9    |
| ENSG00000144671 | 2.238690726 | 2.242360793 | protein_coding   | 3 | 38323785  | 38360066  | SLC22A14 |
| ENSG00000144674 | 9.735377778 | 9.787673606 | protein_coding   | 3 | 37284668  | 37408242  | GOLGA4   |
| ENSG00000144677 | 8.720202385 | 7.793067905 | protein_coding   | 3 | 37903451  | 38025960  | CTDSPL   |
| ENSG00000144681 | 7.91858278  | 7.551403417 | protein_coding   | 3 | 36421836  | 36589499  | STAC     |
| ENSG00000144711 | 9.486324422 | 8.871585941 | protein_coding   | 3 | 12938719  | 13114617  | IQSEC1   |
| ENSG00000144712 | 2.762599152 | 2.721932731 | protein_coding   | 3 | 12837971  | 12913415  | CAND2    |
| ENSG00000144713 | 11.73725499 | 12.08690074 | protein_coding   | 3 | 12875984  | 12883087  | RPL32    |
| ENSG00000144724 | 8.735671237 | 8.5772215   | protein_coding   | 3 | 61547243  | 62283288  | PTPRG    |
| ENSG00000144730 | 7.568924112 | 7.182818183 | protein_coding   | 3 | 57124010  | 57204334  | IL17RD   |
| ENSG00000144736 | 8.092494681 | 8.103127799 | protein_coding   | 3 | 72798428  | 72911065  | SHQ1     |
| ENSG00000144741 | 7.507990374 | 7.591499486 | protein_coding   | 3 | 66119285  | 66438530  | SLC25A26 |
| ENSG00000144744 | 8.585441838 | 8.880180737 | protein_coding   | 3 | 69103881  | 69129559  | UBA3     |
| ENSG00000144746 | 9.466233411 | 9.662060384 | protein_coding   | 3 | 69134095  | 69155217  | ARL6IP5  |
| ENSG00000144747 | 8.346244381 | 8.673761454 | protein_coding   | 3 | 69068978  | 69101484  | TMF1     |
| ENSG00000144749 | 9.293610409 | 9.696532858 | protein_coding   | 3 | 66429221  | 66551687  | LRIG1    |
| ENSG00000144791 | 8.708847212 | 8.673761454 | protein_coding   | 3 | 45596886  | 45727830  | LIMD1    |
| ENSG00000144792 | 1.960915222 | 1.353254395 | protein_coding   | 3 | 44619715  | 44641186  | ZNF660   |
| ENSG00000144802 | 9.631710027 | 9.692743008 | protein_coding   | 3 | 101546835 | 101579866 | NFKBIZ   |
| ENSG00000144810 | 10.34749948 | 9.981193025 | protein_coding   | 3 | 99357319  | 99518070  | COL8A1   |
| ENSG00000144815 | 7.035502862 | 6.815578497 | protein_coding   | 3 | 101498046 | 101547073 | FAM55C   |
| ENSG00000144820 | 0           | 0.390640832 | protein_coding   | 3 | 100328433 | 100414323 | GPR128   |
| ENSG00000144821 | 7.262161623 | 6.50081754  | protein_coding   | 3 | 108099216 | 108248169 | MYH15    |
| ENSG00000144824 | 11.15921124 | 11.30039785 | protein_coding   | 3 | 111451327 | 111695364 | PHLDB2   |
| ENSG00000144827 | 8.414239457 | 8.228085371 | protein_coding   | 3 | 111697857 | 111712210 | ABHD10   |
| ENSG00000144834 | 0.499066092 | 0.390640832 | protein_coding   | 3 | 111717511 | 111732734 | TAGLN3   |
| ENSG00000144837 | 0.499066092 | 0.390640832 | protein_coding   | 3 | 119316689 | 119348658 | PLA1A    |
| ENSG00000144840 | 7.402691859 | 7.154756319 | protein_coding   | 3 | 120405528 | 120461840 | RABL3    |
| ENSG00000144843 | 5.81716234  | 5.536128679 | protein_coding   | 3 | 119298115 | 119308792 | ADPRH    |
| ENSG00000144847 | 0           | 0.390640832 | protein_coding   | 3 | 118619404 | 118864915 | IGSF11   |
| ENSG00000144848 | 9.167597433 | 9.132828786 | protein_coding   | 3 | 112251356 | 112280893 | ATG3     |
| ENSG00000144852 | 0.499066092 | 0.390640832 | protein_coding   | 3 | 119499331 | 119537332 | NR1I2    |
| ENSG00000144857 | 0.499066092 | 0.697730409 | protein_coding   | 3 | 112929850 | 113006303 | BOC      |

|                 |             |             |                |   |           |           |          |
|-----------------|-------------|-------------|----------------|---|-----------|-----------|----------|
| ENSG00000144867 | 9.382055486 | 9.552809598 | protein_coding | 3 | 133502877 | 133544616 | SRPRB    |
| ENSG00000144893 | 1.16343121  | 4.406904905 | protein_coding | 3 | 150803484 | 151154860 | MED12L   |
| ENSG00000144895 | 10.08468652 | 9.853651825 | protein_coding | 3 | 150264465 | 150302029 | EIF2A    |
| ENSG00000144908 | 4.689181911 | 3.532712221 | protein_coding | 3 | 125822412 | 125916837 | ALDH1L1  |
| ENSG00000144909 | 8.000028772 | 8.130601896 | protein_coding | 3 | 125247702 | 125313934 | OSBPL11  |
| ENSG00000144935 | 6.84118134  | 7.373448694 | protein_coding | 3 | 142442916 | 142526730 | TRPC1    |
| ENSG00000144959 | 8.885655987 | 8.640421249 | protein_coding | 3 | 172348039 | 172429008 | NCEH1    |
| ENSG00000145002 | 1.616589159 | 1.518964905 | protein_coding | 8 | 12282913  | 12293915  | FAM86B2  |
| ENSG00000145012 | 9.467076146 | 9.311499072 | protein_coding | 3 | 187871072 | 188608460 | LPP      |
| ENSG00000145014 | 8.474152153 | 8.960725939 | protein_coding | 3 | 194308402 | 194354418 | TMEM44   |
| ENSG00000145016 | 9.036344956 | 8.34859317  | protein_coding | 3 | 197398264 | 197476598 | KIAA0226 |
| ENSG00000145020 | 6.005279909 | 6.45552765  | protein_coding | 3 | 49454211  | 49460186  | AMT      |
| ENSG00000145022 | 7.190493718 | 7.470237199 | protein_coding | 3 | 49449639  | 49453908  | TCTA     |
| ENSG00000145029 | 5.637181576 | 6.1803943   | protein_coding | 3 | 49460379  | 49466759  | NICN1    |
| ENSG00000145040 | 6.567100227 | 7.252146121 | protein_coding | 3 | 48599160  | 48601206  | UCN2     |
| ENSG00000145041 | 8.920528869 | 8.686884751 | protein_coding | 3 | 51433298  | 51534010  | VPRBP    |
| ENSG00000145050 | 8.720202385 | 8.897218229 | protein_coding | 3 | 51422478  | 51426828  | MANF     |
| ENSG00000145075 | 3.652182994 | 4.15321211  | protein_coding | 3 | 180320646 | 180588793 | CCDC39   |
| ENSG00000145087 | 1.799000381 | 1.353254395 | protein_coding | 3 | 120626919 | 121143608 | STXBP5L  |
| ENSG00000145088 | 3.274897671 | 4.29708397  | protein_coding | 3 | 121554030 | 121605373 | EAF2     |
| ENSG00000145107 | 4.292665995 | 4.448594745 | protein_coding | 3 | 196042953 | 196065374 | TM4SF19  |
| ENSG00000145113 | 8.610066544 | 2.334191469 | protein_coding | 3 | 195473636 | 195539148 | MUC4     |
| ENSG00000145147 | 3.871730003 | 5.187895122 | protein_coding | 4 | 20254883  | 20622184  | SLIT2    |
| ENSG00000145191 | 9.356814297 | 9.337390687 | protein_coding | 3 | 183852826 | 184402546 | EIF2B5   |
| ENSG00000145194 | 8.465744027 | 8.754928172 | protein_coding | 3 | 183967438 | 184010819 | ECE2     |
| ENSG00000145198 | 2.471521042 | 2.144285137 | protein_coding | 3 | 183948217 | 183960117 | VWA5B2   |
| ENSG00000145214 | 8.162840364 | 7.992972811 | protein_coding | 4 | 952675    | 980683    | DGKQ     |
| ENSG00000145216 | 8.635777795 | 8.398639372 | protein_coding | 4 | 54243810  | 55161439  | FIP1L1   |
| ENSG00000145217 | 4.981125677 | 4.761389014 | protein_coding | 4 | 972861    | 987228    | SLC26A1  |
| ENSG00000145220 | 8.771587845 | 8.584252102 | protein_coding | 4 | 4269428   | 4291896   | LYAR     |
| ENSG00000145241 | 6.687686437 | 7.122922611 | protein_coding | 4 | 68337521  | 68411324  | CENPC1   |
| ENSG00000145244 | 1.616589159 | 0.950786998 | protein_coding | 4 | 47596015  | 47840123  | CORIN    |
| ENSG00000145246 | 8.485841807 | 8.437980325 | protein_coding | 4 | 47487305  | 47595503  | ATP10D   |
| ENSG00000145247 | 8.561968095 | 8.801925129 | protein_coding | 4 | 48887036  | 48908954  | OCIAD2   |
| ENSG00000145248 | 0.869158192 | 0.390640832 | protein_coding | 4 | 48485360  | 48491213  | SLC10A4  |
| ENSG00000145283 | 0           | 0.390640832 | protein_coding | 4 | 87744621  | 87770416  | SLC10A6  |
| ENSG00000145284 | 3.211941663 | 6.117167886 | protein_coding | 4 | 83550692  | 83720010  | SCD5     |
| ENSG00000145287 | 5.360713447 | 3.532712221 | protein_coding | 4 | 84011201  | 84058228  | PLAC8    |
| ENSG00000145293 | 8.774313977 | 8.623457692 | protein_coding | 4 | 83351715  | 83382244  | ENOPH1   |
| ENSG00000145331 | 5.107569429 | 5.496926774 | protein_coding | 4 | 100467866 | 100485189 | RG9MTD2  |
| ENSG00000145332 | 7.639400234 | 7.475288518 | protein_coding | 4 | 88081255  | 88141760  | KLHL8    |
| ENSG00000145337 | 8.29020451  | 9.074940905 | protein_coding | 4 | 89442136  | 89444964  | PIGY     |
| ENSG00000145348 | 6.887241849 | 7.556178852 | protein_coding | 4 | 106965474 | 107242652 | TBCK     |
| ENSG00000145349 | 8.103376106 | 8.165397208 | protein_coding | 4 | 114372188 | 114683083 | CAMK2D   |
| ENSG00000145354 | 7.202688343 | 7.852510423 | protein_coding | 4 | 103790135 | 103810399 | CISD2    |
| ENSG00000145362 | 6.979904289 | 7.809160246 | protein_coding | 4 | 113739265 | 114309884 | ANK2     |
| ENSG00000145365 | 7.587643674 | 8.108014344 | protein_coding | 4 | 113196783 | 113207059 | TIFA     |
| ENSG00000145375 | 7.363400307 | 7.033288635 | protein_coding | 4 | 123844229 | 124235809 | SPATA5   |
| ENSG00000145384 | 0           | 0.390640832 | protein_coding | 4 | 120238405 | 120243545 | FABP2    |
| ENSG00000145386 | 9.293610409 | 9.463486936 | protein_coding | 4 | 122737599 | 122745087 | CCNA2    |
| ENSG00000145388 | 7.106450572 | 7.278392738 | protein_coding | 4 | 119606523 | 119632201 | METTL14  |
| ENSG00000145390 | 9.088754802 | 9.375714884 | protein_coding | 4 | 120133742 | 120216672 | USP53    |
| ENSG00000145391 | 10.0056898  | 10.21053023 | protein_coding | 4 | 140417243 | 140477928 | SETD7    |
| ENSG00000145414 | 7.277615649 | 7.204272857 | protein_coding | 4 | 164031225 | 164088073 | NAF1     |
| ENSG00000145416 | 4.322773689 | 5.163066621 | protein_coding | 4 | 164445450 | 165305202 | 1-Mar    |
| ENSG00000145423 | 2.471521042 | 2.501982735 | protein_coding | 4 | 154701744 | 154710272 | SFRP2    |
| ENSG00000145425 | 8.974866377 | 9.89993707  | protein_coding | 4 | 152020725 | 152025804 | RPS3A    |
| ENSG00000145428 | 1.799000381 | 2.788380093 | protein_coding | 4 | 154631277 | 154681387 | RNF175   |
| ENSG00000145431 | 8.617676359 | 8.790825214 | protein_coding | 4 | 157681606 | 157892546 | PDGFC    |
| ENSG00000145439 | 7.813830732 | 8.283850589 | protein_coding | 4 | 169784921 | 169931426 | CBR4     |
| ENSG00000145451 | 0.869158192 | 0.950786998 | protein_coding | 4 | 175558065 | 175750465 | GLRA3    |
| ENSG00000145476 | 7.119373418 | 7.607691112 | protein_coding | 4 | 187112674 | 187134616 | CYP4V2   |
| ENSG00000145491 | 3.698846687 | 3.133298822 | protein_coding | 5 | 10441636  | 10472141  | ROPN1L   |

|                 |             |             |                |   |           |           |          |
|-----------------|-------------|-------------|----------------|---|-----------|-----------|----------|
| ENSG00000145494 | 10.23523821 | 10.1891691  | protein_coding | 5 | 1801514   | 1816719   | NDUFS6   |
| ENSG00000145495 | 10.86909148 | 10.27277906 | protein_coding | 5 | 10353815  | 10435491  | 6-Mar    |
| ENSG00000145506 | 6.005279909 | 1.802319292 | protein_coding | 5 | 1008944   | 1039058   | NKD2     |
| ENSG00000145526 | 1.16343121  | 0.390640832 | protein_coding | 5 | 19473060  | 20575982  | CDH18    |
| ENSG00000145536 | 6.738827102 | 7.258020107 | protein_coding | 5 | 5140443   | 5320417   | ADAMTS16 |
| ENSG00000145545 | 8.66103884  | 8.501254594 | protein_coding | 5 | 6633456   | 6669675   | SRD5A1   |
| ENSG00000145555 | 11.64140001 | 10.3997533  | protein_coding | 5 | 16665395  | 16936372  | MYO10    |
| ENSG00000145569 | 4.942865586 | 4.29708397  | protein_coding | 5 | 14581884  | 14615073  | FAM105A  |
| ENSG00000145592 | 12.92204367 | 13.31835675 | protein_coding | 5 | 40825364  | 40835437  | RPL37    |
| ENSG00000145604 | 9.839921696 | 9.393168008 | protein_coding | 5 | 36152091  | 36184421  | SKP2     |
| ENSG00000145623 | 11.91437282 | 11.79695211 | protein_coding | 5 | 38845960  | 38945698  | OSMR     |
| ENSG00000145632 | 10.65946972 | 10.03307035 | protein_coding | 5 | 57749809  | 57756087  | PLK2     |
| ENSG00000145675 | 7.106450572 | 6.850987146 | protein_coding | 5 | 67511548  | 67597649  | PIK3R1   |
| ENSG00000145685 | 9.388297379 | 9.292307546 | protein_coding | 5 | 77781040  | 78065844  | LHFPL2   |
| ENSG00000145687 | 6.196276899 | 6.440109466 | protein_coding | 5 | 80708840  | 81047616  | SSBP2    |
| ENSG00000145700 | 2.928422289 | 3.027231696 | protein_coding | 5 | 74364100  | 74532703  | ANKRD31  |
| ENSG00000145703 | 1.16343121  | 0.950786998 | protein_coding | 5 | 75699074  | 76003957  | IQGAP2   |
| ENSG00000145715 | 9.192269688 | 8.754928172 | protein_coding | 5 | 86563705  | 86688145  | RASA1    |
| ENSG00000145723 | 5.637181576 | 5.545764946 | protein_coding | 5 | 102421704 | 102455855 | GIN1     |
| ENSG00000145725 | 8.605481314 | 8.65607594  | protein_coding | 5 | 102455853 | 102538937 | PPIP5K2  |
| ENSG00000145730 | 10.52187106 | 11.06917952 | protein_coding | 5 | 102089685 | 102366809 | PAM      |
| ENSG00000145734 | 8.783815073 | 8.5772215   | protein_coding | 5 | 70751442  | 70863649  | BDP1     |
| ENSG00000145736 | 3.871730003 | 4.226940739 | protein_coding | 5 | 70330784  | 70363516  | GTF2H2   |
| ENSG00000145740 | 8.629769183 | 8.537928553 | protein_coding | 5 | 68389473  | 68426896  | SLC30A5  |
| ENSG00000145741 | 11.47185804 | 11.68040503 | protein_coding | 5 | 72794233  | 72801460  | BTF3     |
| ENSG00000145743 | 6.502803968 | 6.815578497 | protein_coding | 5 | 107194736 | 107717799 | FBXL17   |
| ENSG00000145757 | 0.499066092 | 0.390640832 | protein_coding | 5 | 94987885  | 95034415  | SPATA9   |
| ENSG00000145777 | 1.16343121  | 0           | protein_coding | 5 | 110405760 | 110413722 | TSLP     |
| ENSG00000145779 | 8.011627561 | 8.104758487 | protein_coding | 5 | 118604387 | 118730294 | TNFAIP8  |
| ENSG00000145780 | 8.857651982 | 8.269383236 | protein_coding | 5 | 114856608 | 114880591 | FEM1C    |
| ENSG00000145781 | 6.887241849 | 6.304782526 | protein_coding | 5 | 115420688 | 115748459 | COMMMD10 |
| ENSG00000145782 | 9.769936332 | 8.588920207 | protein_coding | 5 | 115163893 | 115177555 | ATG12    |
| ENSG00000145794 | 1.16343121  | 1.667587519 | protein_coding | 5 | 126626523 | 126801429 | MEGF10   |
| ENSG00000145817 | 8.876804446 | 8.697730375 | protein_coding | 5 | 143537723 | 143550278 | YIPF5    |
| ENSG00000145819 | 8.531675665 | 7.502758994 | protein_coding | 5 | 142149949 | 142608576 | ARHGAP26 |
| ENSG00000145824 | 0.499066092 | 0.697730409 | protein_coding | 5 | 134906373 | 134914969 | CXCL14   |
| ENSG00000145833 | 10.33785675 | 10.4503311  | protein_coding | 5 | 134094469 | 134190823 | DDX46    |
| ENSG00000145860 | 9.868906425 | 10.74407487 | protein_coding | 5 | 158584417 | 158637061 | RNF145   |
| ENSG00000145861 | 0           | 0.950786998 | protein_coding | 5 | 159774758 | 159797648 | C1QTNF2  |
| ENSG00000145868 | 7.842689815 | 7.832967122 | protein_coding | 5 | 147763498 | 147822399 | FBXO38   |
| ENSG00000145882 | 7.474855471 | 7.722599249 | protein_coding | 5 | 148737570 | 148749216 | PCYOX1L  |
| ENSG00000145888 | 0.499066092 | 0.390640832 | protein_coding | 5 | 151202074 | 151304403 | GLRA1    |
| ENSG00000145901 | 11.93309658 | 11.97210415 | protein_coding | 5 | 150409506 | 150473138 | TNIP1    |
| ENSG00000145907 | 11.4781421  | 11.31226726 | protein_coding | 5 | 151150606 | 151192346 | G3BP1    |
| ENSG00000145908 | 7.058051099 | 7.357122767 | protein_coding | 5 | 150273954 | 150284545 | ZNF300   |
| ENSG00000145911 | 5.91922012  | 5.855704078 | protein_coding | 5 | 177540444 | 177553088 | N4BP3    |
| ENSG00000145912 | 8.596266901 | 9.05820621  | protein_coding | 5 | 177576461 | 177580968 | NHP2     |
| ENSG00000145916 | 7.740446424 | 7.93548844  | protein_coding | 5 | 177557997 | 177577566 | RMND5B   |
| ENSG00000145919 | 9.135091581 | 9.339469783 | protein_coding | 5 | 173034517 | 173043663 | BOD1     |
| ENSG00000145920 | 0           | 1.518964905 | protein_coding | 5 | 175223313 | 175311023 | CPLX2    |
| ENSG00000145934 | 4.75690578  | 4.42790041  | protein_coding | 5 | 166711804 | 167691162 | ODZ2     |
| ENSG00000145945 | 7.938164312 | 8.242970684 | protein_coding | 6 | 3849620   | 3851551   | FAM50B   |
| ENSG00000145949 | 3.698846687 | 4.710890357 | protein_coding | 6 | 2663863   | 2751200   | MYLK4    |
| ENSG00000145965 | 0.869158192 | 2.420525079 | protein_coding | 6 | 3982909   | 3984372   |          |
| ENSG00000145975 | 1.407729925 | 1.925536307 | protein_coding | 6 | 4049668   | 4087578   | C6orf146 |
| ENSG00000145979 | 7.049074049 | 7.551403417 | protein_coding | 6 | 13266774  | 13328776  | TBC1D7   |
| ENSG00000145982 | 7.916116295 | 8.034631177 | protein_coding | 6 | 5261584   | 5771816   | FARS2    |
| ENSG00000145990 | 6.825495146 | 6.440109466 | protein_coding | 6 | 13358062  | 13487787  | GFOD1    |
| ENSG00000145996 | 7.765324926 | 7.623703032 | protein_coding | 6 | 20534688  | 21232635  | CDKAL1   |
| ENSG00000146001 | 2.928422289 | 2.144285137 | pseudogene     | 5 | 140613938 | 140617101 | PCDHB18  |
| ENSG00000146005 | 2.762599152 | 2.501982735 | protein_coding | 5 | 139175406 | 139224051 | PSD2     |
| ENSG00000146006 | 0.869158192 | 0.390640832 | protein_coding | 5 | 138208179 | 138211057 | LRRTM2   |
| ENSG00000146007 | 9.183066967 | 9.097229165 | protein_coding | 5 | 140079747 | 140086266 | ZMAT2    |

|                 |             |             |                  |   |           |           |          |
|-----------------|-------------|-------------|------------------|---|-----------|-----------|----------|
| ENSG00000146013 | 1.407729925 | 1.16600992  | protein_coding   | 5 | 137588068 | 137610360 | GFRA3    |
| ENSG00000146021 | 4.712111592 | 3.608232228 | protein_coding   | 5 | 136953189 | 137071779 | KLHL3    |
| ENSG00000146054 | 5.649112675 | 5.871116342 | protein_coding   | 5 | 180620924 | 180632293 | TRIM7    |
| ENSG00000146063 | 8.787867896 | 8.890616425 | protein_coding   | 5 | 180649499 | 180662809 | TRIM41   |
| ENSG00000146066 | 7.792473675 | 8.253299769 | protein_coding   | 5 | 175815748 | 175816772 | HIGD2A   |
| ENSG00000146067 | 8.401952457 | 8.732953241 | protein_coding   | 5 | 176946789 | 176981542 | FAM193B  |
| ENSG00000146072 | 10.44567929 | 8.911264037 | protein_coding   | 6 | 47199268  | 47277641  | TNFRSF21 |
| ENSG00000146083 | 9.74513791  | 9.537194665 | protein_coding   | 5 | 175953698 | 175965026 | RNF44    |
| ENSG00000146085 | 7.556308086 | 7.933654619 | protein_coding   | 6 | 49398073  | 49430904  | MUT      |
| ENSG00000146090 | 5.4452544   | 5.988823159 | protein_coding   | 5 | 179527795 | 179636153 | RASGEF1C |
| ENSG00000146094 | 4.618121645 | 5.901455548 | protein_coding   | 5 | 176928908 | 176938275 | DOK3     |
| ENSG00000146109 | 8.3053626   | 8.605140645 | protein_coding   | 6 | 26597180  | 26600278  | ABT1     |
| ENSG00000146112 | 10.28196264 | 10.54195238 | protein_coding   | 6 | 30644166  | 30655672  | PPP1R18  |
| ENSG00000146143 | 7.985986001 | 7.805153958 | processed_transc | 6 | 57179603  | 57513375  | PRIM2    |
| ENSG00000146147 | 0           | 0.390640832 | protein_coding   | 6 | 53794780  | 54131078  | MLIP     |
| ENSG00000146192 | 0.869158192 | 0.390640832 | protein_coding   | 6 | 36973422  | 36996846  | FGD2     |
| ENSG00000146197 | 3.274897671 | 4.048652948 | protein_coding   | 6 | 35182190  | 35220856  | SCUBE3   |
| ENSG00000146205 | 5.858855738 | 5.43605125  | protein_coding   | 2 | 242127924 | 242164792 | ANO7     |
| ENSG00000146215 | 0.499066092 | 1.667587519 | protein_coding   | 6 | 43267448  | 43276535  | CRIP3    |
| ENSG00000146216 | 1.16343121  | 2.242360793 | protein_coding   | 6 | 43211222  | 43255997  | TTBK1    |
| ENSG00000146221 | 0.869158192 | 0.390640832 | protein_coding   | 6 | 44246480  | 44265458  | TCTE1    |
| ENSG00000146223 | 10.89687643 | 11.06415941 | protein_coding   | 6 | 42847356  | 42857663  | RPL7L1   |
| ENSG00000146232 | 7.993024472 | 8.256237404 | protein_coding   | 6 | 44225919  | 44233500  | NFKBIE   |
| ENSG00000146233 | 3.335220907 | 4.202780776 | protein_coding   | 6 | 46517541  | 46620523  | CYP39A1  |
| ENSG00000146242 | 9.824221725 | 10.21015154 | protein_coding   | 6 | 83072923  | 83080545  | TPBG     |
| ENSG00000146243 | 3.652182994 | 3.453019579 | protein_coding   | 6 | 79577189  | 79608320  | IRAK1BP1 |
| ENSG00000146247 | 7.795160661 | 8.210017866 | protein_coding   | 6 | 79650263  | 79787953  | PHIP     |
| ENSG00000146250 | 0           | 0.950786998 | protein_coding   | 6 | 84222194  | 84235423  | PRSS35   |
| ENSG00000146263 | 8.680062001 | 8.501254594 | protein_coding   | 6 | 97590037  | 97731093  | MMS22L   |
| ENSG00000146267 | 2.671945279 | 2.788380093 | protein_coding   | 6 | 99728536  | 99797938  | C6orf168 |
| ENSG00000146276 | 0           | 0.390640832 | protein_coding   | 6 | 89887220  | 89940997  | GABRR1   |
| ENSG00000146278 | 9.157191483 | 9.300868647 | protein_coding   | 6 | 89790470  | 89794879  | PNRC1    |
| ENSG00000146281 | 8.913126744 | 8.925174415 | protein_coding   | 6 | 89855769  | 89875284  | PM20D2   |
| ENSG00000146282 | 8.177331204 | 8.467431533 | protein_coding   | 6 | 88224096  | 88299735  | RARS2    |
| ENSG00000146285 | 0.869158192 | 0           | protein_coding   | 6 | 108025308 | 108145521 | SCML4    |
| ENSG00000146350 | 5.613019223 | 5.953060722 | protein_coding   | 6 | 121400640 | 121655891 | C6orf170 |
| ENSG00000146374 | 0           | 0.390640832 | protein_coding   | 6 | 127439749 | 127518910 | RSPO3    |
| ENSG00000146376 | 8.000028772 | 7.896480033 | protein_coding   | 6 | 129897277 | 130031370 | ARHGAP18 |
| ENSG00000146386 | 8.12275821  | 8.15284125  | protein_coding   | 6 | 139349819 | 139364439 | C6orf115 |
| ENSG00000146399 | 0.869158192 | 0.950786998 | protein_coding   | 6 | 132966123 | 132967142 | TAAR1    |
| ENSG00000146409 | 7.737655476 | 7.902117654 | protein_coding   | 6 | 133090507 | 133119747 | C6orf192 |
| ENSG00000146410 | 7.071412799 | 7.053694091 | protein_coding   | 6 | 136552162 | 136571473 | FAM54A   |
| ENSG00000146411 | 5.054730169 | 5.125003832 | protein_coding   | 6 | 134309835 | 134373774 | SLC2A12  |
| ENSG00000146414 | 7.709444959 | 7.93548844  | protein_coding   | 6 | 146185381 | 146285559 | SHPRH    |
| ENSG00000146416 | 7.945439403 | 7.281279771 | protein_coding   | 6 | 143381633 | 143661441 | AIG1     |
| ENSG00000146425 | 8.855079001 | 9.138412238 | protein_coding   | 6 | 159057506 | 159065771 | DYNLT1   |
| ENSG00000146426 | 6.407685389 | 6.587342979 | protein_coding   | 6 | 155153831 | 155578857 | TIAM2    |
| ENSG00000146433 | 9.044272373 | 9.11432951  | protein_coding   | 6 | 158957466 | 159056460 | TMEM181  |
| ENSG00000146453 | 1.16343121  | 2.039052734 | protein_coding   | 6 | 160221301 | 160241736 | PNLDC1   |
| ENSG00000146457 | 9.886651823 | 9.945238564 | protein_coding   | 6 | 160146617 | 160177351 | WTAP     |
| ENSG00000146463 | 8.941297632 | 9.145559356 | protein_coding   | 1 | 35734568  | 35887659  | ZMYM4    |
| ENSG00000146476 | 7.388527525 | 7.467704891 | protein_coding   | 6 | 151773422 | 151791236 | C6orf211 |
| ENSG00000146477 | 5.649112675 | 5.271576845 | protein_coding   | 6 | 160769300 | 160876014 | SLC22A3  |
| ENSG00000146521 | 2.238690726 | 1.353254395 | protein_coding   | 6 | 168185217 | 168197539 | C6orf123 |
| ENSG00000146530 | 0.869158192 | 0           | protein_coding   | 7 | 12370511  | 12443567  | VWDE     |
| ENSG00000146535 | 11.36988247 | 10.69485148 | protein_coding   | 7 | 2767746   | 2883958   | GNA12    |
| ENSG00000146540 | 9.899819083 | 9.740202333 | protein_coding   | 7 | 1036623   | 1177896   | C7orf50  |
| ENSG00000146555 | 4.712111592 | 6.037446454 | protein_coding   | 7 | 3341080   | 4308632   | SDK1     |
| ENSG00000146556 | 5.158541613 | 4.917990497 | pseudogene       | 2 | 114341664 | 114356655 | WASH2P   |
| ENSG00000146574 | 5.795854912 | 5.66550919  | protein_coding   | 7 | 6836440   | 6866401   | CCZ1B    |
| ENSG00000146576 | 8.33889698  | 8.041458772 | protein_coding   | 7 | 6629648   | 6648357   | C7orf26  |
| ENSG00000146587 | 8.577659618 | 8.162268448 | protein_coding   | 7 | 5023349   | 5112854   | RBAK     |
| ENSG00000146592 | 9.079967361 | 8.93712253  | protein_coding   | 7 | 28338940  | 28865511  | CREB5    |



|                 |             |             |                 |    |           |           |           |
|-----------------|-------------|-------------|-----------------|----|-----------|-----------|-----------|
| ENSG00000146648 | 11.50074649 | 10.79874338 | protein_coding  | 7  | 55086714  | 55324313  | EGFR      |
| ENSG00000146666 | 2.10647801  | 0.950786998 | antisense       | 7  | 47801074  | 47806370  | LINC00525 |
| ENSG00000146670 | 9.906668554 | 10.18493575 | protein_coding  | 11 | 64833772  | 64851636  | CDC45     |
| ENSG00000146674 | 6.528867325 | 6.795524906 | protein_coding  | 7  | 45951850  | 45961473  | IGFBP3    |
| ENSG00000146676 | 10.38588427 | 10.21770649 | protein_coding  | 7  | 44915896  | 44924960  | PURB      |
| ENSG00000146677 | 3.78787645  | 4.202780776 | pseudogene      | 7  | 44507441  | 44507939  |           |
| ENSG00000146700 | 3.78787645  | 3.845183986 | protein_coding  | 7  | 76018651  | 76039012  | SRCRB4D   |
| ENSG00000146701 | 12.0587492  | 11.76495242 | protein_coding  | 7  | 75677369  | 75696826  | MDH2      |
| ENSG00000146707 | 5.239686603 | 5.175534283 | protein_coding  | 7  | 76239303  | 76256578  | POMZP3    |
| ENSG00000146722 | 3.989024711 | 2.971122874 | pseudogene      | 7  | 75021229  | 75024708  |           |
| ENSG00000146729 | 8.75650134  | 8.542748725 | protein_coding  | 7  | 56019486  | 56067874  | GBAS      |
| ENSG00000146731 | 11.81725615 | 11.69495762 | protein_coding  | 7  | 56119323  | 56131682  | CCT6A     |
| ENSG00000146733 | 9.094219895 | 8.927940468 | protein_coding  | 7  | 56078744  | 56119297  | PSPH      |
| ENSG00000146755 | 1.407729925 | 0           | protein_coding  | 7  | 72726535  | 72742085  | TRIM50    |
| ENSG00000146757 | 7.356139979 | 6.45552765  | protein_coding  | 7  | 64838712  | 64866038  | ZNF92     |
| ENSG00000146776 | 6.275383355 | 5.824376633 | protein_coding  | 7  | 105245514 | 105517050 | ATXN7L1   |
| ENSG00000146802 | 7.35977471  | 7.304170377 | protein_coding  | 7  | 112405787 | 112430647 | TMEM168   |
| ENSG00000146826 | 7.648344073 | 7.381542895 | protein_coding  | 7  | 99752043  | 99756338  | C7orf43   |
| ENSG00000146828 | 8.855079001 | 7.743685008 | protein_coding  | 7  | 100424442 | 100464631 | SLC12A9   |
| ENSG00000146830 | 10.62363768 | 10.30930298 | protein_coding  | 7  | 100277130 | 100287071 | GIGYF1    |
| ENSG00000146833 | 8.742648075 | 8.38394126  | protein_coding  | 7  | 99474581  | 99517223  | TRIM4     |
| ENSG00000146834 | 10.1172615  | 10.12954213 | protein_coding  | 7  | 100026413 | 100031741 | MEPCE     |
| ENSG00000146839 | 0.869158192 | 0           | polymorphic_pse | 7  | 100331249 | 100395419 | ZAN       |
| ENSG00000146842 | 8.620709081 | 8.269383236 | protein_coding  | 7  | 129804555 | 129847610 | TMEM209   |
| ENSG00000146856 | 3.146112541 | 3.845183986 | protein_coding  | 7  | 134671259 | 134832715 | AGBL3     |
| ENSG00000146858 | 6.548110424 | 6.16171561  | protein_coding  | 7  | 138707126 | 138720775 | ZC3HAV1L  |
| ENSG00000146859 | 5.938793061 | 5.583678991 | protein_coding  | 7  | 134832824 | 134850650 | TMEM140   |
| ENSG00000146872 | 7.821758815 | 7.973469823 | protein_coding  | 17 | 60556386  | 60692839  | TLK2      |
| ENSG00000146904 | 5.498982484 | 3.368666104 | protein_coding  | 7  | 143087382 | 143105985 | EPHA1     |
| ENSG00000146909 | 9.124447632 | 8.916844293 | protein_coding  | 7  | 156742417 | 156765876 | NOM1      |
| ENSG00000146918 | 9.877172512 | 9.507299068 | protein_coding  | 7  | 158424003 | 158497520 | NCAPG2    |
| ENSG00000146950 | 4.381167248 | 4.640685763 | protein_coding  | X  | 9754496   | 9917483   | SHROOM2   |
| ENSG00000146955 | 1.616589159 | 0           | protein_coding  | 7  | 140103843 | 140126050 | RAB19     |
| ENSG00000146963 | 10.09453648 | 9.88340693  | protein_coding  | 7  | 139025105 | 139108198 | LUC7L2    |
| ENSG00000146966 | 7.549958459 | 7.522414019 | protein_coding  | 7  | 140218220 | 140373793 | DENND2A   |
| ENSG00000147003 | 0.869158192 | 0.950786998 | protein_coding  | X  | 15645441  | 15683154  | TMEM27    |
| ENSG00000147010 | 10.65946972 | 10.76046128 | protein_coding  | X  | 19552083  | 19905719  | SH3KBP1   |
| ENSG00000147027 | 6.716321419 | 8.519708104 | protein_coding  | X  | 34645181  | 34675405  | TMEM47    |
| ENSG00000147036 | 0           | 0.390640832 | protein_coding  | X  | 37430822  | 37543716  | LANCL3    |
| ENSG00000147041 | 0.869158192 | 0.950786998 | protein_coding  | X  | 37865835  | 37988072  | SYTL5     |
| ENSG00000147044 | 9.274481564 | 9.007676788 | protein_coding  | X  | 41374187  | 41782716  | CASK      |
| ENSG00000147050 | 8.577659618 | 8.826839049 | protein_coding  | X  | 44732423  | 44971847  | KDM6A     |
| ENSG00000147059 | 1.407729925 | 2.501982735 | protein_coding  | X  | 57160963  | 57164058  | SPIN2A    |
| ENSG00000147065 | 13.63376177 | 13.78025525 | protein_coding  | X  | 64887537  | 64961791  | MSN       |
| ENSG00000147082 | 3.554067925 | 4.17820932  | protein_coding  | X  | 49967364  | 50094909  | CCNB3     |
| ENSG00000147099 | 7.878603882 | 7.883239271 | protein_coding  | X  | 71549366  | 71792953  | HDAC8     |
| ENSG00000147100 | 9.324628822 | 9.522019224 | protein_coding  | X  | 73640638  | 73753752  | SLC16A2   |
| ENSG00000147117 | 1.407729925 | 1.16600992  | protein_coding  | X  | 47229982  | 47273704  | ZNF157    |
| ENSG00000147118 | 6.882196036 | 7.429177016 | protein_coding  | X  | 47834250  | 47863377  | ZNF182    |
| ENSG00000147119 | 6.462804234 | 6.686500471 | protein_coding  | X  | 46433219  | 46457843  | CHST7     |
| ENSG00000147121 | 6.676071387 | 7.429177016 | protein_coding  | X  | 46306292  | 46356857  | ZNF673    |
| ENSG00000147123 | 9.369490093 | 10.24753675 | protein_coding  | X  | 47001615  | 47004903  | NDUFB11   |
| ENSG00000147124 | 7.165790811 | 7.69255166  | protein_coding  | X  | 47305278  | 47342345  | ZNF41     |
| ENSG00000147127 | 2.238690726 | 2.039052734 | protein_coding  | X  | 69501943  | 69504852  | RAB41     |
| ENSG00000147130 | 9.824879313 | 9.937938881 | protein_coding  | X  | 70459474  | 70474996  | ZMYM3     |
| ENSG00000147133 | 9.011142793 | 9.106211763 | protein_coding  | X  | 70586114  | 70752224  | TAF1      |
| ENSG00000147140 | 12.07127337 | 12.18390949 | protein_coding  | X  | 70503042  | 70521018  | NONO      |
| ENSG00000147144 | 6.320845526 | 4.075511708 | protein_coding  | X  | 48916514  | 48927509  | CCDC120   |
| ENSG00000147145 | 0.499066092 | 0.390640832 | protein_coding  | X  | 78003206  | 78012591  | LPAR4     |
| ENSG00000147155 | 9.991116523 | 9.228672011 | protein_coding  | X  | 48379546  | 48387104  | EBP       |
| ENSG00000147160 | 1.960915222 | 2.039052734 | protein_coding  | X  | 69260392  | 69269788  | AWAT2     |
| ENSG00000147162 | 11.7230384  | 12.04579081 | protein_coding  | X  | 70752933  | 70795747  | OGT       |
| ENSG00000147164 | 9.40334477  | 9.336696989 | protein_coding  | X  | 70279094  | 70288273  | SNX12     |

|                 |             |             |                  |   |           |           |            |
|-----------------|-------------|-------------|------------------|---|-----------|-----------|------------|
| ENSG00000147166 | 3.211941663 | 3.781359661 | protein_coding   | X | 70521584  | 70525221  | ITGB1BP2   |
| ENSG00000147168 | 0.499066092 | 0           | protein_coding   | X | 70327254  | 70331958  | IL2RG      |
| ENSG00000147174 | 4.75690578  | 6.002883551 | protein_coding   | X | 70798261  | 70833433  | ACRC       |
| ENSG00000147202 | 7.903720218 | 7.894595919 | protein_coding   | X | 95939662  | 96859996  | DIAPH2     |
| ENSG00000147206 | 1.16343121  | 2.912743273 | protein_coding   | X | 102330738 | 102348157 | NXF3       |
| ENSG00000147223 | 0           | 0.697730409 | protein_coding   | X | 106143293 | 106146565 | RIPPLY1    |
| ENSG00000147224 | 10.11779823 | 10.03862623 | protein_coding   | X | 106871737 | 106894256 | PRPS1      |
| ENSG00000147231 | 3.146112541 | 6.1803943   | protein_coding   | X | 105855160 | 105922672 | CXorf57    |
| ENSG00000147234 | 2.762599152 | 1.667587519 | protein_coding   | X | 106765680 | 106848481 | FRMPD3     |
| ENSG00000147251 | 5.81716234  | 7.161039629 | protein_coding   | X | 117629861 | 117820126 | DOCK11     |
| ENSG00000147255 | 5.301468762 | 5.372493443 | protein_coding   | X | 130407480 | 130533677 | IGSF1      |
| ENSG00000147257 | 1.16343121  | 0.697730409 | protein_coding   | X | 132669773 | 133119922 | GPC3       |
| ENSG00000147274 | 10.55514466 | 10.39576264 | protein_coding   | X | 135930163 | 135962923 | RBMX       |
| ENSG00000147316 | 7.30049066  | 7.167295693 | protein_coding   | 8 | 6264113   | 6501144   | MCPH1      |
| ENSG00000147324 | 8.045874708 | 7.694718794 | protein_coding   | 8 | 8640864   | 8751155   | MFHAS1     |
| ENSG00000147364 | 7.035502862 | 7.607691112 | protein_coding   | 8 | 356428    | 421225    | FBXO25     |
| ENSG00000147382 | 7.80585884  | 7.860254213 | protein_coding   | X | 152853377 | 152864707 | FAM58A     |
| ENSG00000147383 | 8.972494341 | 8.628000846 | protein_coding   | X | 151999511 | 152038273 | NSDHL      |
| ENSG00000147394 | 7.210761201 | 5.294620694 | protein_coding   | X | 152082986 | 152142025 | ZNF185     |
| ENSG00000147400 | 8.810621286 | 9.167571071 | protein_coding   | X | 151995517 | 151999321 | CETN2      |
| ENSG00000147403 | 12.26773372 | 12.51831426 | protein_coding   | X | 153618315 | 153637504 | RPL10      |
| ENSG00000147408 | 7.017207048 | 6.210997888 | protein_coding   | 8 | 19261672  | 19615540  | CSGALNACT1 |
| ENSG00000147416 | 9.519199923 | 10.00409192 | protein_coding   | 8 | 20054878  | 20084330  | ATP6V1B2   |
| ENSG00000147419 | 8.576098123 | 8.695567763 | protein_coding   | 8 | 27590835  | 27630170  | CCDC25     |
| ENSG00000147421 | 6.414691513 | 6.877938671 | protein_coding   | 8 | 28747911  | 28922281  | HMBOX1     |
| ENSG00000147437 | 3.393122761 | 3.608232228 | protein_coding   | 8 | 25276776  | 25282170  | GNRH1      |
| ENSG00000147439 | 7.234712227 | 7.281279771 | protein_coding   | 8 | 22477931  | 22526661  | BIN3       |
| ENSG00000147443 | 0           | 0.390640832 | protein_coding   | 8 | 21766384  | 21771371  | DOK2       |
| ENSG00000147454 | 10.85402962 | 11.37019227 | protein_coding   | 8 | 23386318  | 23432976  | SLC25A37   |
| ENSG00000147457 | 9.145657575 | 9.231660172 | protein_coding   | 8 | 23101150  | 23119512  | CHMP7      |
| ENSG00000147459 | 9.862515511 | 9.534777296 | protein_coding   | 8 | 25042238  | 25275598  | DOCK5      |
| ENSG00000147465 | 1.16343121  | 1.16600992  | protein_coding   | 8 | 38001167  | 38008783  | STAR       |
| ENSG00000147471 | 8.020839917 | 7.862183683 | protein_coding   | 8 | 37620111  | 37637283  | PROSC      |
| ENSG00000147475 | 9.093128531 | 9.025004422 | protein_coding   | 8 | 37594117  | 37616619  | ERLIN2     |
| ENSG00000147481 | 0           | 0.390640832 | protein_coding   | 8 | 50822349  | 51706678  | SNTG1      |
| ENSG00000147485 | 0           | 0.697730409 | protein_coding   | 8 | 52232138  | 52722005  | PXDNL      |
| ENSG00000147509 | 6.496213887 | 6.365895578 | protein_coding   | 8 | 54764368  | 54871863  | RGS20      |
| ENSG00000147526 | 8.826469148 | 9.071609459 | protein_coding   | 8 | 38585704  | 38710546  | TACC1      |
| ENSG00000147533 | 8.237837231 | 8.824861692 | protein_coding   | 8 | 41347915  | 41368499  | GOLGA7     |
| ENSG00000147535 | 7.258272112 | 7.679480043 | protein_coding   | 8 | 38120648  | 38126761  | PPAPDC1B   |
| ENSG00000147536 | 8.032273249 | 8.40394723  | protein_coding   | 8 | 41386725  | 41402565  | GINS4      |
| ENSG00000147548 | 8.771587845 | 8.769394346 | protein_coding   | 8 | 38132544  | 38239790  | WHSC1L1    |
| ENSG00000147570 | 0.499066092 | 0           | protein_coding   | 8 | 66933795  | 67012751  | DNAJC5B    |
| ENSG00000147571 | 0.499066092 | 0           | protein_coding   | 8 | 67088620  | 67090960  | CRH        |
| ENSG00000147573 | 6.014532757 | 5.647721597 | protein_coding   | 8 | 67039131  | 67087720  | TRIM55     |
| ENSG00000147576 | 3.004694206 | 3.368666104 | protein_coding   | 8 | 67342420  | 67383836  | ADHFE1     |
| ENSG00000147586 | 7.206730419 | 7.103479673 | protein_coding   | 8 | 80830952  | 80942524  | MRPS28     |
| ENSG00000147592 | 6.861834435 | 6.900645892 | protein_coding   | 8 | 71547553  | 71581409  | LACTB2     |
| ENSG00000147601 | 7.23866569  | 7.116470702 | protein_coding   | 8 | 73921099  | 73960357  | TERF1      |
| ENSG00000147604 | 7.44778847  | 7.57041104  | protein_coding   | 8 | 74202506  | 74208024  | RPL7       |
| ENSG00000147606 | 1.799000381 | 2.039052734 | protein_coding   | 8 | 92221722  | 92410378  | SLC26A7    |
| ENSG00000147614 | 1.407729925 | 1.518964905 | protein_coding   | 8 | 86999552  | 87166457  | ATP6V0D2   |
| ENSG00000147642 | 5.090170488 | 2.851901313 | protein_coding   | 8 | 110586207 | 110704020 | SYBU       |
| ENSG00000147647 | 0.499066092 | 1.353254395 | protein_coding   | 8 | 105391652 | 105479281 | DPYS       |
| ENSG00000147649 | 10.79920289 | 10.41067104 | protein_coding   | 8 | 98656407  | 98740998  | MTDH       |
| ENSG00000147650 | 8.325948295 | 8.542748725 | protein_coding   | 8 | 105501459 | 105601417 | LRP12      |
| ENSG00000147654 | 6.469548347 | 6.703819132 | protein_coding   | 8 | 110551940 | 110578225 | EBAG9      |
| ENSG00000147655 | 0           | 0.390640832 | protein_coding   | 8 | 108911544 | 109095913 | RSPO2      |
| ENSG00000147669 | 7.60612345  | 8.022604578 | protein_coding   | 8 | 101162812 | 101166230 | POLR2K     |
| ENSG00000147676 | 8.965354743 | 3.081239798 | processed_transc | 8 | 120177273 | 120257913 | MAL2       |
| ENSG00000147677 | 10.65355917 | 10.5464592  | protein_coding   | 8 | 117654369 | 117779164 | EIF3H      |
| ENSG00000147679 | 7.110771062 | 6.746227492 | protein_coding   | 8 | 117778742 | 117861702 | UTP23      |
| ENSG00000147684 | 9.353172091 | 9.636359306 | protein_coding   | 8 | 125551344 | 125580751 | NDUFB9     |

|                 |             |             |                |   |           |           |          |
|-----------------|-------------|-------------|----------------|---|-----------|-----------|----------|
| ENSG00000147687 | 7.23866569  | 7.167295693 | protein_coding | 8 | 125500726 | 125551699 | TATDN1   |
| ENSG00000147689 | 10.80488028 | 9.423538659 | protein_coding | 8 | 124191200 | 124222314 | FAM83A   |
| ENSG00000147697 | 2.238690726 | 1.518964905 | protein_coding | 8 | 130760442 | 130799134 | GSDMC    |
| ENSG00000147789 | 7.07583934  | 7.37615181  | protein_coding | 8 | 146052849 | 146072894 | ZNF7     |
| ENSG00000147799 | 7.935731106 | 7.63953919  | protein_coding | 8 | 145754563 | 145911194 | ARHGAP39 |
| ENSG00000147804 | 8.593182305 | 7.745776733 | protein_coding | 8 | 145635126 | 145642279 | SLC39A4  |
| ENSG00000147813 | 7.37781226  | 7.346135265 | protein_coding | 8 | 144656955 | 144660819 | NAPRT1   |
| ENSG00000147852 | 4.409500985 | 3.027231696 | protein_coding | 9 | 2621834   | 2654480   | VLDLR    |
| ENSG00000147853 | 7.409722215 | 7.56568256  | protein_coding | 9 | 4711155   | 4742043   | AK3      |
| ENSG00000147854 | 7.811178326 | 8.051639961 | protein_coding | 9 | 6413151   | 6507054   | UHRF2    |
| ENSG00000147862 | 8.364450825 | 8.170077662 | protein_coding | 9 | 14081842  | 14398982  | NFIB     |
| ENSG00000147869 | 0.499066092 | 1.518964905 | protein_coding | 9 | 14719722  | 14722715  | CER1     |
| ENSG00000147872 | 9.374888667 | 9.842944292 | protein_coding | 9 | 19108373  | 19149288  | PLIN2    |
| ENSG00000147874 | 8.02999382  | 7.989446368 | protein_coding | 9 | 19053141  | 19103117  | HAUS6    |
| ENSG00000147883 | 8.53810609  | 7.756190105 | protein_coding | 9 | 22002902  | 22009280  | CDKN2B   |
| ENSG00000147889 | 7.827020104 | 7.93548844  | protein_coding | 9 | 21967751  | 21995300  | CDKN2A   |
| ENSG00000147894 | 5.239686603 | 5.236305879 | protein_coding | 9 | 27546544  | 27573864  | C9orf72  |
| ENSG00000147905 | 8.116326397 | 8.219079902 | protein_coding | 9 | 37120536  | 37358146  | ZCCHC7   |
| ENSG00000147912 | 5.054730169 | 5.35066967  | protein_coding | 9 | 37510889  | 37588871  | FBXO10   |
| ENSG00000147955 | 10.59578202 | 10.35386622 | protein_coding | 9 | 34634719  | 34637806  | SIGMAR1  |
| ENSG00000147996 | 5.175139844 | 5.393992    | protein_coding | 9 | 70432004  | 70497240  | CBWD5    |
| ENSG00000148019 | 8.944931872 | 9.42875586  | protein_coding | 9 | 80850978  | 80894606  | CEP78    |
| ENSG00000148053 | 0.499066092 | 2.039052734 | protein_coding | 9 | 87283466  | 87638505  | NTRK2    |
| ENSG00000148057 | 4.689181911 | 5.35066967  | protein_coding | 9 | 86237964  | 86259045  | C9orf103 |
| ENSG00000148082 | 4.642199401 | 3.368666104 | protein_coding | 9 | 91628060  | 91793682  | SHC3     |
| ENSG00000148090 | 6.050961887 | 6.408769788 | protein_coding | 9 | 93976097  | 94124195  | AUH      |
| ENSG00000148110 | 9.849648119 | 9.782588703 | protein_coding | 9 | 97136833  | 97223324  | HIATL1   |
| ENSG00000148120 | 8.366258896 | 8.103127799 | protein_coding | 9 | 97488983  | 97849441  | C9orf3   |
| ENSG00000148143 | 9.743747641 | 9.84538481  | protein_coding | 9 | 109625378 | 109775915 | ZNF462   |
| ENSG00000148153 | 6.984620223 | 6.862599506 | protein_coding | 9 | 115448786 | 115480516 | C9orf80  |
| ENSG00000148154 | 11.18351346 | 11.26492165 | protein_coding | 9 | 114659046 | 114697649 | UGCG     |
| ENSG00000148156 | 0           | 0.697730409 | protein_coding | 9 | 111616871 | 111619239 | ACTL7B   |
| ENSG00000148158 | 9.122309386 | 8.705274089 | protein_coding | 9 | 115513118 | 115637267 | SNX30    |
| ENSG00000148175 | 10.38454676 | 9.76722557  | protein_coding | 9 | 124101355 | 124132531 | STOM     |
| ENSG00000148180 | 8.876804446 | 8.048254208 | protein_coding | 9 | 123970075 | 124095121 | GSN      |
| ENSG00000148187 | 8.680062001 | 8.680338024 | protein_coding | 9 | 125026882 | 125085743 | MRRF     |
| ENSG00000148200 | 7.165790811 | 5.446377228 | protein_coding | 9 | 127279888 | 127533589 | NR6A1    |
| ENSG00000148204 | 2.57521082  | 2.420525079 | protein_coding | 9 | 126118449 | 126142603 | CRB2     |
| ENSG00000148215 | 0.499066092 | 0           | protein_coding | 9 | 125551150 | 125552237 | OR5C1    |
| ENSG00000148218 | 8.650690744 | 8.507432028 | protein_coding | 9 | 116148597 | 116163613 | ALAD     |
| ENSG00000148219 | 5.512107582 | 5.84793576  | protein_coding | 9 | 119187504 | 120177348 | ASTN2    |
| ENSG00000148225 | 3.603959378 | 3.845183986 | protein_coding | 9 | 116077951 | 116102578 | WDR31    |
| ENSG00000148229 | 10.20170799 | 10.45704918 | protein_coding | 9 | 116169515 | 116172952 | POLE3    |
| ENSG00000148248 | 12.17716469 | 12.14659772 | protein_coding | 9 | 136228325 | 136242970 | SURF4    |
| ENSG00000148288 | 2.762599152 | 0.697730409 | protein_coding | 9 | 136028340 | 136039332 | GBGT1    |
| ENSG00000148290 | 7.8607586   | 8.029489191 | protein_coding | 9 | 136218610 | 136223552 | SURF1    |
| ENSG00000148291 | 7.430610036 | 7.228408053 | protein_coding | 9 | 136223428 | 136228045 | SURF2    |
| ENSG00000148296 | 9.409495425 | 9.547423533 | protein_coding | 9 | 136197552 | 136203235 | SURF6    |
| ENSG00000148297 | 9.260938843 | 9.456479577 | protein_coding | 9 | 136205160 | 136214986 | MED22    |
| ENSG00000148300 | 9.014605485 | 8.884933592 | protein_coding | 9 | 136271186 | 136283164 | REXO4    |
| ENSG00000148303 | 11.92499232 | 12.23905629 | protein_coding | 9 | 136215069 | 136218281 | RPL7A    |
| ENSG00000148308 | 10.25000281 | 10.19759874 | protein_coding | 9 | 135906076 | 135933888 | GTF3C5   |
| ENSG00000148331 | 8.596266901 | 8.254769334 | protein_coding | 9 | 132399171 | 132404444 | ASB6     |
| ENSG00000148334 | 10.82210899 | 10.72670616 | protein_coding | 9 | 130882972 | 130890741 | PTGES2   |
| ENSG00000148335 | 9.571074621 | 9.477400367 | protein_coding | 9 | 132371163 | 132398209 | METTL11A |
| ENSG00000148337 | 10.49567985 | 10.54705904 | protein_coding | 9 | 130928343 | 130966662 | CIZ1     |
| ENSG00000148339 | 8.415986232 | 7.992972811 | protein_coding | 9 | 130830480 | 130871524 | SLC25A25 |
| ENSG00000148341 | 10.30052049 | 10.6377072  | protein_coding | 9 | 131769315 | 131790582 | SH3GLB2  |
| ENSG00000148343 | 8.684416567 | 8.899098923 | protein_coding | 9 | 131798900 | 131834361 | FAM73B   |
| ENSG00000148344 | 8.006999229 | 6.149127429 | protein_coding | 9 | 132500610 | 132515326 | PTGES    |
| ENSG00000148346 | 10.5335842  | 9.424844729 | protein_coding | 9 | 130911350 | 130915734 | LCN2     |
| ENSG00000148356 | 9.27062517  | 9.22117442  | protein_coding | 9 | 130213765 | 130265780 | LRSAM1   |
| ENSG00000148357 | 1.616589159 | 1.667587519 | protein_coding | 9 | 133028269 | 133309510 | HMCN2    |

|                 |             |             |                |    |           |           |           |
|-----------------|-------------|-------------|----------------|----|-----------|-----------|-----------|
| ENSG00000148358 | 10.69263307 | 10.46023731 | protein_coding | 9  | 132815705 | 132902448 | GPR107    |
| ENSG00000148362 | 9.036344956 | 9.141593107 | protein_coding | 9  | 139886870 | 139888436 | C9orf142  |
| ENSG00000148377 | 1.16343121  | 0.697730409 | protein_coding | 10 | 1064847   | 1071799   | IDI2      |
| ENSG00000148384 | 7.821758815 | 7.850567963 | protein_coding | 9  | 139323071 | 139334274 | INPP5E    |
| ENSG00000148396 | 11.18812073 | 10.9243327  | protein_coding | 9  | 139334549 | 139372141 | SEC16A    |
| ENSG00000148399 | 8.576098123 | 8.791837833 | protein_coding | 9  | 140449356 | 140473387 | WDR85     |
| ENSG00000148400 | 10.38677526 | 9.85994185  | protein_coding | 9  | 139388896 | 139440314 | NOTCH1    |
| ENSG00000148408 | 5.827699195 | 5.908941696 | protein_coding | 9  | 140772241 | 141019076 | CACNA1B   |
| ENSG00000148411 | 9.817629308 | 9.550418273 | protein_coding | 9  | 138898383 | 138987131 | NACC2     |
| ENSG00000148426 | 9.541775001 | 8.253299769 | protein_coding | 10 | 11865338  | 11914276  | C10orf47  |
| ENSG00000148429 | 8.237837231 | 7.940975956 | protein_coding | 10 | 11502509  | 11653753  | USP6NL    |
| ENSG00000148444 | 6.798966424 | 7.439552137 | protein_coding | 10 | 22604903  | 22609235  | COMMD3    |
| ENSG00000148450 | 7.127924785 | 7.309836726 | protein_coding | 10 | 23384435  | 23410942  | MSRB2     |
| ENSG00000148459 | 6.727618145 | 7.91704449  | protein_coding | 10 | 26986588  | 27035727  | PDSS1     |
| ENSG00000148468 | 9.232475031 | 8.114504097 | protein_coding | 10 | 15253642  | 15413061  | FAM171A1  |
| ENSG00000148481 | 7.784382559 | 7.607691112 | protein_coding | 10 | 15820169  | 15902519  | FAM188A   |
| ENSG00000148483 | 1.16343121  | 0.950786998 | protein_coding | 10 | 17794251  | 17842867  | TMEM236   |
| ENSG00000148484 | 9.778108644 | 9.595769114 | protein_coding | 10 | 16632610  | 16859527  | RSU1      |
| ENSG00000148488 | 0           | 0.697730409 | protein_coding | 10 | 17360382  | 17496386  | ST8SIA6   |
| ENSG00000148498 | 9.664408419 | 10.51767533 | protein_coding | 10 | 34398488  | 35104253  | PARD3     |
| ENSG00000148516 | 8.233881494 | 9.282254961 | protein_coding | 10 | 31607424  | 31821599  | ZEB1      |
| ENSG00000148572 | 7.695130106 | 7.605389119 | protein_coding | 10 | 64893050  | 64914783  | NRBF2     |
| ENSG00000148606 | 9.404225042 | 9.546823838 | protein_coding | 10 | 79729008  | 79789303  | POLR3A    |
| ENSG00000148634 | 9.439002622 | 9.11432951  | protein_coding | 10 | 69681665  | 69835105  | HERC4     |
| ENSG00000148655 | 0           | 0.697730409 | protein_coding | 10 | 77191211  | 78318978  | C10orf11  |
| ENSG00000148660 | 8.671313239 | 8.38394126  | protein_coding | 10 | 75572259  | 75634343  | CAMK2G    |
| ENSG00000148671 | 1.960915222 | 1.667587519 | protein_coding | 10 | 88727949  | 88730672  | C10orf116 |
| ENSG00000148672 | 10.37155313 | 10.35865784 | protein_coding | 10 | 88810243  | 88854627  | GLUD1     |
| ENSG00000148677 | 10.36297617 | 11.26583293 | protein_coding | 10 | 92671853  | 92681033  | ANKRD1    |
| ENSG00000148680 | 5.795854912 | 3.679994897 | protein_coding | 10 | 92500580  | 92617455  | HTR7      |
| ENSG00000148688 | 7.568924112 | 7.070480904 | protein_coding | 10 | 92631473  | 92668312  | RPP30     |
| ENSG00000148690 | 7.921045056 | 8.315177126 | protein_coding | 10 | 95427640  | 95462329  | FRA10AC1  |
| ENSG00000148700 | 7.990682129 | 6.371325053 | protein_coding | 10 | 111756126 | 111895323 | ADD3      |
| ENSG00000148719 | 9.105088364 | 8.820898829 | protein_coding | 10 | 74092588  | 74114988  | DNAJB12   |
| ENSG00000148730 | 10.23770949 | 9.700312778 | protein_coding | 10 | 72164135  | 72188374  | EIF4EBP2  |
| ENSG00000148735 | 2.57521082  | 1.353254395 | protein_coding | 10 | 115511213 | 115543188 | C10orf81  |
| ENSG00000148737 | 8.47750173  | 8.163833676 | protein_coding | 10 | 114710009 | 114927437 | TCF7L2    |
| ENSG00000148773 | 12.22066345 | 12.21434498 | protein_coding | 10 | 129894923 | 129924649 | MKI67     |
| ENSG00000148795 | 0.869158192 | 1.353254395 | protein_coding | 10 | 104590288 | 104597290 | CYP17A1   |
| ENSG00000148798 | 2.57521082  | 5.638744877 | protein_coding | 10 | 105036920 | 105050108 | INA       |
| ENSG00000148803 | 6.414691513 | 6.79148052  | protein_coding | 10 | 135168658 | 135171529 | C10orf125 |
| ENSG00000148814 | 6.146643566 | 7.070480904 | protein_coding | 10 | 134145614 | 134195010 | LRRC27    |
| ENSG00000148824 | 5.389447744 | 6.149127429 | protein_coding | 10 | 135207598 | 135234811 |           |
| ENSG00000148832 | 5.538004898 | 6.044260771 | protein_coding | 10 | 135192695 | 135205198 | PAOX      |
| ENSG00000148834 | 9.358631958 | 10.16553509 | protein_coding | 10 | 105995114 | 106027217 | GSTO1     |
| ENSG00000148835 | 6.956090577 | 7.803146634 | protein_coding | 10 | 105127724 | 105148822 | TAF5      |
| ENSG00000148840 | 10.84238558 | 10.54555896 | protein_coding | 10 | 103892787 | 103910082 | PPRC1     |
| ENSG00000148841 | 9.328343713 | 9.158178572 | protein_coding | 10 | 106071894 | 106098162 | ITPRIP    |
| ENSG00000148842 | 7.04456449  | 7.359856617 | protein_coding | 10 | 104678071 | 104838344 | CNNM2     |
| ENSG00000148843 | 10.65651747 | 10.89211697 | protein_coding | 10 | 105156405 | 105206049 | PDCD11    |
| ENSG00000148848 | 3.502389126 | 4.202780776 | protein_coding | 10 | 127700950 | 128077024 | ADAM12    |
| ENSG00000148908 | 8.271030151 | 8.957119685 | protein_coding | 10 | 121259340 | 121302220 | RGS10     |
| ENSG00000148925 | 8.410739551 | 8.83962623  | protein_coding | 11 | 13409548  | 13484844  | BTBD10    |
| ENSG00000148926 | 8.072698871 | 10.06189795 | protein_coding | 11 | 10326227  | 10328944  | ADM       |
| ENSG00000148935 | 0.499066092 | 1.353254395 | protein_coding | 11 | 22647188  | 22834601  | GAS2      |
| ENSG00000148943 | 8.445362311 | 8.414504719 | protein_coding | 11 | 27516123  | 27528320  | LIN7C     |
| ENSG00000148948 | 0           | 2.912743273 | protein_coding | 11 | 40135753  | 41481323  | LRRC4C    |
| ENSG00000148950 | 5.869093502 | 6.030599799 | protein_coding | 11 | 31453948  | 31531192  | IMMP1L    |
| ENSG00000148965 | 3.077135474 | 3.183544561 | protein_coding | 11 | 18252896  | 18258440  | SAA4      |
| ENSG00000148985 | 8.48251156  | 8.371803145 | protein_coding | 11 | 3818954   | 3847601   | PGAP2     |
| ENSG00000149016 | 7.64536895  | 7.805153958 | protein_coding | 11 | 62342517  | 62359649  | TUT1      |
| ENSG00000149021 | 0           | 0.390640832 | protein_coding | 11 | 62172575  | 62190667  | SCGB1A1   |
| ENSG00000149043 | 4.77879189  | 2.971122874 | protein_coding | 11 | 1848709   | 1858751   | SYT8      |

|                 |             |             |                |    |           |           |          |
|-----------------|-------------|-------------|----------------|----|-----------|-----------|----------|
| ENSG00000149050 | 1.616589159 | 0.697730409 | protein_coding | 11 | 7020549   | 7041599   | ZNF214   |
| ENSG00000149084 | 9.999878142 | 10.06650758 | protein_coding | 11 | 43577986  | 43878167  | HSD17B12 |
| ENSG00000149089 | 7.1740722   | 7.635032283 | protein_coding | 11 | 34874641  | 34938046  | APIP     |
| ENSG00000149090 | 2.35979773  | 1.518964905 | protein_coding | 11 | 35453370  | 35551848  | PAMR1    |
| ENSG00000149091 | 9.807683852 | 9.577682064 | protein_coding | 11 | 46354455  | 46402104  | DGKZ     |
| ENSG00000149100 | 10.81285756 | 11.20251577 | protein_coding | 11 | 32605344  | 32627808  | EIF3M    |
| ENSG00000149115 | 11.73060292 | 11.56431502 | protein_coding | 11 | 57067112  | 57092426  | TNKS1BP1 |
| ENSG00000149131 | 2.928422289 | 4.363974406 | protein_coding | 11 | 57364860  | 57382326  | SERPING1 |
| ENSG00000149136 | 11.86007011 | 11.92638409 | protein_coding | 11 | 57093459  | 57103351  | SSRP1    |
| ENSG00000149150 | 7.395627075 | 7.022976646 | protein_coding | 11 | 57252007  | 57283259  | SLC43A1  |
| ENSG00000149177 | 9.241368875 | 9.225677649 | protein_coding | 11 | 48002110  | 48192393  | PTPRJ    |
| ENSG00000149179 | 8.497437504 | 8.387964709 | protein_coding | 11 | 46958240  | 47185936  | C11orf49 |
| ENSG00000149182 | 9.766517491 | 9.871482642 | protein_coding | 11 | 47185848  | 47198676  | ARFGAP2  |
| ENSG00000149187 | 10.93300807 | 10.60553028 | protein_coding | 11 | 47487496  | 47587121  | CELF1    |
| ENSG00000149196 | 8.35173048  | 8.806942451 | protein_coding | 11 | 86013253  | 86056969  | C11orf73 |
| ENSG00000149201 | 1.960915222 | 1.925536307 | protein_coding | 11 | 86085778  | 86134151  | CCDC81   |
| ENSG00000149212 | 1.799000381 | 1.802319292 | protein_coding | 11 | 94898704  | 94965705  | SESN3    |
| ENSG00000149218 | 8.879339004 | 8.696649474 | protein_coding | 11 | 94822974  | 94865809  | ENDOD1   |
| ENSG00000149231 | 7.31554162  | 7.873706627 | protein_coding | 11 | 96085933  | 96123087  | CCDC82   |
| ENSG00000149243 | 6.766474304 | 7.815148897 | protein_coding | 11 | 75133438  | 75141674  | KLHL35   |
| ENSG00000149256 | 0           | 0.697730409 | protein_coding | 11 | 78363876  | 79151992  | ODZ4     |
| ENSG00000149257 | 11.88314247 | 12.23198571 | protein_coding | 11 | 75273101  | 75283828  | SERPINH1 |
| ENSG00000149260 | 7.698004462 | 8.005247922 | protein_coding | 11 | 76777979  | 76837201  | CAPN5    |
| ENSG00000149262 | 8.179389493 | 8.124184315 | protein_coding | 11 | 77589766  | 77705724  | INTS4    |
| ENSG00000149269 | 9.855452651 | 9.618206363 | protein_coding | 11 | 77032752  | 77185680  | PAK1     |
| ENSG00000149273 | 13.25660174 | 13.69103991 | protein_coding | 11 | 75110530  | 75133324  | RPS3     |
| ENSG00000149289 | 8.462367008 | 8.838646614 | protein_coding | 11 | 109964087 | 110042566 | ZC3H12C  |
| ENSG00000149292 | 6.482942724 | 7.050313162 | protein_coding | 11 | 113185251 | 113254266 | TTC12    |
| ENSG00000149294 | 0           | 0.390640832 | protein_coding | 11 | 112831997 | 113149158 | NCAM1    |
| ENSG00000149300 | 0           | 0.390640832 | protein_coding | 11 | 111788756 | 111797596 | C11orf52 |
| ENSG00000149308 | 8.458982065 | 8.89250574  | protein_coding | 11 | 108027942 | 108093369 | NPAT     |
| ENSG00000149311 | 9.582007615 | 10.01149995 | protein_coding | 11 | 108093211 | 108239829 | ATM      |
| ENSG00000149313 | 8.753741308 | 9.014632836 | protein_coding | 11 | 105946228 | 105969437 | AASDHPPT |
| ENSG00000149328 | 8.594725428 | 8.710638407 | protein_coding | 11 | 134201768 | 134248235 | GLB1L2   |
| ENSG00000149346 | 5.672682881 | 5.22435463  | protein_coding | 20 | 10415951  | 10617477  | C20orf94 |
| ENSG00000149357 | 9.648151859 | 10.12834013 | protein_coding | 11 | 71796941  | 71814433  | LAMTOR1  |
| ENSG00000149380 | 4.75690578  | 5.372493443 | protein_coding | 11 | 73946846  | 74022702  | P4HA3    |
| ENSG00000149403 | 2.10647801  | 0.950786998 | protein_coding | 11 | 120382468 | 120859101 | GRIK4    |
| ENSG00000149418 | 7.903720218 | 2.721932731 | protein_coding | 11 | 130029457 | 130080356 | ST14     |
| ENSG00000149428 | 11.98417782 | 12.19332809 | protein_coding | 11 | 118914899 | 118927940 | HYOU1    |
| ENSG00000149435 | 0.499066092 | 0           | protein_coding | 20 | 23965690  | 23969416  | GGTLC1   |
| ENSG00000149451 | 0           | 0.390640832 | protein_coding | 20 | 3648612   | 3662893   | ADAM33   |
| ENSG00000149474 | 7.546773135 | 8.088368066 | protein_coding | 20 | 18118499  | 18169031  | CSRP2BP  |
| ENSG00000149476 | 8.369868254 | 8.066778281 | protein_coding | 11 | 61100682  | 61116714  | DAK      |
| ENSG00000149480 | 10.90373985 | 10.87477986 | protein_coding | 11 | 62360686  | 62369312  | MTA2     |
| ENSG00000149483 | 8.331511968 | 8.730842828 | protein_coding | 11 | 61129473  | 61136683  | TMEM138  |
| ENSG00000149485 | 10.9821777  | 10.05937738 | protein_coding | 11 | 61567098  | 61647626  | FADS1    |
| ENSG00000149488 | 1.407729925 | 2.334191469 | protein_coding | 20 | 2517253   | 2622430   | TMC2     |
| ENSG00000149489 | 4.352265886 | 5.187895122 | protein_coding | 11 | 62379194  | 62382592  | ROM1     |
| ENSG00000149499 | 9.445858656 | 9.481799375 | protein_coding | 11 | 62369690  | 62380237  | EML3     |
| ENSG00000149503 | 10.15226439 | 10.08107738 | protein_coding | 11 | 61891445  | 61920635  | INCENP   |
| ENSG00000149506 | 1.16343121  | 1.925536307 | protein_coding | 11 | 60635035  | 60643166  | ZP1      |
| ENSG00000149527 | 6.998676229 | 4.127774132 | protein_coding | 1  | 2398898   | 2436969   | PLCH2    |
| ENSG00000149531 | 7.007971391 | 7.378849871 | protein_coding | 20 | 29611857  | 29634010  | FRG1B    |
| ENSG00000149532 | 10.37245301 | 10.30398946 | protein_coding | 11 | 61170121  | 61197503  | CPSF7    |
| ENSG00000149541 | 8.586993258 | 8.690147008 | protein_coding | 11 | 62382768  | 62389647  | B3GAT3   |
| ENSG00000149547 | 11.11553735 | 11.15333184 | protein_coding | 11 | 125439112 | 125454575 | EI24     |
| ENSG00000149548 | 6.364918751 | 7.116470702 | protein_coding | 11 | 124824017 | 124911385 | CCDC15   |
| ENSG00000149554 | 8.735671237 | 8.907531839 | protein_coding | 11 | 125495036 | 125546150 | CHEK1    |
| ENSG00000149557 | 1.407729925 | 1.518964905 | protein_coding | 11 | 125315646 | 125366213 | FEZ1     |
| ENSG00000149564 | 3.554067925 | 3.679994897 | protein_coding | 11 | 124622026 | 124632186 | ESAM     |
| ENSG00000149571 | 2.57521082  | 2.851901313 | protein_coding | 11 | 126293254 | 126873355 | KIRREL3  |
| ENSG00000149573 | 6.74439909  | 5.80042639  | protein_coding | 11 | 118124118 | 118135251 | MPZL2    |

|                 |             |             |                  |    |           |           |          |
|-----------------|-------------|-------------|------------------|----|-----------|-----------|----------|
| ENSG00000149577 | 8.539709228 | 8.714915547 | protein_coding   | 11 | 117049449 | 117068160 | SIDT2    |
| ENSG00000149582 | 4.642199401 | 2.851901313 | protein_coding   | 11 | 118401756 | 118417995 | TMEM25   |
| ENSG00000149591 | 7.218789138 | 11.64526021 | protein_coding   | 11 | 117070037 | 117075503 | TAGLN    |
| ENSG00000149596 | 7.689364157 | 8.452140716 | protein_coding   | 20 | 42740335  | 42816218  | JPH2     |
| ENSG00000149599 | 0.869158192 | 1.16600992  | protein_coding   | 20 | 30435440  | 30458550  | DUSP15   |
| ENSG00000149600 | 7.933293789 | 8.455978641 | protein_coding   | 20 | 31290493  | 31331814  | COMMD7   |
| ENSG00000149609 | 0.869158192 | 0.950786998 | protein_coding   | 20 | 32250090  | 32251720  | C2orf144 |
| ENSG00000149633 | 4.437288965 | 4.622587519 | protein_coding   | 20 | 36838890  | 36889174  | KIAA1755 |
| ENSG00000149634 | 3.211941663 | 2.971122874 | protein_coding   | 20 | 44515128  | 44516274  | SPATA25  |
| ENSG00000149635 | 0.869158192 | 0.697730409 | protein_coding   | 20 | 45169585  | 45179213  | C2orf123 |
| ENSG00000149636 | 8.795939543 | 9.401816026 | protein_coding   | 20 | 35380194  | 35402230  | DSN1     |
| ENSG00000149639 | 10.922294   | 11.07355782 | protein_coding   | 20 | 35405845  | 35492089  | KIAA0889 |
| ENSG00000149646 | 1.407729925 | 2.652276565 | protein_coding   | 20 | 34556512  | 34618622  | C2orf152 |
| ENSG00000149651 | 0           | 1.16600992  | protein_coding   | 20 | 44350990  | 44354469  | SPINT4   |
| ENSG00000149657 | 9.195324263 | 9.13522434  | protein_coding   | 20 | 60697517  | 60710434  | LSM14B   |
| ENSG00000149658 | 10.02584819 | 9.69599206  | protein_coding   | 20 | 61826781  | 61847586  | YTHDF1   |
| ENSG00000149679 | 8.166995477 | 8.254769334 | protein_coding   | 20 | 60963686  | 60982341  | CABLES2  |
| ENSG00000149716 | 8.830404061 | 9.017232731 | protein_coding   | 11 | 69467844  | 69490184  | ORAOV1   |
| ENSG00000149735 | 1.16343121  | 1.802319292 | protein_coding   | 11 | 64701943  | 64703360  | GPHA2    |
| ENSG00000149743 | 7.524276744 | 7.928139131 | protein_coding   | 11 | 63991271  | 63993726  | TRPT1    |
| ENSG00000149761 | 7.765324926 | 7.743685008 | protein_coding   | 11 | 63993413  | 63998158  | NUDT22   |
| ENSG00000149781 | 4.75690578  | 5.317302248 | protein_coding   | 11 | 63974150  | 63991354  | FERMT3   |
| ENSG00000149782 | 10.29483576 | 9.961978945 | protein_coding   | 11 | 64018995  | 64036622  | PLCB3    |
| ENSG00000149792 | 9.453532949 | 9.401816026 | protein_coding   | 11 | 64889655  | 64894843  | MRPL49   |
| ENSG00000149798 | 9.297405929 | 9.280091692 | protein_coding   | 11 | 65082289  | 65089900  | CDC42EP2 |
| ENSG00000149806 | 10.48240375 | 11.16919932 | protein_coding   | 11 | 64888100  | 64889945  | FAU      |
| ENSG00000149809 | 5.223818625 | 5.545764946 | protein_coding   | 11 | 64879317  | 64883856  | TM7SF2   |
| ENSG00000149823 | 10.0016241  | 10.15770118 | protein_coding   | 11 | 64856796  | 64879332  | C11orf2  |
| ENSG00000149922 | 4.464551814 | 4.342020395 | protein_coding   | 16 | 30097114  | 30103208  | TBX6     |
| ENSG00000149923 | 10.67377603 | 10.67385839 | protein_coding   | 16 | 30087299  | 30096698  | PPP4C    |
| ENSG00000149925 | 14.59712286 | 14.51531629 | protein_coding   | 16 | 30064411  | 30081778  | ALDOA    |
| ENSG00000149926 | 4.322773689 | 4.448594745 | protein_coding   | 16 | 30035748  | 30064299  | FAM57B   |
| ENSG00000149927 | 4.75690578  | 4.622587519 | protein_coding   | 16 | 30016830  | 30034591  | DOC2A    |
| ENSG00000149929 | 7.058051099 | 7.340609974 | protein_coding   | 16 | 30003645  | 30007757  | HIRIP3   |
| ENSG00000149930 | 9.803686393 | 9.924613326 | protein_coding   | 16 | 29984962  | 30003582  | TAOK2    |
| ENSG00000149932 | 8.671313239 | 8.91219558  | protein_coding   | 16 | 29952206  | 29984373  | TMEM219  |
| ENSG00000149948 | 9.139327269 | 7.902117654 | protein_coding   | 12 | 66217911  | 66360075  | HMGA2    |
| ENSG00000149968 | 1.16343121  | 4.202780776 | protein_coding   | 11 | 102706532 | 102714534 | MMP3     |
| ENSG00000150051 | 3.146112541 | 3.32456471  | protein_coding   | 10 | 27961803  | 28034989  | MKX      |
| ENSG00000150054 | 5.40360309  | 4.406904905 | protein_coding   | 10 | 28339922  | 28591995  | MPP7     |
| ENSG00000150076 | 0.499066092 | 2.501982735 | protein_coding   | 10 | 32856651  | 33171802  | C1orf68  |
| ENSG00000150093 | 13.10851574 | 14.694746   | protein_coding   | 10 | 33189247  | 33294720  | ITGB1    |
| ENSG00000150165 | 2.671945279 | 1.667587519 | protein_coding   | 10 | 47157983  | 47174093  | ANXA8L1  |
| ENSG00000150201 | 0.499066092 | 0           | protein_coding   | 10 | 43867090  | 43871783  | FXYP4    |
| ENSG00000150275 | 0           | 0.390640832 | protein_coding   | 10 | 55562531  | 57387702  | PCDH15   |
| ENSG00000150281 | 5.806547963 | 6.712401119 | protein_coding   | 16 | 30907928  | 30914881  | CTF1     |
| ENSG00000150316 | 8.429884808 | 8.844514354 | processed_transc | 11 | 94695787  | 94706776  | CWC15    |
| ENSG00000150337 | 0           | 0.390640832 | protein_coding   | 1  | 149754227 | 149764074 | FCGR1A   |
| ENSG00000150347 | 8.935220147 | 8.337540265 | protein_coding   | 10 | 63661059  | 63856703  | ARID5B   |
| ENSG00000150401 | 6.716321419 | 6.677762549 | protein_coding   | 13 | 114110134 | 114145267 | DCUN1D2  |
| ENSG00000150403 | 9.419108071 | 9.233897238 | protein_coding   | 13 | 114145310 | 114204542 | TMCO3    |
| ENSG00000150433 | 7.521034145 | 7.756190105 | protein_coding   | 11 | 124966398 | 124981659 | TMEM218  |
| ENSG00000150455 | 5.672682881 | 5.629711952 | protein_coding   | 11 | 126152960 | 126168740 | TIRAP    |
| ENSG00000150456 | 5.752272083 | 6.002883551 | protein_coding   | 13 | 21296543  | 21348097  | N6AMT2   |
| ENSG00000150457 | 8.485841807 | 8.276635048 | protein_coding   | 13 | 21547171  | 21635718  | LATS2    |
| ENSG00000150459 | 9.354994343 | 9.44751161  | protein_coding   | 13 | 21714653  | 21723221  | SAP18    |
| ENSG00000150471 | 0           | 0.697730409 | protein_coding   | 4  | 62066976  | 62938184  | LPHN3    |
| ENSG00000150477 | 4.6658819   | 5.004391715 | protein_coding   | 18 | 34409069  | 34811481  | KIAA1328 |
| ENSG00000150510 | 0.869158192 | 0.390640832 | protein_coding   | 13 | 51796503  | 51857930  | FAM124A  |
| ENSG00000150527 | 4.322773689 | 4.7279204   | protein_coding   | 14 | 39734488  | 39856156  | CTAGE5   |
| ENSG00000150540 | 7.609180529 | 7.126137778 | protein_coding   | 2  | 138721590 | 138773930 | HNMT     |
| ENSG00000150551 | 0           | 1.353254395 | protein_coding   | 2  | 133402337 | 133429152 | LYPD1    |
| ENSG00000150556 | 1.616589159 | 0           | protein_coding   | 2  | 149894621 | 150071776 | LYPD6B   |

|                 |             |             |                |    |           |           |          |
|-----------------|-------------|-------------|----------------|----|-----------|-----------|----------|
| ENSG00000150593 | 8.899456749 | 9.225677649 | protein_coding | 10 | 112631565 | 112659764 | PDCD4    |
| ENSG00000150594 | 0           | 0.390640832 | protein_coding | 10 | 112836790 | 112840658 | ADRA2A   |
| ENSG00000150625 | 0.869158192 | 0.390640832 | protein_coding | 4  | 176554085 | 176923815 | GPM6A    |
| ENSG00000150628 | 0.499066092 | 0.950786998 | protein_coding | 4  | 177105789 | 177116822 | SPATA4   |
| ENSG00000150636 | 1.616589159 | 3.133298822 | protein_coding | 18 | 66401969  | 66722426  | CCDC102B |
| ENSG00000150637 | 1.407729925 | 1.802319292 | protein_coding | 18 | 67528097  | 67624160  | CD226    |
| ENSG00000150656 | 0           | 2.039052734 | protein_coding | 18 | 72201675  | 72252261  | CNDP1    |
| ENSG00000150667 | 2.57521082  | 2.501982735 | protein_coding | 15 | 39892232  | 40075031  | FSIP1    |
| ENSG00000150672 | 2.762599152 | 2.652276565 | protein_coding | 11 | 83166055  | 85338966  | DLG2     |
| ENSG00000150687 | 11.32270757 | 10.82766699 | protein_coding | 11 | 86502101  | 86663886  | PRSS23   |
| ENSG00000150712 | 9.847708073 | 9.314320673 | protein_coding | 5  | 32227100  | 32313115  | MTMR12   |
| ENSG00000150722 | 4.712111592 | 4.448594745 | protein_coding | 2  | 182818968 | 182996125 | PPP1R1C  |
| ENSG00000150753 | 12.89396063 | 12.50100421 | protein_coding | 5  | 10250033  | 10266524  | CCT5     |
| ENSG00000150756 | 6.887241849 | 6.819555981 | protein_coding | 5  | 10226442  | 10250009  | FAM173B  |
| ENSG00000150760 | 9.335744919 | 9.339469783 | protein_coding | 10 | 128593978 | 129250781 | DOCK1    |
| ENSG00000150764 | 6.681890601 | 6.27612435  | protein_coding | 11 | 111797868 | 111893308 | DIXDC1   |
| ENSG00000150768 | 9.752069226 | 9.586462181 | protein_coding | 11 | 111895538 | 111935114 | DLAT     |
| ENSG00000150773 | 4.381167248 | 4.744751758 | protein_coding | 11 | 111934734 | 111944998 | PIH1D2   |
| ENSG00000150776 | 8.782461599 | 9.144766978 | protein_coding | 11 | 111944810 | 111955874 | C11orf57 |
| ENSG00000150779 | 7.575190993 | 8.690147008 | protein_coding | 11 | 111955524 | 111957522 | TIMM8B   |
| ENSG00000150782 | 7.457998197 | 6.633261019 | protein_coding | 11 | 112013974 | 112034840 | IL18     |
| ENSG00000150787 | 7.273767634 | 7.672899552 | protein_coding | 11 | 112097088 | 112140678 | PTS      |
| ENSG00000150867 | 9.619633528 | 8.606292299 | protein_coding | 10 | 22823778  | 23003503  | PIP4K2A  |
| ENSG00000150873 | 1.407729925 | 0.950786998 | protein_coding | 2  | 11273179  | 11286916  | C2orf50  |
| ENSG00000150907 | 7.498129565 | 7.129345795 | protein_coding | 13 | 41129817  | 41240734  | FOXO1    |
| ENSG00000150938 | 10.93575031 | 11.2410239  | protein_coding | 2  | 36583069  | 36778278  | CRIM1    |
| ENSG00000150961 | 10.12154978 | 9.924613326 | protein_coding | 4  | 119643978 | 119759838 | SEC24D   |
| ENSG00000150967 | 7.517784241 | 6.803579823 | protein_coding | 12 | 123405498 | 123466196 | ABCB9    |
| ENSG00000150977 | 7.1740722   | 6.941369681 | protein_coding | 12 | 123899936 | 123921264 | RILPL2   |
| ENSG00000150990 | 9.483828293 | 9.457756176 | protein_coding | 12 | 125431371 | 125473668 | DHX37    |
| ENSG00000150991 | 12.09450121 | 11.78263365 | protein_coding | 12 | 125396150 | 125401914 | UBC      |
| ENSG00000150995 | 7.030950614 | 7.080460027 | protein_coding | 3  | 4535032   | 4889524   | ITPR1    |
| ENSG00000151006 | 6.298293508 | 6.779278886 | protein_coding | 16 | 31093907  | 31100949  | PRSS53   |
| ENSG00000151012 | 9.480493389 | 8.734007291 | protein_coding | 4  | 139085251 | 139163503 | SLC7A11  |
| ENSG00000151014 | 7.990682129 | 8.010476879 | protein_coding | 4  | 139936943 | 139966906 | CCRN4L   |
| ENSG00000151023 | 2.847891871 | 2.579085888 | protein_coding | 10 | 25270908  | 25305085  | ENKUR    |
| ENSG00000151025 | 1.616589159 | 0.390640832 | protein_coding | 10 | 25463991  | 25891155  | GPR158   |
| ENSG00000151062 | 1.407729925 | 1.518964905 | protein_coding | 12 | 1901123   | 2028002   | CACNA2D4 |
| ENSG00000151065 | 7.053569556 | 7.157901395 | protein_coding | 12 | 2055220   | 2113701   | DCP1B    |
| ENSG00000151067 | 0           | 0.390640832 | protein_coding | 12 | 2079952   | 2807115   | CACNA1C  |
| ENSG00000151090 | 6.442380648 | 5.767861411 | protein_coding | 3  | 24158651  | 24536773  | THR3     |
| ENSG00000151092 | 7.572060955 | 8.173189549 | protein_coding | 3  | 25760435  | 25831530  | NGLY1    |
| ENSG00000151093 | 6.664362065 | 6.877938671 | protein_coding | 3  | 25824408  | 25836025  | OXSM     |
| ENSG00000151116 | 7.737655476 | 7.635032283 | protein_coding | 11 | 18552748  | 18610294  | UEVLD    |
| ENSG00000151117 | 3.502389126 | 5.759604001 | protein_coding | 11 | 18714669  | 18726332  | TMEM86A  |
| ENSG00000151131 | 6.449220685 | 6.746227492 | protein_coding | 12 | 105380088 | 105443515 | C12orf45 |
| ENSG00000151135 | 9.100750797 | 9.084889332 | protein_coding | 12 | 107349497 | 107372556 | C12orf23 |
| ENSG00000151136 | 0.499066092 | 0           | protein_coding | 12 | 107712190 | 108053419 | BTBD11   |
| ENSG00000151148 | 9.085465781 | 8.768365845 | protein_coding | 12 | 109915207 | 109974507 | UBE3B    |
| ENSG00000151150 | 6.0776925   | 0.950786998 | protein_coding | 10 | 61788159  | 62493248  | ANK3     |
| ENSG00000151151 | 8.694526397 | 8.418443943 | protein_coding | 10 | 59951278  | 60027694  | IPMK     |
| ENSG00000151164 | 2.847891871 | 3.64455972  | protein_coding | 12 | 110939460 | 110969891 | RAD9B    |
| ENSG00000151176 | 9.459473748 | 9.018963395 | protein_coding | 12 | 113796371 | 113827203 | PLBD2    |
| ENSG00000151208 | 9.843171129 | 9.643669187 | protein_coding | 10 | 79550549  | 79686378  | DLG5     |
| ENSG00000151224 | 0.499066092 | 0           | protein_coding | 10 | 82031576  | 82049440  | MAT1A    |
| ENSG00000151229 | 6.634666104 | 6.592001111 | protein_coding | 12 | 40148823  | 40499891  | SLC2A13  |
| ENSG00000151233 | 8.041355121 | 8.375860541 | protein_coding | 12 | 42475647  | 42538681  | GXYLT1   |
| ENSG00000151239 | 10.06645173 | 10.02232546 | protein_coding | 12 | 44187526  | 44200178  | TWF1     |
| ENSG00000151240 | 7.140657543 | 7.51752531  | protein_coding | 10 | 320130    | 735683    | DIP2C    |
| ENSG00000151247 | 7.754320745 | 8.101495266 | protein_coding | 4  | 99792835  | 99851788  | EIF4E    |
| ENSG00000151276 | 6.965663283 | 7.192052139 | protein_coding | 3  | 65342053  | 66024509  | MAGI1    |
| ENSG00000151287 | 6.835971536 | 7.161039629 | protein_coding | 13 | 103418340 | 103426161 | C13orf27 |
| ENSG00000151292 | 8.940084182 | 8.831770617 | protein_coding | 5  | 122847793 | 122952739 | CSNK1G3  |

|                 |             |             |                  |    |           |           |           |
|-----------------|-------------|-------------|------------------|----|-----------|-----------|-----------|
| ENSG00000151303 | 4.292665995 | 3.906303962 | processed_transc | 10 | 88728247  | 88784489  | AGAP11    |
| ENSG00000151304 | 7.08025234  | 7.260948155 | protein_coding   | 5  | 121297656 | 121411265 | SRFBP1    |
| ENSG00000151320 | 5.672682881 | 5.6022688   | protein_coding   | 14 | 32798479  | 33300567  | AKAP6     |
| ENSG00000151322 | 0.869158192 | 1.353254395 | protein_coding   | 14 | 33404139  | 34273382  | NPAS3     |
| ENSG00000151327 | 8.632776617 | 8.765275934 | protein_coding   | 14 | 35514113  | 35582336  | FAM177A1  |
| ENSG00000151332 | 7.097770581 | 7.532142019 | protein_coding   | 14 | 36767770  | 36789882  | MBIP      |
| ENSG00000151338 | 6.892270075 | 7.135740508 | protein_coding   | 14 | 37667118  | 38021566  | MIPOL1    |
| ENSG00000151348 | 10.39653997 | 11.17697121 | protein_coding   | 11 | 44117099  | 44266979  | EXT2      |
| ENSG00000151353 | 7.521034145 | 7.655203404 | protein_coding   | 2  | 667335    | 677439    | TMEM18    |
| ENSG00000151360 | 0.869158192 | 0.950786998 | protein_coding   | 2  | 3705785   | 3750261   | ALLC      |
| ENSG00000151364 | 7.053569556 | 6.2290532   | protein_coding   | 11 | 77726761  | 77757237  | KCTD14    |
| ENSG00000151366 | 6.62865285  | 7.37615181  | protein_coding   | 11 | 77779350  | 77791265  | NDUFC2    |
| ENSG00000151376 | 7.562629889 | 7.670699368 | protein_coding   | 11 | 86152150  | 86383678  | ME3       |
| ENSG00000151388 | 1.16343121  | 0.390640832 | protein_coding   | 5  | 33523640  | 33892297  | ADAMTS12  |
| ENSG00000151413 | 7.102117104 | 6.984522608 | protein_coding   | 14 | 31959162  | 32330430  | NUBPL     |
| ENSG00000151414 | 8.12703021  | 8.900977169 | protein_coding   | 1  | 198126093 | 198291550 | NEK7      |
| ENSG00000151418 | 0           | 0.390640832 | protein_coding   | 1  | 198492352 | 198510075 | ATP6V1G3  |
| ENSG00000151422 | 8.05038018  | 7.973469823 | protein_coding   | 5  | 108083523 | 108532542 | FER       |
| ENSG00000151445 | 8.847332411 | 9.218917524 | protein_coding   | 14 | 77893018  | 77924295  | C14orf133 |
| ENSG00000151458 | 8.487504052 | 8.586588042 | protein_coding   | 4  | 125585207 | 125633887 | ANKRD50   |
| ENSG00000151461 | 9.040880241 | 8.749726325 | protein_coding   | 10 | 11962021  | 12085169  | UPF2      |
| ENSG00000151465 | 9.804353406 | 9.441071616 | protein_coding   | 10 | 12237964  | 12292588  | CDC123    |
| ENSG00000151466 | 7.140657543 | 7.195117037 | protein_coding   | 4  | 129786076 | 130014764 | SCLT1     |
| ENSG00000151468 | 9.456082002 | 7.743685008 | protein_coding   | 10 | 12938627  | 13141652  | CCDC3     |
| ENSG00000151470 | 5.660945913 | 5.792353798 | protein_coding   | 4  | 130014472 | 130034487 | C4orf33   |
| ENSG00000151474 | 8.269098624 | 7.394933125 | protein_coding   | 10 | 13685706  | 14504141  | FRMD4A    |
| ENSG00000151491 | 9.414746625 | 9.273582355 | protein_coding   | 12 | 15773092  | 16035263  | EPS8      |
| ENSG00000151498 | 8.422952257 | 8.720244202 | protein_coding   | 11 | 134123389 | 134135749 | ACAD8     |
| ENSG00000151500 | 7.599989788 | 8.094946597 | protein_coding   | 11 | 134118173 | 134123285 | THYN1     |
| ENSG00000151502 | 9.756212088 | 10.04925084 | protein_coding   | 11 | 134094539 | 134117686 | VPS26B    |
| ENSG00000151503 | 10.1124219  | 10.39908895 | protein_coding   | 11 | 134020014 | 134095348 | NCAPD3    |
| ENSG00000151532 | 8.154494062 | 8.437980325 | protein_coding   | 10 | 114206756 | 114578503 | VTI1A     |
| ENSG00000151552 | 7.908691438 | 8.171634445 | protein_coding   | 4  | 17461884  | 17513857  | QDPR      |
| ENSG00000151553 | 8.297803463 | 8.762179391 | protein_coding   | 10 | 116581503 | 116659591 | FAM160B1  |
| ENSG00000151575 | 4.230497448 | 4.710890357 | protein_coding   | 15 | 56536207  | 56738195  | TEX9      |
| ENSG00000151576 | 8.668385155 | 8.545152786 | protein_coding   | 3  | 113724680 | 113807269 | QTRTD1    |
| ENSG00000151611 | 4.593635215 | 5.085909553 | protein_coding   | 4  | 146539415 | 146581187 | MMAA      |
| ENSG00000151612 | 8.085926212 | 8.409235632 | protein_coding   | 4  | 146678779 | 146859787 | ZNF827    |
| ENSG00000151617 | 4.689181911 | 4.547834947 | protein_coding   | 4  | 148402069 | 148466106 | EDNRA     |
| ENSG00000151623 | 6.877132514 | 7.04352744  | protein_coding   | 4  | 148999913 | 149365850 | NR3C2     |
| ENSG00000151631 | 1.407729925 | 0.390640832 | pseudogene       | 10 | 4914093   | 4934167   |           |
| ENSG00000151632 | 1.799000381 | 1.16600992  | protein_coding   | 10 | 5029967   | 5060207   | AKR1C2    |
| ENSG00000151640 | 5.538004898 | 6.35497494  | protein_coding   | 10 | 134000404 | 134019266 | DPYSL4    |
| ENSG00000151650 | 0.869158192 | 0.390640832 | protein_coding   | 10 | 135051175 | 135055433 | VENTX     |
| ENSG00000151651 | 8.3352092   | 9.149514732 | protein_coding   | 10 | 135075907 | 135090372 | ADAM8     |
| ENSG00000151655 | 0.869158192 | 0.697730409 | protein_coding   | 10 | 7745232   | 7791483   | ITIH2     |
| ENSG00000151657 | 6.710639711 | 6.544728831 | protein_coding   | 10 | 7795188   | 7829990   | KIN       |
| ENSG00000151665 | 5.752272083 | 6.316088276 | protein_coding   | 2  | 46808076  | 46844258  | PIGF      |
| ENSG00000151687 | 4.062237333 | 3.411459265 | protein_coding   | 2  | 190539016 | 190625919 | ANKAR     |
| ENSG00000151689 | 5.141750194 | 4.640685763 | protein_coding   | 2  | 191208196 | 191236391 | INPP1     |
| ENSG00000151690 | 6.26766507  | 6.287656023 | protein_coding   | 2  | 191273081 | 191373931 | MFSD6     |
| ENSG00000151692 | 5.948480845 | 4.42790041  | protein_coding   | 2  | 7057523   | 7208417   | RNF144A   |
| ENSG00000151693 | 9.203438318 | 8.26792849  | protein_coding   | 2  | 9346894   | 9545812   | ASAP2     |
| ENSG00000151694 | 9.273518431 | 8.614328238 | protein_coding   | 2  | 9628615   | 9695921   | ADAM17    |
| ENSG00000151704 | 1.616589159 | 1.667587519 | protein_coding   | 11 | 128706210 | 128737268 | KCNJ1     |
| ENSG00000151715 | 6.196276899 | 5.767861411 | protein_coding   | 11 | 129685714 | 129729898 | TMEM45B   |
| ENSG00000151718 | 9.325558442 | 9.38782027  | protein_coding   | 4  | 184020446 | 184241930 | WWC2      |
| ENSG00000151725 | 7.870982917 | 8.846464976 | protein_coding   | 4  | 185615772 | 185655287 | MLF1IP    |
| ENSG00000151726 | 9.662202373 | 9.742822827 | protein_coding   | 4  | 185676749 | 185747972 | ACSL1     |
| ENSG00000151729 | 7.993024472 | 8.692317755 | protein_coding   | 4  | 186064395 | 186068434 | SLC25A4   |
| ENSG00000151743 | 5.752272083 | 5.988823159 | protein_coding   | 12 | 31824071  | 31882108  | AMN1      |
| ENSG00000151746 | 8.092494681 | 7.743685008 | protein_coding   | 12 | 32259769  | 32536567  | BICD1     |
| ENSG00000151748 | 9.008829705 | 8.637044457 | protein_coding   | 14 | 51098776  | 51135056  | SAV1      |



|                 |             |             |                 |    |           |           |          |
|-----------------|-------------|-------------|-----------------|----|-----------|-----------|----------|
| ENSG00000151773 | 4.593635215 | 4.7279204   | protein_coding  | 13 | 44398045  | 44453864  | CCDC122  |
| ENSG00000151778 | 0.499066092 | 0           | protein_coding  | 13 | 44947801  | 44971850  | SERP2    |
| ENSG00000151779 | 8.883132512 | 8.581912372 | protein_coding  | 2  | 15307032  | 15701454  | NBAS     |
| ENSG00000151789 | 0.499066092 | 1.353254395 | protein_coding  | 3  | 21459915  | 22414812  | ZNF385D  |
| ENSG00000151790 | 2.847891871 | 4.448594745 | protein_coding  | 4  | 156775890 | 156841558 | TDO2     |
| ENSG00000151806 | 8.717371959 | 8.973277306 | protein_coding  | 4  | 44680444  | 44702943  | GUF1     |
| ENSG00000151812 | 1.16343121  | 1.16600992  | protein_coding  | 14 | 58030640  | 58448912  | SLC35F4  |
| ENSG00000151835 | 10.07421587 | 10.18184912 | protein_coding  | 13 | 23902965  | 24007841  | SACS     |
| ENSG00000151838 | 3.077135474 | 2.579085888 | protein_coding  | 14 | 59971801  | 60043549  | C14orf38 |
| ENSG00000151846 | 3.077135474 | 2.579085888 | protein_coding  | 13 | 25670006  | 25673392  | PABPC3   |
| ENSG00000151849 | 8.177331204 | 8.202422444 | protein_coding  | 13 | 25457171  | 25497018  | CENPJ    |
| ENSG00000151876 | 7.423680977 | 6.854868327 | protein_coding  | 5  | 41925356  | 41941845  | FBXO4    |
| ENSG00000151881 | 8.054871625 | 8.196317182 | protein_coding  | 5  | 43444354  | 43483995  | C5orf28  |
| ENSG00000151882 | 7.556308086 | 7.161039629 | protein_coding  | 5  | 43376747  | 43412493  | CCL28    |
| ENSG00000151883 | 8.023133844 | 8.22508979  | protein_coding  | 5  | 49961733  | 50142356  | PARP8    |
| ENSG00000151892 | 0           | 0.390640832 | protein_coding  | 10 | 117816444 | 118033126 | GFRA1    |
| ENSG00000151893 | 9.804353406 | 9.775439595 | protein_coding  | 10 | 120433679 | 120514761 | C10orf46 |
| ENSG00000151914 | 10.90093603 | 10.75864974 | protein_coding  | 6  | 56322785  | 56819426  | DST      |
| ENSG00000151917 | 4.322773689 | 4.508954154 | protein_coding  | 6  | 56819773  | 56892140  | BEND6    |
| ENSG00000151923 | 9.809013881 | 10.16748693 | protein_coding  | 10 | 121334199 | 121356541 | TIAL1    |
| ENSG00000151929 | 10.08523551 | 10.053901   | protein_coding  | 10 | 121410882 | 121437331 | BAG3     |
| ENSG00000151963 | 0.499066092 | 0.390640832 | pseudogene      | 10 | 38172522  | 38173037  |          |
| ENSG00000151967 | 4.097495944 | 3.813624741 | protein_coding  | 3  | 159557650 | 159615149 | SCHIP1   |
| ENSG00000152022 | 9.694224448 | 9.826732496 | protein_coding  | 1  | 145477085 | 145501669 | LIX1L    |
| ENSG00000152034 | 0.499066092 | 0           | protein_coding  | 6  | 100367786 | 100442114 | MCHR2    |
| ENSG00000152049 | 1.407729925 | 0.950786998 | protein_coding  | 2  | 223916532 | 224063117 | KCNE4    |
| ENSG00000152056 | 7.026383958 | 5.57429348  | protein_coding  | 2  | 224616403 | 224702744 | AP1S3    |
| ENSG00000152061 | 6.956090577 | 7.093659051 | protein_coding  | 1  | 174128548 | 174964445 | RABGAP1L |
| ENSG00000152076 | 4.517578978 | 4.385599336 | protein_coding  | 2  | 130896860 | 130902707 | CCDC74B  |
| ENSG00000152078 | 6.554468172 | 6.716673044 | protein_coding  | 1  | 95582894  | 95663163  | TMEM56   |
| ENSG00000152082 | 8.205883411 | 8.228085371 | protein_coding  | 2  | 130939310 | 130948302 | MZT2B    |
| ENSG00000152086 | 0.869158192 | 0           | protein_coding  | 2  | 130949318 | 130956034 | TUBA3E   |
| ENSG00000152102 | 10.88494397 | 10.20103307 | protein_coding  | 2  | 131805449 | 131851033 | FAM168B  |
| ENSG00000152104 | 7.881135284 | 7.549009758 | protein_coding  | 1  | 214530851 | 214725792 | PTPN14   |
| ENSG00000152117 | 7.289098491 | 7.632773539 | pseudogene      | 2  | 132250386 | 132279145 |          |
| ENSG00000152127 | 9.850294221 | 9.947057728 | protein_coding  | 2  | 134877554 | 135212192 | MGAT5    |
| ENSG00000152128 | 1.799000381 | 0.697730409 | protein_coding  | 2  | 135213330 | 135476570 | TMEM163  |
| ENSG00000152133 | 7.202688343 | 7.213370937 | protein_coding  | 2  | 37311594  | 37326387  | CCDC75   |
| ENSG00000152137 | 8.426422697 | 8.998934298 | protein_coding  | 12 | 119616447 | 119658936 | HSPB8    |
| ENSG00000152147 | 6.922076877 | 7.558560655 | protein_coding  | 2  | 38978676  | 39009598  | GEMIN6   |
| ENSG00000152154 | 3.448790144 | 3.027231696 | protein_coding  | 2  | 39892122  | 39945103  | TMEM178  |
| ENSG00000152193 | 7.084651883 | 6.750400563 | protein_coding  | 13 | 79188426  | 79233314  | RNF219   |
| ENSG00000152217 | 0.499066092 | 0.390640832 | protein_coding  | 18 | 42260138  | 42648475  | SETBP1   |
| ENSG00000152219 | 7.430610036 | 7.774746834 | protein_coding  | 11 | 30344598  | 30359774  | C11orf46 |
| ENSG00000152223 | 9.678302254 | 9.864280473 | protein_coding  | 18 | 43427574  | 43547240  | EPG5     |
| ENSG00000152229 | 7.084651883 | 6.023720496 | protein_coding  | 18 | 43563502  | 43652238  | PSTPIP2  |
| ENSG00000152234 | 11.79812843 | 11.72548571 | protein_coding  | 18 | 43664110  | 43684300  | ATP5A1   |
| ENSG00000152240 | 7.165790811 | 7.724721747 | protein_coding  | 18 | 43684298  | 43708299  | HAUS1    |
| ENSG00000152242 | 8.245716314 | 8.135396417 | protein_coding  | 18 | 43753988  | 43846954  | C18orf25 |
| ENSG00000152253 | 6.922076877 | 7.219404604 | protein_coding  | 2  | 169690642 | 169769881 | SPC25    |
| ENSG00000152256 | 7.95748362  | 8.162268448 | protein_coding  | 2  | 173420101 | 173489823 | PDK1     |
| ENSG00000152268 | 4.026095388 | 4.710890357 | polymorphic_pse | 11 | 13983914  | 14289646  | SPON1    |
| ENSG00000152284 | 7.556308086 | 7.198175438 | protein_coding  | 2  | 85360533  | 85537511  | TCF7L1   |
| ENSG00000152291 | 11.52563376 | 11.51917171 | protein_coding  | 2  | 85545147  | 85555548  | TGOLN2   |
| ENSG00000152292 | 2.238690726 | 2.039052734 | protein_coding  | 2  | 85645844  | 85664152  | SH2D6    |
| ENSG00000152332 | 10.49856778 | 10.77102634 | protein_coding  | 1  | 162467041 | 162499419 | UHMK1    |
| ENSG00000152348 | 5.986594255 | 6.167968749 | protein_coding  | 5  | 81267844  | 81572241  | ATG10    |
| ENSG00000152359 | 7.058051099 | 7.240325909 | protein_coding  | 5  | 74969949  | 75013313  | POC5     |
| ENSG00000152377 | 8.685865174 | 9.727557272 | protein_coding  | 5  | 136310987 | 136934068 | SPOCK1   |
| ENSG00000152380 | 4.568725997 | 4.528525526 | protein_coding  | 5  | 79783788  | 79838382  | FAM151B  |
| ENSG00000152382 | 7.194570056 | 7.512619979 | protein_coding  | 1  | 166825747 | 166845564 | TADA1    |
| ENSG00000152402 | 0           | 0.697730409 | protein_coding  | 11 | 106555148 | 106889250 | GUCY1A2  |
| ENSG00000152404 | 7.54038131  | 7.752033772 | protein_coding  | 11 | 107197071 | 107328572 | CWF19L2  |

|                 |             |             |                  |    |           |           |          |
|-----------------|-------------|-------------|------------------|----|-----------|-----------|----------|
| ENSG00000152409 | 8.14188337  | 8.644911378 | protein_coding   | 5  | 78531925  | 78623038  | JMY      |
| ENSG00000152413 | 7.639400234 | 7.219404604 | protein_coding   | 5  | 78668459  | 78810040  | HOMER1   |
| ENSG00000152422 | 6.856698814 | 6.539915281 | protein_coding   | 5  | 82373317  | 82652548  | XRCC4    |
| ENSG00000152433 | 4.923348194 | 5.767861411 | protein_coding   | 19 | 57874891  | 57890243  | ZNF547   |
| ENSG00000152439 | 6.350376764 | 6.392840898 | protein_coding   | 19 | 58011309  | 58024436  | ZNF773   |
| ENSG00000152443 | 7.590740122 | 7.57982176  | protein_coding   | 19 | 58258164  | 58269527  | ZNF776   |
| ENSG00000152454 | 7.165790811 | 7.485338407 | protein_coding   | 19 | 58452206  | 58459077  | ZNF256   |
| ENSG00000152455 | 8.045874708 | 7.776794036 | protein_coding   | 10 | 14920819  | 14946314  | SUV39H2  |
| ENSG00000152457 | 7.773523328 | 7.362585296 | protein_coding   | 10 | 14939358  | 14996431  | DCLRE1C  |
| ENSG00000152463 | 2.471521042 | 2.334191469 | protein_coding   | 10 | 15074226  | 15115851  | OLAH     |
| ENSG00000152464 | 6.814942123 | 6.729413443 | protein_coding   | 10 | 15139179  | 15148129  | RPP38    |
| ENSG00000152465 | 9.367686069 | 8.597053222 | protein_coding   | 10 | 15144583  | 15210692  | NMT2     |
| ENSG00000152467 | 3.989024711 | 4.101879561 | protein_coding   | 19 | 58545400  | 58565999  | ZSCAN1   |
| ENSG00000152475 | 6.103936836 | 6.559073862 | protein_coding   | 19 | 58878993  | 58892389  | ZNF837   |
| ENSG00000152484 | 8.263288478 | 7.760334499 | protein_coding   | 13 | 27640293  | 27746033  | USP12    |
| ENSG00000152487 | 0.869158192 | 1.16600992  | processed_transc | 10 | 18940195  | 18948196  |          |
| ENSG00000152492 | 8.984315711 | 9.551016476 | protein_coding   | 3  | 191046866 | 191116459 | CCDC50   |
| ENSG00000152495 | 0.499066092 | 1.667587519 | protein_coding   | 5  | 110559351 | 110830584 | CAMK4    |
| ENSG00000152503 | 6.535310252 | 6.450406542 | protein_coding   | 5  | 114460459 | 114516243 | TRIM36   |
| ENSG00000152518 | 9.492131981 | 9.082408649 | protein_coding   | 2  | 43449541  | 43453748  | ZFP36L2  |
| ENSG00000152520 | 8.400188597 | 7.69255166  | protein_coding   | 13 | 28712643  | 28869475  | PAN3     |
| ENSG00000152527 | 5.346128795 | 4.048652948 | protein_coding   | 2  | 43864412  | 43995126  | PLEKHH2  |
| ENSG00000152556 | 10.2752422  | 10.07026818 | protein_coding   | 12 | 48498922  | 48540187  | PFKM     |
| ENSG00000152558 | 11.93019652 | 12.4517215  | protein_coding   | 11 | 102267063 | 102341115 | TMEM123  |
| ENSG00000152578 | 0.499066092 | 0.390640832 | protein_coding   | 11 | 105480721 | 105852819 | GRIA4    |
| ENSG00000152580 | 1.799000381 | 0.697730409 | protein_coding   | 3  | 151143172 | 151176497 | IGSF10   |
| ENSG00000152582 | 5.763291843 | 6.198834244 | protein_coding   | 5  | 35617946  | 35814713  | SPEF2    |
| ENSG00000152583 | 1.616589159 | 2.039052734 | protein_coding   | 4  | 88394487  | 88452213  | SPARCL1  |
| ENSG00000152601 | 10.49609276 | 10.21619866 | protein_coding   | 3  | 151961617 | 152183569 | MBNL1    |
| ENSG00000152611 | 2.10647801  | 1.16600992  | protein_coding   | 5  | 35904397  | 35938881  | CAPSL    |
| ENSG00000152620 | 9.726959073 | 9.615349218 | protein_coding   | 5  | 36192694  | 36242381  | NADKD1   |
| ENSG00000152642 | 7.292905885 | 7.090370599 | protein_coding   | 3  | 32147181  | 32210205  | GPD1L    |
| ENSG00000152661 | 9.036344956 | 9.281534232 | protein_coding   | 6  | 121756791 | 121770873 | GJA1     |
| ENSG00000152669 | 4.883502971 | 3.183544561 | protein_coding   | 5  | 54526980  | 54529508  | CCNO     |
| ENSG00000152670 | 0           | 0.697730409 | protein_coding   | 5  | 55033845  | 55112985  | DDX4     |
| ENSG00000152672 | 0.499066092 | 0.390640832 | protein_coding   | 2  | 71035775  | 71047732  | CLEC4F   |
| ENSG00000152683 | 8.314756163 | 8.65940853  | protein_coding   | 2  | 32390933  | 32449448  | SLC30A6  |
| ENSG00000152684 | 8.860220382 | 8.853271458 | protein_coding   | 5  | 52083774  | 52099880  | PELO     |
| ENSG00000152689 | 3.989024711 | 4.888000647 | protein_coding   | 2  | 33661391  | 33789817  | RASGRP3  |
| ENSG00000152700 | 8.579219424 | 8.52337065  | protein_coding   | 5  | 133934233 | 133984961 | SAR1B    |
| ENSG00000152705 | 2.238690726 | 3.027231696 | protein_coding   | 5  | 134303596 | 134347392 | CATSPER3 |
| ENSG00000152749 | 7.855619141 | 7.795089291 | protein_coding   | 13 | 95254157  | 95286899  | GPR180   |
| ENSG00000152763 | 2.471521042 | 3.279072565 | protein_coding   | 1  | 67278568  | 67390570  | WDR78    |
| ENSG00000152766 | 5.286269488 | 0           | protein_coding   | 10 | 90581889  | 90611575  | ANKRD22  |
| ENSG00000152767 | 0           | 0.390640832 | protein_coding   | 13 | 98795434  | 99102023  | FARP1    |
| ENSG00000152778 | 8.092494681 | 8.790825214 | protein_coding   | 10 | 91174343  | 91180758  | IFIT5    |
| ENSG00000152782 | 6.196276899 | 6.077857763 | protein_coding   | 10 | 91342745  | 91405215  | PANK1    |
| ENSG00000152784 | 6.068837212 | 6.023720496 | protein_coding   | 4  | 81105033  | 81125483  | PRDM8    |
| ENSG00000152785 | 0.869158192 | 0           | protein_coding   | 4  | 81952119  | 81978685  | BMP3     |
| ENSG00000152795 | 11.09932233 | 11.14642116 | protein_coding   | 4  | 83343717  | 83351294  | HNRPDL   |
| ENSG00000152804 | 5.054730169 | 5.995870484 | protein_coding   | 10 | 94447945  | 94455403  | HHEX     |
| ENSG00000152818 | 9.615078651 | 9.496780665 | protein_coding   | 6  | 144606837 | 145174170 | UTRN     |
| ENSG00000152822 | 1.16343121  | 1.16600992  | protein_coding   | 6  | 146348782 | 146758734 | GRM1     |
| ENSG00000152894 | 10.11994317 | 10.04203463 | protein_coding   | 6  | 128289924 | 128841870 | PTPRK    |
| ENSG00000152904 | 8.685865174 | 8.700968226 | protein_coding   | 1  | 235490665 | 235507847 | GGPS1    |
| ENSG00000152926 | 6.616550626 | 6.299096252 | protein_coding   | 7  | 64437285  | 64467062  | ZNF117   |
| ENSG00000152931 | 0.499066092 | 0.697730409 | lincRNA          | 5  | 59783540  | 59843484  | PART1    |
| ENSG00000152936 | 0.869158192 | 1.353254395 | protein_coding   | 12 | 25562241  | 25801513  | IFLTD1   |
| ENSG00000152939 | 7.186405829 | 6.235021771 | protein_coding   | 5  | 68710939  | 68740157  | MARVELD2 |
| ENSG00000152942 | 7.686472517 | 7.799123587 | protein_coding   | 5  | 68665120  | 68710628  | RAD17    |
| ENSG00000152944 | 7.837485466 | 7.37615181  | protein_coding   | 12 | 27175479  | 27219276  | MED21    |
| ENSG00000152952 | 11.34625883 | 12.05993995 | protein_coding   | 3  | 145787227 | 145881440 | PLOD2    |
| ENSG00000152969 | 4.464551814 | 5.259915406 | protein_coding   | 4  | 6027926   | 6202318   | JAKMIP1  |

|                 |             |             |                  |    |           |           |           |
|-----------------|-------------|-------------|------------------|----|-----------|-----------|-----------|
| ENSG00000152990 | 9.198372384 | 9.375714884 | protein_coding   | 4  | 22346694  | 22517677  | GPR125    |
| ENSG00000153006 | 6.9512803   | 6.771086752 | protein_coding   | 5  | 64016338  | 64064512  | SREK1IP1  |
| ENSG00000153015 | 7.842689815 | 7.67728988  | protein_coding   | 5  | 64064757  | 64314418  | CWC27     |
| ENSG00000153029 | 7.474855471 | 6.646756201 | protein_coding   | 1  | 181003067 | 181003074 | MR1       |
| ENSG00000153037 | 6.676071387 | 6.633261019 | protein_coding   | 5  | 112196885 | 112228776 | SRP19     |
| ENSG00000153044 | 7.734859118 | 7.644032061 | protein_coding   | 5  | 68485375  | 68506184  | CENPH     |
| ENSG00000153046 | 8.867898261 | 8.865827498 | protein_coding   | 6  | 4706345   | 4955785   | CDYL      |
| ENSG00000153048 | 9.464546462 | 10.04585947 | protein_coding   | 16 | 8946799   | 8962866   | CARHSP1   |
| ENSG00000153060 | 1.407729925 | 0.950786998 | protein_coding   | 16 | 10721358  | 10788802  | TEKT5     |
| ENSG00000153064 | 1.960915222 | 2.788380093 | protein_coding   | 4  | 102332443 | 102995969 | BANK1     |
| ENSG00000153066 | 9.144604451 | 8.922403049 | protein_coding   | 16 | 11772943  | 11836704  | TXNDC11   |
| ENSG00000153071 | 0.499066092 | 0.697730409 | protein_coding   | 5  | 39371780  | 39462402  | DAB2      |
| ENSG00000153086 | 0.869158192 | 1.16600992  | protein_coding   | 2  | 135596117 | 135659604 | ACMSD     |
| ENSG00000153093 | 3.830412367 | 0           | protein_coding   | 2  | 111490150 | 111875799 | ACOXL     |
| ENSG00000153094 | 7.67484765  | 7.249200135 | protein_coding   | 2  | 111876955 | 111924587 | BCL2L11   |
| ENSG00000153107 | 8.901951857 | 8.471229048 | protein_coding   | 2  | 112523848 | 112642267 | ANAPC1    |
| ENSG00000153113 | 10.77456633 | 10.55304383 | protein_coding   | 5  | 95865525  | 96115299  | CAST      |
| ENSG00000153130 | 8.203862602 | 8.734007291 | protein_coding   | 4  | 141178440 | 141303710 | SCOC      |
| ENSG00000153132 | 0.869158192 | 2.039052734 | protein_coding   | 4  | 141309609 | 141349122 | CLGN      |
| ENSG00000153140 | 6.579622637 | 6.766973175 | protein_coding   | 5  | 89688078  | 89705603  | CETN3     |
| ENSG00000153147 | 10.40095672 | 10.26149292 | protein_coding   | 4  | 144434616 | 144478639 | SMARCA5   |
| ENSG00000153157 | 0           | 1.353254395 | protein_coding   | 6  | 10748027  | 10979553  | SYCP2L    |
| ENSG00000153165 | 0.499066092 | 0.697730409 | protein_coding   | 2  | 107007564 | 107084832 | RGPD3     |
| ENSG00000153179 | 9.332049062 | 9.580028658 | protein_coding   | 12 | 65004293  | 65091347  | RASSF3    |
| ENSG00000153187 | 12.63715499 | 12.47712421 | protein_coding   | 1  | 245014468 | 245027844 | HNRNPU    |
| ENSG00000153201 | 10.3061829  | 10.09959632 | protein_coding   | 2  | 109335937 | 109402267 | RANBP2    |
| ENSG00000153207 | 9.492131981 | 9.540813141 | protein_coding   | 1  | 247002400 | 247095280 | AHCTF1    |
| ENSG00000153208 | 5.375152132 | 2.039052734 | protein_coding   | 2  | 112656056 | 112787138 | MERTK     |
| ENSG00000153214 | 8.479173607 | 7.825075067 | protein_coding   | 2  | 112812800 | 112876895 | TMEM87B   |
| ENSG00000153233 | 4.75690578  | 5.41517489  | protein_coding   | 12 | 71031853  | 71314623  | PTPRR     |
| ENSG00000153234 | 8.394884042 | 4.406904905 | protein_coding   | 2  | 157180944 | 157198860 | NR4A2     |
| ENSG00000153237 | 1.799000381 | 2.334191469 | protein_coding   | 2  | 159027593 | 159313265 | CCDC148   |
| ENSG00000153246 | 3.744048221 | 3.748356452 | protein_coding   | 2  | 160788519 | 160919121 | PLA2R1    |
| ENSG00000153250 | 9.438143322 | 8.948064416 | protein_coding   | 2  | 161128662 | 161350305 | RBMS1     |
| ENSG00000153291 | 6.421663777 | 6.815578497 | protein_coding   | 6  | 46620678  | 46649356  | SLC25A27  |
| ENSG00000153292 | 4.689181911 | 1.353254395 | protein_coding   | 6  | 46963107  | 47010099  | GPR110    |
| ENSG00000153294 | 4.999881834 | 3.532712221 | protein_coding   | 6  | 47653600  | 47689757  | GPR115    |
| ENSG00000153303 | 0.499066092 | 1.518964905 | protein_coding   | 6  | 168456425 | 168482237 | FRMD1     |
| ENSG00000153310 | 8.691645096 | 8.234057939 | protein_coding   | 8  | 130853716 | 131029375 | FAM49B    |
| ENSG00000153317 | 9.360447332 | 8.813937516 | protein_coding   | 8  | 131064353 | 131455906 | ASAP1     |
| ENSG00000153339 | 8.613115289 | 8.458531597 | protein_coding   | 18 | 29409136  | 29523063  | TRAPPC8   |
| ENSG00000153347 | 0           | 0.697730409 | protein_coding   | 5  | 94727048  | 94786158  | FAM81B    |
| ENSG00000153363 | 5.806547963 | 5.620622115 | processed_transc | 1  | 211556145 | 211605878 | LINC00467 |
| ENSG00000153391 | 7.07583934  | 6.610484676 | protein_coding   | 18 | 33034786  | 33077955  | INO80C    |
| ENSG00000153395 | 11.40240698 | 11.37323979 | protein_coding   | 5  | 1456595   | 1524092   | LPCAT1    |
| ENSG00000153404 | 3.448790144 | 1.925536307 | protein_coding   | 5  | 140373    | 190085    | PLEKHG4B  |
| ENSG00000153406 | 9.054401174 | 9.391832931 | protein_coding   | 16 | 4511695   | 4524896   | NMRAL1    |
| ENSG00000153443 | 9.273518431 | 9.53356709  | protein_coding   | 16 | 4656111   | 4665028   | FAM100A   |
| ENSG00000153446 | 0           | 1.925536307 | protein_coding   | 16 | 5094123   | 5116111   | C16orf89  |
| ENSG00000153485 | 6.393570237 | 6.382123086 | protein_coding   | 14 | 93651296  | 93653434  | C14orf109 |
| ENSG00000153487 | 7.097770581 | 7.216390925 | protein_coding   | 13 | 111365083 | 111373421 | ING1      |
| ENSG00000153495 | 1.616589159 | 1.667587519 | protein_coding   | 13 | 111968531 | 111996596 | C13orf16  |
| ENSG00000153531 | 5.417620896 | 5.248158938 | protein_coding   | 13 | 114076260 | 114107839 | ADPRHL1   |
| ENSG00000153551 | 8.690202285 | 8.401295742 | protein_coding   | 3  | 32433163  | 32524559  | CMTM7     |
| ENSG00000153558 | 5.498982484 | 5.767861411 | protein_coding   | 3  | 33318517  | 33445154  | FBXL2     |
| ENSG00000153560 | 10.11994317 | 10.13034291 | protein_coding   | 3  | 33429828  | 33482863  | UBP1      |
| ENSG00000153561 | 9.811006628 | 9.498022112 | protein_coding   | 2  | 86947296  | 87005164  | RMND5A    |
| ENSG00000153563 | 1.16343121  | 0           | protein_coding   | 2  | 87011729  | 87035519  | CD8A      |
| ENSG00000153574 | 8.398422578 | 8.046558348 | protein_coding   | 2  | 88991162  | 89050445  | RPIA      |
| ENSG00000153575 | 8.092494681 | 8.026050991 | protein_coding   | 15 | 22833395  | 22873892  | TUBGCP5   |
| ENSG00000153666 | 5.795854912 | 6.530239731 | protein_coding   | 15 | 23255242  | 23268823  | GOLGA8IP  |
| ENSG00000153707 | 0.869158192 | 0.697730409 | protein_coding   | 9  | 8314246   | 10612723  | PTPRD     |
| ENSG00000153714 | 6.35766608  | 6.831423059 | protein_coding   | 9  | 12775020  | 12822130  | C9orf150  |

|                 |             |             |                |    |           |           |           |
|-----------------|-------------|-------------|----------------|----|-----------|-----------|-----------|
| ENSG00000153721 | 7.692250012 | 7.612284109 | protein_coding | 6  | 154726311 | 154831793 | CNKSR3    |
| ENSG00000153767 | 7.988335976 | 7.668495823 | protein_coding | 3  | 120461484 | 120501916 | GTF2E1    |
| ENSG00000153774 | 8.698837588 | 8.684705808 | protein_coding | 16 | 75327596  | 75467383  | CFDP1     |
| ENSG00000153786 | 10.14227455 | 9.995767095 | protein_coding | 16 | 85007787  | 85045141  | ZDHHC7    |
| ENSG00000153789 | 0.499066092 | 0.697730409 | protein_coding | 16 | 85131965  | 85146114  | FAM92B    |
| ENSG00000153790 | 6.129712275 | 5.42565083  | protein_coding | 7  | 25174316  | 25219975  | C7orf31   |
| ENSG00000153802 | 0           | 0.697730409 | protein_coding | 4  | 68686594  | 68749750  | TMPRSS11D |
| ENSG00000153814 | 6.343050432 | 5.901455548 | protein_coding | 7  | 27870192  | 28220362  | JAZF1     |
| ENSG00000153815 | 10.74255805 | 10.06483306 | protein_coding | 16 | 81478775  | 81745173  | CMIP      |
| ENSG00000153823 | 6.462804234 | 6.896886088 | protein_coding | 2  | 229715242 | 230136001 | PID1      |
| ENSG00000153827 | 11.13104053 | 10.91390641 | protein_coding | 2  | 230631930 | 230787955 | TRIP12    |
| ENSG00000153832 | 5.948480845 | 5.125003832 | protein_coding | 2  | 230787018 | 230877825 | FBXO36    |
| ENSG00000153879 | 8.749591335 | 9.132029383 | protein_coding | 19 | 33864609  | 33873591  | CEBPG     |
| ENSG00000153885 | 7.337827682 | 7.915187059 | protein_coding | 19 | 34287751  | 34306668  | KCTD15    |
| ENSG00000153896 | 5.072559152 | 4.917990497 | protein_coding | 19 | 35248979  | 35270385  | ZNF599    |
| ENSG00000153898 | 4.491309013 | 3.081239798 | protein_coding | 1  | 85391268  | 85462796  | MCOLN2    |
| ENSG00000153902 | 3.950976309 | 3.453019579 | protein_coding | 19 | 35615417  | 35633355  | LGI4      |
| ENSG00000153904 | 8.732871027 | 8.168519197 | protein_coding | 1  | 85784168  | 86044046  | DDAH1     |
| ENSG00000153914 | 9.633963159 | 9.795772355 | protein_coding | 5  | 65435799  | 65479443  | SREK1     |
| ENSG00000153922 | 9.319038489 | 9.231660172 | protein_coding | 5  | 98190908  | 98262240  | CHD1      |
| ENSG00000153930 | 1.616589159 | 0.950786998 | protein_coding | 17 | 54230836  | 54589020  | ANKFN1    |
| ENSG00000153933 | 7.254372086 | 7.240325909 | protein_coding | 17 | 54911460  | 54946034  | DGKE      |
| ENSG00000153936 | 9.348606364 | 9.150304507 | protein_coding | 1  | 87380331  | 87634887  | HS2ST1    |
| ENSG00000153944 | 8.227927477 | 7.490337219 | protein_coding | 17 | 55333212  | 55757658  | MSI2      |
| ENSG00000153975 | 6.664362065 | 6.923001245 | protein_coding | 6  | 116956781 | 116989957 | ZUFSP     |
| ENSG00000153976 | 1.799000381 | 1.353254395 | protein_coding | 17 | 13399006  | 13505244  | HS3ST3A1  |
| ENSG00000153982 | 5.525114348 | 5.361622823 | protein_coding | 17 | 57297828  | 57353322  | GDPD1     |
| ENSG00000153989 | 8.965354743 | 8.823871996 | protein_coding | 6  | 117996665 | 118031803 | NUS1      |
| ENSG00000153993 | 0           | 1.16600992  | protein_coding | 7  | 84624869  | 84816171  | SEMA3D    |
| ENSG00000154001 | 10.41150208 | 10.35386622 | protein_coding | 14 | 63838075  | 64010092  | PPP2R5E   |
| ENSG00000154016 | 2.762599152 | 1.802319292 | protein_coding | 17 | 18923997  | 18950439  | GRAP      |
| ENSG00000154025 | 1.407729925 | 2.579085888 | protein_coding | 17 | 18853989  | 18924004  | SLC5A10   |
| ENSG00000154035 | 6.456028446 | 8.176294739 | protein_coding | 17 | 21142183  | 21156722  | C17orf103 |
| ENSG00000154040 | 5.40360309  | 4.566889334 | protein_coding | 18 | 21718942  | 21741564  | CABYR     |
| ENSG00000154059 | 8.421213901 | 7.8660349   | protein_coding | 18 | 22006580  | 22033499  | IMPACT    |
| ENSG00000154065 | 5.575999561 | 4.566889334 | protein_coding | 18 | 21178890  | 21242849  | ANKRD29   |
| ENSG00000154079 | 5.948480845 | 5.96747225  | protein_coding | 6  | 71276620  | 71299272  | C6orf57   |
| ENSG00000154096 | 1.616589159 | 1.667587519 | protein_coding | 11 | 119288090 | 119295695 | THY1      |
| ENSG00000154099 | 3.871730003 | 3.279072565 | protein_coding | 16 | 84178865  | 84212373  | DNAAF1    |
| ENSG00000154102 | 7.326727684 | 5.709041716 | protein_coding | 16 | 85741123  | 85784689  | C16orf74  |
| ENSG00000154114 | 7.797842652 | 8.44700755  | protein_coding | 11 | 120894781 | 120961484 | TBCEL     |
| ENSG00000154118 | 3.211941663 | 3.368666104 | protein_coding | 16 | 87635441  | 87731762  | JPH3      |
| ENSG00000154122 | 9.68845487  | 8.887777807 | protein_coding | 5  | 14704910  | 14871887  | ANKH      |
| ENSG00000154124 | 9.237422823 | 8.717049372 | protein_coding | 5  | 14664773  | 14699820  | FAM105B   |
| ENSG00000154127 | 9.362260424 | 9.430707456 | protein_coding | 11 | 122526383 | 122685181 | UBASH3B   |
| ENSG00000154133 | 8.552470601 | 10.47418196 | protein_coding | 11 | 124753587 | 124768396 | ROBO4     |
| ENSG00000154134 | 8.29020451  | 9.263397979 | protein_coding | 11 | 124735282 | 124751366 | ROBO3     |
| ENSG00000154144 | 8.635777795 | 8.786767612 | protein_coding | 11 | 124492732 | 124505287 | TBRG1     |
| ENSG00000154146 | 6.738827102 | 6.716673044 | protein_coding | 11 | 124609829 | 124617869 | NRGN      |
| ENSG00000154153 | 2.471521042 | 2.039052734 | protein_coding | 5  | 16473147  | 16617167  | FAM134B   |
| ENSG00000154162 | 0.499066092 | 0           | protein_coding | 5  | 21750777  | 22853731  | CDH12     |
| ENSG00000154174 | 10.23721557 | 10.01063039 | protein_coding | 3  | 100082275 | 100120283 | TOMM70A   |
| ENSG00000154175 | 6.509364082 | 7.926295939 | protein_coding | 3  | 100468000 | 100712359 | ABI3BP    |
| ENSG00000154217 | 6.560798025 | 6.59664425  | protein_coding | 17 | 65373924  | 65689645  | PITPNC1   |
| ENSG00000154222 | 8.453889713 | 8.942603846 | protein_coding | 1  | 52811395  | 52831865  | CC2D1B    |
| ENSG00000154229 | 8.523597116 | 8.338926518 | protein_coding | 17 | 64298944  | 64801114  | PRKCA     |
| ENSG00000154237 | 8.261346552 | 8.371803145 | protein_coding | 15 | 101459420 | 101610317 | LRRK1     |
| ENSG00000154240 | 5.806547963 | 6.429738366 | protein_coding | 17 | 63631656  | 64188194  | CEP112    |
| ENSG00000154252 | 3.871730003 | 3.714580548 | protein_coding | 2  | 242716240 | 242743623 | GAL3ST2   |
| ENSG00000154258 | 0           | 1.16600992  | protein_coding | 17 | 66970629  | 67057136  | ABCA9     |
| ENSG00000154262 | 0           | 0.390640832 | protein_coding | 17 | 67074847  | 67138015  | ABCA6     |
| ENSG00000154263 | 3.335220907 | 4.15321211  | protein_coding | 17 | 67143355  | 67240987  | ABCA10    |
| ENSG00000154265 | 5.785082014 | 7.73528765  | protein_coding | 17 | 67240576  | 67323323  | ABCA5     |

|                 |             |             |                  |    |           |           |          |
|-----------------|-------------|-------------|------------------|----|-----------|-----------|----------|
| ENSG00000154274 | 2.762599152 | 2.912743273 | protein_coding   | 4  | 37455563  | 37625117  | C4orf19  |
| ENSG00000154277 | 4.999881834 | 5.137803333 | protein_coding   | 4  | 41258430  | 41270472  | UCHL1    |
| ENSG00000154305 | 9.608983025 | 9.771851712 | protein_coding   | 1  | 222791428 | 222841354 | MIA3     |
| ENSG00000154309 | 5.191549282 | 5.656642807 | protein_coding   | 1  | 222988406 | 223179337 | DISP1    |
| ENSG00000154310 | 7.925957035 | 7.69255166  | protein_coding   | 3  | 170779128 | 171178197 | TNIK     |
| ENSG00000154316 | 0.869158192 | 1.518964905 | pseudogene       | 8  | 11197146  | 11225961  | TDH      |
| ENSG00000154319 | 7.202688343 | 6.930376707 | protein_coding   | 8  | 11278972  | 11332224  | FAM167A  |
| ENSG00000154328 | 8.223944437 | 7.825075067 | protein_coding   | 8  | 11627144  | 11644855  | NEIL2    |
| ENSG00000154330 | 0.869158192 | 0           | protein_coding   | 9  | 70971815  | 71145977  | PGM5     |
| ENSG00000154342 | 1.407729925 | 0.390640832 | protein_coding   | 1  | 228194752 | 228248961 | WNT3A    |
| ENSG00000154358 | 9.812996626 | 9.691658363 | protein_coding   | 1  | 228395831 | 228566575 | OBSCN    |
| ENSG00000154359 | 6.793601635 | 7.210344614 | protein_coding   | 8  | 12579403  | 12613582  | LONRF1   |
| ENSG00000154370 | 8.900704842 | 8.574870331 | protein_coding   | 1  | 228581377 | 228594541 | TRIM11   |
| ENSG00000154380 | 11.6731518  | 11.24454145 | protein_coding   | 1  | 225677502 | 225840844 | ENAH     |
| ENSG00000154415 | 0           | 0.390640832 | protein_coding   | 7  | 113516832 | 113715975 | PPP1R3A  |
| ENSG00000154429 | 7.811178326 | 8.313767852 | protein_coding   | 1  | 229456758 | 229479041 | C1orf96  |
| ENSG00000154447 | 8.431612753 | 8.434094156 | protein_coding   | 4  | 170015407 | 170192256 | SH3RF1   |
| ENSG00000154451 | 8.077121473 | 8.682523569 | protein_coding   | 1  | 89724633  | 89738544  | GBP5     |
| ENSG00000154473 | 10.57560642 | 11.09176185 | protein_coding   | 10 | 124913793 | 124924886 | BUB3     |
| ENSG00000154479 | 1.799000381 | 2.144285137 | protein_coding   | 2  | 170501935 | 170550943 | C2orf77  |
| ENSG00000154485 | 0.869158192 | 1.518964905 | protein_coding   | 10 | 127455022 | 127464390 | MMP21    |
| ENSG00000154493 | 3.603959378 | 2.912743273 | protein_coding   | 10 | 128113566 | 128359079 | C10orf90 |
| ENSG00000154511 | 7.285281023 | 8.17474298  | protein_coding   | 1  | 93307724  | 93427079  | FAM69A   |
| ENSG00000154518 | 10.2915093  | 10.24050771 | protein_coding   | 2  | 176040986 | 176049335 | ATP5G3   |
| ENSG00000154529 | 0.869158192 | 0           | protein_coding   | 9  | 43684902  | 43924049  | CNTNAP3B |
| ENSG00000154548 | 1.799000381 | 2.039052734 | protein_coding   | 6  | 89805678  | 89827800  | SRSF12   |
| ENSG00000154553 | 2.35979773  | 2.652276565 | protein_coding   | 4  | 186422903 | 186456766 | PDLIM3   |
| ENSG00000154556 | 2.35979773  | 2.652276565 | protein_coding   | 4  | 186506598 | 186877806 | SORSB2   |
| ENSG00000154582 | 8.81194861  | 8.5924114   | protein_coding   | 8  | 74857354  | 74884522  | TCEB1    |
| ENSG00000154589 | 3.004694206 | 4.075511708 | protein_coding   | 8  | 74903587  | 74941322  | LY96     |
| ENSG00000154608 | 2.238690726 | 2.334191469 | pseudogene       | 4  | 119388744 | 119477279 | CEP170P1 |
| ENSG00000154620 | 0           | 0.697730409 | protein_coding   | Y  | 15815447  | 15817904  | TMSB4Y   |
| ENSG00000154639 | 7.886184801 | 8.091661081 | protein_coding   | 21 | 18884700  | 18965897  | CXADR    |
| ENSG00000154640 | 7.556308086 | 8.390640789 | protein_coding   | 21 | 18965971  | 18985265  | BTG3     |
| ENSG00000154642 | 6.96088487  | 7.688207601 | protein_coding   | 21 | 19161284  | 19191703  | C21orf91 |
| ENSG00000154645 | 0.869158192 | 0.697730409 | protein_coding   | 21 | 19165801  | 19639690  | CHODL    |
| ENSG00000154646 | 1.16343121  | 6.577981353 | protein_coding   | 21 | 19641433  | 19858197  | TMPRSS15 |
| ENSG00000154655 | 2.762599152 | 0.950786998 | protein_coding   | 18 | 5954705   | 6414910   | L3MBTL4  |
| ENSG00000154710 | 3.744048221 | 3.081239798 | protein_coding   | 7  | 66205720  | 66276423  | RABGEF1  |
| ENSG00000154719 | 7.587643674 | 8.058387721 | protein_coding   | 21 | 26957968  | 26979829  | MRPL39   |
| ENSG00000154721 | 1.16343121  | 1.802319292 | protein_coding   | 21 | 27011584  | 27089874  | JAM2     |
| ENSG00000154723 | 8.391336806 | 8.853271458 | protein_coding   | 21 | 27088815  | 27107984  | ATP5J    |
| ENSG00000154727 | 7.680671792 | 7.743685008 | protein_coding   | 21 | 27106881  | 27144771  | GABPA    |
| ENSG00000154734 | 1.616589159 | 0           | protein_coding   | 21 | 28208606  | 28217728  | ADAMTS1  |
| ENSG00000154736 | 0.869158192 | 0           | protein_coding   | 21 | 28290231  | 28338832  | ADAMTS5  |
| ENSG00000154743 | 7.530740159 | 7.621426466 | protein_coding   | 3  | 12525931  | 12581122  | TSEN2    |
| ENSG00000154760 | 8.705994399 | 7.252146121 | protein_coding   | 17 | 33762115  | 33775856  | SLFN13   |
| ENSG00000154767 | 8.223944437 | 8.282410365 | protein_coding   | 3  | 14186647  | 14220283  | XPC      |
| ENSG00000154781 | 6.820228284 | 6.963107483 | protein_coding   | 3  | 14693271  | 14714166  | C3orf19  |
| ENSG00000154783 | 0           | 0.950786998 | protein_coding   | 3  | 14860469  | 14975895  | FGD5     |
| ENSG00000154803 | 9.563214301 | 10.68152763 | protein_coding   | 17 | 17115526  | 17140502  | FLCN     |
| ENSG00000154813 | 7.440941622 | 7.774746834 | protein_coding   | 3  | 16299485  | 16306479  | DPH3     |
| ENSG00000154814 | 6.851544845 | 7.138927266 | protein_coding   | 3  | 16306706  | 16378822  | OXNAD1   |
| ENSG00000154822 | 0.869158192 | 0           | protein_coding   | 3  | 16844159  | 17132094  | PLCL2    |
| ENSG00000154832 | 8.978417134 | 9.29944532  | protein_coding   | 18 | 47808713  | 47814692  | CXXC1    |
| ENSG00000154839 | 7.985986001 | 8.013952351 | protein_coding   | 18 | 47901365  | 47920543  | SKA1     |
| ENSG00000154845 | 9.877806407 | 9.528108569 | protein_coding   | 18 | 9546789   | 9614567   | PPP4R1   |
| ENSG00000154864 | 0.499066092 | 0.697730409 | protein_coding   | 18 | 10670238  | 11148761  | PIEZO2   |
| ENSG00000154874 | 2.928422289 | 3.935919592 | processed_transc | 17 | 18431900  | 18528930  | CCDC144B |
| ENSG00000154889 | 5.986594255 | 5.863430791 | protein_coding   | 18 | 11883470  | 11908779  | MPPE1    |
| ENSG00000154898 | 1.799000381 | 1.353254395 | protein_coding   | 17 | 20224477  | 20305504  | CCDC144C |
| ENSG00000154914 | 7.930852348 | 7.795089291 | protein_coding   | 17 | 9548950   | 9633001   | USP43    |
| ENSG00000154917 | 5.858855738 | 6.2290532   | protein_coding   | 3  | 133543083 | 133614680 | RAB6B    |

|                 |             |             |                |    |           |           |          |
|-----------------|-------------|-------------|----------------|----|-----------|-----------|----------|
| ENSG00000154920 | 6.687686437 | 6.923001245 | protein_coding | 17 | 48450581  | 48458820  | EME1     |
| ENSG00000154928 | 0.499066092 | 0           | protein_coding | 3  | 134316643 | 134979309 | EPHB1    |
| ENSG00000154930 | 3.744048221 | 3.935919592 | protein_coding | 20 | 24986868  | 25039616  | ACSS1    |
| ENSG00000154945 | 9.141440458 | 8.625731057 | protein_coding | 17 | 48770553  | 48785285  | ANKRD40  |
| ENSG00000154957 | 6.236372259 | 6.815578497 | protein_coding | 17 | 11880762  | 11900785  | ZNF18    |
| ENSG00000154978 | 10.02699163 | 10.01193453 | protein_coding | 7  | 55503749  | 55640681  | VOPP1    |
| ENSG00000154999 | 0           | 0.950786998 | pseudogene     | 1  | 45457506  | 45457895  |          |
| ENSG00000155008 | 7.618313091 | 7.830998152 | protein_coding | X  | 84258832  | 84344972  | APOOL    |
| ENSG00000155011 | 0.499066092 | 0           | protein_coding | 4  | 107842959 | 108204963 | DKK2     |
| ENSG00000155016 | 4.517578978 | 4.810179682 | protein_coding | 4  | 108852525 | 108874613 | CYP2U1   |
| ENSG00000155026 | 0           | 1.16600992  | protein_coding | 7  | 5965177   | 6010314   | RSPH10B  |
| ENSG00000155034 | 8.360827871 | 7.745776733 | protein_coding | 7  | 5470966   | 5553429   | FBXL18   |
| ENSG00000155066 | 9.806352596 | 5.496926774 | protein_coding | 2  | 95940201  | 95957056  | PROM2    |
| ENSG00000155070 | 1.960915222 | 1.667587519 | pseudogene     | 7  | 6895116   | 6899461   | UNC93B2  |
| ENSG00000155085 | 2.762599152 | 3.081239798 | protein_coding | 6  | 109814059 | 110012420 | AKD1     |
| ENSG00000155090 | 9.557686483 | 8.948064416 | protein_coding | 8  | 103661007 | 103668130 | KLF10    |
| ENSG00000155093 | 2.238690726 | 1.802319292 | protein_coding | 7  | 157331750 | 158380480 | PTPRN2   |
| ENSG00000155096 | 11.13130637 | 10.73410026 | protein_coding | 8  | 103838585 | 103906092 | AZIN1    |
| ENSG00000155097 | 9.178957949 | 9.230913712 | protein_coding | 8  | 104033291 | 104085279 | ATP6V1C1 |
| ENSG00000155099 | 5.977159882 | 6.002883551 | protein_coding | 8  | 92006024  | 92053292  | TMEM55A  |
| ENSG00000155100 | 7.246540262 | 6.716673044 | protein_coding | 8  | 92082424  | 92099323  | OTUD6B   |
| ENSG00000155111 | 7.556308086 | 7.929979971 | protein_coding | 6  | 110931181 | 111137161 | CDK19    |
| ENSG00000155115 | 7.808521034 | 7.999999944 | protein_coding | 6  | 111279763 | 111289093 | GTF3C6   |
| ENSG00000155130 | 11.675888   | 11.69333284 | protein_coding | 6  | 114178541 | 114184648 | MARCKS   |
| ENSG00000155158 | 3.989024711 | 3.608232228 | protein_coding | 9  | 15170843  | 15307358  | TTC39B   |
| ENSG00000155189 | 8.75235931  | 8.869669013 | protein_coding | 8  | 6565878   | 6617184   | AGPAT5   |
| ENSG00000155229 | 10.47906555 | 10.52195341 | protein_coding | 10 | 99218081  | 99258551  | MMS19    |
| ENSG00000155252 | 8.884394801 | 9.084062912 | protein_coding | 10 | 99344131  | 99436191  | PI4K2A   |
| ENSG00000155254 | 9.354994343 | 9.555196965 | protein_coding | 10 | 99472930  | 99484694  | MARVELD1 |
| ENSG00000155256 | 7.947856304 | 8.254769334 | protein_coding | 10 | 99496878  | 99520663  | ZFYVE27  |
| ENSG00000155265 | 5.625150983 | 5.339632724 | protein_coding | 10 | 99609996  | 99627782  | GOLGA7B  |
| ENSG00000155269 | 3.077135474 | 0.950786998 | protein_coding | 4  | 8560452   | 8621486   | GPR78    |
| ENSG00000155275 | 6.897280837 | 6.815578497 | protein_coding | 4  | 8437867   | 8495258   | METTL19  |
| ENSG00000155287 | 8.239811039 | 8.478794222 | protein_coding | 10 | 101370282 | 101380535 | SLC25A28 |
| ENSG00000155304 | 9.24628631  | 9.572977394 | protein_coding | 21 | 15743436  | 15755805  | HSPA13   |
| ENSG00000155307 | 0.499066092 | 0           | protein_coding | 21 | 15857549  | 15955723  | SAMSN1   |
| ENSG00000155313 | 8.688758029 | 8.669360359 | protein_coding | 21 | 17102344  | 17252377  | USP25    |
| ENSG00000155324 | 7.911170638 | 7.309836726 | protein_coding | 5  | 125695824 | 125832186 | GRAMD3   |
| ENSG00000155329 | 6.350376764 | 6.677762549 | protein_coding | 5  | 132332677 | 132362296 | ZCCHC10  |
| ENSG00000155330 | 6.872051157 | 7.18590274  | protein_coding | 16 | 46830519  | 46865323  | C16orf87 |
| ENSG00000155363 | 9.656303037 | 9.746483542 | protein_coding | 1  | 113215763 | 113243368 | MOV10    |
| ENSG00000155366 | 10.32629262 | 10.75631725 | protein_coding | 1  | 113243728 | 113250056 | RHOC     |
| ENSG00000155367 | 5.525114348 | 4.226940739 | protein_coding | 1  | 113245236 | 113258099 | PPM1J    |
| ENSG00000155368 | 9.631710027 | 9.291591823 | protein_coding | 2  | 120124497 | 120130126 | DBI      |
| ENSG00000155380 | 11.04391695 | 11.12066061 | protein_coding | 1  | 113454469 | 113499635 | SLC16A1  |
| ENSG00000155393 | 8.513842764 | 8.995422414 | protein_coding | 16 | 50099852  | 50140298  | HEATR3   |
| ENSG00000155428 | 3.077135474 | 2.579085888 | protein_coding | 7  | 72430016  | 72439997  | TRIM74   |
| ENSG00000155438 | 8.78516728  | 8.993663261 | protein_coding | 2  | 122484521 | 122494499 | MKI67IP  |
| ENSG00000155463 | 10.43063729 | 10.59076954 | protein_coding | 14 | 23235731  | 23241007  | OXA1L    |
| ENSG00000155465 | 7.066972635 | 6.952279523 | protein_coding | 14 | 23242431  | 23299029  | SLC7A7   |
| ENSG00000155506 | 11.83841494 | 11.4896766  | protein_coding | 5  | 154092462 | 154197167 | LARP1    |
| ENSG00000155508 | 8.803966282 | 9.042126408 | protein_coding | 5  | 154237113 | 154256353 | CNOT8    |
| ENSG00000155530 | 3.502389126 | 2.912743273 | protein_coding | 7  | 133812052 | 133949343 | LRGUK    |
| ENSG00000155542 | 6.023726639 | 5.908941696 | protein_coding | 5  | 56205087  | 56221359  | C5orf35  |
| ENSG00000155545 | 7.46813618  | 7.287036562 | protein_coding | 5  | 56215429  | 56267502  | MIER3    |
| ENSG00000155561 | 10.89060849 | 10.53319908 | protein_coding | 7  | 135242667 | 135333505 | NUP205   |
| ENSG00000155592 | 5.785082014 | 5.931169853 | protein_coding | 16 | 25247322  | 25269252  | ZKSCAN2  |
| ENSG00000155621 | 6.687686437 | 6.505763096 | protein_coding | 9  | 74526426  | 74600970  | C9orf85  |
| ENSG00000155629 | 3.211941663 | 0.950786998 | protein_coding | 10 | 98353069  | 98480271  | PIK3AP1  |
| ENSG00000155636 | 5.672682881 | 5.908941696 | protein_coding | 2  | 178977151 | 179001531 | RBM45    |
| ENSG00000155640 | 6.92698535  | 7.005624493 | protein_coding | 10 | 98741041  | 98745582  | C10orf12 |
| ENSG00000155657 | 6.62865285  | 6.819555981 | protein_coding | 2  | 179390716 | 179695529 | TTN      |
| ENSG00000155660 | 12.27147725 | 11.96673398 | protein_coding | 7  | 148700154 | 148725733 | PDIA4    |

|                 |             |             |                |    |           |           |          |
|-----------------|-------------|-------------|----------------|----|-----------|-----------|----------|
| ENSG00000155666 | 4.491309013 | 5.555337277 | protein_coding | 16 | 27214807  | 27233089  | JMJD5    |
| ENSG00000155714 | 0.499066092 | 0.697730409 | protein_coding | 16 | 21995186  | 22012433  | PDZD9    |
| ENSG00000155729 | 7.058051099 | 6.941369681 | protein_coding | 2  | 201353675 | 201384507 | KCTD18   |
| ENSG00000155744 | 5.550781289 | 5.456629825 | protein_coding | 2  | 201843216 | 201936394 | FAM126B  |
| ENSG00000155749 | 2.671945279 | 2.721932731 | protein_coding | 2  | 202152994 | 202222121 | ALS2CR12 |
| ENSG00000155754 | 4.491309013 | 4.528525526 | protein_coding | 2  | 202352148 | 202483901 | ALS2CR11 |
| ENSG00000155755 | 7.517784241 | 7.681666888 | protein_coding | 2  | 202484907 | 202508293 | TMEM237  |
| ENSG00000155760 | 6.887241849 | 6.485878328 | protein_coding | 2  | 202899310 | 202903160 | FZD7     |
| ENSG00000155761 | 3.744048221 | 4.508954154 | protein_coding | 1  | 118496484 | 118727846 | SPAG17   |
| ENSG00000155792 | 6.155035276 | 7.343375265 | protein_coding | 8  | 120885957 | 121063152 | DEPTOR   |
| ENSG00000155827 | 9.020358234 | 9.214393111 | protein_coding | 9  | 104296133 | 104325622 | RNF20    |
| ENSG00000155846 | 7.990682129 | 6.99159092  | protein_coding | 5  | 149109861 | 149234585 | PPARGC1B |
| ENSG00000155849 | 0           | 0.390640832 | protein_coding | 7  | 36893961  | 37488852  | ELMO1    |
| ENSG00000155850 | 7.993024472 | 8.899098923 | protein_coding | 5  | 149340300 | 149373018 | SLC26A2  |
| ENSG00000155858 | 6.610461229 | 6.699508919 | protein_coding | 5  | 157170703 | 157187717 | LSM11    |
| ENSG00000155868 | 5.729976786 | 6.445267191 | protein_coding | 5  | 156564423 | 156586030 | MED7     |
| ENSG00000155875 | 0           | 0.697730409 | protein_coding | 9  | 18927656  | 19033251  | FAM154A  |
| ENSG00000155876 | 8.448779323 | 8.917772241 | protein_coding | 9  | 19049372  | 19051019  | RRAGA    |
| ENSG00000155893 | 5.107569429 | 5.855704078 | protein_coding | 3  | 140947568 | 141013748 | ACPL2    |
| ENSG00000155903 | 7.660183591 | 7.892709342 | protein_coding | 3  | 141205889 | 141334184 | RASA2    |
| ENSG00000155906 | 7.049074049 | 7.315480906 | protein_coding | 6  | 151725989 | 151773259 | RMND1    |
| ENSG00000155918 | 4.19837882  | 4.202780776 | protein_coding | 6  | 150339470 | 150346668 | RAET1L   |
| ENSG00000155926 | 1.16343121  | 0.390640832 | protein_coding | 8  | 134048973 | 134115298 | SLA      |
| ENSG00000155957 | 5.036678094 | 5.383282767 | protein_coding | 12 | 66517709  | 66563852  | TMBIM4   |
| ENSG00000155959 | 9.061114416 | 9.33252778  | protein_coding | X  | 154425284 | 154468098 | VBP1     |
| ENSG00000155962 | 0           | 0.697730409 | protein_coding | X  | 154505500 | 154563966 | CLIC2    |
| ENSG00000155974 | 4.734682531 | 5.638744877 | protein_coding | 12 | 66741211  | 67197966  | GRIP1    |
| ENSG00000155975 | 7.990682129 | 8.527023921 | protein_coding | 8  | 17104080  | 17159936  | VPS37A   |
| ENSG00000155980 | 2.928422289 | 3.32456471  | protein_coding | 12 | 57943781  | 57980415  | KIF5A    |
| ENSG00000155984 | 6.496213887 | 6.365895578 | protein_coding | X  | 148678216 | 148713568 | TMEM185A |
| ENSG00000156006 | 0.499066092 | 0.697730409 | protein_coding | 8  | 18248755  | 18258728  | NAT2     |
| ENSG00000156009 | 1.16343121  | 3.64455972  | protein_coding | X  | 149009941 | 149014609 | MAGEA8   |
| ENSG00000156011 | 8.803966282 | 8.176294739 | protein_coding | 8  | 18384811  | 18942240  | PSD3     |
| ENSG00000156017 | 8.101206377 | 8.053329862 | protein_coding | 9  | 77595936  | 77643339  | C9orf41  |
| ENSG00000156026 | 9.144604451 | 8.555921755 | protein_coding | 10 | 74451889  | 74647452  | MCU      |
| ENSG00000156030 | 10.74360174 | 10.4234682  | protein_coding | 14 | 74181825  | 74256988  | C14orf43 |
| ENSG00000156042 | 2.762599152 | 3.532712221 | protein_coding | 10 | 75013517  | 75119452  | TTC18    |
| ENSG00000156049 | 0.499066092 | 0.697730409 | protein_coding | 9  | 80037995  | 80263223  | GNA14    |
| ENSG00000156050 | 5.018397273 | 5.593003837 | protein_coding | 14 | 74398204  | 74417117  | FAM161B  |
| ENSG00000156052 | 9.611271904 | 9.557580388 | protein_coding | 9  | 80331003  | 80646374  | GNAQ     |
| ENSG00000156097 | 0.499066092 | 0.950786998 | protein_coding | 1  | 110082494 | 110091028 | GPR61    |
| ENSG00000156103 | 0.869158192 | 0           | protein_coding | 8  | 89044237  | 89340254  | MMP16    |
| ENSG00000156110 | 9.410371954 | 9.245030827 | protein_coding | 10 | 75910960  | 76469061  | ADK      |
| ENSG00000156113 | 0.869158192 | 0.697730409 | protein_coding | 10 | 78637355  | 79398353  | KCNMA1   |
| ENSG00000156127 | 0.869158192 | 0           | protein_coding | 14 | 75988768  | 76013358  | BATF     |
| ENSG00000156136 | 7.292905885 | 7.558560655 | protein_coding | 4  | 71858255  | 71896631  | DCK      |
| ENSG00000156140 | 0.869158192 | 1.353254395 | protein_coding | 4  | 73146686  | 73434516  | ADAMTS3  |
| ENSG00000156150 | 0           | 0.390640832 | protein_coding | 1  | 110602616 | 110613234 | ALX3     |
| ENSG00000156162 | 7.68357507  | 7.637287497 | protein_coding | 8  | 95731931  | 95806064  | DPY19L4  |
| ENSG00000156170 | 6.509364082 | 6.988061092 | protein_coding | 8  | 95907995  | 96128683  | C8orf38  |
| ENSG00000156171 | 7.222786417 | 7.485338407 | protein_coding | 1  | 111659955 | 111682838 | DRAM2    |
| ENSG00000156172 | 4.821592551 | 5.163066621 | protein_coding | 8  | 96257147  | 96281429  | C8orf37  |
| ENSG00000156194 | 0           | 0.390640832 | protein_coding | 4  | 76781020  | 76823724  | PPEF2    |
| ENSG00000156206 | 2.35979773  | 2.242360793 | protein_coding | 15 | 81299374  | 81441516  | C15orf26 |
| ENSG00000156219 | 0           | 0.697730409 | protein_coding | 4  | 76932337  | 77033955  | ART3     |
| ENSG00000156222 | 3.502389126 | 2.971122874 | protein_coding | 15 | 85427885  | 85518876  | SLC28A1  |
| ENSG00000156232 | 7.277615649 | 7.164171052 | protein_coding | 15 | 83477973  | 83503611  | WHAMM    |
| ENSG00000156239 | 5.613019223 | 5.988823159 | protein_coding | 21 | 30244513  | 30257693  | N6AMT1   |
| ENSG00000156253 | 6.567100227 | 6.729413443 | protein_coding | 21 | 30376705  | 30391699  | RWDD2B   |
| ENSG00000156256 | 8.80263159  | 8.979512278 | protein_coding | 21 | 30396950  | 30426809  | USP16    |
| ENSG00000156261 | 10.69227275 | 10.90504292 | protein_coding | 21 | 30428126  | 30446118  | CCT8     |
| ENSG00000156265 | 6.068837212 | 6.775188634 | protein_coding | 21 | 30449792  | 30548210  | C21orf7  |
| ENSG00000156273 | 8.731468881 | 8.956216712 | protein_coding | 21 | 30566392  | 31009660  | BACH1    |

|                 |             |             |                |   |    |           |           |           |
|-----------------|-------------|-------------|----------------|---|----|-----------|-----------|-----------|
| ENSG00000156298 | 0           | 1.16600992  | protein_coding | X |    | 38420623  | 38548169  | TSPAN7    |
| ENSG00000156299 | 7.945439403 | 7.572769481 | protein_coding |   | 21 | 32361860  | 32932290  | TIAM1     |
| ENSG00000156304 | 9.25411951  | 9.15109385  | protein_coding |   | 21 | 33043313  | 33104431  | SCAF4     |
| ENSG00000156313 | 6.716321419 | 7.260948155 | protein_coding | X |    | 38128424  | 38186817  | RPGR      |
| ENSG00000156345 | 7.04004079  | 7.436965343 | protein_coding |   | 9  | 90581356  | 90589695  | CDK20     |
| ENSG00000156374 | 7.478203418 | 8.078443681 | protein_coding |   | 10 | 105062553 | 105110891 | PCGF6     |
| ENSG00000156381 | 7.007971391 | 5.759604001 | protein_coding |   | 14 | 102973179 | 102976136 | ANKRD9    |
| ENSG00000156384 | 6.379315619 | 6.587342979 | protein_coding |   | 10 | 105881816 | 105886143 | SFR1      |
| ENSG00000156398 | 6.023726639 | 6.831423059 | protein_coding |   | 10 | 104474297 | 104498951 | SFXN2     |
| ENSG00000156411 | 9.406862641 | 9.13522434  | protein_coding |   | 14 | 104378625 | 104394606 | C14orf2   |
| ENSG00000156413 | 1.616589159 | 0.697730409 | protein_coding |   | 19 | 5830621   | 5839742   | FUT6      |
| ENSG00000156414 | 10.52995925 | 10.074019   | protein_coding |   | 14 | 104394799 | 104519004 | TDRD9     |
| ENSG00000156427 | 1.407729925 | 2.039052734 | protein_coding |   | 5  | 170846660 | 170884627 | FGF18     |
| ENSG00000156453 | 9.985833897 | 4.489113623 | protein_coding |   | 5  | 141232938 | 141258811 | PCDH1     |
| ENSG00000156463 | 9.099664364 | 9.008548131 | protein_coding |   | 5  | 145316142 | 145461354 | SH3RF2    |
| ENSG00000156467 | 8.833021386 | 9.15896362  | protein_coding |   | 8  | 97238148  | 97247862  | UQCRB     |
| ENSG00000156469 | 7.491518048 | 7.584504199 | protein_coding |   | 8  | 97251626  | 97273838  | MTERFD1   |
| ENSG00000156471 | 9.873363279 | 9.731256878 | protein_coding |   | 8  | 97273943  | 97349223  | PTDSS1    |
| ENSG00000156482 | 11.14900701 | 11.30625618 | protein_coding |   | 8  | 99037079  | 99058697  | RPL30     |
| ENSG00000156486 | 0.869158192 | 0.697730409 | protein_coding |   | 8  | 99439250  | 99445076  | KCNS2     |
| ENSG00000156500 | 6.068837212 | 5.647721597 | protein_coding | X |    | 133930819 | 133988640 | FAM122C   |
| ENSG00000156502 | 9.043142548 | 9.038718229 | protein_coding |   | 10 | 70939988  | 70968855  | SUPV3L1   |
| ENSG00000156504 | 9.468760142 | 9.511607983 | protein_coding | X |    | 133903596 | 133931262 | FAM122B   |
| ENSG00000156508 | 12.02923891 | 12.3668652  | protein_coding |   | 6  | 74225473  | 74233520  | EEF1A1    |
| ENSG00000156509 | 3.950976309 | 4.94736961  | protein_coding |   | 8  | 101145588 | 101158028 | FBXO43    |
| ENSG00000156510 | 9.427791605 | 9.397831074 | protein_coding |   | 10 | 70980059  | 71027315  | HKDC1     |
| ENSG00000156515 | 11.69183672 | 11.29362229 | protein_coding |   | 10 | 71029740  | 71161638  | HK1       |
| ENSG00000156521 | 8.855079001 | 8.166959047 | protein_coding |   | 10 | 71897737  | 71906432  | TYSD1     |
| ENSG00000156531 | 9.459473748 | 9.6397377   | protein_coding | X |    | 133507283 | 133562820 | PHF6      |
| ENSG00000156535 | 9.6309582   | 9.389159064 | protein_coding |   | 6  | 74405508  | 74538040  | CD109     |
| ENSG00000156574 | 3.004694206 | 2.039052734 | protein_coding |   | 10 | 72192071  | 72207707  | NODAL     |
| ENSG00000156587 | 9.690621167 | 10.31036334 | protein_coding |   | 11 | 57319129  | 57335757  | UBE2L6    |
| ENSG00000156599 | 10.68069471 | 10.69295559 | protein_coding |   | 11 | 57435219  | 57468659  | ZDHHCS    |
| ENSG00000156603 | 7.1740722   | 7.586839732 | protein_coding |   | 11 | 57471186  | 57479693  | MED19     |
| ENSG00000156639 | 9.976394534 | 9.89664616  | protein_coding |   | 6  | 37787275  | 38122400  | ZFAND3    |
| ENSG00000156642 | 9.784207642 | 10.0814915  | protein_coding |   | 15 | 73852355  | 73926475  | NPTN      |
| ENSG00000156650 | 8.00028772  | 7.586839732 | protein_coding |   | 10 | 76585340  | 76792380  | KAT6B     |
| ENSG00000156671 | 8.314756163 | 7.619146302 | protein_coding |   | 10 | 76859344  | 76941881  | SAMD8     |
| ENSG00000156675 | 9.290757201 | 8.381252713 | protein_coding |   | 8  | 37716136  | 37756985  | RAB11FIP1 |
| ENSG00000156697 | 9.14670993  | 9.338084052 | protein_coding | X |    | 129040097 | 129063737 | UTP14A    |
| ENSG00000156709 | 10.12368915 | 10.49888563 | protein_coding | X |    | 129263337 | 129299861 | AIFM1     |
| ENSG00000156711 | 7.734859118 | 5.96747225  | protein_coding |   | 6  | 36095586  | 36107842  | MAPK13    |
| ENSG00000156735 | 7.481543613 | 7.454976247 | protein_coding |   | 8  | 38034051  | 38070819  | BAG4      |
| ENSG00000156750 | 2.762599152 | 0.390640832 | pseudogene     |   | 9  | 42858072  | 42876505  | AQP7P3    |
| ENSG00000156755 | 0           | 0.390640832 | pseudogene     |   | 9  | 69777099  | 69777956  |           |
| ENSG00000156787 | 7.868433623 | 7.477807561 | protein_coding |   | 8  | 124054208 | 124164393 | WDR67     |
| ENSG00000156795 | 6.442380648 | 5.638744877 | protein_coding |   | 8  | 124428965 | 124479470 | WDYHV1    |
| ENSG00000156802 | 9.46791839  | 9.576507334 | protein_coding |   | 8  | 124332090 | 124428590 | ATAD2     |
| ENSG00000156804 | 9.649637321 | 8.103127799 | protein_coding |   | 8  | 124510129 | 124553446 | FBXO32    |
| ENSG00000156831 | 6.710639711 | 6.858739095 | protein_coding |   | 8  | 126103921 | 126379362 | NSMCE2    |
| ENSG00000156853 | 7.381392865 | 7.714077892 | protein_coding |   | 16 | 30613879  | 30635333  | ZNF689    |
| ENSG00000156858 | 9.062230259 | 9.421577335 | protein_coding |   | 16 | 30662038  | 30667761  | PRR14     |
| ENSG00000156860 | 10.43667292 | 10.32617591 | protein_coding |   | 16 | 30669752  | 30682131  | FBRS      |
| ENSG00000156869 | 6.400645076 | 5.545764946 | protein_coding |   | 1  | 100174259 | 100232187 | FRRS1     |
| ENSG00000156873 | 8.398422578 | 8.454700467 | protein_coding |   | 16 | 30759591  | 30772490  | PHKG2     |
| ENSG00000156875 | 8.662511098 | 8.607443034 | protein_coding |   | 1  | 100503653 | 100548933 | HIAT1     |
| ENSG00000156876 | 7.071412799 | 7.41347308  | protein_coding |   | 1  | 100549119 | 100598511 | SASS6     |
| ENSG00000156886 | 1.799000381 | 2.242360793 | protein_coding |   | 16 | 31404597  | 31437826  | ITGAD     |
| ENSG00000156920 | 0.499066092 | 0           | protein_coding | X |    | 135383122 | 135519215 | GPR112    |
| ENSG00000156928 | 8.288298501 | 8.26792849  | protein_coding |   | 7  | 23338358  | 23351348  | C7orf30   |
| ENSG00000156931 | 7.873527714 | 8.162268448 | protein_coding |   | 3  | 184529931 | 184770402 | VPS8      |
| ENSG00000156958 | 6.782811835 | 6.563824016 | protein_coding |   | 15 | 49447853  | 49660066  | GALK2     |
| ENSG00000156959 | 0.869158192 | 0           | protein_coding |   | 3  | 9543481   | 9595486   | LHFPL4    |



|                 |             |             |                  |    |           |           |           |
|-----------------|-------------|-------------|------------------|----|-----------|-----------|-----------|
| ENSG00000156966 | 7.246540262 | 4.604259349 | protein_coding   | 2  | 232260254 | 232265875 | B3GNT7    |
| ENSG00000156968 | 0.499066092 | 0.697730409 | protein_coding   | 16 | 15489611  | 15503458  | MPV17L    |
| ENSG00000156970 | 9.386516735 | 9.280091692 | protein_coding   | 15 | 40453224  | 40513337  | BUB1B     |
| ENSG00000156973 | 7.876068031 | 7.968104748 | protein_coding   | 2  | 232597135 | 232650982 | PDE6D     |
| ENSG00000156976 | 10.89217803 | 11.38066227 | protein_coding   | 3  | 186500994 | 186507689 | EIF4A2    |
| ENSG00000156983 | 8.602416377 | 8.149685112 | protein_coding   | 3  | 9773413   | 9789702   | BRPF1     |
| ENSG00000156990 | 8.320363082 | 8.43019749  | protein_coding   | 3  | 9879533   | 9886286   | RPUSD3    |
| ENSG00000157014 | 9.272554655 | 8.916844293 | protein_coding   | 3  | 10289707  | 10327480  | TATDN2    |
| ENSG00000157017 | 3.603959378 | 3.570966319 | protein_coding   | 3  | 10327359  | 10334631  | GHRL      |
| ENSG00000157020 | 10.22231885 | 10.29187254 | protein_coding   | 3  | 10334815  | 10362862  | SEC13     |
| ENSG00000157021 | 0.499066092 | 0.390640832 | pseudogene       | 15 | 41455322  | 41456695  | FAM92A1P1 |
| ENSG00000157036 | 6.313367288 | 6.695185789 | protein_coding   | 3  | 38537618  | 38583652  | EXOG      |
| ENSG00000157045 | 7.978913023 | 8.006993014 | protein_coding   | 16 | 15131710  | 15149921  | NTAN1     |
| ENSG00000157060 | 2.238690726 | 1.667587519 | protein_coding   | 1  | 182869000 | 182922660 | SHCBP1L   |
| ENSG00000157064 | 6.041940478 | 4.363974406 | protein_coding   | 1  | 183217372 | 183387737 | NMNAT2    |
| ENSG00000157077 | 7.348842929 | 7.612284109 | protein_coding   | 1  | 52608046  | 52812358  | ZFYVE9    |
| ENSG00000157087 | 0.499066092 | 0           | protein_coding   | 3  | 10365707  | 10749716  | ATP2B2    |
| ENSG00000157106 | 10.78034131 | 10.93353768 | protein_coding   | 16 | 18816175  | 18937776  | SMG1      |
| ENSG00000157107 | 7.406211319 | 7.266786485 | protein_coding   | 5  | 72251808  | 72386349  | FCHO2     |
| ENSG00000157110 | 7.64536895  | 8.226588358 | protein_coding   | 8  | 30241944  | 30429778  | RBPMS     |
| ENSG00000157111 | 5.375152132 | 4.202780776 | protein_coding   | 5  | 72416119  | 72427644  | TMEM171   |
| ENSG00000157150 | 5.795854912 | 3.935919592 | protein_coding   | 3  | 12194551  | 12200851  | TIMP4     |
| ENSG00000157152 | 2.671945279 | 1.802319292 | polymorphic_pse  | 3  | 12045862  | 12232907  | SYN2      |
| ENSG00000157168 | 8.327805238 | 7.819127564 | protein_coding   | 8  | 31496902  | 32622548  | NRG1      |
| ENSG00000157181 | 7.416718478 | 7.825075067 | protein_coding   | 1  | 186344890 | 186390507 | C1orf27   |
| ENSG00000157184 | 7.430610036 | 7.164171052 | protein_coding   | 1  | 53662101  | 53679869  | CPT2      |
| ENSG00000157191 | 9.045401313 | 9.223427792 | protein_coding   | 1  | 16767167  | 16786573  | NECAP2    |
| ENSG00000157193 | 8.620709081 | 8.338926518 | protein_coding   | 1  | 53711217  | 53793742  | LRP8      |
| ENSG00000157211 | 0.499066092 | 0.390640832 | protein_coding   | 1  | 54598747  | 54619443  | CDCP2     |
| ENSG00000157212 | 8.546104025 | 8.409235632 | protein_coding   | 7  | 154735397 | 154794794 | PAXIP1    |
| ENSG00000157214 | 7.913645586 | 7.116470702 | protein_coding   | 7  | 89796904  | 89870091  | STEAP2    |
| ENSG00000157216 | 7.409722215 | 7.541804862 | protein_coding   | 1  | 54692190  | 54879152  | SSBP3     |
| ENSG00000157224 | 8.847332411 | 8.737164829 | protein_coding   | 7  | 90013035  | 90142716  | CLDN12    |
| ENSG00000157227 | 12.72863472 | 12.68052698 | protein_coding   | 14 | 23305766  | 23318236  | MMP14     |
| ENSG00000157240 | 6.917151646 | 6.45552765  | protein_coding   | 7  | 90893783  | 90898123  | FZD1      |
| ENSG00000157259 | 8.368064704 | 8.088368066 | protein_coding   | 7  | 92076767  | 92088150  | GATAD1    |
| ENSG00000157303 | 6.897280837 | 5.372493443 | protein_coding   | 9  | 95820989  | 95847420  | SUSD3     |
| ENSG00000157306 | 2.471521042 | 3.993387124 | processed_transc | 14 | 23980969  | 24029987  |           |
| ENSG00000157315 | 2.928422289 | 2.420525079 | protein_coding   | 16 | 69377151  | 69385712  | TMED6     |
| ENSG00000157322 | 1.16343121  | 0.950786998 | protein_coding   | 16 | 69984810  | 69998141  | CLEC18A   |
| ENSG00000157326 | 6.204385613 | 6.733635362 | protein_coding   | 14 | 24422795  | 24438488  | DHRS4     |
| ENSG00000157335 | 1.16343121  | 0.390640832 | protein_coding   | 16 | 70207225  | 70221264  | CLEC18C   |
| ENSG00000157343 | 2.238690726 | 3.027231696 | protein_coding   | 6  | 35704809  | 35716856  | ARMC12    |
| ENSG00000157349 | 7.071412799 | 7.033288635 | protein_coding   | 16 | 70323566  | 70369186  | DDX19B    |
| ENSG00000157350 | 9.902313564 | 9.177677745 | protein_coding   | 16 | 70413338  | 70473140  | ST3GAL2   |
| ENSG00000157353 | 7.863321481 | 7.862183683 | protein_coding   | 16 | 70488498  | 70514177  | FUK       |
| ENSG00000157368 | 4.062237333 | 4.976162367 | protein_coding   | 16 | 70613798  | 70694585  | IL34      |
| ENSG00000157379 | 6.442380648 | 7.281279771 | protein_coding   | 14 | 24759804  | 24769039  | DHRS1     |
| ENSG00000157388 | 0.499066092 | 0           | protein_coding   | 3  | 53528683  | 53846490  | CACNA1D   |
| ENSG00000157423 | 4.491309013 | 4.448594745 | protein_coding   | 16 | 70841281  | 71264625  | HYDIN     |
| ENSG00000157426 | 6.882196036 | 7.170413581 | protein_coding   | 4  | 57204456  | 57253666  | AASDH     |
| ENSG00000157429 | 3.004694206 | 4.710890357 | protein_coding   | 16 | 71507493  | 71598992  | ZNF19     |
| ENSG00000157445 | 0.499066092 | 0.390640832 | protein_coding   | 3  | 54156574  | 55108584  | CACNA2D3  |
| ENSG00000157450 | 8.440221571 | 8.374509343 | protein_coding   | 15 | 59157374  | 59389618  | RNF111    |
| ENSG00000157456 | 9.090943324 | 9.079923694 | protein_coding   | 15 | 59397277  | 59417244  | CCNB2     |
| ENSG00000157470 | 6.835971536 | 6.535085617 | protein_coding   | 15 | 59664892  | 59815748  | FAM81A    |
| ENSG00000157483 | 10.1470152  | 9.776974532 | protein_coding   | 15 | 59427113  | 59665099  | MYO1E     |
| ENSG00000157500 | 8.894453552 | 8.852301067 | protein_coding   | 3  | 57261765  | 57312980  | APPL1     |
| ENSG00000157510 | 6.155035276 | 6.270323763 | protein_coding   | 5  | 148651434 | 148721365 | AFAP1L1   |
| ENSG00000157514 | 8.561968095 | 7.572769481 | protein_coding   | X  | 106956451 | 107020572 | TSC22D3   |
| ENSG00000157538 | 8.295907473 | 8.253299769 | protein_coding   | 21 | 38591910  | 38640262  | DSCR3     |
| ENSG00000157540 | 8.596266901 | 8.454700467 | protein_coding   | 21 | 38739236  | 38887680  | DYRK1A    |
| ENSG00000157551 | 0.499066092 | 0.390640832 | protein_coding   | 21 | 39529128  | 39673748  | KCNJ15    |

|                 |             |             |                |    |           |           |             |
|-----------------|-------------|-------------|----------------|----|-----------|-----------|-------------|
| ENSG00000157557 | 9.969274259 | 9.445582628 | protein_coding | 21 | 40177231  | 40196879  | ETS2        |
| ENSG00000157570 | 2.671945279 | 2.144285137 | protein_coding | 11 | 44748015  | 44953972  | TSPAN18     |
| ENSG00000157578 | 3.950976309 | 4.547834947 | protein_coding | 21 | 40777770  | 40817731  | LCA5L       |
| ENSG00000157593 | 9.471282455 | 9.547423533 | protein_coding | 6  | 44221833  | 44225291  | SLC35B2     |
| ENSG00000157600 | 9.953725374 | 9.780549713 | protein_coding | X  | 109245859 | 109425962 | TMEM164     |
| ENSG00000157601 | 9.145657575 | 10.20787732 | protein_coding | 21 | 42792231  | 42831141  | MX1         |
| ENSG00000157613 | 10.72328876 | 10.44261478 | protein_coding | 11 | 46299212  | 46342972  | CREB3L1     |
| ENSG00000157617 | 8.500733514 | 8.631398847 | protein_coding | 21 | 43305221  | 43373999  | C2CD2       |
| ENSG00000157625 | 10.16010253 | 9.762067953 | protein_coding | X  | 30845559  | 30993201  | TAB3        |
| ENSG00000157637 | 10.02011733 | 10.28325773 | protein_coding | 17 | 79218800  | 79269347  | SLC38A10    |
| ENSG00000157653 | 3.78787645  | 4.021284656 | protein_coding | 9  | 116172334 | 116191964 | C9orf43     |
| ENSG00000157654 | 1.407729925 | 1.353254395 | protein_coding | 9  | 112542589 | 112934792 | PALM2-AKAP2 |
| ENSG00000157657 | 8.349904097 | 7.497803111 | protein_coding | 9  | 116638562 | 116818871 | ZNF618      |
| ENSG00000157680 | 4.19837882  | 3.64455972  | protein_coding | 7  | 137073563 | 137531838 | DGKI        |
| ENSG00000157693 | 8.179389493 | 8.242970684 | protein_coding | 9  | 117373486 | 117408702 | C9orf91     |
| ENSG00000157734 | 3.830412367 | 4.604259349 | protein_coding | 15 | 64443914  | 64449680  | SNX22       |
| ENSG00000157741 | 8.484177644 | 8.352716275 | protein_coding | 7  | 138915102 | 138992981 | UBN2        |
| ENSG00000157764 | 7.289098491 | 6.827478203 | protein_coding | 7  | 140424943 | 140624564 | BRAF        |
| ENSG00000157765 | 6.121171528 | 5.22435463  | protein_coding | 4  | 25656923  | 25680370  | SLC34A2     |
| ENSG00000157766 | 0           | 0.390640832 | protein_coding | 15 | 89346674  | 89418585  | ACAN        |
| ENSG00000157778 | 8.677151638 | 8.752849683 | protein_coding | 7  | 1606966   | 1610641   | PSMG3       |
| ENSG00000157782 | 0.499066092 | 0.390640832 | protein_coding | 12 | 121078355 | 121105127 | CABP1       |
| ENSG00000157796 | 7.615275323 | 8.386624806 | protein_coding | 4  | 39184024  | 39287430  | WDR19       |
| ENSG00000157800 | 8.996041004 | 8.375860541 | protein_coding | 7  | 139993493 | 140104233 | SLC37A3     |
| ENSG00000157823 | 7.035502862 | 6.729413443 | protein_coding | 15 | 90373831  | 90437574  | AP3S2       |
| ENSG00000157827 | 10.08413733 | 10.02921141 | protein_coding | 2  | 153191751 | 153506348 | FMNL2       |
| ENSG00000157833 | 6.693459083 | 6.051043053 | protein_coding | 2  | 26395960  | 26412513  | FAM59B      |
| ENSG00000157837 | 8.697401955 | 8.454700467 | protein_coding | 12 | 121200313 | 121342174 |             |
| ENSG00000157856 | 0           | 0.390640832 | protein_coding | 2  | 26624784  | 26679579  | CCDC164     |
| ENSG00000157869 | 6.220467583 | 6.646756201 | protein_coding | 4  | 13362978  | 13485989  | RAB28       |
| ENSG00000157870 | 8.146099194 | 8.031205224 | protein_coding | 1  | 2517930   | 2522908   | FAM213B     |
| ENSG00000157873 | 6.830742851 | 7.57041104  | protein_coding | 1  | 2487078   | 2497061   | TNFRSF14    |
| ENSG00000157881 | 7.575190993 | 7.915187059 | protein_coding | 1  | 2439972   | 2458039   | PANK4       |
| ENSG00000157890 | 3.077135474 | 3.748356452 | protein_coding | 15 | 66187417  | 66546085  | MEGF11      |
| ENSG00000157895 | 5.301468762 | 4.640685763 | protein_coding | 12 | 121440243 | 121454305 | C12orf43    |
| ENSG00000157911 | 8.441937187 | 8.602834575 | protein_coding | 1  | 2336236   | 2345236   | PEX10       |
| ENSG00000157916 | 9.382055486 | 9.591123153 | protein_coding | 1  | 2323267   | 2335190   | RER1        |
| ENSG00000157927 | 7.759833327 | 7.292770473 | protein_coding | 7  | 4836686   | 4923350   | RADIL       |
| ENSG00000157933 | 10.22531053 | 9.84538481  | protein_coding | 1  | 2160134   | 2241558   | SKI         |
| ENSG00000157954 | 10.150167   | 10.12271748 | protein_coding | 7  | 5229819   | 5273457   | WIPI2       |
| ENSG00000157978 | 8.705994399 | 8.461080043 | protein_coding | 1  | 25870071  | 25895377  | LDLRAP1     |
| ENSG00000157985 | 8.717371959 | 8.379906558 | protein_coding | 2  | 236402733 | 237035198 | AGAP1       |
| ENSG00000157992 | 5.60078458  | 3.183544561 | protein_coding | 2  | 27665233  | 27669348  | KRTCAP3     |
| ENSG00000157999 | 4.261916566 | 3.608232228 | protein_coding | 7  | 6071007   | 6076017   | ANKRD61     |
| ENSG00000158006 | 6.979904289 | 7.10998981  | protein_coding | 1  | 26286258  | 26324648  | PAFAH2      |
| ENSG00000158008 | 1.616589159 | 1.667587519 | protein_coding | 1  | 26346375  | 26362955  | EXTL1       |
| ENSG00000158014 | 0.499066092 | 0           | protein_coding | 1  | 26363743  | 26372624  | SLC30A2     |
| ENSG00000158019 | 8.474152153 | 8.323603978 | protein_coding | 2  | 28112808  | 28561768  | BRE         |
| ENSG00000158023 | 7.587643674 | 7.20731193  | protein_coding | 12 | 122355768 | 122441833 | WDR66       |
| ENSG00000158042 | 9.129779423 | 10.06273716 | protein_coding | 11 | 6702013   | 6704632   | MRPL17      |
| ENSG00000158050 | 8.405473719 | 6.633261019 | protein_coding | 2  | 96808905  | 96811179  | DUSP2       |
| ENSG00000158055 | 0.499066092 | 0           | protein_coding | 1  | 24645812  | 24690972  | GRHL3       |
| ENSG00000158062 | 7.945439403 | 8.38930337  | protein_coding | 1  | 26607819  | 26644854  | UBXN11      |
| ENSG00000158079 | 7.440941622 | 7.607691112 | protein_coding | 9  | 96793076  | 96872138  | PTPDC1      |
| ENSG00000158089 | 0.499066092 | 0           | protein_coding | 2  | 31133333  | 31378068  | GALNT14     |
| ENSG00000158092 | 7.654275977 | 8.068450553 | protein_coding | 3  | 136581050 | 136668665 | NCK1        |
| ENSG00000158104 | 4.437288965 | 3.133298822 | protein_coding | 12 | 122277433 | 122326517 | HPD         |
| ENSG00000158106 | 7.603059879 | 7.749951106 | protein_coding | 8  | 144451057 | 144466390 | RHPN1       |
| ENSG00000158109 | 7.886184801 | 7.641787375 | protein_coding | 1  | 3541566   | 3546691   | TPRG1L      |
| ENSG00000158113 | 0.869158192 | 1.802319292 | protein_coding | 12 | 122652285 | 122688018 | LRRC43      |
| ENSG00000158122 | 7.660183591 | 7.012590419 | protein_coding | 9  | 99401859  | 99417599  | C9orf21     |
| ENSG00000158125 | 7.062518763 | 4.585695337 | protein_coding | 2  | 31557187  | 31637581  | XDH         |
| ENSG00000158156 | 6.598204782 | 6.673373662 | protein_coding | 1  | 28285973  | 28294607  | XKR8        |

|                 |             |             |                |    |           |           |           |
|-----------------|-------------|-------------|----------------|----|-----------|-----------|-----------|
| ENSG00000158158 | 7.886184801 | 6.977419495 | protein_coding | 2  | 97426639  | 97477628  | CNNM4     |
| ENSG00000158161 | 8.495786671 | 8.286726732 | protein_coding | 1  | 28296855  | 28415207  | EYA3      |
| ENSG00000158163 | 6.095241663 | 6.304782526 | protein_coding | 3  | 137780832 | 137834660 | DZIP1L    |
| ENSG00000158169 | 8.610066544 | 8.519708104 | protein_coding | 9  | 97861336  | 98079991  | FANCC     |
| ENSG00000158186 | 8.233881494 | 8.641545092 | protein_coding | 3  | 138066539 | 138124375 | MRAS      |
| ENSG00000158195 | 10.81252605 | 10.43388431 | protein_coding | 1  | 27730730  | 27816669  | WASF2     |
| ENSG00000158201 | 7.498129565 | 6.811590016 | protein_coding | 18 | 19230858  | 19284766  | ABHD3     |
| ENSG00000158220 | 5.707331524 | 6.123616685 | protein_coding | 3  | 138153428 | 138200528 | ESYT3     |
| ENSG00000158234 | 7.0218028   | 7.572769481 | protein_coding | 3  | 138327448 | 138352218 | FAIM      |
| ENSG00000158246 | 7.35977471  | 7.400254612 | protein_coding | 1  | 27331511  | 27339327  | FAM46B    |
| ENSG00000158258 | 0.499066092 | 1.353254395 | protein_coding | 3  | 139654027 | 140286919 | CLSTN2    |
| ENSG00000158270 | 0           | 0.390640832 | protein_coding | 18 | 319355    | 500729    | COLEC12   |
| ENSG00000158286 | 8.462367008 | 8.513583123 | protein_coding | 1  | 6265535   | 6281359   | RNF207    |
| ENSG00000158290 | 10.38988939 | 10.52408771 | protein_coding | X  | 119658464 | 119709649 | CUL4B     |
| ENSG00000158292 | 7.627388205 | 5.9163892   | protein_coding | 1  | 6307406   | 6321035   | GPR153    |
| ENSG00000158296 | 8.510576602 | 8.428896259 | protein_coding | 20 | 45186463  | 45304714  | SLC13A3   |
| ENSG00000158301 | 5.485736881 | 5.236305879 | protein_coding | X  | 101967257 | 101973607 | GPRASP2   |
| ENSG00000158315 | 5.090170488 | 4.508954154 | protein_coding | 1  | 39351479  | 39407471  | RHBDL2    |
| ENSG00000158321 | 4.464551814 | 0           | protein_coding | 7  | 69063905  | 70258054  | AUTS2     |
| ENSG00000158352 | 5.107569429 | 2.242360793 | protein_coding | X  | 50334647  | 50557302  | SHROOM4   |
| ENSG00000158373 | 6.738827102 | 7.329495501 | protein_coding | 6  | 26158349  | 26171577  | HIST1H2BD |
| ENSG00000158402 | 6.861834435 | 7.0637896   | protein_coding | 5  | 137620954 | 137674044 | CDC25C    |
| ENSG00000158406 | 5.346128795 | 5.717592784 | protein_coding | 6  | 26281283  | 26285762  | HIST1H4H  |
| ENSG00000158411 | 7.461385447 | 7.549009758 | protein_coding | 2  | 99777890  | 99797521  | MITD1     |
| ENSG00000158417 | 11.15215447 | 10.90105998 | protein_coding | 2  | 99953816  | 100016728 | EIF5B     |
| ENSG00000158423 | 3.211941663 | 4.101879561 | protein_coding | X  | 53449639  | 53458059  | RIBC1     |
| ENSG00000158427 | 0.499066092 | 0           | protein_coding | X  | 103173479 | 103229570 | TMSB15B   |
| ENSG00000158428 | 1.16343121  | 0.697730409 | protein_coding | 2  | 219221579 | 219232822 | C2orf62   |
| ENSG00000158435 | 9.183066967 | 8.764244491 | protein_coding | 2  | 101869264 | 101886778 | C2orf29   |
| ENSG00000158445 | 2.762599152 | 2.912743273 | protein_coding | 20 | 47984946  | 48099184  | KCNB1     |
| ENSG00000158457 | 2.671945279 | 2.334191469 | protein_coding | 7  | 128784712 | 128808671 | TSPAN33   |
| ENSG00000158467 | 7.578314254 | 7.243290054 | protein_coding | 7  | 128864864 | 129070052 | AHCYL2    |
| ENSG00000158470 | 10.77490668 | 10.9365167  | protein_coding | 20 | 48249482  | 48330415  | B4GALT5   |
| ENSG00000158473 | 0.869158192 | 1.16600992  | protein_coding | 1  | 158149737 | 158154686 | CD1D      |
| ENSG00000158480 | 8.249639777 | 7.749951106 | protein_coding | 20 | 48519928  | 48532080  | SPATA2    |
| ENSG00000158482 | 1.16343121  | 1.16600992  | pseudogene     | 16 | 21391313  | 21403412  | SNX29P1   |
| ENSG00000158483 | 5.986594255 | 5.611474642 | protein_coding | 11 | 71498556  | 71512282  | FAM86C1   |
| ENSG00000158486 | 4.842525946 | 4.65855978  | protein_coding | 16 | 20943804  | 21170762  | DNAH3     |
| ENSG00000158516 | 0.869158192 | 0           | protein_coding | 7  | 129906667 | 129929638 | CPA2      |
| ENSG00000158517 | 0.869158192 | 0.390640832 | protein_coding | 7  | 74188309  | 74203659  | NCF1      |
| ENSG00000158525 | 0           | 1.925536307 | protein_coding | 7  | 129984630 | 130008571 | CPA5      |
| ENSG00000158526 | 8.768856552 | 8.917772241 | protein_coding | X  | 54466834  | 54471920  | TSR2      |
| ENSG00000158528 | 3.698846687 | 0.390640832 | protein_coding | 7  | 94536514  | 94925727  | PPP1R9A   |
| ENSG00000158545 | 10.25147099 | 10.06692591 | protein_coding | 16 | 88636789  | 88698374  | ZC3H18    |
| ENSG00000158552 | 7.514527001 | 7.614575135 | protein_coding | 2  | 220059959 | 220074373 | ZFAND2B   |
| ENSG00000158553 | 1.407729925 | 0.697730409 | protein_coding | 6  | 27253682  | 27279949  | POM121L2  |
| ENSG00000158555 | 8.513842764 | 8.40394723  | protein_coding | 11 | 75145685  | 75236948  | GDPD5     |
| ENSG00000158560 | 0.499066092 | 0           | protein_coding | 7  | 95401866  | 95739634  | DYNC1I1   |
| ENSG00000158571 | 2.10647801  | 2.420525079 | protein_coding | X  | 54959394  | 55024967  | PFKFB1    |
| ENSG00000158578 | 0.869158192 | 0.950786998 | protein_coding | X  | 55035488  | 55057497  | ALAS2     |
| ENSG00000158604 | 9.995211901 | 9.536590702 | protein_coding | 7  | 44617493  | 44621886  | TMED4     |
| ENSG00000158615 | 9.722025379 | 9.162882465 | protein_coding | 1  | 204372515 | 204380945 | PPP1R15B  |
| ENSG00000158623 | 8.396654395 | 7.987679908 | protein_coding | 7  | 130146089 | 130353598 | COPG2     |
| ENSG00000158636 | 8.695964893 | 8.944426333 | protein_coding | 11 | 76155967  | 76264069  | C11orf30  |
| ENSG00000158669 | 9.684112495 | 9.657067809 | protein_coding | 8  | 41434706  | 41482520  | AGPAT6    |
| ENSG00000158683 | 0.499066092 | 2.039052734 | protein_coding | 7  | 47814250  | 47988088  | PKD1L1    |
| ENSG00000158691 | 6.204385613 | 6.799557986 | protein_coding | 6  | 28346732  | 28367511  | ZSCAN12   |
| ENSG00000158710 | 13.36541129 | 13.9992169  | protein_coding | 1  | 159887897 | 159895522 | TAGLN2    |
| ENSG00000158711 | 9.155101256 | 9.204541268 | protein_coding | 1  | 205566707 | 205601090 | ELK4      |
| ENSG00000158714 | 2.10647801  | 3.081239798 | protein_coding | 1  | 159796540 | 159807039 | SLAMF8    |
| ENSG00000158715 | 7.406211319 | 6.930376707 | protein_coding | 1  | 205626979 | 205649587 | SLC45A3   |
| ENSG00000158716 | 7.413224588 | 7.532142019 | protein_coding | 1  | 159750722 | 159752333 | DUSP23    |
| ENSG00000158717 | 8.02999382  | 7.931818465 | protein_coding | 16 | 88762903  | 88772829  | RNF166    |

|                 |             |             |                |    |           |           |          |
|-----------------|-------------|-------------|----------------|----|-----------|-----------|----------|
| ENSG00000158731 | 0.499066092 | 0           | pseudogene     | 1  | 159568088 | 159569017 | OR10J6P  |
| ENSG00000158747 | 9.24628631  | 9.248723012 | protein_coding | 1  | 19967048  | 19984945  | NBL1     |
| ENSG00000158764 | 0.499066092 | 0           | protein_coding | 1  | 160914815 | 160924589 | ITLN2    |
| ENSG00000158769 | 10.70447344 | 9.335308591 | protein_coding | 1  | 160965001 | 161008784 | F11R     |
| ENSG00000158773 | 9.042011838 | 9.566483319 | protein_coding | 1  | 161009041 | 161015767 | USF1     |
| ENSG00000158792 | 6.74439909  | 6.490875274 | protein_coding | 16 | 89762751  | 89768113  | SPATA2L  |
| ENSG00000158793 | 7.797842652 | 8.391976969 | protein_coding | 1  | 161087876 | 161095235 | NIT1     |
| ENSG00000158796 | 8.37885234  | 8.369091861 | protein_coding | 1  | 161090764 | 161102478 | DEDD     |
| ENSG00000158805 | 7.959880444 | 7.73528765  | protein_coding | 16 | 89786808  | 89807311  | ZNF276   |
| ENSG00000158806 | 2.471521042 | 0.697730409 | protein_coding | 8  | 21881636  | 21894408  | NPM2     |
| ENSG00000158813 | 4.734682531 | 3.32456471  | protein_coding | X  | 68835911  | 69259319  | EDA      |
| ENSG00000158815 | 0.499066092 | 1.16600992  | protein_coding | 8  | 21899909  | 21906320  | FGF17    |
| ENSG00000158825 | 9.204449373 | 8.439273392 | protein_coding | 1  | 20915441  | 20945401  | CDA      |
| ENSG00000158828 | 8.836938493 | 9.008548131 | protein_coding | 1  | 20959948  | 20978004  | PINK1    |
| ENSG00000158850 | 9.334821842 | 8.944426333 | protein_coding | 1  | 161141100 | 161147309 | B4GALT3  |
| ENSG00000158856 | 6.482942724 | 7.745776733 | protein_coding | 8  | 21906506  | 21940038  | EPB49    |
| ENSG00000158859 | 3.077135474 | 3.368666104 | protein_coding | 1  | 161159538 | 161168846 | ADAMTS4  |
| ENSG00000158863 | 9.086562954 | 9.011159004 | protein_coding | 8  | 21946670  | 21962232  | FAM160B2 |
| ENSG00000158864 | 10.74011984 | 11.04071149 | protein_coding | 1  | 161166894 | 161184185 | NDUFS2   |
| ENSG00000158865 | 3.698846687 | 2.652276565 | protein_coding | 16 | 24857162  | 24922949  | SLC5A11  |
| ENSG00000158869 | 2.35979773  | 1.802319292 | protein_coding | 1  | 161185024 | 161190489 | FCER1G   |
| ENSG00000158882 | 7.73205733  | 7.940975956 | protein_coding | 1  | 161195793 | 161200408 | TOMM40L  |
| ENSG00000158887 | 2.10647801  | 2.334191469 | protein_coding | 1  | 161274525 | 161279762 | MPZ      |
| ENSG00000158941 | 10.35161244 | 10.20939387 | protein_coding | 8  | 22462145  | 22479027  | KIAA1967 |
| ENSG00000158966 | 5.431503808 | 6.117167886 | protein_coding | 1  | 64936428  | 65158741  | CACHD1   |
| ENSG00000158985 | 8.791909364 | 8.673761454 | protein_coding | 5  | 130581186 | 130734140 | CDC42SE2 |
| ENSG00000158987 | 6.386460534 | 6.642271819 | protein_coding | 5  | 130759614 | 130970929 | RAPGEF6  |
| ENSG00000159023 | 8.494133947 | 8.377210474 | protein_coding | 1  | 29213603  | 29446553  | EPB41    |
| ENSG00000159055 | 7.981274537 | 8.071789292 | protein_coding | 21 | 33640530  | 33651380  | MIS18A   |
| ENSG00000159063 | 9.019209518 | 9.184633427 | protein_coding | 11 | 77811982  | 77850706  | ALG8     |
| ENSG00000159069 | 10.32070875 | 10.38238014 | protein_coding | 9  | 139834887 | 139839148 | FBXW5    |
| ENSG00000159079 | 8.541310587 | 8.855210283 | protein_coding | 21 | 33951132  | 33985176  | C21orf59 |
| ENSG00000159082 | 6.912209543 | 7.00911166  | protein_coding | 21 | 33997269  | 34100359  | SYNJ1    |
| ENSG00000159086 | 8.561968095 | 8.70742221  | protein_coding | 21 | 34106210  | 34144169  | GCFC1    |
| ENSG00000159110 | 7.119373418 | 7.679480043 | protein_coding | 21 | 34602206  | 34637969  | IFNAR2   |
| ENSG00000159111 | 8.655134734 | 8.541545191 | protein_coding | 17 | 45900638  | 45908900  | MRPL10   |
| ENSG00000159128 | 9.407740769 | 9.20301961  | protein_coding | 21 | 34757299  | 34851655  | IFNGR2   |
| ENSG00000159131 | 10.67158427 | 10.53531681 | protein_coding | 21 | 34870940  | 34915797  | GART     |
| ENSG00000159140 | 11.17708996 | 11.07480633 | protein_coding | 21 | 34914924  | 34949812  | SON      |
| ENSG00000159147 | 7.630400601 | 7.920752191 | protein_coding | 21 | 34947783  | 34961014  | DONSON   |
| ENSG00000159164 | 3.077135474 | 2.420525079 | protein_coding | 1  | 149874870 | 149889434 | SV2A     |
| ENSG00000159166 | 9.120167967 | 1.802319292 | protein_coding | 1  | 201342372 | 201368736 | LAD1     |
| ENSG00000159167 | 9.023798905 | 9.946603152 | protein_coding | 8  | 23699428  | 23712320  | STC1     |
| ENSG00000159173 | 0.869158192 | 0.390640832 | protein_coding | 1  | 201372896 | 201398994 | TNNI1    |
| ENSG00000159176 | 9.05999771  | 8.369091861 | protein_coding | 1  | 201452658 | 201478584 | CSRP1    |
| ENSG00000159197 | 0.499066092 | 1.667587519 | protein_coding | 21 | 35736323  | 35743440  | KCNE2    |
| ENSG00000159199 | 9.262881318 | 9.430057217 | protein_coding | 17 | 46970127  | 46973233  | ATP5G1   |
| ENSG00000159200 | 8.120617457 | 7.999999944 | protein_coding | 21 | 35885440  | 35987441  | RCAN1    |
| ENSG00000159202 | 10.03155637 | 10.15455566 | protein_coding | 17 | 46985731  | 47006418  | UBE2Z    |
| ENSG00000159208 | 6.220467583 | 6.365895578 | protein_coding | 1  | 150254953 | 150259505 | C1orf51  |
| ENSG00000159210 | 8.774313977 | 8.725553248 | protein_coding | 17 | 47006678  | 47022479  | SNF8     |
| ENSG00000159214 | 6.155035276 | 5.832272499 | protein_coding | 1  | 44457031  | 44462200  | CCDC24   |
| ENSG00000159216 | 9.740266097 | 9.452002561 | protein_coding | 21 | 36160098  | 37357047  | RUNX1    |
| ENSG00000159217 | 0.499066092 | 0.697730409 | protein_coding | 17 | 47074774  | 47133012  | IGF2BP1  |
| ENSG00000159224 | 0.499066092 | 0.697730409 | protein_coding | 17 | 47035916  | 47045958  | GIP      |
| ENSG00000159228 | 8.688758029 | 8.374509343 | protein_coding | 21 | 37442239  | 37445464  | CBR1     |
| ENSG00000159231 | 5.869093502 | 6.123616685 | protein_coding | 21 | 37507210  | 37518864  | CBR3     |
| ENSG00000159239 | 4.261916566 | 4.250702764 | protein_coding | 2  | 74641304  | 74648718  | C2orf81  |
| ENSG00000159247 | 4.568725997 | 2.039052734 | pseudogene     | 9  | 141044565 | 141071716 | TUBBP5   |
| ENSG00000159256 | 7.624369505 | 8.278081046 | protein_coding | 21 | 37692487  | 37758446  | MORC3    |
| ENSG00000159259 | 8.02999382  | 8.026050991 | protein_coding | 21 | 37757676  | 37789125  | CHAF1B   |
| ENSG00000159261 | 1.407729925 | 2.579085888 | protein_coding | 21 | 37832919  | 37948867  | CLDN14   |
| ENSG00000159263 | 1.407729925 | 1.353254395 | protein_coding | 21 | 38071433  | 38131815  | SIM2     |

|                 |             |             |                  |    |           |           |           |
|-----------------|-------------|-------------|------------------|----|-----------|-----------|-----------|
| ENSG00000159267 | 7.832262274 | 7.871792517 | protein_coding   | 21 | 38123493  | 38362536  | HLCS      |
| ENSG00000159289 | 1.16343121  | 0.950786998 | protein_coding   | 15 | 74362198  | 74374891  | GOLGA6A   |
| ENSG00000159307 | 0           | 0.390640832 | protein_coding   | 22 | 43599229  | 43739394  | SCUBE1    |
| ENSG00000159314 | 7.803191723 | 7.019522872 | protein_coding   | 17 | 43471275  | 43511787  | ARHGAP27  |
| ENSG00000159322 | 9.319971717 | 9.288725373 | protein_coding   | 15 | 73043710  | 73078187  | ADPGK     |
| ENSG00000159335 | 11.83564426 | 11.78974728 | protein_coding   | 12 | 6874682   | 6880118   | PTMS      |
| ENSG00000159337 | 2.35979773  | 2.039052734 | protein_coding   | 15 | 42359207  | 42386752  | PLA2G4D   |
| ENSG00000159339 | 3.603959378 | 1.16600992  | protein_coding   | 1  | 17634690  | 17690499  | PADI4     |
| ENSG00000159346 | 9.651121255 | 9.619917937 | protein_coding   | 1  | 202909951 | 202927700 | ADIPOR1   |
| ENSG00000159348 | 7.748787017 | 8.426290271 | protein_coding   | 1  | 202930997 | 202936408 | CYB5R1    |
| ENSG00000159352 | 10.56028737 | 10.93284934 | protein_coding   | 1  | 151227179 | 151239955 | PSMD4     |
| ENSG00000159363 | 8.81194861  | 8.296748314 | protein_coding   | 1  | 17312453  | 17338423  | ATP13A2   |
| ENSG00000159374 | 0.499066092 | 0.390640832 | protein_coding   | 2  | 74785010  | 74875465  | C2orf65   |
| ENSG00000159377 | 11.53691523 | 12.06717193 | protein_coding   | 1  | 151372010 | 151374420 | PSMB4     |
| ENSG00000159387 | 1.16343121  | 0.390640832 | protein_coding   | 16 | 55357672  | 55367395  | IRX6      |
| ENSG00000159388 | 5.967663407 | 5.96747225  | protein_coding   | 1  | 203274619 | 203278730 | BTG2      |
| ENSG00000159399 | 10.25293768 | 10.58464742 | protein_coding   | 2  | 75061108  | 75120486  | HK2       |
| ENSG00000159403 | 9.034071956 | 9.503595441 | protein_coding   | 12 | 7187513   | 7245203   | C1R       |
| ENSG00000159409 | 0.499066092 | 0.390640832 | protein_coding   | 1  | 151674880 | 151689290 | CELF3     |
| ENSG00000159423 | 7.04456449  | 7.758263791 | protein_coding   | 1  | 19197926  | 19229275  | ALDH4A1   |
| ENSG00000159433 | 7.106450572 | 7.32390599  | protein_coding   | 15 | 42867857  | 43013179  | STARD9    |
| ENSG00000159445 | 7.952677993 | 8.265014588 | protein_coding   | 1  | 151846060 | 151882284 | THEM4     |
| ENSG00000159450 | 3.911897206 | 3.453019579 | protein_coding   | 1  | 152078793 | 152086556 | TCHH      |
| ENSG00000159459 | 8.271030151 | 8.075120324 | protein_coding   | 15 | 43235095  | 43398311  | UBR1      |
| ENSG00000159461 | 9.791627126 | 10.17914289 | protein_coding   | 16 | 56395364  | 56459450  | AMFR      |
| ENSG00000159479 | 8.357195795 | 8.744505654 | protein_coding   | 1  | 43849588  | 43855479  | MED8      |
| ENSG00000159496 | 3.554067925 | 3.532712221 | protein_coding   | 22 | 24030323  | 24041363  | RGL4      |
| ENSG00000159556 | 0.869158192 | 0.390640832 | protein_coding   | 15 | 76629065  | 76634817  | ISL2      |
| ENSG00000159579 | 8.655134734 | 9.023280994 | protein_coding   | 16 | 57220049  | 57274387  | RSPRY1    |
| ENSG00000159588 | 3.652182994 | 4.021284656 | protein_coding   | 1  | 46085716  | 46089729  | CCDC17    |
| ENSG00000159592 | 9.900443107 | 9.793751926 | protein_coding   | 1  | 46092976  | 46153785  | GPBP1L1   |
| ENSG00000159593 | 9.684837132 | 10.21958906 | protein_coding   | 16 | 66836778  | 66907159  | NAE1      |
| ENSG00000159596 | 8.401952457 | 8.291030223 | protein_coding   | 1  | 46152886  | 46160115  | TMEM69    |
| ENSG00000159618 | 1.616589159 | 1.925536307 | protein_coding   | 16 | 57576333  | 57625593  | GPR114    |
| ENSG00000159625 | 0           | 1.802319292 | protein_coding   | 16 | 57728705  | 57765717  | CCDC135   |
| ENSG00000159640 | 5.141750194 | 3.781359661 | protein_coding   | 17 | 61554422  | 61599209  | ACE       |
| ENSG00000159648 | 3.335220907 | 3.781359661 | protein_coding   | 16 | 58010339  | 58022020  | TEPP      |
| ENSG00000159650 | 1.407729925 | 1.925536307 | protein_coding   | 3  | 126200124 | 126236616 | UROC1     |
| ENSG00000159658 | 9.724141885 | 9.399160615 | protein_coding   | 1  | 47124366  | 47184824  | KIAA0494  |
| ENSG00000159674 | 3.744048221 | 4.101879561 | protein_coding   | 4  | 1160720   | 1202750   | SPON2     |
| ENSG00000159685 | 7.437505974 | 7.885138265 | protein_coding   | 3  | 126423063 | 126679249 | CHCHD6    |
| ENSG00000159692 | 10.3341663  | 10.15100875 | protein_coding   | 4  | 1205236   | 1243741   | CTBP1     |
| ENSG00000159708 | 1.16343121  | 0.697730409 | protein_coding   | 16 | 67360701  | 67419106  | LRR36     |
| ENSG00000159712 | 2.238690726 | 2.579085888 | processed_transc | 9  | 99918175  | 99983538  | ANKRD18CP |
| ENSG00000159713 | 4.19837882  | 4.363974406 | protein_coding   | 16 | 67423712  | 67427438  | TPP3      |
| ENSG00000159714 | 6.733233509 | 7.083771121 | protein_coding   | 16 | 67428322  | 67450736  | ZDHC1     |
| ENSG00000159720 | 10.13433868 | 10.44519147 | protein_coding   | 16 | 67471917  | 67515140  | ATP6V0D1  |
| ENSG00000159723 | 0           | 0.390640832 | protein_coding   | 16 | 67516474  | 67517716  | AGRP      |
| ENSG00000159733 | 4.543379137 | 5.593003837 | protein_coding   | 4  | 2271309   | 2420390   | ZFYVE28   |
| ENSG00000159753 | 3.830412367 | 3.781359661 | protein_coding   | 16 | 67679030  | 67691456  | RLTPR     |
| ENSG00000159761 | 4.352265886 | 4.777836593 | protein_coding   | 16 | 67700719  | 67702660  | C16orf86  |
| ENSG00000159784 | 1.616589159 | 1.667587519 | protein_coding   | 7  | 143050493 | 143059863 | FAM131B   |
| ENSG00000159788 | 7.420203928 | 7.4317778   | protein_coding   | 4  | 3294755   | 3441640   | RGS12     |
| ENSG00000159792 | 9.012297947 | 8.987489278 | protein_coding   | 16 | 67927175  | 67963581  | PSKH1     |
| ENSG00000159840 | 11.68840814 | 11.37729315 | protein_coding   | 7  | 143078173 | 143088204 | ZYX       |
| ENSG00000159842 | 11.05067904 | 11.42865055 | protein_coding   | 17 | 906758    | 1090616   | ABR       |
| ENSG00000159860 | 0.499066092 | 0.390640832 | pseudogene       | 7  | 143333745 | 143515397 | FAM115D   |
| ENSG00000159871 | 5.286269488 | 3.027231696 | protein_coding   | 19 | 44300080  | 44324808  | LYPD5     |
| ENSG00000159873 | 9.233465948 | 9.61477711  | protein_coding   | 22 | 29168662  | 29185283  | CCDC117   |
| ENSG00000159882 | 5.967663407 | 6.252780742 | protein_coding   | 19 | 44507077  | 44518072  | ZNF230    |
| ENSG00000159884 | 4.062237333 | 5.187895122 | protein_coding   | 9  | 35658301  | 35661508  | CCDC107   |
| ENSG00000159885 | 5.91922012  | 5.776071827 | protein_coding   | 19 | 44529494  | 44537260  | ZNF222    |
| ENSG00000159899 | 5.550781289 | 3.570966319 | protein_coding   | 9  | 35792151  | 35809729  | NPR2      |

|                 |             |             |                |    |           |           |           |
|-----------------|-------------|-------------|----------------|----|-----------|-----------|-----------|
| ENSG00000159904 | 2.238690726 | 2.788380093 | pseudogene     | 7  | 5160870   | 5184177   | ZNF890P   |
| ENSG00000159905 | 5.958104008 | 5.886365696 | protein_coding | 19 | 44455380  | 44471752  | ZNF221    |
| ENSG00000159915 | 3.871730003 | 4.342020395 | protein_coding | 19 | 44754318  | 44815771  | ZNF233    |
| ENSG00000159917 | 5.316509574 | 5.294620694 | protein_coding | 19 | 44782947  | 44813601  | ZNF235    |
| ENSG00000159921 | 9.072234198 | 8.330588949 | protein_coding | 9  | 36214438  | 36277053  | GNE       |
| ENSG00000159958 | 3.146112541 | 2.579085888 | protein_coding | 22 | 42321045  | 42322822  | TNFRSF13C |
| ENSG00000160007 | 10.27716552 | 9.753257466 | protein_coding | 19 | 47421933  | 47508323  | ARHGAP35  |
| ENSG00000160013 | 1.16343121  | 0.697730409 | protein_coding | 19 | 47123726  | 47128354  | PTGIR     |
| ENSG00000160014 | 10.97478974 | 10.78609522 | protein_coding | 19 | 47104566  | 47114039  | CALM3     |
| ENSG00000160049 | 10.07033902 | 9.496780665 | protein_coding | 1  | 10516579  | 10532583  | DFFA      |
| ENSG00000160050 | 5.741167503 | 5.80042639  | protein_coding | 1  | 32665987  | 32670988  | CCDC28B   |
| ENSG00000160051 | 4.77879189  | 5.085909553 | protein_coding | 1  | 32671236  | 32674288  | IQCC      |
| ENSG00000160055 | 5.472368541 | 6.360445592 | protein_coding | 1  | 32680073  | 32687972  | TMEM234   |
| ENSG00000160058 | 8.879339004 | 9.242070261 | protein_coding | 1  | 32830704  | 32860332  | BSDC1     |
| ENSG00000160062 | 2.671945279 | 2.721932731 | protein_coding | 1  | 33005028  | 33066591  | ZBTB8A    |
| ENSG00000160072 | 8.772951555 | 8.811942385 | protein_coding | 1  | 1407143   | 1433228   | ATAD3B    |
| ENSG00000160075 | 10.06756346 | 10.0885135  | protein_coding | 1  | 1477053   | 1510249   | SSU72     |
| ENSG00000160087 | 8.949763328 | 8.900038352 | protein_coding | 1  | 1189289   | 1209265   | UBE2J2    |
| ENSG00000160094 | 6.733233509 | 6.270323763 | protein_coding | 1  | 33722146  | 33766320  | ZNF362    |
| ENSG00000160097 | 3.004694206 | 1.925536307 | protein_coding | 1  | 33327869  | 33338083  | FNDC5     |
| ENSG00000160111 | 3.830412367 | 3.32456471  | protein_coding | 19 | 17003758  | 17137625  | CPAMD8    |
| ENSG00000160113 | 10.07532163 | 9.887675661 | protein_coding | 19 | 17342694  | 17356151  | NR2F6     |
| ENSG00000160117 | 6.068837212 | 5.112089758 | protein_coding | 19 | 17392454  | 17398455  | ANKLE1    |
| ENSG00000160124 | 7.64536895  | 7.593823731 | protein_coding | 3  | 122078438 | 122102078 | CCDC58    |
| ENSG00000160131 | 8.904442656 | 9.057364358 | protein_coding | X  | 150564987 | 150577836 | VMA21     |
| ENSG00000160145 | 4.999881834 | 3.906303962 | protein_coding | 3  | 123798870 | 124440036 | KALRN     |
| ENSG00000160161 | 10.73907363 | 10.10978283 | protein_coding | 19 | 19649074  | 19657468  | CILP2     |
| ENSG00000160172 | 6.386460534 | 5.536128679 | pseudogene     | 11 | 67559119  | 67572807  | FAM86C2P  |
| ENSG00000160179 | 1.616589159 | 2.334191469 | protein_coding | 21 | 43619799  | 43720714  | ABCG1     |
| ENSG00000160181 | 0.499066092 | 0           | protein_coding | 21 | 43766466  | 43771237  | TFF2      |
| ENSG00000160182 | 2.928422289 | 2.652276565 | protein_coding | 21 | 43782391  | 43786703  | TFF1      |
| ENSG00000160183 | 8.109865782 | 8.027771115 | protein_coding | 21 | 38437942  | 43816955  | TMPRSS3   |
| ENSG00000160185 | 3.652182994 | 4.048652948 | protein_coding | 21 | 43824008  | 43867791  | UBASH3A   |
| ENSG00000160188 | 3.871730003 | 3.935919592 | protein_coding | 21 | 43892596  | 43916464  | RSPH1     |
| ENSG00000160190 | 7.31554162  | 6.677762549 | protein_coding | 21 | 43916128  | 44001550  | SLC37A1   |
| ENSG00000160191 | 5.018397273 | 2.039052734 | protein_coding | 21 | 44073746  | 44195619  | PDE9A     |
| ENSG00000160193 | 9.354994343 | 9.113519788 | protein_coding | 21 | 44263204  | 44299678  | WDR4      |
| ENSG00000160194 | 8.353554553 | 8.587754596 | protein_coding | 21 | 44299754  | 44329783  | NDUFV3    |
| ENSG00000160199 | 7.19863491  | 7.524852175 | protein_coding | 21 | 44394620  | 44454172  | PKNOX1    |
| ENSG00000160200 | 10.38677526 | 10.07776009 | protein_coding | 21 | 44473301  | 44497053  | CBS       |
| ENSG00000160201 | 9.858024966 | 9.917208266 | protein_coding | 21 | 44513066  | 44527697  | U2AF1     |
| ENSG00000160202 | 1.799000381 | 1.925536307 | protein_coding | 21 | 44589118  | 44592915  | CRYAA     |
| ENSG00000160207 | 4.097495944 | 5.004391715 | protein_coding | 21 | 44949072  | 45079374  | HSF2BP    |
| ENSG00000160208 | 10.08413733 | 10.02792279 | protein_coding | 21 | 45079429  | 45115958  | RRP1B     |
| ENSG00000160209 | 10.60882284 | 10.02103068 | protein_coding | 21 | 45138975  | 45194151  | PDXK      |
| ENSG00000160211 | 11.34236022 | 10.24384153 | protein_coding | X  | 153759606 | 153775787 | G6PD      |
| ENSG00000160213 | 7.89873181  | 7.784953917 | protein_coding | 21 | 45192393  | 45196326  | CSTB      |
| ENSG00000160214 | 9.036344956 | 8.941691738 | protein_coding | 21 | 45209394  | 45225174  | RRP1      |
| ENSG00000160216 | 9.611271904 | 9.511607983 | protein_coding | 21 | 45285067  | 45406417  | AGPAT3    |
| ENSG00000160218 | 9.212512411 | 9.272131838 | protein_coding | 21 | 45432200  | 45526433  | TRAPPC10  |
| ENSG00000160219 | 4.381167248 | 4.676215056 | protein_coding | X  | 153903529 | 153979858 | GAB3      |
| ENSG00000160221 | 8.195750939 | 8.844514354 | protein_coding | 21 | 45553487  | 45565605  | C21orf33  |
| ENSG00000160223 | 9.49130376  | 9.53114363  | protein_coding | 21 | 45642874  | 45660849  | ICOSLG    |
| ENSG00000160224 | 0.499066092 | 0.950786998 | protein_coding | 21 | 45705721  | 45718531  | AIRE      |
| ENSG00000160226 | 6.646617938 | 7.002128877 | protein_coding | 21 | 45748827  | 45759285  | C21orf2   |
| ENSG00000160229 | 4.6658819   | 4.65855978  | pseudogene     | 19 | 20959110  | 20991922  | ZNF66P    |
| ENSG00000160233 | 5.763291843 | 5.41517489  | protein_coding | 21 | 45875369  | 45878739  | LRRC3     |
| ENSG00000160255 | 7.72361917  | 6.59664425  | protein_coding | 21 | 46305868  | 46351904  | ITGB2     |
| ENSG00000160256 | 7.451199747 | 7.418726742 | protein_coding | 21 | 46359925  | 46396904  | FAM207A   |
| ENSG00000160271 | 9.145657575 | 9.197681135 | protein_coding | 9  | 135973107 | 136039301 | RALGDS    |
| ENSG00000160282 | 6.851544845 | 8.301022059 | protein_coding | 21 | 47556176  | 47575481  | FTCD      |
| ENSG00000160284 | 6.809636522 | 7.070480904 | protein_coding | 21 | 47581062  | 47604390  | C21orf56  |
| ENSG00000160285 | 10.44225492 | 10.14903446 | protein_coding | 21 | 47608360  | 47648738  | LSS       |

|                 |             |             |                  |    |           |           |            |
|-----------------|-------------|-------------|------------------|----|-----------|-----------|------------|
| ENSG00000160293 | 9.936790859 | 9.221925935 | protein_coding   | 9  | 136627016 | 136857726 | VAV2       |
| ENSG00000160294 | 9.941649609 | 9.762067953 | protein_coding   | 21 | 47655047  | 47706211  | MCM3AP     |
| ENSG00000160298 | 6.573375019 | 6.854868327 | protein_coding   | 21 | 47720095  | 47743789  | C21orf58   |
| ENSG00000160299 | 9.089849478 | 9.464757353 | protein_coding   | 21 | 47744036  | 47865682  | PCNT       |
| ENSG00000160305 | 8.999540089 | 8.89533508  | protein_coding   | 21 | 47878812  | 47989926  | DIP2A      |
| ENSG00000160310 | 8.848626402 | 9.403804382 | protein_coding   | 21 | 48055079  | 48085036  | PRMT2      |
| ENSG00000160318 | 2.35979773  | 2.788380093 | protein_coding   | 19 | 51870352  | 51872257  | CLDND2     |
| ENSG00000160321 | 2.847891871 | 3.608232228 | protein_coding   | 19 | 22148897  | 22193745  | ZNF208     |
| ENSG00000160323 | 7.37781226  | 7.823095289 | protein_coding   | 9  | 136279478 | 136324508 | ADAMTS13   |
| ENSG00000160325 | 6.313367288 | 6.480864016 | protein_coding   | 9  | 136325089 | 136335970 | C9orf7     |
| ENSG00000160326 | 10.6371792  | 10.80176251 | protein_coding   | 9  | 136336217 | 136344259 | SLC2A6     |
| ENSG00000160336 | 8.487504052 | 8.415818989 | processed_transc | 19 | 53935227  | 53961515  | ZNF761     |
| ENSG00000160345 | 5.695874189 | 6.192713747 | protein_coding   | 9  | 138387027 | 138393580 | C9orf116   |
| ENSG00000160352 | 6.956090577 | 6.889336956 | protein_coding   | 19 | 21264971  | 21301990  | ZNF714     |
| ENSG00000160360 | 9.205459721 | 9.046375341 | protein_coding   | 9  | 139221932 | 139254057 | GPSM1      |
| ENSG00000160392 | 6.35766608  | 6.3217081   | protein_coding   | 19 | 40826973  | 40854421  | C19orf47   |
| ENSG00000160396 | 0.869158192 | 1.667587519 | protein_coding   | 19 | 40885179  | 40896094  | HIPK4      |
| ENSG00000160401 | 5.718698586 | 5.871116342 | protein_coding   | 9  | 130469268 | 130478281 | C9orf117   |
| ENSG00000160404 | 7.751556534 | 7.749951106 | protein_coding   | 9  | 130493803 | 130497604 | TOR2A      |
| ENSG00000160408 | 8.64474405  | 8.500015927 | protein_coding   | 9  | 130647600 | 130667687 | ST6GALNAC6 |
| ENSG00000160410 | 9.319971717 | 8.867749534 | protein_coding   | 19 | 41082757  | 41097301  | SHKBP1     |
| ENSG00000160439 | 8.460675529 | 8.135396417 | protein_coding   | 19 | 55555711  | 55580914  | RDH13      |
| ENSG00000160445 | 9.477987143 | 9.461579211 | protein_coding   | 9  | 131492065 | 131534693 | ZER1       |
| ENSG00000160446 | 9.05552222  | 8.965221116 | protein_coding   | 9  | 131483148 | 131486406 | ZDHC12     |
| ENSG00000160447 | 7.873527714 | 7.747865429 | protein_coding   | 9  | 131464802 | 131483197 | PKN3       |
| ENSG00000160460 | 2.762599152 | 3.133298822 | protein_coding   | 19 | 40972148  | 41082365  | SPTBN4     |
| ENSG00000160469 | 5.806547963 | 6.419292172 | protein_coding   | 19 | 55795534  | 55823901  | BRSK1      |
| ENSG00000160471 | 5.255381949 | 2.334191469 | protein_coding   | 19 | 55861076  | 55866182  | COX6B2     |
| ENSG00000160472 | 3.78787645  | 2.721932731 | protein_coding   | 19 | 55888204  | 55889612  | TMEM190    |
| ENSG00000160539 | 0.499066092 | 0.697730409 | protein_coding   | 9  | 134165081 | 134184649 | PPAPDC3    |
| ENSG00000160551 | 7.757079669 | 7.556178852 | protein_coding   | 17 | 27717943  | 27871502  | TAOK1      |
| ENSG00000160563 | 7.488200893 | 7.475288518 | protein_coding   | 9  | 134735494 | 134955295 | MED27      |
| ENSG00000160570 | 7.110771062 | 7.026422172 | protein_coding   | 19 | 42702752  | 42721813  | DEDD2      |
| ENSG00000160584 | 8.741255403 | 8.717049372 | protein_coding   | 11 | 116714118 | 116969153 | SIK3       |
| ENSG00000160588 | 7.144876945 | 6.619638408 | protein_coding   | 11 | 118097409 | 118123065 | MPZL3      |
| ENSG00000160593 | 0.869158192 | 0           | protein_coding   | 11 | 118064455 | 118095809 | AMICA1     |
| ENSG00000160602 | 6.716321419 | 6.16171561  | protein_coding   | 17 | 27055822  | 27069784  | NEK8       |
| ENSG00000160606 | 7.348842929 | 7.903991977 | protein_coding   | 17 | 27051366  | 27053950  | TLCD1      |
| ENSG00000160613 | 9.318104658 | 9.705158168 | protein_coding   | 11 | 117075053 | 117103241 | PCSK7      |
| ENSG00000160633 | 10.64539243 | 10.51645069 | protein_coding   | 19 | 5623150   | 5668488   | SAFB       |
| ENSG00000160678 | 3.146112541 | 3.411459265 | protein_coding   | 1  | 153600402 | 153604513 | S100A1     |
| ENSG00000160679 | 9.743052004 | 9.904157241 | protein_coding   | 1  | 153606525 | 153618782 | CHTOP      |
| ENSG00000160685 | 9.283120944 | 9.131229537 | protein_coding   | 1  | 154975127 | 154990998 | ZBTB7B     |
| ENSG00000160688 | 9.369490093 | 9.697613846 | protein_coding   | 1  | 154955814 | 154965587 | FLAD1      |
| ENSG00000160691 | 11.29923875 | 11.48326581 | protein_coding   | 1  | 154934774 | 154946871 | SHC1       |
| ENSG00000160695 | 8.711694395 | 9.143974165 | processed_transc | 11 | 118938403 | 118952688 | VPS11      |
| ENSG00000160703 | 8.766120079 | 9.229419632 | protein_coding   | 11 | 119037277 | 119054725 | NLRX1      |
| ENSG00000160710 | 12.90029205 | 13.05982354 | protein_coding   | 1  | 154554538 | 154600475 | ADAR       |
| ENSG00000160712 | 7.049074049 | 6.690849666 | protein_coding   | 1  | 154377669 | 154441926 | IL6R       |
| ENSG00000160714 | 9.70212013  | 9.76979748  | protein_coding   | 1  | 154521053 | 154531504 | UBE2Q1     |
| ENSG00000160716 | 2.928422289 | 3.133298822 | protein_coding   | 1  | 154540257 | 154552502 | CHRN2      |
| ENSG00000160741 | 9.72977077  | 9.791728663 | protein_coding   | 1  | 153920145 | 153931101 | CRTC2      |
| ENSG00000160746 | 8.286389971 | 8.180940029 | protein_coding   | 3  | 43396351  | 43733086  | ANO10      |
| ENSG00000160752 | 9.588218042 | 9.554003775 | protein_coding   | 1  | 155278539 | 155290457 | FDPS       |
| ENSG00000160753 | 9.30119149  | 9.391832931 | protein_coding   | 1  | 155290687 | 155300905 | RUSC1      |
| ENSG00000160766 | 6.610461229 | 7.591499486 | pseudogene       | 1  | 155183616 | 155197214 | GBAP1      |
| ENSG00000160767 | 10.45505461 | 10.15573604 | protein_coding   | 1  | 155216996 | 155225274 | FAM189B    |
| ENSG00000160781 | 7.484876093 | 7.690381265 | protein_coding   | 1  | 156213206 | 156217881 | PAQR6      |
| ENSG00000160783 | 7.222786417 | 7.827052132 | protein_coding   | 1  | 156182784 | 156212874 | PMF1       |
| ENSG00000160785 | 9.40334477  | 9.226426823 | protein_coding   | 1  | 156163880 | 156182587 | SLC25A44   |
| ENSG00000160789 | 12.92519015 | 12.58554936 | protein_coding   | 1  | 156052364 | 156109880 | LMNA       |
| ENSG00000160796 | 9.426059074 | 9.253876247 | protein_coding   | 3  | 47021173  | 47051193  | NBEAL2     |
| ENSG00000160799 | 7.50471092  | 7.572769481 | protein_coding   | 3  | 46963216  | 47023500  | CCDC12     |

|                 |             |              |                  |    |           |           |          |
|-----------------|-------------|--------------|------------------|----|-----------|-----------|----------|
| ENSG00000160801 | 1.16343121  | 2.652276565  | protein_coding   | 3  | 46919236  | 46945287  | PTH1R    |
| ENSG00000160803 | 10.62477101 | 10.68752499  | protein_coding   | 1  | 156005092 | 156023585 | UBQLN4   |
| ENSG00000160813 | 6.84118134  | 6.637773454  | protein_coding   | 7  | 100032905 | 100034188 | PPP1R35  |
| ENSG00000160818 | 9.214521149 | 9.865723786  | protein_coding   | 1  | 156564279 | 156571288 | GPATCH4  |
| ENSG00000160828 | 5.525114348 | 5.66550919   | protein_coding   | 7  | 74112305  | 74306729  | STAG3L2  |
| ENSG00000160838 | 1.407729925 | 1.16600992   | protein_coding   | 1  | 156890442 | 156902886 | LRRC71   |
| ENSG00000160862 | 5.472368541 | 4.888000647  | protein_coding   | 7  | 99564343  | 99573780  | AZGP1    |
| ENSG00000160867 | 7.797842652 | 7.237355663  | protein_coding   | 5  | 176513887 | 176525145 | FGFR4    |
| ENSG00000160868 | 0           | 0.390640832  | protein_coding   | 7  | 99354604  | 99381888  | CYP3A4   |
| ENSG00000160870 | 0.499066092 | 0.390640832  | protein_coding   | 7  | 99293368  | 99332819  | CYP3A7   |
| ENSG00000160877 | 12.53235086 | 12.18120713  | protein_coding   | 19 | 13229109  | 13251955  | NACC1    |
| ENSG00000160886 | 5.909333162 | 6.637773454  | protein_coding   | 8  | 143781529 | 143786545 | LY6K     |
| ENSG00000160888 | 12.50152617 | 11.05068645  | protein_coding   | 19 | 13261282  | 13265716  | IER2     |
| ENSG00000160908 | 7.612231145 | 7.083771121  | protein_coding   | 7  | 99084142  | 99097947  | ZNF394   |
| ENSG00000160917 | 8.622223055 | 8.070120888  | protein_coding   | 7  | 99036545  | 99054994  | CPSF4    |
| ENSG00000160932 | 11.2048893  | 11.1476082   | protein_coding   | 8  | 144099399 | 144105249 | LY6E     |
| ENSG00000160948 | 8.54291017  | 8.999810935  | protein_coding   | 8  | 145649000 | 145653931 | VPS28    |
| ENSG00000160949 | 9.144604451 | 8.975061478  | protein_coding   | 8  | 145654165 | 145669827 | TONSL    |
| ENSG00000160951 | 3.603959378 | 2.912743273  | protein_coding   | 19 | 14583278  | 14586174  | PTGER1   |
| ENSG00000160953 | 8.935220147 | 9.292307546  | protein_coding   | 19 | 1285890   | 1378430   | MUM1     |
| ENSG00000160957 | 9.505319266 | 9.647030526  | processed_transc | 8  | 145736667 | 145743229 | RECQL4   |
| ENSG00000160959 | 7.850461307 | 7.76240224   | protein_coding   | 8  | 145743376 | 145750557 | LRRC14   |
| ENSG00000160961 | 6.535310252 | 7.284161038  | protein_coding   | 19 | 14800613  | 14844557  | ZNF333   |
| ENSG00000160963 | 2.10647801  | 1.353254395  | polymorphic_pse  | 7  | 101006101 | 101202304 | EMID2    |
| ENSG00000160972 | 7.967047117 | 8.363653959  | protein_coding   | 8  | 145703352 | 145727504 | PPP1R16A |
| ENSG00000160973 | 0.869158192 | 1.667587519  | protein_coding   | 8  | 145698795 | 145701718 | FOXH1    |
| ENSG00000160991 | 8.890689734 | 8.073455769  | protein_coding   | 7  | 102073553 | 102097268 | ORAI2    |
| ENSG00000160993 | 7.035502862 | 6.264499759  | protein_coding   | 7  | 102096685 | 102105323 | ALKBH4   |
| ENSG00000160999 | 6.704935538 | 5.9163892    | protein_coding   | 7  | 101928405 | 101962178 | SH2B2    |
| ENSG00000161010 | 7.575190993 | 7.733180651  | protein_coding   | 5  | 179261436 | 179289173 | C5orf45  |
| ENSG00000161011 | 11.04504617 | 11.29040167  | protein_coding   | 5  | 179233388 | 179265078 | SQSTM1   |
| ENSG00000161013 | 11.27946544 | 11.33658474  | protein_coding   | 5  | 179224597 | 179233952 | MGAT4B   |
| ENSG00000161016 | 13.61025698 | 13.64124012  | protein_coding   | 8  | 146015150 | 146017972 | RPL8     |
| ENSG00000161021 | 9.037480115 | 8.89533508   | protein_coding   | 5  | 179159851 | 179223512 | MAML1    |
| ENSG00000161031 | 0.499066092 | 0            | protein_coding   | 19 | 15579456  | 15590663  | PGLYRP2  |
| ENSG00000161036 | 8.825155121 | 8.395978102  | protein_coding   | 7  | 102105376 | 102113615 | LRWD1    |
| ENSG00000161040 | 7.423680977 | 7.675096386  | protein_coding   | 7  | 102453308 | 102715286 | FBXL13   |
| ENSG00000161048 | 7.049074049 | 6.889336956  | protein_coding   | 7  | 102740223 | 102790007 | NAPEPLD  |
| ENSG00000161057 | 10.40404042 | 10.25085438  | protein_coding   | 7  | 102984701 | 103009842 | PSMC2    |
| ENSG00000161082 | 4.543379137 | 3.411459265  | protein_coding   | 19 | 3224701   | 3297074   | CELF5    |
| ENSG00000161091 | 11.07105438 | 11.27961406  | protein_coding   | 19 | 3538263   | 3557571   | MFSD12   |
| ENSG00000161103 | 1.16343121  | 2.334191469  | processed_transc | 22 | 18837631  | 18848562  |          |
| ENSG00000161132 | 1.616589159 | 1.518964905  | pseudogene       | 22 | 20287283  | 20300739  |          |
| ENSG00000161133 | 0           | 0.6977730409 | protein_coding   | 22 | 20704868  | 20745048  | USP41    |
| ENSG00000161149 | 1.616589159 | 2.420525079  | pseudogene       | 22 | 21357184  | 21368581  |          |
| ENSG00000161179 | 9.472122247 | 9.55579319   | protein_coding   | 22 | 21982378  | 21984353  | YDJC     |
| ENSG00000161180 | 2.671945279 | 2.851901313  | protein_coding   | 22 | 21987007  | 21991616  | CCDC116  |
| ENSG00000161202 | 10.24116219 | 9.928301652  | protein_coding   | 3  | 183873176 | 183891398 | DVL3     |
| ENSG00000161203 | 12.37758747 | 12.33143922  | protein_coding   | 3  | 183892477 | 183901879 | AP2M1    |
| ENSG00000161204 | 9.500388149 | 9.397831074  | protein_coding   | 3  | 183903811 | 183911800 | ABCF3    |
| ENSG00000161217 | 9.394512382 | 8.988372895  | protein_coding   | 3  | 195941093 | 196014828 | PCYT1A   |
| ENSG00000161243 | 6.825495146 | 5.700439663  | protein_coding   | 19 | 39514665  | 39523198  | FBXO27   |
| ENSG00000161249 | 9.514316103 | 7.593823731  | protein_coding   | 19 | 35988122  | 36004560  | DMKN     |
| ENSG00000161265 | 5.91922012  | 6.633261019  | protein_coding   | 19 | 36233430  | 36236336  | U2AF1L4  |
| ENSG00000161267 | 4.821592551 | 7.644032061  | protein_coding   | 3  | 197236654 | 197300194 | BDH1     |
| ENSG00000161270 | 1.616589159 | 1.925536307  | protein_coding   | 19 | 36316283  | 36342895  | NPHS1    |
| ENSG00000161277 | 4.863159938 | 5.66550919   | protein_coding   | 19 | 36525887  | 36545664  | THAP8    |
| ENSG00000161281 | 2.35979773  | 2.652276565  | protein_coding   | 19 | 36641824  | 36643771  | COX7A1   |
| ENSG00000161298 | 5.967663407 | 5.98174124   | protein_coding   | 19 | 37095719  | 37119499  | ZNF382   |
| ENSG00000161326 | 8.150302734 | 7.962719647  | protein_coding   | 17 | 35849937  | 35873603  | DUSP14   |
| ENSG00000161328 | 6.393570237 | 6.382123086  | protein_coding   | 11 | 537527    | 554916    | LRRC56   |
| ENSG00000161381 | 3.652182994 | 3.183544561  | protein_coding   | 17 | 37219556  | 37309485  | PLXDC1   |
| ENSG00000161395 | 5.575999561 | 5.988823159  | protein_coding   | 17 | 37827376  | 37844310  | PGAP3    |



|                 |             |             |                |    |          |                   |
|-----------------|-------------|-------------|----------------|----|----------|-------------------|
| ENSG00000161405 | 6.835971536 | 6.57327766  | protein_coding | 17 | 37913968 | 38020441 IKZF3    |
| ENSG00000161509 | 3.830412367 | 2.242360793 | protein_coding | 17 | 72838162 | 72856966 GRIN2C   |
| ENSG00000161513 | 7.399163791 | 7.426571535 | protein_coding | 17 | 72858620 | 72869156 FXDR     |
| ENSG00000161526 | 8.947349623 | 9.233897238 | protein_coding | 17 | 73663399 | 73704139 SAP30BP  |
| ENSG00000161533 | 8.690202285 | 8.703122764 | protein_coding | 17 | 73937596 | 73975515 ACOX1    |
| ENSG00000161542 | 7.96466218  | 8.088368066 | protein_coding | 17 | 74307014 | 74380602 PRPSAP1  |
| ENSG00000161544 | 3.830412367 | 2.579085888 | protein_coding | 17 | 74523440 | 74533782 CYGB     |
| ENSG00000161547 | 11.18505085 | 11.39788976 | protein_coding | 17 | 74730201 | 74733493 SRSF2    |
| ENSG00000161551 | 7.15746161  | 7.964516916 | protein_coding | 19 | 52359055 | 52394203 ZNF577   |
| ENSG00000161558 | 6.548110424 | 7.148445524 | protein_coding | 19 | 48835613 | 48867197 TMEM143  |
| ENSG00000161570 | 7.149084042 | 6.750400563 | protein_coding | 17 | 34198495 | 34207797 CCL5     |
| ENSG00000161572 | 0.499066092 | 0.390640832 | protein_coding | 17 | 34261548 | 34270674 LYZL6    |
| ENSG00000161594 | 0           | 1.16600992  | protein_coding | 17 | 39991937 | 40004636 KLHL10   |
| ENSG00000161609 | 4.962122459 | 5.42565083  | protein_coding | 19 | 49891475 | 49921256 CCDC155  |
| ENSG00000161610 | 0           | 0.697730409 | protein_coding | 17 | 40336078 | 40337470 HCRT     |
| ENSG00000161618 | 8.826469148 | 9.663720744 | protein_coding | 19 | 49956473 | 49974304 ALDH16A1 |
| ENSG00000161638 | 12.39695366 | 13.11603677 | protein_coding | 12 | 54789045 | 54813244 ITGA5    |
| ENSG00000161640 | 0           | 0.390640832 | protein_coding | 19 | 50412758 | 50464429 SIGLEC11 |
| ENSG00000161642 | 9.979350975 | 9.398495997 | protein_coding | 12 | 54762917 | 54785082 ZNF385A  |
| ENSG00000161643 | 0.869158192 | 0.697730409 | protein_coding | 19 | 50472857 | 50478191 SIGLEC16 |
| ENSG00000161647 | 6.670228606 | 6.376734172 | protein_coding | 17 | 41878167 | 41910538 MPP3     |
| ENSG00000161649 | 0           | 0.390640832 | protein_coding | 17 | 41924516 | 41940994 CD300LG  |
| ENSG00000161653 | 6.567100227 | 5.456629825 | protein_coding | 17 | 42082031 | 42086433 NAGS     |
| ENSG00000161654 | 9.16240384  | 8.657187659 | protein_coding | 17 | 42112004 | 42144103 LSM12    |
| ENSG00000161664 | 5.018397273 | 4.903073497 | protein_coding | 17 | 42248074 | 42256451 ASB16    |
| ENSG00000161671 | 8.74542939  | 9.261937181 | protein_coding | 19 | 50979736 | 50986607 C19orf63 |
| ENSG00000161677 | 7.296703257 | 7.900240894 | protein_coding | 19 | 51009255 | 51014435 JOSD2    |
| ENSG00000161681 | 4.642199401 | 5.700439663 | protein_coding | 19 | 51165084 | 51222770 SHANK1   |
| ENSG00000161682 | 6.414691513 | 5.960284481 | protein_coding | 17 | 42430585 | 42441243 FAM171A2 |
| ENSG00000161692 | 8.303476525 | 8.343077302 | protein_coding | 17 | 42785976 | 42829632 DBF4B    |
| ENSG00000161714 | 8.888175056 | 8.419754632 | protein_coding | 17 | 43186335 | 43210580 PLCD3    |
| ENSG00000161791 | 9.012297947 | 9.705695541 | protein_coding | 12 | 50031724 | 50101948 FMNL3    |
| ENSG00000161800 | 10.33555133 | 10.43128732 | protein_coding | 12 | 50370706 | 50426919 RACGAP1  |
| ENSG00000161813 | 10.1252916  | 10.00452874 | protein_coding | 12 | 50786166 | 50873787 LARP4    |
| ENSG00000161835 | 3.393122761 | 3.493416095 | protein_coding | 12 | 52400724 | 52409673 GRASP    |
| ENSG00000161847 | 11.93675152 | 11.91143761 | protein_coding | 19 | 10426895 | 10444314 RAVER1   |
| ENSG00000161860 | 6.733233509 | 7.883239271 | protein_coding | 19 | 13009600 | 13030076 SYCE2    |
| ENSG00000161888 | 8.316627558 | 8.390640789 | protein_coding | 19 | 11257444 | 11266484 SPC24    |
| ENSG00000161896 | 4.618121645 | 5.187895122 | protein_coding | 6  | 33689444 | 33714762 IP6K3    |
| ENSG00000161904 | 8.997208309 | 9.048071417 | protein_coding | 6  | 33738979 | 33756913 LEMD2    |
| ENSG00000161905 | 1.16343121  | 2.039052734 | protein_coding | 17 | 4534214  | 4545589 ALOX15    |
| ENSG00000161912 | 5.91922012  | 7.51752531  | pseudogene     | 6  | 41068761 | 41108571          |
| ENSG00000161914 | 7.169937448 | 7.359856617 | protein_coding | 19 | 11594245 | 11616738 ZNF653   |
| ENSG00000161920 | 7.01259661  | 7.850567963 | protein_coding | 17 | 4634723  | 4636888 MED11     |
| ENSG00000161921 | 6.220467583 | 5.700439663 | protein_coding | 17 | 4636828  | 4643223 CXCL16    |
| ENSG00000161929 | 1.616589159 | 2.788380093 | protein_coding | 17 | 5113705  | 5138137 SCIMP     |
| ENSG00000161939 | 0.499066092 | 0           | protein_coding | 17 | 6915954  | 6920839 C17orf49  |
| ENSG00000161940 | 6.068837212 | 6.677762549 | protein_coding | 17 | 6926369  | 6933219 BCL6B     |
| ENSG00000161955 | 4.962122459 | 6.030599799 | protein_coding | 17 | 7461609  | 7464925 TNFSF13   |
| ENSG00000161956 | 10.37918427 | 10.87358473 | protein_coding | 17 | 7465272  | 7475287 SENP3     |
| ENSG00000161958 | 7.68357507  | 9.543220426 | protein_coding | 17 | 7342689  | 7348256 FGF11     |
| ENSG00000161960 | 13.53157464 | 13.86023647 | protein_coding | 17 | 7476024  | 7482324 EIF4A1    |
| ENSG00000161970 | 12.12872304 | 13.15497334 | protein_coding | 17 | 8280838  | 8286568 RPL26     |
| ENSG00000161980 | 7.952677993 | 8.112884393 | protein_coding | 16 | 96407    | 103628 POLR3K     |
| ENSG00000161981 | 8.526833966 | 8.904726341 | protein_coding | 16 | 103010   | 107669 SNRNP25    |
| ENSG00000161992 | 0.869158192 | 1.518964905 | protein_coding | 16 | 610422   | 615528 C16orf11   |
| ENSG00000161996 | 10.13539932 | 10.42117962 | protein_coding | 16 | 699311   | 717833 WDR90      |
| ENSG00000161999 | 8.066039442 | 8.190185975 | protein_coding | 16 | 731671   | 734529 JMJD8      |
| ENSG00000162004 | 6.670228606 | 6.293387477 | protein_coding | 16 | 772582   | 776954 CCDC78     |
| ENSG00000162006 | 0.869158192 | 0           | protein_coding | 16 | 819428   | 833370 MSLNL      |
| ENSG00000162009 | 1.616589159 | 0.390640832 | protein_coding | 16 | 1122756  | 1131454 SSTR5     |
| ENSG00000162032 | 1.407729925 | 1.802319292 | protein_coding | 16 | 1826713  | 1832821 SPSB3     |
| ENSG00000162039 | 7.813830732 | 8.488819803 | protein_coding | 16 | 1883984  | 1934295 C16orf73  |

|                 |             |             |                  |    |          |          |          |
|-----------------|-------------|-------------|------------------|----|----------|----------|----------|
| ENSG00000162062 | 7.717966186 | 8.012215662 | protein_coding   | 16 | 2510081  | 2514964  | C16orf59 |
| ENSG00000162063 | 9.642940664 | 9.287290009 | protein_coding   | 16 | 2479395  | 2508855  | CCNF     |
| ENSG00000162065 | 8.340737341 | 8.410554709 | protein_coding   | 16 | 2525147  | 2555735  | TBC1D24  |
| ENSG00000162066 | 7.22677265  | 7.598461017 | protein_coding   | 16 | 2570358  | 2581423  | AMDHD2   |
| ENSG00000162068 | 1.799000381 | 2.721932731 | protein_coding   | 16 | 2521500  | 2524146  | NTN3     |
| ENSG00000162069 | 2.762599152 | 0.697730409 | protein_coding   | 16 | 3077868  | 3085542  | CCDC64B  |
| ENSG00000162073 | 8.734271811 | 7.939149102 | protein_coding   | 16 | 3019246  | 3023490  | PAQR4    |
| ENSG00000162076 | 7.955082807 | 8.053329862 | protein_coding   | 16 | 2933187  | 2949383  | FLYWCH2  |
| ENSG00000162078 | 2.847891871 | 3.027231696 | protein_coding   | 16 | 2880170  | 2882285  | ZG16B    |
| ENSG00000162086 | 7.850461307 | 8.076782959 | protein_coding   | 16 | 3355486  | 3368574  | ZNF75A   |
| ENSG00000162104 | 9.38473389  | 9.104582717 | protein_coding   | 16 | 4012657  | 4166186  | ADCY9    |
| ENSG00000162105 | 5.563445526 | 1.802319292 | protein_coding   | 11 | 70313961 | 70963623 | SHANK2   |
| ENSG00000162129 | 9.356814297 | 9.337390687 | protein_coding   | 11 | 72003469 | 72145692 | CLPB     |
| ENSG00000162139 | 7.049074049 | 7.012590419 | protein_coding   | 11 | 74699179 | 74729938 | NEU3     |
| ENSG00000162144 | 8.893200037 | 9.155820862 | protein_coding   | 11 | 61116226 | 61129771 | CYBASC3  |
| ENSG00000162148 | 3.830412367 | 3.993387124 | protein_coding   | 11 | 61248592 | 61258403 | PPP1R32  |
| ENSG00000162174 | 6.220467583 | 6.831423059 | protein_coding   | 11 | 62104920 | 62160882 | ASRGL1   |
| ENSG00000162188 | 0           | 0.950786998 | protein_coding   | 11 | 62475130 | 62476673 | GNG3     |
| ENSG00000162191 | 9.874634141 | 10.12432619 | protein_coding   | 11 | 62443970 | 62446567 | UBXN1    |
| ENSG00000162194 | 8.46911316  | 8.794871435 | protein_coding   | 11 | 62430287 | 62439727 | C11orf48 |
| ENSG00000162222 | 7.633406721 | 7.844724842 | protein_coding   | 11 | 62495541 | 62507756 | TTC9C    |
| ENSG00000162227 | 8.066039442 | 8.458531597 | protein_coding   | 11 | 62538775 | 62554814 | TAF6L    |
| ENSG00000162231 | 9.142495894 | 9.474880612 | protein_coding   | 11 | 62559598 | 62573774 | NXF1     |
| ENSG00000162236 | 8.955779984 | 9.258278703 | protein_coding   | 11 | 62574369 | 62599560 | STX5     |
| ENSG00000162241 | 6.26766507  | 6.510691757 | protein_coding   | 11 | 65142663 | 65151172 | SLC25A45 |
| ENSG00000162244 | 11.2393334  | 11.63443472 | protein_coding   | 3  | 52027644 | 52029958 | RPL29    |
| ENSG00000162267 | 0           | 0.390640832 | protein_coding   | 3  | 52828784 | 52843025 | ITIH3    |
| ENSG00000162290 | 8.072698871 | 7.887034762 | processed_transc | 3  | 53317448 | 53381637 | DCP1A    |
| ENSG00000162298 | 9.528110879 | 9.798797703 | protein_coding   | 11 | 64889252 | 64902004 | SVVN1    |
| ENSG00000162300 | 5.827699195 | 6.35497494  | protein_coding   | 11 | 64851695 | 64855870 | ZFPL1    |
| ENSG00000162302 | 10.32024245 | 9.684042928 | protein_coding   | 11 | 64126620 | 64139687 | RPS6KA4  |
| ENSG00000162337 | 11.28353752 | 10.86735403 | protein_coding   | 11 | 68080077 | 68216743 | LRP5     |
| ENSG00000162341 | 7.837485466 | 7.860254213 | protein_coding   | 11 | 68816350 | 68858072 | TPCN2    |
| ENSG00000162344 | 2.10647801  | 2.242360793 | protein_coding   | 11 | 69513000 | 69519410 | FGF19    |
| ENSG00000162365 | 0.499066092 | 0.697730409 | protein_coding   | 1  | 47603107 | 47615413 | CYP4A22  |
| ENSG00000162366 | 7.35977471  | 7.909600377 | protein_coding   | 1  | 47649265 | 47656716 | PDZK1IP1 |
| ENSG00000162367 | 3.211941663 | 0           | protein_coding   | 1  | 47681963 | 47697892 | TAL1     |
| ENSG00000162368 | 10.13539932 | 10.40307044 | protein_coding   | 1  | 47799469 | 47844511 | CMPK1    |
| ENSG00000162377 | 7.873527714 | 7.905863867 | protein_coding   | 1  | 53152508 | 53164038 | SELRC1   |
| ENSG00000162378 | 8.322227223 | 8.525807191 | protein_coding   | 1  | 53192126 | 53293014 | ZYG11B   |
| ENSG00000162384 | 7.304268146 | 7.926295939 | protein_coding   | 1  | 53679771 | 53686289 | C1orf123 |
| ENSG00000162385 | 7.612231145 | 8.055017786 | protein_coding   | 1  | 53692564 | 53704282 | MAGOH    |
| ENSG00000162390 | 4.734682531 | 3.232099092 | protein_coding   | 1  | 55007930 | 55104865 | ACOT11   |
| ENSG00000162391 | 2.10647801  | 0.390640832 | protein_coding   | 1  | 55074855 | 55089229 | FAM151A  |
| ENSG00000162396 | 6.220467583 | 6.419292172 | protein_coding   | 1  | 55222571 | 55230187 | PARS2    |
| ENSG00000162398 | 1.799000381 | 0           | protein_coding   | 1  | 55271736 | 55307925 | C1orf177 |
| ENSG00000162402 | 9.769253212 | 9.67638708  | protein_coding   | 1  | 55532032 | 55681039 | USP24    |
| ENSG00000162407 | 8.677151638 | 8.119352325 | protein_coding   | 1  | 56960419 | 57110974 | PPAP2B   |
| ENSG00000162408 | 8.738466022 | 8.487570409 | protein_coding   | 1  | 6581407  | 6614595  | NOL9     |
| ENSG00000162413 | 9.306851272 | 9.420268302 | protein_coding   | 1  | 6650784  | 6674667  | KLHL21   |
| ENSG00000162415 | 3.146112541 | 4.17820932  | protein_coding   | 1  | 45482071 | 45771881 | ZSWIM5   |
| ENSG00000162419 | 7.82964357  | 7.778838337 | protein_coding   | 1  | 28995244 | 29045865 | GMEB1    |
| ENSG00000162426 | 4.097495944 | 2.971122874 | protein_coding   | 1  | 8377886  | 8404227  | SLC45A1  |
| ENSG00000162430 | 10.35298082 | 10.48423953 | protein_coding   | 1  | 26126667 | 26144713 | SEPN1    |
| ENSG00000162433 | 10.50883489 | 10.49329404 | protein_coding   | 1  | 65613232 | 65697828 | AK4      |
| ENSG00000162434 | 10.74046841 | 10.7118033  | protein_coding   | 1  | 65298912 | 65432187 | JAK1     |
| ENSG00000162437 | 7.420203928 | 7.225413142 | protein_coding   | 1  | 65210778 | 65298915 | RAVER2   |
| ENSG00000162438 | 1.616589159 | 0.390640832 | protein_coding   | 1  | 15764935 | 15775737 | CTRC     |
| ENSG00000162441 | 7.37062428  | 7.402908012 | protein_coding   | 1  | 9982171  | 10003465 | LZIC     |
| ENSG00000162444 | 1.16343121  | 0.950786998 | protein_coding   | 1  | 10057264 | 10076078 | RBP7     |
| ENSG00000162458 | 8.371669553 | 6.668971382 | protein_coding   | 1  | 16083102 | 16113089 | FBLIM1   |
| ENSG00000162461 | 3.274897671 | 3.133298822 | protein_coding   | 1  | 16062900 | 16067891 | SLC25A34 |
| ENSG00000162482 | 4.261916566 | 4.448594745 | protein_coding   | 1  | 19609052 | 19615744 | AKR7A3   |

|                 |             |             |                |   |           |           |          |
|-----------------|-------------|-------------|----------------|---|-----------|-----------|----------|
| ENSG00000162490 | 1.16343121  | 2.788380093 | protein_coding | 1 | 11751786  | 11785914  | C1orf187 |
| ENSG00000162496 | 7.169937448 | 6.097646709 | protein_coding | 1 | 12627939  | 12677737  | DHRS3    |
| ENSG00000162510 | 2.10647801  | 2.420525079 | protein_coding | 1 | 31184124  | 31196434  | MATN1    |
| ENSG00000162511 | 5.785082014 | 3.368666104 | protein_coding | 1 | 31205316  | 31230667  | LAPTM5   |
| ENSG00000162512 | 10.30806544 | 9.974965329 | protein_coding | 1 | 31342314  | 31381608  | SDC3     |
| ENSG00000162517 | 9.211506993 | 9.322752514 | protein_coding | 1 | 32095463  | 32110497  | PEF1     |
| ENSG00000162520 | 6.032862302 | 5.832272499 | protein_coding | 1 | 33145507  | 33169197  | SYNC     |
| ENSG00000162521 | 8.883132512 | 8.76630664  | protein_coding | 1 | 33116743  | 33146258  | RBBP4    |
| ENSG00000162522 | 10.81517599 | 9.517741338 | protein_coding | 1 | 33207486  | 33240571  | KIAA1522 |
| ENSG00000162526 | 0           | 0.390640832 | protein_coding | 1 | 32827798  | 32829913  | TSSK3    |
| ENSG00000162542 | 7.262161623 | 6.959507185 | protein_coding | 1 | 20008706  | 20126438  | TMCO4    |
| ENSG00000162543 | 5.316509574 | 4.17820932  | protein_coding | 1 | 20512578  | 20522541  | UBXN10   |
| ENSG00000162545 | 7.214780754 | 6.930376707 | protein_coding | 1 | 20808884  | 20812713  | CAMK2N1  |
| ENSG00000162551 | 1.799000381 | 1.667587519 | protein_coding | 1 | 21835858  | 21904905  | ALPL     |
| ENSG00000162552 | 5.158541613 | 5.32851069  | protein_coding | 1 | 22446461  | 22470462  | WNT4     |
| ENSG00000162571 | 1.616589159 | 0           | protein_coding | 1 | 1109264   | 1133315   | TLL10    |
| ENSG00000162572 | 5.995967334 | 6.450406542 | protein_coding | 1 | 1214447   | 1227409   | SCNN1D   |
| ENSG00000162576 | 5.858855738 | 6.349483465 | protein_coding | 1 | 1288069   | 1297157   | MXRA8    |
| ENSG00000162585 | 8.227927477 | 8.38394126  | protein_coding | 1 | 2115903   | 2144159   | C1orf86  |
| ENSG00000162591 | 9.385625588 | 10.22184491 | protein_coding | 1 | 3406484   | 3528059   | MEGF6    |
| ENSG00000162592 | 0.869158192 | 0           | protein_coding | 1 | 3668962   | 3688208   | CCDC27   |
| ENSG00000162595 | 0.869158192 | 0.697730409 | protein_coding | 1 | 68511645  | 68517314  | DIRAS3   |
| ENSG00000162599 | 7.720795447 | 6.45552765  | protein_coding | 1 | 61330931  | 61928465  | NFIA     |
| ENSG00000162600 | 6.129712275 | 6.771086752 | protein_coding | 1 | 58881056  | 59012474  | OMA1     |
| ENSG00000162601 | 8.259402007 | 8.560682282 | protein_coding | 1 | 59120411  | 59165764  | MYSM1    |
| ENSG00000162604 | 6.0776925   | 6.387491945 | protein_coding | 1 | 62146717  | 62191095  | TM2D1    |
| ENSG00000162607 | 9.360447332 | 9.587045627 | protein_coding | 1 | 62901968  | 62917475  | USP1     |
| ENSG00000162613 | 9.559268022 | 9.09886653  | protein_coding | 1 | 78409740  | 78444794  | FUBP1    |
| ENSG00000162614 | 6.17992145  | 7.167295693 | protein_coding | 1 | 78354198  | 78409580  | NEXN     |
| ENSG00000162616 | 7.23866569  | 7.992972811 | protein_coding | 1 | 78444859  | 78483648  | DNAJB4   |
| ENSG00000162620 | 3.077135474 | 4.021284656 | protein_coding | 1 | 74491699  | 74663871  | LRR1Q3   |
| ENSG00000162623 | 7.517784241 | 7.556178852 | protein_coding | 1 | 75198836  | 75232362  | TYW3     |
| ENSG00000162627 | 7.454602977 | 7.83885796  | protein_coding | 1 | 99127236  | 99226056  | SNX7     |
| ENSG00000162630 | 0           | 1.353254395 | protein_coding | 1 | 193148175 | 193155784 | B3GALT2  |
| ENSG00000162636 | 5.83815965  | 6.587342979 | protein_coding | 1 | 109102711 | 109187522 | FAM102B  |
| ENSG00000162639 | 5.741167503 | 5.6022688   | protein_coding | 1 | 109190912 | 109204148 | HENMT1   |
| ENSG00000162641 | 2.35979773  | 3.027231696 | protein_coding | 1 | 109358520 | 109506106 | AKNAD1   |
| ENSG00000162642 | 6.861834435 | 6.952279523 | protein_coding | 1 | 85715639  | 85725355  | C1orf52  |
| ENSG00000162643 | 0.499066092 | 0.390640832 | protein_coding | 1 | 85464830  | 85598821  | WDR63    |
| ENSG00000162645 | 8.759256101 | 9.728615271 | protein_coding | 1 | 89571815  | 89616139  | GBP2     |
| ENSG00000162650 | 6.386460534 | 7.022976646 | protein_coding | 1 | 110026101 | 110035426 | ATXN7L2  |
| ENSG00000162654 | 6.196276899 | 6.1803943   | protein_coding | 1 | 89646831  | 89664615  | GBP4     |
| ENSG00000162664 | 7.955082807 | 8.534302826 | protein_coding | 1 | 90457722  | 90494097  | ZNF326   |
| ENSG00000162676 | 1.407729925 | 2.721932731 | protein_coding | 1 | 92940319  | 92952433  | GF11     |
| ENSG00000162687 | 0           | 0.390640832 | protein_coding | 1 | 196194909 | 196577541 | KCNT2    |
| ENSG00000162688 | 8.004679484 | 8.316585024 | protein_coding | 1 | 100315640 | 100389579 | AGL      |
| ENSG00000162692 | 2.471521042 | 0.697730409 | protein_coding | 1 | 101185305 | 101204601 | VCAM1    |
| ENSG00000162694 | 7.234712227 | 7.996490656 | protein_coding | 1 | 101337943 | 101361554 | EXTL2    |
| ENSG00000162695 | 8.597806729 | 8.612036819 | protein_coding | 1 | 101361632 | 101447309 | SLC30A7  |
| ENSG00000162702 | 8.312882337 | 8.330588949 | protein_coding | 1 | 200375827 | 200379184 | ZNF281   |
| ENSG00000162704 | 9.732576998 | 10.37361447 | protein_coding | 1 | 183592401 | 183604892 | ARPC5    |
| ENSG00000162706 | 0.499066092 | 0           | protein_coding | 1 | 159141399 | 159173103 | CADM3    |
| ENSG00000162711 | 0.869158192 | 0.697730409 | protein_coding | 1 | 247579458 | 247612410 | NLRP3    |
| ENSG00000162714 | 8.369868254 | 8.512355001 | protein_coding | 1 | 247460714 | 247495148 | ZNF496   |
| ENSG00000162722 | 0           | 0.390640832 | protein_coding | 1 | 248020501 | 248041507 | TRIM58   |
| ENSG00000162723 | 1.16343121  | 0.390640832 | protein_coding | 1 | 159921282 | 159924044 | SLAMF9   |
| ENSG00000162728 | 0.869158192 | 0.390640832 | protein_coding | 1 | 160051360 | 160060353 | KCNJ9    |
| ENSG00000162729 | 8.916832554 | 8.614328238 | protein_coding | 1 | 160061130 | 160068733 | IGSF8    |
| ENSG00000162733 | 3.211941663 | 3.133298822 | protein_coding | 1 | 162601163 | 162750237 | DDR2     |
| ENSG00000162734 | 11.27586285 | 11.84201006 | protein_coding | 1 | 160175127 | 160185166 | PEA15    |
| ENSG00000162735 | 9.154055005 | 9.302290571 | protein_coding | 1 | 160246602 | 160256138 | PEX19    |
| ENSG00000162736 | 10.54998355 | 11.03173896 | protein_coding | 1 | 160313062 | 160328742 | NCSTN    |
| ENSG00000162738 | 2.10647801  | 1.16600992  | protein_coding | 1 | 160370376 | 160398468 | VANGL2   |

|                 |             |             |                |   |           |           |          |
|-----------------|-------------|-------------|----------------|---|-----------|-----------|----------|
| ENSG00000162745 | 5.472368541 | 4.17820932  | protein_coding | 1 | 161952982 | 161993644 | OLFML2B  |
| ENSG00000162746 | 2.928422289 | 2.420525079 | protein_coding | 1 | 161691353 | 161697933 | FCRLB    |
| ENSG00000162753 | 0.499066092 | 0           | protein_coding | 1 | 173469603 | 173572233 | SLC9A11  |
| ENSG00000162755 | 4.026095388 | 4.622587519 | protein_coding | 1 | 161068151 | 161070136 | KLHDC9   |
| ENSG00000162757 | 5.637181576 | 5.611474642 | protein_coding | 1 | 209955661 | 209957904 | C1orf74  |
| ENSG00000162769 | 7.759833327 | 7.907733332 | protein_coding | 1 | 213031597 | 213072705 | FLVCR1   |
| ENSG00000162772 | 9.989357796 | 8.166959047 | protein_coding | 1 | 212738676 | 212794119 | ATF3     |
| ENSG00000162775 | 7.811178326 | 7.444711851 | protein_coding | 1 | 110881128 | 110889299 | RBM15    |
| ENSG00000162777 | 5.60078458  | 4.7279204   | protein_coding | 1 | 111729796 | 111747157 | DENND2D  |
| ENSG00000162779 | 0.499066092 | 0.950786998 | protein_coding | 1 | 179334855 | 179523870 | AXDND1   |
| ENSG00000162783 | 9.531337629 | 9.274307066 | protein_coding | 1 | 181057638 | 181059977 | IER5     |
| ENSG00000162804 | 4.999881834 | 5.085909553 | protein_coding | 2 | 241938255 | 242034983 | SNED1    |
| ENSG00000162813 | 8.267164507 | 8.792849743 | protein_coding | 1 | 220230824 | 220263804 | BPNT1    |
| ENSG00000162814 | 2.928422289 | 3.748356452 | protein_coding | 1 | 217804666 | 218045038 | SPATA17  |
| ENSG00000162817 | 2.847891871 | 2.579085888 | protein_coding | 1 | 220863187 | 220872499 | C1orf115 |
| ENSG00000162819 | 9.305909516 | 9.264127823 | protein_coding | 1 | 222885895 | 222908538 | BROX     |
| ENSG00000162836 | 8.314756163 | 7.968104748 | protein_coding | 1 | 147119170 | 147142618 | ACP6     |
| ENSG00000162840 | 0.499066092 | 0.697730409 | pseudogene     | 4 | 69242041  | 69242226  | MT1P2    |
| ENSG00000162843 | 0           | 0.390640832 | protein_coding | 1 | 241815580 | 241965435 | WDR64    |
| ENSG00000162849 | 3.78787645  | 2.652276565 | protein_coding | 1 | 245318287 | 245872733 | KIF26B   |
| ENSG00000162851 | 7.797842652 | 8.352716275 | protein_coding | 1 | 246703862 | 246729626 | TFB2M    |
| ENSG00000162852 | 8.207901394 | 8.136991056 | protein_coding | 1 | 246729746 | 246831886 | CNST     |
| ENSG00000162869 | 6.598204782 | 6.686500471 | protein_coding | 2 | 48667737  | 48742525  | PPP1R21  |
| ENSG00000162873 | 0           | 0.697730409 | protein_coding | 1 | 205305220 | 205326166 | KLHDC8A  |
| ENSG00000162877 | 0.869158192 | 0.950786998 | protein_coding | 1 | 205797150 | 205819260 | PM20D1   |
| ENSG00000162878 | 3.603959378 | 4.508954154 | protein_coding | 2 | 42275160  | 42285668  | PKDCC    |
| ENSG00000162881 | 0.499066092 | 0.390640832 | protein_coding | 2 | 42989642  | 42991401  | OXER1    |
| ENSG00000162882 | 0.499066092 | 0           | protein_coding | 2 | 42994229  | 43019733  | HAAO     |
| ENSG00000162885 | 9.432976748 | 9.244291255 | protein_coding | 1 | 235610533 | 235667781 | B3GALNT2 |
| ENSG00000162888 | 3.004694206 | 3.748356452 | protein_coding | 1 | 206664449 | 206671061 | C1orf147 |
| ENSG00000162889 | 10.09071393 | 10.04288547 | protein_coding | 1 | 206858289 | 206907628 | MAPKAPK2 |
| ENSG00000162891 | 1.960915222 | 2.334191469 | protein_coding | 1 | 207038699 | 207042568 | IL20     |
| ENSG00000162892 | 6.502803968 | 6.775188634 | protein_coding | 1 | 207070788 | 207077484 | IL24     |
| ENSG00000162894 | 5.175139844 | 5.792353798 | protein_coding | 1 | 207077731 | 207096592 | FAIM3    |
| ENSG00000162896 | 1.799000381 | 0.697730409 | protein_coding | 1 | 207101863 | 207119811 | PIGR     |
| ENSG00000162897 | 0           | 0.390640832 | protein_coding | 1 | 207131310 | 207143970 | FCAMR    |
| ENSG00000162909 | 12.14039258 | 11.79114049 | protein_coding | 1 | 223889295 | 223963720 | CAPN2    |
| ENSG00000162910 | 8.068262669 | 8.585420545 | protein_coding | 1 | 228294380 | 228297013 | MRPL55   |
| ENSG00000162913 | 4.491309013 | 3.845183986 | protein_coding | 1 | 228391207 | 228401365 | C1orf145 |
| ENSG00000162923 | 10.44053968 | 10.47291982 | protein_coding | 1 | 224572845 | 224624735 | WDR26    |
| ENSG00000162924 | 5.752272083 | 5.84793576  | protein_coding | 2 | 61108656  | 61150645  | REL      |
| ENSG00000162927 | 4.568725997 | 5.187895122 | protein_coding | 2 | 61169104  | 61245389  | PUS10    |
| ENSG00000162928 | 7.402691859 | 7.495318771 | protein_coding | 2 | 61244360  | 61276394  | PEX13    |
| ENSG00000162929 | 6.47626108  | 6.470782801 | protein_coding | 2 | 61293006  | 61391960  | KIAA1841 |
| ENSG00000162931 | 3.652182994 | 3.411459265 | protein_coding | 1 | 228595641 | 228604562 | TRIM17   |
| ENSG00000162944 | 1.407729925 | 1.667587519 | protein_coding | 2 | 198435524 | 198540769 | RFTN2    |
| ENSG00000162946 | 4.19837882  | 5.824376633 | protein_coding | 1 | 231762561 | 232177018 | DISC1    |
| ENSG00000162949 | 0.499066092 | 0.390640832 | protein_coding | 2 | 30945637  | 31043408  | CAPN13   |
| ENSG00000162959 | 3.335220907 | 3.64455972  | protein_coding | 2 | 32092878  | 32236299  | MEMO1    |
| ENSG00000162961 | 7.68357507  | 7.815148897 | protein_coding | 2 | 32092878  | 32264881  | DPY30    |
| ENSG00000162971 | 6.84118134  | 6.365895578 | protein_coding | 2 | 200794698 | 200820459 | TYW5     |
| ENSG00000162972 | 7.572060955 | 6.99862477  | protein_coding | 2 | 200820040 | 200873263 | C2orf47  |
| ENSG00000162976 | 6.535310252 | 6.24096575  | protein_coding | 2 | 11295324  | 11319000  | QQLC3    |
| ENSG00000162980 | 8.75650134  | 8.514810202 | protein_coding | 2 | 152645498 | 152685009 | ARL5A    |
| ENSG00000162994 | 4.062237333 | 4.990346085 | protein_coding | 2 | 55401927  | 55459699  | C2orf63  |
| ENSG00000162997 | 3.603959378 | 3.935919592 | pseudogene     | 2 | 55509455  | 55511608  | PRORS1P  |
| ENSG00000162998 | 0.499066092 | 0.390640832 | protein_coding | 2 | 183698002 | 183731890 | FRZB     |
| ENSG00000162999 | 4.437288965 | 4.640685763 | protein_coding | 2 | 183943287 | 183964733 | DUSP19   |
| ENSG00000163001 | 7.434062125 | 8.075120324 | protein_coding | 2 | 55746740  | 55773015  | CCDC104  |
| ENSG00000163002 | 7.819120959 | 7.397596322 | protein_coding | 2 | 183982241 | 184026408 | NUP35    |
| ENSG00000163006 | 6.112579918 | 6.155435249 | protein_coding | 2 | 109403213 | 109493034 | CCDC138  |
| ENSG00000163009 | 5.331395195 | 4.468996429 | protein_coding | 2 | 10281509  | 10351851  | C2orf48  |
| ENSG00000163013 | 7.770795701 | 6.690849666 | protein_coding | 2 | 73481810  | 73511559  | FBXO41   |

|                 |             |             |                |   |           |           |           |
|-----------------|-------------|-------------|----------------|---|-----------|-----------|-----------|
| ENSG00000163016 | 0.869158192 | 1.353254395 | pseudogene     | 2 | 73872046  | 73912703  | ALMS1P    |
| ENSG00000163017 | 1.799000381 | 6.725179132 | protein_coding | 2 | 74119441  | 74146992  | ACTG2     |
| ENSG00000163026 | 7.420203928 | 7.222412001 | protein_coding | 2 | 24252210  | 24272445  | C2orf44   |
| ENSG00000163029 | 9.163444055 | 9.149514732 | protein_coding | 2 | 17845079  | 17981509  | SMC6      |
| ENSG00000163032 | 0           | 0.697730409 | protein_coding | 2 | 17720393  | 17838285  | VSNL1     |
| ENSG00000163040 | 5.346128795 | 5.200150955 | protein_coding | 2 | 132285248 | 132291239 | CCDC74A   |
| ENSG00000163041 | 5.938793061 | 6.535085617 | protein_coding | 1 | 226249552 | 226259702 | H3F3A     |
| ENSG00000163046 | 6.699208722 | 7.984140487 | protein_coding | 2 | 132905164 | 133015542 | ANKRD30BL |
| ENSG00000163050 | 9.438143322 | 9.706769688 | protein_coding | 1 | 227085237 | 227175246 | ADCK3     |
| ENSG00000163053 | 4.800350936 | 1.16600992  | protein_coding | 2 | 230899698 | 230933715 | SLC16A14  |
| ENSG00000163060 | 1.16343121  | 1.16600992  | protein_coding | 2 | 95537178  | 95542574  | TEKT4     |
| ENSG00000163064 | 2.238690726 | 1.518964905 | protein_coding | 2 | 119599766 | 119605254 | EN1       |
| ENSG00000163067 | 6.328285199 | 6.016808232 | protein_coding | 2 | 95831177  | 95850065  | ZNF2      |
| ENSG00000163069 | 7.630400601 | 8.263555427 | protein_coding | 4 | 52886872  | 52904648  | SGCB      |
| ENSG00000163072 | 3.393122761 | 3.570966319 | protein_coding | 2 | 169643049 | 169722024 | NOSTRIN   |
| ENSG00000163075 | 0.499066092 | 2.501982735 | protein_coding | 2 | 120302008 | 120419827 |           |
| ENSG00000163082 | 5.124761037 | 5.112089758 | protein_coding | 2 | 223289236 | 223425667 | SGPP2     |
| ENSG00000163083 | 3.211941663 | 2.334191469 | protein_coding | 2 | 121103719 | 121109384 | INHBB     |
| ENSG00000163092 | 0           | 0.950786998 | protein_coding | 2 | 167744997 | 168116263 | XIRP2     |
| ENSG00000163093 | 4.618121645 | 4.604259349 | protein_coding | 2 | 170335688 | 170382432 | BBS5      |
| ENSG00000163104 | 8.502378699 | 8.846464976 | protein_coding | 4 | 95128762  | 95212443  | SMARCAD1  |
| ENSG00000163106 | 0.499066092 | 0           | protein_coding | 4 | 95219686  | 95264027  | HPGDS     |
| ENSG00000163110 | 10.01666786 | 10.01583991 | protein_coding | 4 | 95373037  | 95589377  | PDLIM5    |
| ENSG00000163113 | 9.051032802 | 9.289442519 | protein_coding | 1 | 149912231 | 149982686 | OTUD7B    |
| ENSG00000163116 | 0.499066092 | 0.390640832 | protein_coding | 4 | 98105244  | 99064391  | C4orf37   |
| ENSG00000163121 | 5.40360309  | 6.281901708 | pseudogene     | 2 | 97163383  | 97173846  | NEURL3    |
| ENSG00000163125 | 9.990530519 | 9.8994674   | protein_coding | 1 | 150335567 | 150449042 | RPRD2     |
| ENSG00000163126 | 3.554067925 | 3.279072565 | protein_coding | 2 | 97490263  | 97523671  | ANKRD23   |
| ENSG00000163131 | 6.652556929 | 7.093659051 | protein_coding | 1 | 150702551 | 150738433 | CTSS      |
| ENSG00000163132 | 6.414691513 | 6.332882496 | protein_coding | 4 | 4861393   | 4865663   | MSX1      |
| ENSG00000163138 | 6.482942724 | 7.077141316 | protein_coding | 4 | 20697905  | 20754530  | PACRGL    |
| ENSG00000163141 | 2.928422289 | 3.133298822 | protein_coding | 1 | 151009046 | 151020076 | BNIP1     |
| ENSG00000163154 | 1.960915222 | 2.144285137 | protein_coding | 1 | 151129105 | 151132225 | TNFAIP8L2 |
| ENSG00000163155 | 6.851544845 | 6.988061092 | protein_coding | 1 | 151132224 | 151138424 | LYSMD1    |
| ENSG00000163156 | 8.465744027 | 8.9688072   | protein_coding | 1 | 151138498 | 151142773 | SCNM1     |
| ENSG00000163159 | 9.088754802 | 9.424191842 | protein_coding | 1 | 151142463 | 151167797 | VPS72     |
| ENSG00000163161 | 9.258993749 | 9.015499988 | protein_coding | 2 | 128014866 | 128051752 | ERCC3     |
| ENSG00000163162 | 9.038614381 | 8.501254594 | protein_coding | 2 | 101887681 | 101925163 | RNF149    |
| ENSG00000163166 | 9.665877245 | 9.254610923 | protein_coding | 2 | 128193783 | 128284462 | IWS1      |
| ENSG00000163170 | 6.155035276 | 6.963107483 | protein_coding | 2 | 74362525  | 74375121  | BOLA3     |
| ENSG00000163171 | 9.855452651 | 9.797285822 | protein_coding | 2 | 37869032  | 37965611  | CDC42EP3  |
| ENSG00000163191 | 12.38518684 | 12.72811878 | protein_coding | 1 | 152004982 | 152020383 | S100A11   |
| ENSG00000163207 | 1.16343121  | 0           | protein_coding | 1 | 152881021 | 152884362 | IVL       |
| ENSG00000163214 | 8.725846631 | 8.750768196 | protein_coding | 2 | 39024871  | 39103075  | DHX57     |
| ENSG00000163216 | 0.499066092 | 0           | protein_coding | 1 | 153012201 | 153014407 | SPRR2D    |
| ENSG00000163218 | 0           | 0.697730409 | protein_coding | 1 | 153302596 | 153321316 | PGLYRP4   |
| ENSG00000163220 | 6.26766507  | 4.547834947 | protein_coding | 1 | 153330330 | 153333503 | S100A9    |
| ENSG00000163221 | 0           | 0.390640832 | protein_coding | 1 | 153346184 | 153348125 | S100A12   |
| ENSG00000163235 | 8.274885464 | 5.629711952 | protein_coding | 2 | 70674412  | 70781325  | TGFA      |
| ENSG00000163249 | 9.320904342 | 8.308116953 | protein_coding | 2 | 208576264 | 208626563 | CCNYL1    |
| ENSG00000163251 | 7.546773135 | 6.835357159 | protein_coding | 2 | 208627310 | 208634287 | FZD5      |
| ENSG00000163257 | 8.631273684 | 8.985720419 | protein_coding | 4 | 17802278  | 17812381  | DCAF16    |
| ENSG00000163263 | 1.407729925 | 0           | protein_coding | 1 | 154171848 | 154178809 | C1orf189  |
| ENSG00000163281 | 7.08025234  | 7.201227369 | protein_coding | 4 | 44703885  | 44728612  | GNPDA2    |
| ENSG00000163283 | 0.499066092 | 0.950786998 | protein_coding | 2 | 233243244 | 233247599 | ALPP      |
| ENSG00000163291 | 7.943018447 | 8.200898549 | protein_coding | 4 | 79808281  | 79860592  | PAQR3     |
| ENSG00000163293 | 6.528867325 | 5.339632724 | protein_coding | 4 | 47916159  | 48042188  | NIPAL1    |
| ENSG00000163297 | 8.641761486 | 8.697730375 | protein_coding | 4 | 80822303  | 81046608  | ANTXR2    |
| ENSG00000163312 | 6.456028446 | 6.539915281 | protein_coding | 4 | 84328496  | 84377009  | HELQ      |
| ENSG00000163319 | 6.676071387 | 7.135740508 | protein_coding | 4 | 84377085  | 84390888  | MRPS18C   |
| ENSG00000163320 | 9.328343713 | 9.253876247 | protein_coding | 3 | 88101094  | 88199035  | CGGBP1    |
| ENSG00000163322 | 6.129712275 | 6.123616685 | protein_coding | 4 | 84382092  | 84444501  | FAM175A   |
| ENSG00000163328 | 3.911897206 | 4.250702764 | protein_coding | 2 | 175296966 | 175351822 | GPR155    |

|                 |             |             |                |   |           |           |          |
|-----------------|-------------|-------------|----------------|---|-----------|-----------|----------|
| ENSG00000163344 | 8.858936753 | 8.927940468 | protein_coding | 1 | 154897210 | 154909467 | PMVK     |
| ENSG00000163346 | 8.53328596  | 9.042126408 | protein_coding | 1 | 154916552 | 154928599 | PBXIP1   |
| ENSG00000163347 | 10.36659374 | 10.83407108 | protein_coding | 3 | 190023490 | 190040264 | CLDN1    |
| ENSG00000163348 | 9.690621167 | 9.905093382 | protein_coding | 1 | 154929502 | 154936329 | PYGO2    |
| ENSG00000163349 | 9.2686931   | 9.113519788 | protein_coding | 1 | 114471814 | 114520426 | HIPK1    |
| ENSG00000163352 | 0.499066092 | 1.16600992  | protein_coding | 1 | 154966062 | 154966791 | LENEP    |
| ENSG00000163354 | 4.292665995 | 4.489113623 | protein_coding | 1 | 154990996 | 155006257 | DCST2    |
| ENSG00000163357 | 3.274897671 | 3.368666104 | protein_coding | 1 | 155006300 | 155023406 | DCST1    |
| ENSG00000163359 | 3.211941663 | 3.87606762  | protein_coding | 2 | 238232646 | 238323018 | COL6A3   |
| ENSG00000163362 | 8.42468852  | 8.431497548 | protein_coding | 1 | 200860176 | 200884863 | C1orf106 |
| ENSG00000163364 | 1.16343121  | 1.16600992  | lincRNA        | 2 | 177494568 | 177502659 |          |
| ENSG00000163374 | 8.974866377 | 8.950786969 | protein_coding | 1 | 155629237 | 155658791 | YY1AP1   |
| ENSG00000163376 | 5.360713447 | 5.212303549 | protein_coding | 3 | 67048727  | 67061634  | KBTBD8   |
| ENSG00000163378 | 7.615275323 | 7.467704891 | protein_coding | 3 | 69024365  | 69063112  | C3orf64  |
| ENSG00000163380 | 0.499066092 | 1.518964905 | protein_coding | 3 | 69156023  | 69172183  | LMOD3    |
| ENSG00000163382 | 10.38944493 | 10.54345622 | protein_coding | 1 | 156561542 | 156564091 | APOA1BP  |
| ENSG00000163386 | 8.018542337 | 8.322202916 | protein_coding | 1 | 145289772 | 145370303 | NBPF10   |
| ENSG00000163389 | 7.356139979 | 7.668495823 | protein_coding | 3 | 119187785 | 119213555 | POGLUT1  |
| ENSG00000163393 | 4.77879189  | 5.393992    | protein_coding | 1 | 116519119 | 116612675 | SLC22A15 |
| ENSG00000163395 | 7.266040677 | 7.321103092 | protein_coding | 1 | 201159953 | 201198080 | IGFN1    |
| ENSG00000163399 | 12.24850143 | 11.94550623 | protein_coding | 1 | 116915290 | 116952883 | ATP1A1   |
| ENSG00000163406 | 3.146112541 | 3.781359661 | protein_coding | 3 | 121612936 | 121663034 | SLC15A2  |
| ENSG00000163412 | 3.989024711 | 3.993387124 | protein_coding | 3 | 71728440  | 71803924  | EIF4E3   |
| ENSG00000163428 | 9.547364003 | 9.314320673 | protein_coding | 3 | 120043356 | 120068186 | LRRCS58  |
| ENSG00000163430 | 10.57208566 | 11.41228256 | protein_coding | 3 | 120111140 | 120170100 | FSTL1    |
| ENSG00000163431 | 2.471521042 | 0.950786998 | protein_coding | 1 | 201865580 | 201915716 | LMOD1    |
| ENSG00000163435 | 9.479658457 | 8.948972504 | protein_coding | 1 | 201977073 | 201986316 | ELF3     |
| ENSG00000163444 | 8.29020451  | 8.282410365 | protein_coding | 1 | 202976514 | 202993976 | TMEM183A |
| ENSG00000163449 | 1.616589159 | 1.802319292 | protein_coding | 2 | 216946589 | 216967506 | TMEM169  |
| ENSG00000163453 | 5.301468762 | 7.666288907 | protein_coding | 4 | 57896939  | 57976551  | IGFBP7   |
| ENSG00000163462 | 4.6658819   | 5.35066967  | protein_coding | 1 | 155145873 | 155157447 | TRIM46   |
| ENSG00000163463 | 8.869173944 | 9.636922921 | protein_coding | 1 | 155141884 | 155159747 | KRTCAP2  |
| ENSG00000163464 | 0           | 0.390640832 | protein_coding | 2 | 219027568 | 219031725 | CXCR1    |
| ENSG00000163466 | 11.26814714 | 11.29612225 | protein_coding | 2 | 219081817 | 219119079 | ARPC2    |
| ENSG00000163467 | 3.146112541 | 4.342020395 | protein_coding | 1 | 156307105 | 156316786 | C1orf182 |
| ENSG00000163468 | 12.64005367 | 12.91688866 | protein_coding | 1 | 156278759 | 156337664 | CCT3     |
| ENSG00000163472 | 6.676071387 | 7.087074634 | protein_coding | 1 | 156252726 | 156262976 | TMEM79   |
| ENSG00000163479 | 11.33683831 | 11.63612717 | protein_coding | 1 | 155978839 | 155990750 | SSR2     |
| ENSG00000163481 | 7.615275323 | 7.652976045 | protein_coding | 2 | 219528587 | 219537134 | RNF25    |
| ENSG00000163482 | 8.369868254 | 9.005932523 | protein_coding | 2 | 219536749 | 219567439 | STK36    |
| ENSG00000163485 | 5.672682881 | 5.776071827 | protein_coding | 1 | 203059782 | 203136533 | ADORA1   |
| ENSG00000163486 | 9.856739382 | 9.753777222 | protein_coding | 1 | 206516198 | 206637783 | SRGAP2   |
| ENSG00000163491 | 3.274897671 | 4.048652948 | protein_coding | 3 | 27151576  | 27410951  | NEK10    |
| ENSG00000163492 | 2.238690726 | 2.501982735 | protein_coding | 2 | 179694484 | 179914813 | CCDC141  |
| ENSG00000163497 | 0           | 0.390640832 | protein_coding | 2 | 219845809 | 219850379 | FEV      |
| ENSG00000163499 | 2.57521082  | 3.279072565 | protein_coding | 2 | 219854911 | 219858143 | CRYBA2   |
| ENSG00000163501 | 0           | 0.950786998 | protein_coding | 2 | 219919146 | 219925189 | IHH      |
| ENSG00000163507 | 8.512210607 | 8.638170933 | protein_coding | 3 | 108268833 | 108308491 | KIAA1524 |
| ENSG00000163510 | 8.462367008 | 8.341695034 | protein_coding | 2 | 180809603 | 180871840 | CWC22    |
| ENSG00000163512 | 7.399163791 | 7.625976011 | protein_coding | 3 | 28356494  | 28390618  | AZI2     |
| ENSG00000163513 | 9.102921211 | 8.976843446 | protein_coding | 3 | 30647994  | 30735634  | TGFBR2   |
| ENSG00000163515 | 0.869158192 | 0.697730409 | protein_coding | 3 | 108462271 | 108476231 | RETNLB   |
| ENSG00000163516 | 8.996041004 | 9.57591961  | protein_coding | 2 | 220094479 | 220101391 | ANKZF1   |
| ENSG00000163517 | 7.308035767 | 6.877938671 | protein_coding | 3 | 13521224  | 13547916  | HDAC11   |
| ENSG00000163520 | 8.393111514 | 10.30894936 | protein_coding | 3 | 13573824  | 13679922  | FBLN2    |
| ENSG00000163521 | 5.91922012  | 5.863430791 | protein_coding | 2 | 220101328 | 220110200 | GLB1L    |
| ENSG00000163527 | 10.53197424 | 10.80978277 | protein_coding | 3 | 31574130  | 31679112  | STT3B    |
| ENSG00000163528 | 7.593829938 | 7.625976011 | protein_coding | 3 | 14153580  | 14166370  | CHCHD4   |
| ENSG00000163531 | 1.407729925 | 1.667587519 | protein_coding | 1 | 204797779 | 204991950 | NFASC    |
| ENSG00000163534 | 0           | 0.697730409 | protein_coding | 1 | 157764193 | 157789895 | FCRL1    |
| ENSG00000163535 | 8.479173607 | 8.524589435 | protein_coding | 2 | 201374731 | 201448505 | SGOL2    |
| ENSG00000163536 | 2.10647801  | 2.721932731 | protein_coding | 3 | 167453031 | 167543356 | SERPINI1 |
| ENSG00000163539 | 8.695964893 | 8.720244202 | protein_coding | 3 | 33537737  | 33759848  | CLASP2   |

|                 |             |             |                |    |           |           |          |
|-----------------|-------------|-------------|----------------|----|-----------|-----------|----------|
| ENSG00000163541 | 9.579671796 | 9.945238564 | protein_coding | 2  | 84650647  | 84687169  | SUCLG1   |
| ENSG00000163545 | 8.839544001 | 8.913126522 | protein_coding | 1  | 205271187 | 205290883 | NUAK2    |
| ENSG00000163554 | 0.499066092 | 0.390640832 | protein_coding | 1  | 158580278 | 158656488 | SPTA1    |
| ENSG00000163558 | 9.319038489 | 8.932538804 | protein_coding | 3  | 169940153 | 170023769 | PRKCI    |
| ENSG00000163565 | 10.93178763 | 11.60059563 | protein_coding | 1  | 158969758 | 159024945 | IFI16    |
| ENSG00000163568 | 6.496213887 | 6.316088276 | protein_coding | 1  | 159032274 | 159116886 | AIM2     |
| ENSG00000163576 | 0.869158192 | 0.950786998 | protein_coding | 3  | 19920964  | 19988517  | EFHB     |
| ENSG00000163577 | 7.527512071 | 6.725179132 | protein_coding | 3  | 170606204 | 170626482 | EIF5A2   |
| ENSG00000163581 | 0           | 0.697730409 | protein_coding | 3  | 170714137 | 170744539 | SLC2A2   |
| ENSG00000163584 | 7.717966186 | 8.18248514  | protein_coding | 3  | 170582664 | 170588272 | RPL22L1  |
| ENSG00000163586 | 0           | 0.390640832 | protein_coding | 2  | 88422510  | 88427635  | FABP1    |
| ENSG00000163590 | 4.981125677 | 6.281901708 | protein_coding | 3  | 160473390 | 160796695 | PPM1L    |
| ENSG00000163596 | 4.491309013 | 5.32851069  | protein_coding | 2  | 203640690 | 203736708 | ICA1L    |
| ENSG00000163597 | 10.75054042 | 10.68261991 | protein_coding | 17 | 74553852  | 74561430  |          |
| ENSG00000163602 | 8.286389971 | 8.109639521 | protein_coding | 3  | 72423744  | 72496069  | RYBP     |
| ENSG00000163605 | 8.922987828 | 9.02758571  | protein_coding | 3  | 73045936  | 73118350  | PPP4R2   |
| ENSG00000163606 | 0.499066092 | 0.950786998 | protein_coding | 3  | 112640056 | 112693969 | CD200R1  |
| ENSG00000163607 | 6.364918751 | 6.695185789 | protein_coding | 3  | 112709765 | 112733907 | GTPBP8   |
| ENSG00000163608 | 8.70742151  | 8.658298522 | protein_coding | 3  | 112721287 | 112738708 | C3orf17  |
| ENSG00000163611 | 7.250461488 | 6.628734426 | protein_coding | 3  | 113161565 | 113234034 | SPICE1   |
| ENSG00000163612 | 0.869158192 | 0.950786998 | pseudogene     | 4  | 9155022   | 9167177   |          |
| ENSG00000163617 | 6.252103507 | 6.3217081   | protein_coding | 3  | 113682984 | 113775460 | KIAA1407 |
| ENSG00000163623 | 1.616589159 | 1.925536307 | protein_coding | 4  | 85413061  | 85419603  | NKX6-1   |
| ENSG00000163624 | 5.938793061 | 3.183544561 | protein_coding | 4  | 85504132  | 85572491  | CDS1     |
| ENSG00000163625 | 8.616157604 | 8.929781562 | protein_coding | 4  | 85590704  | 85887544  | WDFY3    |
| ENSG00000163626 | 7.140657543 | 7.138927266 | protein_coding | 4  | 73921797  | 73935472  | COX18    |
| ENSG00000163629 | 7.381392865 | 7.23139676  | protein_coding | 4  | 87515468  | 87736324  | PTPN13   |
| ENSG00000163631 | 0.499066092 | 2.420525079 | protein_coding | 4  | 74262831  | 74287129  | ALB      |
| ENSG00000163632 | 1.16343121  | 1.16600992  | protein_coding | 3  | 63805038  | 63834312  | C3orf49  |
| ENSG00000163633 | 3.989024711 | 4.826083323 | protein_coding | 4  | 87797358  | 87857354  | C4orf36  |
| ENSG00000163634 | 8.582333986 | 8.89250574  | protein_coding | 3  | 63819546  | 63849579  | THOC7    |
| ENSG00000163635 | 8.120617457 | 8.253299769 | protein_coding | 3  | 63850233  | 63989138  | ATXN7    |
| ENSG00000163636 | 9.135091581 | 9.635231414 | protein_coding | 3  | 63996225  | 64009658  | PSMD6    |
| ENSG00000163637 | 7.464764762 | 8.098224647 | protein_coding | 3  | 64079543  | 64431152  | PRICKLE2 |
| ENSG00000163638 | 8.865343505 | 9.213637661 | protein_coding | 3  | 64501333  | 64673676  | ADAMTS9  |
| ENSG00000163644 | 6.469548347 | 6.601272494 | protein_coding | 4  | 89183315  | 89205921  | PPM1K    |
| ENSG00000163645 | 0           | 0.950786998 | protein_coding | 3  | 150377672 | 150421758 | FAM194A  |
| ENSG00000163655 | 10.37470026 | 10.22971271 | protein_coding | 3  | 155588325 | 155658457 | GMPS     |
| ENSG00000163659 | 9.25411951  | 8.891561392 | protein_coding | 3  | 156391024 | 156424559 | TIPARP   |
| ENSG00000163660 | 10.39344018 | 9.681859685 | protein_coding | 3  | 156864297 | 156878549 | CNCL1    |
| ENSG00000163661 | 9.796999249 | 10.65811888 | protein_coding | 3  | 157154578 | 157161417 | PTX3     |
| ENSG00000163666 | 3.004694206 | 2.788380093 | protein_coding | 3  | 57231944  | 57260549  | HESX1    |
| ENSG00000163681 | 9.842521827 | 9.596348809 | protein_coding | 3  | 57741177  | 57914895  | SLMAP    |
| ENSG00000163682 | 7.491518048 | 8.298174303 | protein_coding | 4  | 39455744  | 39460568  | RPL9     |
| ENSG00000163683 | 6.820228284 | 7.154756319 | protein_coding | 4  | 39552541  | 39640710  | C4orf34  |
| ENSG00000163684 | 2.928422289 | 2.721932731 | protein_coding | 3  | 58291974  | 58305816  | RPP14    |
| ENSG00000163686 | 6.693459083 | 6.365895578 | protein_coding | 3  | 58223233  | 58281420  | ABHD6    |
| ENSG00000163689 | 6.086493765 | 5.871116342 | protein_coding | 3  | 58703092  | 59035810  | C3orf67  |
| ENSG00000163694 | 8.99837467  | 7.817139602 | protein_coding | 4  | 40425272  | 40632892  | RBM47    |
| ENSG00000163697 | 8.937654214 | 8.768365845 | protein_coding | 4  | 40812044  | 41218731  | APBB2    |
| ENSG00000163701 | 4.19837882  | 2.242360793 | protein_coding | 3  | 9944296   | 9958086   | IL17RE   |
| ENSG00000163702 | 8.229914881 | 8.193254836 | protein_coding | 3  | 9958758   | 9975314   | IL17RC   |
| ENSG00000163703 | 7.178195136 | 7.182818183 | protein_coding | 3  | 9975506   | 9987097   | CRELD1   |
| ENSG00000163704 | 4.863159938 | 4.841813558 | protein_coding | 3  | 9987226   | 9994078   | PRRT3    |
| ENSG00000163705 | 1.16343121  | 0.950786998 | protein_coding | 3  | 10123001  | 10149915  | C3orf24  |
| ENSG00000163710 | 5.879259127 | 6.637773454 | protein_coding | 3  | 142534764 | 142608045 | PCOLCE2  |
| ENSG00000163714 | 10.53840334 | 10.79496056 | protein_coding | 3  | 142720010 | 142779567 | U2SURP   |
| ENSG00000163719 | 8.547698305 | 8.552341023 | protein_coding | 3  | 9691117   | 9744077   | MTMR14   |
| ENSG00000163728 | 7.494827594 | 8.061749803 | protein_coding | 3  | 180319918 | 180335616 | TTC14    |
| ENSG00000163734 | 6.275383355 | 6.403479675 | protein_coding | 4  | 74902306  | 74904524  | CXCL3    |
| ENSG00000163735 | 8.077121473 | 8.69988975  | protein_coding | 4  | 74861359  | 74864496  | CXCL5    |
| ENSG00000163738 | 6.350376764 | 6.99159092  | protein_coding | 4  | 74979891  | 75168816  | MTHFD2L  |
| ENSG00000163739 | 10.1242235  | 11.09771094 | protein_coding | 4  | 74735110  | 74736959  | CXCL1    |

|                 |             |             |                  |   |           |           |          |
|-----------------|-------------|-------------|------------------|---|-----------|-----------|----------|
| ENSG00000163743 | 7.04004079  | 7.106738413 | protein_coding   | 4 | 76404247  | 76439974  | RCHY1    |
| ENSG00000163746 | 0.499066092 |             | 0 protein_coding | 3 | 146109208 | 146213778 | PLSCR2   |
| ENSG00000163749 | 0.499066092 |             | 0 protein_coding | 4 | 77234154  | 77343021  | CCDC158  |
| ENSG00000163754 | 8.515473076 | 8.49131535  | protein_coding   | 3 | 148709128 | 148745419 | GYG1     |
| ENSG00000163755 | 9.517573819 | 9.008548131 | protein_coding   | 3 | 148847371 | 148891519 | HPS3     |
| ENSG00000163762 | 4.842525946 | 1.16600992  | protein_coding   | 3 | 149036285 | 149052201 | TM4SF18  |
| ENSG00000163781 | 9.673199027 | 9.574155001 | protein_coding   | 3 | 133317019 | 133380737 | TOPBP1   |
| ENSG00000163785 | 9.40334477  | 9.317839931 | protein_coding   | 3 | 133794023 | 133969689 | RYK      |
| ENSG00000163788 | 7.04004079  | 7.087074634 | protein_coding   | 3 | 43328004  | 43466256  | SNRK     |
| ENSG00000163793 | 1.16343121  | 0.950786998 | protein_coding   | 2 | 27498289  | 27504367  | DNAJC5G  |
| ENSG00000163794 | 3.78787645  | 3.813624741 | protein_coding   | 2 | 27530268  | 27531313  | UCN      |
| ENSG00000163795 | 6.050961887 | 5.717592784 | protein_coding   | 2 | 27600098  | 27603657  | ZNF513   |
| ENSG00000163798 | 8.555643385 | 8.615472585 | protein_coding   | 2 | 27886338  | 27917840  | SLC4A1AP |
| ENSG00000163803 | 3.274897671 | 2.788380093 | protein_coding   | 2 | 28680012  | 28866654  | PLB1     |
| ENSG00000163806 | 3.004694206 | 3.87606762  | protein_coding   | 2 | 29005383  | 29073477  | SPDYA    |
| ENSG00000163807 | 8.3053626   | 8.444434101 | protein_coding   | 3 | 44779153  | 44803154  | KIAA1143 |
| ENSG00000163808 | 8.129161475 | 8.378559146 | protein_coding   | 3 | 44803209  | 44914868  | KIF15    |
| ENSG00000163810 | 3.652182994 | 3.411459265 | protein_coding   | 3 | 44916100  | 44956482  | TGM4     |
| ENSG00000163811 | 10.21280407 | 10.28793047 | protein_coding   | 2 | 29117509  | 29171088  | WDR43    |
| ENSG00000163812 | 9.36407124  | 9.097229165 | protein_coding   | 3 | 44956749  | 45017677  | ZDHH3C   |
| ENSG00000163814 | 9.582785382 | 10.02620285 | protein_coding   | 3 | 45123770  | 45187914  | CDCP1    |
| ENSG00000163815 | 1.407729925 | 1.667587519 | protein_coding   | 3 | 45043040  | 45077563  | CLEC3B   |
| ENSG00000163817 | 1.407729925 | 0.950786998 | protein_coding   | 3 | 45796942  | 45838027  | SLC6A20  |
| ENSG00000163818 | 7.066972635 | 7.213370937 | protein_coding   | 3 | 45864808  | 45957534  | LZTFL1   |
| ENSG00000163820 | 9.199386995 | 9.228672011 | protein_coding   | 3 | 45959396  | 46037316  | FYCO1    |
| ENSG00000163823 | 1.16343121  | 1.518964905 | protein_coding   | 3 | 46243200  | 46249887  | CCR1     |
| ENSG00000163825 | 1.616589159 | 3.232099092 | protein_coding   | 3 | 46538981  | 46542439  | RTP3     |
| ENSG00000163827 | 0.499066092 |             | 0 protein_coding | 3 | 46556913  | 46621589  | LRR2     |
| ENSG00000163832 | 7.743231983 | 8.24888207  | protein_coding   | 3 | 47537130  | 47555251  | C3orf75  |
| ENSG00000163833 | 0.499066092 | 0.390640832 | protein_coding   | 3 | 121311966 | 121349139 | FBXO40   |
| ENSG00000163840 | 9.648894781 | 9.741251102 | protein_coding   | 3 | 122283085 | 122294050 | DTX3L    |
| ENSG00000163848 | 8.888175056 | 8.674859633 | protein_coding   | 3 | 124944405 | 125094198 | ZNF148   |
| ENSG00000163864 | 1.799000381 | 0.950786998 | protein_coding   | 3 | 139279022 | 139396859 | NMNAT3   |
| ENSG00000163866 | 7.962273293 | 8.196317182 | protein_coding   | 1 | 35178338  | 35325417  | C1orf212 |
| ENSG00000163867 | 7.568924112 | 7.797107849 | protein_coding   | 1 | 35447134  | 35497569  | ZMYM6    |
| ENSG00000163870 | 9.49544012  | 9.705158168 | protein_coding   | 3 | 127291912 | 127317094 | TPRA1    |
| ENSG00000163872 | 9.775389681 | 9.647589989 | protein_coding   | 3 | 183415606 | 183530413 | YEATS2   |
| ENSG00000163873 | 0.499066092 |             | 0 protein_coding | 1 | 37261128  | 37499730  | GRIK3    |
| ENSG00000163874 | 10.0326953  | 9.653729801 | protein_coding   | 1 | 37940153  | 37949978  | ZC3H12A  |
| ENSG00000163875 | 8.131289597 | 8.188649093 | protein_coding   | 1 | 37958176  | 37980375  | MEAF6    |
| ENSG00000163877 | 6.970425921 | 7.050313162 | protein_coding   | 1 | 38002142  | 38019905  | SNIP1    |
| ENSG00000163879 | 0.499066092 | 1.518964905 | protein_coding   | 1 | 38022520  | 38032458  | DNALI1   |
| ENSG00000163882 | 9.553725034 | 9.636359306 | protein_coding   | 3 | 184079506 | 184086384 | POLR2H   |
| ENSG00000163884 | 1.616589159 | 2.579085888 | protein_coding   | 3 | 126061478 | 126076285 | KLF15    |
| ENSG00000163885 | 1.16343121  | 2.144285137 | protein_coding   | 3 | 126113782 | 126155399 | CCDC37   |
| ENSG00000163888 | 5.054730169 | 4.65855978  | protein_coding   | 3 | 183977001 | 183979251 | CAMK2N2  |
| ENSG00000163898 | 7.097770581 | 7.016060809 | protein_coding   | 3 | 185224050 | 185270401 | LIPH     |
| ENSG00000163900 | 8.169068555 | 7.869875863 | protein_coding   | 3 | 185194284 | 185216845 | TMEM41A  |
| ENSG00000163902 | 11.56336037 | 11.50642848 | protein_coding   | 3 | 128338817 | 128399918 | RPN1     |
| ENSG00000163904 | 8.958179637 | 8.455978641 | protein_coding   | 3 | 185300284 | 185351339 | SENP2    |
| ENSG00000163909 | 5.072559152 | 4.961837817 | protein_coding   | 1 | 40089825  | 40105617  | HEYL     |
| ENSG00000163913 | 8.515473076 | 8.289597152 | protein_coding   | 3 | 129158968 | 129239198 | IFT122   |
| ENSG00000163914 | 0.499066092 |             | 0 protein_coding | 3 | 129247483 | 129254012 | RHO      |
| ENSG00000163915 | 1.960915222 | 1.802319292 | protein_coding   | 3 | 185430316 | 185447575 | C3orf65  |
| ENSG00000163918 | 9.024943975 | 9.109464345 | protein_coding   | 3 | 186507669 | 186524847 | RFC4     |
| ENSG00000163923 | 8.261346552 | 8.334763756 | protein_coding   | 3 | 186838736 | 186898696 | RPL39L   |
| ENSG00000163930 | 10.01896842 | 9.782588703 | protein_coding   | 3 | 52435029  | 52444366  | BAP1     |
| ENSG00000163931 | 11.94373102 | 11.64568034 | protein_coding   | 3 | 53258723  | 53290068  | TKT      |
| ENSG00000163932 | 8.133414584 | 8.026050991 | protein_coding   | 3 | 53190025  | 53226733  | PRKCD    |
| ENSG00000163933 | 8.041355121 | 8.135396417 | protein_coding   | 3 | 53122499  | 53164478  | RFT1     |
| ENSG00000163935 | 8.429884808 | 8.69123279  | protein_coding   | 3 | 52937693  | 53080766  | SFMBT1   |
| ENSG00000163938 | 10.23424851 | 10.40902214 | protein_coding   | 3 | 52715172  | 52728508  | GNL3     |
| ENSG00000163939 | 8.297803463 | 8.649387576 | protein_coding   | 3 | 52579368  | 52719933  | PBRM1    |



|                 |             |             |                |   |           |           |          |
|-----------------|-------------|-------------|----------------|---|-----------|-----------|----------|
| ENSG00000163945 | 7.488200893 | 7.343375265 | protein_coding | 4 | 1341054   | 1381837   | KIAA1530 |
| ENSG00000163946 | 10.2752422  | 9.99840118  | protein_coding | 3 | 56654161  | 56717265  | FAM208A  |
| ENSG00000163947 | 8.12703021  | 7.524852175 | protein_coding | 3 | 56761446  | 57113357  | ARHGEF3  |
| ENSG00000163950 | 9.201414078 | 9.23613084  | protein_coding | 4 | 1694527   | 1714282   | SLBP     |
| ENSG00000163956 | 9.630205981 | 10.24050771 | protein_coding | 4 | 3508103   | 3534286   | LRPAP1   |
| ENSG00000163958 | 0.869158192 | 0.390640832 | protein_coding | 3 | 195924320 | 195938308 | ZDHC19   |
| ENSG00000163959 | 4.903563137 | 5.236305879 | protein_coding | 3 | 195938358 | 195970049 |          |
| ENSG00000163960 | 9.875903885 | 9.607318979 | protein_coding | 3 | 196074533 | 196159345 | UBXN7    |
| ENSG00000163961 | 9.207478296 | 8.668257984 | protein_coding | 3 | 196195654 | 196230639 | RNF168   |
| ENSG00000163964 | 8.213938461 | 7.799123587 | protein_coding | 3 | 196366646 | 196462878 | PIGX     |
| ENSG00000163975 | 10.42717699 | 10.15298033 | protein_coding | 3 | 196715492 | 196756687 | MFI2     |
| ENSG00000163993 | 3.698846687 | 2.039052734 | protein_coding | 4 | 6694796   | 6698897   | S100P    |
| ENSG00000163995 | 5.054730169 | 4.693656882 | protein_coding | 4 | 7967039   | 8160559   | ABLIM2   |
| ENSG00000164002 | 5.858855738 | 5.938503778 | protein_coding | 1 | 40974413  | 40982228  | DEM1     |
| ENSG00000164007 | 0.499066092 | 0           | protein_coding | 1 | 43198764  | 43205925  | CLDN19   |
| ENSG00000164008 | 4.491309013 | 5.236305879 | protein_coding | 1 | 43232940  | 43264127  | C1orf50  |
| ENSG00000164010 | 5.360713447 | 6.104183162 | protein_coding | 1 | 43282795  | 43310660  | ERMAP    |
| ENSG00000164011 | 5.741167503 | 6.450406542 | protein_coding | 1 | 43312280  | 43318148  | ZNF691   |
| ENSG00000164022 | 8.628263112 | 8.967911514 | protein_coding | 4 | 107236701 | 107270383 | AIMP1    |
| ENSG00000164023 | 8.70742151  | 8.471229048 | protein_coding | 4 | 108745719 | 108836203 | SGMS2    |
| ENSG00000164024 | 9.369490093 | 9.450720858 | protein_coding | 4 | 99916771  | 99983964  | METAP1   |
| ENSG00000164031 | 8.213938461 | 8.234057939 | protein_coding | 4 | 100817405 | 100867883 | DNAJB14  |
| ENSG00000164032 | 10.88115523 | 11.49792174 | protein_coding | 4 | 100869243 | 100871545 | H2AFZ    |
| ENSG00000164035 | 0           | 0.390640832 | protein_coding | 4 | 101316498 | 101801283 | EMCN     |
| ENSG00000164037 | 1.960915222 | 1.16600992  | protein_coding | 4 | 103806205 | 103940896 | SLC9B1   |
| ENSG00000164038 | 6.825495146 | 7.272601283 | protein_coding | 4 | 103941025 | 104006986 | SLC9B2   |
| ENSG00000164039 | 4.842525946 | 6.077857763 | protein_coding | 4 | 104000592 | 104021040 | BDH2     |
| ENSG00000164040 | 9.3522601   | 9.87244022  | protein_coding | 4 | 129190392 | 129209984 | PGRMC2   |
| ENSG00000164045 | 8.137655191 | 7.830998152 | protein_coding | 3 | 48198636  | 48229892  | CDC25A   |
| ENSG00000164048 | 7.15746161  | 7.635032283 | protein_coding | 3 | 48282590  | 48340743  | ZNF589   |
| ENSG00000164049 | 1.16343121  | 0.390640832 | protein_coding | 3 | 48413709  | 48442666  | FBXW12   |
| ENSG00000164050 | 8.37885234  | 7.749951106 | protein_coding | 3 | 48445261  | 48471594  | PLXNB1   |
| ENSG00000164051 | 7.712290964 | 7.696882678 | protein_coding | 3 | 48473574  | 48481866  | CCDC51   |
| ENSG00000164053 | 7.575190993 | 7.357122767 | protein_coding | 3 | 48488114  | 48507115  | ATRIP    |
| ENSG00000164054 | 10.54600086 | 10.58639925 | protein_coding | 3 | 48509197  | 48542259  | SHISA5   |
| ENSG00000164056 | 5.909333162 | 5.960284481 | protein_coding | 4 | 124317950 | 124324910 | SPRY1    |
| ENSG00000164061 | 5.498982484 | 5.683080141 | protein_coding | 3 | 49591922  | 49708978  | BSN      |
| ENSG00000164062 | 10.29862807 | 10.19377319 | protein_coding | 3 | 49711435  | 49721396  | APEH     |
| ENSG00000164066 | 5.806547963 | 6.204928885 | protein_coding | 4 | 128544426 | 128637930 | INTU     |
| ENSG00000164068 | 8.826469148 | 8.726612716 | protein_coding | 3 | 49726932  | 49758962  | RNF123   |
| ENSG00000164070 | 8.229914881 | 8.594734178 | protein_coding | 4 | 128702976 | 128755226 | HSPA4L   |
| ENSG00000164073 | 6.554468172 | 6.941369681 | protein_coding | 4 | 128883960 | 128887150 | MFSD8    |
| ENSG00000164074 | 6.320845526 | 6.440109466 | protein_coding | 4 | 128886435 | 128960866 | C4orf29  |
| ENSG00000164076 | 0.499066092 | 0           | protein_coding | 3 | 49895421  | 49907655  | CAMKV    |
| ENSG00000164077 | 7.587643674 | 7.793067905 | protein_coding | 3 | 49946302  | 49967606  | MON1A    |
| ENSG00000164078 | 8.794597401 | 7.760334499 | protein_coding | 3 | 49924435  | 49941299  | MST1R    |
| ENSG00000164080 | 7.058051099 | 6.843193319 | protein_coding | 3 | 51575596  | 51697610  | RAD54L2  |
| ENSG00000164081 | 7.748787017 | 8.177844832 | protein_coding | 3 | 51696709  | 51738339  | TEX264   |
| ENSG00000164082 | 1.960915222 | 0.950786998 | protein_coding | 3 | 51741086  | 51752629  | GRM2     |
| ENSG00000164086 | 9.061114416 | 8.289597152 | protein_coding | 3 | 52082935  | 52090566  | DUSP7    |
| ENSG00000164087 | 7.850461307 | 8.070120888 | protein_coding | 3 | 52109269  | 52188706  | POC1A    |
| ENSG00000164088 | 6.005279909 | 6.25865215  | protein_coding | 3 | 52279841  | 52284613  | PPM1M    |
| ENSG00000164089 | 0.499066092 | 0           | protein_coding | 4 | 109663196 | 109684210 | AGXT2L1  |
| ENSG00000164091 | 10.01839363 | 9.606743677 | protein_coding | 3 | 52288437  | 52322036  | WDR82    |
| ENSG00000164096 | 8.861502869 | 9.632407821 | protein_coding | 4 | 120218207 | 120225600 | C4orf3   |
| ENSG00000164099 | 3.393122761 | 0.697730409 | protein_coding | 4 | 119201193 | 119274158 | PRSS12   |
| ENSG00000164104 | 9.992287818 | 10.14071283 | protein_coding | 4 | 174252846 | 174256276 | HMGB2    |
| ENSG00000164105 | 7.049074049 | 8.188649093 | protein_coding | 4 | 174291120 | 174298683 | SAP30    |
| ENSG00000164106 | 0.499066092 | 1.667587519 | protein_coding | 4 | 174309299 | 174327531 | SCRG1    |
| ENSG00000164109 | 8.48251156  | 8.98660512  | protein_coding | 4 | 120980577 | 120988229 | MAD2L1   |
| ENSG00000164111 | 11.42405136 | 11.92742111 | protein_coding | 4 | 122589110 | 122618268 | ANXA5    |
| ENSG00000164114 | 7.514527001 | 8.613182984 | protein_coding | 4 | 156263810 | 156298122 | MAP9     |
| ENSG00000164116 | 0.499066092 | 3.232099092 | protein_coding | 4 | 156587863 | 156653501 | GUCY1A3  |

|                 |             |             |                |   |           |           |          |
|-----------------|-------------|-------------|----------------|---|-----------|-----------|----------|
| ENSG00000164117 | 6.462804234 | 6.827478203 | protein_coding | 4 | 175157809 | 175205415 | FBXO8    |
| ENSG00000164118 | 6.882196036 | 7.292770473 | protein_coding | 4 | 175204828 | 175254531 | CEP44    |
| ENSG00000164120 | 2.238690726 | 0.697730409 | protein_coding | 4 | 175411328 | 175444305 | HPGD     |
| ENSG00000164123 | 0           | 0.390640832 | protein_coding | 4 | 159814286 | 159959912 | C4orf45  |
| ENSG00000164124 | 5.977159882 | 5.751299057 | protein_coding | 4 | 159122756 | 159176563 | TMEM144  |
| ENSG00000164125 | 6.068837212 | 4.448594745 | protein_coding | 4 | 159045626 | 159094470 | FAM198B  |
| ENSG00000164128 | 0           | 0.697730409 | protein_coding | 4 | 164245113 | 164265984 | NPY1R    |
| ENSG00000164134 | 10.11134422 | 9.853651825 | protein_coding | 4 | 140222609 | 140341187 | NAA15    |
| ENSG00000164136 | 5.207774174 | 6.016808232 | protein_coding | 4 | 142557752 | 142655140 | IL15     |
| ENSG00000164142 | 7.007971391 | 6.742042315 | protein_coding | 4 | 152330368 | 152584784 | FAM160A1 |
| ENSG00000164144 | 8.560389515 | 8.884933592 | protein_coding | 4 | 153701089 | 153839615 | ARFIP1   |
| ENSG00000164151 | 10.31276107 | 10.11626465 | protein_coding | 5 | 5420777   | 5490347   | KIAA0947 |
| ENSG00000164162 | 5.360713447 | 5.583678991 | protein_coding | 4 | 145888264 | 146019693 | ANAPC10  |
| ENSG00000164163 | 10.25976259 | 10.28073536 | protein_coding | 4 | 146019084 | 146050331 | ABCE1    |
| ENSG00000164164 | 9.565576897 | 9.889095769 | protein_coding | 4 | 146031990 | 146101313 | OTUD4    |
| ENSG00000164167 | 6.704935538 | 7.154756319 | protein_coding | 4 | 147096837 | 147121152 | LSM6     |
| ENSG00000164168 | 8.079327701 | 8.055017786 | protein_coding | 4 | 148538534 | 148593195 | TMEM184C |
| ENSG00000164169 | 7.049074049 | 7.18590274  | protein_coding | 4 | 148558936 | 148605381 | PRMT10   |
| ENSG00000164171 | 10.07973621 | 8.997179425 | protein_coding | 5 | 52285156  | 52390609  | ITGA2    |
| ENSG00000164172 | 7.908691438 | 8.17939326  | protein_coding | 5 | 52391512  | 52405893  | MOCS2    |
| ENSG00000164176 | 9.91224858  | 6.775188634 | protein_coding | 5 | 83236373  | 83680611  | EDIL3    |
| ENSG00000164180 | 7.153278907 | 6.95589788  | protein_coding | 5 | 87485450  | 87565293  | TMEM161B |
| ENSG00000164181 | 3.211941663 | 2.579085888 | protein_coding | 5 | 60047618  | 60140216  | ELOVL7   |
| ENSG00000164182 | 8.079327701 | 8.496293532 | protein_coding | 5 | 60240956  | 60448853  | NDUFAF2  |
| ENSG00000164185 | 0.499066092 | 0.697730409 | protein_coding | 5 | 121465208 | 121515312 | ZNF474   |
| ENSG00000164187 | 8.13977083  | 7.883239271 | protein_coding | 5 | 36098514  | 36152063  | LMBRD2   |
| ENSG00000164188 | 0.499066092 | 1.667587519 | protein_coding | 5 | 36248536  | 36302216  | RANBP3L  |
| ENSG00000164190 | 10.5444047  | 10.40505707 | protein_coding | 5 | 36876861  | 37066515  | NIPBL    |
| ENSG00000164197 | 0.499066092 | 0           | protein_coding | 5 | 63461671  | 63668696  | RNF180   |
| ENSG00000164199 | 5.774228067 | 5.57429348  | protein_coding | 5 | 89825161  | 90460038  | GPR98    |
| ENSG00000164209 | 9.096400149 | 9.166009895 | protein_coding | 5 | 110073837 | 110100857 | SLC25A46 |
| ENSG00000164211 | 8.826469148 | 8.301022059 | protein_coding | 5 | 110831731 | 110848288 | STARD4   |
| ENSG00000164219 | 7.46813618  | 6.870289474 | protein_coding | 5 | 114546527 | 114598569 | PGGT1B   |
| ENSG00000164220 | 1.16343121  | 0.950786998 | protein_coding | 5 | 75911328  | 75919259  | F2RL2    |
| ENSG00000164221 | 7.007971391 | 6.376734172 | protein_coding | 5 | 114602885 | 114632528 | CCDC112  |
| ENSG00000164236 | 5.124761037 | 3.96493948  | protein_coding | 5 | 10564442  | 10650308  | ANKRD33B |
| ENSG00000164237 | 8.217949183 | 5.691786012 | protein_coding | 5 | 10275987  | 10308138  | CMBL     |
| ENSG00000164241 | 3.335220907 | 3.081239798 | protein_coding | 5 | 126378250 | 126409184 | C5orf63  |
| ENSG00000164244 | 9.560847829 | 9.376390077 | protein_coding | 5 | 126853301 | 126890782 | PRRC1    |
| ENSG00000164251 | 7.888702948 | 5.32851069  | protein_coding | 5 | 76114758  | 76131140  | F2RL1    |
| ENSG00000164252 | 8.518728184 | 8.351343215 | protein_coding | 5 | 76325076  | 76361059  | AGGF1    |
| ENSG00000164253 | 8.408986408 | 8.171634445 | protein_coding | 5 | 76721795  | 76916436  | WDR41    |
| ENSG00000164256 | 0.499066092 | 0           | protein_coding | 5 | 23507264  | 23528706  | PRDM9    |
| ENSG00000164258 | 7.67484765  | 8.122575449 | protein_coding | 5 | 52856463  | 52979168  | NDUFS4   |
| ENSG00000164265 | 0           | 0.697730409 | protein_coding | 5 | 147250245 | 147261754 | SCGB3A2  |
| ENSG00000164266 | 0.499066092 | 1.925536307 | protein_coding | 5 | 147204131 | 147211349 | SPINK1   |
| ENSG00000164284 | 7.689364157 | 7.743685008 | protein_coding | 5 | 148724993 | 148734146 | GRPEL2   |
| ENSG00000164287 | 0.499066092 | 0.390640832 | protein_coding | 5 | 54408799  | 54469005  | CDC20B   |
| ENSG00000164291 | 6.887241849 | 6.835357159 | protein_coding | 5 | 94890778  | 94940768  | ARSK     |
| ENSG00000164292 | 10.13221505 | 9.809336738 | protein_coding | 5 | 95049226  | 95160087  | RHOBTB3  |
| ENSG00000164294 | 8.992533411 | 9.268499153 | protein_coding | 5 | 54455946  | 54462899  | GPX8     |
| ENSG00000164296 | 5.417620896 | 5.620622115 | protein_coding | 5 | 149372681 | 149380730 | TIGD6    |
| ENSG00000164300 | 5.889353623 | 5.150490275 | protein_coding | 5 | 79407050  | 79551898  | SERINC5  |
| ENSG00000164303 | 2.928422289 | 4.101879561 | protein_coding | 4 | 185009859 | 185142383 | ENPP6    |
| ENSG00000164304 | 0.499066092 | 0.697730409 | protein_coding | 6 | 7326887   | 7389976   | CAGE1    |
| ENSG00000164305 | 8.109865782 | 8.758040301 | protein_coding | 4 | 185548850 | 185570663 | CASP3    |
| ENSG00000164306 | 6.35766608  | 6.877938671 | protein_coding | 4 | 185570767 | 185616117 | CCDC111  |
| ENSG00000164307 | 8.794597401 | 9.266315144 | protein_coding | 5 | 96096521  | 96143803  | ERAP1    |
| ENSG00000164308 | 9.882235894 | 9.430057217 | protein_coding | 5 | 96211643  | 96255420  | ERAP2    |
| ENSG00000164309 | 1.799000381 | 1.353254395 | protein_coding | 5 | 78985700  | 79096063  | CMYA5    |
| ENSG00000164323 | 8.944931872 | 9.179226353 | protein_coding | 4 | 186080819 | 186130658 | KIAA1430 |
| ENSG00000164327 | 9.902936511 | 9.705695541 | protein_coding | 5 | 38938021  | 39074510  | RICTOR   |
| ENSG00000164329 | 8.233881494 | 8.262094789 | protein_coding | 5 | 78907943  | 78982471  | PAPD4    |

|                 |             |             |                |   |           |           |           |
|-----------------|-------------|-------------|----------------|---|-----------|-----------|-----------|
| ENSG00000164330 | 0           | 0.950786998 | protein_coding | 5 | 158122924 | 158526788 | EBF1      |
| ENSG00000164331 | 5.977159882 | 6.403479675 | protein_coding | 5 | 72848160  | 72861511  | ANKRA2    |
| ENSG00000164332 | 7.943018447 | 7.969895325 | protein_coding | 5 | 158690089 | 158713044 | UBLCP1    |
| ENSG00000164338 | 8.193715877 | 7.960920138 | protein_coding | 5 | 72861268  | 72877794  | UTP15     |
| ENSG00000164342 | 6.35766608  | 6.535085617 | protein_coding | 4 | 186990306 | 187006255 | TLR3      |
| ENSG00000164344 | 0.499066092 | 2.501982735 | protein_coding | 4 | 187130133 | 187179625 | KLKB1     |
| ENSG00000164346 | 8.396654395 | 8.812940295 | protein_coding | 5 | 74062817  | 74072737  | NSA2      |
| ENSG00000164347 | 8.732871027 | 8.855210283 | protein_coding | 5 | 74017029  | 74063196  | GFM2      |
| ENSG00000164362 | 6.023726639 | 6.605885938 | protein_coding | 5 | 1253262   | 1295184   | TERT      |
| ENSG00000164363 | 0.499066092 | 0           | protein_coding | 5 | 1225470   | 1246304   | SLC6A18   |
| ENSG00000164366 | 7.827020104 | 8.379906558 | protein_coding | 5 | 204872    | 218330    | CCDC127   |
| ENSG00000164379 | 5.485736881 | 0           | protein_coding | 6 | 1312675   | 1314992   | FOXQ1     |
| ENSG00000164385 | 0.869158192 | 1.518964905 | protein_coding | 6 | 2622147   | 2634837   | C6orf195  |
| ENSG00000164393 | 1.799000381 | 0           | protein_coding | 6 | 47624172  | 47665533  | GPR111    |
| ENSG00000164398 | 0.869158192 | 0.950786998 | protein_coding | 5 | 131142683 | 131347936 | ACSL6     |
| ENSG00000164399 | 0           | 0.390640832 | protein_coding | 5 | 131396222 | 131398897 | IL3       |
| ENSG00000164400 | 7.169937448 | 8.487570409 | protein_coding | 5 | 131409483 | 131411859 | CSF2      |
| ENSG00000164402 | 9.216527094 | 9.240587696 | protein_coding | 5 | 132086509 | 132142933 | 8-sep     |
| ENSG00000164403 | 7.945439403 | 8.103127799 | protein_coding | 5 | 132157833 | 132166590 | SHROOM1   |
| ENSG00000164404 | 2.238690726 | 1.925536307 | protein_coding | 5 | 132196873 | 132202576 | GDF9      |
| ENSG00000164405 | 8.724437638 | 9.237617989 | protein_coding | 5 | 132202252 | 132203723 | UQCRQ     |
| ENSG00000164406 | 3.554067925 | 3.411459265 | protein_coding | 5 | 132208014 | 132210738 | LEAP2     |
| ENSG00000164411 | 4.689181911 | 4.917990497 | protein_coding | 6 | 87992696  | 88038996  | GJB7      |
| ENSG00000164414 | 5.967663407 | 6.009862691 | protein_coding | 6 | 88180341  | 88222054  | SLC35A1   |
| ENSG00000164418 | 5.090170488 | 5.57429348  | protein_coding | 6 | 101846664 | 102517958 | GRIK2     |
| ENSG00000164430 | 7.868433623 | 7.950075687 | protein_coding | 6 | 74123238  | 74161999  | MB21D1    |
| ENSG00000164442 | 9.168633912 | 8.855210283 | protein_coding | 6 | 139693393 | 139695757 | CITED2    |
| ENSG00000164463 | 6.050961887 | 6.703819132 | protein_coding | 5 | 172483355 | 172566291 | C5orf41   |
| ENSG00000164465 | 7.888702948 | 7.915187059 | protein_coding | 6 | 117774980 | 117891021 | DCBLD1    |
| ENSG00000164466 | 9.608983025 | 9.266315144 | protein_coding | 5 | 174904065 | 174956745 | SFXN1     |
| ENSG00000164485 | 0.499066092 | 1.518964905 | protein_coding | 6 | 137464968 | 137494785 | IL22RA2   |
| ENSG00000164494 | 7.565780433 | 7.20731193  | protein_coding | 6 | 107473761 | 107780768 | PDSS2     |
| ENSG00000164506 | 8.08373006  | 8.122575449 | protein_coding | 6 | 147525508 | 147708707 | STXBP5    |
| ENSG00000164509 | 6.372135143 | 5.09905904  | protein_coding | 5 | 55147207  | 55218678  | IL31RA    |
| ENSG00000164512 | 1.799000381 | 1.802319292 | protein_coding | 5 | 55395507  | 55529186  | ANKRD55   |
| ENSG00000164520 | 3.744048221 | 2.971122874 | protein_coding | 6 | 150204511 | 150219238 | RAET1E    |
| ENSG00000164530 | 2.57521082  | 1.353254395 | protein_coding | 6 | 36555311  | 36932613  | PI16      |
| ENSG00000164535 | 8.89695732  | 8.695567763 | protein_coding | 7 | 6448757   | 6523821   | DAGLB     |
| ENSG00000164542 | 7.345180517 | 7.423961341 | protein_coding | 7 | 36363830  | 36429734  | KIAA0895  |
| ENSG00000164543 | 9.867630505 | 9.516516751 | protein_coding | 7 | 43622357  | 43666385  | STK17A    |
| ENSG00000164548 | 9.006512903 | 9.258278703 | protein_coding | 7 | 23544399  | 23571660  | TRA2A     |
| ENSG00000164556 | 1.407729925 | 1.353254395 | protein_coding | 7 | 38724946  | 38726637  | FAM183B   |
| ENSG00000164574 | 10.77558713 | 10.43226174 | protein_coding | 5 | 153570290 | 153800544 | GALNT10   |
| ENSG00000164576 | 6.032862302 | 6.293387477 | protein_coding | 5 | 153825517 | 153835891 | SAP30L    |
| ENSG00000164587 | 11.66105046 | 12.35689303 | protein_coding | 5 | 149822753 | 149829319 | RPS14     |
| ENSG00000164588 | 0.499066092 | 0           | protein_coding | 5 | 45259349  | 45696253  | HCN1      |
| ENSG00000164591 | 1.799000381 | 1.667587519 | protein_coding | 5 | 150040436 | 150058927 | MYOZ3     |
| ENSG00000164597 | 9.058880138 | 8.606292299 | protein_coding | 7 | 106842189 | 107204959 | COG5      |
| ENSG00000164603 | 6.442380648 | 6.505763096 | protein_coding | 7 | 112459202 | 112579971 | C7orf60   |
| ENSG00000164609 | 8.362640485 | 8.516036237 | protein_coding | 5 | 159828648 | 159848718 | SLU7      |
| ENSG00000164610 | 5.684325135 | 5.840125386 | protein_coding | 7 | 33134409  | 33149013  | RP9       |
| ENSG00000164611 | 8.450484798 | 8.916844293 | protein_coding | 5 | 159848829 | 159855748 | PTTG1     |
| ENSG00000164615 | 8.059349131 | 8.203944731 | protein_coding | 5 | 134074191 | 134087847 | CAMLG     |
| ENSG00000164619 | 6.541724534 | 3.96493948  | protein_coding | 7 | 33944523  | 34195484  | BMPER     |
| ENSG00000164620 | 5.538004898 | 4.826083323 | protein_coding | 5 | 141016517 | 141020644 | RELL2     |
| ENSG00000164621 | 0.499066092 | 0.950786998 | antisense      | 5 | 135465196 | 135470579 | SMAD5-AS1 |
| ENSG00000164626 | 8.309127368 | 7.20731193  | protein_coding | 6 | 39156749  | 39197226  | KCNK5     |
| ENSG00000164627 | 1.616589159 | 0.950786998 | protein_coding | 6 | 39297766  | 39693181  | KIF6      |
| ENSG00000164631 | 8.135536446 | 7.996490656 | protein_coding | 7 | 6728064   | 6746620   | ZNF12     |
| ENSG00000164638 | 6.379315619 | 4.961837817 | protein_coding | 7 | 5314000   | 5343696   | SLC29A4   |
| ENSG00000164647 | 7.627388205 | 7.772696723 | protein_coding | 7 | 89783689  | 89794143  | STEAP1    |
| ENSG00000164649 | 9.465390183 | 9.153459292 | protein_coding | 7 | 21940518  | 21985702  | CDCA7L    |
| ENSG00000164651 | 3.698846687 | 2.721932731 | protein_coding | 7 | 20821903  | 20826505  | SP8       |

|                 |             |             |                |    |           |           |           |
|-----------------|-------------|-------------|----------------|----|-----------|-----------|-----------|
| ENSG00000164654 | 8.672775055 | 8.635917101 | protein_coding | 7  | 7606503   | 7648560   | MIOS      |
| ENSG00000164659 | 0           | 0.390640832 | protein_coding | 7  | 86506222  | 86689015  | KIAA1324L |
| ENSG00000164663 | 6.138202758 | 6.637773454 | protein_coding | 6  | 41762107  | 41863099  | UAP49     |
| ENSG00000164669 | 1.960915222 | 2.652276565 | pseudogene     | 7  | 64601603  | 64694600  | INTS4L1   |
| ENSG00000164674 | 6.442380648 | 4.566889334 | protein_coding | 6  | 159071046 | 159185908 | SYTL3     |
| ENSG00000164675 | 1.16343121  | 0.950786998 | protein_coding | 7  | 123092454 | 123175131 | IQUB      |
| ENSG00000164683 | 3.077135474 | 4.075511708 | protein_coding | 8  | 80676245  | 80680098  | HEY1      |
| ENSG00000164684 | 4.437288965 | 6.941369681 | protein_coding | 8  | 81540686  | 81787016  | ZNF704    |
| ENSG00000164687 | 4.19837882  | 5.236305879 | protein_coding | 8  | 82192598  | 82197012  | FABP5     |
| ENSG00000164690 | 3.78787645  | 3.232099092 | protein_coding | 7  | 155592680 | 155604967 | SHH       |
| ENSG00000164691 | 1.407729925 | 1.518964905 | protein_coding | 6  | 159455500 | 159466184 | TAGAP     |
| ENSG00000164692 | 11.5729824  | 8.874456566 | protein_coding | 7  | 94023873  | 94060544  | COL1A2    |
| ENSG00000164694 | 0           | 0.390640832 | protein_coding | 6  | 159590429 | 159693141 | FNDC1     |
| ENSG00000164695 | 6.835971536 | 5.317302248 | protein_coding | 8  | 82644669  | 82671750  | CHMP4C    |
| ENSG00000164707 | 4.75690578  | 4.810179682 | protein_coding | 7  | 135365985 | 135412952 | SLC13A4   |
| ENSG00000164713 | 9.684112495 | 9.558175629 | protein_coding | 7  | 97881691  | 97922275  | BRI3      |
| ENSG00000164715 | 9.51676008  | 8.599368544 | protein_coding | 7  | 97736197  | 97838945  | LMTK2     |
| ENSG00000164729 | 0.499066092 | 1.353254395 | protein_coding | 17 | 33519539  | 33521412  | SLC35G3   |
| ENSG00000164733 | 11.80913707 | 12.50139115 | protein_coding | 8  | 11700033  | 11726957  | CTSB      |
| ENSG00000164741 | 9.186141067 | 8.522150834 | protein_coding | 8  | 12940870  | 13373167  | DLC1      |
| ENSG00000164742 | 0           | 0.697730409 | protein_coding | 7  | 45613739  | 45762715  | ADCY1     |
| ENSG00000164744 | 5.741167503 | 6.316088276 | protein_coding | 7  | 48026745  | 48068716  | SUN3      |
| ENSG00000164746 | 2.762599152 | 1.518964905 | protein_coding | 7  | 48075108  | 48100901  | C7orf57   |
| ENSG00000164749 | 1.16343121  | 2.242360793 | protein_coding | 8  | 76320149  | 76479078  | HNF4G     |
| ENSG00000164751 | 8.241782151 | 8.312357201 | protein_coding | 8  | 77892494  | 77913280  | PEX2      |
| ENSG00000164754 | 10.80120923 | 10.6252633  | protein_coding | 8  | 117858174 | 117887105 | RAD21     |
| ENSG00000164758 | 6.103936836 | 5.988823159 | protein_coding | 8  | 118532952 | 118552501 | MED30     |
| ENSG00000164761 | 4.923348194 | 5.306006045 | protein_coding | 8  | 119935796 | 119964439 | TNFRSF11B |
| ENSG00000164764 | 3.274897671 | 2.851901313 | protein_coding | 8  | 73976775  | 74036323  | C8orf84   |
| ENSG00000164776 | 4.409500985 | 3.906303962 | protein_coding | 7  | 56148440  | 56160689  | PHKG1     |
| ENSG00000164778 | 6.146643566 | 5.974624386 | protein_coding | 7  | 155250824 | 155257526 | EN2       |
| ENSG00000164808 | 8.235860718 | 8.496293532 | protein_coding | 8  | 48173167  | 48648868  | KIAA0146  |
| ENSG00000164815 | 7.651313074 | 7.902117654 | protein_coding | 7  | 103766788 | 103848495 | ORC5      |
| ENSG00000164818 | 10.15488184 | 9.775951422 | protein_coding | 7  | 766338    | 829190    | HEATR2    |
| ENSG00000164821 | 0.499066092 | 0           | protein_coding | 8  | 6793344   | 6795860   | DEFA4     |
| ENSG00000164823 | 8.072698871 | 7.600774083 | protein_coding | 8  | 90914087  | 90940116  | OSGIN2    |
| ENSG00000164825 | 1.16343121  | 0           | protein_coding | 8  | 6728097   | 6735544   | DEFB1     |
| ENSG00000164828 | 10.90902113 | 10.61242459 | protein_coding | 7  | 855528    | 936072    | SUN1      |
| ENSG00000164830 | 8.016241092 | 7.951888765 | protein_coding | 8  | 107282473 | 107764922 | OXR1      |
| ENSG00000164845 | 2.35979773  | 2.144285137 | pseudogene     | 12 | 8385108   | 8395544   | FAM86FP   |
| ENSG00000164849 | 2.671945279 | 3.532712221 | protein_coding | 7  | 1084212   | 1098897   | GPR146    |
| ENSG00000164850 | 7.053569556 | 7.073814954 | protein_coding | 7  | 1121844   | 1133451   | GPBR      |
| ENSG00000164855 | 7.062518763 | 6.097646709 | protein_coding | 7  | 1585796   | 1600457   | TMEM184A  |
| ENSG00000164867 | 7.030950614 | 7.192052139 | protein_coding | 7  | 150688083 | 150711676 | NOS3      |
| ENSG00000164877 | 10.05584741 | 10.05727354 | protein_coding | 7  | 1468101   | 1499138   | MICALL2   |
| ENSG00000164879 | 0           | 1.518964905 | protein_coding | 8  | 86285665  | 86361269  | CA3       |
| ENSG00000164880 | 11.92973808 | 11.46115805 | protein_coding | 7  | 1509913   | 1545489   | INTS1     |
| ENSG00000164885 | 7.413224588 | 7.529716161 | protein_coding | 7  | 150750899 | 150755617 | CDK5      |
| ENSG00000164889 | 11.24524063 | 11.37661838 | protein_coding | 7  | 150754297 | 150773614 | SLC4A2    |
| ENSG00000164896 | 9.805686507 | 9.491804167 | protein_coding | 7  | 150773679 | 150777953 | FASTK     |
| ENSG00000164897 | 8.871721931 | 8.535512415 | protein_coding | 7  | 150778167 | 150780633 | TMUB1     |
| ENSG00000164898 | 4.131913373 | 4.7279204   | protein_coding | 7  | 139024203 | 139031065 | C7orf55   |
| ENSG00000164900 | 4.19837882  | 5.283144778 | protein_coding | 7  | 150845676 | 150871832 | GBX1      |
| ENSG00000164902 | 8.389559911 | 8.363653959 | protein_coding | 5  | 125935960 | 125962944 | PHAX      |
| ENSG00000164904 | 8.809292739 | 8.908465794 | protein_coding | 5  | 125877533 | 125931110 | ALDH7A1   |
| ENSG00000164916 | 11.24007313 | 10.22484723 | protein_coding | 7  | 4683388   | 4811074   | FOKK1     |
| ENSG00000164919 | 8.698837588 | 9.119178324 | protein_coding | 8  | 100885428 | 100906290 | COX6C     |
| ENSG00000164920 | 4.75690578  | 3.781359661 | protein_coding | 8  | 99956631  | 99964332  | OSR2      |
| ENSG00000164924 | 12.66331162 | 11.96942156 | protein_coding | 8  | 101928753 | 101965616 | YWHAZ     |
| ENSG00000164929 | 0           | 1.353254395 | protein_coding | 8  | 104152938 | 104242533 | BAALC     |
| ENSG00000164930 | 8.605481314 | 8.786767612 | protein_coding | 8  | 104310661 | 104345094 | FZD6      |
| ENSG00000164932 | 7.81647827  | 8.898158883 | protein_coding | 8  | 104383743 | 104395225 | CTHRC1    |
| ENSG00000164933 | 8.536501169 | 8.043160634 | protein_coding | 8  | 104410863 | 104427417 | SLC25A32  |

|                 |             |             |                |   |           |           |           |
|-----------------|-------------|-------------|----------------|---|-----------|-----------|-----------|
| ENSG00000164934 | 9.368588363 | 9.079094423 | protein_coding | 8 | 104426942 | 104455681 | DCAF13    |
| ENSG00000164938 | 5.223818625 | 5.893930351 | protein_coding | 8 | 95938200  | 95961639  | TP53INP1  |
| ENSG00000164941 | 8.641761486 | 8.402622096 | protein_coding | 8 | 95825539  | 95893974  | INTS8     |
| ENSG00000164944 | 9.541775001 | 9.381107599 | protein_coding | 8 | 95499921  | 95565757  | KIAA1429  |
| ENSG00000164946 | 4.543379137 | 7.100213554 | protein_coding | 9 | 14734664  | 14910993  | FREM1     |
| ENSG00000164949 | 5.637181576 | 4.319727133 | protein_coding | 8 | 95261481  | 95274578  | GEM       |
| ENSG00000164951 | 10.81616846 | 10.22709487 | protein_coding | 8 | 94870035  | 94938294  | PDP1      |
| ENSG00000164953 | 6.998676229 | 6.480864016 | protein_coding | 8 | 94767072  | 94831462  | TMEM67    |
| ENSG00000164961 | 9.072234198 | 9.056522014 | protein_coding | 8 | 126036502 | 126104082 | KIAA0196  |
| ENSG00000164967 | 6.704935538 | 7.326703453 | protein_coding | 9 | 34610483  | 34612101  | C9orf23   |
| ENSG00000164970 | 9.265790136 | 9.636922921 | protein_coding | 9 | 34398182  | 34458568  | C9orf25   |
| ENSG00000164972 | 1.799000381 | 1.16600992  | protein_coding | 9 | 34379017  | 34397830  | C9orf24   |
| ENSG00000164975 | 7.071412799 | 7.033288635 | protein_coding | 9 | 15422702  | 15465951  | SNAPC3    |
| ENSG00000164976 | 6.579622637 | 5.908941696 | protein_coding | 9 | 34366668  | 34376851  | KIAA1161  |
| ENSG00000164978 | 6.535310252 | 6.874119142 | protein_coding | 9 | 34329504  | 34343709  | NUDT2     |
| ENSG00000164983 | 7.737655476 | 7.836897019 | protein_coding | 8 | 125324231 | 125384933 | TMEM65    |
| ENSG00000164985 | 8.504022011 | 8.712778563 | protein_coding | 9 | 15464064  | 15511017  | PSIP1     |
| ENSG00000164989 | 3.335220907 | 4.385599336 | protein_coding | 9 | 15552895  | 16061661  | C9orf93   |
| ENSG00000165006 | 9.142495894 | 8.846464976 | protein_coding | 9 | 34179003  | 34252521  | UBAP1     |
| ENSG00000165025 | 6.050961887 | 0           | protein_coding | 9 | 93564069  | 93660831  | SYK       |
| ENSG00000165028 | 3.335220907 | 3.027231696 | protein_coding | 9 | 107526438 | 107539738 | NIPSNAP3B |
| ENSG00000165029 | 9.680483837 | 9.574743444 | protein_coding | 9 | 107543283 | 107690518 | ABCA1     |
| ENSG00000165030 | 8.518728184 | 8.605140645 | protein_coding | 9 | 94171327  | 94186144  | NFIL3     |
| ENSG00000165046 | 6.435508026 | 6.136428444 | protein_coding | 8 | 38243725  | 38267045  | LETM2     |
| ENSG00000165055 | 8.619193517 | 8.130601896 | protein_coding | 7 | 128095894 | 128146656 | METTL2B   |
| ENSG00000165059 | 0.499066092 | 0           | protein_coding | 9 | 71627469  | 71629039  | PRKACG    |
| ENSG00000165060 | 7.878603882 | 8.32500368  | protein_coding | 9 | 71650175  | 71715094  | FXN       |
| ENSG00000165072 | 5.512107582 | 1.925536307 | protein_coding | 9 | 72658497  | 72841887  | MAMDC2    |
| ENSG00000165076 | 0           | 0.390640832 | protein_coding | 7 | 141536086 | 141541286 | PRSS37    |
| ENSG00000165078 | 0.499066092 | 0           | protein_coding | 8 | 68334360  | 68658620  | CPA6      |
| ENSG00000165084 | 0.499066092 | 0           | protein_coding | 8 | 69242957  | 69731257  | C8orf34   |
| ENSG00000165091 | 1.960915222 | 0.390640832 | protein_coding | 9 | 75136717  | 75455695  | TMC1      |
| ENSG00000165092 | 1.16343121  | 0           | protein_coding | 9 | 75515578  | 75695358  | ALDH1A1   |
| ENSG00000165097 | 8.583888749 | 8.262094789 | protein_coding | 6 | 18155560  | 18224084  | KDM1B     |
| ENSG00000165102 | 8.847332411 | 9.339469783 | protein_coding | 8 | 42995556  | 43057998  | HGSNAT    |
| ENSG00000165105 | 7.781675404 | 8.14810445  | protein_coding | 9 | 85594500  | 85678092  | RASEF     |
| ENSG00000165113 | 4.464551814 | 5.683080141 | protein_coding | 9 | 86354336  | 86444431  | GKAP1     |
| ENSG00000165115 | 4.981125677 | 5.824376633 | protein_coding | 9 | 86451613  | 86536342  | KIF27     |
| ENSG00000165118 | 8.183497283 | 7.73107057  | protein_coding | 9 | 86553226  | 86571901  | C9orf64   |
| ENSG00000165119 | 12.47317791 | 12.40135916 | protein_coding | 9 | 86582998  | 86595569  | HNRNPK    |
| ENSG00000165120 | 0           | 0.390640832 | protein_coding | 7 | 129847700 | 129856683 | C7orf45   |
| ENSG00000165121 | 3.004694206 | 4.319727133 | pseudogene     | 9 | 88430881  | 88464426  |           |
| ENSG00000165124 | 4.464551814 | 4.101879561 | protein_coding | 9 | 113127531 | 113342160 | SVEP1     |
| ENSG00000165131 | 0           | 0.697730409 | protein_coding | 7 | 142636440 | 142637955 | C7orf34   |
| ENSG00000165138 | 9.875269153 | 9.547423533 | protein_coding | 9 | 101493611 | 101559247 | ANKS6     |
| ENSG00000165140 | 5.458875168 | 2.971122874 | protein_coding | 9 | 97365415  | 97402531  | FBP1      |
| ENSG00000165156 | 8.349904097 | 8.247406493 | protein_coding | 8 | 124260697 | 124287781 | ZHX1      |
| ENSG00000165169 | 7.813830732 | 8.159132889 | protein_coding | X | 37696010  | 37706890  | DYNLT3    |
| ENSG00000165171 | 3.698846687 | 4.319727133 | protein_coding | 7 | 73248920  | 73256865  | WBSCR27   |
| ENSG00000165175 | 9.979941537 | 10.09468113 | protein_coding | X | 38660685  | 38665790  | MID1IP1   |
| ENSG00000165178 | 0.499066092 | 0           | pseudogene     | 7 | 74572445  | 74587848  | NCF1C     |
| ENSG00000165181 | 8.56354495  | 8.675956977 | protein_coding | 9 | 114448453 | 114557288 | C9orf84   |
| ENSG00000165182 | 1.16343121  | 0.390640832 | protein_coding | X | 23925918  | 23957624  | CXorf58   |
| ENSG00000165185 | 7.474855471 | 7.381542895 | protein_coding | 9 | 115249127 | 115431677 | KIAA1958  |
| ENSG00000165188 | 0.499066092 | 0           | protein_coding | 9 | 116059480 | 116065656 | RNF183    |
| ENSG00000165194 | 0.499066092 | 1.16600992  | protein_coding | X | 99546642  | 99665271  | PCDH19    |
| ENSG00000165195 | 7.395627075 | 7.701200733 | protein_coding | X | 15337573  | 15353676  | PIGA      |
| ENSG00000165197 | 0.869158192 | 1.518964905 | protein_coding | X | 15363713  | 15402498  | FIGF      |
| ENSG00000165209 | 8.681514984 | 8.480051236 | protein_coding | 9 | 125871779 | 126030855 | STRBP     |
| ENSG00000165215 | 5.270908378 | 4.127774132 | protein_coding | 7 | 73183328  | 73184600  | CLDN3     |
| ENSG00000165219 | 10.27042264 | 9.94751216  | protein_coding | 9 | 128024073 | 128129486 | GAPVD1    |
| ENSG00000165233 | 7.878603882 | 7.487839978 | protein_coding | 9 | 95858500  | 95875565  | C9orf89   |
| ENSG00000165238 | 6.681890601 | 4.202780776 | protein_coding | 9 | 95947198  | 96082854  | WNK2      |

|                 |             |             |                |   |    |           |           |          |
|-----------------|-------------|-------------|----------------|---|----|-----------|-----------|----------|
| ENSG00000165240 | 6.721980839 | 7.434373903 | protein_coding | X |    | 77166194  | 77305892  | ATP7A    |
| ENSG00000165244 | 7.95748362  | 7.858322159 | protein_coding |   | 9  | 99148223  | 99180611  | ZNF367   |
| ENSG00000165259 | 4.75690578  | 5.901455548 | protein_coding | X |    | 83572882  | 83757487  | HDX      |
| ENSG00000165264 | 8.016241092 | 8.83570377  | protein_coding |   | 9  | 32552997  | 32573160  | NDUFB6   |
| ENSG00000165269 | 1.407729925 | 0.697730409 | protein_coding |   | 9  | 33384765  | 33402643  | AQP7     |
| ENSG00000165271 | 10.2558666  | 10.11464692 | protein_coding |   | 9  | 33461439  | 33473941  | NOL6     |
| ENSG00000165272 | 7.803191723 | 7.284161038 | protein_coding |   | 9  | 33441152  | 33447609  | AQP3     |
| ENSG00000165275 | 6.350376764 | 6.198834244 | protein_coding |   | 9  | 37753804  | 37778969  | RG9MTD3  |
| ENSG00000165280 | 12.04088917 | 11.93339824 | protein_coding |   | 9  | 35056061  | 35073246  | VCP      |
| ENSG00000165282 | 7.883662252 | 8.109639521 | protein_coding |   | 9  | 35088685  | 35096591  | PIGO     |
| ENSG00000165283 | 9.855452651 | 10.22372209 | protein_coding |   | 9  | 35099888  | 35103154  | STOML2   |
| ENSG00000165288 | 8.492479328 | 8.503728743 | protein_coding | X |    | 79926353  | 80065187  | BRWD3    |
| ENSG00000165300 | 1.16343121  | 4.075511708 | protein_coding |   | 13 | 88324870  | 88331868  | SLITRK5  |
| ENSG00000165304 | 9.132969064 | 9.275755399 | protein_coding |   | 9  | 36572859  | 36677678  | MELK     |
| ENSG00000165309 | 3.698846687 | 1.16600992  | protein_coding |   | 10 | 23216953  | 23326518  | ARMC3    |
| ENSG00000165312 | 8.571403474 | 7.598461017 | protein_coding |   | 10 | 23728198  | 23731308  | OTUD1    |
| ENSG00000165322 | 8.518728184 | 9.327648427 | protein_coding |   | 10 | 32094365  | 32217742  | ARHGAP12 |
| ENSG00000165325 | 0           | 0.390640832 | protein_coding |   | 11 | 93063137  | 93171653  | CCDC67   |
| ENSG00000165338 | 6.598204782 | 7.298481685 | protein_coding |   | 10 | 93170096  | 93274586  | HECTD2   |
| ENSG00000165355 | 7.471499737 | 7.619146302 | protein_coding |   | 14 | 39866873  | 39901704  | FBXO33   |
| ENSG00000165359 | 6.462804234 | 7.439552137 | protein_coding | X |    | 134654584 | 134716435 | DDX26B   |
| ENSG00000165376 | 3.335220907 | 2.420525079 | protein_coding | X |    | 106143394 | 106174091 | CLDN2    |
| ENSG00000165388 | 5.929039784 | 3.679994897 | protein_coding |   | 10 | 48355024  | 48373866  | ZNF488   |
| ENSG00000165389 | 8.438503912 | 9.014632836 | protein_coding |   | 14 | 34901995  | 34931562  | SPTSSA   |
| ENSG00000165392 | 8.032273249 | 8.076782959 | protein_coding |   | 8  | 30891317  | 31031285  | WRN      |
| ENSG00000165406 | 8.605481314 | 8.114504097 | protein_coding |   | 10 | 45950035  | 46090354  | 8-Mar    |
| ENSG00000165409 | 0.499066092 | 1.16600992  | protein_coding |   | 14 | 81421333  | 81612646  | TSHR     |
| ENSG00000165410 | 9.003030709 | 9.370979666 | protein_coding |   | 14 | 35179593  | 35184029  | CFL2     |
| ENSG00000165416 | 8.116326397 | 7.568048738 | protein_coding |   | 13 | 53226844  | 53262433  | SUGT1    |
| ENSG00000165417 | 9.112647868 | 8.954409067 | protein_coding |   | 14 | 81641796  | 81687721  | GTF2A1   |
| ENSG00000165424 | 7.720795447 | 7.237355663 | protein_coding |   | 10 | 81142081  | 81205383  | ZCCHC24  |
| ENSG00000165434 | 8.730065371 | 9.001562612 | protein_coding |   | 11 | 74041363  | 74109518  | PGM2L1   |
| ENSG00000165443 | 0.499066092 | 0           | protein_coding |   | 10 | 60936350  | 61007534  | PHYHIP1L |
| ENSG00000165449 | 6.94645393  | 5.974624386 | protein_coding |   | 10 | 61410523  | 61495760  | SLC16A9  |
| ENSG00000165458 | 10.80421351 | 10.82816062 | protein_coding |   | 11 | 71934745  | 71950149  | INPPL1   |
| ENSG00000165474 | 6.482942724 | 4.406904905 | protein_coding |   | 13 | 20761609  | 20767037  | GJB2     |
| ENSG00000165475 | 6.585843317 | 7.00911166  | protein_coding |   | 13 | 20977806  | 21099996  | CRYL1    |
| ENSG00000165476 | 8.813274715 | 8.206984494 | protein_coding |   | 10 | 65281123  | 65384883  | REEP3    |
| ENSG00000165478 | 1.407729925 | 0.390640832 | protein_coding |   | 11 | 124789089 | 124806308 | HEPACAM  |
| ENSG00000165480 | 8.732871027 | 8.736113084 | protein_coding |   | 13 | 21727734  | 21750741  | SKA3     |
| ENSG00000165487 | 8.173205795 | 8.397309351 | protein_coding |   | 13 | 22066836  | 22178353  | EFHA1    |
| ENSG00000165490 | 8.508940744 | 8.65607594  | protein_coding |   | 11 | 82611017  | 82669319  | C11orf82 |
| ENSG00000165494 | 9.021506037 | 9.233151934 | protein_coding |   | 11 | 82868030  | 82898493  | PCF11    |
| ENSG00000165495 | 0           | 1.353254395 | protein_coding |   | 11 | 125034583 | 125303285 | PKNOX2   |
| ENSG00000165496 | 0.499066092 | 0.697730409 | protein_coding |   | 14 | 47120222  | 47121028  | RPL10L   |
| ENSG00000165501 | 7.587643674 | 7.933654619 | protein_coding |   | 14 | 50065415  | 50081390  | LRR1     |
| ENSG00000165502 | 9.752069226 | 10.38540204 | protein_coding |   | 14 | 50085237  | 50087403  | RPL36AL  |
| ENSG00000165506 | 7.345180517 | 7.825075067 | protein_coding |   | 14 | 50091892  | 50101948  | DNAAF2   |
| ENSG00000165507 | 8.391336806 | 8.926097022 | protein_coding |   | 10 | 45466429  | 45474258  | C10orf10 |
| ENSG00000165509 | 0           | 0.390640832 | protein_coding | X |    | 140926102 | 140985618 | MAGEC3   |
| ENSG00000165511 | 2.847891871 | 1.353254395 | protein_coding |   | 10 | 45493146  | 45496336  | C10orf25 |
| ENSG00000165512 | 5.858855738 | 6.16171561  | protein_coding |   | 10 | 45495923  | 45500774  | ZNF22    |
| ENSG00000165516 | 8.018542337 | 9.113519788 | protein_coding |   | 14 | 50234326  | 50249909  | KLHDC2   |
| ENSG00000165521 | 7.35977471  | 7.439552137 | protein_coding |   | 14 | 89078775  | 89259096  | EML5     |
| ENSG00000165525 | 8.959377969 | 9.351881826 | protein_coding |   | 14 | 50249997  | 50319921  | NEMF     |
| ENSG00000165526 | 8.377059993 | 8.667154767 | protein_coding |   | 11 | 126071993 | 126081587 | RPUSD4   |
| ENSG00000165527 | 10.39919165 | 10.21996528 | protein_coding |   | 14 | 50359810  | 50361490  | ARF6     |
| ENSG00000165533 | 8.727254249 | 8.52337065  | protein_coding |   | 14 | 89290497  | 89344335  | TTC8     |
| ENSG00000165548 | 4.097495944 | 3.183544561 | protein_coding |   | 14 | 77582911  | 77725838  | TMEM63C  |
| ENSG00000165555 | 4.062237333 | 4.917990497 | protein_coding |   | 14 | 77860364  | 77889860  | NOXRED1  |
| ENSG00000165568 | 6.965663283 | 6.174194902 | protein_coding |   | 10 | 4828820   | 4890254   | AKR1E2   |
| ENSG00000165572 | 6.979904289 | 6.365895578 | protein_coding |   | 13 | 41701705  | 41706882  | KBTBD6   |
| ENSG00000165591 | 3.274897671 | 2.039052734 | protein_coding | X |    | 57313139  | 57515629  | FAAH2    |

|                 |             |              |                |    |           |           |           |
|-----------------|-------------|--------------|----------------|----|-----------|-----------|-----------|
| ENSG00000165606 | 1.799000381 | 0            | protein_coding | 10 | 50572237  | 50603986  | DRGX      |
| ENSG00000165609 | 9.59671396  | 9.130429247  | protein_coding | 10 | 12207324  | 12238143  | NUDT5     |
| ENSG00000165617 | 0.499066092 | 1.353254395  | protein_coding | 14 | 59100685  | 59115039  | DACT1     |
| ENSG00000165626 | 5.827699195 | 4.990346085  | protein_coding | 10 | 13480484  | 13570974  | BEND7     |
| ENSG00000165629 | 10.19511088 | 10.260761174 | protein_coding | 10 | 7830092   | 7849778   | ATP5C1    |
| ENSG00000165630 | 7.169937448 | 6.775188634  | protein_coding | 10 | 13628927  | 13672868  | PRPF18    |
| ENSG00000165632 | 7.530740159 | 7.132546694  | protein_coding | 10 | 7860467   | 8058590   | TAF3      |
| ENSG00000165637 | 8.697401955 | 8.373156878  | protein_coding | 10 | 76969912  | 76991206  | VDAC2     |
| ENSG00000165644 | 7.692250012 | 7.260948155  | protein_coding | 10 | 76993414  | 76995788  | COMTD1    |
| ENSG00000165646 | 7.030950614 | 6.708116507  | protein_coding | 10 | 119000604 | 119038941 | SLC18A2   |
| ENSG00000165650 | 9.942255804 | 9.672543867  | protein_coding | 10 | 119040000 | 119134978 | PDZD8     |
| ENSG00000165655 | 4.322773689 | 6.130036786  | protein_coding | 10 | 77039484  | 77161664  | ZNF503    |
| ENSG00000165660 | 8.094677541 | 8.127396674  | protein_coding | 10 | 126490354 | 126525239 | FAM175B   |
| ENSG00000165661 | 9.950715896 | 9.924613326  | protein_coding | 9  | 139098179 | 139137687 | QSOX2     |
| ENSG00000165669 | 8.129161475 | 8.458531597  | protein_coding | 10 | 120065401 | 120101840 | FAM204A   |
| ENSG00000165671 | 9.977577838 | 9.797285822  | protein_coding | 5  | 176560026 | 176727216 | NSD1      |
| ENSG00000165672 | 10.74776895 | 11.03943311  | protein_coding | 10 | 120927215 | 120938345 | PRDX3     |
| ENSG00000165675 | 8.072698871 | 7.999999944  | protein_coding | X  | 129751713 | 130037208 | ENOX2     |
| ENSG00000165678 | 11.03428274 | 11.36084034  | protein_coding | 10 | 85899196  | 85913311  | GHITM     |
| ENSG00000165684 | 9.909151231 | 9.741775201  | protein_coding | 9  | 139270029 | 139293249 | SNAPC4    |
| ENSG00000165685 | 8.027710784 | 7.572769481  | protein_coding | 12 | 10323141  | 10344400  | C12orf59  |
| ENSG00000165688 | 10.16166506 | 10.14824399  | protein_coding | 9  | 139305110 | 139318213 | PMPCA     |
| ENSG00000165689 | 10.31650661 | 9.921840881  | protein_coding | 9  | 139296377 | 139305061 | SDCCAG3   |
| ENSG00000165695 | 4.352265886 | 3.748356452  | protein_coding | 9  | 135600965 | 135754164 | AK8       |
| ENSG00000165698 | 5.707331524 | 5.734544355  | protein_coding | 9  | 135753414 | 135765588 | C9orf9    |
| ENSG00000165699 | 9.158235462 | 9.214393111  | protein_coding | 9  | 135766735 | 135820020 | TSC1      |
| ENSG00000165704 | 9.825536602 | 9.885305703  | protein_coding | X  | 133594183 | 133654543 | HPRT1     |
| ENSG00000165714 | 5.752272083 | 6.198834244  | protein_coding | 12 | 12510013  | 12619840  | LOH12CR1  |
| ENSG00000165716 | 4.517578978 | 4.7279204    | protein_coding | 9  | 139607022 | 139618502 | FAM69B    |
| ENSG00000165724 | 8.549290825 | 8.69988975   | protein_coding | 9  | 140476531 | 140484942 | ZMYND19   |
| ENSG00000165730 | 4.097495944 | 4.226940739  | protein_coding | 10 | 70587298  | 70655188  | STOX1     |
| ENSG00000165732 | 11.89038555 | 11.47414795  | protein_coding | 10 | 70715884  | 70744829  | DDX21     |
| ENSG00000165733 | 10.19866692 | 9.748049581  | protein_coding | 10 | 43278249  | 43326856  | BMS1      |
| ENSG00000165752 | 9.108333003 | 9.176127473  | protein_coding | 10 | 134020994 | 134145353 | STK32C    |
| ENSG00000165757 | 10.71798852 | 9.623903733  | protein_coding | 10 | 30301729  | 30404423  | KIAA1462  |
| ENSG00000165775 | 8.602416377 | 9.423538659  | protein_coding | X  | 154254255 | 154288578 | FUNDC2    |
| ENSG00000165782 | 8.235860718 | 8.570156468  | protein_coding | 14 | 20925878  | 20929771  | TMEM55B   |
| ENSG00000165792 | 8.561968095 | 9.274307066  | protein_coding | 14 | 21457929  | 21465189  | METTLL17  |
| ENSG00000165795 | 5.223818625 | 4.640685763  | protein_coding | 14 | 21484922  | 21539031  | NDRG2     |
| ENSG00000165799 | 1.407729925 | 0.950786998  | protein_coding | 14 | 21510385  | 21512393  | RNASE7    |
| ENSG00000165801 | 8.974866377 | 9.224178134  | protein_coding | 14 | 21538429  | 21558399  | ARHGEF40  |
| ENSG00000165802 | 11.22371086 | 11.00688187  | protein_coding | 9  | 140342022 | 140353786 | NELF      |
| ENSG00000165804 | 6.846372398 | 7.289906366  | protein_coding | 14 | 21558205  | 21572881  | ZNF219    |
| ENSG00000165805 | 0.869158192 | 0.950786998  | protein_coding | 12 | 88373816  | 88427814  | C12orf50  |
| ENSG00000165806 | 8.164919416 | 8.599368544  | protein_coding | 10 | 115438942 | 115490662 | CASP7     |
| ENSG00000165807 | 1.16343121  | 2.420525079  | protein_coding | 14 | 65016620  | 65056098  | PPP1R36   |
| ENSG00000165813 | 7.627388205 | 7.737391576  | protein_coding | 10 | 115880621 | 115933979 | C10orf118 |
| ENSG00000165816 | 0.499066092 | 0            | protein_coding | 10 | 115999089 | 116051272 | VWA2      |
| ENSG00000165819 | 8.697401955 | 9.193089524  | protein_coding | 14 | 21966191  | 21979517  | METTLL3   |
| ENSG00000165821 | 3.146112541 | 2.652276565  | protein_coding | 14 | 21989232  | 22005350  | SALL2     |
| ENSG00000165828 | 0.499066092 | 0.390640832  | protein_coding | 10 | 135160650 | 135166187 | PRAP1     |
| ENSG00000165832 | 7.945439403 | 8.490068116  | protein_coding | 10 | 116697952 | 116737430 | TRUB1     |
| ENSG00000165837 | 0           | 0.697730409  | protein_coding | 13 | 46108657  | 46189874  | FAM194B   |
| ENSG00000165861 | 8.557227164 | 9.188483253  | protein_coding | 14 | 73436159  | 73493920  | ZFYVE1    |
| ENSG00000165863 | 0.499066092 | 2.039052734  | protein_coding | 10 | 118423207 | 118429481 | C10orf82  |
| ENSG00000165868 | 7.30049066  | 8.222087975  | protein_coding | 10 | 118430703 | 118502085 | HSPA12A   |
| ENSG00000165874 | 0.869158192 | 0.697730409  | protein_coding | 10 | 46897641  | 46939148  | FAM35B    |
| ENSG00000165879 | 4.097495944 | 4.961837817  | protein_coding | 10 | 99079022  | 99081672  | FRAT1     |
| ENSG00000165886 | 7.494827594 | 7.246248121  | protein_coding | 10 | 99258625  | 99330966  | UBTD1     |
| ENSG00000165887 | 2.35979773  | 0.950786998  | protein_coding | 10 | 99332198  | 99343641  | ANKRD2    |
| ENSG00000165891 | 8.455589162 | 8.543951256  | protein_coding | 12 | 77415027  | 77459360  | E2F7      |
| ENSG00000165895 | 8.453889713 | 8.726612716  | protein_coding | 11 | 100558384 | 100861656 | ARHGAP42  |
| ENSG00000165898 | 7.457998197 | 7.357122767  | protein_coding | 14 | 74960423  | 74963809  | ISCA2     |

|                 |             |             |                |    |           |           |          |
|-----------------|-------------|-------------|----------------|----|-----------|-----------|----------|
| ENSG00000165899 | 0           | 0.390640832 | protein_coding | 12 | 80603233  | 80772870  | OTOGL    |
| ENSG00000165905 | 7.868433623 | 4.794098771 | protein_coding | 11 | 45943172  | 45950647  | GYLTL1B  |
| ENSG00000165912 | 9.05999771  | 8.972384393 | protein_coding | 11 | 47199076  | 47207994  | PAC3IN3  |
| ENSG00000165914 | 8.504022011 | 6.952279523 | protein_coding | 14 | 91006932  | 91282823  | TTC7B    |
| ENSG00000165915 | 9.336667406 | 9.960628829 | protein_coding | 11 | 47428683  | 47438047  | SLC39A13 |
| ENSG00000165916 | 10.77115846 | 11.04092444 | protein_coding | 11 | 47440320  | 47447993  | PSMC3    |
| ENSG00000165917 | 3.871730003 | 3.081239798 | protein_coding | 11 | 47459308  | 47470730  | RAPSN    |
| ENSG00000165923 | 4.19837882  | 3.781359661 | protein_coding | 11 | 47681143  | 47736941  | AGBL2    |
| ENSG00000165929 | 5.958104008 | 4.202780776 | protein_coding | 14 | 92246095  | 92333880  | TC2N     |
| ENSG00000165934 | 10.01839363 | 8.679244009 | protein_coding | 14 | 92588281  | 92630755  | CPSF2    |
| ENSG00000165935 | 3.393122761 | 2.971122874 | protein_coding | 12 | 27619743  | 27655118  | C12orf70 |
| ENSG00000165943 | 7.395627075 | 7.36802722  | protein_coding | 14 | 93648541  | 93651273  | MOAP1    |
| ENSG00000165948 | 6.482942724 | 6.398170093 | protein_coding | 14 | 94547628  | 94570192  | IFI27L1  |
| ENSG00000165949 | 10.39344018 | 10.82148229 | protein_coding | 14 | 94571182  | 94583033  | IFI27    |
| ENSG00000165959 | 7.955082807 | 6.064512706 | protein_coding | 14 | 95654735  | 95786243  | CLMN     |
| ENSG00000165972 | 1.407729925 | 1.353254395 | protein_coding | 12 | 96260826  | 96336752  | CCDC38   |
| ENSG00000165983 | 8.006999229 | 7.546612122 | protein_coding | 10 | 16478964  | 16555736  | PTER     |
| ENSG00000165985 | 2.35979773  | 2.420525079 | protein_coding | 10 | 16555742  | 16564004  | C1QL3    |
| ENSG00000165995 | 3.448790144 | 3.453019579 | protein_coding | 10 | 18429606  | 18830798  | CACNB2   |
| ENSG00000165996 | 8.45218826  | 8.914056863 | protein_coding | 10 | 17631958  | 17659376  | PTPLA    |
| ENSG00000165997 | 9.243337861 | 8.078443681 | protein_coding | 10 | 18948334  | 18970568  | ARL5B    |
| ENSG00000166002 | 5.986594255 | 6.392840898 | protein_coding | 11 | 93211638  | 93276674  | C11orf75 |
| ENSG00000166004 | 8.096857104 | 8.480051236 | protein_coding | 11 | 93394805  | 93463522  | KIAA1731 |
| ENSG00000166012 | 10.10702545 | 10.57438579 | protein_coding | 11 | 93463114  | 93517557  | TAF1D    |
| ENSG00000166016 | 8.937654214 | 9.098048079 | protein_coding | 11 | 34172535  | 34379555  | ABTB2    |
| ENSG00000166024 | 8.05038018  | 8.428896259 | protein_coding | 10 | 99894387  | 100004654 | C10orf28 |
| ENSG00000166025 | 7.891216707 | 5.236305879 | protein_coding | 11 | 94439597  | 94609918  | AMOTL1   |
| ENSG00000166033 | 7.254372086 | 8.581912372 | protein_coding | 10 | 124221041 | 124274424 | HTRA1    |
| ENSG00000166035 | 0.499066092 | 0.697730409 | protein_coding | 15 | 58702768  | 58861151  | LIPC     |
| ENSG00000166037 | 9.139327269 | 9.516516751 | protein_coding | 11 | 95523129  | 95565857  | CEP57    |
| ENSG00000166046 | 5.431503808 | 5.656642807 | protein_coding | 12 | 106695707 | 106740793 | TCP11L2  |
| ENSG00000166068 | 8.077121473 | 8.309531754 | protein_coding | 15 | 38544527  | 38649450  | SPRED1   |
| ENSG00000166073 | 9.916573728 | 10.11100039 | protein_coding | 15 | 40091233  | 40213093  | GPR176   |
| ENSG00000166086 | 4.352265886 | 4.585695337 | protein_coding | 11 | 133938820 | 134021896 | JAM3     |
| ENSG00000166104 | 0           | 0.390640832 | pseudogene     | 15 | 62520095  | 62545434  |          |
| ENSG00000166106 | 6.716321419 | 6.376734172 | protein_coding | 11 | 130318869 | 130346532 | ADAMTS15 |
| ENSG00000166123 | 9.812996626 | 10.41987022 | protein_coding | 16 | 46918290  | 46965209  | GPT2     |
| ENSG00000166126 | 3.989024711 | 2.501982735 | protein_coding | 14 | 103388993 | 103399933 | AMN      |
| ENSG00000166128 | 8.344411036 | 9.162099548 | protein_coding | 15 | 63481668  | 63559981  | RAB8B    |
| ENSG00000166130 | 8.342575358 | 8.648269828 | protein_coding | 12 | 99007183  | 99038891  | IKBIP    |
| ENSG00000166133 | 7.409722215 | 7.243290054 | protein_coding | 15 | 40861499  | 40866659  | RPUSD2   |
| ENSG00000166135 | 8.857651982 | 9.069940847 | protein_coding | 10 | 102288829 | 102309763 | HIF1AN   |
| ENSG00000166136 | 6.567100227 | 7.053694091 | protein_coding | 10 | 102267203 | 102289757 | NDUF88   |
| ENSG00000166140 | 8.778393539 | 8.622319665 | protein_coding | 15 | 41099284  | 41106767  | ZFYVE19  |
| ENSG00000166143 | 0.499066092 | 0           | protein_coding | 15 | 41107650  | 41120907  | PPP1R14D |
| ENSG00000166145 | 9.304967144 | 3.906303962 | protein_coding | 15 | 41136216  | 41150405  | SPINT1   |
| ENSG00000166147 | 5.124761037 | 4.917990497 | protein_coding | 15 | 48700503  | 48938046  | FBN1     |
| ENSG00000166153 | 3.502389126 | 3.570966319 | protein_coding | 12 | 100597447 | 100660857 | DEPDC4   |
| ENSG00000166159 | 0.499066092 | 0.390640832 | protein_coding | 12 | 1929433   | 1945918   | LRTM2    |
| ENSG00000166164 | 8.436784206 | 8.91219558  | protein_coding | 16 | 50347938  | 50402845  | BRD7     |
| ENSG00000166165 | 9.897945387 | 7.304170377 | protein_coding | 14 | 103985996 | 103989448 | CKB      |
| ENSG00000166166 | 9.298353251 | 8.461080043 | protein_coding | 14 | 103995521 | 104003410 | TRMT61A  |
| ENSG00000166167 | 8.572970055 | 8.68797299  | protein_coding | 10 | 103113820 | 103317078 | BTRC     |
| ENSG00000166169 | 7.781675404 | 8.132201841 | protein_coding | 10 | 103338639 | 103348027 | POLL     |
| ENSG00000166170 | 9.381161578 | 8.578395649 | protein_coding | 14 | 104022881 | 104029168 | BAG5     |
| ENSG00000166171 | 7.478203418 | 7.992972811 | protein_coding | 10 | 103330317 | 103369425 | DPCD     |
| ENSG00000166173 | 6.244259325 | 7.022976646 | protein_coding | 15 | 71121469  | 71146498  | LARP6    |
| ENSG00000166181 | 10.56462462 | 10.9257172  | protein_coding | 11 | 43333513  | 43366079  | API5     |
| ENSG00000166183 | 4.999881834 | 4.17820932  | protein_coding | 14 | 104552016 | 104579098 | ASPG     |
| ENSG00000166188 | 7.737655476 | 8.117738058 | protein_coding | 16 | 58028572  | 58034357  | ZNF319   |
| ENSG00000166189 | 8.518728184 | 8.486319932 | protein_coding | 10 | 103825147 | 103827792 | HPS6     |
| ENSG00000166192 | 3.871730003 | 4.42790041  | protein_coding | 15 | 72406599  | 72433311  | SENP8    |
| ENSG00000166197 | 11.79762603 | 12.01728578 | protein_coding | 10 | 103911933 | 103923627 | NOLC1    |



|                 |             |             |                |    |           |           |          |
|-----------------|-------------|-------------|----------------|----|-----------|-----------|----------|
| ENSG00000166199 | 8.131289597 | 8.177844832 | protein_coding | 11 | 43902361  | 43941816  | ALKBH3   |
| ENSG00000166200 | 9.139327269 | 9.400488931 | protein_coding | 15 | 49398268  | 49447858  | COPS2    |
| ENSG00000166206 | 6.902274257 | 7.326703453 | protein_coding | 15 | 26788693  | 27184686  | GABRB3   |
| ENSG00000166220 | 0.499066092 | 0           | protein_coding | 10 | 72530995  | 72545157  | C10orf27 |
| ENSG00000166224 | 9.978760171 | 9.407112231 | protein_coding | 10 | 72575717  | 72640930  | SGPL1    |
| ENSG00000166225 | 7.720795447 | 7.722599249 | protein_coding | 12 | 69864129  | 69973562  | FRS2     |
| ENSG00000166226 | 10.80187738 | 10.96866235 | protein_coding | 12 | 69979114  | 69995350  | CCT2     |
| ENSG00000166228 | 8.554057865 | 8.535512415 | protein_coding | 10 | 72642037  | 72648541  | PCBD1    |
| ENSG00000166233 | 9.182040809 | 9.140798547 | protein_coding | 15 | 72766667  | 72879692  | ARIH1    |
| ENSG00000166246 | 2.238690726 | 3.532712221 | protein_coding | 16 | 4784273   | 4799397   | C16orf71 |
| ENSG00000166250 | 6.941611359 | 5.832272499 | protein_coding | 11 | 122943035 | 123065989 | CLMP     |
| ENSG00000166260 | 8.221948786 | 8.193254836 | protein_coding | 17 | 53038568  | 53046064  | COX11    |
| ENSG00000166261 | 7.464764762 | 7.668495823 | protein_coding | 11 | 123594885 | 123612383 | ZNF202   |
| ENSG00000166262 | 4.165528823 | 4.17820932  | protein_coding | 15 | 49619159  | 49913128  | C15orf33 |
| ENSG00000166263 | 6.573375019 | 6.827478203 | protein_coding | 17 | 53046088  | 53241646  | STXPB4   |
| ENSG00000166266 | 8.762005612 | 9.00068704  | protein_coding | 11 | 107879459 | 107978503 | CUL5     |
| ENSG00000166268 | 0           | 1.518964905 | protein_coding | 12 | 70219084  | 70352877  | C12orf28 |
| ENSG00000166272 | 8.521975964 | 8.904726341 | protein_coding | 10 | 104503727 | 104576021 | C10orf26 |
| ENSG00000166275 | 5.498982484 | 6.440109466 | protein_coding | 10 | 104613980 | 104632990 | C10orf32 |
| ENSG00000166278 | 4.19837882  | 3.714580548 | protein_coding | 6  | 31865562  | 31913449  | C2       |
| ENSG00000166289 | 8.18144485  | 8.265014588 | protein_coding | 19 | 30156327  | 30166376  | PLEKHF1  |
| ENSG00000166292 | 1.616589159 | 0           | protein_coding | 17 | 53796990  | 53809482  | TMEM100  |
| ENSG00000166295 | 8.267164507 | 8.320800493 | protein_coding | 10 | 73975787  | 73995472  | ANAPC16  |
| ENSG00000166311 | 8.043616684 | 9.351195062 | protein_coding | 11 | 6411655   | 6416228   | SMPD1    |
| ENSG00000166313 | 7.624369505 | 8.101495266 | protein_coding | 11 | 6416354   | 6440644   | APBB1    |
| ENSG00000166317 | 1.16343121  | 0.390640832 | protein_coding | 10 | 75404639  | 75415830  | SYNPO2L  |
| ENSG00000166321 | 6.290697143 | 5.995870484 | protein_coding | 10 | 74870217  | 74891586  | NUDT13   |
| ENSG00000166323 | 3.274897671 | 2.579085888 | protein_coding | 11 | 108179246 | 108338258 | C11orf65 |
| ENSG00000166326 | 9.784207642 | 9.83559787  | protein_coding | 11 | 35684353  | 35829775  | TRIM44   |
| ENSG00000166333 | 4.165528823 | 4.693656882 | protein_coding | 11 | 6624961   | 6632102   | ILK      |
| ENSG00000166337 | 9.092036341 | 9.515904068 | protein_coding | 11 | 6627526   | 6633898   | TAF10    |
| ENSG00000166340 | 10.97152701 | 11.70170789 | protein_coding | 11 | 6634000   | 6640692   | TPP1     |
| ENSG00000166341 | 1.407729925 | 2.144285137 | protein_coding | 11 | 6642554   | 6677085   | DCHS1    |
| ENSG00000166343 | 3.871730003 | 3.232099092 | protein_coding | 10 | 75183339  | 75193319  | ZMYND17  |
| ENSG00000166347 | 7.484876093 | 8.289597152 | protein_coding | 18 | 71920528  | 71959251  | CYB5A    |
| ENSG00000166348 | 8.791909364 | 8.801925129 | protein_coding | 10 | 75257296  | 75385711  | USP54    |
| ENSG00000166349 | 2.671945279 | 3.493416095 | protein_coding | 11 | 36532259  | 36614706  | RAG1     |
| ENSG00000166352 | 6.407685389 | 6.900645892 | protein_coding | 11 | 36616051  | 36694823  | C11orf74 |
| ENSG00000166359 | 2.671945279 | 2.912743273 | protein_coding | 19 | 33622998  | 33666705  | WDR88    |
| ENSG00000166377 | 6.548110424 | 7.201227369 | protein_coding | 18 | 76829394  | 77138278  | ATP9B    |
| ENSG00000166387 | 7.19863491  | 7.519971735 | protein_coding | 11 | 7534529   | 7678358   | PPFIBP2  |
| ENSG00000166391 | 0.499066092 | 0           | protein_coding | 11 | 75428864  | 75444003  | MOGAT2   |
| ENSG00000166394 | 8.973680846 | 9.067434305 | protein_coding | 11 | 7686331   | 7698453   | CYB5R2   |
| ENSG00000166396 | 5.270908378 | 5.816437314 | protein_coding | 18 | 61420169  | 61472604  | SERPINB7 |
| ENSG00000166398 | 7.406211319 | 7.462626902 | protein_coding | 19 | 34745456  | 34846471  | KIAA0355 |
| ENSG00000166401 | 8.282565319 | 8.467431533 | protein_coding | 18 | 61637159  | 61672278  | SERPINB8 |
| ENSG00000166402 | 0           | 0.390640832 | protein_coding | 11 | 8040791   | 8127659   | TUB      |
| ENSG00000166407 | 1.616589159 | 1.925536307 | protein_coding | 11 | 8245851   | 8290263   | LMO1     |
| ENSG00000166411 | 7.642387679 | 7.688207601 | protein_coding | 15 | 78423840  | 78464291  | IDH3A    |
| ENSG00000166432 | 4.230497448 | 7.03670965  | protein_coding | X  | 101137262 | 101187004 | ZMAT1    |
| ENSG00000166435 | 6.212449006 | 6.582669759 | protein_coding | 11 | 74518784  | 74660245  | XRRA1    |
| ENSG00000166436 | 7.868433623 | 7.612284109 | protein_coding | 11 | 8633584   | 8693413   | TRIM66   |
| ENSG00000166439 | 7.590740122 | 7.95731437  | protein_coding | 11 | 74459913  | 74553458  | RNF169   |
| ENSG00000166441 | 11.52967299 | 12.26772514 | protein_coding | 11 | 8703958   | 8736306   | RPL27A   |
| ENSG00000166444 | 10.19663597 | 10.42705723 | protein_coding | 11 | 8714898   | 8932498   | ST5      |
| ENSG00000166446 | 5.054730169 | 5.35066967  | protein_coding | 16 | 80637609  | 80838226  | CDYL2    |
| ENSG00000166448 | 0.499066092 | 0           | protein_coding | 7  | 98444111  | 98468394  | TMEM130  |
| ENSG00000166450 | 6.664362065 | 6.754561598 | protein_coding | 15 | 55903744  | 56035288  | PRTG     |
| ENSG00000166451 | 8.586993258 | 9.071609459 | protein_coding | 16 | 81040103  | 81066719  | CENPN    |
| ENSG00000166452 | 7.893726093 | 8.119352325 | protein_coding | 11 | 8932686   | 8941631   | AKIP1    |
| ENSG00000166454 | 9.226515195 | 9.304420832 | protein_coding | 16 | 81069452  | 81080963  | ATMIN    |
| ENSG00000166455 | 4.863159938 | 5.175534283 | protein_coding | 16 | 81087102  | 81110872  | C16orf46 |
| ENSG00000166471 | 8.693086466 | 7.955508102 | protein_coding | 11 | 9302201   | 9336327   | TMEM41B  |

|                 |             |             |                   |    |           |           |          |
|-----------------|-------------|-------------|-------------------|----|-----------|-----------|----------|
| ENSG00000166473 | 4.491309013 | 4.640685763 | polymorphic_pse   | 16 | 81134480  | 81253975  | PKD1L2   |
| ENSG00000166477 | 8.079327701 | 8.165397208 | protein_coding    | 15 | 52230222  | 52264003  | LEO1     |
| ENSG00000166478 | 7.612231145 | 7.596144237 | protein_coding    | 11 | 9481866   | 9550071   | ZNF143   |
| ENSG00000166479 | 8.711694395 | 9.186944555 | protein_coding    | 18 | 66340925  | 66382535  | TMX3     |
| ENSG00000166482 | 3.502389126 | 4.448594745 | protein_coding    | 17 | 19286755  | 19290553  | MFAP4    |
| ENSG00000166483 | 9.38473389  | 9.410412513 | protein_coding    | 11 | 9595228   | 9615004   | WEE1     |
| ENSG00000166484 | 8.173205795 | 8.894392583 | protein_coding    | 17 | 19281034  | 19286857  | MAPK7    |
| ENSG00000166492 | 1.799000381 | 1.16600992  | pseudogene        | 11 | 3431582   | 3443726   | FAM86GP  |
| ENSG00000166503 | 8.211928911 | 8.149685112 | protein_coding    | 15 | 83784320  | 83876770  |          |
| ENSG00000166507 | 7.746012174 | 7.926295939 | protein_coding    | 10 | 75561669  | 75571589  | NDST2    |
| ENSG00000166508 | 12.30874036 | 12.01219011 | protein_coding    | 7  | 99690351  | 99699563  | MCM7     |
| ENSG00000166510 | 5.879259127 | 5.709041716 | protein_coding    | 18 | 52568740  | 52626739  | CCDC68   |
| ENSG00000166526 | 8.207901394 | 8.106387334 | protein_coding    | 7  | 99661656  | 99680171  | ZNF3     |
| ENSG00000166529 | 5.124761037 | 4.810179682 | protein_coding    | 7  | 99647390  | 99662661  | ZSCAN21  |
| ENSG00000166532 | 7.853042529 | 7.522414019 | protein_coding    | 12 | 8834196   | 8935691   | RIMKLB   |
| ENSG00000166546 | 6.793601635 | 6.371325053 | protein_coding    | 16 | 66461200  | 66527432  | BEAN1    |
| ENSG00000166548 | 8.032273249 | 8.360927302 | protein_coding    | 16 | 66503715  | 66586447  | TK2      |
| ENSG00000166557 | 9.324628822 | 9.711058296 | protein_coding    | 15 | 79603404  | 79704334  | TMED3    |
| ENSG00000166558 | 0.869158192 | 0.697730409 | protein_coding    | 16 | 84043272  | 84076241  | SLC38A8  |
| ENSG00000166562 | 7.127924785 | 7.928139131 | protein_coding    | 18 | 56807087  | 56826068  | SEC11C   |
| ENSG00000166575 | 8.366258896 | 7.650745242 | protein_coding    | 11 | 86748886  | 87034756  | TMEM135  |
| ENSG00000166578 | 6.400645076 | 6.198834244 | protein_coding    | 12 | 113633246 | 113658899 | IQCD     |
| ENSG00000166579 | 9.221529789 | 9.705158168 | protein_coding    | 17 | 8339179   | 8383942   | NDEL1    |
| ENSG00000166582 | 8.687312327 | 9.309379244 | protein_coding    | 17 | 16245848  | 16256813  | CENPV    |
| ENSG00000166589 | 1.407729925 | 0.697730409 | protein_coding    | 16 | 66942025  | 66952887  | CDH16    |
| ENSG00000166592 | 10.15645003 | 10.60120454 | protein_coding    | 16 | 66955582  | 66959547  | RRAD     |
| ENSG00000166595 | 9.198372384 | 9.678578614 | protein_coding    | 16 | 66965959  | 66968326  | FAM96B   |
| ENSG00000166596 | 3.004694206 | 3.714580548 | protein_coding    | 17 | 9479944   | 9546776   | WDR16    |
| ENSG00000166598 | 12.5744085  | 12.85924707 | protein_coding    | 12 | 104323885 | 104347423 | HSP90B1  |
| ENSG00000166619 | 9.670274772 | 9.432656416 | protein_coding    | 20 | 36130816  | 36156333  | BLCAP    |
| ENSG00000166664 | 1.16343121  | 1.518964905 | protein_coding    | 15 | 30653443  | 30686052  | CHRFAM7A |
| ENSG00000166667 | 3.744048221 | 3.32456471  | pseudogene        | 7  | 101986192 | 101996889 |          |
| ENSG00000166669 | 7.618313091 | 7.918899532 | protein_coding    | 16 | 10420291  | 10577495  | ATF7IP2  |
| ENSG00000166670 | 1.616589159 | 3.027231696 | protein_coding    | 11 | 102641234 | 102651359 | MMP10    |
| ENSG00000166676 | 2.57521082  | 2.912743273 | protein_coding    | 16 | 10855083  | 10912621  | FAM18A   |
| ENSG00000166682 | 3.077135474 | 3.532712221 | protein_coding    | 11 | 113558272 | 113577095 | TMPRSS5  |
| ENSG00000166685 | 8.572970055 | 8.696649474 | protein_coding    | 17 | 71188771  | 71204646  | COG1     |
| ENSG00000166689 | 5.977159882 | 5.466810074 | protein_coding    | 11 | 16799842  | 17035990  | PLEKHA7  |
| ENSG00000166704 | 7.618313091 | 7.659647832 | protein_coding    | 19 | 58488421  | 58514717  | ZNF606   |
| ENSG00000166707 | 0           | 0.390640832 | processed_transcX |    | 103356822 | 103360533 |          |
| ENSG00000166710 | 12.65418289 | 13.69747082 | protein_coding    | 15 | 45003675  | 45011075  | B2M      |
| ENSG00000166716 | 9.219530792 | 9.340162149 | protein_coding    | 15 | 85291866  | 85349659  | ZNF592   |
| ENSG00000166734 | 9.442434712 | 9.087365757 | protein_coding    | 15 | 44580927  | 44707956  | CASC4    |
| ENSG00000166736 | 1.799000381 | 1.353254395 | protein_coding    | 11 | 113845603 | 113861035 | HTR3A    |
| ENSG00000166741 | 10.51128816 | 11.26364488 | protein_coding    | 11 | 114128509 | 114184007 | NNMT     |
| ENSG00000166743 | 1.16343121  | 0           | protein_coding    | 16 | 20634559  | 20710212  | ACSM1    |
| ENSG00000166747 | 10.31041517 | 10.09673117 | protein_coding    | 16 | 71762913  | 71843104  | AP1G1    |
| ENSG00000166750 | 10.03383333 | 10.04288547 | protein_coding    | 17 | 33570086  | 33594739  | SLFN5    |
| ENSG00000166762 | 6.121171528 | 5.886365696 | protein_coding    | 15 | 43920701  | 43960316  | CATSPER2 |
| ENSG00000166763 | 1.616589159 | 1.802319292 | pseudogene        | 15 | 43991686  | 44010382  | STRCP1   |
| ENSG00000166770 | 7.140657543 | 7.546612122 | protein_coding    | 19 | 56989552  | 57006801  |          |
| ENSG00000166780 | 5.588445295 | 6.908136232 | protein_coding    | 16 | 15528152  | 15718885  | C16orf45 |
| ENSG00000166783 | 9.409495425 | 9.491180897 | protein_coding    | 16 | 15688243  | 15737023  | KIAA0430 |
| ENSG00000166788 | 8.221948786 | 8.202422444 | protein_coding    | 11 | 18091482  | 18127638  | SAAL1    |
| ENSG00000166793 | 2.10647801  | 3.081239798 | protein_coding    | 11 | 57412560  | 57417417  | YPEL4    |
| ENSG00000166794 | 10.02984629 | 10.51951035 | protein_coding    | 15 | 64448011  | 64455404  | PPIB     |
| ENSG00000166796 | 5.613019223 | 5.808454063 | protein_coding    | 11 | 18433854  | 18473605  | LDHC     |
| ENSG00000166797 | 8.101206377 | 8.502492199 | protein_coding    | 15 | 64364758  | 64386217  | FAM96A   |
| ENSG00000166800 | 2.471521042 | 0.950786998 | protein_coding    | 11 | 18477371  | 18501147  | LDHAL6A  |
| ENSG00000166801 | 9.304967144 | 9.681859685 | protein_coding    | 11 | 58910221  | 58922512  | FAM111A  |
| ENSG00000166803 | 8.133414584 | 8.626866398 | protein_coding    | 15 | 64657193  | 64679886  | KIAA0101 |
| ENSG00000166813 | 6.163378456 | 5.32851069  | protein_coding    | 15 | 90152020  | 90198682  | KIF7     |
| ENSG00000166816 | 5.91922012  | 6.002883551 | protein_coding    | 16 | 75145758  | 75150669  | LDHD     |

|                 |             |             |                |    |           |           |          |
|-----------------|-------------|-------------|----------------|----|-----------|-----------|----------|
| ENSG00000166819 | 1.799000381 | 2.242360793 | protein_coding | 15 | 90207596  | 90222658  | PLIN1    |
| ENSG00000166821 | 5.806547963 | 5.691786012 | protein_coding | 15 | 90220995  | 90234014  | PEX11A   |
| ENSG00000166822 | 7.609180529 | 7.447284805 | protein_coding | 16 | 75476952  | 75550136  | TMEM170A |
| ENSG00000166823 | 3.830412367 | 4.319727133 | protein_coding | 15 | 90291892  | 90294541  | MESP1    |
| ENSG00000166825 | 11.65643998 | 11.47083239 | protein_coding | 15 | 90328120  | 90358633  | ANPEP    |
| ENSG00000166828 | 0.499066092 | 0.390640832 | protein_coding | 16 | 23194036  | 23228204  | SCNN1G   |
| ENSG00000166831 | 0.499066092 | 0.950786998 | protein_coding | 15 | 65032091  | 65067786  | RBPM52   |
| ENSG00000166833 | 9.689899429 | 10.46246481 | protein_coding | 11 | 19372271  | 20143144  | NAV2     |
| ENSG00000166839 | 5.525114348 | 5.893930351 | protein_coding | 15 | 65204101  | 65251042  | ANKDD1A  |
| ENSG00000166845 | 7.680671792 | 7.864110577 | protein_coding | 18 | 51884955  | 51908404  | C18orf54 |
| ENSG00000166847 | 9.51676008  | 9.442361917 | protein_coding | 16 | 23652713  | 23681195  | DCTN5    |
| ENSG00000166848 | 8.508940744 | 8.795881219 | protein_coding | 16 | 75681684  | 75795051  | TERF2IP  |
| ENSG00000166851 | 10.79752881 | 10.54705904 | protein_coding | 16 | 23688977  | 23701688  | PLK1     |
| ENSG00000166855 | 8.782461599 | 9.133627746 | protein_coding | 15 | 65440557  | 65477680  | CLPX     |
| ENSG00000166856 | 0           | 1.802319292 | protein_coding | 12 | 57388230  | 57390468  | GPR182   |
| ENSG00000166860 | 6.681890601 | 7.060432274 | protein_coding | 12 | 57392618  | 57400230  | ZBTB39   |
| ENSG00000166863 | 0.499066092 | 1.802319292 | protein_coding | 12 | 57403784  | 57422667  | TAC3     |
| ENSG00000166866 | 0           | 1.667587519 | protein_coding | 12 | 57422301  | 57444982  | MYO1A    |
| ENSG00000166881 | 9.240383373 | 9.409093306 | protein_coding | 12 | 57449426  | 57481846  | TMEM194A |
| ENSG00000166886 | 8.396654395 | 8.015686953 | protein_coding | 12 | 57482677  | 57489259  | NAB2     |
| ENSG00000166887 | 9.446713374 | 9.171466637 | protein_coding | 15 | 42450899  | 42500514  | VPS39    |
| ENSG00000166888 | 10.91860221 | 11.03537742 | protein_coding | 12 | 57489191  | 57525922  | STAT6    |
| ENSG00000166889 | 10.5080162  | 10.54014571 | protein_coding | 11 | 59404189  | 59436471  | PATL1    |
| ENSG00000166896 | 6.023726639 | 6.371325053 | protein_coding | 12 | 58335324  | 58351052  | XRCC6BP1 |
| ENSG00000166897 | 9.047656547 | 6.941369681 | protein_coding | 22 | 37764000  | 37823505  | ELFN2    |
| ENSG00000166900 | 8.577659618 | 9.339469783 | protein_coding | 11 | 59480929  | 59573354  | STX3     |
| ENSG00000166902 | 9.012297947 | 9.336696989 | protein_coding | 11 | 59573608  | 59578345  | MRPL16   |
| ENSG00000166908 | 9.644431499 | 9.038718229 | protein_coding | 12 | 57984957  | 57997198  | PIP4K2C  |
| ENSG00000166912 | 7.0218028   | 7.405556541 | protein_coding | 15 | 31231144  | 31283810  | MTMR10   |
| ENSG00000166913 | 11.94977284 | 11.80186107 | protein_coding | 20 | 43514317  | 43537173  | YWHA8    |
| ENSG00000166920 | 9.918423401 | 10.11989792 | protein_coding | 15 | 45722727  | 45740959  | C15orf48 |
| ENSG00000166922 | 4.689181911 | 5.683080141 | protein_coding | 15 | 32933877  | 32989299  | SCG5     |
| ENSG00000166923 | 1.16343121  | 0           | protein_coding | 15 | 33010175  | 33026870  | GREM1    |
| ENSG00000166924 | 5.525114348 | 4.226940739 | protein_coding | 7  | 100081550 | 100092422 | NYAP1    |
| ENSG00000166925 | 9.845117281 | 9.260474903 | protein_coding | 7  | 100060982 | 100076902 | TSC22D4  |
| ENSG00000166927 | 0           | 0.390640832 | protein_coding | 11 | 60145955  | 60163424  | MS4A7    |
| ENSG00000166938 | 7.72361917  | 7.596144237 | protein_coding | 15 | 66585555  | 66626236  | DIS3L    |
| ENSG00000166946 | 7.978913023 | 8.266472275 | protein_coding | 15 | 43477316  | 43487396  | CCNDBP1  |
| ENSG00000166947 | 2.57521082  | 1.802319292 | protein_coding | 15 | 43398423  | 43513481  | EPB42    |
| ENSG00000166949 | 11.30018487 | 11.10179951 | protein_coding | 15 | 67356101  | 67487533  | SMAD3    |
| ENSG00000166963 | 4.642199401 | 5.35066967  | protein_coding | 15 | 43803156  | 43829571  | MAP1A    |
| ENSG00000166965 | 6.716321419 | 7.418726742 | protein_coding | 15 | 91498100  | 91506349  | RCCD1    |
| ENSG00000166971 | 6.350376764 | 6.835357159 | protein_coding | 16 | 53524146  | 53538323  | AKTIP    |
| ENSG00000166974 | 7.988335976 | 7.646273261 | protein_coding | 18 | 32556892  | 32725381  | MAPRE2   |
| ENSG00000166979 | 1.16343121  | 0.390640832 | protein_coding | 21 | 33784314  | 33887707  | C21orf63 |
| ENSG00000166984 | 0.499066092 | 0.697730409 | protein_coding | 6  | 167559902 | 167610401 | TCP10L2  |
| ENSG00000166986 | 11.61616959 | 11.80135835 | protein_coding | 12 | 57869228  | 57911352  | MARS     |
| ENSG00000166987 | 9.913485661 | 9.961978945 | protein_coding | 12 | 57914493  | 57923931  | MBD6     |
| ENSG00000166997 | 7.30049066  | 7.683850422 | protein_coding | 7  | 99717236  | 99723134  | CNPY4    |
| ENSG00000167004 | 11.358119   | 11.76275923 | protein_coding | 15 | 44038590  | 44065477  | PDIA3    |
| ENSG00000167005 | 10.0178186  | 10.42542696 | protein_coding | 16 | 56463045  | 56486111  | NUDT21   |
| ENSG00000167011 | 3.146112541 | 2.242360793 | protein_coding | 7  | 100813774 | 100823557 | NAT16    |
| ENSG00000167034 | 7.374222747 | 7.726841127 | protein_coding | 8  | 23536206  | 23540440  | NKX3-1   |
| ENSG00000167037 | 3.871730003 | 3.532712221 | protein_coding | 22 | 25202188  | 25323545  | SGSM1    |
| ENSG00000167046 | 2.57521082  | 2.420525079 | protein_coding | 20 | 61272071  | 61274656  |          |
| ENSG00000167065 | 6.414691513 | 6.750400563 | protein_coding | 22 | 31048038  | 31063877  | DUSP18   |
| ENSG00000167074 | 7.210761201 | 6.952279523 | protein_coding | 22 | 41763337  | 41795330  | TEF      |
| ENSG00000167077 | 3.448790144 | 4.385599336 | protein_coding | 22 | 42095503  | 42195460  | mei-01   |
| ENSG00000167080 | 0.499066092 | 0           | protein_coding | 17 | 47209822  | 47247351  | B4GALNT2 |
| ENSG00000167081 | 7.759833327 | 7.726841127 | protein_coding | 9  | 128509624 | 128729656 | PBX3     |
| ENSG00000167085 | 10.03497047 | 10.07900496 | protein_coding | 17 | 47481414  | 47492246  | PHB      |
| ENSG00000167088 | 8.805299741 | 9.102135695 | protein_coding | 18 | 19192260  | 19210204  | SNRPD1   |
| ENSG00000167094 | 1.16343121  | 1.925536307 | protein_coding | 9  | 130478345 | 130493879 | TTC16    |

|                 |             |             |                  |    |           |           |           |
|-----------------|-------------|-------------|------------------|----|-----------|-----------|-----------|
| ENSG00000167100 | 1.407729925 | 1.353254395 | protein_coding   | 17 | 48187404  | 48207246  | SAMD14    |
| ENSG00000167103 | 6.622614428 | 5.22435463  | protein_coding   | 9  | 130683158 | 130693076 | PIP5KL1   |
| ENSG00000167105 | 6.364918751 | 5.759604001 | protein_coding   | 17 | 48348767  | 48358844  | TMEM92    |
| ENSG00000167106 | 10.15121608 | 9.987835859 | protein_coding   | 9  | 130702858 | 130742812 | FAM102A   |
| ENSG00000167107 | 7.058051099 | 7.444711851 | protein_coding   | 17 | 48503519  | 48552206  | ACSF2     |
| ENSG00000167110 | 10.34199724 | 9.997084738 | protein_coding   | 9  | 131018108 | 131038274 | GOLGA2    |
| ENSG00000167112 | 9.317170221 | 9.282254961 | protein_coding   | 9  | 131071382 | 131085021 | TRUB2     |
| ENSG00000167113 | 9.139327269 | 9.197681135 | protein_coding   | 9  | 131084815 | 131096351 | COQ4      |
| ENSG00000167114 | 10.11618743 | 9.730728943 | protein_coding   | 9  | 131102925 | 131123502 | SLC27A4   |
| ENSG00000167117 | 0           | 0.390640832 | processed_transc | 17 | 48838390  | 48844918  | LINC00483 |
| ENSG00000167118 | 9.612034058 | 9.666483771 | protein_coding   | 9  | 131133598 | 131153015 | URM1      |
| ENSG00000167123 | 9.442434712 | 9.730728943 | protein_coding   | 9  | 131174030 | 131199627 | CERCAM    |
| ENSG00000167130 | 8.443650765 | 8.273738696 | protein_coding   | 9  | 131843379 | 131852717 | DOLPP1    |
| ENSG00000167136 | 6.059927234 | 6.525377513 | protein_coding   | 9  | 131580753 | 131584956 | ENDOG     |
| ENSG00000167157 | 2.762599152 | 2.039052734 | protein_coding   | 9  | 132427920 | 132484875 | PRRX2     |
| ENSG00000167159 | 3.554067925 | 3.993387124 | protein_coding   | 17 | 43717670  | 43719667  | C17orf69  |
| ENSG00000167173 | 9.615838797 | 8.93895195  | protein_coding   | 15 | 75487984  | 75504510  | C15orf39  |
| ENSG00000167178 | 0.869158192 | 1.16600992  | protein_coding   | 15 | 74392652  | 74430881  | ISLR2     |
| ENSG00000167182 | 8.436784206 | 7.827052132 | protein_coding   | 17 | 45973516  | 46006323  | SP2       |
| ENSG00000167183 | 3.004694206 | 1.802319292 | protein_coding   | 17 | 46029336  | 46035110  | PRR15L    |
| ENSG00000167186 | 6.965663283 | 7.289906366 | protein_coding   | 16 | 19078921  | 19091762  | COQ7      |
| ENSG00000167191 | 10.08358792 | 9.402479116 | protein_coding   | 16 | 19868616  | 19897489  | GPRC5B    |
| ENSG00000167193 | 10.22779886 | 10.32267696 | protein_coding   | 17 | 1323983   | 1359552   | CRK       |
| ENSG00000167194 | 0           | 0.390640832 | protein_coding   | 16 | 30034655  | 30039057  | C16orf92  |
| ENSG00000167196 | 8.247679379 | 8.235547225 | protein_coding   | 15 | 76196200  | 76227609  | FBXO22    |
| ENSG00000167202 | 8.349904097 | 8.595894166 | protein_coding   | 15 | 78276378  | 78370066  | TBC1D2B   |
| ENSG00000167207 | 4.131913373 | 3.411459265 | protein_coding   | 16 | 50727514  | 50766988  | NOD2      |
| ENSG00000167208 | 0           | 0.390640832 | protein_coding   | 16 | 50700211  | 50715264  | SNX20     |
| ENSG00000167216 | 4.77879189  | 5.212303549 | protein_coding   | 18 | 44526787  | 44628613  | KATNAL2   |
| ENSG00000167220 | 7.182306324 | 7.384230902 | protein_coding   | 18 | 44633782  | 44676871  | HDHD2     |
| ENSG00000167230 | 0.869158192 | 1.667587519 | protein_coding   | 17 | 35732985  | 35749660  | C17orf78  |
| ENSG00000167232 | 8.199812472 | 8.492561507 | protein_coding   | 19 | 23540501  | 23578269  | ZNF91     |
| ENSG00000167244 | 6.788216822 | 5.863430791 | protein_coding   | 11 | 2150342   | 2182439   | IGF2      |
| ENSG00000167257 | 7.392081667 | 7.91704449  | protein_coding   | 11 | 117103341 | 117157161 | RNF214    |
| ENSG00000167258 | 9.689899429 | 9.370979666 | protein_coding   | 17 | 37617739  | 37721160  | CDK12     |
| ENSG00000167264 | 8.068262669 | 8.257703981 | protein_coding   | 16 | 68050054  | 68113223  | DUS2L     |
| ENSG00000167272 | 7.392081667 | 7.584504199 | protein_coding   | 12 | 121016567 | 121019201 | POP5      |
| ENSG00000167280 | 8.355376323 | 8.650504459 | protein_coding   | 17 | 77071019  | 77084681  | ENGASE    |
| ENSG00000167281 | 3.698846687 | 3.87606762  | protein_coding   | 17 | 77085427  | 77613550  | RBFOX3    |
| ENSG00000167283 | 8.919297816 | 9.478658596 | protein_coding   | 11 | 118271869 | 118302211 | ATP5L     |
| ENSG00000167286 | 0           | 0.390640832 | protein_coding   | 11 | 118209669 | 118213459 | CD3D      |
| ENSG00000167291 | 9.429522058 | 8.902852973 | protein_coding   | 17 | 77911708  | 78009647  | TBC1D16   |
| ENSG00000167302 | 7.654275977 | 7.683850422 | protein_coding   | 17 | 79202079  | 79212891  | C17orf56  |
| ENSG00000167306 | 7.60612345  | 5.486957566 | protein_coding   | 18 | 47349156  | 47721451  | MYO5B     |
| ENSG00000167311 | 0.869158192 | 1.16600992  | protein_coding   | 11 | 3659733   | 3663546   | ART5      |
| ENSG00000167315 | 9.024943975 | 9.177677745 | protein_coding   | 18 | 47309869  | 47340273  | ACAA2     |
| ENSG00000167323 | 9.093128531 | 8.887777807 | protein_coding   | 11 | 3875757   | 4114439   | STIM1     |
| ENSG00000167325 | 10.64688074 | 10.92525585 | protein_coding   | 11 | 4115937   | 4160106   | RRM1      |
| ENSG00000167333 | 7.246540262 | 7.63953919  | protein_coding   | 11 | 4619902   | 4629489   | TRIM68    |
| ENSG00000167355 | 1.16343121  | 0           | processed_transc | 11 | 5326206   | 5526882   |           |
| ENSG00000167363 | 6.328285199 | 5.175534283 | protein_coding   | 17 | 80693452  | 80709073  | FN3K      |
| ENSG00000167371 | 4.409500985 | 5.125003832 | protein_coding   | 16 | 29823177  | 29827795  | PRRT2     |
| ENSG00000167377 | 3.211941663 | 4.127774132 | protein_coding   | 16 | 71481500  | 71496998  | ZNF23     |
| ENSG00000167378 | 9.179986301 | 9.108651887 | protein_coding   | 19 | 44088521  | 44100287  | IRGQ      |
| ENSG00000167380 | 8.504022011 | 8.706348549 | protein_coding   | 19 | 44645710  | 44681836  | ZNF226    |
| ENSG00000167383 | 8.46911316  | 8.475016594 | protein_coding   | 19 | 44930426  | 44952665  | ZNF229    |
| ENSG00000167384 | 7.326727684 | 7.616862529 | protein_coding   | 19 | 44979861  | 45004574  | ZNF180    |
| ENSG00000167390 | 0.499066092 | 0           | pseudogene       | 20 | 23969929  | 23971084  | POM121L3P |
| ENSG00000167393 | 8.259402007 | 8.434094156 | protein_coding   | X  | 294698    | 347690    | PPP2R3B   |
| ENSG00000167394 | 7.527512071 | 7.454976247 | protein_coding   | 16 | 31072164  | 31085641  | ZNF668    |
| ENSG00000167395 | 8.749591335 | 8.742412084 | protein_coding   | 16 | 31085743  | 31095517  | ZNF646    |
| ENSG00000167397 | 7.633406721 | 8.222087975 | protein_coding   | 16 | 31102163  | 31107301  | VKORC1    |
| ENSG00000167414 | 0           | 0.390640832 | protein_coding   | 19 | 47137333  | 47137939  | GNG8      |

|                 |             |             |                |    |           |           |          |
|-----------------|-------------|-------------|----------------|----|-----------|-----------|----------|
| ENSG00000167434 | 0           | 0.390640832 | protein_coding | 17 | 58227302  | 58236902  | CA4      |
| ENSG00000167447 | 8.265227794 | 8.729786462 | protein_coding | 17 | 57287371  | 57292608  | SMG8     |
| ENSG00000167460 | 13.37211917 | 13.45451319 | protein_coding | 19 | 16178317  | 16213813  | TPM4     |
| ENSG00000167461 | 10.76568906 | 10.46055573 | protein_coding | 19 | 16222490  | 16244443  | RAB8A    |
| ENSG00000167468 | 12.01850017 | 12.44328782 | protein_coding | 19 | 1103936   | 1106786   | GPX4     |
| ENSG00000167470 | 11.08044692 | 10.06399506 | protein_coding | 19 | 1248552   | 1259139   | MIDN     |
| ENSG00000167476 | 8.46911316  | 8.187110572 | protein_coding | 19 | 2252250   | 2256422   | JSRP1    |
| ENSG00000167483 | 2.238690726 | 2.501982735 | protein_coding | 19 | 17634110  | 17664647  | FAM129C  |
| ENSG00000167487 | 7.847875458 | 7.405556541 | protein_coding | 19 | 18747838  | 18781302  | KLHL26   |
| ENSG00000167491 | 12.20862045 | 11.69806667 | protein_coding | 19 | 19496639  | 19619740  | GATAD2A  |
| ENSG00000167508 | 9.575770339 | 8.588920207 | protein_coding | 16 | 88718343  | 88729569  | MVD      |
| ENSG00000167513 | 9.796999249 | 9.3669085   | protein_coding | 16 | 88869621  | 88875666  | CDT1     |
| ENSG00000167515 | 8.53328596  | 8.717049372 | protein_coding | 16 | 88922628  | 88929094  | TRAPPC2L |
| ENSG00000167522 | 11.20615173 | 11.11055089 | protein_coding | 16 | 89334038  | 89556969  | ANKRD11  |
| ENSG00000167523 | 7.277615649 | 7.844724842 | protein_coding | 16 | 89724210  | 89737680  | C16orf55 |
| ENSG00000167524 | 7.007971391 | 6.642271819 | protein_coding | 17 | 26907030  | 26941474  |          |
| ENSG00000167525 | 5.485736881 | 5.125003832 | protein_coding | 17 | 27030215  | 27038872  | PROCA1   |
| ENSG00000167526 | 12.55630746 | 12.9401949  | protein_coding | 16 | 89627065  | 89630950  | RPL13    |
| ENSG00000167528 | 5.575999561 | 5.486957566 | protein_coding | 12 | 48733791  | 48745197  | ZNF641   |
| ENSG00000167535 | 7.222786417 | 7.442134301 | protein_coding | 12 | 49207577  | 49222724  | CACNB3   |
| ENSG00000167536 | 6.598204782 | 6.787424764 | protein_coding | 17 | 27224799  | 27230089  | DHRS13   |
| ENSG00000167543 | 7.712290964 | 7.887034762 | protein_coding | 17 | 27895739  | 27900172  | TP53I13  |
| ENSG00000167548 | 11.0104901  | 11.01275647 | protein_coding | 12 | 49412758  | 49453557  | MLL2     |
| ENSG00000167549 | 6.496213887 | 6.246885341 | protein_coding | 17 | 27941774  | 27949917  | CORO6    |
| ENSG00000167550 | 5.889353623 | 6.737844962 | protein_coding | 12 | 49458468  | 49463808  | RHEBL1   |
| ENSG00000167552 | 9.30119149  | 10.32407756 | protein_coding | 12 | 49578579  | 49583107  | TUBA1A   |
| ENSG00000167553 | 10.24214716 | 10.46912676 | protein_coding | 12 | 49582519  | 49667116  | TUBA1C   |
| ENSG00000167554 | 6.727618145 | 6.99159092  | protein_coding | 19 | 52839498  | 52870375  | ZNF610   |
| ENSG00000167555 | 8.801295662 | 9.126421125 | protein_coding | 19 | 52901102  | 52921657  | ZNF528   |
| ENSG00000167562 | 7.413224588 | 7.582164879 | protein_coding | 19 | 53073526  | 53090427  | ZNF701   |
| ENSG00000167565 | 6.244259325 | 6.445267191 | protein_coding | 19 | 40946749  | 40950282  | SERTAD3  |
| ENSG00000167566 | 9.26675844  | 9.425497321 | protein_coding | 12 | 50184929  | 50222533  | NCKAP5L  |
| ENSG00000167578 | 5.649112675 | 5.259915406 | protein_coding | 19 | 41277553  | 41302847  | RAB4B    |
| ENSG00000167588 | 2.928422289 | 2.420525079 | protein_coding | 12 | 50497602  | 50505102  | GPD1     |
| ENSG00000167595 | 8.66984994  | 8.506198656 | protein_coding | 19 | 36249044  | 36260766  | C19orf55 |
| ENSG00000167600 | 4.437288965 | 4.342020395 | protein_coding | 19 | 41699115  | 41713443  | CYP2S1   |
| ENSG00000167601 | 9.597483841 | 9.315729406 | protein_coding | 19 | 41725108  | 41767670  | AXL      |
| ENSG00000167604 | 6.35766608  | 6.316088276 | protein_coding | 19 | 36379143  | 36393185  | NFKBID   |
| ENSG00000167608 | 6.535310252 | 4.202780776 | protein_coding | 19 | 54663846  | 54676944  | TMC4     |
| ENSG00000167612 | 3.211941663 | 3.532712221 | protein_coding | 12 | 52281744  | 52285448  | ANKRD33  |
| ENSG00000167614 | 4.883502971 | 3.906303962 | protein_coding | 19 | 54926373  | 54948080  | TTYH1    |
| ENSG00000167615 | 11.61901592 | 11.59146528 | protein_coding | 19 | 54960065  | 54973217  | LENG8    |
| ENSG00000167617 | 6.616550626 | 4.075511708 | protein_coding | 19 | 54976210  | 54984411  | CDC42EP5 |
| ENSG00000167619 | 4.568725997 | 4.342020395 | protein_coding | 19 | 42817477  | 42829214  | TMEM145  |
| ENSG00000167625 | 6.393570237 | 6.475832214 | protein_coding | 19 | 42724448  | 42732353  | ZNF526   |
| ENSG00000167632 | 7.615275323 | 7.65742733  | protein_coding | 8  | 140742586 | 141468678 | TRAPPC9  |
| ENSG00000167634 | 0.499066092 | 0.697730409 | protein_coding | 19 | 55434877  | 55477611  | NLRP7    |
| ENSG00000167635 | 10.051359   | 9.864280473 | protein_coding | 19 | 36705504  | 36729673  | ZNF146   |
| ENSG00000167637 | 6.567100227 | 6.787424764 | protein_coding | 19 | 44331444  | 44353307  | ZNF283   |
| ENSG00000167642 | 9.904181598 | 7.36802772  | protein_coding | 19 | 38755098  | 38783253  | SPINT2   |
| ENSG00000167645 | 8.552470601 | 8.754928172 | protein_coding | 19 | 38794200  | 38806606  | YIF1B    |
| ENSG00000167646 | 7.893726093 | 7.343375265 | protein_coding | 19 | 55670031  | 55678090  | C19orf51 |
| ENSG00000167653 | 2.847891871 | 2.039052734 | protein_coding | 8  | 143751726 | 143764142 | PSCA     |
| ENSG00000167654 | 1.799000381 | 2.144285137 | protein_coding | 19 | 3880618   | 3928076   | ATCAY    |
| ENSG00000167656 | 4.543379137 | 0           | protein_coding | 8  | 143866296 | 143868008 | LY6D     |
| ENSG00000167657 | 10.18899434 | 10.53319908 | protein_coding | 19 | 3958452   | 3971038   | DAPK3    |
| ENSG00000167658 | 15.94761114 | 15.75055344 | protein_coding | 19 | 3972316   | 3985461   | EEF2     |
| ENSG00000167664 | 0           | 0.390640832 | protein_coding | 19 | 4292237   | 4302428   | TMIGD2   |
| ENSG00000167670 | 10.18746114 | 10.57703147 | protein_coding | 19 | 4402659   | 4443394   | CHAF1A   |
| ENSG00000167671 | 10.068119   | 10.39009024 | protein_coding | 19 | 4445006   | 4457791   | UBXN6    |
| ENSG00000167674 | 10.17152198 | 10.22222054 | protein_coding | 19 | 4472255   | 4502213   |          |
| ENSG00000167676 | 8.460675529 | 5.47691899  | protein_coding | 19 | 4502204   | 4517716   | PLIN4    |
| ENSG00000167680 | 9.090943324 | 8.887777807 | protein_coding | 19 | 4542600   | 4558507   | SEMA6B   |

|                 |             |             |                  |    |           |           |          |
|-----------------|-------------|-------------|------------------|----|-----------|-----------|----------|
| ENSG00000167685 | 8.956980309 | 8.956216712 | protein_coding   | 19 | 56652556  | 56672261  | ZNF444   |
| ENSG00000167693 | 10.21531405 | 9.974965329 | protein_coding   | 17 | 702581    | 883010    | NXN      |
| ENSG00000167695 | 8.899456749 | 9.375039375 | protein_coding   | 17 | 635847    | 646074    | FAM57A   |
| ENSG00000167699 | 9.212512411 | 9.890987074 | protein_coding   | 17 | 662550    | 686505    | GLOD4    |
| ENSG00000167700 | 7.952677993 | 7.920752191 | protein_coding   | 8  | 145734457 | 145736569 | MFSD3    |
| ENSG00000167701 | 2.57521082  | 3.133298822 | protein_coding   | 8  | 145728356 | 145732557 | GPT      |
| ENSG00000167702 | 6.733233509 | 6.708116507 | protein_coding   | 8  | 145691426 | 145699585 | KIFC2    |
| ENSG00000167703 | 9.225519491 | 8.591248608 | protein_coding   | 17 | 1477666   | 1532180   | SLC43A2  |
| ENSG00000167705 | 6.92698535  | 7.246248121 | protein_coding   | 17 | 1549444   | 1553352   | RILP     |
| ENSG00000167711 | 3.950976309 | 3.027231696 | protein_coding   | 17 | 1646130   | 1658560   | SERPINF2 |
| ENSG00000167716 | 9.971057625 | 10.51920468 | protein_coding   | 17 | 1619817   | 1641893   | WDR81    |
| ENSG00000167720 | 6.364918751 | 6.699508919 | protein_coding   | 17 | 2207248   | 2228554   | SRR      |
| ENSG00000167721 | 10.37335233 | 10.96530032 | protein_coding   | 17 | 2225992   | 2240678   | TSR1     |
| ENSG00000167723 | 5.331395195 | 5.908941696 | protein_coding   | 17 | 3413796   | 3461289   | TRPV3    |
| ENSG00000167733 | 5.575999561 | 6.192713747 | protein_coding   | 19 | 5681035   | 5688532   | HSD11B1L |
| ENSG00000167740 | 7.695130106 | 8.214555999 | protein_coding   | 17 | 4046462   | 4060989   | CYB5D2   |
| ENSG00000167741 | 0.499066092 | 0           | protein_coding   | 17 | 4460224   | 4463876   | GGT6     |
| ENSG00000167744 | 3.448790144 | 1.353254395 | protein_coding   | 19 | 49564397  | 49567124  | NTF4     |
| ENSG00000167747 | 9.600559263 | 9.700312778 | protein_coding   | 19 | 51300962  | 51307974  | C19orf48 |
| ENSG00000167748 | 0.499066092 | 0           | protein_coding   | 19 | 51322404  | 51327043  | KLK1     |
| ENSG00000167754 | 1.16343121  | 0           | protein_coding   | 19 | 51446561  | 51456344  | KLK5     |
| ENSG00000167755 | 6.305850085 | 0.697730409 | protein_coding   | 19 | 51461888  | 51472929  | KLK6     |
| ENSG00000167765 | 2.10647801  | 2.971122874 | protein_coding   | 19 | 52095036  | 52097633  |          |
| ENSG00000167766 | 9.31529953  | 9.448796166 | protein_coding   | 19 | 53115620  | 53193741  | ZNF83    |
| ENSG00000167767 | 10.65540882 | 10.49453849 | protein_coding   | 12 | 52562780  | 52585784  | KRT80    |
| ENSG00000167770 | 10.0287051  | 10.17952981 | protein_coding   | 11 | 63753325  | 63769283  | OTUB1    |
| ENSG00000167771 | 4.883502971 | 4.676215056 | protein_coding   | 11 | 63678693  | 63684316  | RCOR2    |
| ENSG00000167772 | 8.2535526   | 8.094946597 | protein_coding   | 19 | 8429011   | 8439257   | ANGPTL4  |
| ENSG00000167774 | 8.847332411 | 9.701390938 | protein_coding   | 19 | 8376234   | 8386280   | NDUFA7   |
| ENSG00000167775 | 11.04137297 | 11.57832085 | protein_coding   | 19 | 8367011   | 8373240   | CD320    |
| ENSG00000167778 | 9.545769354 | 9.288725373 | protein_coding   | 12 | 53458388  | 53473204  | SPRYD3   |
| ENSG00000167779 | 9.052156467 | 7.716212954 | protein_coding   | 12 | 53491220  | 53496129  | IGFBP6   |
| ENSG00000167780 | 1.407729925 | 0           | protein_coding   | 12 | 53497302  | 53518322  | SOAT2    |
| ENSG00000167785 | 8.793254009 | 8.885882287 | protein_coding   | 19 | 8920382   | 8933565   | ZNF558   |
| ENSG00000167791 | 1.16343121  | 0           | protein_coding   | 11 | 67286409  | 67290899  | CABP2    |
| ENSG00000167792 | 12.32463616 | 12.52958821 | protein_coding   | 11 | 67374323  | 67380006  | NDUFV1   |
| ENSG00000167797 | 10.60154986 | 10.953358   | protein_coding   | 11 | 67273968  | 67276120  | CDK2AP2  |
| ENSG00000167799 | 7.464764762 | 8.127396674 | protein_coding   | 11 | 67395409  | 67397401  | NUDT8    |
| ENSG00000167800 | 1.616589159 | 1.802319292 | protein_coding   | 11 | 67398774  | 67407031  | TBX10    |
| ENSG00000167807 | 8.009315251 | 8.595894166 | protein_coding   | 19 | 10416103  | 10426691  | FDX1L    |
| ENSG00000167815 | 11.14242766 | 11.5407157  | protein_coding   | 19 | 12907634  | 12912694  | PRDX2    |
| ENSG00000167840 | 7.46813618  | 7.789016615 | protein_coding   | 17 | 5008930   | 5026397   | ZNF232   |
| ENSG00000167842 | 8.56354495  | 9.351881826 | protein_coding   | 17 | 5390247   | 5394134   | MIS12    |
| ENSG00000167850 | 0.499066092 | 1.16600992  | protein_coding   | 17 | 72537247  | 72542282  | CD300C   |
| ENSG00000167858 | 0.499066092 | 1.16600992  | protein_coding   | 17 | 6701312   | 6735080   | TEKT1    |
| ENSG00000167861 | 4.491309013 | 1.925536307 | protein_coding   | 17 | 72946837  | 72969261  | C17orf28 |
| ENSG00000167862 | 7.96466218  | 8.099860884 | protein_coding   | 17 | 73008780  | 73017355  | ICT1     |
| ENSG00000167863 | 9.225519491 | 9.726498497 | protein_coding   | 17 | 73032145  | 73043074  | ATP5H    |
| ENSG00000167874 | 3.871730003 | 3.081239798 | protein_coding   | 17 | 7758384   | 7759415   | TMEM88   |
| ENSG00000167880 | 9.046529371 | 7.780879746 | protein_coding   | 17 | 74002927  | 74023507  | EVPL     |
| ENSG00000167881 | 9.931305133 | 9.754816173 | protein_coding   | 17 | 74035187  | 74068607  | SRP68    |
| ENSG00000167889 | 6.892270075 | 7.263870273 | protein_coding   | 17 | 74864538  | 74946475  | MGAT5B   |
| ENSG00000167895 | 2.928422289 | 1.802319292 | protein_coding   | 17 | 76126859  | 76139049  | TMC8     |
| ENSG00000167900 | 10.3309294  | 10.23790941 | protein_coding   | 17 | 76170160  | 76183314  | TK1      |
| ENSG00000167904 | 6.393570237 | 6.064512706 | protein_coding   | 8  | 56608983  | 56685966  | TMEM68   |
| ENSG00000167910 | 0           | 0.950786998 | protein_coding   | 8  | 59402737  | 59412795  | CYP7A1   |
| ENSG00000167912 | 0           | 3.813624741 | processed_transc | 8  | 60031599  | 60033905  |          |
| ENSG00000167914 | 0.499066092 | 0           | protein_coding   | 17 | 38119226  | 38134019  | GSDMA    |
| ENSG00000167920 | 6.515894502 | 6.819555981 | protein_coding   | 17 | 38975358  | 38992522  | TMEM99   |
| ENSG00000167925 | 8.282565319 | 8.242970684 | protein_coding   | 17 | 40341106  | 40346550  | GHDC     |
| ENSG00000167930 | 10.30335447 | 10.83554492 | protein_coding   | 16 | 284545    | 319942    | ITFG3    |
| ENSG00000167941 | 0.499066092 | 0           | protein_coding   | 17 | 41831103  | 41836156  | SOST     |
| ENSG00000167945 | 1.407729925 | 1.353254395 | protein_coding   | 16 | 855443    | 863861    | PRR25    |

|                 |             |             |                |    |           |           |           |
|-----------------|-------------|-------------|----------------|----|-----------|-----------|-----------|
| ENSG00000167962 | 10.23820324 | 10.25819969 | protein_coding | 16 | 2047655   | 2059824   | ZNF598    |
| ENSG00000167964 | 5.40360309  | 5.03207928  | protein_coding | 16 | 2190804   | 2204166   | RAB26     |
| ENSG00000167965 | 9.74513791  | 9.888622555 | protein_coding | 16 | 2254249   | 2259417   | MLST8     |
| ENSG00000167967 | 9.077762113 | 9.315025211 | protein_coding | 16 | 2273560   | 2285743   | E4F1      |
| ENSG00000167968 | 4.292665995 | 4.810179682 | protein_coding | 16 | 2285817   | 2288712   | DNASE1L2  |
| ENSG00000167969 | 9.232475031 | 9.417646668 | protein_coding | 16 | 2289396   | 2302301   | EC1       |
| ENSG00000167971 | 1.16343121  | 2.242360793 | protein_coding | 16 | 2227184   | 2246526   | CASKIN1   |
| ENSG00000167972 | 11.46638963 | 11.64399908 | protein_coding | 16 | 2325882   | 2390747   | ABCA3     |
| ENSG00000167977 | 9.779466207 | 9.611339686 | protein_coding | 16 | 2732476   | 2759031   | KCTD5     |
| ENSG00000167978 | 13.64492996 | 13.62190384 | protein_coding | 16 | 2802330   | 2821411   | SRRM2     |
| ENSG00000167981 | 5.175139844 | 4.342020395 | protein_coding | 16 | 3486104   | 3493537   | ZNF597    |
| ENSG00000167984 | 4.464551814 | 4.794098771 | protein_coding | 16 | 3589038   | 3627401   | NLRC3     |
| ENSG00000167985 | 6.023726639 | 6.539915281 | protein_coding | 11 | 61197514  | 61215001  | SDHAF2    |
| ENSG00000167986 | 12.25266173 | 12.23179918 | protein_coding | 11 | 61066923  | 61110068  | DDB1      |
| ENSG00000167987 | 8.774313977 | 8.761145731 | protein_coding | 11 | 60897728  | 60929089  | VPS37C    |
| ENSG00000167992 | 3.871730003 | 4.127774132 | protein_coding | 11 | 61025762  | 61062896  | VWCE      |
| ENSG00000167994 | 7.527512071 | 7.664078611 | protein_coding | 11 | 61664773  | 61687741  | RAB31L1   |
| ENSG00000167995 | 4.689181911 | 5.283144778 | protein_coding | 11 | 61717293  | 61732987  | BEST1     |
| ENSG00000167996 | 12.38752564 | 12.48121023 | protein_coding | 11 | 61727190  | 61735132  | FTH1      |
| ENSG00000168000 | 5.316509574 | 5.506827567 | protein_coding | 11 | 62457747  | 62477317  | BSCL2     |
| ENSG00000168002 | 8.655134734 | 9.281534232 | protein_coding | 11 | 62529016  | 62534182  | POLR2G    |
| ENSG00000168003 | 11.90507449 | 11.93316881 | protein_coding | 11 | 62623518  | 62656352  | SLC3A2    |
| ENSG00000168005 | 8.2535526   | 8.090015513 | protein_coding | 11 | 63580860  | 63595190  | C11orf84  |
| ENSG00000168010 | 8.135536446 | 9.133627746 | protein_coding | 11 | 72525353  | 72554719  | ATG16L2   |
| ENSG00000168014 | 8.593182305 | 8.680338024 | protein_coding | 11 | 73723763  | 73882255  | C2CD3     |
| ENSG00000168016 | 8.628263112 | 9.101319098 | protein_coding | 3  | 36868311  | 36986548  | TRANK1    |
| ENSG00000168026 | 4.593635215 | 4.990346085 | protein_coding | 3  | 39149152  | 39180394  | TTC21A    |
| ENSG00000168028 | 10.71621744 | 10.93491337 | protein_coding | 3  | 39448180  | 39453929  | RP5A      |
| ENSG00000168032 | 1.407729925 | 1.353254395 | protein_coding | 3  | 40428647  | 40470110  | ENTPD3    |
| ENSG00000168036 | 11.41665449 | 11.37864174 | protein_coding | 3  | 41236328  | 41301587  | CTNNB1    |
| ENSG00000168038 | 6.283060568 | 6.030599799 | protein_coding | 3  | 41288090  | 42003922  | ULK4      |
| ENSG00000168040 | 7.581430769 | 8.015686953 | protein_coding | 11 | 70049269  | 70053496  | FADD      |
| ENSG00000168056 | 9.615838797 | 10.46817693 | protein_coding | 11 | 65306031  | 65326401  | LTBP3     |
| ENSG00000168060 | 0.869158192 | 2.420525079 | protein_coding | 11 | 64812290  | 64826021  | NAALADL1  |
| ENSG00000168061 | 7.978913023 | 7.982367515 | protein_coding | 11 | 64808373  | 64812300  | SAC3D1    |
| ENSG00000168062 | 6.738827102 | 7.135740508 | protein_coding | 11 | 64755415  | 64764517  | BATF2     |
| ENSG00000168065 | 0.869158192 | 0.697730409 | protein_coding | 11 | 64323098  | 64340347  | SLC22A11  |
| ENSG00000168066 | 11.76493205 | 11.37931557 | protein_coding | 11 | 64532078  | 64546258  | SF1       |
| ENSG00000168067 | 8.320363082 | 7.999999944 | protein_coding | 11 | 64556290  | 64570713  | MAP4K2    |
| ENSG00000168070 | 3.652182994 | 3.570966319 | protein_coding | 11 | 64704989  | 64739557  | C11orf85  |
| ENSG00000168071 | 7.543580762 | 6.923001245 | protein_coding | 11 | 64107690  | 64125006  | CCDC88B   |
| ENSG00000168078 | 8.45218826  | 8.802929991 | protein_coding | 8  | 27667137  | 27695612  | PBK       |
| ENSG00000168079 | 0.869158192 | 0           | protein_coding | 8  | 27727399  | 27850244  | SCARA5    |
| ENSG00000168081 | 0           | 0.390640832 | protein_coding | 8  | 28174503  | 28200872  | PNOC      |
| ENSG00000168090 | 10.30004761 | 9.956570886 | protein_coding | 7  | 99686577  | 99689823  | COPS6     |
| ENSG00000168092 | 10.65281865 | 10.38741313 | protein_coding | 11 | 117014983 | 117047610 | PAFAH1B2  |
| ENSG00000168096 | 7.399163791 | 7.714077892 | protein_coding | 16 | 4746513   | 4784379   | ANKS3     |
| ENSG00000168101 | 6.917151646 | 7.56568256  | protein_coding | 16 | 4743695   | 4745860   | NUDT16L1  |
| ENSG00000168116 | 6.059927234 | 6.563824016 | protein_coding | 6  | 56911347  | 56920023  | KIAA1586  |
| ENSG00000168118 | 7.413224588 | 7.668495823 | protein_coding | 1  | 229406822 | 229441641 | RAB4A     |
| ENSG00000168122 | 0           | 0.390640832 | pseudogene     | 21 | 14467626  | 14486111  | ZNF355P   |
| ENSG00000168124 | 2.471521042 | 2.420525079 | protein_coding | 16 | 3254247   | 3255188   | OR1F1     |
| ENSG00000168126 | 0           | 0.950786998 | pseudogene     | 6  | 27905243  | 27906181  | OR2W6P    |
| ENSG00000168131 | 0           | 0.390640832 | protein_coding | 6  | 27878963  | 27880174  | OR2B2     |
| ENSG00000168137 | 10.79182236 | 10.42542696 | protein_coding | 3  | 9439299   | 9520924   | SETD5     |
| ENSG00000168140 | 9.636961872 | 10.0885135  | protein_coding | 16 | 4421849   | 4433529   | VASN      |
| ENSG00000168148 | 0.869158192 | 0.390640832 | protein_coding | 1  | 228612546 | 228613026 | HIST3H3   |
| ENSG00000168152 | 5.331395195 | 5.516660875 | protein_coding | 4  | 83821837  | 83841438  | THAP9     |
| ENSG00000168158 | 0           | 0.697730409 | protein_coding | 16 | 3405889   | 3406924   | OR2C1     |
| ENSG00000168159 | 10.36885012 | 10.58902301 | protein_coding | 1  | 228674762 | 228683467 | RNF187    |
| ENSG00000168172 | 6.749949642 | 7.309836726 | protein_coding | 8  | 42752075  | 42883255  | HOOK3     |
| ENSG00000168175 | 9.770619129 | 9.630144961 | protein_coding | 14 | 55518349  | 55532931  | MAPK1IP1L |
| ENSG00000168209 | 11.0693905  | 10.9655247  | protein_coding | 10 | 74033678  | 74035794  | DDIT4     |

|                 |             |             |                |    |           |           |           |
|-----------------|-------------|-------------|----------------|----|-----------|-----------|-----------|
| ENSG00000168214 | 9.976986307 | 10.19300686 | protein_coding | 4  | 26165077  | 26436541  | RBPJ      |
| ENSG00000168216 | 7.165790811 | 6.919299326 | protein_coding | 6  | 70385694  | 70507003  | LMBRD1    |
| ENSG00000168228 | 6.573375019 | 6.414040573 | protein_coding | 4  | 25314407  | 25372005  | ZCCHC4    |
| ENSG00000168234 | 7.190493718 | 7.255086103 | protein_coding | 18 | 21572737  | 21715573  | TTC39C    |
| ENSG00000168237 | 4.261916566 | 5.045726316 | protein_coding | 3  | 52321105  | 52329272  | GLYCK     |
| ENSG00000168242 | 1.16343121  | 1.518964905 | protein_coding | 6  | 26273144  | 26273622  | HIST1H2BI |
| ENSG00000168243 | 0.499066092 | 0           | protein_coding | 1  | 235710987 | 235814054 | GNG4      |
| ENSG00000168246 | 8.239811039 | 8.557113361 | protein_coding | 5  | 171636644 | 171711075 | UBTD2     |
| ENSG00000168255 | 6.26766507  | 6.136428444 | protein_coding | 7  | 102178365 | 102232891 | POLR2J3   |
| ENSG00000168256 | 8.807962967 | 8.401295742 | protein_coding | 17 | 40169038  | 40177659  | NKIRAS2   |
| ENSG00000168259 | 9.475476535 | 9.423538659 | protein_coding | 17 | 40128439  | 40169715  | DNAJC7    |
| ENSG00000168260 | 0.869158192 | 1.353254395 | protein_coding | 14 | 50550369  | 50559361  | C14orf183 |
| ENSG00000168263 | 0.499066092 | 1.518964905 | protein_coding | 9  | 2717239   | 2730037   | KCNV2     |
| ENSG00000168264 | 9.792972033 | 9.643108201 | protein_coding | 1  | 234740015 | 234745271 | IRF2BP2   |
| ENSG00000168268 | 9.710684602 | 9.656512011 | protein_coding | 3  | 52558386  | 52569070  | NT5DC2    |
| ENSG00000168269 | 0.499066092 | 1.16600992  | protein_coding | 5  | 169532901 | 169536727 | FOXI1     |
| ENSG00000168273 | 6.212449006 | 6.966698819 | protein_coding | 3  | 52568029  | 52613253  | C3orf78   |
| ENSG00000168274 | 3.335220907 | 4.17820932  | protein_coding | 6  | 26217165  | 26217711  | HIST1H2AE |
| ENSG00000168275 | 7.44778847  | 8.046558348 | protein_coding | 1  | 234509202 | 234519795 | C1orf31   |
| ENSG00000168280 | 0           | 0.697730409 | protein_coding | 2  | 149632819 | 149883273 | KIF5C     |
| ENSG00000168282 | 5.538004898 | 5.66550919  | protein_coding | 14 | 50087489  | 50090198  | MGAT2     |
| ENSG00000168283 | 9.423456371 | 9.269226422 | protein_coding | 10 | 22605381  | 22620413  | BMI1      |
| ENSG00000168286 | 8.13977083  | 8.401295742 | protein_coding | 16 | 67876213  | 67878097  | THAP11    |
| ENSG00000168288 | 9.758967401 | 9.690572902 | protein_coding | 2  | 150426148 | 150444330 | MMADHC    |
| ENSG00000168291 | 9.235445742 | 9.229419632 | protein_coding | 3  | 58413357  | 58419584  | PDHB      |
| ENSG00000168297 | 8.876804446 | 8.936206949 | protein_coding | 3  | 58318607  | 58411748  | PXK       |
| ENSG00000168298 | 4.517578978 | 5.306006045 | protein_coding | 6  | 26156559  | 26157343  | HIST1H1E  |
| ENSG00000168300 | 7.311793575 | 7.701200733 | protein_coding | 8  | 52730140  | 52811735  | PCMTD1    |
| ENSG00000168301 | 6.032862302 | 5.840125386 | protein_coding | 3  | 58477841  | 58488087  | KCTD6     |
| ENSG00000168303 | 8.805299741 | 8.738215808 | protein_coding | 7  | 40172342  | 40174258  | C7orf11   |
| ENSG00000168306 | 5.175139844 | 4.932754837 | protein_coding | 3  | 58490863  | 58523046  | ACOX2     |
| ENSG00000168309 | 1.407729925 | 0           | protein_coding | 3  | 58549844  | 58613337  | FAM107A   |
| ENSG00000168310 | 8.085926212 | 8.525807191 | protein_coding | 4  | 185308867 | 185395734 | IRF2      |
| ENSG00000168314 | 0           | 0.390640832 | protein_coding | 3  | 39508689  | 39567859  | MOBP      |
| ENSG00000168334 | 1.407729925 | 1.16600992  | protein_coding | 3  | 39224701  | 39234087  | XIRP1     |
| ENSG00000168350 | 3.211941663 | 2.144285137 | protein_coding | 14 | 100612756 | 100626500 | DEGS2     |
| ENSG00000168367 | 1.16343121  | 0           | protein_coding | 16 | 86369374  | 86379285  |           |
| ENSG00000168374 | 11.33129517 | 11.33015167 | protein_coding | 3  | 57557090  | 57583947  | ARF4      |
| ENSG00000168385 | 11.48793241 | 11.25522647 | protein_coding | 2  | 242254515 | 242293442 | 2-sep     |
| ENSG00000168386 | 8.441937187 | 9.112709611 | protein_coding | 3  | 99548985  | 99833357  | FILIP1L   |
| ENSG00000168389 | 6.212449006 | 6.619638408 | protein_coding | 1  | 40420802  | 40435638  | MFSD2A    |
| ENSG00000168393 | 8.977234519 | 9.0649234   | protein_coding | 2  | 242615157 | 242626406 | DTYMK     |
| ENSG00000168394 | 9.809013881 | 10.32162561 | protein_coding | 6  | 32812986  | 32821755  | TAP1      |
| ENSG00000168395 | 8.143992822 | 7.877527247 | protein_coding | 2  | 242641450 | 242668893 | ING5      |
| ENSG00000168397 | 9.814983883 | 9.828213847 | protein_coding | 2  | 242576628 | 242613272 | ATG4B     |
| ENSG00000168398 | 7.420203928 | 6.835357159 | protein_coding | 14 | 96671016  | 96710666  | BDKRB2    |
| ENSG00000168404 | 8.403714162 | 7.782918269 | protein_coding | 16 | 74705755  | 74734789  | MLKL      |
| ENSG00000168405 | 2.238690726 | 2.788380093 | protein_coding | 6  | 25081295  | 25218698  | CMAHP     |
| ENSG00000168411 | 10.13274625 | 10.05895686 | protein_coding | 16 | 74655297  | 74700779  | RFWD3     |
| ENSG00000168412 | 0           | 0.390640832 | protein_coding | 4  | 187347700 | 187476721 | MTNR1A    |
| ENSG00000168427 | 2.238690726 | 1.16600992  | protein_coding | 2  | 239047363 | 239061588 | KLHL30    |
| ENSG00000168434 | 8.103376106 | 7.864110577 | protein_coding | 16 | 23399814  | 23464501  | COG7      |
| ENSG00000168438 | 7.834876234 | 7.426571535 | protein_coding | 6  | 110501344 | 110575478 | CDC40     |
| ENSG00000168439 | 11.68732373 | 11.44419103 | protein_coding | 11 | 63952744  | 63972015  | STIP1     |
| ENSG00000168447 | 0.869158192 | 0.697730409 | protein_coding | 16 | 23289552  | 23392620  | SCNN1B    |
| ENSG00000168453 | 6.469548347 | 4.202780776 | protein_coding | 8  | 21971928  | 21990897  | HR        |
| ENSG00000168454 | 0.499066092 | 1.16600992  | protein_coding | 18 | 9885763   | 9888377   | TXNDC2    |
| ENSG00000168461 | 10.17255565 | 9.33252778  | protein_coding | 18 | 9708228   | 9862553   | RAB31     |
| ENSG00000168476 | 9.138269512 | 8.870627795 | protein_coding | 8  | 21995533  | 21999464  | REEP4     |
| ENSG00000168477 | 7.149084042 | 7.03670965  | protein_coding | 6  | 32008931  | 32083111  | TNXB      |
| ENSG00000168481 | 0.869158192 | 0.697730409 | protein_coding | 8  | 22004338  | 22014597  | LGI3      |
| ENSG00000168487 | 9.895443335 | 10.38338814 | protein_coding | 8  | 22022249  | 22069839  | BMP1      |
| ENSG00000168488 | 11.56217774 | 11.64455972 | protein_coding | 16 | 28834356  | 28848558  | ATXN2L    |



|                 |             |             |                |    |           |           |          |
|-----------------|-------------|-------------|----------------|----|-----------|-----------|----------|
| ENSG00000168490 | 3.911897206 | 3.64455972  | protein_coding | 8  | 22077222  | 22089854  | PHYHIP   |
| ENSG00000168491 | 2.238690726 | 2.501982735 | protein_coding | 4  | 186366336 | 186392913 | CCDC110  |
| ENSG00000168495 | 8.544507981 | 8.718115101 | protein_coding | 8  | 22102617  | 22109485  | POLR3D   |
| ENSG00000168496 | 9.479658457 | 9.831664428 | protein_coding | 11 | 61560109  | 61564716  | FEN1     |
| ENSG00000168497 | 4.230497448 | 2.334191469 | protein_coding | 2  | 192699028 | 192711981 | SDPR     |
| ENSG00000168502 | 8.927893208 | 8.785751426 | protein_coding | 18 | 8706513   | 8832776   | CCDC165  |
| ENSG00000168505 | 0.869158192 | 0.390640832 | protein_coding | 2  | 237073879 | 237077012 | GBX2     |
| ENSG00000168517 | 5.858855738 | 5.98174124  | protein_coding | 17 | 43238271  | 43247406  | HEXIM2   |
| ENSG00000168522 | 8.096857104 | 8.706348549 | protein_coding | 8  | 42889337  | 42940931  | FNTA     |
| ENSG00000168528 | 10.13963411 | 7.819127564 | protein_coding | 1  | 31882412  | 31907525  | SERINC2  |
| ENSG00000168538 | 7.751556534 | 7.862183683 | protein_coding | 4  | 184580420 | 184634745 | TRAPPC11 |
| ENSG00000168542 | 1.407729925 | 2.501982735 | protein_coding | 2  | 189839046 | 189877472 | COL3A1   |
| ENSG00000168556 | 6.228441838 | 6.619638408 | protein_coding | 4  | 184426147 | 184432249 | ING2     |
| ENSG00000168564 | 7.258272112 | 7.607691112 | protein_coding | 4  | 184365744 | 184369351 | CDKN2AIP |
| ENSG00000168566 | 7.983632192 | 8.219079902 | protein_coding | 6  | 7590432   | 7612091   | SNRNP48  |
| ENSG00000168569 | 7.612231145 | 7.73107057  | protein_coding | 11 | 62539101  | 62559493  | TMEM223  |
| ENSG00000168575 | 8.680062001 | 8.617758557 | protein_coding | 8  | 42273993  | 42397069  | SLC20A2  |
| ENSG00000168589 | 0           | 0.950786998 | protein_coding | 16 | 80574631  | 80584657  | DYNLRB2  |
| ENSG00000168591 | 8.177331204 | 8.302443832 | protein_coding | 17 | 42264336  | 42269098  | TMUB2    |
| ENSG00000168594 | 0.499066092 | 0           | protein_coding | 4  | 175750819 | 175899331 | ADAM29   |
| ENSG00000168597 | 6.364918751 | 6.365895578 | protein_coding | 17 | 42253354  | 42264082  | C17orf65 |
| ENSG00000168610 | 10.73278039 | 10.51583798 | protein_coding | 17 | 40465342  | 40540449  | STAT3    |
| ENSG00000168612 | 7.768062907 | 7.705505903 | protein_coding | 20 | 44509866  | 44513905  | ZSWIM1   |
| ENSG00000168614 | 7.420203928 | 7.724721747 | protein_coding | 1  | 144811744 | 144830302 | NBPF9    |
| ENSG00000168615 | 11.36288118 | 11.43173959 | protein_coding | 8  | 38854388  | 38962663  | ADAM9    |
| ENSG00000168619 | 0           | 0.390640832 | protein_coding | 8  | 39442008  | 39587584  | ADAM18   |
| ENSG00000168621 | 0           | 0.390640832 | protein_coding | 5  | 37812779  | 37839788  | GDNF     |
| ENSG00000168634 | 1.16343121  | 3.183544561 | protein_coding | 20 | 44330655  | 44337456  | WFDC13   |
| ENSG00000168646 | 5.036678094 | 5.726093467 | protein_coding | 17 | 63524685  | 63557765  | AXIN2    |
| ENSG00000168653 | 9.740266097 | 10.46754337 | protein_coding | 1  | 39491990  | 39500308  | NDUFS5   |
| ENSG00000168658 | 1.16343121  | 0.390640832 | protein_coding | 2  | 98703579  | 98929762  | VWA3B    |
| ENSG00000168661 | 4.962122459 | 5.125003832 | protein_coding | 19 | 35417807  | 35436074  | ZNF30    |
| ENSG00000168672 | 9.886021803 | 8.17474298  | protein_coding | 8  | 127564687 | 127570638 | FAM84B   |
| ENSG00000168675 | 1.16343121  | 1.16600992  | protein_coding | 18 | 13218786  | 13652753  | C18orf1  |
| ENSG00000168676 | 4.261916566 | 3.368666104 | protein_coding | 16 | 67323331  | 67360666  | KCTD19   |
| ENSG00000168679 | 2.10647801  | 2.501982735 | protein_coding | 1  | 110905470 | 110933704 | SLC16A4  |
| ENSG00000168685 | 10.56028737 | 10.05769455 | protein_coding | 5  | 35852797  | 35879705  | IL7R     |
| ENSG00000168701 | 7.938164312 | 8.599368544 | protein_coding | 16 | 67261006  | 67263181  | TMEM208  |
| ENSG00000168702 | 1.16343121  | 0.390640832 | protein_coding | 2  | 140988992 | 142889270 | LRP1B    |
| ENSG00000168703 | 0           | 0.390640832 | protein_coding | 20 | 43752066  | 43753106  | WFDC12   |
| ENSG00000168710 | 10.78710593 | 10.68779701 | protein_coding | 1  | 110527308 | 110566357 | AHCYL1   |
| ENSG00000168724 | 9.862515511 | 9.488685117 | protein_coding | 5  | 34929698  | 34959069  | DNAJC21  |
| ENSG00000168734 | 8.259402007 | 9.494294562 | protein_coding | 20 | 43160426  | 43252888  | PKIG     |
| ENSG00000168743 | 0           | 0.697730409 | protein_coding | 4  | 106815932 | 106925184 | NPNT     |
| ENSG00000168748 | 1.799000381 | 0.390640832 | protein_coding | 16 | 66878282  | 66888056  | CA7      |
| ENSG00000168754 | 2.471521042 | 0           | protein_coding | 2  | 97541620  | 97684175  | FAM178B  |
| ENSG00000168758 | 9.265790136 | 8.154416734 | protein_coding | 2  | 97525453  | 97536494  | SEMA4C   |
| ENSG00000168763 | 8.325948295 | 8.214555999 | protein_coding | 2  | 97481982  | 97499648  | CNNM3    |
| ENSG00000168765 | 8.124895791 | 8.127396674 | protein_coding | 1  | 110198703 | 110208118 | GSTM4    |
| ENSG00000168769 | 7.250461488 | 7.666288907 | protein_coding | 4  | 106067032 | 106200973 | TET2     |
| ENSG00000168778 | 7.308035767 | 6.771086752 | protein_coding | 12 | 124155660 | 124192948 | TCTN2    |
| ENSG00000168779 | 3.603959378 | 5.150490275 | protein_coding | 3  | 157813743 | 157824292 | SHOX2    |
| ENSG00000168781 | 7.845284967 | 7.519971735 | protein_coding | 15 | 43825660  | 43982283  | PPIP5K1  |
| ENSG00000168785 | 8.783815073 | 8.664945797 | protein_coding | 4  | 99391518  | 99579780  | TSPAN5   |
| ENSG00000168787 | 0           | 0.697730409 | protein_coding | 6  | 29364416  | 29365448  | OR12D2   |
| ENSG00000168792 | 6.830742851 | 6.264499759 | protein_coding | 17 | 27887691  | 27894042  | ABHD15   |
| ENSG00000168795 | 7.507990374 | 8.044860491 | protein_coding | 9  | 37438111  | 37465396  | ZBTB5    |
| ENSG00000168802 | 10.07753061 | 9.770824962 | protein_coding | 16 | 69151913  | 69166487  | CHTF8    |
| ENSG00000168803 | 6.687686437 | 6.615068802 | protein_coding | 15 | 43622872  | 43646096  | ADAL     |
| ENSG00000168806 | 7.071412799 | 7.126137778 | protein_coding | 15 | 43619974  | 43622803  | LCMT2    |
| ENSG00000168807 | 9.066685021 | 8.891561392 | protein_coding | 16 | 69221032  | 69342955  | SNTB2    |
| ENSG00000168811 | 4.026095388 | 3.748356452 | protein_coding | 3  | 159706537 | 159713806 | IL12A    |
| ENSG00000168813 | 8.225937332 | 7.877527247 | protein_coding | 19 | 32836514  | 32878572  | ZNF507   |

|                 |             |             |                |    |           |           |               |
|-----------------|-------------|-------------|----------------|----|-----------|-----------|---------------|
| ENSG00000168818 | 7.609180529 | 8.032919217 | protein_coding | 4  | 4417469   | 4544073   | STX18         |
| ENSG00000168824 | 1.407729925 | 0           | protein_coding | 4  | 4349867   | 4420785   |               |
| ENSG00000168826 | 5.458875168 | 5.187895122 | protein_coding | 4  | 4291924   | 4323513   | ZBTB49        |
| ENSG00000168827 | 9.354083505 | 9.281534232 | protein_coding | 3  | 158362067 | 158410364 | GFM1          |
| ENSG00000168828 | 0           | 0.697730409 | protein_coding | 9  | 35869375  | 35870461  | OR13J1        |
| ENSG00000168843 | 0.499066092 | 0           | protein_coding | 4  | 162305049 | 163085187 | FSTL5         |
| ENSG00000168852 | 0           | 0.390640832 | pseudogene     | 13 | 41396432  | 41495885  |               |
| ENSG00000168872 | 8.839544001 | 8.923327429 | protein_coding | 16 | 70380732  | 70407286  | DDX19A        |
| ENSG00000168874 | 5.4452544   | 5.700439663 | protein_coding | 2  | 85978467  | 86015189  | ATOX1         |
| ENSG00000168876 | 6.548110424 | 7.135740508 | protein_coding | 11 | 94226795  | 94232749  | ANKRD49       |
| ENSG00000168878 | 0.869158192 | 0.950786998 | protein_coding | 2  | 85884437  | 85895864  | SFTPB         |
| ENSG00000168883 | 10.00336794 | 9.994448246 | protein_coding | 2  | 85829979  | 85876406  | USP39         |
| ENSG00000168884 | 8.387780826 | 8.525807191 | protein_coding | 4  | 2743375   | 2758103   | TNIP2         |
| ENSG00000168887 | 8.233881494 | 8.099860884 | protein_coding | 2  | 85833777  | 85839189  | C2orf68       |
| ENSG00000168890 | 7.017207048 | 7.575124073 | protein_coding | 2  | 85825671  | 85830319  | TMEM150A      |
| ENSG00000168894 | 9.181013921 | 9.52932336  | protein_coding | 2  | 85822848  | 85824736  | RNF181        |
| ENSG00000168899 | 3.077135474 | 3.027231696 | protein_coding | 2  | 85811531  | 85820535  | VAMP5         |
| ENSG00000168904 | 6.393570237 | 6.398170093 | protein_coding | 15 | 99791567  | 99930934  | LRRC28        |
| ENSG00000168906 | 11.19729137 | 11.75018096 | protein_coding | 2  | 85766288  | 85772403  | MAT2A         |
| ENSG00000168907 | 2.471521042 | 0           | protein_coding | 15 | 42433332  | 42448839  | PLA2G4F       |
| ENSG00000168913 | 3.335220907 | 5.137803333 | protein_coding | 9  | 34521038  | 34523039  | ENHO          |
| ENSG00000168916 | 8.233881494 | 8.371803145 | protein_coding | 5  | 123972608 | 124084500 | ZNF608        |
| ENSG00000168917 | 5.346128795 | 4.7279204   | protein_coding | 3  | 136537489 | 136574734 | TMEM22        |
| ENSG00000168918 | 2.671945279 | 0.390640832 | protein_coding | 2  | 233924677 | 234116549 | INPP5D        |
| ENSG00000168924 | 10.57091017 | 10.16201509 | protein_coding | 4  | 1813206   | 1857974   | LETM1         |
| ENSG00000168925 | 1.16343121  | 0.697730409 | protein_coding | 16 | 75252898  | 75258822  | CTRB1         |
| ENSG00000168928 | 1.799000381 | 0.950786998 | protein_coding | 16 | 75237994  | 75241083  | CTRB2         |
| ENSG00000168936 | 7.873527714 | 8.171634445 | protein_coding | 4  | 1717679   | 1723085   | TMEM129       |
| ENSG00000168938 | 7.80585884  | 8.289597152 | protein_coding | 5  | 122358945 | 122372436 | PPIC          |
| ENSG00000168939 | 1.616589159 | 0.697730409 | protein_coding | X  | 154997474 | 155012121 | SPRY3         |
| ENSG00000168944 | 7.420203928 | 7.408200217 | protein_coding | 5  | 122680579 | 122759286 | CEP120        |
| ENSG00000168952 | 0           | 0.390640832 | protein_coding | 14 | 25278862  | 25519503  | STXBP6        |
| ENSG00000168955 | 0           | 1.16600992  | protein_coding | 2  | 228226872 | 228246711 | TM4SF20       |
| ENSG00000168958 | 8.992533411 | 9.234642156 | protein_coding | 2  | 228189867 | 228222550 | MFF           |
| ENSG00000168961 | 4.230497448 | 4.42790041  | protein_coding | 17 | 25956824  | 25976586  | LGALS9        |
| ENSG00000168967 | 0           | 0.390640832 | pseudogene     | 5  | 22142461  | 22152465  | PMCHL1        |
| ENSG00000168970 | 5.124761037 | 5.137803333 | protein_coding | 15 | 42120283  | 42140353  | JMJD7-PLA2G4B |
| ENSG00000168992 | 1.16343121  | 0.950786998 | pseudogene     | 2  | 96212279  | 96213315  |               |
| ENSG00000168993 | 7.947856304 | 7.534563804 | protein_coding | 4  | 778745    | 819986    | CPLX1         |
| ENSG00000168994 | 9.153007996 | 9.071609459 | protein_coding | 6  | 3722854   | 3752260   | PXDC1         |
| ENSG00000169016 | 7.654275977 | 7.113233895 | protein_coding | 2  | 11584501  | 11606297  | E2F6          |
| ENSG00000169018 | 9.035208904 | 8.976843446 | protein_coding | 15 | 68570141  | 68588203  | FEM1B         |
| ENSG00000169019 | 6.897280837 | 7.040122572 | protein_coding | 4  | 47452885  | 47465736  | COMMD8        |
| ENSG00000169020 | 7.136425764 | 7.944622739 | protein_coding | 4  | 666225    | 668127    | ATP5I         |
| ENSG00000169021 | 8.638772743 | 8.772475459 | protein_coding | 19 | 29698167  | 29704136  | UQCRCF1       |
| ENSG00000169026 | 5.207774174 | 4.202780776 | protein_coding | 4  | 675618    | 683230    | MFSD7         |
| ENSG00000169031 | 0.869158192 | 1.518964905 | protein_coding | 2  | 228029281 | 228179508 | COL4A3        |
| ENSG00000169032 | 9.381161578 | 9.602132979 | protein_coding | 15 | 66679155  | 66784754  | MAP2K1        |
| ENSG00000169035 | 3.652182994 | 0           | protein_coding | 19 | 51479729  | 51487320  | KLK7          |
| ENSG00000169045 | 11.84231745 | 11.98610646 | protein_coding | 5  | 179041179 | 179061785 | HNRNPH1       |
| ENSG00000169047 | 9.330197577 | 7.321103092 | protein_coding | 2  | 227599757 | 227664475 | IRS1          |
| ENSG00000169057 | 9.895443335 | 9.783098001 | protein_coding | X  | 153287024 | 153402578 | MECP2         |
| ENSG00000169062 | 7.737655476 | 8.096586553 | protein_coding | 13 | 115047059 | 115071283 | UPF3A         |
| ENSG00000169067 | 3.004694206 | 3.232099092 | protein_coding | 5  | 56775846  | 56778636  | ACTBL2        |
| ENSG00000169071 | 0.869158192 | 0.697730409 | protein_coding | 9  | 94325373  | 94712444  | ROR2          |
| ENSG00000169084 | 6.482942724 | 6.695185789 | protein_coding | X  | 2137557   | 2420846   | DHRSX         |
| ENSG00000169085 | 4.097495944 | 4.990346085 | protein_coding | 8  | 67372238  | 67430759  | C8orf46       |
| ENSG00000169087 | 6.664362065 | 6.970281236 | protein_coding | 3  | 122458846 | 122512671 | HSPBAP1       |
| ENSG00000169093 | 9.163444055 | 9.025004422 | protein_coding | X  | 1522032   | 1572655   | ASMTL         |
| ENSG00000169100 | 12.1479012  | 12.08927076 | protein_coding | X  | 1505045   | 1511626   | SLC25A6       |
| ENSG00000169105 | 7.60612345  | 7.577474828 | protein_coding | 15 | 40763160  | 40765353  | CHST14        |
| ENSG00000169116 | 3.554067925 | 2.912743273 | protein_coding | 4  | 75858305  | 75975325  | PARM1         |
| ENSG00000169118 | 8.099033379 | 7.612284109 | protein_coding | 15 | 64457716  | 64665968  | CSNK1G1       |

|                 |             |             |                |    |           |           |          |
|-----------------|-------------|-------------|----------------|----|-----------|-----------|----------|
| ENSG00000169126 | 4.409500985 | 5.751299057 | protein_coding | 10 | 28064115  | 28287977  | ARMC4    |
| ENSG00000169129 | 7.537174746 | 4.622587519 | protein_coding | 10 | 116054583 | 116164515 | AFAP1L2  |
| ENSG00000169131 | 7.44778847  | 7.711939664 | protein_coding | 5  | 178138593 | 178157703 | ZNF354A  |
| ENSG00000169136 | 7.618313091 | 8.363653959 | protein_coding | 19 | 50431974  | 50437192  | ATF5     |
| ENSG00000169139 | 8.447071828 | 8.621180739 | protein_coding | 8  | 48920960  | 48976511  | UBE2V2   |
| ENSG00000169155 | 8.605481314 | 8.270836518 | protein_coding | 9  | 129567285 | 129600489 | ZBTB43   |
| ENSG00000169169 | 5.785082014 | 5.583678991 | protein_coding | 19 | 50194373  | 50216988  | CPT1C    |
| ENSG00000169174 | 1.799000381 | 0           | protein_coding | 1  | 55505221  | 55530525  | PCSK9    |
| ENSG00000169180 | 11.49331992 | 11.22761589 | protein_coding | 16 | 28109300  | 28223241  | XPO6     |
| ENSG00000169181 | 1.407729925 | 0.390640832 | protein_coding | 16 | 27798850  | 28074830  | GSG1L    |
| ENSG00000169184 | 8.458982065 | 8.658298522 | protein_coding | 22 | 28144265  | 28197486  | MN1      |
| ENSG00000169188 | 9.466233411 | 9.679673133 | protein_coding | X  | 55026790  | 55035490  | APEX2    |
| ENSG00000169189 | 8.497437504 | 8.514810202 | protein_coding | 16 | 27236312  | 27280115  | NSMCE1   |
| ENSG00000169193 | 6.846372398 | 7.295628905 | protein_coding | 7  | 23636998  | 23684327  | CCDC126  |
| ENSG00000169194 | 0           | 0.950786998 | protein_coding | 5  | 131991955 | 131996802 | IL13     |
| ENSG00000169203 | 0.869158192 | 0.697730409 | protein_coding | 16 | 29495010  | 29517320  |          |
| ENSG00000169213 | 4.292665995 | 3.781359661 | protein_coding | 1  | 52373628  | 52456436  | RAB3B    |
| ENSG00000169217 | 9.796999249 | 9.913956561 | protein_coding | 16 | 30362087  | 30366682  | CD2BP2   |
| ENSG00000169218 | 0.499066092 | 0           | protein_coding | 1  | 38076951  | 38100595  | RSPO1    |
| ENSG00000169220 | 6.830742851 | 6.24096575  | protein_coding | 5  | 176784838 | 176799602 | RGS14    |
| ENSG00000169221 | 10.03383333 | 10.05516663 | protein_coding | 16 | 30368423  | 30381585  | TBC1D10B |
| ENSG00000169223 | 10.05472661 | 10.16005582 | protein_coding | 5  | 176758563 | 176778853 | LMAN2    |
| ENSG00000169228 | 5.485736881 | 6.009862691 | protein_coding | 5  | 176728199 | 176730745 | RAB24    |
| ENSG00000169230 | 8.090308512 | 8.449576416 | protein_coding | 5  | 176730775 | 176733960 | PRELID1  |
| ENSG00000169231 | 8.972494341 | 10.57556225 | protein_coding | 1  | 155165379 | 155178842 | THBS3    |
| ENSG00000169239 | 6.393570237 | 6.210997888 | protein_coding | X  | 15706953  | 15805747  | CA5B     |
| ENSG00000169241 | 8.658089807 | 8.620040914 | protein_coding | 1  | 155107820 | 155111322 | SLC50A1  |
| ENSG00000169242 | 10.46647804 | 11.81909835 | protein_coding | 1  | 155099936 | 155107333 | EFNA1    |
| ENSG00000169245 | 4.491309013 | 7.20731193  | protein_coding | 4  | 76942273  | 76944650  | CXCL10   |
| ENSG00000169246 | 4.517578978 | 3.96493948  | protein_coding | 16 | 21413548  | 21459888  | NPIPL3   |
| ENSG00000169247 | 4.821592551 | 3.411459265 | protein_coding | 5  | 148303202 | 148442726 | SH3TC2   |
| ENSG00000169248 | 4.19837882  | 6.210997888 | protein_coding | 4  | 76954835  | 76962568  | CXCL11   |
| ENSG00000169249 | 5.858855738 | 6.123616685 | protein_coding | X  | 15808595  | 15841383  | ZRSR2    |
| ENSG00000169251 | 9.699971044 | 9.591123153 | protein_coding | 3  | 160822484 | 160971320 | NMD3     |
| ENSG00000169252 | 7.169937448 | 5.09905904  | protein_coding | 5  | 148206156 | 148208196 | ADRB2    |
| ENSG00000169253 | 0.499066092 | 1.353254395 | pseudogene     | 9  | 111389113 | 111389430 |          |
| ENSG00000169255 | 7.066972635 | 6.59664425  | protein_coding | 3  | 160801671 | 160823172 | B3GALNT1 |
| ENSG00000169258 | 8.460675529 | 8.586588042 | protein_coding | 5  | 176022803 | 176037134 | GPRIN1   |
| ENSG00000169282 | 3.502389126 | 3.183544561 | protein_coding | 3  | 155755490 | 156256545 | KCNAB1   |
| ENSG00000169288 | 6.640654398 | 7.48283249  | protein_coding | 4  | 78783674  | 78882347  | MRPL1    |
| ENSG00000169291 | 0.869158192 | 0.390640832 | protein_coding | 1  | 154442248 | 154474589 | SHE      |
| ENSG00000169299 | 8.922987828 | 9.242810972 | protein_coding | 4  | 37828255  | 37864558  | PGM2     |
| ENSG00000169302 | 0.869158192 | 0           | protein_coding | 5  | 146614526 | 146767415 | STK32A   |
| ENSG00000169306 | 2.671945279 | 1.518964905 | protein_coding | X  | 28605516  | 29974840  | IL1RAPL1 |
| ENSG00000169314 | 3.077135474 | 2.501982735 | protein_coding | 22 | 24105208  | 24108048  | C22orf15 |
| ENSG00000169330 | 5.538004898 | 5.923798455 | protein_coding | 15 | 79724858  | 79764632  | KIAA1024 |
| ENSG00000169359 | 8.666918882 | 9.059047571 | protein_coding | 3  | 155544305 | 155572218 | SLC33A1  |
| ENSG00000169371 | 6.400645076 | 7.016060809 | protein_coding | 15 | 75890424  | 75918810  | SNUPN    |
| ENSG00000169372 | 5.81716234  | 5.974624386 | protein_coding | 12 | 94071151  | 94288616  | CRADD    |
| ENSG00000169375 | 9.883498968 | 9.551016476 | protein_coding | 15 | 75661720  | 75748183  | SIN3A    |
| ENSG00000169379 | 7.853042529 | 7.84667518  | protein_coding | 3  | 93698983  | 93774512  | ARL13B   |
| ENSG00000169385 | 0           | 0.390640832 | protein_coding | 14 | 21423611  | 21424595  | RNASE2   |
| ENSG00000169397 | 0.869158192 | 0.697730409 | protein_coding | 14 | 21359558  | 21360507  | RNASE3   |
| ENSG00000169398 | 9.784207642 | 9.511607983 | protein_coding | 8  | 141667999 | 142012315 | PTK2     |
| ENSG00000169402 | 0           | 0.390640832 | protein_coding | 7  | 6793740   | 6838996   | RSPH10B2 |
| ENSG00000169403 | 5.718698586 | 4.226940739 | protein_coding | 1  | 28473677  | 28520447  | PTAFR    |
| ENSG00000169410 | 8.555643385 | 8.437980325 | protein_coding | 15 | 75759462  | 75871630  | PTPN9    |
| ENSG00000169418 | 6.585843317 | 5.988823159 | protein_coding | 1  | 153651113 | 153666468 | NPR1     |
| ENSG00000169429 | 10.8306468  | 11.36373741 | protein_coding | 4  | 74606223  | 74609433  | IL8      |
| ENSG00000169432 | 1.616589159 | 0.697730409 | protein_coding | 2  | 167051695 | 167232503 | SCN9A    |
| ENSG00000169435 | 3.335220907 | 2.144285137 | protein_coding | 4  | 74437267  | 74486348  | RASSF6   |
| ENSG00000169439 | 3.698846687 | 7.04692429  | protein_coding | 8  | 97505579  | 97624000  | SDC2     |
| ENSG00000169442 | 0.869158192 | 0           | protein_coding | 1  | 26644448  | 26647014  | CD52     |

|                 |             |             |                |    |           |           |            |
|-----------------|-------------|-------------|----------------|----|-----------|-----------|------------|
| ENSG00000169446 | 8.925442603 | 8.923327429 | protein_coding | X  | 135044229 | 135056222 | MMGT1      |
| ENSG00000169469 | 1.960915222 | 0           | protein_coding |    | 153003678 | 153005376 | SPRR1B     |
| ENSG00000169490 | 7.803191723 | 8.229580833 | protein_coding | 8  | 38846327  | 38854343  | TM2D2      |
| ENSG00000169495 | 0.869158192 | 0.950786998 | protein_coding | 8  | 38831683  | 38846181  | HTRA4      |
| ENSG00000169499 | 8.879339004 | 8.359562039 | protein_coding | 8  | 38758753  | 38831428  | PLEKHA2    |
| ENSG00000169504 | 11.47646902 | 11.73525669 | protein_coding | 1  | 25071848  | 25170815  | CLIC4      |
| ENSG00000169508 | 1.16343121  | 0.390640832 | protein_coding | 13 | 99946784  | 99959659  | GPR183     |
| ENSG00000169519 | 7.990682129 | 7.584504199 | protein_coding | 11 | 28129795  | 28355054  | METTL15    |
| ENSG00000169548 | 2.471521042 | 2.242360793 | protein_coding | 22 | 22868060  | 22874613  | ZNF280A    |
| ENSG00000169554 | 7.603059879 | 7.743685008 | protein_coding | 2  | 145121063 | 145282147 | ZEB2       |
| ENSG00000169564 | 11.05992546 | 11.0248651  | protein_coding | 2  | 70314585  | 70316332  | PCBP1      |
| ENSG00000169567 | 10.30900579 | 11.00688187 | protein_coding | 5  | 130494720 | 130507428 | HINT1      |
| ENSG00000169570 | 6.103936836 | 6.535085617 | protein_coding | 5  | 118173017 | 118324240 | DTWD2      |
| ENSG00000169583 | 7.847875458 | 7.858322159 | protein_coding | 9  | 139889087 | 139891255 | CLIC3      |
| ENSG00000169592 | 8.713115882 | 9.113519788 | protein_coding | 16 | 30006615  | 30017114  | INO80E     |
| ENSG00000169594 | 3.502389126 | 3.081239798 | protein_coding | 15 | 83924655  | 83953466  | BNC1       |
| ENSG00000169598 | 6.379315619 | 6.429738366 | protein_coding | 1  | 3773845   | 3801993   | DFFB       |
| ENSG00000169599 | 6.872051157 | 7.397596322 | protein_coding | 2  | 69622882  | 69664760  | NFU1       |
| ENSG00000169604 | 6.554468172 | 4.274079748 | protein_coding | 2  | 69240310  | 69476459  | ANTXR1     |
| ENSG00000169607 | 8.711694395 | 8.343077302 | protein_coding | 2  | 113493930 | 113522254 | CKAP2L     |
| ENSG00000169609 | 6.604346021 | 6.642271819 | protein_coding | 15 | 83657193  | 83680393  | C15orf40   |
| ENSG00000169612 | 6.335686705 | 6.803579823 | protein_coding | 15 | 83654959  | 83659809  | FAM103A1   |
| ENSG00000169618 | 0           | 0.697730409 | protein_coding | 2  | 68870721  | 68882708  | PROKR1     |
| ENSG00000169621 | 5.270908378 | 5.620622115 | protein_coding | 2  | 68694693  | 68858004  | APLF       |
| ENSG00000169627 | 3.274897671 | 3.714580548 | protein_coding | 16 | 30204255  | 30205627  | BOLA2B     |
| ENSG00000169629 | 3.146112541 | 3.906303962 | protein_coding | 2  | 113127669 | 113192065 | RGPD8      |
| ENSG00000169635 | 7.67484765  | 7.119700263 | protein_coding | 22 | 21771693  | 21805752  | HIC2       |
| ENSG00000169641 | 9.667344577 | 9.843432726 | protein_coding | 1  | 23410516  | 23504301  | LUZP1      |
| ENSG00000169660 | 6.74439909  | 7.179727017 | protein_coding | 17 | 80376252  | 80400515  | HEXDC      |
| ENSG00000169668 | 3.393122761 | 2.579085888 | pseudogene     | 22 | 21457305  | 21476574  | BCRP2      |
| ENSG00000169679 | 9.925798469 | 9.626176395 | protein_coding | 2  | 111395275 | 111435691 | BUB1       |
| ENSG00000169682 | 5.054730169 | 5.22435463  | protein_coding | 16 | 28985542  | 28995869  | SPNS1      |
| ENSG00000169683 | 7.285281023 | 7.41347308  | protein_coding | 17 | 79981280  | 79989024  | LRRC45     |
| ENSG00000169684 | 5.331395195 | 5.404622322 | protein_coding | 15 | 78857862  | 78887611  | CHRNA5     |
| ENSG00000169689 | 7.95748362  | 8.114504097 | protein_coding | 17 | 79976579  | 79980794  | STRA13     |
| ENSG00000169692 | 9.340351466 | 8.75700367  | protein_coding | 9  | 139567595 | 139581875 | AGPAT2     |
| ENSG00000169696 | 7.789781675 | 7.73528765  | protein_coding | 17 | 79935426  | 79975280  | ASPCR1     |
| ENSG00000169704 | 0           | 0.390640832 | protein_coding | 3  | 128779610 | 128781249 | GP9        |
| ENSG00000169710 | 13.75253186 | 12.42700451 | protein_coding | 17 | 80036215  | 80056106  | FASN       |
| ENSG00000169714 | 11.18760954 | 11.2182309  | protein_coding | 3  | 128888327 | 128902765 | CNBP       |
| ENSG00000169715 | 7.337827682 | 8.414504719 | protein_coding | 16 | 56659387  | 56661024  | MT1E       |
| ENSG00000169718 | 9.72977077  | 9.666483771 | protein_coding | 17 | 80015748  | 80023680  | DUS1L      |
| ENSG00000169727 | 9.9196552   | 9.92322777  | protein_coding | 17 | 80009763  | 80015346  | GPS1       |
| ENSG00000169733 | 7.776245808 | 7.747865429 | protein_coding | 17 | 80005778  | 80009719  | RFNG       |
| ENSG00000169738 | 7.978913023 | 8.435390709 | protein_coding | 17 | 79993757  | 79995573  | DCXR       |
| ENSG00000169740 | 7.04004079  | 7.500283181 | protein_coding | 10 | 44139307  | 44144304  | ZNF32      |
| ENSG00000169750 | 7.206730419 | 6.281901708 | protein_coding | 17 | 79989532  | 79992077  | RAC3       |
| ENSG00000169752 | 4.230497448 | 4.489113623 | protein_coding | 15 | 76228310  | 76352136  | NRG4       |
| ENSG00000169756 | 8.869173944 | 8.461080043 | protein_coding | 2  | 109150857 | 109303702 | LIMS1      |
| ENSG00000169758 | 3.335220907 | 3.570966319 | protein_coding | 15 | 76352178  | 76521462  | C15orf27   |
| ENSG00000169762 | 6.793601635 | 7.222412001 | protein_coding | 4  | 16162128  | 16229033  | TAPT1      |
| ENSG00000169764 | 9.099664364 | 9.418958081 | protein_coding | 2  | 64068074  | 64118696  | UGP2       |
| ENSG00000169777 | 0           | 0.390640832 | protein_coding | 5  | 9629109   | 9630463   | TAS2R1     |
| ENSG00000169783 | 0           | 0.390640832 | protein_coding | 15 | 77905369  | 78113242  | LINGO1     |
| ENSG00000169813 | 11.64884675 | 11.22405678 | protein_coding | 10 | 43881065  | 43904633  | HNRNPF     |
| ENSG00000169814 | 7.007971391 | 7.434373903 | protein_coding | 3  | 15642848  | 15687329  | BTD        |
| ENSG00000169826 | 8.085926212 | 7.830998152 | protein_coding | 10 | 43633934  | 43680756  | CSGALNACT2 |
| ENSG00000169851 | 7.546773135 | 7.82111279  | protein_coding | 4  | 30722037  | 31144728  | PCDH7      |
| ENSG00000169855 | 9.578892348 | 9.938396195 | protein_coding | 3  | 78646390  | 79816965  | ROBO1      |
| ENSG00000169856 | 2.471521042 | 3.935919592 | protein_coding | 15 | 53049186  | 53083273  | ONECUT1    |
| ENSG00000169857 | 6.835971536 | 6.881748114 | protein_coding | 15 | 34158428  | 34331377  | AVEN       |
| ENSG00000169862 | 0.499066092 | 0           | protein_coding | 5  | 10971952  | 11904155  | CTNND2     |
| ENSG00000169871 | 8.455589162 | 8.177844832 | protein_coding | 7  | 100728720 | 100735017 | TRIM56     |

|                 |             |             |                |    |           |           |          |
|-----------------|-------------|-------------|----------------|----|-----------|-----------|----------|
| ENSG00000169876 | 0.499066092 | 0           | protein_coding | 7  | 100663353 | 100702020 | MUC17    |
| ENSG00000169884 | 5.191549282 | 5.545764946 | protein_coding | 12 | 49359123  | 49365546  | WNT10B   |
| ENSG00000169885 | 2.762599152 | 1.802319292 | protein_coding | 1  | 1846266   | 1848735   | CALML6   |
| ENSG00000169891 | 7.819120959 | 7.423961341 | protein_coding | X  | 16964814  | 17171395  | REPS2    |
| ENSG00000169894 | 4.568725997 | 2.420525079 | protein_coding | 7  | 100547187 | 100611118 | MUC3A    |
| ENSG00000169895 | 9.621905585 | 9.69599206  | protein_coding | X  | 16737755  | 16783459  | SYAP1    |
| ENSG00000169896 | 4.800350936 | 5.629711952 | protein_coding | 16 | 31271311  | 31344190  | ITGAM    |
| ENSG00000169902 | 8.775675113 | 8.317991549 | protein_coding | 7  | 65670186  | 65885530  | TPST1    |
| ENSG00000169903 | 0.499066092 | 0           | protein_coding | 3  | 149191761 | 149221068 | TM4SF4   |
| ENSG00000169905 | 9.955528053 | 9.822279296 | protein_coding | 1  | 179809102 | 179846934 | TOR1AIP2 |
| ENSG00000169908 | 10.11833477 | 9.162099548 | protein_coding | 3  | 149086809 | 149095652 | TM4SF1   |
| ENSG00000169914 | 7.553136766 | 7.614575135 | protein_coding | 1  | 20209006  | 20239438  | OTUD3    |
| ENSG00000169918 | 3.146112541 | 2.721932731 | protein_coding | 15 | 31775329  | 32162992  | OTUD7A   |
| ENSG00000169919 | 9.05552222  | 9.045526555 | protein_coding | 7  | 65425671  | 65447301  | GUSB     |
| ENSG00000169925 | 10.15383543 | 9.901345166 | protein_coding | 9  | 136894789 | 136933657 | BRD3     |
| ENSG00000169926 | 9.724141885 | 9.147142808 | protein_coding | 15 | 31619058  | 31727868  | KLF13    |
| ENSG00000169933 | 0.499066092 | 0           | protein_coding | X  | 12156585  | 12742642  | FRMPD4   |
| ENSG00000169946 | 3.335220907 | 3.183544561 | protein_coding | 8  | 106330920 | 106816760 | ZFPM2    |
| ENSG00000169951 | 6.204385613 | 6.371325053 | protein_coding | 16 | 30565085  | 30569819  | ZNF764   |
| ENSG00000169955 | 5.986594255 | 5.871116342 | protein_coding | 16 | 30537244  | 30546668  | ZNF747   |
| ENSG00000169957 | 8.596266901 | 8.663840043 | protein_coding | 16 | 30535325  | 30538142  | ZNF768   |
| ENSG00000169962 | 3.830412367 | 3.453019579 | protein_coding | 1  | 1266694   | 1270686   | TAS1R3   |
| ENSG00000169964 | 6.604346021 | 6.624193585 | protein_coding | 3  | 44903361  | 44907162  | TMEM42   |
| ENSG00000169967 | 8.797280438 | 8.695567763 | protein_coding | 2  | 128056306 | 128146041 | MAP3K2   |
| ENSG00000169972 | 7.517784241 | 7.405556541 | protein_coding | 1  | 1243947   | 1247057   | PUSL1    |
| ENSG00000169976 | 9.157191483 | 9.695451059 | protein_coding | 6  | 144416018 | 144416754 | SF3B5    |
| ENSG00000169981 | 5.563445526 | 5.536128679 | protein_coding | 3  | 44690219  | 44702283  | ZNF35    |
| ENSG00000169989 | 1.960915222 | 2.242360793 | protein_coding | 4  | 153690506 | 153700916 | TIGD4    |
| ENSG00000169991 | 9.457778871 | 8.921478076 | protein_coding | 1  | 19230774  | 19283180  | IFFO2    |
| ENSG00000169992 | 10.78980292 | 11.27853085 | protein_coding | 17 | 7311502   | 7323179   | NLGN2    |
| ENSG00000169994 | 1.960915222 | 2.579085888 | protein_coding | 2  | 128293378 | 128395304 | MYO7B    |
| ENSG00000170004 | 11.8544452  | 12.37592509 | protein_coding | 17 | 7788124   | 7816078   | CHD3     |
| ENSG00000170006 | 7.337827682 | 5.004391715 | protein_coding | 4  | 153539784 | 153601317 | TMEM154  |
| ENSG00000170011 | 0           | 0.697730409 | protein_coding | 3  | 39850405  | 40301812  | MYRIP    |
| ENSG00000170017 | 10.41587333 | 10.69674488 | protein_coding | 3  | 105085753 | 105295744 | ALCAM    |
| ENSG00000170027 | 12.09136192 | 11.24565047 | protein_coding | 7  | 75956116  | 75988348  | YWHAG    |
| ENSG00000170035 | 9.102921211 | 8.426290271 | protein_coding | 2  | 181831975 | 181941312 | UBE2E3   |
| ENSG00000170037 | 10.36025702 | 10.5344096  | protein_coding | 17 | 7835473   | 7852896   | CNTROB   |
| ENSG00000170043 | 10.38007941 | 10.94200031 | protein_coding | 17 | 7833663   | 7835317   | TRAPPC1  |
| ENSG00000170044 | 0.869158192 | 0           | protein_coding | 3  | 101818088 | 102198685 | ZPLD1    |
| ENSG00000170049 | 5.81716234  | 6.535085617 | protein_coding | 17 | 7825177   | 7832753   | KCNAB3   |
| ENSG00000170075 | 3.274897671 | 4.127774132 | protein_coding | 1  | 202091972 | 202098640 | GPR37L1  |
| ENSG00000170085 | 7.734859118 | 7.522414019 | protein_coding | 5  | 175665365 | 175772994 | C5orf25  |
| ENSG00000170088 | 8.131289597 | 8.096586553 | protein_coding | 4  | 165997256 | 166129701 | TMEM192  |
| ENSG00000170089 | 5.538004898 | 5.901455548 | pseudogene     | 5  | 177236408 | 177377733 |          |
| ENSG00000170091 | 0.499066092 | 0.390640832 | protein_coding | 5  | 173472607 | 173670504 |          |
| ENSG00000170092 | 2.928422289 | 2.851901313 | pseudogene     | 7  | 75123401  | 75133628  |          |
| ENSG00000170099 | 1.16343121  | 1.667587519 | protein_coding | 14 | 94770585  | 94789731  | SERPINA6 |
| ENSG00000170100 | 5.774228067 | 5.709041716 | protein_coding | 16 | 89284118  | 89295363  | ZNF778   |
| ENSG00000170113 | 8.879339004 | 8.696649474 | protein_coding | 15 | 23043277  | 23100005  | NIPA1    |
| ENSG00000170122 | 0.499066092 | 0.390640832 | protein_coding | 9  | 116237    | 118417    | FOXO4    |
| ENSG00000170128 | 0           | 0.697730409 | protein_coding | 1  | 200842083 | 200843306 | GPR25    |
| ENSG00000170142 | 9.169669647 | 9.425497321 | protein_coding | 3  | 23847394  | 23932807  | UBE2E1   |
| ENSG00000170144 | 10.42370836 | 10.04670806 | protein_coding | 2  | 178077291 | 178086111 | HNRNPA3  |
| ENSG00000170145 | 9.244321347 | 9.478658596 | protein_coding | 11 | 111473115 | 111601577 | SIK2     |
| ENSG00000170160 | 5.83815965  | 6.775188634 | protein_coding | 17 | 16592851  | 16707767  | CCDC144A |
| ENSG00000170161 | 3.077135474 | 3.081239798 | protein_coding | 9  | 66553273  | 66555928  |          |
| ENSG00000170166 | 5.718698586 | 5.317302248 | protein_coding | 2  | 177015950 | 177020802 | HOXD4    |
| ENSG00000170175 | 7.603059879 | 8.395978102 | protein_coding | 17 | 7348380   | 7361026   | CHRNB1   |
| ENSG00000170185 | 8.156585168 | 8.194786822 | protein_coding | 4  | 144106070 | 144144983 | USP38    |
| ENSG00000170190 | 8.207901394 | 7.683850422 | protein_coding | 17 | 73084055  | 73102246  | SLC16A5  |
| ENSG00000170191 | 8.241782151 | 8.292461872 | protein_coding | 20 | 25593571  | 25604811  | NANP     |
| ENSG00000170209 | 3.335220907 | 4.021284656 | protein_coding | 11 | 113258513 | 113271140 | ANKK1    |

|                 |             |             |                |    |           |           |           |
|-----------------|-------------|-------------|----------------|----|-----------|-----------|-----------|
| ENSG00000170214 | 3.448790144 | 3.232099092 | protein_coding | 5  | 159343790 | 159399551 | ADRA1B    |
| ENSG00000170222 | 5.458875168 | 6.708116507 | protein_coding | 17 | 10600931  | 10614550  | C17orf48  |
| ENSG00000170231 | 6.379315619 | 7.924450389 | protein_coding | 5  | 159614374 | 159665742 | FABP6     |
| ENSG00000170234 | 7.356139979 | 7.457530976 | protein_coding | 5  | 159488808 | 159546430 | PWWP2A    |
| ENSG00000170236 | 0           | 0.390640832 | protein_coding | 15 | 50792759  | 50838905  | USP50     |
| ENSG00000170242 | 9.905425612 | 10.14863928 | protein_coding | 11 | 11862970  | 11980870  | USP47     |
| ENSG00000170248 | 10.18285176 | 10.276401   | protein_coding | 3  | 33839844  | 33911194  | PDCD6IP   |
| ENSG00000170260 | 7.618313091 | 7.106738413 | protein_coding | 7  | 148936742 | 148952700 | ZNF212    |
| ENSG00000170262 | 0           | 1.16600992  | protein_coding | 21 | 33664124  | 33687095  | MRAP      |
| ENSG00000170264 | 6.400645076 | 6.708116507 | protein_coding | 2  | 62051989  | 62081278  | FAM161A   |
| ENSG00000170265 | 9.394512382 | 9.02758571  | protein_coding | 7  | 148892554 | 148923339 | ZNF282    |
| ENSG00000170266 | 8.693086466 | 9.266315144 | protein_coding | 3  | 33038112  | 33138722  | GLB1      |
| ENSG00000170270 | 6.103936836 | 6.077857763 | protein_coding | 14 | 93669239  | 93673439  | C14orf142 |
| ENSG00000170271 | 6.188122351 | 6.051043053 | protein_coding | 5  | 154198051 | 154238812 | C5orf4    |
| ENSG00000170275 | 10.52024797 | 10.82272135 | protein_coding | 3  | 33155471  | 33185153  | CRTAP     |
| ENSG00000170289 | 0.499066092 | 0           | protein_coding | 8  | 87566205  | 87755903  | CNGB3     |
| ENSG00000170290 | 0.499066092 | 0           | protein_coding | 11 | 107578104 | 107590419 | SLN       |
| ENSG00000170291 | 9.058880138 | 9.932898838 | protein_coding | 17 | 7155372   | 7163250   | C17orf81  |
| ENSG00000170293 | 5.695874189 | 4.794098771 | protein_coding | 3  | 32280171  | 32411817  | CMTM8     |
| ENSG00000170296 | 10.73767751 | 11.48075629 | protein_coding | 17 | 7143333   | 7145772   | GABARAP   |
| ENSG00000170310 | 7.402691859 | 8.315177126 | protein_coding | 17 | 9153789   | 9479275   | STX8      |
| ENSG00000170312 | 9.619633528 | 9.566483319 | protein_coding | 10 | 62538089  | 62554610  | CDK1      |
| ENSG00000170315 | 12.17239307 | 13.08027416 | protein_coding | 17 | 16284113  | 16286054  | UBB       |
| ENSG00000170322 | 9.007671769 | 9.093948849 | protein_coding | 11 | 129733671 | 129765485 | NFRKB     |
| ENSG00000170325 | 7.481543613 | 7.793067905 | protein_coding | 11 | 129769601 | 129872730 | PRDM10    |
| ENSG00000170340 | 7.186405829 | 7.170413581 | protein_coding | 2  | 62423248  | 62451866  | B3GNT2    |
| ENSG00000170345 | 10.56816361 | 4.761389014 | protein_coding | 14 | 75745477  | 75748933  | FOS       |
| ENSG00000170348 | 11.46280289 | 11.66984103 | protein_coding | 14 | 75598173  | 75643334  | TMED10    |
| ENSG00000170364 | 6.372135143 | 6.539915281 | protein_coding | 3  | 4344988   | 4359251   | SETMAR    |
| ENSG00000170365 | 7.136425764 | 7.292770473 | protein_coding | 4  | 146402346 | 146479231 | SMAD1     |
| ENSG00000170374 | 0.869158192 | 0.390640832 | protein_coding | 12 | 53720362  | 53739099  | SP7       |
| ENSG00000170379 | 5.158541613 | 5.486957566 | protein_coding | 7  | 143318043 | 143427502 | FAM115C   |
| ENSG00000170381 | 4.409500985 | 2.144285137 | protein_coding | 7  | 82993222  | 83278479  | SEMA3E    |
| ENSG00000170382 | 1.407729925 | 1.518964905 | protein_coding | 1  | 204586298 | 204654861 | LRRN2     |
| ENSG00000170385 | 8.485841807 | 8.141764426 | protein_coding | 1  | 211744910 | 211752084 | SLC30A1   |
| ENSG00000170390 | 4.863159938 | 5.611474642 | protein_coding | 4  | 150999426 | 151178609 | DCLK2     |
| ENSG00000170412 | 6.766474304 | 6.387491945 | protein_coding | 17 | 72427052  | 72446719  | GPRC5C    |
| ENSG00000170417 | 6.228441838 | 5.893930351 | protein_coding | 2  | 103353367 | 103460352 | TMEM182   |
| ENSG00000170421 | 12.69315009 | 12.63434894 | protein_coding | 12 | 53290971  | 53343738  | KRT8      |
| ENSG00000170423 | 0.869158192 | 0           | protein_coding | 12 | 53231588  | 53242876  | KRT78     |
| ENSG00000170425 | 8.571403474 | 8.75700367  | protein_coding | 17 | 15848231  | 15879060  | ADORA2B   |
| ENSG00000170426 | 0.499066092 | 1.518964905 | protein_coding | 12 | 57316938  | 57328189  | SDR9C7    |
| ENSG00000170430 | 4.903563137 | 6.544728831 | protein_coding | 10 | 131265448 | 131566271 | MGMT      |
| ENSG00000170439 | 4.381167248 | 3.679994897 | protein_coding | 12 | 56075330  | 56078395  | METTL7B   |
| ENSG00000170442 | 3.911897206 | 3.081239798 | protein_coding | 12 | 52643084  | 52702947  |           |
| ENSG00000170445 | 9.662202373 | 9.740202333 | protein_coding | 5  | 140052758 | 140071609 | HARS      |
| ENSG00000170448 | 7.599898788 | 7.632773539 | protein_coding | 4  | 47849257  | 47916653  | NFXL1     |
| ENSG00000170454 | 1.799000381 | 1.16600992  | protein_coding | 12 | 52817854  | 52828309  | KRT75     |
| ENSG00000170456 | 7.50471092  | 7.560938532 | protein_coding | 12 | 31535157  | 31744031  | DENND5B   |
| ENSG00000170458 | 6.095241663 | 5.683080141 | protein_coding | 5  | 140011313 | 140013286 | CD14      |
| ENSG00000170464 | 5.60078458  | 5.506827567 | protein_coding | 5  | 138744279 | 138780180 | DNAJC18   |
| ENSG00000170469 | 5.472368541 | 5.137803333 | protein_coding | 5  | 138732252 | 138739777 | SPATA24   |
| ENSG00000170471 | 10.54040657 | 10.67440754 | protein_coding | 20 | 37101459  | 37207504  | RALGAPB   |
| ENSG00000170473 | 8.109865782 | 8.329194658 | protein_coding | 12 | 56295197  | 56326402  | WIBG      |
| ENSG00000170476 | 0.499066092 | 0.697730409 | protein_coding | 5  | 138723169 | 138725770 |           |
| ENSG00000170482 | 2.762599152 | 2.242360793 | protein_coding | 5  | 138702885 | 138720242 | SLC23A1   |
| ENSG00000170485 | 8.090308512 | 7.260948155 | protein_coding | 2  | 101436614 | 101613291 | NPAS2     |
| ENSG00000170498 | 0.499066092 | 0           | protein_coding | 1  | 204159469 | 204165614 | KISS1     |
| ENSG00000170500 | 3.448790144 | 1.518964905 | protein_coding | 2  | 100889753 | 100939195 | LONRF2    |
| ENSG00000170502 | 7.757079669 | 8.226588358 | protein_coding | 4  | 88343734  | 88380606  | NUDT9     |
| ENSG00000170509 | 1.16343121  | 0.697730409 | protein_coding | 4  | 88224941  | 88244058  | HSD17B13  |
| ENSG00000170515 | 10.85917474 | 11.01297359 | protein_coding | 12 | 56498103  | 56509935  | PA2G4     |
| ENSG00000170522 | 9.936182363 | 9.859458974 | protein_coding | 4  | 110967002 | 111120355 | ELOVL6    |

|                 |             |             |                  |    |           |           |           |
|-----------------|-------------|-------------|------------------|----|-----------|-----------|-----------|
| ENSG00000170523 | 0.869158192 | 0           | protein_coding   | 12 | 52708085  | 52715182  | KRT83     |
| ENSG00000170525 | 10.13963411 | 9.607318979 | protein_coding   | 10 | 6186881   | 6277495   | PFKFB3    |
| ENSG00000170537 | 7.097770581 | 6.057793599 | protein_coding   | 16 | 18995256  | 19075264  | TMC7      |
| ENSG00000170540 | 10.71621744 | 10.64192502 | protein_coding   | 16 | 18802991  | 18813000  | ARL6IP1   |
| ENSG00000170542 | 8.025424129 | 5.871116342 | protein_coding   | 6  | 2887500   | 2903514   | SERPINB9  |
| ENSG00000170545 | 7.870982917 | 7.577474828 | protein_coding   | 12 | 51639133  | 51664202  | SMAGP     |
| ENSG00000170558 | 0.499066092 | 1.353254395 | protein_coding   | 18 | 25530930  | 25757410  | CDH2      |
| ENSG00000170561 | 2.238690726 | 0           | protein_coding   | 5  | 2745959   | 2752969   | IRX2      |
| ENSG00000170571 | 7.627388205 | 7.760334499 | protein_coding   | 5  | 49692026  | 49739082  | EMB       |
| ENSG00000170577 | 5.124761037 | 5.383282767 | protein_coding   | 2  | 45232300  | 45236569  | SIX2      |
| ENSG00000170579 | 1.407729925 | 0.950786998 | protein_coding   | 18 | 3496030   | 4151290   | DLGAP1    |
| ENSG00000170581 | 9.100750797 | 10.22821739 | protein_coding   | 12 | 56735381  | 56753939  | STAT2     |
| ENSG00000170584 | 8.018542337 | 8.359562039 | protein_coding   | 5  | 162880494 | 162887146 | NUDCD2    |
| ENSG00000170604 | 8.387780826 | 8.374509343 | protein_coding   | 19 | 46386866  | 46389376  | IRF2BP1   |
| ENSG00000170606 | 11.16597419 | 10.94723595 | protein_coding   | 5  | 132387654 | 132442141 | HSPA4     |
| ENSG00000170608 | 2.238690726 | 2.579085888 | protein_coding   | 19 | 46367518  | 46377054  | FOXA3     |
| ENSG00000170615 | 1.16343121  | 1.16600992  | protein_coding   | 7  | 102993177 | 103086624 | SLC26A5   |
| ENSG00000170616 | 0.869158192 | 0.390640832 | protein_coding   | 8  | 145556724 | 145559943 | SCRT1     |
| ENSG00000170619 | 6.846372398 | 7.329495501 | protein_coding   | 8  | 146066427 | 146079121 | COMMDD5   |
| ENSG00000170629 | 3.911897206 | 3.411459265 | pseudogene       | 7  | 102815580 | 102920857 | DPY19L2P2 |
| ENSG00000170631 | 5.649112675 | 5.988823159 | protein_coding   | 8  | 146155744 | 146176274 | ZNF16     |
| ENSG00000170632 | 8.211928911 | 7.605389119 | protein_coding   | 7  | 102715328 | 102740205 | ARMC10    |
| ENSG00000170633 | 7.853042529 | 8.386624806 | protein_coding   | 12 | 121837844 | 121868389 | RNF34     |
| ENSG00000170634 | 4.642199401 | 5.271576845 | protein_coding   | 2  | 54342540  | 54532437  | ACYP2     |
| ENSG00000170638 | 10.35115602 | 10.44132471 | protein_coding   | 22 | 50624344  | 50638027  | TRABD     |
| ENSG00000170647 | 7.292905885 | 7.56568256  | protein_coding   | 11 | 100862811 | 100864663 | TMEM133   |
| ENSG00000170653 | 8.49908645  | 8.478794222 | protein_coding   | 12 | 53901640  | 54020199  | ATF7      |
| ENSG00000170667 | 1.960915222 | 1.925536307 | protein_coding   | 7  | 102122892 | 102184211 | RASA4B    |
| ENSG00000170677 | 7.832262274 | 7.69255166  | protein_coding   | 18 | 67956168  | 67997436  | SOCS6     |
| ENSG00000170681 | 4.842525946 | 5.150490275 | protein_coding   | 9  | 103340361 | 103350188 | MURC      |
| ENSG00000170683 | 0.499066092 | 0           | protein_coding   | 11 | 7960081   | 7961141   | OR10A3    |
| ENSG00000170684 | 6.283060568 | 5.840125386 | protein_coding   | 19 | 45574759  | 45579845  | ZNF296    |
| ENSG00000170688 | 0           | 0.390640832 | pseudogene       | 11 | 7870247   | 7871182   | OR5E1P    |
| ENSG00000170689 | 4.77879189  | 3.935919592 | protein_coding   | 17 | 46698518  | 46703839  | HOXB9     |
| ENSG00000170727 | 8.221948786 | 7.793067905 | protein_coding   | 8  | 145486055 | 145515082 | BOP1      |
| ENSG00000170734 | 7.615275323 | 8.149685112 | protein_coding   | 6  | 43543887  | 43586701  | POLH      |
| ENSG00000170745 | 7.695130106 | 6.839280559 | protein_coding   | 2  | 18059114  | 18542882  | KCNS3     |
| ENSG00000170759 | 10.92137194 | 11.95072919 | protein_coding   | 10 | 32297938  | 32345359  | KIF5B     |
| ENSG00000170775 | 3.554067925 | 1.802319292 | protein_coding   | 7  | 124386051 | 124405681 | GPR37     |
| ENSG00000170776 | 9.590540077 | 9.625608565 | protein_coding   | 15 | 85777817  | 86292586  | AKAP13    |
| ENSG00000170779 | 9.559268022 | 8.806942451 | protein_coding   | 14 | 105475910 | 105487485 | CDCA4     |
| ENSG00000170786 | 3.146112541 | 0           | protein_coding   | 8  | 57212569  | 57233335  | SDR16C5   |
| ENSG00000170788 | 0.499066092 | 0           | protein_coding   | 10 | 82095861  | 82116511  | DYDC1     |
| ENSG00000170791 | 7.717966186 | 7.902117654 | protein_coding   | 8  | 57124245  | 57131357  | CHCHD7    |
| ENSG00000170801 | 1.16343121  | 0           | protein_coding   | 4  | 8271492   | 8308838   | HTRA3     |
| ENSG00000170802 | 8.322227223 | 8.120964787 | protein_coding   | 2  | 48541776  | 48606434  | FOXN2     |
| ENSG00000170807 | 0.499066092 | 0           | protein_coding   | 7  | 123295861 | 123304344 | LMOD2     |
| ENSG00000170832 | 9.690621167 | 9.720661305 | protein_coding   | 17 | 58254691  | 58469586  | USP32     |
| ENSG00000170835 | 4.903563137 | 4.508954154 | protein_coding   | 9  | 135937365 | 135947248 | CEL       |
| ENSG00000170836 | 7.281453427 | 7.716212954 | protein_coding   | 17 | 58677554  | 58742036  | PPM1D     |
| ENSG00000170846 | 7.759833327 | 7.630511253 | processed_transc | 4  | 6675178   | 6677774   |           |
| ENSG00000170848 | 2.35979773  | 2.971122874 | protein_coding   | 19 | 43406231  | 43422162  | PSG6      |
| ENSG00000170852 | 8.990190269 | 8.868709593 | protein_coding   | 7  | 32907784  | 32933743  | KBTD2     |
| ENSG00000170854 | 8.782461599 | 8.657187659 | protein_coding   | 3  | 97660661  | 97691301  | MINA      |
| ENSG00000170855 | 7.808521034 | 7.73528765  | protein_coding   | 12 | 120881764 | 120884215 | TRIAP1    |
| ENSG00000170860 | 8.337054268 | 8.700968226 | protein_coding   | 3  | 14219858  | 14242619  | LSM3      |
| ENSG00000170866 | 0.499066092 | 0.390640832 | protein_coding   | 19 | 54799854  | 54809952  | LILRA3    |
| ENSG00000170871 | 7.990682129 | 8.295320915 | protein_coding   | 4  | 6783102   | 6885897   | KIAA0232  |
| ENSG00000170873 | 3.274897671 | 3.411459265 | protein_coding   | 8  | 125563031 | 125740730 | MTSS1     |
| ENSG00000170876 | 10.58766812 | 10.80050531 | protein_coding   | 3  | 14166440  | 14185179  | TMEM43    |
| ENSG00000170881 | 7.990682129 | 7.922602475 | protein_coding   | 8  | 125486979 | 125500155 | RNF139    |
| ENSG00000170889 | 11.94675509 | 12.24987398 | protein_coding   | 19 | 54704610  | 54752862  | RPS9      |
| ENSG00000170890 | 0           | 0.697730409 | protein_coding   | 12 | 120759914 | 120765592 | PLA2G1B   |

|                 |             |             |                  |    |           |           |           |
|-----------------|-------------|-------------|------------------|----|-----------|-----------|-----------|
| ENSG00000170892 | 9.6309582   | 9.922765621 | protein_coding   | 19 | 54693789  | 54697585  | TSEN34    |
| ENSG00000170899 | 5.036678094 | 5.923798455 | protein_coding   | 6  | 52842751  | 52860176  | GSTA4     |
| ENSG00000170903 | 7.627388205 | 7.911465009 | protein_coding   | 11 | 105866350 | 105893130 | KIAA1826  |
| ENSG00000170906 | 8.353554553 | 8.762179391 | protein_coding   | 19 | 54606036  | 54614898  | NDUFA3    |
| ENSG00000170909 | 2.471521042 | 2.912743273 | protein_coding   | 19 | 54597933  | 54606000  | OSCAR     |
| ENSG00000170915 | 5.869093502 | 6.044260771 | protein_coding   | 6  | 52226219  | 52272575  | PAQR8     |
| ENSG00000170917 | 5.718698586 | 6.16171561  | protein_coding   | 4  | 123813730 | 123844123 | NUDT6     |
| ENSG00000170919 | 5.40360309  | 4.976162367 | processed_transc | 13 | 45915480  | 45965872  |           |
| ENSG00000170921 | 9.622662143 | 9.539005037 | protein_coding   | 17 | 61086898  | 61505067  | TANC2     |
| ENSG00000170927 | 0.869158192 | 0           | protein_coding   | 6  | 51480098  | 51952423  | PKHD1     |
| ENSG00000170946 | 6.749949642 | 6.963107483 | protein_coding   | 11 | 31391387  | 31453396  | DNAJC24   |
| ENSG00000170949 | 8.894453552 | 8.984835176 | protein_coding   | 19 | 53569867  | 53606687  | ZNF160    |
| ENSG00000170954 | 7.119373418 | 6.89311646  | protein_coding   | 19 | 53611133  | 53636171  | ZNF415    |
| ENSG00000170955 | 8.779750834 | 9.486810444 | protein_coding   | 11 | 6340176   | 6341877   | PRKCDBP   |
| ENSG00000170961 | 5.498982484 | 5.792353798 | protein_coding   | 8  | 122624356 | 122653680 | HAS2      |
| ENSG00000170962 | 2.928422289 | 3.32456471  | protein_coding   | 11 | 103777914 | 104035107 | PDGFD     |
| ENSG00000170965 | 6.335686705 | 7.053694091 | protein_coding   | X  | 133699868 | 133898352 | PLAC1     |
| ENSG00000170989 | 1.616589159 | 1.16600992  | protein_coding   | 1  | 101702444 | 101707074 | S1PR1     |
| ENSG00000171004 | 9.219530792 | 8.925174415 | protein_coding   | X  | 131760038 | 132095423 | HS6ST2    |
| ENSG00000171016 | 6.041940478 | 6.716673044 | protein_coding   | 15 | 55831088  | 55881145  | PYGO1     |
| ENSG00000171017 | 4.800350936 | 4.508954154 | protein_coding   | 19 | 7953390   | 7966906   | LRRCE     |
| ENSG00000171044 | 5.054730169 | 5.564846512 | protein_coding   | 8  | 10753555  | 11058875  | XKR6      |
| ENSG00000171045 | 6.994006093 | 7.278392738 | protein_coding   | 8  | 143293441 | 143484601 | TSNARE1   |
| ENSG00000171049 | 0.499066092 | 0.697730409 | protein_coding   | 19 | 52264183  | 52273760  | FPR2      |
| ENSG00000171051 | 2.471521042 | 2.501982735 | protein_coding   | 19 | 52249027  | 52255150  | FPR1      |
| ENSG00000171053 | 0.499066092 | 1.353254395 | protein_coding   | 11 | 125616188 | 125619743 | PATE1     |
| ENSG00000171054 | 0.499066092 | 1.518964905 | protein_coding   | X  | 130677950 | 130679030 | OR13H1    |
| ENSG00000171055 | 8.643253539 | 8.801925129 | protein_coding   | 2  | 36778570  | 36873230  | FEZ2      |
| ENSG00000171056 | 1.960915222 | 1.802319292 | protein_coding   | 8  | 10581278  | 10697357  | SOX7      |
| ENSG00000171060 | 0.499066092 | 0           | protein_coding   | 8  | 10530147  | 10558103  | C8orf74   |
| ENSG00000171067 | 10.24853313 | 10.67193469 | protein_coding   | 11 | 68028803  | 68039469  | C11orf24  |
| ENSG00000171084 | 5.124761037 | 4.42790041  | pseudogene       | 3  | 125635463 | 125648867 |           |
| ENSG00000171094 | 2.35979773  | 2.788380093 | protein_coding   | 2  | 29415640  | 30144432  | ALK       |
| ENSG00000171097 | 6.469548347 | 6.525377513 | protein_coding   | 9  | 131595221 | 131644773 | CCBL1     |
| ENSG00000171100 | 7.474855471 | 7.668495823 | protein_coding   | X  | 149737069 | 149841795 | MTM1      |
| ENSG00000171103 | 7.093410923 | 7.332282157 | protein_coding   | 2  | 29072687  | 29093167  | TRMT61B   |
| ENSG00000171105 | 9.220530637 | 9.57591961  | protein_coding   | 19 | 7112266   | 7294011   | INSR      |
| ENSG00000171109 | 9.110492049 | 8.984835176 | protein_coding   | 3  | 179065480 | 179112719 | MFN1      |
| ENSG00000171115 | 4.437288965 | 4.65855978  | protein_coding   | 7  | 150147718 | 150176480 | GIMAP8    |
| ENSG00000171119 | 5.072559152 | 5.125003832 | protein_coding   | 19 | 5823818   | 5828334   | NRTN      |
| ENSG00000171121 | 4.131913373 | 3.570966319 | protein_coding   | 3  | 178957530 | 178984790 | KCNMB3    |
| ENSG00000171124 | 5.175139844 | 1.518964905 | protein_coding   | 19 | 5842900   | 5851485   | FUT3      |
| ENSG00000171126 | 4.437288965 | 4.744751758 | protein_coding   | 2  | 42669157  | 42721237  | KCNG3     |
| ENSG00000171129 | 1.407729925 | 0.390640832 | protein_coding   | X  | 148674172 | 148676974 | HSFX2     |
| ENSG00000171130 | 8.360827871 | 8.418443943 | protein_coding   | 7  | 149570057 | 149577787 | ATP6V0E2  |
| ENSG00000171132 | 6.902274257 | 6.450406542 | protein_coding   | 2  | 45878484  | 46415129  | PRKCE     |
| ENSG00000171133 | 0           | 0.390640832 | protein_coding   | 9  | 114089763 | 114090800 | OR2K2     |
| ENSG00000171135 | 8.364450825 | 8.395978102 | protein_coding   | 3  | 9932238   | 9936033   | JAGN1     |
| ENSG00000171136 | 0.499066092 | 0.390640832 | protein_coding   | 19 | 14138960  | 14141854  | RLN3      |
| ENSG00000171148 | 9.734678093 | 9.824260193 | protein_coding   | 3  | 9821544   | 9834695   | TADA3     |
| ENSG00000171150 | 8.103376106 | 7.733180651 | protein_coding   | 2  | 46926091  | 46990268  | SOC5      |
| ENSG00000171155 | 8.131289597 | 8.563056668 | protein_coding   | X  | 119759648 | 119764005 | C1GALT1C1 |
| ENSG00000171159 | 9.13084342  | 9.05820621  | protein_coding   | 9  | 130922539 | 130926207 | C9orf16   |
| ENSG00000171160 | 6.727618145 | 6.827478203 | protein_coding   | 10 | 99374310  | 99393852  | MORN4     |
| ENSG00000171161 | 8.42468852  | 8.784734524 | protein_coding   | 1  | 249132409 | 249143716 | ZNF672    |
| ENSG00000171163 | 8.653654925 | 9.214393111 | protein_coding   | 1  | 249144205 | 249153343 | ZNF692    |
| ENSG00000171169 | 6.598204782 | 6.896886088 | protein_coding   | 9  | 130823512 | 130830485 | NAIF1     |
| ENSG00000171174 | 5.774228067 | 5.674321415 | protein_coding   | 2  | 28004231  | 28113965  | RBKS      |
| ENSG00000171189 | 1.407729925 | 1.925536307 | protein_coding   | 21 | 30909254  | 31312351  | GRIK1     |
| ENSG00000171195 | 0           | 0.950786998 | protein_coding   | 4  | 71296209  | 71348714  | MUC7      |
| ENSG00000171202 | 6.956090577 | 7.515074729 | protein_coding   | 11 | 85359011  | 85367591  | TMEM126A  |
| ENSG00000171204 | 8.450484798 | 9.025004422 | protein_coding   | 11 | 85339629  | 85347580  | TMEM126B  |
| ENSG00000171206 | 10.86781572 | 10.95855266 | protein_coding   | 10 | 104404252 | 104418164 | TRIM8     |



|                 |             |             |                |    |           |           |           |
|-----------------|-------------|-------------|----------------|----|-----------|-----------|-----------|
| ENSG00000171208 | 9.72977077  | 10.26696498 | protein_coding | 16 | 47111614  | 47177908  | NETO2     |
| ENSG00000171209 | 0           | 0.697730409 | protein_coding | 4  | 71108305  | 71117145  | CSN3      |
| ENSG00000171217 | 2.847891871 | 3.183544561 | protein_coding | 6  | 155585147 | 155597682 | CLDN20    |
| ENSG00000171219 | 7.46813618  | 4.021284656 | protein_coding | 11 | 64590859  | 64612041  | CDC42BPG  |
| ENSG00000171222 | 9.097489042 | 9.883881858 | protein_coding | 20 | 34541539  | 34547394  | SCAND1    |
| ENSG00000171223 | 12.54038067 | 11.93397166 | protein_coding | 19 | 12902310  | 12904124  | JUNB      |
| ENSG00000171224 | 6.252103507 | 5.953060722 | protein_coding | 10 | 71390007  | 71393352  | C10orf35  |
| ENSG00000171227 | 4.131913373 | 3.027231696 | protein_coding | 2  | 120187477 | 120196096 | TMEM37    |
| ENSG00000171236 | 7.501423995 | 6.25865215  | protein_coding | 19 | 4537227   | 4540048   | LRG1      |
| ENSG00000171241 | 8.964161368 | 9.28369534  | protein_coding | 16 | 46614466  | 46655538  | SHCBP1    |
| ENSG00000171246 | 0.499066092 | 0           | protein_coding | 17 | 78440633  | 78450404  | NPTX1     |
| ENSG00000171262 | 8.98077946  | 8.866788836 | protein_coding | 15 | 38746328  | 38779911  | FAM98B    |
| ENSG00000171282 | 9.256071182 | 8.635917101 | protein_coding | 17 | 79373540  | 79433357  | BAHCC1    |
| ENSG00000171291 | 7.102117104 | 7.664078611 | protein_coding | 19 | 11959576  | 11980306  | ZNF439    |
| ENSG00000171295 | 8.576098123 | 8.427593853 | protein_coding | 19 | 11925099  | 11946016  | ZNF440    |
| ENSG00000171298 | 10.26945679 | 10.73778314 | protein_coding | 17 | 78075355  | 78093678  | GAA       |
| ENSG00000171302 | 9.92763636  | 9.804829433 | protein_coding | 17 | 76987799  | 77005899  | CANT1     |
| ENSG00000171303 | 3.077135474 | 2.971122874 | protein_coding | 2  | 26915558  | 26956288  | KCNK3     |
| ENSG00000171307 | 9.225519491 | 9.647589989 | protein_coding | 10 | 99205927  | 99217127  | ZDHC16    |
| ENSG00000171310 | 9.346776019 | 8.280968702 | protein_coding | 12 | 104849073 | 105155792 | CHST11    |
| ENSG00000171311 | 7.68357507  | 8.119352325 | protein_coding | 10 | 99190928  | 99205774  | EXOSC1    |
| ENSG00000171314 | 11.47688747 | 11.9266146  | protein_coding | 10 | 99185917  | 99193198  | PGAM1     |
| ENSG00000171316 | 8.960575307 | 8.565427152 | protein_coding | 8  | 61591337  | 61779465  | CHD7      |
| ENSG00000171320 | 7.501423995 | 7.628245414 | protein_coding | 8  | 27629466  | 27670157  | ESCO2     |
| ENSG00000171345 | 12.29622838 | 8.868709593 | protein_coding | 17 | 39679869  | 39684560  | KRT19     |
| ENSG00000171346 | 7.030950614 | 5.709041716 | protein_coding | 17 | 39669995  | 39678781  | KRT15     |
| ENSG00000171357 | 1.407729925 | 0.697730409 | protein_coding | 1  | 46669006  | 46686933  | C1orf190  |
| ENSG00000171365 | 8.011627561 | 8.541545191 | protein_coding | X  | 49687225  | 49863892  | CLCN5     |
| ENSG00000171368 | 5.550781289 | 4.94736961  | protein_coding | 5  | 660883    | 693510    | TPPP      |
| ENSG00000171385 | 0.499066092 | 0           | protein_coding | 1  | 112313284 | 112531777 | KCND3     |
| ENSG00000171388 | 6.830742851 | 7.681666888 | protein_coding | X  | 128779240 | 128788933 | APLN      |
| ENSG00000171401 | 0           | 0.390640832 | protein_coding | 17 | 39657233  | 39661849  | KRT13     |
| ENSG00000171403 | 0.499066092 | 0.697730409 | protein_coding | 17 | 39722096  | 39728310  | KRT9      |
| ENSG00000171405 | 0.499066092 | 0           | protein_coding | X  | 52841228  | 52847325  | XAGE5     |
| ENSG00000171408 | 1.616589159 | 3.279072565 | protein_coding | 6  | 136172834 | 136516712 | PDE7B     |
| ENSG00000171421 | 8.241782151 | 8.468698482 | protein_coding | 5  | 1798500   | 1801480   | MRPL36    |
| ENSG00000171425 | 7.627388205 | 7.971683681 | protein_coding | 19 | 56154986  | 56156988  | ZNF581    |
| ENSG00000171428 | 5.036678094 | 5.466810074 | protein_coding | 8  | 18027986  | 18081198  | NAT1      |
| ENSG00000171431 | 0           | 0.390640832 | protein_coding | 17 | 39030852  | 39041479  | KRT20     |
| ENSG00000171433 | 0           | 0.390640832 | protein_coding | X  | 48620154  | 48632064  | GLOD5     |
| ENSG00000171443 | 6.496213887 | 6.539915281 | protein_coding | 19 | 56111730  | 56114504  | ZNF524    |
| ENSG00000171444 | 8.337054268 | 5.840125386 | protein_coding | 5  | 112357796 | 112824527 | MCC       |
| ENSG00000171448 | 6.35766608  | 6.980975423 | protein_coding | 9  | 125677845 | 125693779 | ZBTB26    |
| ENSG00000171450 | 5.018397273 | 4.585695337 | protein_coding | 2  | 219824377 | 219826876 | CDK5R2    |
| ENSG00000171451 | 7.461385447 | 8.270836518 | protein_coding | 18 | 65173819  | 65184217  | DSEL      |
| ENSG00000171453 | 8.790563466 | 8.954409067 | protein_coding | 6  | 43477440  | 43497323  | POLR1C    |
| ENSG00000171456 | 10.82966424 | 10.96664607 | protein_coding | 20 | 30946147  | 31027122  | ASXL1     |
| ENSG00000171462 | 4.75690578  | 4.342020395 | protein_coding | 6  | 43418090  | 43424370  | DLK2      |
| ENSG00000171466 | 9.936790859 | 9.997084738 | protein_coding | 19 | 9759363   | 9785776   | ZNF562    |
| ENSG00000171467 | 9.000704568 | 9.515291124 | protein_coding | 6  | 43299513  | 43337181  | ZNF318    |
| ENSG00000171469 | 9.053279257 | 9.304420832 | protein_coding | 19 | 9715356   | 9732075   | ZNF561    |
| ENSG00000171471 | 4.689181911 | 4.448594745 | protein_coding | 12 | 116997186 | 117014425 | MAP1LC3B2 |
| ENSG00000171475 | 9.809013881 | 9.029304007 | protein_coding | 17 | 38375574  | 38440388  | WIPF2     |
| ENSG00000171483 | 0           | 0.697730409 | protein_coding | X  | 47967365  | 47980073  | SSX6      |
| ENSG00000171488 | 6.188122351 | 1.802319292 | protein_coding | 1  | 90098631  | 90398809  | LRRRC8C   |
| ENSG00000171490 | 11.114462   | 10.92225346 | protein_coding | 16 | 11931196  | 11945442  | RSL1D1    |
| ENSG00000171492 | 9.340351466 | 8.96970233  | protein_coding | 1  | 90286573  | 90402170  | LRRRC8D   |
| ENSG00000171496 | 0.499066092 | 0.390640832 | protein_coding | 9  | 125329778 | 125330838 | OR1L8     |
| ENSG00000171497 | 8.025424129 | 8.643790155 | protein_coding | 4  | 159630286 | 159644548 | PPID      |
| ENSG00000171502 | 0           | 0.697730409 | protein_coding | 1  | 86194916  | 86222626  | COL24A1   |
| ENSG00000171503 | 7.266040677 | 7.675096386 | protein_coding | 4  | 159593277 | 159630775 | ETFDH     |
| ENSG00000171522 | 7.35977471  | 6.984522608 | protein_coding | 5  | 40679600  | 40693837  | PTGER4    |
| ENSG00000171530 | 8.944931872 | 9.242070261 | protein_coding | 5  | 76986991  | 77164604  | TBCA      |

|                 |             |             |                |    |           |           |          |
|-----------------|-------------|-------------|----------------|----|-----------|-----------|----------|
| ENSG00000171532 | 0           | 0.390640832 | protein_coding | 17 | 37760021  | 37764196  | NEUROD2  |
| ENSG00000171533 | 4.322773689 | 5.200150955 | protein_coding | 11 | 75297963  | 75380165  | MAP6     |
| ENSG00000171551 | 0           | 0.697730409 | protein_coding | 2  | 233344537 | 233352538 | ECEL1    |
| ENSG00000171552 | 10.50555736 | 10.34077957 | protein_coding | 20 | 30252255  | 30311792  | BCL2L1   |
| ENSG00000171561 | 0           | 0.390640832 | protein_coding | 11 | 74799758  | 74800799  | OR2AT4   |
| ENSG00000171566 | 9.713528165 | 10.49422748 | protein_coding | 4  | 155456158 | 155471587 | PLRG1    |
| ENSG00000171570 | 7.853042529 | 7.614575135 | protein_coding | 19 | 41305048  | 41314336  | EGLN2    |
| ENSG00000171574 | 7.853042529 | 7.795089291 | protein_coding | 19 | 58920063  | 58956870  | ZNF584   |
| ENSG00000171587 | 0.499066092 | 0           | protein_coding | 21 | 41382926  | 42219065  | DSCAM    |
| ENSG00000171595 | 0           | 0.390640832 | protein_coding | 17 | 72270386  | 72311022  | DNAI2    |
| ENSG00000171596 | 0           | 0.390640832 | protein_coding | 2  | 232387871 | 232395206 | NMUR1    |
| ENSG00000171603 | 11.1589505  | 11.01470937 | protein_coding | 1  | 9789084   | 9884584   | CLSTN1   |
| ENSG00000171604 | 8.839544001 | 8.998057128 | protein_coding | 5  | 139026884 | 139063467 | CXXC5    |
| ENSG00000171606 | 8.930339658 | 9.512836742 | protein_coding | 19 | 58694396  | 58724927  | ZNF274   |
| ENSG00000171608 | 8.148202495 | 8.208501977 | protein_coding | 1  | 9711790   | 9789172   | PIK3CD   |
| ENSG00000171611 | 0.499066092 | 0           | protein_coding | 6  | 42883727  | 42893898  | PTCRA    |
| ENSG00000171612 | 5.498982484 | 5.953060722 | protein_coding | 1  | 9599541   | 9642831   | SLC25A33 |
| ENSG00000171617 | 9.809678436 | 9.442361917 | protein_coding | 5  | 73923234  | 73937249  | ENC1     |
| ENSG00000171621 | 8.294008989 | 7.9428005   | protein_coding | 1  | 9352939   | 9429591   | SPSB1    |
| ENSG00000171631 | 7.565780433 | 6.729413443 | protein_coding | 11 | 72975550  | 73009662  | P2RY6    |
| ENSG00000171634 | 9.614318105 | 9.686767343 | protein_coding | 17 | 65821637  | 66033571  | BPTF     |
| ENSG00000171649 | 8.036821332 | 7.644032061 | protein_coding | 19 | 58095508  | 58105253  | ZIK1     |
| ENSG00000171657 | 0.869158192 | 0.697730409 | protein_coding | X  | 41583408  | 41589388  | GPR82    |
| ENSG00000171658 | 1.960915222 | 0.390640832 | pseudogene     | 3  | 185677732 | 185698658 |          |
| ENSG00000171659 | 1.16343121  | 1.16600992  | protein_coding | X  | 41548226  | 41556526  | GPR34    |
| ENSG00000171680 | 8.000028772 | 7.832967122 | protein_coding | 1  | 6526152   | 6580121   | PLEKHG5  |
| ENSG00000171681 | 10.45037457 | 10.02448085 | protein_coding | 12 | 14518610  | 14651697  | ATF7IP   |
| ENSG00000171695 | 0.499066092 | 0           | protein_coding | 20 | 62714733  | 62715712  | C2orf201 |
| ENSG00000171700 | 7.68357507  | 7.263870273 | protein_coding | 20 | 62704534  | 62711323  | RGS19    |
| ENSG00000171703 | 8.985492538 | 9.065760854 | protein_coding | 20 | 62681189  | 62703700  | TCEA2    |
| ENSG00000171720 | 9.47296155  | 9.138412238 | protein_coding | 5  | 141000443 | 141016437 | HDAC3    |
| ENSG00000171722 | 0           | 0.390640832 | protein_coding | 1  | 162343515 | 162346660 | C1orf111 |
| ENSG00000171723 | 9.206469362 | 9.479287299 | protein_coding | 14 | 66974125  | 67648520  | GPHN     |
| ENSG00000171729 | 7.416718478 | 7.856387513 | protein_coding | 1  | 15479028  | 15546974  | TMEM51   |
| ENSG00000171735 | 7.621344476 | 7.632773539 | protein_coding | 1  | 6845384   | 7827916   | CAMTA1   |
| ENSG00000171747 | 0           | 0.390640832 | protein_coding | 19 | 39292312  | 39303740  | LGALS4   |
| ENSG00000171757 | 6.979904289 | 6.316088276 | protein_coding | 3  | 169511216 | 169530774 | LRRC34   |
| ENSG00000171763 | 7.308035767 | 7.365308824 | protein_coding | 15 | 45694529  | 45713617  | SPATA5L1 |
| ENSG00000171766 | 4.77879189  | 4.961837817 | protein_coding | 15 | 45653322  | 45694416  | GATM     |
| ENSG00000171773 | 0           | 0.697730409 | protein_coding | 19 | 17566236  | 17571725  | NXNL1    |
| ENSG00000171777 | 1.16343121  | 1.16600992  | protein_coding | 19 | 38899698  | 38916945  | RASGRP4  |
| ENSG00000171786 | 4.19837882  | 4.127774132 | protein_coding | 1  | 160336857 | 160342638 | NHLH1    |
| ENSG00000171790 | 5.512107582 | 5.486957566 | protein_coding | 1  | 41481269  | 41488909  | SLFN1    |
| ENSG00000171791 | 6.35766608  | 6.563824016 | protein_coding | 18 | 60790579  | 60987361  | BCL2     |
| ENSG00000171792 | 8.225937332 | 8.141764426 | protein_coding | 12 | 2985424   | 2998626   | C12orf32 |
| ENSG00000171793 | 9.40334477  | 9.629578691 | protein_coding | 1  | 41445007  | 41478235  | CTPS     |
| ENSG00000171798 | 6.861834435 | 6.874119142 | protein_coding | 10 | 134973951 | 135039916 | KNDC1    |
| ENSG00000171804 | 3.077135474 | 3.133298822 | protein_coding | 19 | 38375463  | 38397317  | WDR87    |
| ENSG00000171806 | 5.431503808 | 5.393992    | protein_coding | 1  | 169761670 | 169764107 | METTL18  |
| ENSG00000171811 | 3.502389126 | 2.912743273 | protein_coding | 10 | 134621896 | 134756327 | TTC40    |
| ENSG00000171812 | 3.274897671 | 2.144285137 | protein_coding | 1  | 36560837  | 36590821  | COL8A2   |
| ENSG00000171813 | 8.199812472 | 7.73107057  | protein_coding | 10 | 134210672 | 134231367 | PWWP2B   |
| ENSG00000171817 | 3.004694206 | 3.493416095 | protein_coding | 19 | 38085731  | 38105000  | ZNF540   |
| ENSG00000171819 | 0.869158192 | 0.950786998 | protein_coding | 1  | 11249398  | 11256038  | ANGPTL7  |
| ENSG00000171823 | 7.285281023 | 6.926693689 | protein_coding | 12 | 1675159   | 1703331   | FBXL14   |
| ENSG00000171824 | 9.526494794 | 9.705158168 | protein_coding | 1  | 11126675  | 11159938  | EXOSC10  |
| ENSG00000171827 | 5.223818625 | 5.072639111 | protein_coding | 19 | 37959982  | 37976260  | ZNF570   |
| ENSG00000171840 | 4.618121645 | 3.608232228 | protein_coding | 12 | 673462    | 772945    | NINJ2    |
| ENSG00000171843 | 5.827699195 | 6.544728831 | protein_coding | 9  | 20341663  | 20622542  | MLLT3    |
| ENSG00000171847 | 2.35979773  | 1.353254395 | protein_coding | 12 | 8373856   | 8380214   | FAM90A1  |
| ENSG00000171848 | 10.35115602 | 10.05052055 | protein_coding | 2  | 10262455  | 10271545  | RRM2     |
| ENSG00000171853 | 8.937654214 | 8.450859136 | protein_coding | 2  | 3383446   | 3488865   | TRAPPC12 |
| ENSG00000171855 | 0           | 0.390640832 | protein_coding | 9  | 21077104  | 21077943  | IFNB1    |

|                 |             |             |                  |    |           |           |           |
|-----------------|-------------|-------------|------------------|----|-----------|-----------|-----------|
| ENSG00000171858 | 11.35857322 | 12.10289984 | protein_coding   | 20 | 60962105  | 60963576  | RPS21     |
| ENSG00000171860 | 2.471521042 | 1.925536307 | protein_coding   | 12 | 8210898   | 8219067   | C3AR1     |
| ENSG00000171861 | 8.13977083  | 8.749726325 | protein_coding   | 17 | 685513    | 695749    | NNMTL1    |
| ENSG00000171862 | 9.507778518 | 9.434602747 | protein_coding   | 10 | 89622870  | 89731687  | PTEN      |
| ENSG00000171863 | 9.891054276 | 9.967366806 | protein_coding   | 2  | 3622795   | 3628509   | RPS7      |
| ENSG00000171864 | 0           | 0.390640832 | protein_coding   | 20 | 4702556   | 4709106   | PRND      |
| ENSG00000171865 | 8.303476525 | 7.705505903 | protein_coding   | 2  | 3592383   | 3606206   | RNASEH1   |
| ENSG00000171867 | 11.7580624  | 11.91388133 | protein_coding   | 20 | 4666882   | 4682236   | PRNP      |
| ENSG00000171872 | 5.389447744 | 6.293387477 | protein_coding   | 1  | 44584522  | 44600812  | KLF17     |
| ENSG00000171873 | 1.16343121  | 0.950786998 | protein_coding   | 20 | 4201329   | 4229721   | ADRA1D    |
| ENSG00000171877 | 7.416718478 | 7.096940025 | protein_coding   | 15 | 44162962  | 44487450  | FRMD5     |
| ENSG00000171889 | 3.077135474 | 2.501982735 | processed_transc | 9  | 21455641  | 21559668  | MIR31HG   |
| ENSG00000171914 | 7.695130106 | 8.301022059 | protein_coding   | 15 | 62682725  | 63136830  | TLN2      |
| ENSG00000171928 | 7.334137164 | 7.871792517 | protein_coding   | 17 | 18684519  | 18710027  | FAM18B1   |
| ENSG00000171931 | 2.671945279 | 1.802319292 | protein_coding   | 17 | 18647326  | 18682662  | FBXW10    |
| ENSG00000171940 | 10.06366867 | 9.665379195 | protein_coding   | 20 | 52183604  | 52226446  | ZNF217    |
| ENSG00000171943 | 5.158541613 | 5.03207928  | pseudogene       | 1  | 121107124 | 121129949 | SRGAP2P1  |
| ENSG00000171951 | 2.762599152 | 3.714580548 | protein_coding   | 2  | 224461658 | 224467221 | SCG2      |
| ENSG00000171953 | 7.759833327 | 8.367734306 | protein_coding   | 17 | 17918373  | 17942523  | ATPAF2    |
| ENSG00000171954 | 0.499066092 | 0           | protein_coding   | 19 | 15636144  | 15663127  | CYP4F22   |
| ENSG00000171956 | 1.16343121  | 1.353254395 | protein_coding   | 15 | 60296421  | 60353929  | FOXB1     |
| ENSG00000171960 | 7.444369108 | 7.913327235 | protein_coding   | 1  | 43124096  | 43142429  | PIIH      |
| ENSG00000171962 | 5.967663407 | 6.408769788 | protein_coding   | 17 | 17876127  | 17920203  | LRR48     |
| ENSG00000171970 | 6.693459083 | 6.874119142 | protein_coding   | 19 | 2900896   | 2918474   | ZNF57     |
| ENSG00000171984 | 5.223818625 | 5.593003837 | protein_coding   | 20 | 5731039   | 5845020   | C2orf196  |
| ENSG00000171988 | 9.47296155  | 9.230166865 | protein_coding   | 10 | 64926981  | 65225722  | JMJD1C    |
| ENSG00000171989 | 0.869158192 | 1.518964905 | protein_coding   | 15 | 59499042  | 59500705  | LDHAL6B   |
| ENSG00000171992 | 10.23276269 | 9.589377052 | protein_coding   | 5  | 149980642 | 150038782 | SYNPO     |
| ENSG00000172000 | 6.809636522 | 6.343971006 | protein_coding   | 19 | 2867333   | 2878501   | ZNF556    |
| ENSG00000172005 | 1.616589159 | 0.390640832 | protein_coding   | 2  | 95691422  | 95719737  | MAL       |
| ENSG00000172006 | 6.788216822 | 7.100213554 | protein_coding   | 19 | 2819872   | 2836733   | ZNF554    |
| ENSG00000172007 | 6.393570237 | 6.673373662 | protein_coding   | 4  | 140374386 | 140397763 | RAB33B    |
| ENSG00000172009 | 11.15346388 | 11.33918459 | protein_coding   | 19 | 2785506   | 2813588   | THOP1     |
| ENSG00000172014 | 0.499066092 | 0           | protein_coding   | 9  | 69381812  | 69425560  | ANKRD20A4 |
| ENSG00000172020 | 0           | 0.390640832 | protein_coding   | 3  | 115342171 | 115440337 | GAP43     |
| ENSG00000172031 | 1.407729925 | 1.16600992  | protein_coding   | 1  | 92495539  | 92529093  | EPHX4     |
| ENSG00000172037 | 10.7766072  | 11.55241425 | protein_coding   | 3  | 49158547  | 49170551  | LAMB2     |
| ENSG00000172046 | 9.364975797 | 9.331831739 | protein_coding   | 3  | 49145479  | 49158371  | USP19     |
| ENSG00000172053 | 10.80554674 | 10.81601773 | protein_coding   | 3  | 49133365  | 49142553  | QARS      |
| ENSG00000172057 | 8.5900911   | 8.587754596 | protein_coding   | 17 | 38077294  | 38083854  | ORMDL3    |
| ENSG00000172058 | 0.499066092 | 0.950786998 | protein_coding   | 5  | 70196492  | 70214357  | SERF1A    |
| ENSG00000172059 | 8.49908645  | 7.907733332 | protein_coding   | 2  | 10182976  | 10194963  | KLF11     |
| ENSG00000172061 | 3.448790144 | 3.368666104 | protein_coding   | 3  | 194075976 | 194090472 | LRR45     |
| ENSG00000172062 | 4.863159938 | 4.585695337 | protein_coding   | 5  | 70220768  | 70249769  | SMN1      |
| ENSG00000172070 | 8.682966505 | 8.64266806  | protein_coding   | 20 | 627259    | 656444    | SRXN1     |
| ENSG00000172071 | 8.227927477 | 8.714915547 | protein_coding   | 2  | 88856259  | 88927094  | EIF2AK3   |
| ENSG00000172073 | 0.499066092 | 1.518964905 | protein_coding   | 2  | 88824169  | 88829102  | C2orf51   |
| ENSG00000172081 | 10.42110141 | 10.43031225 | protein_coding   | 19 | 2071037   | 2096269   | MOB3A     |
| ENSG00000172086 | 7.474855471 | 8.061749803 | protein_coding   | 2  | 88326724  | 88355248  | KRCC1     |
| ENSG00000172113 | 6.856698814 | 6.703819132 | protein_coding   | 3  | 48334754  | 48343175  | NME6      |
| ENSG00000172115 | 10.88147134 | 10.74381326 | protein_coding   | 7  | 25159710  | 25164980  | CYCS      |
| ENSG00000172116 | 0.499066092 | 0           | protein_coding   | 2  | 87042462  | 87089047  | CD8B      |
| ENSG00000172123 | 6.579622637 | 6.703819132 | protein_coding   | 17 | 33738079  | 33760218  | SLFN12    |
| ENSG00000172137 | 9.540174158 | 10.29830006 | protein_coding   | 16 | 71392616  | 71424341  | CALB2     |
| ENSG00000172139 | 1.16343121  | 2.579085888 | protein_coding   | 3  | 111859734 | 112013105 | SLC9A10   |
| ENSG00000172159 | 3.911897206 | 4.021284656 | protein_coding   | 9  | 85857905  | 86153461  | FRMD3     |
| ENSG00000172164 | 2.671945279 | 3.133298822 | protein_coding   | 8  | 121547985 | 121825513 | SNTB1     |
| ENSG00000172167 | 6.766474304 | 7.022976646 | protein_coding   | 8  | 121457640 | 121554373 | MTBP      |
| ENSG00000172171 | 6.364918751 | 6.682138126 | protein_coding   | 17 | 29226001  | 29233286  | TEFM      |
| ENSG00000172172 | 7.850461307 | 8.279525596 | protein_coding   | 8  | 121393000 | 121457642 | MRPL13    |
| ENSG00000172175 | 8.611591722 | 8.945336714 | protein_coding   | 18 | 56338618  | 56421130  | MALT1     |
| ENSG00000172183 | 6.086493765 | 6.699508919 | protein_coding   | 15 | 89179384  | 89199714  | ISG20     |
| ENSG00000172197 | 7.210761201 | 5.893930351 | protein_coding   | 6  | 20100935  | 20212670  | MBOAT1    |

|                 |             |             |                  |    |           |           |           |
|-----------------|-------------|-------------|------------------|----|-----------|-----------|-----------|
| ENSG00000172201 | 4.6658819   | 4.810179682 | protein_coding   | 6  | 19837617  | 19840915  | ID4       |
| ENSG00000172209 | 0.499066092 | 1.802319292 | protein_coding   | 7  | 107110463 | 107116098 | GPR22     |
| ENSG00000172215 | 2.10647801  | 1.925536307 | protein_coding   | 3  | 45982425  | 45989845  | CXCR6     |
| ENSG00000172216 | 9.981711773 | 9.791728663 | protein_coding   | 20 | 48807376  | 48809212  | CEBPB     |
| ENSG00000172232 | 0.869158192 | 1.802319292 | protein_coding   | 19 | 825097    | 832017    | AZU1      |
| ENSG00000172236 | 1.960915222 | 3.493416095 | protein_coding   | 16 | 1290697   | 1293619   | TPSAB1    |
| ENSG00000172239 | 9.154055005 | 9.153459292 | protein_coding   | 5  | 43526369  | 43557860  | PAIP1     |
| ENSG00000172243 | 2.57521082  | 0.390640832 | protein_coding   | 12 | 10269376  | 10282857  | CLEC7A    |
| ENSG00000172244 | 7.269909329 | 7.434373903 | protein_coding   | 5  | 43486803  | 43515247  | C5orf34   |
| ENSG00000172247 | 2.10647801  | 2.039052734 | protein_coding   | 11 | 47611216  | 47616211  | C1QTNF4   |
| ENSG00000172250 | 2.928422289 | 1.667587519 | processed_transc | 22 | 42896585  | 42908566  | SERHL     |
| ENSG00000172260 | 0.869158192 | 4.202780776 | protein_coding   | 1  | 71868625  | 72748417  | NEGR1     |
| ENSG00000172262 | 8.910650905 | 9.059888441 | protein_coding   | 5  | 43065278  | 43192123  | ZNF131    |
| ENSG00000172264 | 3.603959378 | 4.250702764 | protein_coding   | 20 | 13976015  | 16033842  | MACROD2   |
| ENSG00000172269 | 9.704980607 | 10.16982567 | protein_coding   | 11 | 118967213 | 118979041 | DPAGT1    |
| ENSG00000172270 | 13.28996602 | 13.91694041 | protein_coding   | 19 | 571310    | 583492    | BSG       |
| ENSG00000172273 | 7.642387679 | 8.231074746 | protein_coding   | 11 | 118992297 | 119006752 | HINFP     |
| ENSG00000172289 | 0.499066092 | 0           | protein_coding   | 11 | 59480296  | 59481337  | OR10V1    |
| ENSG00000172292 | 8.213938461 | 7.733180651 | protein_coding   | 2  | 169312372 | 169631644 | CERS6     |
| ENSG00000172296 | 7.206730419 | 5.647721597 | protein_coding   | 20 | 12989627  | 13147411  | SPTLC3    |
| ENSG00000172297 | 0.499066092 | 0           | pseudogene       | Y  | 27600708  | 27606719  | GOLGA2P3Y |
| ENSG00000172301 | 8.422952257 | 8.525807191 | protein_coding   | 17 | 30178883  | 30186310  | C17orf79  |
| ENSG00000172315 | 7.959880444 | 8.706348549 | protein_coding   | 20 | 45313004  | 45318418  | TP53RK    |
| ENSG00000172331 | 7.292905885 | 7.307006333 | protein_coding   | 7  | 134331560 | 134364565 | BPGM      |
| ENSG00000172336 | 9.118023364 | 8.9688072   | protein_coding   | 7  | 100303676 | 100305118 | POP7      |
| ENSG00000172339 | 5.207774174 | 5.259915406 | protein_coding   | 1  | 95448297  | 95538501  | ALG14     |
| ENSG00000172340 | 8.400188597 | 8.440565301 | protein_coding   | 3  | 67410884  | 67705038  | SUCLG2    |
| ENSG00000172345 | 4.464551814 | 4.761389014 | protein_coding   | 15 | 81601394  | 81616524  | STARD5    |
| ENSG00000172346 | 2.57521082  | 1.802319292 | protein_coding   | 22 | 41956767  | 42069998  | CSDC2     |
| ENSG00000172348 | 0.499066092 | 0.697730409 | protein_coding   | 6  | 46188475  | 46459709  | RCAN2     |
| ENSG00000172349 | 2.35979773  | 3.027231696 | protein_coding   | 15 | 81451916  | 81605104  | IL16      |
| ENSG00000172350 | 3.554067925 | 3.411459265 | protein_coding   | 11 | 119019722 | 119033360 | ABCG4     |
| ENSG00000172354 | 11.35675549 | 10.72113561 | protein_coding   | 7  | 100271154 | 100276797 | GNB2      |
| ENSG00000172361 | 3.077135474 | 3.081239798 | protein_coding   | 18 | 47753563  | 47792865  | CCDC11    |
| ENSG00000172366 | 7.974178365 | 8.063427911 | protein_coding   | 16 | 691813    | 698474    | FAM195A   |
| ENSG00000172367 | 1.16343121  | 0.697730409 | protein_coding   | 11 | 119056166 | 119060932 | PDZD3     |
| ENSG00000172375 | 7.698004462 | 7.975253757 | protein_coding   | 11 | 118972908 | 118989252 | C2CD2L    |
| ENSG00000172379 | 5.858855738 | 5.611474642 | protein_coding   | 15 | 80696692  | 80890278  | ARNT2     |
| ENSG00000172380 | 10.57833886 | 10.76922802 | protein_coding   | 1  | 68167149  | 68299150  | GNG12     |
| ENSG00000172382 | 4.409500985 | 4.604259349 | protein_coding   | 16 | 2762419   | 2770552   | PRSS27    |
| ENSG00000172399 | 1.407729925 | 0.697730409 | protein_coding   | 4  | 120056939 | 120108944 | MYO22     |
| ENSG00000172403 | 1.407729925 | 2.242360793 | protein_coding   | 4  | 119809996 | 119982402 | SYNPO2    |
| ENSG00000172404 | 1.407729925 | 1.353254395 | protein_coding   | 22 | 41255553  | 41258130  | DNAJB7    |
| ENSG00000172409 | 7.935731106 | 8.094946597 | protein_coding   | 11 | 57416465  | 57429340  | CLP1      |
| ENSG00000172421 | 2.238690726 | 2.144285137 | protein_coding   | 17 | 60447579  | 60493837  | EFCAB3    |
| ENSG00000172426 | 2.847891871 | 2.788380093 | protein_coding   | 6  | 43612783  | 43640337  | RSPH9     |
| ENSG00000172428 | 7.345180517 | 7.931818465 | protein_coding   | 2  | 241065980 | 241076224 | MYEOV2    |
| ENSG00000172432 | 9.568721018 | 10.29187254 | protein_coding   | 6  | 43573053  | 43596936  | GTPBP2    |
| ENSG00000172456 | 5.995967334 | 6.445267191 | protein_coding   | 1  | 59762467  | 60233347  | FGGY      |
| ENSG00000172458 | 5.018397273 | 4.693656882 | protein_coding   | 13 | 21276266  | 21297237  | IL17D     |
| ENSG00000172460 | 3.989024711 | 5.200150955 | pseudogene       | 16 | 2889569   | 2892745   | PRSS30P   |
| ENSG00000172465 | 6.343050432 | 7.269696813 | protein_coding   | X  | 102883632 | 102885881 | TCEAL1    |
| ENSG00000172466 | 9.112647868 | 9.080752488 | protein_coding   | 18 | 32912176  | 32924420  | ZNF24     |
| ENSG00000172469 | 7.457998197 | 7.701200733 | protein_coding   | 6  | 96025419  | 96057333  | MANEA     |
| ENSG00000172476 | 2.671945279 | 2.912743273 | protein_coding   | X  | 102754678 | 102774417 | RAB40A    |
| ENSG00000172478 | 0.499066092 | 0           | protein_coding   | 2  | 241825465 | 241836306 | C2orf54   |
| ENSG00000172482 | 0.499066092 | 0.390640832 | protein_coding   | 2  | 241807896 | 241819919 | AGXT      |
| ENSG00000172493 | 8.968928959 | 9.069940847 | protein_coding   | 4  | 87856154  | 88062206  | AFF1      |
| ENSG00000172500 | 9.707835423 | 10.09795979 | protein_coding   | 11 | 65651212  | 65656010  | FIBP      |
| ENSG00000172508 | 5.054730169 | 5.200150955 | protein_coding   | 11 | 67182439  | 67193078  | CARNS1    |
| ENSG00000172530 | 7.63640659  | 8.075120324 | protein_coding   | 16 | 87982850  | 88152028  | BANP      |
| ENSG00000172531 | 12.17226388 | 11.95186212 | protein_coding   | 11 | 67165654  | 67188654  | PPP1CA    |
| ENSG00000172534 | 11.74994854 | 11.26327988 | protein_coding   | X  | 153213004 | 153237258 | HCFC1     |

|                 |             |             |                |    |           |           |          |
|-----------------|-------------|-------------|----------------|----|-----------|-----------|----------|
| ENSG00000172543 | 3.502389126 | 3.133298822 | protein_coding | 11 | 65647280  | 65651212  | CTSW     |
| ENSG00000172548 | 0           | 0.390640832 | protein_coding | 5  | 156887027 | 156901725 | NIPAL4   |
| ENSG00000172551 | 0.499066092 | 0           | protein_coding | 12 | 55224303  | 55252177  | MUCL1    |
| ENSG00000172575 | 4.165528823 | 5.150490275 | protein_coding | 15 | 38780304  | 38857776  | RASGRP1  |
| ENSG00000172578 | 0           | 0.390640832 | protein_coding | 3  | 183205319 | 183273477 | KLHL6    |
| ENSG00000172586 | 8.085926212 | 8.155990499 | protein_coding | 10 | 75541805  | 75543410  | CHCHD1   |
| ENSG00000172590 | 8.891945431 | 9.416334062 | protein_coding | 14 | 23299088  | 23304246  | MRPL52   |
| ENSG00000172594 | 2.57521082  | 4.101879561 | protein_coding | 6  | 123110315 | 123130865 | SMPDL3A  |
| ENSG00000172602 | 3.211941663 | 4.021284656 | protein_coding | 12 | 49250928  | 49259681  | RND1     |
| ENSG00000172613 | 9.064459359 | 8.958923939 | protein_coding | 11 | 67159176  | 67165881  | RAD9A    |
| ENSG00000172638 | 5.141750194 | 6.097646709 | protein_coding | 11 | 65633912  | 65641063  | EFEMP2   |
| ENSG00000172640 | 0.499066092 | 0.390640832 | protein_coding | 12 | 48596081  | 48597170  | OR10AD1  |
| ENSG00000172650 | 1.16343121  | 0.697730409 | protein_coding | 10 | 75434033  | 75457639  | AGAP5    |
| ENSG00000172653 | 1.960915222 | 1.353254395 | protein_coding | 17 | 34181955  | 34195895  | C17orf66 |
| ENSG00000172660 | 10.97774947 | 10.62696653 | protein_coding | 17 | 34136488  | 34174237  | TAF15    |
| ENSG00000172661 | 6.171673665 | 6.729413443 | protein_coding | 10 | 46222648  | 46288412  | FAM21C   |
| ENSG00000172663 | 8.770222845 | 9.140003549 | protein_coding | 11 | 67231824  | 67236743  | TMEM134  |
| ENSG00000172667 | 7.63640659  | 7.249200135 | protein_coding | 3  | 178735011 | 178790067 | ZMAT3    |
| ENSG00000172671 | 6.393570237 | 6.264499759 | protein_coding | 10 | 46111043  | 46168228  | ZFAND4   |
| ENSG00000172687 | 7.352496068 | 7.135740508 | protein_coding | 19 | 21541732  | 21562104  | ZNF738   |
| ENSG00000172716 | 2.10647801  | 0.950786998 | protein_coding | 17 | 33677324  | 33700642  | SLFN11   |
| ENSG00000172717 | 2.762599152 | 2.652276565 | protein_coding | 14 | 67656110  | 67695267  | FAM71D   |
| ENSG00000172725 | 11.34167114 | 11.33171911 | protein_coding | 11 | 67205519  | 67211292  | CORO1B   |
| ENSG00000172728 | 6.17992145  | 6.287656023 | protein_coding | 8  | 33228342  | 33330940  | FUT10    |
| ENSG00000172731 | 7.427149666 | 6.117167886 | protein_coding | 10 | 72058729  | 72142382  | LRRC20   |
| ENSG00000172732 | 8.443650765 | 9.157393097 | protein_coding | 11 | 65624597  | 65635124  | MUS81    |
| ENSG00000172733 | 0           | 2.039052734 | protein_coding | 8  | 30853321  | 30891231  | PURG     |
| ENSG00000172738 | 3.211941663 | 4.777836593 | protein_coding | 6  | 37179956  | 37225931  | TMEM217  |
| ENSG00000172748 | 4.097495944 | 5.486957566 | protein_coding | 8  | 182137    | 197342    | ZNF596   |
| ENSG00000172757 | 13.22923163 | 13.36664368 | protein_coding | 11 | 65590493  | 65629497  | CFL1     |
| ENSG00000172765 | 7.997697782 | 7.856387513 | protein_coding | 3  | 129366635 | 129612419 | TMCC1    |
| ENSG00000172766 | 7.311793575 | 6.779278886 | protein_coding | 13 | 41885341  | 41951166  | NAA16    |
| ENSG00000172771 | 2.471521042 | 2.788380093 | protein_coding | 3  | 129120164 | 129147494 | C3orf25  |
| ENSG00000172775 | 9.303080552 | 9.707843036 | protein_coding | 16 | 57186378  | 57220028  | FAM192A  |
| ENSG00000172780 | 5.018397273 | 4.319727133 | protein_coding | 3  | 128806412 | 128841644 | RAB43    |
| ENSG00000172785 | 7.003331296 | 6.889336956 | protein_coding | 9  | 121041    | 188979    | CBWD1    |
| ENSG00000172789 | 2.671945279 | 3.081239798 | protein_coding | 12 | 54379629  | 54429145  | HOXC5    |
| ENSG00000172794 | 2.10647801  | 0.950786998 | protein_coding | 17 | 72666717  | 72743474  | RAB37    |
| ENSG00000172795 | 8.364450825 | 8.272288337 | protein_coding | 5  | 112312399 | 112356667 | DCP2     |
| ENSG00000172803 | 3.393122761 | 3.813624741 | protein_coding | 11 | 65601112  | 65624367  | SNX32    |
| ENSG00000172809 | 11.13422738 | 11.85126812 | protein_coding | 17 | 72199721  | 72206676  | RPL38    |
| ENSG00000172818 | 4.800350936 | 0.390640832 | protein_coding | 11 | 65554493  | 65564690  | OVOL1    |
| ENSG00000172819 | 9.867630505 | 8.295320915 | protein_coding | 12 | 53604354  | 53626764  | RARG     |
| ENSG00000172824 | 3.603959378 | 4.489113623 | protein_coding | 16 | 67022492  | 67043661  | CES4A    |
| ENSG00000172828 | 2.10647801  | 3.027231696 | protein_coding | 16 | 66995140  | 67009051  | CES3     |
| ENSG00000172830 | 10.3061829  | 8.963424725 | protein_coding | 11 | 67070919  | 67080078  | SSH3     |
| ENSG00000172831 | 9.101836412 | 9.32205174  | protein_coding | 16 | 66968347  | 66997159  | CES2     |
| ENSG00000172840 | 7.384964606 | 7.593823731 | protein_coding | 16 | 66912492  | 66929657  | PDP2     |
| ENSG00000172845 | 9.749993326 | 9.406451268 | protein_coding | 2  | 174771187 | 174830430 | SP3      |
| ENSG00000172869 | 8.241782151 | 8.502492199 | protein_coding | 5  | 118373467 | 118584833 | DMXL1    |
| ENSG00000172878 | 6.75547892  | 6.877938671 | protein_coding | 2  | 172864490 | 172947158 | METAP1D  |
| ENSG00000172888 | 7.250461488 | 7.449853178 | protein_coding | 3  | 40566369  | 40616176  | ZNF621   |
| ENSG00000172889 | 1.960915222 | 1.802319292 | protein_coding | 9  | 139553308 | 139567130 | EGFL7    |
| ENSG00000172890 | 9.221529789 | 9.655399771 | protein_coding | 11 | 71164155  | 71239227  | NADSYN1  |
| ENSG00000172893 | 11.18171776 | 10.02663303 | protein_coding | 11 | 71139239  | 71163914  | DHCR7    |
| ENSG00000172900 | 0.499066092 | 0.390640832 | pseudogene     | 11 | 71093647  | 71134469  |          |
| ENSG00000172901 | 8.16075831  | 2.912743273 | protein_coding | 5  | 115298151 | 115394680 |          |
| ENSG00000172915 | 5.331395195 | 6.167968749 | protein_coding | 13 | 35516424  | 36247159  | NBEA     |
| ENSG00000172922 | 8.249639777 | 9.124814753 | protein_coding | 11 | 65482367  | 65488418  | RNASEH2C |
| ENSG00000172927 | 8.309127368 | 7.603083446 | protein_coding | 11 | 69061605  | 69182494  | MYEOV    |
| ENSG00000172932 | 9.976394534 | 9.673093524 | protein_coding | 11 | 67056018  | 67069956  | ANKRD13D |
| ENSG00000172935 | 0.869158192 | 1.353254395 | protein_coding | 11 | 68771863  | 68780877  | MRGPRF   |
| ENSG00000172936 | 8.772951555 | 8.341695034 | protein_coding | 3  | 38179969  | 38184513  | MYD88    |

|                 |             |             |                  |    |           |           |           |
|-----------------|-------------|-------------|------------------|----|-----------|-----------|-----------|
| ENSG00000172938 | 2.238690726 | 1.925536307 | protein_coding   | 11 | 68747490  | 68748455  | MRGPRD    |
| ENSG00000172939 | 9.972245312 | 9.824754993 | protein_coding   | 3  | 38206580  | 38296979  | OXSR1     |
| ENSG00000172940 | 2.471521042 | 1.667587519 | protein_coding   | 3  | 38307303  | 38319806  | SLC22A13  |
| ENSG00000172943 | 8.916832554 | 8.837666333 | protein_coding   | X  | 53963109  | 54075391  | PHF8      |
| ENSG00000172954 | 8.749591335 | 8.165397208 | protein_coding   | 2  | 30670092  | 30867091  | LCLAT1    |
| ENSG00000172955 | 1.616589159 | 2.039052734 | protein_coding   | 4  | 100123795 | 100140694 | ADH6      |
| ENSG00000172965 | 7.813830732 | 7.913327235 | processed_transc | 2  | 111965353 | 112252677 |           |
| ENSG00000172967 | 1.407729925 | 1.353254395 | protein_coding   | 22 | 17264302  | 17302589  | XKR3      |
| ENSG00000172971 | 0.499066092 | 0.697730409 | pseudogene       | 3  | 75668657  | 75673000  |           |
| ENSG00000172974 | 2.847891871 | 1.925536307 | pseudogene       | 2  | 65432137  | 65433396  |           |
| ENSG00000172977 | 8.16075831  | 8.093304774 | protein_coding   | 11 | 65479467  | 65487075  | KAT5      |
| ENSG00000172985 | 0.499066092 | 0.390640832 | protein_coding   | 2  | 109745804 | 110262207 | SH3RF3    |
| ENSG00000172986 | 8.484177644 | 8.454700467 | protein_coding   | 3  | 72937224  | 73047289  | GXYLT2    |
| ENSG00000172992 | 7.985986001 | 7.67728988  | protein_coding   | 17 | 43100710  | 43138473  | DCAKD     |
| ENSG00000173011 | 7.868433623 | 7.675096386 | protein_coding   | 4  | 7043626   | 7058368   | TADA2B    |
| ENSG00000173013 | 3.830412367 | 4.127774132 | protein_coding   | 4  | 7042579   | 7044728   | CCDC96    |
| ENSG00000173020 | 11.34602979 | 10.65895157 | protein_coding   | 11 | 67033881  | 67054027  | ADRBK1    |
| ENSG00000173039 | 10.55077877 | 10.49484943 | protein_coding   | 11 | 65421067  | 65430565  | RELA      |
| ENSG00000173040 | 1.616589159 | 0           | protein_coding   | 4  | 5544499   | 5711275   | EVC2      |
| ENSG00000173041 | 7.481543613 | 6.99862477  | protein_coding   | 7  | 63980262  | 64023484  | ZNF680    |
| ENSG00000173064 | 8.935220147 | 8.568975592 | protein_coding   | 12 | 112597992 | 112819896 | C12orf51  |
| ENSG00000173065 | 8.547698305 | 7.864110577 | protein_coding   | 17 | 27082996  | 27169841  | C17orf63  |
| ENSG00000173068 | 6.350376764 | 6.926693689 | protein_coding   | 9  | 16416404  | 16870841  | BNC2      |
| ENSG00000173077 | 1.407729925 | 3.608232228 | protein_coding   | 9  | 117904097 | 118164923 | 1-dec     |
| ENSG00000173080 | 3.274897671 | 2.579085888 | protein_coding   | 1  | 155911480 | 155912625 | RXFP4     |
| ENSG00000173083 | 6.882196036 | 6.117167886 | protein_coding   | 4  | 84213614  | 84256306  | HPSE      |
| ENSG00000173085 | 7.873527714 | 7.737391576 | protein_coding   | 4  | 84182689  | 84206067  | COQ2      |
| ENSG00000173088 | 0.499066092 | 1.353254395 | protein_coding   | 10 | 97620305  | 97793507  | C10orf131 |
| ENSG00000173110 | 2.671945279 | 2.334191469 | protein_coding   | 1  | 161494036 | 161496681 | HSPA6     |
| ENSG00000173113 | 10.29483576 | 10.51583798 | protein_coding   | 11 | 64083932  | 64085556  | TRMT112   |
| ENSG00000173114 | 0           | 0.390640832 | protein_coding   | 7  | 110731062 | 110765507 | LRRN3     |
| ENSG00000173120 | 12.18640502 | 11.93270983 | protein_coding   | 11 | 66886740  | 67025141  | KDM2A     |
| ENSG00000173124 | 0.499066092 | 0.950786998 | protein_coding   | 10 | 96953957  | 96988685  | C10orf129 |
| ENSG00000173137 | 6.129712275 | 6.605885938 | protein_coding   | 8  | 145596790 | 145618457 | ADCK5     |
| ENSG00000173141 | 8.523597116 | 8.813937516 | protein_coding   | 13 | 21750784  | 21753223  | MRP63     |
| ENSG00000173145 | 8.3053626   | 9.009418947 | protein_coding   | 10 | 96075004  | 96122716  | NOC3L     |
| ENSG00000173153 | 9.346776019 | 8.958923939 | protein_coding   | 11 | 64073044  | 64084215  | ESRRA     |
| ENSG00000173156 | 7.615275323 | 4.468996429 | protein_coding   | 11 | 66824289  | 66839484  | RHOD      |
| ENSG00000173157 | 0           | 0.697730409 | protein_coding   | 12 | 43747669  | 43945724  | ADAMTS20  |
| ENSG00000173163 | 6.138202758 | 7.126137778 | protein_coding   | 2  | 62115859  | 62374382  | COMMD1    |
| ENSG00000173166 | 10.13698882 | 9.29944532  | protein_coding   | 2  | 204259068 | 204400133 | RAPH1     |
| ENSG00000173171 | 8.602416377 | 8.632529738 | protein_coding   | 1  | 155178490 | 155183614 | MTX1      |
| ENSG00000173175 | 1.799000381 | 2.851901313 | protein_coding   | 3  | 123001143 | 123168605 | ADCY5     |
| ENSG00000173193 | 10.34291574 | 10.70321774 | protein_coding   | 3  | 122399465 | 122449687 | PARP14    |
| ENSG00000173200 | 0.499066092 | 0.390640832 | protein_coding   | 3  | 122296449 | 122357894 | PARP15    |
| ENSG00000173207 | 9.355904607 | 9.946148432 | protein_coding   | 1  | 154947129 | 154951725 | CKS1B     |
| ENSG00000173208 | 0           | 0.390640832 | protein_coding   | 12 | 39943835  | 40013553  | ABCD2     |
| ENSG00000173209 | 7.800519667 | 8.081759401 | protein_coding   | 2  | 61404553  | 61414686  | AHSA2     |
| ENSG00000173210 | 10.23820324 | 9.938396195 | protein_coding   | 5  | 148521046 | 148640105 | ABLIM3    |
| ENSG00000173212 | 0.499066092 | 0           | protein_coding   | 1  | 116654376 | 116677861 | MAB21L3   |
| ENSG00000173213 | 1.616589159 | 0.390640832 | protein_coding   | 18 | 47390     | 49557     |           |
| ENSG00000173214 | 5.707331524 | 5.931169853 | protein_coding   | 6  | 111580551 | 111592370 | KIAA1919  |
| ENSG00000173218 | 8.710271506 | 8.633659743 | protein_coding   | 1  | 116184574 | 116240845 | VANGL1    |
| ENSG00000173221 | 6.456028446 | 6.660126317 | protein_coding   | 5  | 95087023  | 95158709  | GLRX      |
| ENSG00000173226 | 8.179389493 | 8.436686098 | protein_coding   | 3  | 121488610 | 121553926 | IQCB1     |
| ENSG00000173227 | 8.360827871 | 6.746227492 | protein_coding   | 11 | 66774249  | 66818334  | SYT12     |
| ENSG00000173230 | 9.984068715 | 10.35386622 | protein_coding   | 3  | 121382046 | 121468602 | GOLGB1    |
| ENSG00000173237 | 4.800350936 | 4.42790041  | protein_coding   | 11 | 66742748  | 66744475  | C11orf86  |
| ENSG00000173239 | 1.960915222 | 0           | protein_coding   | 10 | 90562654  | 90580303  | LIPM      |
| ENSG00000173253 | 2.57521082  | 0           | protein_coding   | 9  | 1050354   | 1057552   | DMRT2     |
| ENSG00000173258 | 4.026095388 | 2.912743273 | protein_coding   | 9  | 114287439 | 114340124 | ZNF483    |
| ENSG00000173261 | 3.211941663 | 3.813624741 | protein_coding   | 5  | 145463949 | 145483932 | PLAC8L1   |
| ENSG00000173262 | 0.869158192 | 0.697730409 | protein_coding   | 12 | 7965108   | 8043744   | SLC2A14   |

|                 |             |             |                |    |           |           |           |
|-----------------|-------------|-------------|----------------|----|-----------|-----------|-----------|
| ENSG00000173264 | 8.490822808 | 9.250933796 | protein_coding | 11 | 64037534  | 64056972  | GPR137    |
| ENSG00000173267 | 6.228441838 | 4.363974406 | protein_coding | 10 | 88718375  | 88723017  | SNCG      |
| ENSG00000173269 | 4.097495944 | 3.87606762  | protein_coding | 10 | 88695297  | 88729238  | MMRN2     |
| ENSG00000173272 | 8.398422578 | 8.056703738 | protein_coding | 2  | 132222473 | 132250316 | MZT2A     |
| ENSG00000173273 | 8.840844993 | 8.874456566 | protein_coding | 8  | 9413424   | 9639856   | TNKS      |
| ENSG00000173275 | 6.320845526 | 6.877938671 | protein_coding | X  | 134478721 | 134497077 | ZNF449    |
| ENSG00000173276 | 8.74542939  | 8.876367148 | protein_coding | 21 | 43406940  | 43430496  | ZNF295    |
| ENSG00000173281 | 8.687312327 | 8.514810202 | protein_coding | 8  | 8993765   | 9009084   | PPP1R3B   |
| ENSG00000173295 | 5.431503808 | 4.94736961  | protein_coding | 8  | 8097891   | 8102384   |           |
| ENSG00000173320 | 3.554067925 | 2.579085888 | protein_coding | 4  | 184774584 | 184944679 | STOX2     |
| ENSG00000173327 | 10.21932096 | 9.711058296 | protein_coding | 11 | 65365226  | 65382853  | MAP3K11   |
| ENSG00000173334 | 9.106170722 | 8.558303982 | protein_coding | 8  | 126442563 | 126450647 | TRIB1     |
| ENSG00000173338 | 2.471521042 | 2.242360793 | protein_coding | 11 | 65360326  | 65363467  | KCNK7     |
| ENSG00000173391 | 10.60193356 | 9.865242842 | protein_coding | 12 | 10310902  | 10324737  | OLR1      |
| ENSG00000173401 | 1.960915222 | 0.950786998 | protein_coding | 12 | 75728419  | 75764340  | GLIPR1L1  |
| ENSG00000173402 | 12.00492709 | 11.89173735 | protein_coding | 3  | 49506146  | 49573048  | DAG1      |
| ENSG00000173409 | 7.266040677 | 7.326703453 | protein_coding | 1  | 231114727 | 231136341 | ARV1      |
| ENSG00000173418 | 9.422587759 | 9.607894053 | protein_coding | 20 | 19997760  | 20014299  | NAA20     |
| ENSG00000173421 | 3.004694206 | 4.075511708 | protein_coding | 3  | 49235861  | 49295537  | CCDC36    |
| ENSG00000173431 | 0.869158192 | 0.390640832 | protein_coding | 14 | 21525981  | 21526614  | RNASE8    |
| ENSG00000173432 | 8.744039402 | 8.574870331 | protein_coding | 11 | 18287721  | 18291524  | SAA1      |
| ENSG00000173436 | 8.78921631  | 9.36009759  | protein_coding | 1  | 19923477  | 19956314  | MINOS1    |
| ENSG00000173442 | 10.39344018 | 10.20369859 | protein_coding | 11 | 65343509  | 65360121  | EHBP1L1   |
| ENSG00000173451 | 5.175139844 | 5.32851069  | protein_coding | 12 | 72056789  | 72074419  | THAP2     |
| ENSG00000173456 | 9.893563944 | 9.745961151 | protein_coding | 11 | 119205237 | 119208023 | RNF26     |
| ENSG00000173457 | 10.70232786 | 10.80377176 | protein_coding | 11 | 64011956  | 64014413  | PPP1R14B  |
| ENSG00000173465 | 8.474152153 | 9.08571528  | protein_coding | 11 | 65337901  | 65341413  | SSSCA1    |
| ENSG00000173473 | 10.73697893 | 10.72086981 | protein_coding | 3  | 47626762  | 47823596  | SMARCC1   |
| ENSG00000173480 | 7.017207048 | 7.343375265 | protein_coding | 19 | 58417142  | 58427978  | ZNF417    |
| ENSG00000173482 | 6.975172889 | 7.444711851 | protein_coding | 18 | 7567817   | 8406859   | PTPRM     |
| ENSG00000173486 | 8.694526397 | 9.144766978 | protein_coding | 11 | 64008475  | 64011604  | FKBP2     |
| ENSG00000173511 | 9.051032802 | 9.004186147 | protein_coding | 11 | 64002010  | 64006259  | VEGFB     |
| ENSG00000173517 | 8.544507981 | 8.693401904 | protein_coding | 15 | 77400471  | 77712486  |           |
| ENSG00000173530 | 7.549958459 | 7.532142019 | protein_coding | 8  | 22993101  | 23021543  | TNFRSF10D |
| ENSG00000173531 | 4.593635215 | 5.496926774 | protein_coding | 3  | 49721380  | 49726934  | MST1      |
| ENSG00000173535 | 4.464551814 | 4.021284656 | protein_coding | 8  | 22941868  | 22990110  | TNFRSF10C |
| ENSG00000173540 | 3.911897206 | 4.048652948 | protein_coding | 3  | 49754277  | 49761384  | GMPPB     |
| ENSG00000173542 | 8.325948295 | 8.213044874 | protein_coding | 4  | 71768043  | 71888166  | MOB1B     |
| ENSG00000173545 | 9.711396018 | 9.509762881 | protein_coding | 5  | 16451628  | 16465901  | ZNF622    |
| ENSG00000173546 | 6.528867325 | 5.784235782 | protein_coding | 15 | 75966663  | 76005189  | CSPG4     |
| ENSG00000173548 | 8.763378405 | 8.971490926 | protein_coding | 15 | 75940247  | 75954642  | SNX33     |
| ENSG00000173557 | 3.211941663 | 1.518964905 | protein_coding | 2  | 26785450  | 26802400  | C2orf70   |
| ENSG00000173559 | 8.875535495 | 9.381107599 | protein_coding | 2  | 192542794 | 192553251 | OBFC2A    |
| ENSG00000173566 | 6.228441838 | 6.424524724 | protein_coding | 8  | 21964383  | 21966932  | NUDT18    |
| ENSG00000173567 | 2.238690726 | 2.334191469 | protein_coding | 2  | 26531041  | 26569685  | GPR113    |
| ENSG00000173575 | 10.17874213 | 10.06357588 | protein_coding | 15 | 93425937  | 93571237  | CHD2      |
| ENSG00000173578 | 0.499066092 | 0.390640832 | protein_coding | 3  | 46058516  | 46069234  | XCR1      |
| ENSG00000173581 | 5.124761037 | 5.709041716 | protein_coding | 19 | 56158954  | 56164527  | CCDC106   |
| ENSG00000173588 | 6.94645393  | 7.106738413 | protein_coding | 12 | 94700225  | 94853764  | CCDC41    |
| ENSG00000173598 | 9.542574757 | 9.339469783 | protein_coding | 12 | 93771659  | 93797024  | NUDT4     |
| ENSG00000173599 | 11.17270558 | 10.6281009  | protein_coding | 11 | 66615704  | 66725847  | PC        |
| ENSG00000173611 | 5.967663407 | 5.656642807 | protein_coding | 9  | 127714380 | 127905785 | SCAI      |
| ENSG00000173614 | 6.522395495 | 6.668971382 | protein_coding | 1  | 10003486  | 10045559  | NMNAT1    |
| ENSG00000173621 | 9.882235894 | 9.856074312 | protein_coding | 11 | 66624118  | 66627946  | LRFN4     |
| ENSG00000173627 | 0           | 0.697730409 | protein_coding | 1  | 183615541 | 183622451 | APOBEC4   |
| ENSG00000173638 | 9.455232818 | 9.497401522 | protein_coding | 21 | 46913486  | 46964325  | SLC19A1   |
| ENSG00000173641 | 0           | 0.697730409 | protein_coding | 1  | 16340523  | 16346089  | HSPB7     |
| ENSG00000173653 | 9.265790136 | 8.872543451 | protein_coding | 11 | 66610306  | 66614017  | RCE1      |
| ENSG00000173660 | 9.328343713 | 9.630144961 | protein_coding | 1  | 46769303  | 46782448  | UQCRH     |
| ENSG00000173662 | 0.499066092 | 0.697730409 | protein_coding | 1  | 6615241   | 6639817   | TAS1R1    |
| ENSG00000173674 | 10.26655536 | 10.29294578 | protein_coding | X  | 20142636  | 20159962  | EIF1AX    |
| ENSG00000173681 | 7.017207048 | 7.073814954 | protein_coding | X  | 19930978  | 19988416  | CXorf23   |
| ENSG00000173692 | 10.86621944 | 10.819994   | protein_coding | 2  | 231921578 | 232037541 | PSMD1     |

|                 |             |             |                  |    |           |           |            |
|-----------------|-------------|-------------|------------------|----|-----------|-----------|------------|
| ENSG00000173698 | 1.407729925 | 2.144285137 | protein_coding   | X  | 19007427  | 19140755  | GPR64      |
| ENSG00000173702 | 0           | 0.697730409 | protein_coding   |    | 124624289 | 124672663 | MUC13      |
| ENSG00000173705 | 2.847891871 | 2.652276565 | protein_coding   | 3  | 33191537  | 33260707  | SUSD5      |
| ENSG00000173706 | 10.88273508 | 11.00666383 | protein_coding   | 3  | 124684554 | 124774802 | HEG1       |
| ENSG00000173715 | 8.205883411 | 8.157562549 | protein_coding   | 11 | 66511922  | 66610987  | C11orf80   |
| ENSG00000173726 | 10.96199326 | 11.08991059 | protein_coding   | 1  | 235272651 | 235292251 | TOMM20     |
| ENSG00000173727 | 5.346128795 | 5.456629825 | protein_coding   | 11 | 65222728  | 65234028  |            |
| ENSG00000173728 | 1.616589159 | 0.697730409 | protein_coding   | 1  | 244515937 | 244552965 | C1orf100   |
| ENSG00000173744 | 10.00452934 | 9.53114363  | protein_coding   | 2  | 228336868 | 228421384 | AGFG1      |
| ENSG00000173757 | 9.137210979 | 9.383796417 | protein_coding   | 17 | 40351186  | 40428725  | STAT5B     |
| ENSG00000173762 | 1.407729925 | 0           | protein_coding   | 17 | 80272746  | 80275480  | CD7        |
| ENSG00000173786 | 9.920270706 | 9.654286673 | protein_coding   | 17 | 40118759  | 40127194  | CNP        |
| ENSG00000173801 | 10.61187421 | 9.176127473 | protein_coding   | 17 | 39775692  | 39943183  | JUP        |
| ENSG00000173805 | 0.499066092 | 0.390640832 | protein_coding   | 17 | 39873994  | 39890896  | HAP1       |
| ENSG00000173809 | 0           | 0.697730409 | protein_coding   | 19 | 33210659  | 33320483  | TDRD12     |
| ENSG00000173811 | 0.499066092 | 0.697730409 | antisense        | 3  | 42774067  | 42788260  | CCDC13-AS1 |
| ENSG00000173812 | 12.19406034 | 11.79253236 | protein_coding   | 17 | 39845137  | 39848920  | EIF1       |
| ENSG00000173818 | 7.784382559 | 7.646273261 | protein_coding   | 17 | 78388965  | 78411886  | ENDOV      |
| ENSG00000173821 | 11.14269141 | 11.02464977 | protein_coding   | 17 | 78234665  | 78370078  | RNF213     |
| ENSG00000173825 | 3.077135474 | 3.183544561 | protein_coding   | 11 | 65122238  | 65125084  | TIGD3      |
| ENSG00000173838 | 1.799000381 | 1.802319292 | protein_coding   | 17 | 60778676  | 60885705  | 10-Mar     |
| ENSG00000173846 | 6.646617938 | 6.911866869 | protein_coding   | 1  | 45265897  | 45271662  | PLK3       |
| ENSG00000173848 | 9.796328827 | 8.605140645 | protein_coding   | 10 | 5454514   | 5500426   | NET1       |
| ENSG00000173852 | 9.813659349 | 9.886254153 | protein_coding   | 7  | 34961081  | 35077883  | DPY19L1    |
| ENSG00000173867 | 0.869158192 | 0.950786998 | processed_transc | 15 | 89002948  | 89054752  | MRPL46     |
| ENSG00000173868 | 3.146112541 | 3.232099092 | protein_coding   | 17 | 47300724  | 47308128  | PHOSPHO1   |
| ENSG00000173875 | 8.565120083 | 8.431497548 | protein_coding   | 19 | 12721732  | 12742735  | ZNF791     |
| ENSG00000173876 | 1.407729925 | 1.353254395 | protein_coding   | 10 | 92828     | 96053     | TUBB8      |
| ENSG00000173889 | 8.072698871 | 7.928139131 | protein_coding   | 3  | 169804520 | 169899537 | PHC3       |
| ENSG00000173890 | 3.393122761 | 3.453019579 | protein_coding   | 3  | 169755717 | 169803191 | GPR160     |
| ENSG00000173894 | 8.18144485  | 7.924450389 | protein_coding   | 17 | 77751977  | 77761449  | CBX2       |
| ENSG00000173898 | 9.784883719 | 8.630267069 | protein_coding   | 11 | 66452719  | 66496697  | SPTBN2     |
| ENSG00000173905 | 9.585892264 | 9.474880612 | protein_coding   | 3  | 167726465 | 167813763 | GOLIM4     |
| ENSG00000173914 | 7.720795447 | 7.992972811 | protein_coding   | 11 | 66432469  | 66445392  | RBM4B      |
| ENSG00000173915 | 8.337054268 | 9.103767504 | protein_coding   | 10 | 105148798 | 105156223 | USMG5      |
| ENSG00000173918 | 11.69597623 | 11.6385214  | protein_coding   | 17 | 77020251  | 77045870  | C1QTNF1    |
| ENSG00000173926 | 7.813830732 | 8.327799018 | protein_coding   | 5  | 126203406 | 126366500 | 3-Mar      |
| ENSG00000173928 | 5.785082014 | 6.332882496 | protein_coding   | 19 | 11485383  | 11487627  | SWSAP1     |
| ENSG00000173930 | 0.869158192 | 0           | protein_coding   | 5  | 101569690 | 101632253 | SLCO4C1    |
| ENSG00000173933 | 6.462804234 | 6.408769788 | protein_coding   | 11 | 66406088  | 66434153  | RBM4       |
| ENSG00000173947 | 1.407729925 | 3.532712221 | protein_coding   | 1  | 111888910 | 111895635 | C1orf88    |
| ENSG00000173950 | 8.75235931  | 9.077434451 | protein_coding   | 3  | 194789008 | 194991896 | XXYLT1     |
| ENSG00000173960 | 7.776245808 | 7.289906366 | protein_coding   | 2  | 24150155  | 24227779  | UBXN2A     |
| ENSG00000173976 | 1.16343121  | 0.390640832 | protein_coding   | 19 | 3769087   | 3772233   | RAX2       |
| ENSG00000173988 | 0.499066092 | 0.390640832 | protein_coding   | 13 | 46786083  | 46844757  | LRR63      |
| ENSG00000173991 | 4.19837882  | 3.368666104 | protein_coding   | 17 | 37820440  | 37822808  | TCAP       |
| ENSG00000173992 | 9.153007996 | 9.759482214 | protein_coding   | 11 | 66360292  | 66373490  | CCS        |
| ENSG00000174004 | 2.10647801  | 1.353254395 | protein_coding   | 3  | 196366557 | 196388875 | LRR63      |
| ENSG00000174007 | 5.375152132 | 5.085909553 | protein_coding   | 3  | 196433148 | 196439164 | CEP19      |
| ENSG00000174010 | 7.33043718  | 7.429177016 | protein_coding   | X  | 24001837  | 24045303  | KLHL15     |
| ENSG00000174013 | 9.169669647 | 8.606292299 | protein_coding   | 3  | 196295482 | 196315930 | FBXO45     |
| ENSG00000174021 | 8.864064429 | 9.223427792 | protein_coding   | 1  | 84964008  | 84972248  | GNF5       |
| ENSG00000174028 | 0.869158192 | 1.353254395 | pseudogene       | X  | 23093875  | 23094884  | FAM3C2     |
| ENSG00000174032 | 6.400645076 | 5.045726316 | protein_coding   | 13 | 45967451  | 45992590  | SLC25A30   |
| ENSG00000174038 | 2.35979773  | 1.802319292 | protein_coding   | 9  | 35041092  | 35045988  | C9orf131   |
| ENSG00000174059 | 4.543379137 | 4.250702764 | protein_coding   | 1  | 208057594 | 208084747 | CD34       |
| ENSG00000174080 | 7.218789138 | 8.963424725 | protein_coding   | 11 | 66330934  | 66336312  | CTSF       |
| ENSG00000174083 | 0.499066092 | 1.353254395 | processed_transc | 17 | 8706041   | 8770994   | PIK3R6     |
| ENSG00000174093 | 5.774228067 | 5.620622115 | protein_coding   | 17 | 36337717  | 36421858  |            |
| ENSG00000174099 | 7.80585884  | 8.385283657 | protein_coding   | 12 | 65672423  | 65882024  | MSRB3      |
| ENSG00000174100 | 8.429884808 | 8.620040914 | protein_coding   | 17 | 36452990  | 36479101  | MRPL45     |
| ENSG00000174106 | 7.824391858 | 7.937319932 | protein_coding   | 12 | 65563351  | 65642107  | LEMD3      |
| ENSG00000174109 | 6.94645393  | 7.568048738 | protein_coding   | 16 | 1469745   | 1479345   | C16orf91   |



|                 |             |             |                  |    |           |           |               |
|-----------------|-------------|-------------|------------------|----|-----------|-----------|---------------|
| ENSG00000174111 | 5.637181576 | 5.212303549 | protein_coding   | 17 | 36508005  | 36556015  | SOCS7         |
| ENSG00000174123 | 0.499066092 | 0           | protein_coding   | 4  | 38773860  | 38784611  | TLR10         |
| ENSG00000174125 | 3.335220907 | 4.604259349 | protein_coding   | 4  | 38792298  | 38858438  | TLR1          |
| ENSG00000174130 | 6.244259325 | 7.176629214 | protein_coding   | 4  | 38825336  | 38858438  | TLR6          |
| ENSG00000174132 | 6.489593565 | 6.338437404 | protein_coding   | 5  | 99871009  | 99922445  | FAM174A       |
| ENSG00000174136 | 8.183497283 | 8.394645624 | protein_coding   | 5  | 98104354  | 98134347  | RGMB          |
| ENSG00000174137 | 4.230497448 | 5.09905904  | protein_coding   | 4  | 1619642   | 1686029   | FAM53A        |
| ENSG00000174151 | 7.119373418 | 7.126137778 | protein_coding   | 1  | 110036674 | 110045554 | CYB561D1      |
| ENSG00000174165 | 9.383841641 | 9.672543867 | protein_coding   | 11 | 66288108  | 66313709  | ZDHHC24       |
| ENSG00000174171 | 0.499066092 | 0.390640832 | processed_transc | 15 | 42184991  | 42189585  |               |
| ENSG00000174173 | 8.3480754   | 8.650504459 | protein_coding   | 3  | 101280706 | 101285290 | RG9MTD1       |
| ENSG00000174177 | 9.008829705 | 8.618900187 | protein_coding   | 16 | 88772871  | 88781794  | CTU2          |
| ENSG00000174194 | 3.989024711 | 3.813624741 | protein_coding   | 10 | 51224677  | 51252947  | AGAP8         |
| ENSG00000174197 | 10.06922944 | 10.00845419 | protein_coding   | 15 | 41913422  | 42062141  | MGA           |
| ENSG00000174206 | 7.242608348 | 6.716673044 | protein_coding   | 12 | 64580096  | 64616076  | C12orf66      |
| ENSG00000174225 | 1.16343121  | 1.353254395 | protein_coding   | X  | 100224697 | 100245818 | ARL13A        |
| ENSG00000174227 | 8.78516728  | 9.110276346 | protein_coding   | 4  | 492989    | 533985    | PIGG          |
| ENSG00000174231 | 13.14642762 | 13.48801226 | protein_coding   | 17 | 1553923   | 1588154   | PRPF8         |
| ENSG00000174233 | 7.666067113 | 8.211532164 | protein_coding   | 12 | 49159975  | 49182820  | ADCY6         |
| ENSG00000174236 | 0.499066092 | 0.950786998 | protein_coding   | 12 | 27849428  | 27850566  | REP15         |
| ENSG00000174238 | 10.24657122 | 10.64669035 | protein_coding   | 17 | 1421287   | 1466110   | PITPNA        |
| ENSG00000174243 | 9.815645694 | 9.994887996 | protein_coding   | 12 | 49223840  | 49246625  | DDX23         |
| ENSG00000174276 | 7.262161623 | 7.4317778   | protein_coding   | 11 | 64883875  | 64885170  | ZNHIT2        |
| ENSG00000174282 | 10.08083775 | 10.38975587 | protein_coding   | 17 | 7362685   | 7387517   | ZBTB4         |
| ENSG00000174292 | 8.052627651 | 7.76240224  | protein_coding   | 17 | 7284365   | 7293092   | TNK1          |
| ENSG00000174306 | 9.105088364 | 9.212125573 | protein_coding   | 20 | 39807088  | 39946312  | ZHX3          |
| ENSG00000174307 | 6.825495146 | 3.133298822 | protein_coding   | 1  | 201434620 | 201438365 | PHLDA3        |
| ENSG00000174325 | 0           | 0.390640832 | protein_coding   | 2  | 189598882 | 189654831 | DIRC1         |
| ENSG00000174326 | 2.671945279 | 2.788380093 | protein_coding   | 17 | 6944949   | 6947242   | SLC16A11      |
| ENSG00000174327 | 8.75235931  | 8.89250574  | protein_coding   | 17 | 6939477   | 6943438   | SLC16A13      |
| ENSG00000174332 | 0           | 0.697730409 | protein_coding   | 1  | 53971910  | 54199877  | GLIS1         |
| ENSG00000174343 | 0           | 1.16600992  | protein_coding   | 4  | 40337346  | 40357234  | CHRNA9        |
| ENSG00000174353 | 5.124761037 | 5.317302248 | protein_coding   | 7  | 72440227  | 72476445  | STAG3L3       |
| ENSG00000174358 | 0.499066092 | 0.950786998 | protein_coding   | 5  | 1201710   | 1225232   | SLC6A19       |
| ENSG00000174365 | 6.041940478 | 7.188980716 | processed_transc | 20 | 37075221  | 37079564  | SNHG11        |
| ENSG00000174368 | 0           | 0.697730409 | pseudogene       | 7  | 74880905  | 74988262  | PMS2P2        |
| ENSG00000174370 | 6.155035276 | 6.327306117 | protein_coding   | 11 | 128769460 | 128775930 | C11orf45      |
| ENSG00000174371 | 8.593182305 | 9.207579776 | protein_coding   | 1  | 242011269 | 242058450 | EXO1          |
| ENSG00000174373 | 6.902274257 | 7.170413581 | protein_coding   | 14 | 36007558  | 36278510  | RALGAPA1      |
| ENSG00000174374 | 8.977234519 | 8.672662438 | protein_coding   | 7  | 74441226  | 74490064  | WBSCR16       |
| ENSG00000174403 | 0.499066092 | 0.390640832 | antisense        | 20 | 61141550  | 61148733  | C20orf166-AS1 |
| ENSG00000174405 | 6.509364082 | 6.811590016 | protein_coding   | 13 | 108859794 | 108870716 | LIG4          |
| ENSG00000174417 | 0           | 0.697730409 | protein_coding   | 8  | 110098850 | 110131813 | TRHR          |
| ENSG00000174428 | 3.989024711 | 3.368666104 | protein_coding   | 7  | 74508364  | 74767788  | GTF2IRD2B     |
| ENSG00000174429 | 0.499066092 | 0.697730409 | protein_coding   | 8  | 107771711 | 107782473 | ABRA          |
| ENSG00000174437 | 11.65625525 | 11.23712609 | protein_coding   | 12 | 110718561 | 110788898 | ATP2A2        |
| ENSG00000174442 | 8.568265199 | 8.922403049 | protein_coding   | 15 | 66797297  | 66842115  | ZWILCH        |
| ENSG00000174444 | 12.64955038 | 12.95642923 | protein_coding   | 15 | 66790355  | 66816870  | RPL4          |
| ENSG00000174446 | 7.0218028   | 7.295628905 | protein_coding   | 15 | 66782644  | 66790151  | SNAPC5        |
| ENSG00000174448 | 0           | 0.390640832 | protein_coding   | 18 | 51850964  | 51880943  | STARD6        |
| ENSG00000174450 | 1.407729925 | 0.950786998 | protein_coding   | 15 | 23684645  | 23692381  | GOLGA6L2      |
| ENSG00000174456 | 5.270908378 | 5.555337277 | protein_coding   | 12 | 110465521 | 110511491 | C12orf76      |
| ENSG00000174460 | 0.499066092 | 0           | protein_coding   | X  | 117957753 | 117960931 | ZCCHC12       |
| ENSG00000174469 | 0.499066092 | 2.501982735 | protein_coding   | 7  | 145813453 | 148118090 | CNTNAP2       |
| ENSG00000174473 | 0.499066092 | 0.697730409 | protein_coding   | 4  | 172733405 | 173962710 | GALNTL6       |
| ENSG00000174483 | 4.6658819   | 5.271576845 | protein_coding   | 11 | 66278077  | 66301098  | BBS1          |
| ENSG00000174485 | 7.981274537 | 8.081759401 | protein_coding   | 15 | 65950384  | 66084631  | DENND4A       |
| ENSG00000174498 | 0           | 0.390640832 | protein_coding   | 15 | 65619465  | 65670378  | IGDCC3        |
| ENSG00000174500 | 4.842525946 | 4.676215056 | protein_coding   | 3  | 111839688 | 111852152 | GCET2         |
| ENSG00000174501 | 4.942865586 | 4.857374129 | protein_coding   | 2  | 96514587  | 96657541  | ANKRD36C      |
| ENSG00000174502 | 1.16343121  | 1.16600992  | protein_coding   | 1  | 205882176 | 205912588 | SLC26A9       |
| ENSG00000174514 | 2.762599152 | 2.851901313 | protein_coding   | 1  | 205538013 | 205572046 | MFSD4         |
| ENSG00000174516 | 7.921045056 | 8.157562549 | protein_coding   | 11 | 66234216  | 66244808  | PELI3         |

|                 |             |             |                |    |           |           |           |
|-----------------|-------------|-------------|----------------|----|-----------|-----------|-----------|
| ENSG00000174521 | 1.16343121  | 0.697730409 | protein_coding | 19 | 40721965  | 40724306  | TTC9B     |
| ENSG00000174527 | 1.960915222 | 2.579085888 | protein_coding | 12 | 109826524 | 109893328 | MYO1H     |
| ENSG00000174529 | 4.491309013 | 3.570966319 | protein_coding | 1  | 205052258 | 205053645 | TMEM81    |
| ENSG00000174547 | 10.45165245 | 10.52408771 | protein_coding | 11 | 66202546  | 66234209  | MRPL11    |
| ENSG00000174564 | 6.835971536 | 4.903073497 | protein_coding | 3  | 136665072 | 136729927 | IL20RB    |
| ENSG00000174567 | 3.335220907 | 2.971122874 | protein_coding | 1  | 204167288 | 204183220 | GOLT1A    |
| ENSG00000174572 | 0.499066092 | 0.697730409 | pseudogene     | 6  | 27179023  | 27179663  |           |
| ENSG00000174574 | 8.557227164 | 8.251828705 | protein_coding | 1  | 39456895  | 39471731  | AKIRIN1   |
| ENSG00000174579 | 8.807962967 | 8.157562549 | protein_coding | 3  | 135867764 | 135916083 | MSL2      |
| ENSG00000174586 | 7.787084643 | 7.70765368  | protein_coding | 19 | 58865725  | 58874120  | ZNF497    |
| ENSG00000174599 | 3.211941663 | 4.744751758 | protein_coding | 4  | 118004718 | 118006736 | TRAM1L1   |
| ENSG00000174600 | 0           | 0.697730409 | protein_coding | 12 | 108681821 | 108733118 | CMKLR1    |
| ENSG00000174606 | 8.05038018  | 8.410554709 | protein_coding | 1  | 213165524 | 213189168 | ANGEL2    |
| ENSG00000174607 | 5.270908378 | 0.950786998 | protein_coding | 4  | 115519611 | 115599380 | UGT8      |
| ENSG00000174611 | 0           | 0.390640832 | protein_coding | 3  | 134321980 | 134370478 | KY        |
| ENSG00000174628 | 7.273767634 | 7.161039629 | protein_coding | 16 | 19727778  | 19868907  | IQCK      |
| ENSG00000174640 | 3.146112541 | 1.518964905 | protein_coding | 3  | 133651540 | 133771028 | SLCO2A1   |
| ENSG00000174652 | 9.918423401 | 10.53016835 | protein_coding | 19 | 9523272   | 9546234   | ZNF266    |
| ENSG00000174669 | 8.678607554 | 7.57041104  | protein_coding | 11 | 66129992  | 66139685  | SLC29A2   |
| ENSG00000174672 | 7.853042529 | 7.480322213 | protein_coding | 11 | 1411129   | 1483919   | BRSK2     |
| ENSG00000174684 | 7.923503136 | 7.809160246 | protein_coding | 11 | 66112843  | 66115163  | B3GNT1    |
| ENSG00000174695 | 9.712107084 | 9.711058296 | protein_coding | 5  | 82348665  | 82373682  | TMEM167A  |
| ENSG00000174705 | 9.166560209 | 9.148724524 | protein_coding | 5  | 171752185 | 171881527 | SH3PXD2B  |
| ENSG00000174715 | 1.16343121  | 0.950786998 | pseudogene     | 3  | 138362716 | 138363536 |           |
| ENSG00000174718 | 10.38454676 | 9.977637634 | protein_coding | 12 | 32112304  | 32146039  | C12orf35  |
| ENSG00000174720 | 7.981274537 | 8.529454305 | protein_coding | 4  | 113558120 | 113578748 | LARP7     |
| ENSG00000174721 | 3.077135474 | 4.29708397  | protein_coding | 10 | 93666346  | 93669240  | FGFBP3    |
| ENSG00000174738 | 8.112022537 | 8.441856054 | protein_coding | 3  | 23986751  | 24021237  | NR1D2     |
| ENSG00000174744 | 9.43383913  | 9.588211811 | protein_coding | 11 | 66104804  | 66112596  | BRMS1     |
| ENSG00000174748 | 10.99538144 | 11.4288133  | protein_coding | 3  | 23958036  | 23965183  | RPL15     |
| ENSG00000174749 | 7.789781675 | 7.879433769 | protein_coding | 4  | 113066553 | 113110237 | C4orf32   |
| ENSG00000174775 | 8.42468852  | 7.944622739 | protein_coding | 11 | 532242    | 537287    | HRAS      |
| ENSG00000174776 | 0.869158192 | 0           | protein_coding | 3  | 167196472 | 167371771 | WDR49     |
| ENSG00000174780 | 10.60691245 | 10.5994706  | protein_coding | 4  | 57333081  | 57369846  | SRP72     |
| ENSG00000174788 | 1.616589159 | 1.925536307 | protein_coding | 19 | 7696509   | 7698570   | PCP2      |
| ENSG00000174791 | 8.735671237 | 8.127396674 | protein_coding | 11 | 66097713  | 66104311  | RIN1      |
| ENSG00000174792 | 1.407729925 | 3.411459265 | protein_coding | 4  | 76481258  | 76491095  | C4orf26   |
| ENSG00000174796 | 6.068837212 | 6.485878328 | protein_coding | 4  | 76439156  | 76475683  | THAP6     |
| ENSG00000174799 | 6.917151646 | 7.63953919  | protein_coding | 4  | 56815037  | 56899270  | CEP135    |
| ENSG00000174804 | 6.112579918 | 5.80042639  | protein_coding | 11 | 86656721  | 86666433  | FZD4      |
| ENSG00000174807 | 0.499066092 | 0.390640832 | protein_coding | 11 | 66081958  | 66084515  | CD248     |
| ENSG00000174808 | 3.448790144 | 3.368666104 | protein_coding | 4  | 75669969  | 75719896  | BTC       |
| ENSG00000174827 | 3.004694206 | 2.144285137 | protein_coding | 1  | 145726918 | 145764074 | PDZK1     |
| ENSG00000174837 | 2.471521042 | 1.518964905 | protein_coding | 19 | 6887582   | 6952102   | EMR1      |
| ENSG00000174839 | 8.259402007 | 8.238521194 | protein_coding | 3  | 57611184  | 57678816  | FAM116A   |
| ENSG00000174840 | 8.783815073 | 8.482561984 | protein_coding | 3  | 57542003  | 57547684  | PDE12     |
| ENSG00000174842 | 6.496213887 | 6.95589788  | protein_coding | 1  | 92711959  | 92764544  | GLMN      |
| ENSG00000174844 | 1.799000381 | 1.353254395 | protein_coding | 3  | 57327727  | 57530071  | DNAH12    |
| ENSG00000174851 | 9.830784156 | 10.24310134 | protein_coding | 11 | 66052051  | 66056641  | YIF1A     |
| ENSG00000174871 | 3.146112541 | 3.279072565 | protein_coding | 11 | 66045661  | 66052772  | CNIH2     |
| ENSG00000174885 | 3.652182994 | 2.242360793 | protein_coding | 11 | 278365    | 285359    | NLRP6     |
| ENSG00000174886 | 7.356139979 | 8.129000175 | protein_coding | 19 | 5892928   | 5904025   | NDUFA11   |
| ENSG00000174891 | 8.148202495 | 8.056703738 | protein_coding | 3  | 157823644 | 158263519 | RSRC1     |
| ENSG00000174898 | 1.16343121  | 0.697730409 | protein_coding | 19 | 5720688   | 5778745   | TMEM146   |
| ENSG00000174899 | 3.448790144 | 4.29708397  | protein_coding | 3  | 157261035 | 157395538 | C3orf55   |
| ENSG00000174903 | 10.38811071 | 10.2684207  | protein_coding | 11 | 66036004  | 66044963  | RAB1B     |
| ENSG00000174912 | 0.499066092 | 0           | pseudogene     | 3  | 156431673 | 156432717 | METTL15P1 |
| ENSG00000174915 | 8.541310587 | 8.598211347 | protein_coding | 11 | 448268    | 491393    | PTDSS2    |
| ENSG00000174917 | 9.46032044  | 10.14349205 | protein_coding | 19 | 5678433   | 5680911   | C19orf70  |
| ENSG00000174928 | 5.175139844 | 5.018301917 | protein_coding | 3  | 155480401 | 155524140 | C3orf33   |
| ENSG00000174938 | 9.250208226 | 9.828213847 | protein_coding | 16 | 29882480  | 29910868  | SEZ6L2    |
| ENSG00000174939 | 7.803191723 | 8.015686953 | protein_coding | 16 | 29911696  | 29931185  | ASPHD1    |
| ENSG00000174943 | 8.274885464 | 8.347216179 | protein_coding | 16 | 29916333  | 29938356  | KCTD13    |

|                 |             |             |                  |    |           |           |              |
|-----------------|-------------|-------------|------------------|----|-----------|-----------|--------------|
| ENSG00000174945 | 3.554067925 | 2.912743273 | protein_coding   | 7  | 2719156   | 2804759   | AMZ1         |
| ENSG00000174950 | 2.10647801  | 0.390640832 | protein_coding   | 1  | 27705666  | 27709870  | CD164L2      |
| ENSG00000174951 | 6.386460534 | 5.112089758 | protein_coding   | 19 | 49251268  | 49258647  | FUT1         |
| ENSG00000174953 | 9.660729799 | 9.378413761 | protein_coding   | 3  | 153990335 | 154042286 | DHX36        |
| ENSG00000174977 | 0.499066092 | 1.667587519 | pseudogene       | 17 | 18553508  | 18554855  |              |
| ENSG00000174989 | 8.282565319 | 8.402622096 | protein_coding   | 12 | 117348761 | 117470180 | FBXW8        |
| ENSG00000174990 | 0           | 0.390640832 | protein_coding   | 16 | 87921625  | 87970135  | CASA         |
| ENSG00000174992 | 0           | 0.390640832 | protein_coding   | 16 | 29789561  | 29793096  | ZG16         |
| ENSG00000174996 | 10.04403543 | 9.908831886 | protein_coding   | 11 | 66024765  | 66035331  | KLC2         |
| ENSG00000175003 | 3.911897206 | 4.585695337 | protein_coding   | 6  | 160542821 | 160579750 | SLC22A1      |
| ENSG00000175029 | 9.953123981 | 10.11586039 | protein_coding   | 10 | 126676421 | 126849739 | CTBP2        |
| ENSG00000175048 | 7.381392865 | 7.348889996 | protein_coding   | 6  | 157802165 | 158099178 | ZDHC14       |
| ENSG00000175054 | 9.30119149  | 9.260474903 | protein_coding   | 3  | 142168077 | 142297668 | ATR          |
| ENSG00000175061 | 12.03080722 | 12.11630032 | non_coding       | 17 | 16342289  | 16367300  | C17orf76-AS1 |
| ENSG00000175063 | 10.20018826 | 10.26696498 | protein_coding   | 20 | 44441215  | 44445596  | UBE2C        |
| ENSG00000175066 | 7.474855471 | 7.549009758 | protein_coding   | 3  | 141882414 | 141944449 | GK5          |
| ENSG00000175073 | 8.962967004 | 8.301022059 | protein_coding   | 8  | 67540722  | 67579452  | VCIPI1       |
| ENSG00000175084 | 4.77879189  | 4.319727133 | protein_coding   | 2  | 220283099 | 220291461 | DES          |
| ENSG00000175087 | 6.155035276 | 6.434933235 | protein_coding   | 1  | 26437664  | 26452034  | PDIK1L       |
| ENSG00000175097 | 0.499066092 | 0.390640832 | protein_coding   | 11 | 36597124  | 36619829  | RAG2         |
| ENSG00000175104 | 6.386460534 | 6.866449614 | protein_coding   | 11 | 36508577  | 36531822  | TRAF6        |
| ENSG00000175105 | 6.681890601 | 6.839280559 | protein_coding   | 3  | 88188254  | 88193815  | ZNF654       |
| ENSG00000175106 | 5.588445295 | 5.855704078 | protein_coding   | 17 | 15341205  | 15466945  | FAM18B2      |
| ENSG00000175110 | 8.337054268 | 8.620040914 | protein_coding   | 3  | 138724648 | 139076065 | MRPS22       |
| ENSG00000175115 | 10.48490234 | 10.14547392 | protein_coding   | 11 | 65837834  | 66012218  | PACS1        |
| ENSG00000175121 | 0           | 0.390640832 | protein_coding   | 20 | 43738093  | 43743813  | WFDC5        |
| ENSG00000175130 | 9.679029815 | 9.859458974 | protein_coding   | 1  | 32799433  | 32801980  | MARCKSL1     |
| ENSG00000175137 | 9.006512903 | 9.472987904 | protein_coding   | 1  | 249104648 | 249120832 | SH3BP5L      |
| ENSG00000175147 | 1.960915222 | 0.950786998 | processed_transc | 1  | 15442448  | 15478960  | C1orf126     |
| ENSG00000175155 | 6.766474304 | 6.424524724 | protein_coding   | 17 | 57409053  | 57479095  | YPEL2        |
| ENSG00000175161 | 0.869158192 | 0           | protein_coding   | 3  | 85008132  | 86123579  | CADM2        |
| ENSG00000175164 | 0.869158192 | 0           | processed_transc | 9  | 136131053 | 136150617 | ABO          |
| ENSG00000175166 | 12.59950889 | 12.55590422 | protein_coding   | 3  | 184016497 | 184026842 | PSMD2        |
| ENSG00000175170 | 5.60078458  | 6.465715653 | protein_coding   | 20 | 25744102  | 25848786  | FAM182B      |
| ENSG00000175175 | 6.93675248  | 7.070480904 | protein_coding   | 17 | 56833232  | 57062532  | PPM1E        |
| ENSG00000175182 | 7.850461307 | 7.780879746 | protein_coding   | 3  | 184053714 | 184064063 | FAM131A      |
| ENSG00000175183 | 6.469548347 | 7.38691391  | protein_coding   | 12 | 77252495  | 77272840  | CSRP2        |
| ENSG00000175189 | 1.960915222 | 1.802319292 | protein_coding   | 12 | 57828527  | 57845842  | INHBC        |
| ENSG00000175193 | 8.455589162 | 8.289597152 | protein_coding   | 3  | 183547173 | 183602721 | PARL         |
| ENSG00000175197 | 6.760987087 | 7.842771865 | protein_coding   | 12 | 57910371  | 57914300  | DDIT3        |
| ENSG00000175198 | 7.285281023 | 7.225413142 | protein_coding   | 13 | 100741269 | 101182686 | PCCA         |
| ENSG00000175203 | 10.42240548 | 10.74093244 | protein_coding   | 12 | 57923885  | 57941114  | DCTN2        |
| ENSG00000175206 | 3.393122761 | 3.411459265 | protein_coding   | 1  | 11905766  | 11908402  | NPPA         |
| ENSG00000175213 | 7.478203418 | 7.556178852 | protein_coding   | 11 | 46722368  | 46727462  | ZNF408       |
| ENSG00000175215 | 11.26038994 | 11.02249463 | protein_coding   | 12 | 58213710  | 58240522  | CTDSP2       |
| ENSG00000175216 | 11.49187142 | 11.47067432 | protein_coding   | 11 | 46764598  | 46867847  | CKAP5        |
| ENSG00000175220 | 10.31650661 | 10.14745308 | protein_coding   | 11 | 46698630  | 46722165  | ARHGAP1      |
| ENSG00000175221 | 9.825536602 | 9.823765224 | protein_coding   | 19 | 867964    | 893218    | MED16        |
| ENSG00000175224 | 10.26413304 | 10.15219202 | protein_coding   | 11 | 46638826  | 46696368  | ATG13        |
| ENSG00000175229 | 0.499066092 | 0.950786998 | protein_coding   | 11 | 65809423  | 65816651  | GAL3ST3      |
| ENSG00000175262 | 0.499066092 | 0           | protein_coding   | 1  | 11006528  | 11042094  | C1orf127     |
| ENSG00000175264 | 1.799000381 | 0           | protein_coding   | 11 | 45670427  | 45687172  | CHST1        |
| ENSG00000175265 | 5.375152132 | 6.25865215  | protein_coding   | 15 | 34671269  | 34880704  | GOLGA8A      |
| ENSG00000175267 | 0.499066092 | 0           | protein_coding   | 16 | 22103859  | 22168287  | VWA3A        |
| ENSG00000175274 | 10.03724206 | 9.936566069 | protein_coding   | 11 | 44907454  | 44972840  | TP53I11      |
| ENSG00000175279 | 5.929039784 | 6.577981353 | protein_coding   | 1  | 10490159  | 10512210  | APITD1       |
| ENSG00000175283 | 8.094677541 | 8.199373043 | protein_coding   | 9  | 131707809 | 131709898 | DOLK         |
| ENSG00000175287 | 3.78787645  | 2.501982735 | protein_coding   | 9  | 131683174 | 131704320 | PHYHD1       |
| ENSG00000175294 | 4.409500985 | 4.585695337 | protein_coding   | 11 | 65784223  | 65793988  | CATSPER1     |
| ENSG00000175305 | 5.550781289 | 6.016808232 | protein_coding   | 8  | 95891998  | 95908906  | CCNE2        |
| ENSG00000175309 | 7.768062907 | 7.544210495 | protein_coding   | 5  | 177635498 | 177659792 | AGXT2L2      |
| ENSG00000175311 | 1.16343121  | 1.16600992  | protein_coding   | 16 | 21245016  | 21263750  | ANKS4B       |
| ENSG00000175315 | 4.464551814 | 1.518964905 | protein_coding   | 11 | 65779312  | 65780976  | CST6         |

|                 |             |             |                  |    |           |           |           |
|-----------------|-------------|-------------|------------------|----|-----------|-----------|-----------|
| ENSG00000175318 | 3.871730003 | 3.32456471  | protein_coding   | 15 | 72452148  | 72490126  | GRAMD2    |
| ENSG00000175322 | 5.417620896 | 5.283144778 | protein_coding   | 18 | 14099942  | 14132489  | ZNF519    |
| ENSG00000175324 | 6.298293508 | 6.815578497 | protein_coding   | 8  | 38020839  | 38034248  | LSM1      |
| ENSG00000175329 | 1.407729925 | 2.039052734 | protein_coding   | 22 | 35462129  | 35486030  | ISX       |
| ENSG00000175334 | 10.31369837 | 10.76845662 | protein_coding   | 11 | 65769550  | 65771620  | BANF1     |
| ENSG00000175336 | 0.499066092 | 0           | protein_coding   | 12 | 56754353  | 56756607  | APOF      |
| ENSG00000175344 | 2.238690726 | 2.420525079 | protein_coding   | 15 | 30875128  | 32464722  | CHRNA7    |
| ENSG00000175348 | 8.280649185 | 8.467431533 | protein_coding   | 11 | 8968841   | 8986558   | TMEM9B    |
| ENSG00000175352 | 7.210761201 | 6.952279523 | protein_coding   | 11 | 9002123   | 9025596   | NRIP3     |
| ENSG00000175354 | 7.96466218  | 7.953699568 | protein_coding   | 18 | 12785477  | 12884337  | PTPN2     |
| ENSG00000175356 | 0.499066092 | 2.144285137 | protein_coding   | 11 | 9041071   | 9159661   | SCUBE2    |
| ENSG00000175376 | 8.523597116 | 8.319396705 | protein_coding   | 11 | 65764016  | 65769647  | EIF1AD    |
| ENSG00000175387 | 9.356814297 | 9.424191842 | protein_coding   | 18 | 45357922  | 45457515  | SMAD2     |
| ENSG00000175390 | 9.963910896 | 10.41363432 | protein_coding   | 11 | 7991798   | 8023409   | EIF3F     |
| ENSG00000175395 | 5.660945913 | 7.246248121 | protein_coding   | 10 | 38238500  | 38265561  | ZNF25     |
| ENSG00000175414 | 2.57521082  | 3.906303962 | protein_coding   | 5  | 175792471 | 175828866 | ARL10     |
| ENSG00000175416 | 9.233465948 | 9.471092709 | protein_coding   | 5  | 175819456 | 175843570 | CLTB      |
| ENSG00000175426 | 0.499066092 | 0.950786998 | protein_coding   | 5  | 95726119  | 95769847  | PCSK1     |
| ENSG00000175449 | 3.335220907 | 3.748356452 | protein_coding   | 5  | 94982458  | 94993786  | RFESD     |
| ENSG00000175455 | 9.072234198 | 9.801313989 | protein_coding   | 3  | 123616152 | 123680564 | CCDC14    |
| ENSG00000175463 | 6.103936836 | 5.259915406 | protein_coding   | 11 | 67171386  | 67177560  | TBC1D10C  |
| ENSG00000175467 | 10.49319987 | 10.39242863 | protein_coding   | 11 | 65729160  | 65747299  | SART1     |
| ENSG00000175470 | 8.508940744 | 8.583082711 | protein_coding   | 10 | 133747955 | 133773331 | PPP2R2D   |
| ENSG00000175471 | 6.146643566 | 5.886365696 | protein_coding   | 5  | 94039446  | 94620279  | MCTP1     |
| ENSG00000175482 | 7.609180529 | 7.747865429 | protein_coding   | 11 | 67118248  | 67124443  | POLD4     |
| ENSG00000175489 | 0           | 0.697730409 | protein_coding   | 19 | 18501955  | 18508415  | LRRC25    |
| ENSG00000175505 | 9.049908262 | 8.633659743 | protein_coding   | 11 | 67131639  | 67141648  | LCFC1     |
| ENSG00000175509 | 0.869158192 | 0           | pseudogene       | 2  | 114425056 | 114426201 |           |
| ENSG00000175514 | 0           | 0.390640832 | protein_coding   | 11 | 67218772  | 67220200  | GPR152    |
| ENSG00000175518 | 3.211941663 | 3.133298822 | protein_coding   | 11 | 5535623   | 5537935   | UBQLNL    |
| ENSG00000175536 | 2.847891871 | 3.493416095 | protein_coding   | 11 | 74202757  | 74204778  | LIPT2     |
| ENSG00000175544 | 5.795854912 | 5.163066621 | protein_coding   | 11 | 67219877  | 67226699  | CABP4     |
| ENSG00000175548 | 5.223818625 | 6.3217081   | protein_coding   | 12 | 38710380  | 38717784  | ALG10B    |
| ENSG00000175550 | 9.931305133 | 9.930602076 | protein_coding   | 11 | 65686728  | 65689032  | DRAP1     |
| ENSG00000175556 | 7.266040677 | 7.219404604 | protein_coding   | X  | 118108581 | 118156888 | LONRF3    |
| ENSG00000175564 | 3.603959378 | 3.453019579 | protein_coding   | 11 | 73711326  | 73720480  | UCP3      |
| ENSG00000175567 | 9.068907253 | 8.504964228 | protein_coding   | 11 | 73685712  | 73694352  | UCP2      |
| ENSG00000175573 | 8.786518219 | 9.147142808 | protein_coding   | 11 | 65684279  | 65686588  | C11orf68  |
| ENSG00000175575 | 7.206730419 | 7.436965343 | protein_coding   | 11 | 73587744  | 73638790  | PAAF1     |
| ENSG00000175581 | 7.827020104 | 8.036341107 | protein_coding   | 11 | 73498361  | 73576178  | MRPL48    |
| ENSG00000175582 | 9.832093067 | 9.746483542 | protein_coding   | 11 | 73386938  | 73472182  | RAB6A     |
| ENSG00000175591 | 6.788216822 | 5.404622322 | protein_coding   | 11 | 72929343  | 72947397  | P2RY2     |
| ENSG00000175592 | 10.8899802  | 10.10612397 | protein_coding   | 11 | 65659490  | 65668044  | FOSL1     |
| ENSG00000175595 | 7.803191723 | 7.918899532 | protein_coding   | 16 | 14014014  | 14046205  | ERCC4     |
| ENSG00000175600 | 3.744048221 | 4.101879561 | protein_coding   | 7  | 40174575  | 40900362  | C7orf10   |
| ENSG00000175602 | 9.904181598 | 10.29580387 | protein_coding   | 11 | 65657875  | 65659105  | CCDC85B   |
| ENSG00000175604 | 0.869158192 | 0.950786998 | protein_coding   | 16 | 12180603  | 12184159  |           |
| ENSG00000175606 | 7.352496068 | 7.487839978 | protein_coding   | 8  | 74884672  | 74895018  | TMEM70    |
| ENSG00000175611 | 4.903563137 | 5.564846512 | processed_transc | 9  | 98520892  | 98638259  | LINC00476 |
| ENSG00000175634 | 10.25293768 | 10.25085438 | protein_coding   | 11 | 67195931  | 67202872  | RPS6KB2   |
| ENSG00000175643 | 8.137655191 | 8.116121984 | protein_coding   | 16 | 11410636  | 11445619  | RM12      |
| ENSG00000175662 | 8.29020451  | 8.833738534 | protein_coding   | 17 | 17750139  | 17875784  | TOM1L2    |
| ENSG00000175691 | 6.095241663 | 6.009862691 | protein_coding   | 19 | 2896754   | 2944969   | ZNF77     |
| ENSG00000175697 | 4.062237333 | 4.274079748 | protein_coding   | 3  | 119883492 | 120003941 | GPR156    |
| ENSG00000175699 | 0.869158192 | 0.390640832 | processed_transc | 14 | 94463616  | 94478040  | LINC00521 |
| ENSG00000175701 | 6.509364082 | 6.624193585 | lincRNA          | 2  | 110969106 | 111002997 | LINC00116 |
| ENSG00000175707 | 5.018397273 | 0.390640832 | protein_coding   | 1  | 27276053  | 27286897  | C1orf172  |
| ENSG00000175711 | 7.514527001 | 7.799123587 | protein_coding   | 17 | 80901672  | 81009686  | B3GNTL1   |
| ENSG00000175727 | 10.19968132 | 9.671994    | protein_coding   | 12 | 122516628 | 122629266 | MLXIP     |
| ENSG00000175728 | 0.499066092 | 0.390640832 | protein_coding   | 11 | 130542851 | 130587247 | C11orf44  |
| ENSG00000175730 | 4.230497448 | 4.342020395 | pseudogene       | 20 | 31276723  | 31278816  | BAK1P1    |
| ENSG00000175741 | 0.499066092 | 2.039052734 | pseudogene       | 7  | 39894093  | 39894655  | RWDD4P2   |
| ENSG00000175745 | 5.417620896 | 3.96493948  | protein_coding   | 5  | 92919043  | 92930321  | NR2F1     |

|                 |             |             |                  |    |           |                    |
|-----------------|-------------|-------------|------------------|----|-----------|--------------------|
| ENSG00000175749 | 0.869158192 | 0.390640832 | pseudogene       | 5  | 102368080 | 102368735          |
| ENSG00000175756 | 9.636212778 | 9.982524041 | protein_coding   | 1  | 1309110   | 1310875 AURKAIP1   |
| ENSG00000175764 | 5.538004898 | 6.35497494  | protein_coding   | 9  | 124584207 | 124855885 TTL11    |
| ENSG00000175768 | 6.462804234 | 6.592001111 | protein_coding   | 9  | 37582643  | 37592639 TOMM5     |
| ENSG00000175772 | 3.335220907 | 2.721932731 | processed_transc | 2  | 111132715 | 111142019          |
| ENSG00000175773 | 1.616589159 | 1.667587519 | protein_coding   | 11 | 130184419 | 130273133          |
| ENSG00000175782 | 6.92698535  | 6.750400563 | protein_coding   | 12 | 69139886  | 69187744 SLC35E3   |
| ENSG00000175787 | 5.60078458  | 5.878761167 | protein_coding   | 9  | 97021593  | 97063736 ZNF169    |
| ENSG00000175792 | 10.36342886 | 10.10815782 | protein_coding   | 3  | 127783625 | 127872757 RUVBL1   |
| ENSG00000175793 | 11.782303   | 9.798293919 | protein_coding   | 1  | 27189633  | 27190947 SFN       |
| ENSG00000175806 | 6.220467583 | 6.544728831 | protein_coding   | 8  | 9911778   | 10286401 MSRA      |
| ENSG00000175820 | 0.499066092 | 1.518964905 | protein_coding   | 13 | 103381801 | 103389159 CCDC168  |
| ENSG00000175826 | 10.80554674 | 10.89235302 | protein_coding   | 17 | 7146910   | 7155280 CTDNEP1    |
| ENSG00000175832 | 9.123378905 | 8.497535398 | protein_coding   | 17 | 41605212  | 41623762 ETV4      |
| ENSG00000175841 | 1.16343121  | 0.390640832 | pseudogene       | 3  | 101237711 | 101242731 FAM172BP |
| ENSG00000175854 | 7.842689815 | 8.066778281 | protein_coding   | 9  | 131037658 | 131051269 SWI5     |
| ENSG00000175866 | 8.889432943 | 8.647151213 | protein_coding   | 17 | 79008947  | 79091232 BAIAP2    |
| ENSG00000175873 | 5.331395195 | 5.583678991 | lincRNA          | 7  | 2477398   | 2487485            |
| ENSG00000175874 | 1.960915222 | 0.697730409 | protein_coding   | 2  | 101965209 | 102004057 CREG2    |
| ENSG00000175877 | 1.616589159 | 1.353254395 | protein_coding   | 7  | 73275489  | 73280223 WBSCR28   |
| ENSG00000175879 | 1.16343121  | 1.667587519 | protein_coding   | 2  | 176994422 | 176997423 HOXD8    |
| ENSG00000175886 | 1.616589159 | 0.697730409 | pseudogene       | 18 | 36914836  | 36915639           |
| ENSG00000175892 | 0           | 0.950786998 | protein_coding   | 2  | 176992555 | 176994493          |
| ENSG00000175893 | 4.642199401 | 5.536128679 | protein_coding   | 9  | 14615530  | 14693469 ZDHC21    |
| ENSG00000175894 | 5.124761037 | 4.566889334 | protein_coding   | 21 | 45917775  | 46131495 TSPEAR    |
| ENSG00000175895 | 6.469548347 | 6.338437404 | protein_coding   | 8  | 96146032  | 96168912 PLEKHF2   |
| ENSG00000175898 | 7.416718478 | 6.858739095 | protein_coding   | 19 | 10332109  | 10341948 S1PR2     |
| ENSG00000175899 | 0.499066092 | 0           | protein_coding   | 12 | 9220260   | 9268825 A2M        |
| ENSG00000175906 | 6.298293508 | 5.41517489  | protein_coding   | 17 | 41476353  | 41478503 ARL4D     |
| ENSG00000175911 | 4.322773689 | 2.579085888 | protein_coding   | 17 | 78977135  | 78978932           |
| ENSG00000175920 | 4.593635215 | 2.144285137 | protein_coding   | 4  | 3465033   | 3503200 DOK7       |
| ENSG00000175928 | 0           | 0.390640832 | protein_coding   | 3  | 3841121   | 3889387 LRRN1      |
| ENSG00000175931 | 9.631710027 | 9.341545886 | protein_coding   | 17 | 74385614  | 74449288 UBE2O     |
| ENSG00000175938 | 7.384964606 | 7.281279771 | protein_coding   | 16 | 30960387  | 30967782 ORAI3     |
| ENSG00000175946 | 2.928422289 | 1.353254395 | protein_coding   | 8  | 124657767 | 124665190 KLHL38   |
| ENSG00000175970 | 9.001868107 | 8.741364159 | protein_coding   | 12 | 121148238 | 121161443 UNC119B  |
| ENSG00000175984 | 4.352265886 | 3.532712221 | protein_coding   | 1  | 115125469 | 115213043 DENND2C  |
| ENSG00000175985 | 1.16343121  | 1.667587519 | protein_coding   | 14 | 69951409  | 69995215 PLEKHD1   |
| ENSG00000176007 | 0.499066092 | 0.390640832 | protein_coding   | 9  | 38526663  | 38528800 C9orf51   |
| ENSG00000176009 | 1.407729925 | 1.802319292 | protein_coding   | 11 | 8959119   | 8964580 ASCL3      |
| ENSG00000176014 | 10.93239798 | 11.03345232 | protein_coding   | 18 | 12308070  | 12326568 TUBB6     |
| ENSG00000176018 | 1.16343121  | 1.353254395 | protein_coding   | 5  | 89811428  | 89825401 LYSMD3    |
| ENSG00000176022 | 8.727254249 | 8.672662438 | protein_coding   | 1  | 1167629   | 1170421 B3GALT6    |
| ENSG00000176024 | 6.509364082 | 6.750400563 | protein_coding   | 19 | 52430688  | 52449045 ZNF613    |
| ENSG00000176029 | 1.407729925 | 2.652276565 | protein_coding   | 11 | 8941623   | 8954553 C11orf16   |
| ENSG00000176040 | 0.499066092 | 0.697730409 | protein_coding   | 3  | 111753690 | 111800116 TMPRSS7  |
| ENSG00000176043 | 0.499066092 | 0           | pseudogene       | 14 | 73396320  | 73396638           |
| ENSG00000176046 | 7.876068031 | 8.953504395 | protein_coding   | 16 | 28548606  | 28550495 NUPR1     |
| ENSG00000176054 | 1.960915222 | 2.242360793 | pseudogene       | 21 | 30369934  | 30370354 RPL23P2   |
| ENSG00000176055 | 1.616589159 | 1.518964905 | protein_coding   | 5  | 89754020  | 89770585 MBLAC2    |
| ENSG00000176058 | 7.776245808 | 7.994732806 | protein_coding   | 9  | 140086069 | 140098645 TPRN     |
| ENSG00000176076 | 0.869158192 | 1.353254395 | protein_coding   | X  | 108866929 | 108868393 KCNE1L   |
| ENSG00000176087 | 10.14648923 | 9.633537922 | protein_coding   | 5  | 139944041 | 139948688 SLC35A4  |
| ENSG00000176092 | 4.097495944 | 2.721932731 | protein_coding   | 1  | 26648350  | 26680621 AIM1L     |
| ENSG00000176095 | 9.154055005 | 9.210611898 | protein_coding   | 3  | 49761727  | 49823975 IP6K1     |
| ENSG00000176101 | 9.064459359 | 9.317839931 | protein_coding   | 9  | 140083099 | 140084822 SSNA1    |
| ENSG00000176102 | 8.185546801 | 8.547552846 | protein_coding   | 11 | 33098734  | 33183917 CSTF3     |
| ENSG00000176105 | 9.953123981 | 9.460305991 | protein_coding   | 18 | 721588    | 812327 YES1        |
| ENSG00000176108 | 7.388527525 | 7.772696723 | protein_coding   | 17 | 78965641  | 78973932 CHMP6     |
| ENSG00000176124 | 6.121171528 | 5.878761167 | protein_coding   | 13 | 50656307  | 51298199 DLEU1     |
| ENSG00000176125 | 4.75690578  | 5.045726316 | protein_coding   | 7  | 100486346 | 100487339 UFSP1    |
| ENSG00000176134 | 0           | 0.390640832 | protein_coding   | 9  | 69650263  | 69660358           |
| ENSG00000176142 | 8.366258896 | 8.579568843 | protein_coding   | 3  | 119148347 | 119187677 TMEM39A  |

|                 |             |             |                |    |           |           |           |
|-----------------|-------------|-------------|----------------|----|-----------|-----------|-----------|
| ENSG00000176148 | 7.834876234 | 8.235547225 | protein_coding | 11 | 33060963  | 33127489  | TCP11L1   |
| ENSG00000176153 | 4.942865586 | 3.027231696 | protein_coding | 14 | 65405870  | 65409531  | GPX2      |
| ENSG00000176155 | 9.065572619 | 8.979512278 | protein_coding | 17 | 80059346  | 80170689  | CCDC57    |
| ENSG00000176160 | 0           | 0.697730409 | protein_coding | 17 | 56497529  | 56565759  | HSF5      |
| ENSG00000176170 | 8.924215738 | 9.814826612 | protein_coding | 17 | 74372742  | 74383941  | SPHK1     |
| ENSG00000176171 | 8.472474444 | 9.740202333 | protein_coding | 10 | 133781578 | 133795435 | BNIP3     |
| ENSG00000176182 | 6.62865285  | 6.911866869 | protein_coding | 19 | 46393285  | 46405862  | MYPOP     |
| ENSG00000176183 | 0.499066092 | 1.353254395 | pseudogene     | 5  | 97674448  | 97675536  |           |
| ENSG00000176208 | 7.746012174 | 7.405556541 | protein_coding | 17 | 29158988  | 29222295  | ATAD5     |
| ENSG00000176209 | 6.456028446 | 6.737844962 | protein_coding | 8  | 42396298  | 42408151  | C8orf40   |
| ENSG00000176222 | 4.883502971 | 5.466810074 | protein_coding | 19 | 44376519  | 44384291  | ZNF404    |
| ENSG00000176225 | 7.262161623 | 7.295628905 | protein_coding | 18 | 67671045  | 67872962  | RTTN      |
| ENSG00000176227 | 0.869158192 | 0           | pseudogene     | 7  | 143268819 | 143271478 | CTAGE15P  |
| ENSG00000176236 | 1.407729925 | 1.667587519 | protein_coding | 10 | 15137384  | 15139318  | C10orf111 |
| ENSG00000176244 | 3.871730003 | 3.32456471  | protein_coding | 10 | 15119522  | 15130775  | ACBD7     |
| ENSG00000176248 | 9.614318105 | 9.379087693 | protein_coding | 9  | 140069236 | 140082989 | ANAPC2    |
| ENSG00000176261 | 7.345180517 | 7.507697912 | protein_coding | 1  | 33065773  | 33116504  | ZBTB80S   |
| ENSG00000176268 | 0           | 0.390640832 | pseudogene     | 13 | 41437735  | 41438038  | CYCSP34   |
| ENSG00000176273 | 7.323008624 | 7.616862529 | protein_coding | 10 | 95653730  | 95715819  | SLC35G1   |
| ENSG00000176274 | 4.352265886 | 4.17820932  | protein_coding | X  | 103343898 | 103401708 | MCART6    |
| ENSG00000176289 | 0.499066092 | 0           | pseudogene     | X  | 148606540 | 148607582 | IDSP1     |
| ENSG00000176293 | 7.406211319 | 8.061749803 | protein_coding | 19 | 58570607  | 58597677  | ZNF135    |
| ENSG00000176302 | 0           | 0.697730409 | protein_coding | 11 | 118842417 | 118852001 | FOXR1     |
| ENSG00000176320 | 0.499066092 | 0           | lincRNA        | 1  | 158167712 | 158173667 |           |
| ENSG00000176340 | 9.673929165 | 10.18300738 | protein_coding | 11 | 63742079  | 63744015  | COX8A     |
| ENSG00000176343 | 1.16343121  | 1.802319292 | pseudogene     | 11 | 111759923 | 111760198 | RPL37AP8  |
| ENSG00000176349 | 1.799000381 | 2.912743273 | protein_coding | 7  | 1878222   | 1889567   |           |
| ENSG00000176354 | 3.698846687 | 3.570966319 | pseudogene     | 3  | 37283303  | 37285686  |           |
| ENSG00000176358 | 3.077135474 | 2.788380093 | protein_coding | 17 | 47915671  | 47925379  | TAC4      |
| ENSG00000176371 | 6.35766608  | 6.223059835 | protein_coding | 15 | 85144217  | 85171027  | ZSCAN2    |
| ENSG00000176381 | 0.499066092 | 0.697730409 | protein_coding | 6  | 166719168 | 166721936 | PRR18     |
| ENSG00000176383 | 6.059927234 | 5.871116342 | protein_coding | 12 | 122688090 | 122693499 | B3GNT4    |
| ENSG00000176386 | 6.902274257 | 6.881748114 | protein_coding | 9  | 116018115 | 116037869 | CDC26     |
| ENSG00000176387 | 4.381167248 | 3.183544561 | protein_coding | 16 | 67464555  | 67471456  | HSD11B2   |
| ENSG00000176390 | 7.537174746 | 7.234379288 | protein_coding | 17 | 29109726  | 29151778  | CRLF3     |
| ENSG00000176393 | 10.32489868 | 10.00103046 | protein_coding | 1  | 201951500 | 201975275 | RNPEP     |
| ENSG00000176395 | 1.407729925 | 2.039052734 | lincRNA        | 19 | 45005729  | 45033811  | CEACAM20  |
| ENSG00000176396 | 6.014532757 | 6.327306117 | protein_coding | 19 | 40028890  | 40030870  | EID2      |
| ENSG00000176399 | 3.871730003 | 3.87606762  | protein_coding | 9  | 22446840  | 22452472  | DMRTA1    |
| ENSG00000176401 | 3.830412367 | 4.17820932  | protein_coding | 19 | 40021630  | 40023494  | EID2B     |
| ENSG00000176402 | 0.499066092 | 1.16600992  | protein_coding | 7  | 99520892  | 99527243  | GJC3      |
| ENSG00000176406 | 0.869158192 | 1.16600992  | protein_coding | 8  | 104512976 | 105268322 | RIMS2     |
| ENSG00000176407 | 9.360447332 | 9.510993211 | protein_coding | 2  | 85198216  | 85282560  | KCMF1     |
| ENSG00000176410 | 6.733233509 | 6.795524906 | protein_coding | 7  | 73096601  | 73097783  | DNAJC30   |
| ENSG00000176422 | 7.427149666 | 7.803146634 | protein_coding | 12 | 56862301  | 56864763  | SPRYD4    |
| ENSG00000176428 | 3.211941663 | 2.501982735 | protein_coding | 7  | 73082155  | 73086442  | VPS37D    |
| ENSG00000176438 | 2.847891871 | 0.390640832 | protein_coding | 14 | 95883941  | 95942173  | C14orf49  |
| ENSG00000176444 | 9.14670993  | 9.602710123 | protein_coding | 1  | 155232659 | 155248282 | CLK2      |
| ENSG00000176454 | 9.332049062 | 8.639296529 | protein_coding | 15 | 34651106  | 34659479  | LPCAT4    |
| ENSG00000176463 | 8.278730502 | 8.065104068 | protein_coding | 15 | 92396925  | 92715665  | SLCO3A1   |
| ENSG00000176472 | 3.448790144 | 2.420525079 | protein_coding | 19 | 44029649  | 44040282  | ZNF575    |
| ENSG00000176473 | 7.123655438 | 6.95589788  | protein_coding | 14 | 100842755 | 100996640 | WDR25     |
| ENSG00000176476 | 7.169937448 | 7.632773539 | protein_coding | 16 | 28565236  | 28603111  | CCDC101   |
| ENSG00000176485 | 6.509364082 | 6.246885341 | protein_coding | 11 | 63340667  | 63384355  | PLA2G16   |
| ENSG00000176490 | 8.713115882 | 7.928139131 | protein_coding | 19 | 2714566   | 2721390   | DIRAS1    |
| ENSG00000176531 | 6.798966424 | 5.863430791 | protein_coding | 19 | 43979255  | 44009087  | PHLDB3    |
| ENSG00000176532 | 4.19837882  | 0           | protein_coding | 7  | 29603427  | 29606911  | PRR15     |
| ENSG00000176533 | 7.37062428  | 7.487839978 | protein_coding | 19 | 2511218   | 2702746   | GNG7      |
| ENSG00000176542 | 7.903720218 | 7.381542895 | protein_coding | 3  | 113367232 | 113415493 | KIAA2018  |
| ENSG00000176563 | 3.335220907 | 4.127774132 | protein_coding | 17 | 40950854  | 40963604  | CNTD1     |
| ENSG00000176593 | 7.1740722   | 7.029859489 | protein_coding | 19 | 58513429  | 58522600  |           |
| ENSG00000176595 | 4.19837882  | 5.863430791 | protein_coding | 8  | 1922044   | 1955102   | KBTBD11   |
| ENSG00000176597 | 9.047656547 | 8.637044457 | protein_coding | 3  | 182971032 | 183016292 | B3GNT5    |

|                 |             |             |                |    |           |           |          |
|-----------------|-------------|-------------|----------------|----|-----------|-----------|----------|
| ENSG00000176601 | 0.499066092 | 0           | protein_coding | 2  | 135722061 | 135805038 | YSK4     |
| ENSG00000176619 | 12.60746111 | 12.37085179 | protein_coding | 19 | 2427636   | 2456994   | LMNB2    |
| ENSG00000176623 | 8.197783135 | 8.176294739 | protein_coding | 8  | 87480486  | 87526586  | FAM82B   |
| ENSG00000176624 | 8.994872754 | 8.883984273 | protein_coding | 18 | 48700920  | 48723690  | MEX3C    |
| ENSG00000176635 | 1.960915222 | 1.925536307 | protein_coding | 22 | 30476163  | 30606866  | HORMAD2  |
| ENSG00000176641 | 0           | 0.390640832 | protein_coding | 18 | 59475296  | 59560992  | RNF152   |
| ENSG00000176658 | 7.258272112 | 2.039052734 | protein_coding | 17 | 30819628  | 31203902  | MYO1D    |
| ENSG00000176678 | 5.485736881 | 4.961837817 | protein_coding | 16 | 86612115  | 86615303  | FOXL1    |
| ENSG00000176681 | 2.847891871 | 2.971122874 | protein_coding | 17 | 44370099  | 44415160  | LRRC37A  |
| ENSG00000176692 | 1.799000381 | 1.353254395 | protein_coding | 16 | 86600857  | 86602539  | FOXC2    |
| ENSG00000176697 | 5.977159882 | 5.988823159 | protein_coding | 11 | 27676440  | 27743605  | BDNF     |
| ENSG00000176700 | 6.835971536 | 6.775188634 | pseudogene     | 15 | 85174682  | 85185695  | SCAND2   |
| ENSG00000176714 | 3.603959378 | 3.679994897 | protein_coding | 2  | 27848506  | 27851879  | CCDC121  |
| ENSG00000176715 | 8.674235392 | 8.925174415 | protein_coding | 16 | 89154783  | 89222254  | ACSF3    |
| ENSG00000176716 | 0           | 0.390640832 | protein_coding | 11 | 7749632   | 7750935   | OR10AB1P |
| ENSG00000176720 | 8.977234519 | 9.117563863 | protein_coding | 2  | 242498136 | 242513546 | BOK      |
| ENSG00000176723 | 2.35979773  | 2.242360793 | protein_coding | 16 | 31445569  | 31454346  | ZNF843   |
| ENSG00000176731 | 6.887241849 | 6.642271819 | protein_coding | 8  | 86126311  | 86132650  | C8orf59  |
| ENSG00000176732 | 1.616589159 | 2.039052734 | protein_coding | 2  | 24338241  | 24346347  | PFN4     |
| ENSG00000176746 | 0           | 0.390640832 | protein_coding | X  | 26210557  | 26213763  | MAGEB6   |
| ENSG00000176749 | 5.107569429 | 4.65855978  | protein_coding | 17 | 30813637  | 30818274  | CDK5R1   |
| ENSG00000176753 | 2.671945279 | 2.242360793 | protein_coding | 15 | 40542865  | 40545170  | C15orf56 |
| ENSG00000176761 | 0.869158192 | 1.353254395 | pseudogene     | 19 | 44971858  | 44977444  |          |
| ENSG00000176783 | 8.023133844 | 8.256237404 | protein_coding | 5  | 178977559 | 179037027 | RUFY1    |
| ENSG00000176788 | 12.13946777 | 11.82145555 | protein_coding | 5  | 17217669  | 17276943  | BASP1    |
| ENSG00000176809 | 5.512107582 | 6.365895578 | protein_coding | 17 | 62850430  | 62895219  | LRRC37A3 |
| ENSG00000176824 | 0           | 0.390640832 | pseudogene     | 2  | 145218679 | 145221645 |          |
| ENSG00000176826 | 3.448790144 | 3.133298822 | pseudogene     | 7  | 55748767  | 55780945  | FKBP9L   |
| ENSG00000176834 | 7.757079669 | 6.465715653 | protein_coding | 12 | 118501398 | 118573831 | VSIG10   |
| ENSG00000176840 | 0.499066092 | 0.390640832 | lincRNA        | 19 | 4769117   | 4772545   | MIR7-3HG |
| ENSG00000176842 | 6.393570237 | 6.664555628 | protein_coding | 16 | 54964774  | 54968397  | IRX5     |
| ENSG00000176845 | 8.215945216 | 8.024328814 | protein_coding | 17 | 81037567  | 81052585  | METRNL   |
| ENSG00000176853 | 9.405983977 | 9.355310748 | protein_coding | 8  | 124780696 | 124827692 | FAM91A1  |
| ENSG00000176855 | 2.35979773  | 1.667587519 | pseudogene     | 1  | 182928154 | 182929540 | KRT18P28 |
| ENSG00000176857 | 0.869158192 | 0.390640832 | pseudogene     | 5  | 108387013 | 108388158 |          |
| ENSG00000176871 | 9.819610198 | 9.381107599 | protein_coding | 12 | 118470712 | 118500235 | WSB2     |
| ENSG00000176884 | 6.407685389 | 4.990346085 | protein_coding | 9  | 140032842 | 140063207 | GRIN1    |
| ENSG00000176890 | 9.58666794  | 9.742822827 | protein_coding | 18 | 657604    | 673578    | TYMS     |
| ENSG00000176894 | 4.75690578  | 4.888000647 | protein_coding | 12 | 133264192 | 133297276 | PXMP2    |
| ENSG00000176896 | 3.78787645  | 5.045726316 | protein_coding | X  | 13671225  | 13700083  | TCEANC   |
| ENSG00000176903 | 9.334821842 | 9.516516751 | protein_coding | 14 | 74178494  | 74181128  | PNMA1    |
| ENSG00000176907 | 6.646617938 | 7.050313162 | protein_coding | 8  | 40010989  | 40012821  | C8orf4   |
| ENSG00000176909 | 4.131913373 | 4.794098771 | protein_coding | 19 | 49216255  | 49222978  | MAMSTR   |
| ENSG00000176912 | 3.146112541 | 3.679994897 | protein_coding | 18 | 649621    | 658340    | C18orf56 |
| ENSG00000176915 | 9.644431499 | 9.870045082 | protein_coding | 12 | 133302254 | 133338474 | ANKLE2   |
| ENSG00000176919 | 2.238690726 | 2.788380093 | protein_coding | 9  | 139839698 | 139841426 | C8G      |
| ENSG00000176920 | 5.207774174 | 3.748356452 | protein_coding | 19 | 49199228  | 49209207  | FUT2     |
| ENSG00000176927 | 2.238690726 | 2.579085888 | protein_coding | 17 | 28256218  | 28435470  | EFCAB5   |
| ENSG00000176928 | 3.554067925 | 4.075511708 | protein_coding | 5  | 74323289  | 74326724  | GCNT4    |
| ENSG00000176933 | 1.799000381 | 2.039052734 | pseudogene     | 6  | 28185421  | 28186655  | TOB2P1   |
| ENSG00000176936 | 2.35979773  | 2.652276565 | antisense      | 19 | 1385158   | 1389650   |          |
| ENSG00000176945 | 3.448790144 | 3.453019579 | protein_coding | 3  | 195343316 | 195467994 | MUC20    |
| ENSG00000176946 | 10.08083775 | 9.616492755 | protein_coding | 2  | 242523820 | 242576864 | THAP4    |
| ENSG00000176953 | 9.373990307 | 9.654843329 | protein_coding | 16 | 28962128  | 28978418  | NFATC2IP |
| ENSG00000176956 | 0           | 0.390640832 | protein_coding | 8  | 144239331 | 144242128 | LY6H     |
| ENSG00000176971 | 0           | 0.390640832 | protein_coding | 11 | 27015628  | 27018630  | FIBIN    |
| ENSG00000176973 | 4.842525946 | 5.236305879 | protein_coding | 11 | 65339820  | 65341669  | FAM89B   |
| ENSG00000176974 | 9.548160668 | 9.729143979 | protein_coding | 17 | 18231187  | 18266832  | SHMT1    |
| ENSG00000176978 | 10.34704177 | 10.63742557 | protein_coding | 9  | 140004994 | 140009629 | DPP7     |
| ENSG00000176986 | 10.8899802  | 10.3739526  | protein_coding | 10 | 75504120  | 75531919  | SEC24C   |
| ENSG00000176994 | 8.094677541 | 8.520929986 | protein_coding | 17 | 18218716  | 18226517  | SMCR8    |
| ENSG00000176998 | 2.57521082  | 3.183544561 | pseudogene     | 6  | 29758816  | 29760850  | HCG4     |
| ENSG00000177000 | 6.541724534 | 5.683080141 | protein_coding | 1  | 11845780  | 11866977  | MTHFR    |

|                 |             |             |                  |    |           |                    |
|-----------------|-------------|-------------|------------------|----|-----------|--------------------|
| ENSG00000177025 | 5.124761037 | 5.259915406 | protein_coding   | 19 | 58469807  | 58485904 C19orf18  |
| ENSG00000177030 | 8.513842764 | 8.624594823 | protein_coding   | 11 | 644233    | 706715 DEAF1       |
| ENSG00000177034 | 7.07583934  | 6.750400563 | protein_coding   | 5  | 79275584  | 79287082 MTX3      |
| ENSG00000177042 | 5.806547963 | 6.246885341 | protein_coding   | 11 | 695616    | 705028 TMEM80      |
| ENSG00000177045 | 7.214780754 | 7.743685008 | protein_coding   | 19 | 46268044  | 46272141 SIX5      |
| ENSG00000177051 | 8.309127368 | 8.043160634 | protein_coding   | 19 | 46213887  | 46234151 FBXO46    |
| ENSG00000177054 | 8.13977083  | 8.280968702 | protein_coding   | 11 | 19138646  | 19197969 ZDHHHC13  |
| ENSG00000177058 | 7.110771062 | 7.204272857 | protein_coding   | 5  | 54921673  | 55069022 SLC38A9   |
| ENSG00000177076 | 2.471521042 | 2.039052734 | protein_coding   | 9  | 19408925  | 19452018 ACER2     |
| ENSG00000177082 | 7.834876234 | 8.109639521 | protein_coding   | 15 | 85185999  | 85197574 WDR73     |
| ENSG00000177084 | 10.08688122 | 10.11302738 | protein_coding   | 12 | 133200345 | 133413387 POLE     |
| ENSG00000177096 | 7.206730419 | 6.952279523 | protein_coding   | 22 | 42470255  | 42475445 FAM109B   |
| ENSG00000177098 | 2.471521042 | 3.570966319 | protein_coding   | 11 | 118004092 | 118023603 SCN4B    |
| ENSG00000177103 | 0.499066092 | 0.697730409 | protein_coding   | 11 | 117298489 | 117688240 DSCAML1  |
| ENSG00000177105 | 9.462857538 | 9.454562557 | protein_coding   | 11 | 3848208   | 3862213 RHOG       |
| ENSG00000177106 | 9.702835781 | 8.679244009 | protein_coding   | 11 | 694438    | 727727 EPS8L2      |
| ENSG00000177108 | 0.499066092 | 0           | protein_coding   | 14 | 77597613  | 77609077 ZDHHHC22  |
| ENSG00000177112 | 0.869158192 | 0.697730409 | antisense        | 11 | 10562819  | 10621479 MRV11-AS1 |
| ENSG00000177119 | 10.17203891 | 10.51031183 | protein_coding   | 12 | 45609770  | 45834187 ANO6      |
| ENSG00000177125 | 7.202688343 | 7.070480904 | protein_coding   | 9  | 129622944 | 129648157 ZBTB34   |
| ENSG00000177133 | 2.238690726 | 1.353254395 | processed_transc | 1  | 2976179   | 2985001            |
| ENSG00000177138 | 2.471521042 | 1.925536307 | protein_coding X |    | 8992273   | 9132680 FAM9B      |
| ENSG00000177144 | 0           | 0.390640832 | pseudogene       | 1  | 145139025 | 145139569          |
| ENSG00000177150 | 8.526833966 | 8.739266022 | protein_coding   | 18 | 13663346  | 13726591 FAM210A   |
| ENSG00000177156 | 10.36975169 | 10.22559683 | protein_coding   | 11 | 747329    | 765024 TALDO1      |
| ENSG00000177169 | 10.29198498 | 10.2534295  | protein_coding   | 12 | 132379196 | 132407695 ULK1     |
| ENSG00000177173 | 2.671945279 | 2.420525079 | pseudogene       | 1  | 117075558 | 117076714 NAP1L4P1 |
| ENSG00000177182 | 0.499066092 | 0           | protein_coding   | 8  | 61969717  | 62414204 CLVS1     |
| ENSG00000177189 | 10.714799   | 10.41297634 | protein_coding X |    | 20168029  | 20285523 RPS6KA3   |
| ENSG00000177191 | 2.10647801  | 1.925536307 | protein_coding   | 19 | 41931265  | 41934635 B3GNT8    |
| ENSG00000177192 | 9.287898339 | 8.832754911 | protein_coding   | 12 | 132413745 | 132428406 PUS1     |
| ENSG00000177197 | 0.499066092 | 0.390640832 | pseudogene       | 13 | 48902220  | 48902700 PCNPP5    |
| ENSG00000177200 | 8.768856552 | 9.356680039 | protein_coding   | 16 | 53088945  | 53363062 CHD9      |
| ENSG00000177202 | 0.499066092 | 0           | protein_coding   | 19 | 49110000  | 49110970 SPACA4    |
| ENSG00000177212 | 0           | 1.16600992  | protein_coding   | 1  | 248436073 | 248437138 OR2T33   |
| ENSG00000177225 | 8.861502869 | 9.049765501 | protein_coding   | 11 | 767220    | 777501 PDDC1       |
| ENSG00000177236 | 4.322773689 | 4.841813558 | pseudogene       | 11 | 780117    | 780755             |
| ENSG00000177238 | 0.499066092 | 0           | protein_coding   | 16 | 31225342  | 31236510 TRIM72    |
| ENSG00000177239 | 10.65429932 | 10.95652219 | protein_coding   | 9  | 139981379 | 140003635 MAN1B1   |
| ENSG00000177261 | 0.499066092 | 0           | pseudogene       | 2  | 215562451 | 215562788 ENSAP3   |
| ENSG00000177272 | 0           | 0.950786998 | protein_coding   | 1  | 111214310 | 111217655 KCNA3    |
| ENSG00000177283 | 3.830412367 | 3.608232228 | protein_coding   | 10 | 35927177  | 35930362 FZD8      |
| ENSG00000177291 | 0           | 0.697730409 | protein_coding   | 10 | 35894338  | 35897863 GJD4      |
| ENSG00000177294 | 2.57521082  | 3.453019579 | protein_coding   | 17 | 6679551   | 6690965 FBXO39     |
| ENSG00000177302 | 9.571858303 | 9.989160763 | protein_coding   | 17 | 18174742  | 18218288 TOP3A     |
| ENSG00000177303 | 8.016241092 | 7.472765069 | protein_coding   | 17 | 73496343  | 73511627 CASKIN2   |
| ENSG00000177311 | 9.584339659 | 9.894290904 | protein_coding   | 3  | 141043055 | 141168634 ZBTB38   |
| ENSG00000177335 | 0.499066092 | 3.081239798 | protein_coding   | 8  | 144120626 | 144141359 C8orf31  |
| ENSG00000177337 | 6.041940478 | 6.520498852 | protein_coding   | 18 | 3594112   | 3598350            |
| ENSG00000177340 | 2.35979773  | 2.144285137 | protein_coding   | 12 | 31477250  | 31478879           |
| ENSG00000177350 | 2.471521042 | 3.027231696 | pseudogene       | 14 | 56232895  | 56234435 RPL13AP3  |
| ENSG00000177352 | 7.413224588 | 7.439552137 | protein_coding   | 3  | 49199968  | 49203754 CCDC71    |
| ENSG00000177359 | 3.274897671 | 3.027231696 | pseudogene       | 12 | 31264586  | 31359088           |
| ENSG00000177363 | 1.799000381 | 2.788380093 | protein_coding   | 11 | 62453874  | 62457371 LRRN4CL   |
| ENSG00000177370 | 8.560389515 | 9.241329169 | protein_coding   | 17 | 900357    | 905388 TIMM22      |
| ENSG00000177374 | 6.917151646 | 6.941369681 | protein_coding   | 17 | 1958393   | 1962980 HIC1       |
| ENSG00000177380 | 8.074911866 | 7.164171052 | protein_coding   | 19 | 49622663  | 49654278 PPFIA3    |
| ENSG00000177383 | 8.357195795 | 8.49131535  | protein_coding   | 3  | 184428156 | 184429836 MAGEF1   |
| ENSG00000177398 | 1.799000381 | 1.667587519 | protein_coding   | 21 | 43483068  | 43563105 UMODL1    |
| ENSG00000177406 | 4.352265886 | 4.342020395 | antisense        | 12 | 740057    | 772872             |
| ENSG00000177409 | 7.374222747 | 7.994732806 | protein_coding   | 7  | 92759368  | 92777682 SAMD9L    |
| ENSG00000177410 | 9.786910053 | 10.05853621 | processed_transc | 20 | 47894715  | 47905797 ZNF1-AS1  |
| ENSG00000177418 | 0.499066092 | 0.390640832 | pseudogene       | 7  | 66021832  | 66022349           |



|                 |             |             |                |    |           |                    |
|-----------------|-------------|-------------|----------------|----|-----------|--------------------|
| ENSG00000177425 | 9.51676008  | 9.404466559 | protein_coding | 12 | 79968759  | 80084877 PAWR      |
| ENSG00000177426 | 9.064459359 | 8.990138507 | protein_coding | 18 | 3411606   | 3459976 TGIF1      |
| ENSG00000177427 | 7.67484765  | 8.231074746 | protein_coding | 17 | 18163869  | 18169095 SMCR7     |
| ENSG00000177432 | 4.903563137 | 3.87606762  | protein_coding | 4  | 89617066  | 89619386 NAP1L5    |
| ENSG00000177452 | 1.960915222 | 0.950786998 | pseudogene     | 1  | 64254392  | 64254975           |
| ENSG00000177453 | 5.175139844 | 5.393992    | protein_coding | 5  | 43192173  | 43280952           |
| ENSG00000177455 | 4.062237333 | 4.226940739 | protein_coding | 16 | 28943260  | 28950667 CD19      |
| ENSG00000177459 | 1.616589159 | 1.667587519 | protein_coding | 8  | 99076539  | 99105838 C8orf47   |
| ENSG00000177462 | 0           | 1.16600992  | protein_coding | 1  | 248084320 | 248085258 OR2T8    |
| ENSG00000177463 | 7.110771062 | 6.97385478  | protein_coding | 3  | 14989091  | 15095107 NR2C2     |
| ENSG00000177464 | 0.499066092 | 0.390640832 | protein_coding | 19 | 46093025  | 46105466 GPR4      |
| ENSG00000177465 | 5.986594255 | 5.66550919  | protein_coding | 14 | 74058410  | 74063200 ACOT4     |
| ENSG00000177469 | 12.21088618 | 11.83133857 | protein_coding | 17 | 40554468  | 40575338 PTRF      |
| ENSG00000177479 | 9.601327095 | 9.400488931 | protein_coding | 3  | 48956254  | 49023815 ARIH2     |
| ENSG00000177483 | 2.928422289 | 2.851901313 | protein_coding | 2  | 238707032 | 238751451 RBM44    |
| ENSG00000177485 | 9.016909338 | 9.209096633 | protein_coding | X  | 119384607 | 119392253 ZBTB33   |
| ENSG00000177508 | 7.269909329 | 7.848622884 | protein_coding | 16 | 54317216  | 54320675 IRX3      |
| ENSG00000177542 | 9.757590402 | 9.713197829 | protein_coding | 11 | 790475    | 798316 SLC25A22    |
| ENSG00000177548 | 7.63640659  | 8.458531597 | protein_coding | 16 | 28915742  | 28947847 RABEP2    |
| ENSG00000177556 | 8.591637531 | 9.090661058 | protein_coding | 5  | 151121877 | 151152093 ATOX1    |
| ENSG00000177565 | 10.52995925 | 9.999278141 | protein_coding | 3  | 176737143 | 176915261 TBL1XR1  |
| ENSG00000177570 | 3.274897671 | 3.279072565 | protein_coding | 8  | 119201698 | 119634234 SAMD12   |
| ENSG00000177575 | 1.16343121  | 0.697730409 | protein_coding | 12 | 7623409   | 7656489 CD163      |
| ENSG00000177576 | 6.804311337 | 7.628245414 | protein_coding | 18 | 47008030  | 47013601 C18orf32  |
| ENSG00000177595 | 8.048129203 | 7.772696723 | protein_coding | 11 | 799180    | 809753 PIDD        |
| ENSG00000177599 | 4.19837882  | 4.508954154 | protein_coding | 19 | 11908482  | 11920437 ZNF491    |
| ENSG00000177600 | 12.29028863 | 12.3421068  | protein_coding | 11 | 809647    | 812880 RPLP2       |
| ENSG00000177602 | 8.327805238 | 8.614328238 | protein_coding | 17 | 3627211   | 3630067 GSG2       |
| ENSG00000177606 | 11.15921124 | 10.09262819 | protein_coding | 1  | 59246465  | 59249785 JUN       |
| ENSG00000177613 | 8.528449672 | 8.270836518 | protein_coding | 10 | 53455247  | 53459355 CSTF2T    |
| ENSG00000177614 | 3.603959378 | 5.175534283 | protein_coding | 1  | 230457392 | 230561475 PGBD5    |
| ENSG00000177627 | 1.960915222 | 2.334191469 | protein_coding | 12 | 48876286  | 48890295 C12orf54  |
| ENSG00000177628 | 9.568721018 | 10.35557934 | protein_coding | 1  | 155204239 | 155214653 GBA      |
| ENSG00000177640 | 4.689181911 | 4.202780776 | non_coding     | 10 | 119805790 | 119969663 CASC2    |
| ENSG00000177646 | 8.282565319 | 8.338926518 | protein_coding | 3  | 128598439 | 128634910 ACAD9    |
| ENSG00000177663 | 7.845284967 | 7.827052132 | protein_coding | 22 | 17565844  | 17596583 IL17RA    |
| ENSG00000177666 | 9.269659458 | 9.333918856 | protein_coding | 11 | 818902    | 825573 PNPLA2      |
| ENSG00000177669 | 1.616589159 | 1.16600992  | protein_coding | 8  | 29989340  | 30002202 MBOAT4    |
| ENSG00000177674 | 8.631273684 | 8.743459249 | protein_coding | 1  | 11796141  | 11814859 AGTRAP    |
| ENSG00000177675 | 6.592037289 | 7.462626902 | protein_coding | 12 | 7499281   | 7632493 CD163L1    |
| ENSG00000177679 | 4.689181911 | 3.081239798 | protein_coding | 7  | 75831216  | 75916605 SRRM3     |
| ENSG00000177683 | 7.847875458 | 7.487839978 | protein_coding | 7  | 108194987 | 108210194 THAP5    |
| ENSG00000177685 | 5.525114348 | 4.841813558 | protein_coding | 11 | 826144    | 831991 EFCAB4A     |
| ENSG00000177688 | 0.499066092 | 0.390640832 | protein_coding | 6  | 149721495 | 149722177 SUMO4    |
| ENSG00000177692 | 3.077135474 | 4.101879561 | protein_coding | 21 | 34860497  | 34864027 DNAJC28   |
| ENSG00000177694 | 2.10647801  | 0.697730409 | protein_coding | 3  | 174156363 | 175523428 NAALADL2 |
| ENSG00000177697 | 11.11634334 | 11.26546849 | protein_coding | 11 | 832843    | 839831 CD151       |
| ENSG00000177699 | 0.869158192 | 0.390640832 | antisense      | 15 | 79271231  | 79278268           |
| ENSG00000177700 | 8.779750834 | 9.351881826 | protein_coding | 11 | 837356    | 842545 POLR2L      |
| ENSG00000177706 | 10.48615002 | 9.326251289 | protein_coding | 7  | 192969    | 300711 FAM20C      |
| ENSG00000177707 | 6.592037289 | 7.605389119 | protein_coding | 3  | 110788918 | 110994410 PVRL3    |
| ENSG00000177710 | 0.869158192 | 0.697730409 | protein_coding | 8  | 11188397  | 11189717 SLC35G5   |
| ENSG00000177721 | 5.141750194 | 5.200150955 | protein_coding | 5  | 43039335  | 43043272 C5orf39   |
| ENSG00000177725 | 0.499066092 | 2.242360793 | pseudogene     | 8  | 22026851  | 22029223           |
| ENSG00000177728 | 9.5183871   | 9.464122284 | protein_coding | 17 | 73452664  | 73496530 KIAA0195  |
| ENSG00000177731 | 12.27749479 | 12.66458408 | protein_coding | 17 | 18148150  | 18162056 FLII      |
| ENSG00000177732 | 10.24214716 | 9.802319276 | protein_coding | 20 | 306207    | 310865 SOX12       |
| ENSG00000177733 | 11.04645645 | 11.04305224 | protein_coding | 5  | 137087075 | 137090039 HNRNPA0  |
| ENSG00000177736 | 0.499066092 | 0           | pseudogene     | 9  | 127730576 | 127731223          |
| ENSG00000177738 | 6.335686705 | 6.002883551 | lincRNA        | 5  | 43014516  | 43067521           |
| ENSG00000177757 | 1.16343121  | 0.950786998 | lincRNA        | 1  | 752751    | 755214 FAM87B      |
| ENSG00000177764 | 4.999881834 | 4.976162367 | protein_coding | 20 | 277737    | 280965 ZCCHC3      |
| ENSG00000177776 | 0           | 0.390640832 | pseudogene     | 14 | 74844521  | 74845121 RPS2P2    |

|                 |             |             |                  |    |           |                    |
|-----------------|-------------|-------------|------------------|----|-----------|--------------------|
| ENSG00000177788 | 3.554067925 | 4.075511708 | processed_transc | 1  | 229394028 | 229406775          |
| ENSG00000177791 | 0.499066092 | 0.697730409 | protein_coding   | 10 | 75391412  | 75401515 MYOZ1     |
| ENSG00000177800 | 0           | 0.697730409 | protein_coding   | 1  | 229385383 | 229387557 TMEM78   |
| ENSG00000177803 | 0.869158192 | 0.390640832 | pseudogene       | 4  | 164853678 | 164854334          |
| ENSG00000177807 | 0.869158192 | 0.390640832 | protein_coding   | 1  | 160007257 | 160040038 KCNJ10   |
| ENSG00000177822 | 0           | 1.16600992  | processed_transc | 4  | 182795591 | 183066402          |
| ENSG00000177830 | 10.00916559 | 9.881981209 | protein_coding   | 11 | 867357    | 915058 CHID1       |
| ENSG00000177839 | 5.360713447 | 5.840125386 | pseudogene       | 5  | 140566893 | 140571111 PCDHB9   |
| ENSG00000177842 | 2.471521042 | 2.851901313 | protein_coding   | 3  | 40547483  | 40560227 ZNF620    |
| ENSG00000177853 | 7.743231983 | 8.001751392 | processed_transc | 10 | 97889472  | 97965044 ZNF518A   |
| ENSG00000177854 | 7.524276744 | 7.307006333 | protein_coding X |    | 153237778 | 153248646 TMEM187  |
| ENSG00000177855 | 1.16343121  | 1.16600992  | pseudogene       | 2  | 184472170 | 184472847          |
| ENSG00000177868 | 5.072559152 | 5.555337277 | protein_coding   | 1  | 43272723  | 43282954 CCDC23    |
| ENSG00000177873 | 4.026095388 | 4.406904905 | protein_coding   | 3  | 40518604  | 40531727 ZNF619    |
| ENSG00000177879 | 10.80354643 | 9.486185012 | protein_coding   | 5  | 115177178 | 115249778 AP3S1    |
| ENSG00000177885 | 9.812996626 | 9.439780161 | protein_coding   | 17 | 73314157  | 73401790 GRB2      |
| ENSG00000177888 | 5.613019223 | 5.824376633 | protein_coding   | 1  | 197127572 | 197169672 ZBTB41   |
| ENSG00000177889 | 9.370391259 | 9.442361917 | protein_coding   | 12 | 93799449  | 93836038 UBE2N     |
| ENSG00000177910 | 0           | 0.390640832 | pseudogene       | 9  | 90744220  | 90749900 FAM75C2   |
| ENSG00000177917 | 8.074911866 | 7.883239271 | protein_coding   | 2  | 153574407 | 153617688 ARL6IP6  |
| ENSG00000177932 | 6.86695184  | 7.073814954 | protein_coding   | 5  | 178487416 | 178510538 ZNF354C  |
| ENSG00000177943 | 6.897280837 | 7.080460027 | protein_coding   | 9  | 139745395 | 139755249 MAMDC4   |
| ENSG00000177946 | 6.204385613 | 5.742946029 | protein_coding   | 16 | 90036206  | 90038942 CENPBD1   |
| ENSG00000177947 | 0.869158192 | 1.16600992  | protein_coding   | 11 | 196738    | 200261 ODF3        |
| ENSG00000177951 | 8.340737341 | 8.381252713 | protein_coding   | 11 | 167784    | 207428 BET1L       |
| ENSG00000177954 | 9.286944125 | 10.01280331 | protein_coding   | 1  | 153963235 | 153964626 RPS27    |
| ENSG00000177963 | 10.24657122 | 10.45832528 | protein_coding   | 11 | 207511    | 215113 RIC8A       |
| ENSG00000177971 | 8.635777795 | 9.386480232 | protein_coding   | 15 | 75931426  | 75941047 IMP3      |
| ENSG00000177981 | 7.153278907 | 7.126137778 | protein_coding   | 12 | 48541571  | 48574996 ASB8      |
| ENSG00000177984 | 0           | 0.390640832 | protein_coding   | 9  | 139654086 | 139660707 LCN15    |
| ENSG00000177989 | 6.400645076 | 7.287036562 | protein_coding   | 22 | 50968139  | 50971009 ODF3B     |
| ENSG00000177990 | 4.261916566 | 3.081239798 | protein_coding   | 12 | 63952693  | 64062719 DPY19L2   |
| ENSG00000177993 | 1.407729925 | 2.501982735 | processed_transc | 22 | 29420987  | 29427464 ZNRF3-AS1 |
| ENSG00000178026 | 4.999881834 | 3.935919592 | protein_coding   | 22 | 24981588  | 24989175 FAM211B   |
| ENSG00000178028 | 7.254372086 | 7.69255166  | protein_coding   | 1  | 44679127  | 44686353 DMAP1     |
| ENSG00000178031 | 1.16343121  | 0.390640832 | protein_coding   | 9  | 18473892  | 18910948 ADAMTSL1  |
| ENSG00000178033 | 1.407729925 | 3.532712221 | protein_coding   | 6  | 116832809 | 116845955 FAM26E   |
| ENSG00000178035 | 11.54352216 | 11.47871408 | protein_coding   | 3  | 49061672  | 49066841 IMPDH2    |
| ENSG00000178038 | 9.110492049 | 8.947155755 | protein_coding   | 3  | 46710487  | 46735194 ALS2CL    |
| ENSG00000178053 | 7.136425764 | 7.711939664 | protein_coding   | 3  | 158288952 | 158325041 MLF1     |
| ENSG00000178055 | 0           | 0.390640832 | protein_coding   | 3  | 46871032  | 46875585 PRSS42    |
| ENSG00000178057 | 8.239811039 | 8.44700755  | protein_coding   | 3  | 49057892  | 49060905 NDUFAF3   |
| ENSG00000178074 | 7.498129565 | 7.289906366 | protein_coding   | 2  | 200775979 | 200820658 C2orf69  |
| ENSG00000178075 | 4.981125677 | 5.393992    | protein_coding   | 3  | 113547029 | 113666021 GRAMD1C  |
| ENSG00000178078 | 8.510576602 | 8.848412964 | protein_coding   | 19 | 4324041   | 4338847 STAP2      |
| ENSG00000178081 | 1.16343121  | 0.950786998 | pseudogene       | 15 | 30395923  | 30423960 ULK4P3    |
| ENSG00000178082 | 1.16343121  | 0.950786998 | pseudogene       | 17 | 27530441  | 27531492           |
| ENSG00000178093 | 5.718698586 | 6.104183162 | protein_coding   | 19 | 19623230  | 19626838 TSSK6     |
| ENSG00000178096 | 7.345180517 | 7.929979971 | protein_coding   | 1  | 149858486 | 149872351 BOLA1    |
| ENSG00000178104 | 9.560847829 | 10.22372209 | protein_coding   | 1  | 144836157 | 145076186 PDE4DIP  |
| ENSG00000178105 | 9.072234198 | 9.09886653  | protein_coding   | 11 | 108535752 | 108811657 DDX10    |
| ENSG00000178110 | 0           | 0.390640832 | protein_coding   | 3  | 156544096 | 156763918 LEKR1    |
| ENSG00000178115 | 0           | 0.390640832 | protein_coding   | 15 | 30844183  | 30854704           |
| ENSG00000178125 | 0           | 0.697730409 | protein_coding   | 8  | 67876334  | 67968839 PPP1R42   |
| ENSG00000178127 | 9.139327269 | 9.270679862 | protein_coding   | 18 | 9102628   | 9134343 NDUFV2     |
| ENSG00000178149 | 7.575190993 | 7.454976247 | protein_coding   | 3  | 49052921  | 49059726 DALRD3    |
| ENSG00000178150 | 7.692250012 | 7.237355663 | protein_coding   | 19 | 48774654  | 48790863 ZNF114    |
| ENSG00000178162 | 0.499066092 | 0           | pseudogene       | 2  | 131174328 | 131188936          |
| ENSG00000178163 | 7.478203418 | 4.976162367 | protein_coding   | 4  | 10441498  | 10459034 ZNF518B   |
| ENSG00000178171 | 0.869158192 | 0           | protein_coding   | 2  | 131513008 | 131525707 FAM123C  |
| ENSG00000178177 | 6.428602508 | 6.470782801 | protein_coding   | 4  | 17844839  | 18023499 LCORL     |
| ENSG00000178184 | 5.207774174 | 5.085909553 | protein_coding   | 18 | 77915115  | 78005429 PARD6G    |
| ENSG00000178187 | 3.950976309 | 4.127774132 | protein_coding   | 5  | 178368192 | 178393434 ZNF454   |

|                 |             |             |                  |    |           |           |          |
|-----------------|-------------|-------------|------------------|----|-----------|-----------|----------|
| ENSG00000178188 | 8.614637248 | 8.91219558  | protein_coding   | 16 | 28857921  | 28885526  | SH2B1    |
| ENSG00000178199 | 3.004694206 | 2.420525079 | protein_coding   | 6  | 149768794 | 149806197 | ZC3H12D  |
| ENSG00000178201 | 3.211941663 | 3.845183986 | protein_coding   | 19 | 57966542  | 57967854  | VN1R1    |
| ENSG00000178202 | 8.398422578 | 8.280968702 | protein_coding   | 11 | 108342832 | 108369159 | KDELC2   |
| ENSG00000178209 | 13.42631403 | 12.82682452 | protein_coding   | 8  | 144989321 | 145050902 | PLEC     |
| ENSG00000178217 | 0.869158192 | 1.16600992  | protein_coding   | 10 | 82297658  | 82406316  | SH2D4B   |
| ENSG00000178222 | 7.908691438 | 7.281279771 | protein_coding   | 4  | 1050038   | 1107350   | RNF212   |
| ENSG00000178226 | 2.928422289 | 3.813624741 | protein_coding   | 16 | 31150246  | 31161415  | PRSS36   |
| ENSG00000178229 | 6.676071387 | 6.563824016 | protein_coding   | 19 | 57831865  | 57842144  | ZNF543   |
| ENSG00000178233 | 3.78787645  | 4.363974406 | protein_coding   | 6  | 44238203  | 44346694  | TMEM151B |
| ENSG00000178234 | 8.911889356 | 8.911264037 | protein_coding   | 7  | 151722759 | 151819425 | GALNT11  |
| ENSG00000178235 | 0.499066092 | 0           | protein_coding   | 13 | 84451344  | 84456528  | SLITRK1  |
| ENSG00000178252 | 10.52146546 | 10.60207072 | protein_coding   | 3  | 49044495  | 49053386  | WDR6     |
| ENSG00000178287 | 0           | 0.390640832 | protein_coding   | 8  | 7705398   | 7726389   | SPAG11A  |
| ENSG00000178295 | 8.150302734 | 8.005247922 | protein_coding   | 2  | 17935125  | 17966632  | GEN1     |
| ENSG00000178297 | 6.522395495 | 6.633261019 | protein_coding   | 19 | 2389769   | 2426086   | TMPRSS9  |
| ENSG00000178301 | 4.491309013 | 4.94736961  | protein_coding   | 11 | 77300436  | 77321400  | AQP11    |
| ENSG00000178307 | 8.247679379 | 8.812940295 | protein_coding   | 17 | 21101263  | 21117908  | TMEM11   |
| ENSG00000178338 | 6.456028446 | 6.338437404 | protein_coding   | 5  | 178286954 | 178315123 | ZNF354B  |
| ENSG00000178342 | 0           | 1.353254395 | protein_coding   | 18 | 77623668  | 77659816  | KCNG2    |
| ENSG00000178343 | 1.407729925 | 0           | protein_coding   | 4  | 42399856  | 42404504  | SHISA3   |
| ENSG00000178381 | 7.234712227 | 7.362585296 | protein_coding   | 7  | 1191707   | 1200395   | ZFAND2A  |
| ENSG00000178385 | 5.175139844 | 4.676215056 | protein_coding   | 2  | 208693027 | 208890284 | PLEKHM3  |
| ENSG00000178386 | 5.795854912 | 5.938503778 | protein_coding   | 19 | 44556164  | 44572142  | ZNF223   |
| ENSG00000178395 | 1.407729925 | 0.697730409 | protein_coding   | 1  | 223566715 | 223568812 | C1orf65  |
| ENSG00000178397 | 8.173205795 | 8.133800013 | protein_coding   | 7  | 6369040   | 6388612   | C7orf70  |
| ENSG00000178401 | 6.372135143 | 5.35066967  | protein_coding   | 12 | 49740700  | 49751309  | DNAJC22  |
| ENSG00000178403 | 0.499066092 | 0           | protein_coding   | 4  | 113434672 | 113437328 | NEUROG2  |
| ENSG00000178404 | 0.499066092 | 1.518964905 | protein_coding   | 17 | 76866992  | 76899297  |          |
| ENSG00000178409 | 7.621344476 | 7.04352744  | protein_coding   | 6  | 107386386 | 107436473 | BEND3    |
| ENSG00000178412 | 0.499066092 | 0.950786998 | protein_coding   | 18 | 77398938  | 77439745  |          |
| ENSG00000178425 | 7.461385447 | 7.32390599  | protein_coding   | 6  | 116421999 | 116566855 | NT5DC1   |
| ENSG00000178429 | 1.799000381 | 1.925536307 | pseudogene       | 10 | 86320199  | 86321019  | RPS3AP5  |
| ENSG00000178430 | 3.830412367 | 2.851901313 | pseudogene       | 16 | 3725411   | 3727060   |          |
| ENSG00000178440 | 2.238690726 | 1.353254395 | processed_transc | 10 | 51732523  | 51741805  |          |
| ENSG00000178445 | 1.407729925 | 0.697730409 | protein_coding   | 9  | 6532464   | 6645650   | GLDC     |
| ENSG00000178449 | 7.153278907 | 7.960920138 | protein_coding   | 12 | 50505762  | 50559203  | C12orf62 |
| ENSG00000178458 | 0.499066092 | 0           | pseudogene       | 4  | 140619298 | 140619708 | H3F3AP6  |
| ENSG00000178460 | 3.448790144 | 3.411459265 | protein_coding   | 8  | 67782984  | 67834283  | C8orf45  |
| ENSG00000178462 | 4.292665995 | 3.027231696 | protein_coding   | 10 | 5435061   | 5446793   | TUBAL3   |
| ENSG00000178464 | 4.593635215 | 4.585695337 | pseudogene       | 19 | 12754089  | 12754733  |          |
| ENSG00000178467 | 7.983632192 | 7.714077892 | protein_coding   | 3  | 49027319  | 49044587  | P4HTM    |
| ENSG00000178498 | 7.434062125 | 7.060432274 | protein_coding   | 12 | 57998405  | 58003587  | DTX3     |
| ENSG00000178502 | 5.346128795 | 5.691786012 | protein_coding   | 17 | 40009797  | 40021684  | KLHL11   |
| ENSG00000178531 | 7.89873181  | 8.683615101 | protein_coding   | 19 | 7989382   | 7991051   | CTXN1    |
| ENSG00000178537 | 6.652556929 | 6.847095496 | protein_coding   | 3  | 48894369  | 48936426  | SLC25A20 |
| ENSG00000178556 | 0           | 0.390640832 | pseudogene       | X  | 30635571  | 30635810  | CKS1BP6  |
| ENSG00000178562 | 0           | 0.390640832 | protein_coding   | 2  | 204571198 | 204602557 | CD28     |
| ENSG00000178567 | 7.165790811 | 7.852510423 | protein_coding   | 3  | 37027357  | 37034795  | EPM2AIP1 |
| ENSG00000178568 | 0           | 0.390640832 | protein_coding   | 2  | 212240446 | 213403565 | ERBB4    |
| ENSG00000178573 | 0.499066092 | 3.748356452 | protein_coding   | 16 | 79619740  | 79634611  | MAF      |
| ENSG00000178585 | 7.746012174 | 6.754561598 | protein_coding   | 1  | 9908334   | 9970394   | CTNNBIP1 |
| ENSG00000178597 | 1.799000381 | 1.925536307 | protein_coding   | 4  | 7432022   | 7436700   | PSAPL1   |
| ENSG00000178605 | 8.650690744 | 9.065760854 | protein_coding   | X  | 220013    | 230886    | GTPBP6   |
| ENSG00000178607 | 6.979904289 | 6.668971382 | protein_coding   | 17 | 62120390  | 62207502  | ERN1     |
| ENSG00000178623 | 4.491309013 | 4.794098771 | protein_coding   | 2  | 241544848 | 241570676 | GPR35    |
| ENSG00000178631 | 1.799000381 | 2.242360793 | pseudogene       | 3  | 139212651 | 139213779 | ACTG1P1  |
| ENSG00000178636 | 0.869158192 | 1.16600992  | protein_coding   | 4  | 120113928 | 120133799 |          |
| ENSG00000178642 | 2.471521042 | 2.420525079 | pseudogene       | 1  | 2316811   | 2319922   |          |
| ENSG00000178654 | 2.238690726 | 0.950786998 | pseudogene       | 9  | 7597823   | 7598371   |          |
| ENSG00000178660 | 0           | 0.390640832 | pseudogene       | 3  | 94225610  | 94226464  | ARMC10P1 |
| ENSG00000178665 | 4.923348194 | 4.794098771 | protein_coding   | 7  | 55955169  | 56009918  | ZNF713   |
| ENSG00000178685 | 9.194306789 | 9.66482659  | protein_coding   | 8  | 145051321 | 145086940 | PARP10   |

|                 |             |             |                  |    |           |           |           |
|-----------------|-------------|-------------|------------------|----|-----------|-----------|-----------|
| ENSG00000178690 | 0           | 0.390640832 | protein_coding   | 18 | 52258390  | 52266724  | C18orf26  |
| ENSG00000178691 | 9.43986141  | 9.296594447 | protein_coding   | 17 | 30264056  | 30328064  | SUZ12     |
| ENSG00000178694 | 6.462804234 | 6.803579823 | protein_coding   | 3  | 93781760  | 93847389  | NSUN3     |
| ENSG00000178695 | 9.304024157 | 8.729786462 | protein_coding   | 13 | 77454312  | 77460540  | KCTD12    |
| ENSG00000178700 | 5.806547963 | 6.235021771 | protein_coding   | 3  | 93766680  | 93782233  | DHFR1L    |
| ENSG00000178715 | 5.929039784 | 6.387491945 | pseudogene       | 1  | 16154724  | 16155167  |           |
| ENSG00000178718 | 8.977234519 | 8.874456566 | protein_coding   | 15 | 75246757  | 75249805  | RPP25     |
| ENSG00000178719 | 10.46816273 | 10.70321774 | protein_coding   | 8  | 145064226 | 145067583 | GRINA     |
| ENSG00000178723 | 0           | 0.390640832 | pseudogene       | 9  | 34917172  | 34918287  | GLULP4    |
| ENSG00000178726 | 4.437288965 | 4.622587519 | protein_coding   | 20 | 23026270  | 23030378  | THBD      |
| ENSG00000178732 | 0.499066092 | 0.697730409 | protein_coding   | 3  | 194115550 | 194119995 | GP5       |
| ENSG00000178741 | 9.832747078 | 9.844409099 | protein_coding   | 15 | 75212132  | 75230509  | COX5A     |
| ENSG00000178750 | 0.499066092 | 1.16600992  | protein_coding   | 3  | 93733213  | 93747454  | STX19     |
| ENSG00000178752 | 3.393122761 | 3.232099092 | protein_coding   | 2  | 239067623 | 239077541 | FAM132B   |
| ENSG00000178761 | 7.581430769 | 8.075120324 | protein_coding   | 15 | 75192328  | 75199462  | C15orf17  |
| ENSG00000178764 | 8.375265417 | 8.543951256 | protein_coding   | 8  | 123793633 | 123986750 | ZHX2      |
| ENSG00000178772 | 0           | 0.390640832 | protein_coding   | 3  | 194060494 | 194072057 | CPN2      |
| ENSG00000178773 | 9.550548025 | 9.767740319 | protein_coding   | 16 | 89642176  | 89663654  | CPNE7     |
| ENSG00000178776 | 0           | 5.871116342 | protein_coding   | 5  | 147260289 | 147286101 | C5orf46   |
| ENSG00000178795 | 0.499066092 | 0           | protein_coding   | 11 | 76927603  | 77012732  | GDPD4     |
| ENSG00000178796 | 0.869158192 | 0.390640832 | protein_coding   | 1  | 151682909 | 151702281 | RIIAD1    |
| ENSG00000178802 | 8.898207576 | 8.979512278 | protein_coding   | 15 | 75182346  | 75191798  | MPI       |
| ENSG00000178803 | 4.292665995 | 4.021284656 | protein_coding   | 22 | 24825178  | 24891042  | C22orf45  |
| ENSG00000178809 | 5.986594255 | 5.361622823 | protein_coding   | 7  | 75024337  | 75040279  | TRIM73    |
| ENSG00000178814 | 8.666918882 | 9.213637661 | processed_transc | 8  | 145106167 | 145118735 | OPLAH     |
| ENSG00000178821 | 5.072559152 | 4.693656882 | protein_coding   | 1  | 1849029   | 1850712   | TMEM52    |
| ENSG00000178826 | 1.616589159 | 1.925536307 | protein_coding   | 7  | 142977050 | 142985141 | TMEM139   |
| ENSG00000178852 | 4.352265886 | 4.94736961  | protein_coding   | 17 | 45400656  | 45518678  | C17orf57  |
| ENSG00000178860 | 3.146112541 | 3.081239798 | protein_coding   | 8  | 72753784  | 72756703  | MSC       |
| ENSG00000178863 | 3.004694206 | 3.493416095 | pseudogene       | 19 | 33793976  | 33795656  |           |
| ENSG00000178878 | 6.212449006 | 6.210997888 | protein_coding   | 12 | 12878865  | 12944400  | APOLD1    |
| ENSG00000178882 | 3.393122761 | 2.579085888 | protein_coding   | 12 | 124773710 | 124800570 | FAM101A   |
| ENSG00000178896 | 7.311793575 | 7.754113435 | protein_coding   | 8  | 145133529 | 145135550 | EXOSC4    |
| ENSG00000178904 | 6.882196036 | 7.487839978 | protein_coding   | 19 | 32896655  | 32976795  | DPY19L3   |
| ENSG00000178913 | 9.963313735 | 10.16005582 | protein_coding   | 5  | 140698057 | 140700330 | TAF7      |
| ENSG00000178917 | 4.734682531 | 4.693656882 | protein_coding   | 3  | 44540462  | 44552128  | ZNF852    |
| ENSG00000178919 | 5.684325135 | 4.94736961  | protein_coding   | 9  | 100615536 | 100618986 | FOXE1     |
| ENSG00000178921 | 11.27490064 | 11.31667125 | protein_coding   | 17 | 8152604   | 8173809   | PFAS      |
| ENSG00000178922 | 7.273767634 | 7.666288907 | protein_coding   | 1  | 43916824  | 43919660  | HYI       |
| ENSG00000178927 | 8.249639777 | 8.303864205 | protein_coding   | 17 | 80400520  | 80408694  | C17orf62  |
| ENSG00000178932 | 3.911897206 | 3.133298822 | protein_coding   | 17 | 73814896  | 73818071  |           |
| ENSG00000178935 | 6.095241663 | 6.204928885 | protein_coding   | 19 | 58318450  | 58326281  | ZNF552    |
| ENSG00000178947 | 1.616589159 | 1.925536307 | non_coding       | X  | 134555868 | 134559682 | LINC00086 |
| ENSG00000178950 | 10.14491017 | 9.942049496 | protein_coding   | 4  | 843064    | 926161    | GAK       |
| ENSG00000178951 | 10.06478254 | 9.684588223 | protein_coding   | 19 | 4045217   | 4066816   | ZBTB7A    |
| ENSG00000178952 | 12.06933229 | 12.16087443 | protein_coding   | 16 | 28853732  | 28857729  | TUFM      |
| ENSG00000178965 | 0.499066092 | 0           | protein_coding   | 1  | 75033795  | 75139422  | C1orf173  |
| ENSG00000178966 | 8.05038018  | 8.42106413  | protein_coding   | 9  | 86595626  | 86618985  | RMI1      |
| ENSG00000178971 | 9.022652927 | 9.734420434 | protein_coding   | 17 | 8128140   | 8151413   | CTC1      |
| ENSG00000178972 | 0.499066092 | 1.518964905 | pseudogene       | 4  | 144256418 | 144258970 |           |
| ENSG00000178974 | 8.032273249 | 8.37044814  | protein_coding   | 14 | 55738021  | 55828636  | FBXO34    |
| ENSG00000178977 | 2.57521082  | 3.935919592 | antisense        | 17 | 8123960   | 8127361   | LINC00324 |
| ENSG00000178980 | 8.164919416 | 8.700968226 | protein_coding   | 19 | 48281842  | 48287941  | SEPW1     |
| ENSG00000178982 | 9.858667329 | 10.15021936 | protein_coding   | 19 | 39109722  | 39127595  | EIF3K     |
| ENSG00000178988 | 8.518728184 | 8.752849683 | protein_coding   | 4  | 6709428   | 6711607   | MRFAP1L1  |
| ENSG00000178996 | 9.308732943 | 8.932538804 | protein_coding   | 5  | 53813589  | 53842415  | SNX18     |
| ENSG00000178997 | 1.16343121  | 1.667587519 | protein_coding   | 15 | 41474923  | 41522941  | EXD1      |
| ENSG00000178999 | 10.37649554 | 10.97268647 | protein_coding   | 17 | 8108051   | 8113936   | AURKB     |
| ENSG00000179008 | 0           | 0.390640832 | protein_coding   | 14 | 60863187  | 60982261  | C14orf39  |
| ENSG00000179010 | 11.11768565 | 11.16079758 | protein_coding   | 4  | 6641818   | 6644472   | MRFAP1    |
| ENSG00000179021 | 7.136425764 | 7.204272857 | protein_coding   | 3  | 88198893  | 88207118  | C3orf38   |
| ENSG00000179023 | 1.616589159 | 0           | protein_coding   | 1  | 18807424  | 18812534  | KLHDC7A   |
| ENSG00000179029 | 6.236372259 | 7.022976646 | protein_coding   | 17 | 8076555   | 8079717   | TMEM107   |

|                 |             |             |                  |    |           |                     |
|-----------------|-------------|-------------|------------------|----|-----------|---------------------|
| ENSG00000179031 | 0           | 1.667587519 | pseudogene       | X  | 100165700 | 100166480           |
| ENSG00000179038 | 1.799000381 | 1.667587519 | protein_coding   | 11 | 66963391  | 66964638            |
| ENSG00000179041 | 9.276405902 | 8.853271458 | protein_coding   | 8  | 67341263  | 67342966 RRS1       |
| ENSG00000179044 | 2.847891871 | 3.570966319 | protein_coding   | 16 | 67218269  | 67224107 EXOC3L1    |
| ENSG00000179046 | 6.998676229 | 6.742042315 | protein_coding   | 4  | 189012427 | 189030757 TRIML2    |
| ENSG00000179051 | 11.40130517 | 11.12146634 | protein_coding   | 1  | 17733256  | 17766220 RCC2       |
| ENSG00000179057 | 0.869158192 | 1.353254395 | protein_coding   | 11 | 18725852  | 18747777 IGSF22     |
| ENSG00000179058 | 1.16343121  | 0.697730409 | protein_coding   | 9  | 132374504 | 132383055 C9orf50   |
| ENSG00000179059 | 0.499066092 | 0.697730409 | protein_coding   | 4  | 188916925 | 188926204 ZFP42     |
| ENSG00000179061 | 0.499066092 | 0           | pseudogene       | 2  | 25592818  | 25593185            |
| ENSG00000179066 | 0.499066092 | 1.925536307 | protein_coding   | 19 | 35596873  | 35598141            |
| ENSG00000179071 | 1.16343121  | 0.697730409 | protein_coding   | 11 | 85394893  | 85397320 CCDC89     |
| ENSG00000179082 | 1.16343121  | 1.802319292 | processed_transc | 9  | 132083295 | 132087184 C9orf106  |
| ENSG00000179085 | 6.835971536 | 7.711939664 | protein_coding   | 1  | 155112367 | 155113071 DPM3      |
| ENSG00000179091 | 10.25781591 | 10.4904901  | protein_coding   | 8  | 145149930 | 145152428 CYC1      |
| ENSG00000179094 | 9.226515195 | 8.191721221 | protein_coding   | 17 | 8043809   | 8059678 PER1        |
| ENSG00000179101 | 0           | 0.390640832 | pseudogene       | X  | 122648324 | 122648723           |
| ENSG00000179104 | 6.496213887 | 5.486957566 | protein_coding   | 12 | 83080659  | 83528649 TMTC2      |
| ENSG00000179111 | 6.0776925   | 4.622587519 | protein_coding   | 17 | 8023908   | 8027410 HES7        |
| ENSG00000179115 | 11.53530898 | 11.84762072 | protein_coding   | 19 | 13033284  | 13044558 FARSA      |
| ENSG00000179119 | 8.475827914 | 8.34031144  | protein_coding   | 11 | 18627948  | 18656338 SPTY2D1    |
| ENSG00000179131 | 1.407729925 | 0.390640832 | pseudogene       | 7  | 66379568  | 66379930            |
| ENSG00000179133 | 3.077135474 | 1.802319292 | protein_coding   | 10 | 23556124  | 23633774 C10orf67   |
| ENSG00000179134 | 9.078865158 | 8.427593853 | protein_coding   | 19 | 39833108  | 39875535 SAMD4B     |
| ENSG00000179141 | 0.499066092 | 0.697730409 | antisense        | 13 | 30051033  | 30061887 MTUS2-AS1  |
| ENSG00000179148 | 3.950976309 | 3.570966319 | protein_coding   | 17 | 7999218   | 8022234 ALOXE3      |
| ENSG00000179151 | 8.992533411 | 8.76733661  | protein_coding   | 15 | 74922899  | 74988633 EDC3       |
| ENSG00000179152 | 7.31554162  | 7.764467022 | protein_coding   | 3  | 44379611  | 44450943 C3orf23    |
| ENSG00000179157 | 0           | 0.950786998 | pseudogene       | 6  | 43331217  | 43331957            |
| ENSG00000179163 | 6.616550626 | 6.117167886 | protein_coding   | 1  | 24171567  | 24194784 FUCA1      |
| ENSG00000179165 | 0.499066092 | 0.697730409 | protein_coding   | 6  | 36358328  | 36410666 PXT1       |
| ENSG00000179168 | 3.554067925 | 2.721932731 | protein_coding   | 19 | 38874995  | 38878668 GGN        |
| ENSG00000179178 | 0.869158192 | 0           | protein_coding   | 1  | 43735665  | 43739673 TMEM125    |
| ENSG00000179195 | 10.19612778 | 10.0959115  | protein_coding   | 12 | 124456392 | 124499974 ZNF664    |
| ENSG00000179218 | 14.09874683 | 14.36031761 | protein_coding   | 19 | 13049414  | 13055304 CALR       |
| ENSG00000179219 | 1.16343121  | 0           | lincRNA          | 16 | 85316564  | 85319569 LINC00311  |
| ENSG00000179222 | 11.59164972 | 11.58913723 | protein_coding   | X  | 51546103  | 51645453 MAGED1     |
| ENSG00000179240 | 4.292665995 | 5.236305879 | protein_coding   | 11 | 76092357  | 76125663            |
| ENSG00000179241 | 8.14188337  | 8.010476879 | protein_coding   | 11 | 35965531  | 36253686 LDLRAD3    |
| ENSG00000179242 | 1.960915222 | 1.353254395 | protein_coding   | 20 | 59827559  | 60512307 CDH4       |
| ENSG00000179251 | 2.10647801  | 1.16600992  | protein_coding   | 10 | 47151363  | 47151848            |
| ENSG00000179256 | 1.407729925 | 0.390640832 | protein_coding   | 12 | 14957584  | 14967116 C12orf69   |
| ENSG00000179262 | 11.87633872 | 11.86672759 | protein_coding   | 19 | 13056654  | 13064448 RAD23A     |
| ENSG00000179271 | 10.20777098 | 11.07999684 | protein_coding   | 19 | 13064972  | 13068050 GADD45GIP1 |
| ENSG00000179277 | 3.950976309 | 4.319727133 | pseudogene       | 17 | 15690066  | 15690888 MEIS3P1    |
| ENSG00000179284 | 2.671945279 | 3.183544561 | protein_coding   | 19 | 13080432  | 13085567 DAND5      |
| ENSG00000179292 | 0.499066092 | 0.390640832 | protein_coding   | 11 | 66059341  | 66064135 TMEM151A   |
| ENSG00000179294 | 8.154494062 | 8.315177126 | protein_coding   | 17 | 36827961  | 36831187 C17orf96   |
| ENSG00000179295 | 11.03371401 | 10.99087786 | protein_coding   | 12 | 112856155 | 112947717 PTPN11    |
| ENSG00000179296 | 1.616589159 | 2.579085888 | pseudogene       | 10 | 49217898  | 49239743 CTGLF12P   |
| ENSG00000179299 | 3.448790144 | 2.851901313 | protein_coding   | 4  | 40751914  | 40812002 NSUN7      |
| ENSG00000179300 | 3.211941663 | 1.925536307 | protein_coding   | X  | 77911566  | 77914825 ZCCHC5     |
| ENSG00000179304 | 3.830412367 | 3.368666104 | protein_coding   | X  | 52920336  | 52937587 FAM156B    |
| ENSG00000179314 | 1.616589159 | 0.950786998 | protein_coding   | 17 | 5973934   | 6027745 WSCD1       |
| ENSG00000179331 | 0.869158192 | 0           | protein_coding   | 11 | 107799229 | 107834208 RAB39A    |
| ENSG00000179335 | 8.225937332 | 8.266472275 | protein_coding   | 15 | 74890841  | 74932057 CLK3       |
| ENSG00000179342 | 0.499066092 | 0           | pseudogene       | 7  | 65970142  | 65971210            |
| ENSG00000179344 | 0           | 0.390640832 | protein_coding   | 6  | 32627244  | 32636160 HLA-DQB1   |
| ENSG00000179348 | 8.622223055 | 8.419754632 | protein_coding   | 3  | 128198270 | 128212028 GATA2     |
| ENSG00000179361 | 6.664362065 | 5.404622322 | protein_coding   | 15 | 74833518  | 74890472 ARID3B     |
| ENSG00000179362 | 4.642199401 | 5.767861411 | pseudogene       | 15 | 45803334  | 45878488 HMGN2P46   |
| ENSG00000179363 | 0           | 0.950786998 | protein_coding   | X  | 102965837 | 102968956 TMEM31    |
| ENSG00000179364 | 10.2307792  | 9.383796417 | protein_coding   | 14 | 105766900 | 105864484 PACS2     |

|                 |             |             |                  |    |           |           |           |
|-----------------|-------------|-------------|------------------|----|-----------|-----------|-----------|
| ENSG00000179387 | 6.93675248  | 7.332282157 | protein_coding   | 4  | 141445312 | 141474924 | ELMOD2    |
| ENSG00000179388 | 5.301468762 | 1.16600992  | protein_coding   | 8  | 22545172  | 22550815  | EGR3      |
| ENSG00000179397 | 2.238690726 | 3.081239798 | protein_coding   | 1  | 244617679 | 244804479 | C1orf101  |
| ENSG00000179403 | 9.083268927 | 9.29944532  | protein_coding   | 1  | 1370241   | 1378262   | VWA1      |
| ENSG00000179406 | 6.560798025 | 6.155435249 | lincRNA          | 7  | 65841031  | 65866325  | LINC00174 |
| ENSG00000179407 | 0.499066092 | 0           | protein_coding   | 3  | 128181282 | 128186091 | DNAJB8    |
| ENSG00000179409 | 10.39698226 | 10.68043452 | protein_coding   | 17 | 647661    | 655501    | GEMIN4    |
| ENSG00000179428 | 3.146112541 | 2.721932731 | antisense        | 7  | 22765014  | 22767239  |           |
| ENSG00000179431 | 8.320363082 | 8.64266806  | protein_coding   | 11 | 35639735  | 35642419  | FJX1      |
| ENSG00000179454 | 5.707331524 | 6.149127429 | protein_coding   | 14 | 45397672  | 45511525  | KLHL28    |
| ENSG00000179455 | 3.554067925 | 4.021284656 | protein_coding   | 15 | 23810454  | 23873064  | MKRN3     |
| ENSG00000179456 | 7.478203418 | 7.852510423 | protein_coding   | 1  | 244214583 | 244220778 | ZNF238    |
| ENSG00000179467 | 0.499066092 | 0.697730409 | pseudogene       | 20 | 55097413  | 55097855  |           |
| ENSG00000179476 | 4.381167248 | 5.339632724 | protein_coding   | 14 | 45366498  | 45376460  | C14orf28  |
| ENSG00000179477 | 1.16343121  | 3.493416095 | protein_coding   | 17 | 7975954   | 7991022   | ALOX12B   |
| ENSG00000179523 | 5.707331524 | 5.43605125  | lincRNA          | 15 | 44819455  | 44829121  |           |
| ENSG00000179526 | 8.523597116 | 8.617758557 | protein_coding   | 8  | 145153536 | 145163027 | SHARPIN   |
| ENSG00000179528 | 3.652182994 | 3.906303962 | protein_coding   | 2  | 74724644  | 74732192  | LBX2      |
| ENSG00000179532 | 8.921758872 | 9.040423325 | protein_coding   | 11 | 6518490   | 6593257   | DNHD1     |
| ENSG00000179546 | 5.124761037 | 3.368666104 | protein_coding   | 1  | 23516993  | 23521222  | HTR1D     |
| ENSG00000179562 | 8.915598341 | 8.668257984 | protein_coding   | 7  | 127220672 | 127233665 | GCC1      |
| ENSG00000179564 | 1.16343121  | 2.334191469 | protein_coding   | 3  | 50316458  | 50325545  | C3orf45   |
| ENSG00000179580 | 0.499066092 | 1.16600992  | protein_coding   | 16 | 2016824   | 2018976   | RNF151    |
| ENSG00000179583 | 5.255381949 | 3.714580548 | protein_coding   | 16 | 10971039  | 11023624  | CIITA     |
| ENSG00000179588 | 7.781675404 | 7.467704891 | protein_coding   | 16 | 88519725  | 88601572  | ZFPM1     |
| ENSG00000179598 | 6.809636522 | 6.475832214 | protein_coding   | 17 | 17104309  | 17109646  | PLD6      |
| ENSG00000179604 | 10.04120874 | 9.531143663 | protein_coding   | 17 | 71279764  | 71308143  | CDC42EP4  |
| ENSG00000179611 | 2.10647801  | 1.353254395 | pseudogene       | 13 | 44542560  | 44545335  | DGKZP1    |
| ENSG00000179627 | 6.421663777 | 4.932754837 | protein_coding   | 14 | 105266933 | 105271049 | ZBTB42    |
| ENSG00000179630 | 5.752272083 | 5.767861411 | protein_coding   | 13 | 44453420  | 44468067  | LACC1     |
| ENSG00000179632 | 10.08852506 | 10.27784723 | protein_coding   | 8  | 145159402 | 145162514 | MAF1      |
| ENSG00000179673 | 2.238690726 | 1.802319292 | protein_coding   | 17 | 45055523  | 45056614  | RPRML     |
| ENSG00000179674 | 4.491309013 | 2.420525079 | protein_coding   | 3  | 160394948 | 160396233 | ARL14     |
| ENSG00000179698 | 7.266040677 | 7.797107849 | protein_coding   | 8  | 145162629 | 145173218 | KIAA1875  |
| ENSG00000179715 | 8.629769183 | 6.419292172 | protein_coding   | 12 | 47473386  | 47630443  | FAM113B   |
| ENSG00000179743 | 3.989024711 | 4.990346085 | processed_transc | 1  | 16160560  | 16174642  |           |
| ENSG00000179750 | 7.967047117 | 8.222087975 | protein_coding   | 22 | 39378352  | 39388809  | APOBEC3B  |
| ENSG00000179761 | 3.502389126 | 2.851901313 | protein_coding   | 17 | 27369918  | 27384234  | PIPOX     |
| ENSG00000179766 | 1.16343121  | 1.667587519 | pseudogene       | 9  | 35406752  | 35483026  | ATP8B5P   |
| ENSG00000179772 | 1.16343121  | 0.950786998 | protein_coding   | 20 | 30432103  | 30433420  | FOX51     |
| ENSG00000179774 | 0           | 0.390640832 | protein_coding   | 10 | 69990386  | 69991871  | ATOH7     |
| ENSG00000179776 | 6.676071387 | 7.605389119 | protein_coding   | 16 | 66400533  | 66438686  | CDH5      |
| ENSG00000179818 | 5.286269488 | 5.683080141 | processed_transc | 2  | 70189395  | 70315686  | PCBP1-AS1 |
| ENSG00000179820 | 11.43184222 | 10.79015471 | protein_coding   | 19 | 54369477  | 54379691  | MYADM     |
| ENSG00000179826 | 0.499066092 | 2.851901313 | protein_coding   | 11 | 18142502  | 18160027  | MRGPRX3   |
| ENSG00000179832 | 7.565780433 | 7.077141316 | protein_coding   | 8  | 145202919 | 145316843 | HEATR7A   |
| ENSG00000179833 | 9.59671396  | 9.436546455 | protein_coding   | 2  | 64858755  | 64977449  | SERTAD2   |
| ENSG00000179837 | 9.723436728 | 9.5085315   | protein_coding   | 3  | 51428731  | 51435330  | RBM15B    |
| ENSG00000179841 | 3.004694206 | 3.232099092 | protein_coding   | 14 | 64932217  | 64936425  | AKAP5     |
| ENSG00000179846 | 4.097495944 | 3.183544561 | protein_coding   | 19 | 45653008  | 45663408  | NKPD1     |
| ENSG00000179855 | 0.869158192 | 0.390640832 | protein_coding   | 19 | 3585551   | 3593539   | GIPC3     |
| ENSG00000179859 | 5.889353623 | 6.686500471 | antisense        | 17 | 7816642   | 7819271   |           |
| ENSG00000179862 | 4.842525946 | 5.125003832 | protein_coding   | 1  | 41326729  | 41328018  | CITED4    |
| ENSG00000179869 | 3.211941663 | 0.390640832 | protein_coding   | 7  | 48211055  | 48687092  | ABCA13    |
| ENSG00000179873 | 0.499066092 | 1.16600992  | protein_coding   | 19 | 56296770  | 56348128  | NLRP11    |
| ENSG00000179886 | 6.283060568 | 6.440109466 | protein_coding   | 8  | 144680074 | 144682485 | TIGD5     |
| ENSG00000179889 | 10.15540476 | 10.20825661 | protein_coding   | 16 | 15068448  | 15233196  | PDXDC1    |
| ENSG00000179899 | 2.847891871 | 2.579085888 | pseudogene       | 12 | 55804263  | 55808633  | PHC1P1    |
| ENSG00000179902 | 0.499066092 | 0.390640832 | protein_coding   | 1  | 109648573 | 109656479 | C1orf194  |
| ENSG00000179909 | 0           | 0.390640832 | protein_coding   | 19 | 58208735  | 58220579  | ZNF154    |
| ENSG00000179912 | 8.871721931 | 8.512355001 | protein_coding   | 12 | 57643392  | 57824788  | R3HDM2    |
| ENSG00000179913 | 8.013936171 | 3.993387124 | protein_coding   | 19 | 17905919  | 17924385  | B3GNT3    |
| ENSG00000179918 | 4.062237333 | 4.777836593 | protein_coding   | 16 | 30454952  | 30457502  | SEPHS2    |

|                 |             |             |                  |    |           |           |            |
|-----------------|-------------|-------------|------------------|----|-----------|-----------|------------|
| ENSG00000179921 | 2.10647801  | 2.144285137 | protein_coding   | 2  | 219124219 | 219128582 | GPBAR1     |
| ENSG00000179922 | 6.462804234 | 6.515603638 | protein_coding   | 19 | 56132107  | 56135941  | ZNF784     |
| ENSG00000179933 | 8.78516728  | 9.411730515 | protein_coding   | 14 | 23563974  | 23569665  | C14orf119  |
| ENSG00000179934 | 0           | 0.390640832 | protein_coding   | 3  | 39371197  | 39375171  | CCR8       |
| ENSG00000179935 | 0           | 0.950786998 | processed_transc | 20 | 18768295  | 18774979  |            |
| ENSG00000179938 | 0.869158192 | 1.16600992  | protein_coding   | 15 | 30375158  | 30385702  | GOLGA8J    |
| ENSG00000179941 | 6.502803968 | 6.934050347 | protein_coding   | 12 | 76738254  | 76742222  | BBS10      |
| ENSG00000179943 | 7.666067113 | 7.992972811 | protein_coding   | 19 | 56102738  | 56110893  | FIZ1       |
| ENSG00000179950 | 10.37649554 | 10.47701775 | protein_coding   | 8  | 144898514 | 144912029 | PUF60      |
| ENSG00000179954 | 6.112579918 | 6.371325053 | protein_coding   | 19 | 55999870  | 56030466  | SSC5D      |
| ENSG00000179958 | 9.46791839  | 9.393168008 | protein_coding   | 16 | 30434940  | 30441396  | DCTPP1     |
| ENSG00000179965 | 5.124761037 | 6.293387477 | protein_coding   | 16 | 30418618  | 30430745  | ZNF771     |
| ENSG00000179967 | 3.652182994 | 4.021284656 | pseudogene       | 4  | 140036084 | 140036528 | PPP1R14BP3 |
| ENSG00000179978 | 0.869158192 | 0.697730409 | pseudogene       | 5  | 69390202  | 69424261  |            |
| ENSG00000179979 | 7.289098491 | 6.819555981 | protein_coding   | 4  | 1385340   | 1389780   | CRIPAK     |
| ENSG00000179981 | 7.363400307 | 7.492830145 | protein_coding   | 18 | 72922710  | 73001905  | TSHZ1      |
| ENSG00000179988 | 4.491309013 | 5.248158938 | protein_coding   | 10 | 124713897 | 124757029 | PSTK       |
| ENSG00000179994 | 0.499066092 | 0.697730409 | pseudogene       | 7  | 72333321  | 72341076  |            |
| ENSG00000180008 | 8.520352988 | 8.720244202 | protein_coding   | 14 | 55493948  | 55516206  | SOCS4      |
| ENSG00000180011 | 8.37885234  | 8.461080043 | protein_coding   | 18 | 72907063  | 72921303  | ZADH2      |
| ENSG00000180015 | 1.960915222 | 2.721932731 | pseudogene       | 4  | 189659506 | 189660648 |            |
| ENSG00000180019 | 0.499066092 | 0           | pseudogene       | 7  | 112086219 | 112086430 |            |
| ENSG00000180035 | 6.548110424 | 7.278392738 | protein_coding   | 16 | 30389427  | 30411429  | ZNF48      |
| ENSG00000180043 | 0.499066092 | 0.390640832 | protein_coding   | 19 | 55866277  | 55874620  | FAM71E2    |
| ENSG00000180061 | 0           | 0.390640832 | protein_coding   | 19 | 55824169  | 55836708  | TMEM150B   |
| ENSG00000180066 | 4.543379137 | 5.150490275 | protein_coding   | 10 | 134257831 | 134262912 | C10orf91   |
| ENSG00000180071 | 5.774228067 | 6.699508919 | protein_coding   | 9  | 38540564  | 38620657  | ANKRD18A   |
| ENSG00000180083 | 0           | 0.950786998 | protein_coding   | 20 | 44277202  | 44298909  | WFDC11     |
| ENSG00000180089 | 6.830742851 | 6.235021771 | protein_coding   | 19 | 55738002  | 55740632  | TMEM86B    |
| ENSG00000180096 | 3.652182994 | 4.489113623 | protein_coding   | 16 | 30389454  | 30407312  | 1-sep      |
| ENSG00000180098 | 7.60612345  | 7.920752191 | protein_coding   | 1  | 28879597  | 28905051  | TRNAU1AP   |
| ENSG00000180104 | 10.09344535 | 9.97005321  | protein_coding   | 5  | 443273    | 472052    | EXOC3      |
| ENSG00000180113 | 3.335220907 | 4.528525526 | protein_coding   | 6  | 46655612  | 46672056  | TDRD6      |
| ENSG00000180138 | 0.869158192 | 0.950786998 | protein_coding   | 13 | 37677398  | 37679803  | CSNK1A1L   |
| ENSG00000180139 | 0.869158192 | 2.501982735 | antisense        | 10 | 90692441  | 90699731  |            |
| ENSG00000180152 | 0.869158192 | 0           | pseudogene       | 2  | 113610905 | 113611699 |            |
| ENSG00000180155 | 7.334137164 | 6.186567173 | protein_coding   | 8  | 143845752 | 143859640 | LYNX1      |
| ENSG00000180176 | 5.316509574 | 2.144285137 | protein_coding   | 11 | 2185159   | 2193107   | TH         |
| ENSG00000180178 | 0           | 0.697730409 | pseudogene       | 2  | 130748029 | 130808704 |            |
| ENSG00000180182 | 11.11257821 | 10.84313585 | protein_coding   | X  | 40507558  | 40595110  | MED14      |
| ENSG00000180185 | 8.004679484 | 8.200898549 | protein_coding   | 16 | 1876968   | 1890208   | FAHD1      |
| ENSG00000180189 | 1.960915222 | 3.608232228 | pseudogene       | 14 | 58751491  | 58752116  | HMGB1P14   |
| ENSG00000180190 | 6.535310252 | 6.948652068 | protein_coding   | 8  | 439803    | 495781    | C8orf42    |
| ENSG00000180198 | 10.4757196  | 10.40968193 | protein_coding   | 1  | 28832455  | 28865708  | RCC1       |
| ENSG00000180209 | 0.869158192 | 1.353254395 | protein_coding   | 16 | 30382255  | 30389312  | MYLPF      |
| ENSG00000180210 | 0.499066092 | 1.518964905 | protein_coding   | 11 | 46740730  | 46761056  | F2         |
| ENSG00000180211 | 3.077135474 | 4.048652948 | pseudogene       | 6  | 39926153  | 39926572  |            |
| ENSG00000180221 | 0           | 0.390640832 | pseudogene       | 10 | 59972302  | 59972797  |            |
| ENSG00000180228 | 8.470794781 | 8.020878279 | protein_coding   | 2  | 179296141 | 179316239 | PRKRA      |
| ENSG00000180229 | 6.94645393  | 8.253299769 | pseudogene       | 15 | 20587869  | 20711433  | HERC2P3    |
| ENSG00000180233 | 7.50471092  | 7.103479673 | protein_coding   | 7  | 30323923  | 30452118  | ZNRF2      |
| ENSG00000180245 | 0.499066092 | 2.501982735 | protein_coding   | 4  | 110749150 | 110765760 | RRH        |
| ENSG00000180251 | 0           | 0.390640832 | protein_coding   | 2  | 103089762 | 103150431 | SLC9A4     |
| ENSG00000180257 | 6.766474304 | 6.908136232 | protein_coding   | 19 | 53430388  | 53466164  | ZNF816     |
| ENSG00000180263 | 8.613115289 | 8.580741083 | protein_coding   | 12 | 95470525  | 95611258  | FGD6       |
| ENSG00000180279 | 0.499066092 | 0.950786998 | protein_coding   | 19 | 51320937  | 51322131  |            |
| ENSG00000180284 | 0.499066092 | 0.950786998 | pseudogene       | X  | 102906661 | 102907034 |            |
| ENSG00000180304 | 8.429884808 | 8.542748725 | pseudogene       | 15 | 64979773  | 64995417  |            |
| ENSG00000180305 | 0.499066092 | 0           | protein_coding   | 20 | 44258165  | 44259835  | WFDC10A    |
| ENSG00000180316 | 4.352265886 | 3.081239798 | protein_coding   | 6  | 36210980  | 36276372  | PNPLA1     |
| ENSG00000180329 | 7.413224588 | 7.38691391  | protein_coding   | 17 | 42754805  | 42767165  | CCDC43     |
| ENSG00000180332 | 0           | 0.697730409 | protein_coding   | 13 | 45766988  | 45775175  | KCTD4      |
| ENSG00000180336 | 3.652182994 | 3.781359661 | protein_coding   | 17 | 42733762  | 42767676  | C17orf104  |

|                 |             |             |                  |    |           |           |           |
|-----------------|-------------|-------------|------------------|----|-----------|-----------|-----------|
| ENSG00000180340 | 8.385999544 | 8.737164829 | protein_coding   | 17 | 42634827  | 42636907  | FZD2      |
| ENSG00000180346 | 5.431503808 | 5.717592784 | protein_coding   | 4  | 90033968  | 90036050  | TIGD2     |
| ENSG00000180353 | 2.57521082  | 0.697730409 | protein_coding   | 3  | 121350246 | 121379774 | HCLS1     |
| ENSG00000180354 | 8.297803463 | 8.313767852 | protein_coding   | 7  | 30174426  | 30202378  | C7orf41   |
| ENSG00000180357 | 9.487986111 | 9.193855808 | protein_coding   | 15 | 64791491  | 64978264  | ZNF609    |
| ENSG00000180370 | 11.01741032 | 10.68861275 | protein_coding   | 3  | 196466728 | 196559518 | PAK2      |
| ENSG00000180376 | 7.062518763 | 7.392265003 | protein_coding   | 3  | 56591189  | 56655846  | CCDC66    |
| ENSG00000180385 | 6.393570237 | 6.408769788 | pseudogene       | 3  | 10028577  | 10048674  |           |
| ENSG00000180389 | 2.671945279 | 3.608232228 | protein_coding   | 13 | 28519343  | 28519727  | ATP5EP2   |
| ENSG00000180398 | 10.24608033 | 10.21958906 | protein_coding   | 2  | 47129009  | 47168994  | MCFD2     |
| ENSG00000180422 | 2.10647801  | 2.788380093 | lincRNA          | 16 | 89225554  | 89230653  | LINC00304 |
| ENSG00000180423 | 5.684325135 | 5.776071827 | protein_coding   | 11 | 46624411  | 46639459  | HARBI1    |
| ENSG00000180425 | 4.962122459 | 5.784235782 | protein_coding   | 11 | 114262165 | 114271233 | C11orf71  |
| ENSG00000180432 | 0.869158192 | 0           | protein_coding   | 3  | 42897497  | 42917633  | CYP8B1    |
| ENSG00000180438 | 0.499066092 | 0.390640832 | protein_coding   | 3  | 13978756  | 14124311  | TPRXL     |
| ENSG00000180447 | 1.16343121  | 1.667587519 | protein_coding   | 9  | 89559279  | 89562104  | GAS1      |
| ENSG00000180448 | 10.63230386 | 10.18146283 | protein_coding   | 19 | 1065930   | 1086627   | HMHA1     |
| ENSG00000180458 | 4.6658819   | 4.528525526 | protein_coding   | 19 | 38036373  | 38040073  |           |
| ENSG00000180479 | 4.842525946 | 4.794098771 | protein_coding   | 19 | 38053552  | 38085673  | ZNF571    |
| ENSG00000180481 | 1.616589159 | 1.802319292 | protein_coding   | 12 | 75784850  | 75826468  | GLIPR1L2  |
| ENSG00000180488 | 6.994006093 | 7.057067116 | protein_coding   | 1  | 78245309  | 78344106  | FAM73A    |
| ENSG00000180509 | 0.499066092 | 1.16600992  | protein_coding   | 21 | 35818988  | 35884573  | KCNE1     |
| ENSG00000180525 | 1.407729925 | 2.501982735 | protein_coding   | 10 | 695888    | 709947    | C10orf108 |
| ENSG00000180530 | 8.741255403 | 7.875618202 | protein_coding   | 21 | 16333556  | 16437321  | NRIP1     |
| ENSG00000180532 | 2.762599152 | 2.039052734 | protein_coding   | 19 | 58180303  | 58190519  | ZSCAN4    |
| ENSG00000180535 | 5.431503808 | 3.679994897 | protein_coding   | 7  | 97841566  | 97842271  | BHLHA15   |
| ENSG00000180537 | 1.960915222 | 1.925536307 | protein_coding   | 6  | 13924677  | 13980523  | RNF182    |
| ENSG00000180573 | 7.553136766 | 7.915187059 | protein_coding   | 6  | 26124373  | 26139336  | HIST1H2AC |
| ENSG00000180574 | 3.274897671 | 3.493416095 | protein_coding   | 12 | 10658201  | 10675734  |           |
| ENSG00000180581 | 2.35979773  | 1.925536307 | pseudogene       | 10 | 93565803  | 93567253  | SRP9P1    |
| ENSG00000180592 | 4.352265886 | 4.021284656 | protein_coding   | 10 | 21802407  | 21814611  | C10orf140 |
| ENSG00000180596 | 4.19837882  | 4.250702764 | protein_coding   | 6  | 26115129  | 26124154  | HIST1H2BC |
| ENSG00000180610 | 1.960915222 | 1.802319292 | pseudogene       | 4  | 39771701  | 39773000  | ZBTB12B   |
| ENSG00000180611 | 8.235860718 | 8.11126287  | protein_coding   | 3  | 192514604 | 192635950 | MB21D2    |
| ENSG00000180616 | 1.799000381 | 2.579085888 | protein_coding   | 17 | 71161160  | 71168060  | SSTR2     |
| ENSG00000180626 | 6.907250452 | 7.672899552 | protein_coding   | 17 | 5082830   | 5095178   | ZNF594    |
| ENSG00000180628 | 8.994872754 | 9.416990515 | protein_coding   | 10 | 92979908  | 93044088  | PCGF5     |
| ENSG00000180638 | 1.960915222 | 1.518964905 | protein_coding   | 17 | 19581628  | 19622292  | SLC47A2   |
| ENSG00000180660 | 0           | 0.697730409 | protein_coding   | 13 | 36047926  | 36050832  | MAB21L1   |
| ENSG00000180662 | 0.499066092 | 0.950786998 | pseudogene       | 14 | 65934525  | 65935059  |           |
| ENSG00000180667 | 7.50471092  | 6.941369681 | protein_coding   | 1  | 207217194 | 207226325 | YOD1      |
| ENSG00000180672 | 4.903563137 | 1.667587519 | pseudogene       | 2  | 206642540 | 206644433 |           |
| ENSG00000180673 | 1.16343121  | 0.697730409 | pseudogene       | 4  | 63682544  | 63684512  |           |
| ENSG00000180694 | 8.460675529 | 8.306700762 | protein_coding   | 8  | 91634223  | 91803860  | TMEM64    |
| ENSG00000180697 | 0           | 1.16600992  | protein_coding   | 3  | 126245842 | 126277808 | C3orf22   |
| ENSG00000180712 | 0.499066092 | 1.16600992  | processed_transc | 4  | 185261909 | 185275130 |           |
| ENSG00000180720 | 2.238690726 | 0.697730409 | protein_coding   | 11 | 46406640  | 46408107  | CHRM4     |
| ENSG00000180739 | 3.950976309 | 2.144285137 | protein_coding   | 19 | 10623419  | 10628668  | S1PR5     |
| ENSG00000180745 | 0           | 0.697730409 | protein_coding   | 10 | 129676105 | 129691211 | CLRN3     |
| ENSG00000180747 | 4.062237333 | 4.319727133 | pseudogene       | 16 | 21458004  | 21531765  |           |
| ENSG00000180758 | 7.888702948 | 7.392265003 | protein_coding   | 1  | 9160364   | 9189250   | GPR157    |
| ENSG00000180764 | 4.062237333 | 3.993387124 | pseudogene       | 10 | 95717948  | 95721297  | PIPSL     |
| ENSG00000180767 | 0           | 0.697730409 | protein_coding   | 3  | 126243126 | 126262134 | CHST13    |
| ENSG00000180769 | 2.762599152 | 3.532712221 | processed_transc | 4  | 85887538  | 85932430  | WDFY3-AS2 |
| ENSG00000180771 | 8.292108003 | 8.608592853 | pseudogene       | 11 | 94800056  | 94804388  | SRSF8     |
| ENSG00000180773 | 7.2307479   | 7.56568256  | protein_coding   | 11 | 92877341  | 92931130  | SLC36A4   |
| ENSG00000180776 | 7.066972635 | 6.490875274 | protein_coding   | 13 | 21950263  | 22033509  | ZDHHC20   |
| ENSG00000180777 | 0           | 0.697730409 | protein_coding   | 18 | 14748239  | 14852737  | ANKRD30B  |
| ENSG00000180787 | 6.554468172 | 6.673373662 | protein_coding   | 17 | 4981754   | 4999668   | ZFP3      |
| ENSG00000180801 | 7.842689815 | 7.829026491 | protein_coding   | 4  | 114821440 | 114900883 | ARSJ      |
| ENSG00000180806 | 4.593635215 | 5.125003832 | protein_coding   | 12 | 54388679  | 54397121  | HOXC9     |
| ENSG00000180812 | 0.869158192 | 1.518964905 | pseudogene       | 10 | 43977224  | 43978457  |           |
| ENSG00000180815 | 1.616589159 | 0.950786998 | protein_coding   | X  | 19378174  | 19533379  | MAP3K15   |



|                 |             |             |                  |    |           |           |             |
|-----------------|-------------|-------------|------------------|----|-----------|-----------|-------------|
| ENSG00000180817 | 9.984657349 | 9.986509737 | protein_coding   | 10 | 71962587  | 71993667  | PPA1        |
| ENSG00000180818 | 3.652182994 | 4.468996429 | protein_coding   | 12 | 54378849  | 54384063  | HOXC10      |
| ENSG00000180822 | 8.3053626   | 8.613182984 | protein_coding   | 6  | 3231637   | 3303607   | PSMG4       |
| ENSG00000180834 | 5.331395195 | 5.294620694 | protein_coding   | 3  | 183533664 | 183543382 | MAP6D1      |
| ENSG00000180846 | 2.847891871 | 3.411459265 | protein_coding   | 19 | 1952530   | 1954548   | CSNK1G2-AS1 |
| ENSG00000180855 | 5.301468762 | 5.6022688   | protein_coding   | 19 | 12540521  | 12551926  | ZNF443      |
| ENSG00000180861 | 0.499066092 | 0           | protein_coding   | 12 | 13524023  | 13540101  | C12orf36    |
| ENSG00000180867 | 4.923348194 | 5.175534283 | pseudogene       | 1  | 146649692 | 146651206 | PDIA3P      |
| ENSG00000180878 | 0.499066092 | 0           | protein_coding   | 11 | 6226796   | 6232362   | C11orf42    |
| ENSG00000180879 | 10.26267769 | 10.62242012 | protein_coding   | X  | 153058971 | 153063960 | SSR4        |
| ENSG00000180881 | 4.999881834 | 4.888000647 | protein_coding   | 12 | 75669759  | 75784708  | CAPS2       |
| ENSG00000180884 | 5.316509574 | 5.674321415 | protein_coding   | 19 | 35447258  | 35454953  | ZNF792      |
| ENSG00000180891 | 8.223944437 | 7.968104748 | protein_coding   | 17 | 55940337  | 56032684  | CUEDC1      |
| ENSG00000180900 | 10.91397415 | 10.49516031 | protein_coding   | 8  | 144873090 | 144897549 | SCRIB       |
| ENSG00000180901 | 8.325948295 | 8.359562039 | protein_coding   | 17 | 73043279  | 73061979  | KCTD2       |
| ENSG00000180902 | 7.572060955 | 7.176629214 | protein_coding   | 2  | 242673994 | 242708231 | D2HGDH      |
| ENSG00000180914 | 5.286269488 | 5.085909553 | protein_coding   | 3  | 8792094   | 8811314   | OXTR        |
| ENSG00000180917 | 8.137655191 | 8.315177126 | protein_coding   | 16 | 71315292  | 71323618  | FTSJD1      |
| ENSG00000180919 | 0           | 0.390640832 | protein_coding   | 11 | 6128914   | 6130065   | OR56B4      |
| ENSG00000180921 | 9.979941537 | 8.861975727 | protein_coding   | 8  | 144806103 | 144815971 | FAM83H      |
| ENSG00000180929 | 1.616589159 | 1.16600992  | protein_coding   | 3  | 51989330  | 51991509  | GPR62       |
| ENSG00000180938 | 3.830412367 | 4.29708397  | protein_coding   | 8  | 125985540 | 125991631 | ZNF572      |
| ENSG00000180953 | 5.141750194 | 4.857374129 | protein_coding   | 15 | 80191182  | 80216044  | ST20        |
| ENSG00000180957 | 10.94787535 | 10.94769033 | protein_coding   | 22 | 28202413  | 28316122  | PITPNB      |
| ENSG00000180964 | 7.363400307 | 7.480322213 | protein_coding   | X  | 102507923 | 102510131 | TCEAL8      |
| ENSG00000180979 | 6.738827102 | 6.515603638 | protein_coding   | 15 | 42834720  | 42841000  | LRRCS57     |
| ENSG00000180988 | 0           | 0.390640832 | protein_coding   | 11 | 5841544   | 5842578   | OR52N2      |
| ENSG00000180992 | 8.838241835 | 9.315025211 | protein_coding   | 6  | 44081194  | 44095194  | MRPL14      |
| ENSG00000180998 | 1.799000381 | 4.15321211  | protein_coding   | 14 | 53019866  | 53104431  | GPR137C     |
| ENSG00000181004 | 5.938793061 | 6.434933235 | protein_coding   | 4  | 123653857 | 123666098 | BBS12       |
| ENSG00000181007 | 6.567100227 | 6.690849666 | protein_coding   | 19 | 36874593  | 36909558  | ZFP82       |
| ENSG00000181013 | 2.10647801  | 2.242360793 | protein_coding   | 17 | 56618948  | 56621683  | C17orf47    |
| ENSG00000181016 | 3.004694206 | 3.493416095 | protein_coding   | 7  | 112120908 | 112130942 | C7orf53     |
| ENSG00000181019 | 10.83195583 | 10.5737972  | protein_coding   | 16 | 69740899  | 69760854  | NQO1        |
| ENSG00000181026 | 8.875535495 | 8.439273392 | protein_coding   | 15 | 89164527  | 89175513  | AEN         |
| ENSG00000181027 | 6.846372398 | 7.067139131 | protein_coding   | 19 | 47249303  | 47261832  | FKRP        |
| ENSG00000181029 | 9.090943324 | 9.832648794 | protein_coding   | 19 | 7745761   | 7747748   | TRAPPC5     |
| ENSG00000181031 | 7.484876093 | 6.35497494  | protein_coding   | 17 | 62293     | 202888    | RPH3AL      |
| ENSG00000181035 | 6.760987087 | 6.775188634 | protein_coding   | 19 | 19174803  | 19223704  | SLC25A42    |
| ENSG00000181038 | 7.423680977 | 7.747865429 | protein_coding   | 17 | 74722940  | 74729961  | METTTL23    |
| ENSG00000181039 | 4.292665995 | 3.935919592 | protein_coding   | 1  | 145470508 | 145475646 | ANKRD34A    |
| ENSG00000181045 | 6.17992145  | 6.450406542 | protein_coding   | 17 | 78194200  | 78227306  | SLC26A11    |
| ENSG00000181061 | 8.874265427 | 8.93712253  | protein_coding   | 3  | 42798669  | 42846023  | HIGD1A      |
| ENSG00000181085 | 6.023726639 | 5.908941696 | protein_coding   | 8  | 144798429 | 144804628 | MAPK15      |
| ENSG00000181090 | 9.802351442 | 9.621627484 | protein_coding   | 9  | 140513444 | 140764468 | EHMT1       |
| ENSG00000181097 | 3.603959378 | 3.935919592 | antisense        | 8  | 144778324 | 144780583 |             |
| ENSG00000181101 | 0.499066092 | 0.390640832 | pseudogene       | 1  | 175013762 | 175014784 | SDCCAG3P2   |
| ENSG00000181104 | 7.437505974 | 7.093659051 | protein_coding   | 5  | 76011868  | 76031606  | F2R         |
| ENSG00000181123 | 1.16343121  | 0.950786998 | processed_transc | 22 | 30887789  | 30888791  |             |
| ENSG00000181126 | 3.211941663 | 4.810179682 | pseudogene       | 6  | 29758637  | 29765588  | HLA-P       |
| ENSG00000181135 | 6.548110424 | 6.787424764 | protein_coding   | 8  | 144766622 | 144796068 | ZNF707      |
| ENSG00000181143 | 8.052627651 | 3.493416095 | protein_coding   | 19 | 8959520   | 9092018   | MUC16       |
| ENSG00000181163 | 12.06154176 | 12.35774806 | protein_coding   | 5  | 170814120 | 170838141 | NPM1        |
| ENSG00000181191 | 8.730065371 | 8.804937616 | protein_coding   | X  | 68380582  | 68385364  | PJA1        |
| ENSG00000181192 | 9.150911694 | 8.463623996 | protein_coding   | 10 | 12110971  | 12165224  | DHTKD1      |
| ENSG00000181215 | 0           | 0.950786998 | protein_coding   | 4  | 5958845   | 5991545   | C4orf50     |
| ENSG00000181218 | 4.352265886 | 5.018301917 | protein_coding   | 1  | 228645065 | 228645560 | HIST3H2A    |
| ENSG00000181220 | 8.541310587 | 8.14810445  | protein_coding   | 7  | 149169885 | 149194908 | ZNF746      |
| ENSG00000181222 | 11.90476351 | 11.94311554 | protein_coding   | 17 | 7387866   | 7417933   | POLR2A      |
| ENSG00000181227 | 2.471521042 | 2.144285137 | pseudogene       | 1  | 76209103  | 76210461  |             |
| ENSG00000181240 | 1.799000381 | 2.242360793 | protein_coding   | 19 | 6426050   | 6433790   | SLC25A41    |
| ENSG00000181260 | 0.499066092 | 0           | pseudogene       | 3  | 179182134 | 179183116 |             |
| ENSG00000181264 | 6.25990527  | 6.977419495 | protein_coding   | 11 | 120195838 | 120204391 | TMEM136     |

|                 |             |             |                  |    |           |           |           |
|-----------------|-------------|-------------|------------------|----|-----------|-----------|-----------|
| ENSG00000181274 | 7.04456449  | 7.359856617 | protein_coding   | 10 | 99092255  | 99094458  | FRAT2     |
| ENSG00000181284 | 7.800519667 | 7.646273261 | protein_coding   | 17 | 7338762   | 7340998   | TMEM102   |
| ENSG00000181315 | 4.689181911 | 5.259915406 | protein_coding   | 6  | 26636518  | 26659980  | ZNF322    |
| ENSG00000181322 | 3.211941663 | 2.788380093 | protein_coding   | 3  | 137980279 | 138048728 | NME9      |
| ENSG00000181323 | 0.869158192 | 2.334191469 | protein_coding   | 17 | 7323643   | 7327553   | SPEM1     |
| ENSG00000181333 | 2.928422289 | 4.15321211  | protein_coding   | 11 | 93754527  | 93846917  | HEPHL1    |
| ENSG00000181350 | 5.124761037 | 5.283144778 | protein_coding   | 17 | 16344891  | 16395467  | FAM211A   |
| ENSG00000181355 | 2.471521042 | 2.420525079 | protein_coding   | 6  | 9596343   | 10211841  | OFCC1     |
| ENSG00000181358 | 0.499066092 | 0           | pseudogene       | 13 | 50464727  | 50467134  | CTAGE10P  |
| ENSG00000181359 | 1.960915222 | 0.697730409 | pseudogene       | 4  | 171502621 | 171526601 | HSP90AA6P |
| ENSG00000181378 | 0           | 0.950786998 | protein_coding   | 2  | 219867568 | 219906249 | CCDC108   |
| ENSG00000181381 | 9.158235462 | 9.883881858 | protein_coding   | 4  | 169277886 | 169458937 | DDX60L    |
| ENSG00000181392 | 5.512107582 | 2.501982735 | protein_coding   | 19 | 36494209  | 36499695  | C19orf46  |
| ENSG00000181396 | 8.265227794 | 8.493806588 | protein_coding   | 17 | 80347086  | 80376513  | C17orf101 |
| ENSG00000181404 | 4.800350936 | 5.072639111 | pseudogene       | 9  | 14511     | 29739     |           |
| ENSG00000181408 | 0           | 0.390640832 | protein_coding   | 17 | 80332153  | 80333462  | UTS2R     |
| ENSG00000181409 | 3.78787645  | 2.721932731 | protein_coding   | 17 | 79091095  | 79139872  | AATK      |
| ENSG00000181418 | 5.239686603 | 3.279072565 | protein_coding   | 12 | 49388932  | 49393092  | DDN       |
| ENSG00000181444 | 5.512107582 | 5.059245468 | protein_coding   | 7  | 149461271 | 149470568 | ZNF467    |
| ENSG00000181449 | 3.448790144 | 0           | protein_coding   | 3  | 181429714 | 181432221 | SOX2      |
| ENSG00000181450 | 5.417620896 | 5.840125386 | protein_coding   | 1  | 227751236 | 227847594 | ZNF678    |
| ENSG00000181458 | 7.017207048 | 8.120964787 | protein_coding   | 3  | 100211463 | 100296288 | TMEM45A   |
| ENSG00000181467 | 9.936182363 | 8.89344947  | protein_coding   | 3  | 152880029 | 152886265 | RAP2B     |
| ENSG00000181472 | 8.085926212 | 7.813155441 | protein_coding   | 6  | 151685252 | 151712683 | ZBTB2     |
| ENSG00000181481 | 8.036821332 | 7.86795666  | protein_coding   | 17 | 29298041  | 29326929  | RNF135    |
| ENSG00000181511 | 0.869158192 | 0.390640832 | pseudogene       | X  | 119866948 | 119867250 |           |
| ENSG00000181513 | 6.604346021 | 6.877938671 | protein_coding   | 17 | 43209967  | 43221539  | ACBD4     |
| ENSG00000181523 | 8.229914881 | 8.399968169 | protein_coding   | 17 | 78183079  | 78194199  | SGSH      |
| ENSG00000181524 | 3.146112541 | 3.570966319 | pseudogene       | 6  | 42924083  | 42924503  | RPL24P4   |
| ENSG00000181544 | 6.095241663 | 6.815578497 | protein_coding   | X  | 14861529  | 14891191  | FANCB     |
| ENSG00000181555 | 9.474638693 | 9.492427169 | protein_coding   | 3  | 47057900  | 47205467  | SETD2     |
| ENSG00000181577 | 3.744048221 | 3.133298822 | protein_coding   | 6  | 43968317  | 43972887  | C6orf223  |
| ENSG00000181585 | 3.448790144 | 3.081239798 | protein_coding   | 3  | 46742823  | 46752376  | TMIE      |
| ENSG00000181588 | 9.787584866 | 9.452642986 | protein_coding   | 19 | 1554669   | 1568057   | MEX3D     |
| ENSG00000181609 | 0.499066092 | 0.390640832 | protein_coding   | 11 | 5509915   | 5510979   | OR52D1    |
| ENSG00000181610 | 8.81194861  | 9.163664959 | protein_coding   | 17 | 55916842  | 55927399  | MRPS23    |
| ENSG00000181616 | 0.499066092 | 0           | protein_coding   | 11 | 5565719   | 5566779   | OR52H1    |
| ENSG00000181617 | 0.869158192 | 3.679994897 | protein_coding   | 4  | 71091788  | 71100969  | FDCSP     |
| ENSG00000181619 | 5.512107582 | 5.306006045 | protein_coding   | 14 | 59895740  | 59932060  | GPR135    |
| ENSG00000181625 | 1.16343121  | 1.518964905 | protein_coding   | 16 | 29465822  | 29469540  | SLX1B     |
| ENSG00000181634 | 1.16343121  | 2.420525079 | protein_coding   | 9  | 117551600 | 117568406 | TNFSF15   |
| ENSG00000181638 | 7.792473675 | 7.694718794 | protein_coding   | 8  | 144328991 | 144358573 | ZFP41     |
| ENSG00000181649 | 9.319971717 | 8.200898549 | protein_coding   | 11 | 2949503   | 2950685   | PHLDA2    |
| ENSG00000181652 | 6.112579918 | 6.615068802 | processed_transc | 7  | 150709302 | 150721586 | ATG9B     |
| ENSG00000181656 | 0.499066092 | 0           | protein_coding   | 1  | 101003693 | 101007574 | GPR88     |
| ENSG00000181666 | 8.112022537 | 8.316585024 | protein_coding   | 19 | 37808813  | 37855355  | HKR1      |
| ENSG00000181690 | 6.155035276 | 6.577981353 | protein_coding   | 8  | 57073463  | 57123883  | PLAG1     |
| ENSG00000181704 | 8.839544001 | 9.031020259 | protein_coding   | X  | 67718165  | 67757127  | YIPF6     |
| ENSG00000181722 | 3.78787645  | 3.96493948  | protein_coding   | 3  | 114056941 | 114866118 | ZBTB20    |
| ENSG00000181741 | 0.869158192 | 0           | pseudogene       | 20 | 33063729  | 33064279  | FDX1P1    |
| ENSG00000181744 | 7.222786417 | 7.442134301 | protein_coding   | 3  | 143690640 | 143767561 | C3orf58   |
| ENSG00000181751 | 6.912209543 | 7.195117037 | protein_coding   | 5  | 102594403 | 102614361 | C5orf30   |
| ENSG00000181754 | 2.928422289 | 3.081239798 | protein_coding   | 1  | 110046797 | 110052360 | AMIGO1    |
| ENSG00000181773 | 4.842525946 | 5.059245468 | protein_coding   | 1  | 27719148  | 27722318  | GPR3      |
| ENSG00000181781 | 5.538004898 | 6.110690132 | protein_coding   | 19 | 463344    | 474983    | ODF3L2    |
| ENSG00000181788 | 8.480843549 | 8.273738696 | protein_coding   | 3  | 150458914 | 150481264 | SIAH2     |
| ENSG00000181789 | 11.8136165  | 11.30004203 | protein_coding   | 3  | 128968449 | 128996614 | COPG      |
| ENSG00000181790 | 4.165528823 | 4.810179682 | protein_coding   | 8  | 143530791 | 143626370 | BAI1      |
| ENSG00000181798 | 3.652182994 | 2.971122874 | processed_transc | 2  | 232373137 | 232379050 | LINC00471 |
| ENSG00000181800 | 0.869158192 | 0.697730409 | protein_coding   | 10 | 11358797  | 11361847  | C10orf31  |
| ENSG00000181804 | 6.155035276 | 5.953060722 | protein_coding   | 3  | 142984064 | 143567373 | SLC9A9    |
| ENSG00000181817 | 7.72361917  | 8.034631177 | protein_coding   | 1  | 36856839  | 36863493  | LSM10     |
| ENSG00000181826 | 5.986594255 | 5.656642807 | protein_coding   | 4  | 37592422  | 37687998  | RELL1     |

|                 |             |             |                  |    |           |           |          |
|-----------------|-------------|-------------|------------------|----|-----------|-----------|----------|
| ENSG00000181827 | 8.958179637 | 8.69988975  | protein_coding   | 15 | 56379478  | 56535483  | RFX7     |
| ENSG00000181830 | 9.066685021 | 8.859080135 | protein_coding   | 11 | 45825623  | 45834566  | SLC35C1  |
| ENSG00000181847 | 0.869158192 | 0           | protein_coding   | 3  | 113995760 | 114029135 | TIGIT    |
| ENSG00000181852 | 9.236434621 | 9.432007055 | protein_coding   | 12 | 56598285  | 56615737  | RNF41    |
| ENSG00000181856 | 4.131913373 | 3.493416095 | protein_coding   | 17 | 7185053   | 7191576   | SLC2A4   |
| ENSG00000181873 | 6.573375019 | 6.952279523 | protein_coding   | 1  | 228353516 | 228369958 | IBA57    |
| ENSG00000181877 | 1.616589159 | 2.420525079 | protein_coding   | 4  | 1189609   | 1195204   |          |
| ENSG00000181885 | 8.894453552 | 4.990346085 | protein_coding   | 17 | 7163223   | 7166512   | CLDN7    |
| ENSG00000181894 | 8.314756163 | 8.135396417 | protein_coding   | 19 | 58637697  | 58666477  | ZNF329   |
| ENSG00000181896 | 7.169937448 | 7.225413142 | protein_coding   | 19 | 19779605  | 19791761  | ZNF101   |
| ENSG00000181903 | 0.499066092 | 0           | protein_coding   | 11 | 55432614  | 55433671  | OR4C6    |
| ENSG00000181904 | 8.616157604 | 8.773501036 | protein_coding   | 5  | 134181370 | 134195427 | C5orf24  |
| ENSG00000181908 | 1.407729925 | 0.950786998 | protein_coding   | 11 | 64216546  | 64219126  |          |
| ENSG00000181915 | 8.508940744 | 8.273738696 | protein_coding   | 10 | 64564516  | 64568238  | ADO      |
| ENSG00000181924 | 9.054401174 | 9.483053775 | protein_coding   | 11 | 73583712  | 73588033  | CHCHD8   |
| ENSG00000181929 | 8.414239457 | 8.783716905 | protein_coding   | 12 | 49396057  | 49412980  | PRKAG1   |
| ENSG00000181938 | 8.528449672 | 9.125618162 | protein_coding   | 16 | 58328984  | 58440048  | GIN53    |
| ENSG00000181982 | 5.879259127 | 6.270323763 | protein_coding   | 4  | 24807739  | 24981826  | CCDC149  |
| ENSG00000181991 | 8.009315251 | 8.610889744 | protein_coding   | 15 | 89010684  | 89022222  | MRPS11   |
| ENSG00000181997 | 0.499066092 | 0           | pseudogene       | 9  | 69633978  | 69650004  | AQP7P2   |
| ENSG00000182004 | 7.773523328 | 8.16070152  | protein_coding   | 1  | 203830731 | 203839678 | SNRPE    |
| ENSG00000182010 | 3.78787645  | 4.903073497 | protein_coding   | 10 | 63942794  | 64028466  | RTKN2    |
| ENSG00000182021 | 2.928422289 | 1.925536307 | lincRNA          | 9  | 67017400  | 67032072  |          |
| ENSG00000182022 | 9.753451503 | 9.754816173 | protein_coding   | 10 | 125767184 | 125853206 | CHST15   |
| ENSG00000182035 | 0.499066092 | 0.390640832 | protein_coding   | 20 | 37209838  | 37217106  | ADIG     |
| ENSG00000182040 | 1.407729925 | 1.925536307 | protein_coding   | 17 | 72912176  | 72919351  | USH1G    |
| ENSG00000182048 | 0.499066092 | 0           | pseudogene       | 11 | 3631131   | 3658789   | TRPC2    |
| ENSG00000182050 | 0           | 1.16600992  | protein_coding   | 12 | 86372516  | 86889092  | MGAT4C   |
| ENSG00000182054 | 9.719905763 | 10.5994706  | protein_coding   | 15 | 90626277  | 90645736  | IDH2     |
| ENSG00000182057 | 4.097495944 | 4.29708397  | lincRNA          | 22 | 42665759  | 42671202  |          |
| ENSG00000182087 | 11.27898561 | 11.39755719 | protein_coding   | 19 | 1009650   | 1021141   | C19orf6  |
| ENSG00000182093 | 7.277615649 | 7.362585296 | protein_coding   | 21 | 40752170  | 40800454  | WRB      |
| ENSG00000182095 | 11.73288208 | 11.05912178 | protein_coding   | 7  | 5346421   | 5465045   | TNRC18   |
| ENSG00000182107 | 7.132181536 | 0.390640832 | protein_coding   | 14 | 61744088  | 61748558  | TMEM30B  |
| ENSG00000182108 | 6.94645393  | 7.053694091 | protein_coding   | 16 | 11022748  | 11036317  | DEXI     |
| ENSG00000182109 | 4.734682531 | 4.710890357 | processed_transc | 1  | 39987952  | 40011859  |          |
| ENSG00000182111 | 0.499066092 | 0.697730409 | protein_coding   | 7  | 57509883  | 57533265  | ZNF716   |
| ENSG00000182117 | 9.291708897 | 9.782079226 | protein_coding   | 15 | 34633917  | 34635378  | NOP10    |
| ENSG00000182118 | 6.095241663 | 5.404622322 | protein_coding   | 1  | 231154704 | 231175992 | FAM89A   |
| ENSG00000182134 | 8.394884042 | 8.010476879 | protein_coding   | 1  | 151742583 | 151763892 | TDRKH    |
| ENSG00000182141 | 7.115078652 | 7.603083446 | protein_coding   | 19 | 21473963  | 21512212  | ZNF708   |
| ENSG00000182149 | 9.845117281 | 10.00278066 | protein_coding   | 16 | 71919136  | 71962913  | IST1     |
| ENSG00000182150 | 8.072698871 | 8.295320915 | protein_coding   | 9  | 98637900  | 98776842  | C9orf102 |
| ENSG00000182154 | 8.608539753 | 8.973277306 | protein_coding   | 9  | 140445651 | 140447007 | MRPL41   |
| ENSG00000182158 | 10.46225768 | 9.70300667  | protein_coding   | 7  | 137559725 | 137686813 | CREB3L2  |
| ENSG00000182162 | 1.16343121  | 0.697730409 | protein_coding   | X  | 1581465   | 1656000   | P2RY8    |
| ENSG00000182165 | 5.239686603 | 5.339632724 | processed_transc | 7  | 86954541  | 86974831  | TP53TG1  |
| ENSG00000182168 | 1.616589159 | 2.501982735 | protein_coding   | 4  | 96083655  | 96470357  | UNC5C    |
| ENSG00000182173 | 8.085926212 | 7.887034762 | protein_coding   | 17 | 73511788  | 73520820  | TSEN54   |
| ENSG00000182175 | 1.616589159 | 0.950786998 | protein_coding   | 15 | 93586636  | 93632433  | RGMA     |
| ENSG00000182179 | 8.653654925 | 8.834721487 | protein_coding   | 3  | 49842640  | 49851379  | UBA7     |
| ENSG00000182180 | 9.873363279 | 9.516516751 | protein_coding   | 10 | 75006510  | 75012451  | MRPS16   |
| ENSG00000182183 | 0           | 0.697730409 | protein_coding   | 1  | 53099016  | 53135355  | FAM159A  |
| ENSG00000182185 | 6.313367288 | 6.733635362 | protein_coding   | 14 | 68286496  | 69196935  | RAD51B   |
| ENSG00000182195 | 9.92763636  | 10.01280331 | protein_coding   | X  | 140269934 | 140271310 | LDOC1    |
| ENSG00000182196 | 1.960915222 | 2.912743273 | protein_coding   | 12 | 123464333 | 123467456 | ARL6IP4  |
| ENSG00000182197 | 10.78372758 | 10.32757313 | protein_coding   | 8  | 118806729 | 119124092 | EXT1     |
| ENSG00000182199 | 11.94176197 | 12.32655617 | protein_coding   | 12 | 57623110  | 57628718  | SHMT2    |
| ENSG00000182208 | 7.974178365 | 8.288162655 | protein_coding   | 11 | 1490687   | 1522477   | MOB2     |
| ENSG00000182218 | 1.16343121  | 0.390640832 | protein_coding   | 14 | 100111447 | 100146906 | HHIPL1   |
| ENSG00000182220 | 10.30241043 | 11.07833791 | protein_coding   | X  | 40440146  | 40465889  | ATP6AP2  |
| ENSG00000182223 | 1.616589159 | 1.353254395 | protein_coding   | 4  | 48492269  | 48509084  | ZAR1     |
| ENSG00000182224 | 8.893200037 | 9.155034101 | protein_coding   | 17 | 7761064   | 7780399   | CYB5D1   |

|                 |             |             |                |    |           |           |           |
|-----------------|-------------|-------------|----------------|----|-----------|-----------|-----------|
| ENSG00000182240 | 9.062230259 | 9.699773395 | protein_coding | 21 | 42539728  | 42648524  | BACE2     |
| ENSG00000182247 | 7.834876234 | 8.124184315 | protein_coding | 3  | 23244511  | 23633284  | UBE2E2    |
| ENSG00000182253 | 7.206730419 | 7.142107001 | protein_coding | 15 | 99638420  | 99675798  | SYNM      |
| ENSG00000182257 | 3.004694206 | 2.971122874 | protein_coding | 22 | 46445358  | 46450024  | C22orf26  |
| ENSG00000182261 | 2.10647801  | 0.697730409 | protein_coding | 11 | 7980971   | 7986973   | NLRP10    |
| ENSG00000182263 | 7.868433623 | 7.500283181 | protein_coding | 2  | 164449906 | 164592522 | FIGN      |
| ENSG00000182264 | 1.616589159 | 2.242360793 | protein_coding | 19 | 49244145  | 49250166  | IZUMO1    |
| ENSG00000182272 | 5.909333162 | 5.018301917 | protein_coding | 11 | 369796    | 382116    | B4GALNT4  |
| ENSG00000182287 | 8.414239457 | 9.084889332 | protein_coding | X  | 15843929  | 15873054  | AP1S2     |
| ENSG00000182307 | 8.652173596 | 8.537928553 | protein_coding | 8  | 146277764 | 146281416 | C8orf33   |
| ENSG00000182308 | 3.989024711 | 4.385599336 | protein_coding | 4  | 41983713  | 41988476  | DCAF4L1   |
| ENSG00000182310 | 4.097495944 | 4.342020395 | pseudogene     | 19 | 52196614  | 52197610  | LINC00085 |
| ENSG00000182318 | 7.845284967 | 7.672899552 | protein_coding | 19 | 58838385  | 58853712  | ZSCAN22   |
| ENSG00000182319 | 8.805299741 | 7.9428005   | protein_coding | 8  | 8175258   | 8244008   |           |
| ENSG00000182324 | 6.721980839 | 5.317302248 | protein_coding | 19 | 48958766  | 48969367  | KCNJ14    |
| ENSG00000182325 | 7.712290964 | 8.18248514  | protein_coding | 8  | 145579091 | 145583036 | FBXL6     |
| ENSG00000182326 | 9.978760171 | 11.01427562 | protein_coding | 12 | 7096351   | 7178336   | C1S       |
| ENSG00000182327 | 1.616589159 | 3.493416095 | protein_coding | 17 | 4692307   | 4693591   | GLTPD2    |
| ENSG00000182329 | 0.499066092 | 0           | protein_coding | 2  | 202937978 | 203062585 |           |
| ENSG00000182334 | 0           | 0.390640832 | protein_coding | 11 | 7846584   | 7847519   | OR5P3     |
| ENSG00000182347 | 0           | 0.697730409 | pseudogene     | 9  | 5084999   | 5086112   |           |
| ENSG00000182359 | 4.026095388 | 5.22435463  | protein_coding | 11 | 105921825 | 105948492 | KBTBD3    |
| ENSG00000182362 | 5.785082014 | 6.35497494  | protein_coding | 21 | 47706251  | 47717665  | YBEY      |
| ENSG00000182366 | 0.869158192 | 0           | pseudogene     | 8  | 325934    | 333174    | FAM87A    |
| ENSG00000182368 | 2.671945279 | 3.081239798 | protein_coding | 9  | 45727107  | 45728274  | FAM27A    |
| ENSG00000182372 | 7.840089987 | 7.905863867 | protein_coding | 8  | 1703944   | 1734738   | CLN8      |
| ENSG00000182376 | 2.10647801  | 3.232099092 | antisense      | 16 | 88809175  | 88812156  |           |
| ENSG00000182378 | 5.360713447 | 4.903073497 | protein_coding | X  | 192989    | 220023    | PLCXD1    |
| ENSG00000182379 | 6.592037289 | 6.338437404 | protein_coding | 12 | 57610578  | 57620232  | NXPH4     |
| ENSG00000182383 | 0.499066092 | 0           | pseudogene     | 5  | 74286014  | 74286462  |           |
| ENSG00000182389 | 2.471521042 | 1.353254395 | protein_coding | 2  | 152689290 | 152955593 | CACNB4    |
| ENSG00000182393 | 0.869158192 | 0.697730409 | protein_coding | 19 | 39786965  | 39789312  | IL29      |
| ENSG00000182397 | 1.799000381 | 2.334191469 | pseudogene     | 15 | 100330361 | 100347132 | DNM1P46   |
| ENSG00000182400 | 7.511262389 | 7.881337775 | protein_coding | 14 | 39617015  | 39639736  | TRAPPC6B  |
| ENSG00000182404 | 0           | 1.16600992  | sense_intronic | 6  | 128768789 | 128770446 |           |
| ENSG00000182405 | 4.903563137 | 4.7279204   | protein_coding | 15 | 34394274  | 34396591  | PGBD4     |
| ENSG00000182446 | 10.92382946 | 10.50661594 | protein_coding | 17 | 79523915  | 79616376  | NPLOC4    |
| ENSG00000182450 | 0           | 0.390640832 | protein_coding | 11 | 64058774  | 64072241  | KCNK4     |
| ENSG00000182459 | 5.072559152 | 6.480864016 | protein_coding | 17 | 80317123  | 80321652  | TEX19     |
| ENSG00000182463 | 5.729976786 | 6.009862691 | protein_coding | 20 | 51588946  | 52107617  | TSHZ2     |
| ENSG00000182472 | 3.274897671 | 1.802319292 | protein_coding | 19 | 39220832  | 39235114  | CAPN12    |
| ENSG00000182473 | 9.541775001 | 9.839520617 | protein_coding | 17 | 74077087  | 74099868  | EXOC7     |
| ENSG00000182477 | 0           | 0.390640832 | pseudogene     | 6  | 28021006  | 28021943  | OR2B8P    |
| ENSG00000182481 | 11.25868748 | 11.45157859 | protein_coding | 17 | 66031848  | 66042969  | KPNA2     |
| ENSG00000182484 | 7.127924785 | 7.10998981  | protein_coding | X  | 155249967 | 155255375 | WASH6P    |
| ENSG00000182489 | 2.57521082  | 2.144285137 | protein_coding | X  | 100168431 | 100184422 | XKRX      |
| ENSG00000182492 | 2.471521042 | 1.925536307 | protein_coding | X  | 152760397 | 152775012 | BGN       |
| ENSG00000182500 | 8.809292739 | 8.806942451 | protein_coding | 12 | 122064455 | 122080583 | ORA11     |
| ENSG00000182502 | 0.499066092 | 0           | pseudogene     | 22 | 22469236  | 22472374  | FAM108A6P |
| ENSG00000182504 | 7.633406721 | 7.591499486 | protein_coding | 3  | 101442769 | 101489406 | CEP97     |
| ENSG00000182511 | 2.928422289 | 1.16600992  | protein_coding | 15 | 91426925  | 91439006  | FES       |
| ENSG00000182512 | 9.305909516 | 8.679244009 | protein_coding | 14 | 95999840  | 96011061  | GLRX5     |
| ENSG00000182518 | 6.196276899 | 7.067139131 | protein_coding | X  | 55169535  | 55187743  | FAM104B   |
| ENSG00000182521 | 0.499066092 | 0.390640832 | protein_coding | 14 | 55880259  | 55923444  | TBPL2     |
| ENSG00000182533 | 0.499066092 | 0.950786998 | protein_coding | 3  | 8775486   | 8883492   | CAV3      |
| ENSG00000182534 | 10.13539932 | 10.85964836 | protein_coding | 17 | 74671809  | 74707087  | MXRA7     |
| ENSG00000182541 | 8.541310587 | 8.890616425 | protein_coding | 22 | 31608225  | 31676066  | LIMK2     |
| ENSG00000182544 | 8.665451116 | 8.966118473 | protein_coding | 12 | 53645035  | 53648189  | MFSD5     |
| ENSG00000182551 | 9.31342641  | 9.97005321  | protein_coding | 2  | 3501693   | 3523507   | ADI1      |
| ENSG00000182552 | 7.517784241 | 7.959118381 | protein_coding | 4  | 184560788 | 184580378 | RWDD4     |
| ENSG00000182557 | 3.393122761 | 4.761389014 | protein_coding | 17 | 4337219   | 4391498   | SPNS3     |
| ENSG00000182568 | 4.165528823 | 6.174194902 | protein_coding | 3  | 18386864  | 18487080  | SATB1     |
| ENSG00000182572 | 1.799000381 | 0.950786998 | protein_coding | 6  | 27839623  | 27840099  | HIST1H3I  |

|                 |             |             |                  |    |           |                    |
|-----------------|-------------|-------------|------------------|----|-----------|--------------------|
| ENSG00000182574 | 0           | 0.950786998 | pseudogene       | X  | 100211594 | 100212528          |
| ENSG00000182575 | 1.960915222 | 0.950786998 | protein_coding   | 17 | 47653220  | 47659652 NXPH3     |
| ENSG00000182578 | 5.431503808 | 4.990346085 | protein_coding   | 5  | 149432854 | 149492935 CSF1R    |
| ENSG00000182580 | 4.409500985 | 2.851901313 | protein_coding   | 3  | 184279572 | 184300197 EPHB3    |
| ENSG00000182584 | 5.660945913 | 6.071200665 | protein_coding   | 20 | 32254304  | 32256331 ACTL10    |
| ENSG00000182585 | 1.799000381 | 0           | protein_coding   | 4  | 75174190  | 75181024 EPGN      |
| ENSG00000182586 | 0.499066092 | 0.950786998 | antisense        | 21 | 46654267  | 46678645 LINC00334 |
| ENSG00000182600 | 4.491309013 | 3.232099092 | protein_coding   | 2  | 233721980 | 233743418 C2orf82  |
| ENSG00000182606 | 9.396283191 | 8.870627795 | protein_coding   | 3  | 42055294  | 42267381 TRAK1     |
| ENSG00000182611 | 1.616589159 | 1.667587519 | protein_coding   | 6  | 27782112  | 27782607 HIST1H2AJ |
| ENSG00000182612 | 4.842525946 | 5.486957566 | protein_coding   | 17 | 79609349  | 79615779 TSPAN10   |
| ENSG00000182621 | 3.950976309 | 1.518964905 | protein_coding   | 20 | 8112824   | 8949003 PLCB1      |
| ENSG00000182628 | 9.482995289 | 9.139208113 | protein_coding   | 17 | 57187308  | 57232800 SKA2      |
| ENSG00000182632 | 0.869158192 | 0.697730409 | protein_coding   | 10 | 42903616  | 42970797 CCNYL2    |
| ENSG00000182646 | 1.960915222 | 1.925536307 | protein_coding   | X  | 52976462  | 53024651 FAM156A   |
| ENSG00000182648 | 1.799000381 | 3.279072565 | processed_transc | 7  | 156264890 | 156433286          |
| ENSG00000182670 | 10.60614758 | 10.94996007 | protein_coding   | 21 | 38445526  | 38575413 TTC3      |
| ENSG00000182676 | 0.499066092 | 0.390640832 | protein_coding   | 17 | 79791368  | 79792926 PPP1R27   |
| ENSG00000182685 | 5.036678094 | 4.65855978  | protein_coding   | 16 | 2259254   | 2261951 C16orf79   |
| ENSG00000182687 | 0.869158192 | 1.518964905 | protein_coding   | 17 | 74070875  | 74073622 GALR2     |
| ENSG00000182700 | 5.346128795 | 6.016808232 | protein_coding   | 5  | 139505521 | 139508391 IGIP     |
| ENSG00000182704 | 9.397167781 | 8.414504719 | protein_coding   | 11 | 76493295  | 76509198 TSKU      |
| ENSG00000182718 | 12.48903024 | 12.29931094 | protein_coding   | 15 | 60639333  | 60695082 ANXA2     |
| ENSG00000182722 | 1.616589159 | 1.353254395 | pseudogene       | 7  | 64312775  | 64313732 SEPHS1P1  |
| ENSG00000182732 | 3.989024711 | 2.334191469 | protein_coding   | 14 | 72315323  | 73030654 RGS6      |
| ENSG00000182742 | 0           | 0.950786998 | protein_coding   | 17 | 46652875  | 46657473 HOXB4     |
| ENSG00000182749 | 6.984620223 | 6.142791909 | protein_coding   | 1  | 26187701  | 26197744 PAQR7     |
| ENSG00000182752 | 6.573375019 | 6.535085617 | protein_coding   | 9  | 118916083 | 119164601 PAPPA    |
| ENSG00000182759 | 2.10647801  | 2.144285137 | protein_coding   | 8  | 144501352 | 144512576 MAFA     |
| ENSG00000182768 | 7.754320745 | 7.91704449  | protein_coding   | 15 | 90808891  | 90816463 NGRN      |
| ENSG00000182771 | 0.869158192 | 1.353254395 | protein_coding   | 10 | 87359312  | 88126250 GRID1     |
| ENSG00000182782 | 3.211941663 | 0.390640832 | protein_coding   | 12 | 123185840 | 123187890 HCAR2    |
| ENSG00000182791 | 3.335220907 | 3.081239798 | protein_coding   | 11 | 66357640  | 66360554 CCDC87    |
| ENSG00000182795 | 5.255381949 | 1.353254395 | protein_coding   | 1  | 207191866 | 207206101 C1orf116 |
| ENSG00000182796 | 7.178195136 | 7.029859489 | pseudogene       | 12 | 56223529  | 56230030 TMEM198B  |
| ENSG00000182798 | 0.869158192 | 0.390640832 | protein_coding   | X  | 16185604  | 16189587 MAGEB17   |
| ENSG00000182809 | 8.844740944 | 8.704198827 | protein_coding   | 14 | 105939299 | 105946499 CRIP2    |
| ENSG00000182810 | 7.648344073 | 7.82111279  | protein_coding   | 16 | 68055179  | 68057770 DDX28     |
| ENSG00000182814 | 1.799000381 | 0.390640832 | pseudogene       | 2  | 84517806  | 84519326 FUNDC2P2  |
| ENSG00000182827 | 9.190229706 | 9.318542753 | protein_coding   | 1  | 226332380 | 226374431 ACBD3    |
| ENSG00000182831 | 9.223526019 | 8.888724634 | protein_coding   | 16 | 9185537   | 9213536 C16orf72   |
| ENSG00000182836 | 0.499066092 | 0           | protein_coding   | 5  | 41307056  | 41510730 PLCXD3    |
| ENSG00000182841 | 7.115078652 | 7.346135265 | pseudogene       | 22 | 42951229  | 42978044           |
| ENSG00000182851 | 0.499066092 | 2.039052734 | protein_coding   | 8  | 144295068 | 144299044 GPIHBP1  |
| ENSG00000182853 | 2.238690726 | 1.518964905 | protein_coding   | 17 | 4688581   | 4689729 VMO1       |
| ENSG00000182858 | 8.433338631 | 8.319396705 | protein_coding   | 22 | 50296867  | 50312106 ALG12     |
| ENSG00000182866 | 2.238690726 | 0           | protein_coding   | 1  | 32716840  | 32751766 LCK       |
| ENSG00000182870 | 7.277615649 | 6.703819132 | protein_coding   | 12 | 132680924 | 132905935 GALNT9   |
| ENSG00000182871 | 9.62945337  | 9.905561226 | protein_coding   | 21 | 46825052  | 46933634 COL18A1   |
| ENSG00000182872 | 7.850461307 | 8.222087975 | protein_coding   | X  | 47004268  | 47046212 RBM10     |
| ENSG00000182873 | 6.204385613 | 5.751299057 | antisense        | 1  | 2113233   | 2115828            |
| ENSG00000182885 | 2.238690726 | 1.16600992  | protein_coding   | 16 | 57702099  | 57723975 GPR97     |
| ENSG00000182890 | 1.799000381 | 1.802319292 | protein_coding   | X  | 120181462 | 120183794 GLUD2    |
| ENSG00000182896 | 0.499066092 | 0           | protein_coding   | 17 | 7258442   | 7260538 TMEM95     |
| ENSG00000182899 | 11.5649357  | 11.98034419 | protein_coding   | 3  | 197676858 | 197683481 RPL35A   |
| ENSG00000182901 | 0           | 1.802319292 | protein_coding   | 1  | 240931554 | 241520530 RGS7     |
| ENSG00000182902 | 4.618121645 | 3.279072565 | protein_coding   | 22 | 18043139  | 18073647 SLC25A18  |
| ENSG00000182903 | 7.053569556 | 6.95589788  | protein_coding   | 4  | 419604    | 492945 ZNF721      |
| ENSG00000182909 | 7.110771062 | 6.819555981 | protein_coding   | 19 | 54972981  | 54974894 LENG9     |
| ENSG00000182912 | 6.103936836 | 6.149127429 | protein_coding   | 21 | 45937099  | 45945835 C21orf90  |
| ENSG00000182919 | 7.409722215 | 7.850567963 | protein_coding   | 11 | 93474757  | 93497915 C11orf54  |
| ENSG00000182923 | 7.19863491  | 7.577474828 | protein_coding   | 3  | 134204585 | 134293859 CEP63    |
| ENSG00000182931 | 2.35979773  | 4.29708397  | protein_coding   | 20 | 44313292  | 44333658 WFDC10B   |

|                 |             |             |                |    |           |           |           |
|-----------------|-------------|-------------|----------------|----|-----------|-----------|-----------|
| ENSG00000182934 | 11.05516955 | 11.04432742 | protein_coding | 11 | 126132833 | 126139039 | SRPR      |
| ENSG00000182944 | 11.56729548 | 11.40502138 | protein_coding | 22 | 29663998  | 29696515  | EWSR1     |
| ENSG00000182950 | 1.407729925 | 0.697730409 | protein_coding | 15 | 76016318  | 76020029  | ODF3L1    |
| ENSG00000182952 | 9.402463961 | 9.917208266 | protein_coding | 6  | 26538572  | 26547160  | HMGNA4    |
| ENSG00000182957 | 8.54291017  | 8.048254208 | protein_coding | 13 | 24734861  | 24896096  | SPATA13   |
| ENSG00000182963 | 8.600881464 | 8.490068116 | protein_coding | 17 | 42875816  | 42908179  | GJC1      |
| ENSG00000182965 | 0           | 0.697730409 | pseudogene     | 7  | 112160543 | 112161725 | NPM1P14   |
| ENSG00000182973 | 8.036821332 | 8.197845922 | protein_coding | 3  | 32726637  | 32815367  | CNOT10    |
| ENSG00000182979 | 9.3522601   | 9.401152631 | protein_coding | 14 | 105886157 | 105937066 | MTA1      |
| ENSG00000182985 | 7.115078652 | 9.511607983 | protein_coding | 11 | 115039938 | 115375675 | CADM1     |
| ENSG00000182986 | 8.803966282 | 8.958022094 | protein_coding | 19 | 53379425  | 53393592  | ZNF320    |
| ENSG00000182993 | 4.77879189  | 4.857374129 | protein_coding | 12 | 14956506  | 15059520  | C12orf60  |
| ENSG00000183010 | 10.60116605 | 10.77230949 | protein_coding | 17 | 79890269  | 79895161  | PYCR1     |
| ENSG00000183011 | 8.678607554 | 9.855105805 | protein_coding | 17 | 7760005   | 7761172   | LSMD1     |
| ENSG00000183016 | 0.869158192 | 0.390640832 | antisense      | 7  | 150887960 | 150902581 | IQCA1P1   |
| ENSG00000183018 | 5.270908378 | 7.754113435 | protein_coding | 17 | 4402129   | 4443228   | SPNS2     |
| ENSG00000183019 | 1.16343121  | 0.697730409 | protein_coding | 19 | 7741943   | 7744719   | C19orf59  |
| ENSG00000183020 | 9.633212506 | 9.448796166 | protein_coding | 11 | 924894    | 1012239   | AP2A2     |
| ENSG00000183022 | 0.499066092 | 0           | pseudogene     | 2  | 231437882 | 231438524 | TPM3P8    |
| ENSG00000183023 | 0           | 0.950786998 | protein_coding | 2  | 40339286  | 40838193  | SLC8A1    |
| ENSG00000183032 | 0.869158192 | 0.950786998 | protein_coding | 14 | 37147636  | 37642071  | SLC25A21  |
| ENSG00000183044 | 4.883502971 | 5.486957566 | protein_coding | 16 | 8768422   | 8878432   | ABAT      |
| ENSG00000183048 | 10.22779886 | 10.15809388 | protein_coding | 17 | 79670404  | 79688041  | MRPL12    |
| ENSG00000183049 | 8.790563466 | 7.929979971 | protein_coding | 10 | 12391481  | 12877545  | CAMK1D    |
| ENSG00000183055 | 0.499066092 | 1.353254395 | pseudogene     | 10 | 60475314  | 60476017  |           |
| ENSG00000183060 | 5.40360309  | 5.57429348  | protein_coding | 15 | 100255906 | 100273766 | LYSMD4    |
| ENSG00000183066 | 3.652182994 | 4.29708397  | protein_coding | 22 | 42394729  | 42454460  | WBP2NL    |
| ENSG00000183072 | 0           | 0.390640832 | protein_coding | 5  | 172659112 | 172662360 | NKX2-5    |
| ENSG00000183077 | 7.599989788 | 7.378849871 | protein_coding | 17 | 76183398  | 76203782  | AFMID     |
| ENSG00000183087 | 8.14188337  | 9.008548131 | protein_coding | 13 | 114523524 | 114567046 | GAS6      |
| ENSG00000183090 | 0           | 0.390640832 | protein_coding | 4  | 144498455 | 144621828 | FREM3     |
| ENSG00000183091 | 3.830412367 | 4.250702764 | protein_coding | 2  | 152341850 | 152591001 | NEB       |
| ENSG00000183092 | 5.909333162 | 4.406904905 | protein_coding | 14 | 101003486 | 101053750 | BEGAIN    |
| ENSG00000183098 | 5.498982484 | 6.50081754  | protein_coding | 13 | 93879095  | 95055812  | GPC6      |
| ENSG00000183111 | 4.062237333 | 3.608232228 | protein_coding | 5  | 148931510 | 149014531 | ARHGEF37  |
| ENSG00000183128 | 3.146112541 | 3.368666104 | protein_coding | 10 | 105232561 | 105238997 | CALHM3    |
| ENSG00000183134 | 3.077135474 | 2.912743273 | protein_coding | 11 | 60618413  | 60623444  | PTGDR2    |
| ENSG00000183137 | 6.414691513 | 6.525377513 | protein_coding | 6  | 109416313 | 109485135 | CEP57L1   |
| ENSG00000183150 | 4.883502971 | 5.163066621 | protein_coding | 12 | 12813825  | 12849141  | GPR19     |
| ENSG00000183153 | 4.292665995 | 3.679994897 | protein_coding | 17 | 38517235  | 38520067  | GJD3      |
| ENSG00000183154 | 0           | 0.390640832 | protein_coding | 8  | 37592279  | 37594944  |           |
| ENSG00000183155 | 6.856698814 | 7.258020107 | protein_coding | 1  | 202848085 | 202858263 | RABIF     |
| ENSG00000183160 | 2.238690726 | 2.242360793 | protein_coding | 12 | 108983622 | 108992096 | TMEM119   |
| ENSG00000183161 | 6.814942123 | 6.862599506 | protein_coding | 11 | 22644079  | 22647387  | FANCF     |
| ENSG00000183171 | 1.616589159 | 1.353254395 | pseudogene     | X  | 149282609 | 149284751 |           |
| ENSG00000183172 | 7.323008624 | 7.76240224  | protein_coding | 22 | 42475695  | 42532261  | C22orf32  |
| ENSG00000183186 | 3.698846687 | 4.226940739 | protein_coding | 19 | 405443    | 409170    | C2CD4C    |
| ENSG00000183196 | 6.598204782 | 4.777836593 | protein_coding | 16 | 75510949  | 75529282  | CHST6     |
| ENSG00000183199 | 4.026095388 | 3.027231696 | pseudogene     | 4  | 88812995  | 88815167  | HSP90AB3P |
| ENSG00000183206 | 0           | 1.16600992  | protein_coding | 18 | 14507338  | 14543599  | POTEC     |
| ENSG00000183207 | 10.81418283 | 10.92248464 | protein_coding | 19 | 49497156  | 49519182  | RUVBL2    |
| ENSG00000183208 | 4.642199401 | 4.528525526 | protein_coding | 15 | 90777040  | 90785315  | C15orf58  |
| ENSG00000183239 | 0.869158192 | 0.950786998 | pseudogene     | 6  | 44056979  | 44057433  |           |
| ENSG00000183246 | 0.869158192 | 0.390640832 | protein_coding | 22 | 21899646  | 21905750  | RIMBP3C   |
| ENSG00000183248 | 4.062237333 | 2.242360793 | protein_coding | 19 | 7933605   | 7939326   |           |
| ENSG00000183250 | 4.6658819   | 3.570966319 | protein_coding | 21 | 46352729  | 46359828  | C21orf67  |
| ENSG00000183251 | 0.499066092 | 0.697730409 | protein_coding | 11 | 5322244   | 5323226   | OR51B4    |
| ENSG00000183255 | 11.29093363 | 11.25044641 | protein_coding | 21 | 46269500  | 46293752  | PTTG1IP   |
| ENSG00000183258 | 9.446713374 | 9.474880612 | protein_coding | 5  | 176938578 | 176944470 | DDX41     |
| ENSG00000183260 | 6.068837212 | 6.847095496 | protein_coding | 20 | 62492566  | 62494341  | ABHD16B   |
| ENSG00000183281 | 3.448790144 | 3.570966319 | protein_coding | 2  | 87229682  | 87248975  | PLGLB1    |
| ENSG00000183283 | 10.94938384 | 10.75059971 | protein_coding | 12 | 51632076  | 51640501  | DAZAP2    |
| ENSG00000183287 | 7.778963161 | 6.403479675 | protein_coding | 18 | 57102442  | 57364574  | CCBE1     |

|                 |             |             |                  |    |           |                      |
|-----------------|-------------|-------------|------------------|----|-----------|----------------------|
| ENSG00000183291 | 9.56636357  | 9.864761738 | protein_coding   | 1  | 87328132  | 87380107             |
| ENSG00000183298 | 2.238690726 | 2.144285137 | pseudogene       | 1  | 102251892 | 102254059            |
| ENSG00000183307 | 3.004694206 | 3.133298822 | protein_coding   | 22 | 17597189  | 17602257 CECR6       |
| ENSG00000183308 | 0           | 0.390640832 | antisense        | 2  | 201827986 | 201873825            |
| ENSG00000183309 | 7.751556534 | 7.758263791 | protein_coding   | 8  | 144718183 | 144738588 ZNF623     |
| ENSG00000183317 | 5.986594255 | 5.784235782 | protein_coding   | 1  | 38179552  | 38230805 EPHA10      |
| ENSG00000183323 | 6.820228284 | 6.720932357 | protein_coding   | 5  | 68576002  | 68628636 CCDC125     |
| ENSG00000183324 | 0.869158192 | 0.697730409 | protein_coding   | 15 | 73735499  | 73852355 C15orf60    |
| ENSG00000183337 | 9.522446643 | 9.333223486 | protein_coding   | X  | 39909068  | 40036582 BCOR        |
| ENSG00000183340 | 7.04456449  | 7.593823731 | protein_coding   | 11 | 96123153  | 96240738 JRKL        |
| ENSG00000183346 | 0.499066092 | 1.518964905 | protein_coding   | 10 | 63422719  | 63526524 C10orf107   |
| ENSG00000183347 | 0           | 0.390640832 | protein_coding   | 1  | 89829605  | 89853719 GBP6        |
| ENSG00000183354 | 6.548110424 | 6.398170093 | protein_coding   | 9  | 5881596   | 6007901 KIAA2026     |
| ENSG00000183378 | 0           | 0.390640832 | polymorphic_pse  | 11 | 7710669   | 7727968 OVCH2        |
| ENSG00000183379 | 3.077135474 | 2.851901313 | protein_coding   | 14 | 74872596  | 74892805 SYNDIG1L    |
| ENSG00000183386 | 8.173205795 | 8.410554709 | protein_coding   | 1  | 38462442  | 38471278 FHL3        |
| ENSG00000183395 | 1.16343121  | 0.697730409 | protein_coding   | 12 | 102590237 | 102591623 PMCH       |
| ENSG00000183396 | 1.960915222 | 1.518964905 | protein_coding   | 3  | 48658192  | 48659288 TMEM89      |
| ENSG00000183397 | 7.19863491  | 7.281279771 | protein_coding   | 19 | 3539155   | 3544028 C19orf71     |
| ENSG00000183401 | 5.763291843 | 6.505763096 | protein_coding   | 19 | 11457181  | 11465619 CCDC159     |
| ENSG00000183405 | 4.131913373 | 4.15321211  | pseudogene       | 17 | 26794814  | 26795460 RPS7P1      |
| ENSG00000183421 | 9.614318105 | 8.517261232 | protein_coding   | 21 | 43159529  | 43187266 RIPK4       |
| ENSG00000183423 | 1.16343121  | 3.027231696 | protein_coding   | 4  | 110772486 | 110793471 LRIT3      |
| ENSG00000183426 | 4.923348194 | 5.57429348  | protein_coding   | 16 | 14844670  | 15045931 NPIP        |
| ENSG00000183431 | 9.988771077 | 10.1446815  | protein_coding   | 1  | 38422647  | 38456593 SF3A3       |
| ENSG00000183439 | 4.026095388 | 4.744751758 | protein_coding   | 4  | 165875598 | 165898820 TRIM61     |
| ENSG00000183444 | 4.842525946 | 5.059245468 | pseudogene       | 7  | 97595402  | 97596335             |
| ENSG00000183454 | 3.950976309 | 5.709041716 | protein_coding   | 16 | 9852376   | 10276611 GRIN2A      |
| ENSG00000183458 | 5.158541613 | 5.564846512 | pseudogene       | 16 | 15005408  | 15029565             |
| ENSG00000183461 | 0           | 1.802319292 | protein_coding   | X  | 52511761  | 52516905 XAGE1C      |
| ENSG00000183473 | 0.499066092 | 1.16600992  | protein_coding   | 22 | 37600278  | 37608362 SSTR3       |
| ENSG00000183474 | 6.014532757 | 5.784235782 | protein_coding   | 5  | 68856035  | 68890550 GTF2H2C     |
| ENSG00000183475 | 6.965663283 | 6.866449614 | protein_coding   | 15 | 101142739 | 101191910 ASB7       |
| ENSG00000183476 | 0           | 0.390640832 | protein_coding   | 15 | 78370150  | 78397251 SH2D7       |
| ENSG00000183479 | 4.381167248 | 3.679994897 | protein_coding   | X  | 152710178 | 152736045 TREX2      |
| ENSG00000183484 | 4.962122459 | 3.183544561 | protein_coding   | 14 | 105515728 | 105531782 GPR132     |
| ENSG00000183486 | 7.527512071 | 8.106387334 | protein_coding   | 21 | 42733870  | 45746674 MX2         |
| ENSG00000183495 | 10.46605656 | 10.33071191 | protein_coding   | 12 | 132434505 | 132565005 EP400      |
| ENSG00000183496 | 4.491309013 | 5.57429348  | protein_coding   | 15 | 82334119  | 82338482 MEX3B       |
| ENSG00000183506 | 6.393570237 | 6.539915281 | pseudogene       | 22 | 21827289  | 21871822 PI4KAP2     |
| ENSG00000183508 | 6.393570237 | 6.24096575  | protein_coding   | 1  | 118148556 | 118170994 FAM46C     |
| ENSG00000183513 | 7.311793575 | 7.373448694 | protein_coding   | 2  | 99215773  | 99224978 COA5        |
| ENSG00000183520 | 8.492479328 | 8.578395649 | protein_coding   | 1  | 38474930  | 38490496 UTP11L      |
| ENSG00000183527 | 8.568265199 | 8.853271458 | protein_coding   | 21 | 40546695  | 40555777 PSMG1       |
| ENSG00000183530 | 10.4388224  | 10.17060441 | protein_coding   | 22 | 32072242  | 32146126 PRR14L      |
| ENSG00000183535 | 1.16343121  | 2.334191469 | processed_transc | 21 | 46839631  | 46844985 COL18A1-AS1 |
| ENSG00000183542 | 0           | 1.353254395 | protein_coding   | 12 | 10559983  | 10562356 KLRC4       |
| ENSG00000183558 | 2.57521082  | 3.748356452 | protein_coding   | 1  | 149813505 | 149814478 HIST2H2AA3 |
| ENSG00000183562 | 2.10647801  | 2.420525079 | protein_coding   | 11 | 3011093   | 3012563              |
| ENSG00000183569 | 5.695874189 | 5.564846512 | protein_coding   | 22 | 42949623  | 42970388 SERHL2      |
| ENSG00000183570 | 5.563445526 | 6.077857763 | protein_coding   | 21 | 47063608  | 47362368 PCBP3       |
| ENSG00000183571 | 0           | 0.697730409 | protein_coding   | 15 | 99511459  | 99551024 PGPEP1L     |
| ENSG00000183576 | 9.775389681 | 8.862939634 | protein_coding   | 14 | 99864083  | 99947216 SETD3       |
| ENSG00000183578 | 4.437288965 | 4.363974406 | protein_coding   | 15 | 51348795  | 51397473 TNFAIP8L3   |
| ENSG00000183579 | 8.724437638 | 8.193254836 | protein_coding   | 22 | 29279580  | 29453475 ZNRF3       |
| ENSG00000183580 | 0           | 0.390640832 | protein_coding   | 5  | 15500305  | 15939900 FBXL7       |
| ENSG00000183597 | 8.116326397 | 8.099860884 | protein_coding   | 22 | 20004537  | 20053449 C22orf25    |
| ENSG00000183604 | 2.671945279 | 3.133298822 | pseudogene       | 16 | 30234230  | 30346695             |
| ENSG00000183605 | 7.993024472 | 8.262094789 | protein_coding   | 10 | 120900279 | 120925179 SFXN4      |
| ENSG00000183615 | 3.989024711 | 5.059245468 | protein_coding   | 1  | 32712834  | 32714457 FAM167B     |
| ENSG00000183617 | 8.329659793 | 9.179226353 | protein_coding   | 19 | 3762665   | 3767562 MRPL54       |
| ENSG00000183621 | 6.496213887 | 7.370740503 | protein_coding   | 10 | 31133563  | 31320866 ZNF438      |
| ENSG00000183624 | 9.248248601 | 8.775550005 | protein_coding   | 3  | 128997671 | 129024146 C3orf37    |

|                 |             |             |                  |    |           |           |           |
|-----------------|-------------|-------------|------------------|----|-----------|-----------|-----------|
| ENSG00000183625 | 1.960915222 | 0.697730409 | protein_coding   | 3  | 46205096  | 46308197  | CCR3      |
| ENSG00000183628 | 5.239686603 | 5.974624386 | protein_coding   | 22 | 18893541  | 18901751  | DGCR6     |
| ENSG00000183629 | 1.407729925 | 1.16600992  | protein_coding   | 15 | 28764757  | 28778160  | GOLGA8G   |
| ENSG00000183638 | 3.830412367 | 3.232099092 | protein_coding   | 8  | 10463859  | 10569697  | RP1L1     |
| ENSG00000183647 | 6.830742851 | 6.387491945 | protein_coding   | 19 | 58111253  | 58119637  | ZNF530    |
| ENSG00000183648 | 7.30049066  | 6.980975423 | protein_coding   | 14 | 92582466  | 92588261  | NDUFB1    |
| ENSG00000183655 | 6.462804234 | 6.419292172 | protein_coding   | 15 | 86302554  | 86338261  | KLHL25    |
| ENSG00000183657 | 4.230497448 | 3.32456471  | protein_coding   | 3  | 171509580 | 171527714 |           |
| ENSG00000183665 | 7.281453427 | 7.48283249  | protein_coding   | 8  | 125463048 | 125474391 | TRMT12    |
| ENSG00000183666 | 5.60078458  | 5.47691899  | pseudogene       | 5  | 21341942  | 21544886  |           |
| ENSG00000183668 | 2.762599152 | 2.579085888 | protein_coding   | 19 | 43757434  | 43773682  | PSG9      |
| ENSG00000183671 | 3.830412367 | 4.489113623 | protein_coding   | 2  | 207040040 | 207082771 | GPR1      |
| ENSG00000183674 | 1.616589159 | 2.242360793 | processed_transc | 6  | 10429488  | 10435107  | LINC00518 |
| ENSG00000183682 | 1.960915222 | 2.721932731 | protein_coding   | 1  | 39957318  | 39991607  | BMP8A     |
| ENSG00000183684 | 9.776069902 | 9.695451059 | protein_coding   | 17 | 79845713  | 79849462  | ALYREF    |
| ENSG00000183688 | 9.360447332 | 9.740202333 | protein_coding   | 17 | 289769    | 295730    | FAM101B   |
| ENSG00000183690 | 4.942865586 | 4.528525526 | protein_coding   | X  | 44007128  | 44202923  | EFHC2     |
| ENSG00000183691 | 8.002356002 | 8.632529738 | protein_coding   | 17 | 54671060  | 54672951  | NOG       |
| ENSG00000183696 | 10.75847887 | 10.11059465 | protein_coding   | 7  | 48128225  | 48148330  | UPP1      |
| ENSG00000183718 | 5.588445295 | 6.057793599 | protein_coding   | 5  | 180681417 | 180688119 | TRIM52    |
| ENSG00000183722 | 6.585843317 | 6.668971382 | protein_coding   | 13 | 39917029  | 40177665  | LHFP      |
| ENSG00000183723 | 8.831713317 | 8.605140645 | protein_coding   | 16 | 66648653  | 66730610  | CMTM4     |
| ENSG00000183726 | 9.16240384  | 9.519576271 | protein_coding   | 1  | 25664408  | 25688852  | TMEM50A   |
| ENSG00000183729 | 1.799000381 | 1.16600992  | protein_coding   | 8  | 53850991  | 53853677  | NPBWR1    |
| ENSG00000183735 | 8.193715877 | 8.320800493 | protein_coding   | 12 | 64845660  | 64895888  | TBK1      |
| ENSG00000183741 | 11.3653694  | 11.01275647 | protein_coding   | 22 | 39257455  | 39268319  | CBX6      |
| ENSG00000183742 | 2.35979773  | 0           | protein_coding   | 7  | 20176020  | 20257027  | MACC1     |
| ENSG00000183751 | 10.37065269 | 10.36683522 | protein_coding   | 16 | 2022038   | 2032934   | TBL3      |
| ENSG00000183760 | 3.652182994 | 3.279072565 | protein_coding   | 19 | 39574945  | 39602080  |           |
| ENSG00000183762 | 8.759256101 | 7.641787375 | protein_coding   | 22 | 29469066  | 29564321  | KREMEN1   |
| ENSG00000183763 | 6.979904289 | 7.243290054 | protein_coding   | 3  | 49866034  | 49894007  | TRAIP     |
| ENSG00000183765 | 8.684416567 | 8.995422414 | protein_coding   | 22 | 29083731  | 29138410  | CHEK2     |
| ENSG00000183770 | 5.588445295 | 5.404622322 | protein_coding   | 3  | 138663066 | 138665982 | FOXL2     |
| ENSG00000183773 | 3.911897206 | 3.183544561 | protein_coding   | 22 | 21319396  | 21335649  | AIFM3     |
| ENSG00000183775 | 1.407729925 | 1.518964905 | protein_coding   | 5  | 143550396 | 143856944 | KCTD16    |
| ENSG00000183778 | 1.16343121  | 0           | protein_coding   | 21 | 40928369  | 41034816  | B3GALT5   |
| ENSG00000183779 | 7.55947245  | 7.103479673 | protein_coding   | 8  | 37553269  | 37557537  | ZNF703    |
| ENSG00000183785 | 1.616589159 | 1.16600992  | protein_coding   | 22 | 18593097  | 18614498  | TUBA8     |
| ENSG00000183791 | 0           | 1.16600992  | protein_coding   | 18 | 44554573  | 44556449  | TCEB3C    |
| ENSG00000183793 | 0.499066092 | 0.950786998 | protein_coding   | 16 | 15457516  | 15474904  |           |
| ENSG00000183798 | 0.869158192 | 1.925536307 | protein_coding   | 20 | 39988606  | 39995467  | EMILIN3   |
| ENSG00000183801 | 0           | 1.353254395 | protein_coding   | 11 | 7506619   | 7532608   | OLFML1    |
| ENSG00000183808 | 7.81647827  | 7.862183683 | protein_coding   | 8  | 94741584  | 94753245  | RBM12B    |
| ENSG00000183813 | 1.407729925 | 1.802319292 | protein_coding   | 3  | 32993066  | 32997841  | CCR4      |
| ENSG00000183814 | 6.75547892  | 7.138927266 | protein_coding   | 1  | 226418850 | 226497570 | LIN9      |
| ENSG00000183826 | 6.335686705 | 6.520498852 | protein_coding   | 6  | 38136227  | 38607924  | BTBD9     |
| ENSG00000183828 | 6.979904289 | 6.480864016 | protein_coding   | 14 | 105639275 | 105647660 | NUDT14    |
| ENSG00000183831 | 0.499066092 | 0           | protein_coding   | 1  | 173578700 | 173639001 | ANKRD45   |
| ENSG00000183833 | 5.684325135 | 6.2290532   | protein_coding   | 3  | 119421869 | 119485949 | C3orf15   |
| ENSG00000183840 | 5.938793061 | 4.841813558 | protein_coding   | 2  | 133174147 | 133404132 | GPR39     |
| ENSG00000183844 | 0.499066092 | 1.518964905 | protein_coding   | 21 | 42676139  | 42729358  | FAM3B     |
| ENSG00000183850 | 4.517578978 | 4.585695337 | protein_coding   | 19 | 23299777  | 23332763  | ZNF730    |
| ENSG00000183853 | 11.56591941 | 11.75615959 | protein_coding   | 1  | 157963063 | 158070052 | KIRREL    |
| ENSG00000183856 | 10.58572949 | 10.90994789 | protein_coding   | 1  | 156495197 | 156542396 | IQGAP3    |
| ENSG00000183864 | 9.828162765 | 9.747527757 | protein_coding   | 22 | 41829496  | 41843027  | TOB2      |
| ENSG00000183873 | 0           | 0.950786998 | protein_coding   | 3  | 38589548  | 38691164  | SCN5A     |
| ENSG00000183876 | 5.763291843 | 5.611474642 | protein_coding   | 5  | 149675906 | 149718870 | ARSI      |
| ENSG00000183889 | 1.407729925 | 1.802319292 | protein_coding   | 16 | 16411301  | 16444447  |           |
| ENSG00000183891 | 5.417620896 | 5.236305879 | protein_coding   | 2  | 20096404  | 20101747  | TTC32     |
| ENSG00000183900 | 0           | 1.925536307 | pseudogene       | 5  | 72742083  | 72744352  |           |
| ENSG00000183908 | 0           | 0.697730409 | protein_coding   | 11 | 56949221  | 56959191  | LRRCS5    |
| ENSG00000183911 | 0.499066092 | 0.697730409 | pseudogene       | X  | 100594905 | 100595922 | RPL21P132 |
| ENSG00000183914 | 10.58378825 | 9.974965329 | protein_coding   | 17 | 7623039   | 7737058   | DNAH2     |



|                 |             |             |                  |    |           |           |           |
|-----------------|-------------|-------------|------------------|----|-----------|-----------|-----------|
| ENSG00000183929 | 6.068837212 | 6.563824016 | pseudogene       | 1  | 228744885 | 228788150 | DUSP5P    |
| ENSG00000183935 | 3.554067925 | 3.133298822 | pseudogene       | 12 | 13152812  | 13157764  | HTR7P1    |
| ENSG00000183943 | 8.023133844 | 7.760334499 | protein_coding   | X  | 3522411   | 3631649   | PRKX      |
| ENSG00000183955 | 8.577659618 | 8.500015927 | protein_coding   | 12 | 123868320 | 123893905 | SETD8     |
| ENSG00000183963 | 10.59578202 | 10.42117962 | protein_coding   | 22 | 31460091  | 31500610  | SMTN      |
| ENSG00000183971 | 2.35979773  | 1.16600992  | protein_coding   | 16 | 2059927   | 2070756   | NPW       |
| ENSG00000183977 | 2.671945279 | 2.334191469 | protein_coding   | 3  | 20021453  | 20053822  | PP2D1     |
| ENSG00000183978 | 7.413224588 | 8.170077662 | protein_coding   | 17 | 40949653  | 40950704  | CCDC56    |
| ENSG00000183979 | 2.10647801  | 1.925536307 | protein_coding   | 17 | 79860072  | 79860780  | NPB       |
| ENSG00000184007 | 11.19143908 | 10.87143099 | protein_coding   | 1  | 32372022  | 32410457  | PTP4A2    |
| ENSG00000184009 | 15.11695939 | 14.776564   | protein_coding   | 17 | 79476999  | 79479827  | ACTG1     |
| ENSG00000184012 | 6.103936836 | 5.840125386 | protein_coding   | 21 | 42836478  | 42903043  | TMPRSS2   |
| ENSG00000184014 | 10.43796299 | 10.78431559 | protein_coding   | 11 | 9160372   | 9286937   | DENND5A   |
| ENSG00000184047 | 5.774228067 | 5.908941696 | protein_coding   | 12 | 122692210 | 122712081 | DIABLO    |
| ENSG00000184056 | 7.471499737 | 7.57041104  | protein_coding   | 15 | 91541646  | 91565833  | VPS33B    |
| ENSG00000184058 | 2.847891871 | 1.802319292 | protein_coding   | 22 | 19744226  | 19771116  | TBX1      |
| ENSG00000184060 | 0.869158192 | 1.925536307 | protein_coding   | 17 | 29248698  | 29286340  | ADAP2     |
| ENSG00000184068 | 6.236372259 | 5.506827567 | processed_transc | 22 | 42227219  | 42230669  |           |
| ENSG00000184076 | 9.807683852 | 10.37022883 | protein_coding   | 22 | 30163352  | 30166402  | UQCR10    |
| ENSG00000184083 | 8.464056506 | 9.103767504 | protein_coding   | X  | 54094757  | 54209714  | FAM120C   |
| ENSG00000184084 | 0           | 1.16600992  | pseudogene       | 5  | 73099121  | 73099424  |           |
| ENSG00000184100 | 1.16343121  | 1.667587519 | pseudogene       | 3  | 159818478 | 159820661 |           |
| ENSG00000184108 | 0           | 0.390640832 | protein_coding   | 4  | 189060573 | 189068897 | TRIML1    |
| ENSG00000184110 | 6.407685389 | 6.926693689 | protein_coding   | 16 | 28699879  | 28747051  | EIF3C     |
| ENSG00000184111 | 0.499066092 | 0.697730409 | pseudogene       | 10 | 94356609  | 94357044  |           |
| ENSG00000184113 | 2.671945279 | 2.851901313 | protein_coding   | 22 | 19510547  | 19515068  | CLDN5     |
| ENSG00000184117 | 10.64390259 | 10.54945594 | protein_coding   | 22 | 29950797  | 29977326  | NIPSNAP1  |
| ENSG00000184144 | 0           | 0.697730409 | protein_coding   | 1  | 205012325 | 205047627 | CNTN2     |
| ENSG00000184154 | 6.188122351 | 6.174194902 | protein_coding   | 11 | 71791382  | 71821828  | LRTOMT    |
| ENSG00000184156 | 1.16343121  | 0           | protein_coding   | 8  | 133139193 | 133493200 | KCNQ3     |
| ENSG00000184160 | 4.322773689 | 4.101879561 | protein_coding   | 4  | 3768075   | 3770251   | ADRA2C    |
| ENSG00000184162 | 8.394884042 | 8.673761454 | protein_coding   | 19 | 19312224  | 19314220  | NR2C2AP   |
| ENSG00000184163 | 4.409500985 | 5.339632724 | protein_coding   | 1  | 1177826   | 1182102   | FAM132A   |
| ENSG00000184164 | 8.487504052 | 8.924251218 | protein_coding   | 22 | 50311815  | 50321188  | CRELD2    |
| ENSG00000184178 | 7.811178326 | 7.637287497 | protein_coding   | 4  | 53739149  | 54232242  | SCFD2     |
| ENSG00000184182 | 7.326727684 | 7.119700263 | protein_coding   | 2  | 238875469 | 238951236 | UBE2F     |
| ENSG00000184185 | 6.598204782 | 7.8660349   | protein_coding   | 17 | 21279699  | 21320404  | KCNJ12    |
| ENSG00000184188 | 0.499066092 | 0.390640832 | pseudogene       | 5  | 79595497  | 79598666  |           |
| ENSG00000184194 | 5.141750194 | 6.167968749 | protein_coding   | X  | 53078273  | 53109797  | GPR173    |
| ENSG00000184203 | 8.396654395 | 8.206984494 | protein_coding   | 3  | 195241221 | 195270209 | PPP1R2    |
| ENSG00000184205 | 8.599344916 | 8.410554709 | protein_coding   | X  | 53111549  | 53117722  | TSPYL2    |
| ENSG00000184206 | 1.799000381 | 1.925536307 | protein_coding   | 15 | 84904525  | 84914120  | GOLGA6L4  |
| ENSG00000184207 | 8.717371959 | 8.741364159 | protein_coding   | 16 | 2261998   | 2264808   | PGP       |
| ENSG00000184208 | 7.930852348 | 8.42106413  | protein_coding   | 22 | 42084943  | 42094140  | C22orf46  |
| ENSG00000184209 | 6.640654398 | 6.544728831 | protein_coding   | 12 | 123942188 | 123957701 | SNRNP35   |
| ENSG00000184210 | 0.499066092 | 0.697730409 | protein_coding   | X  | 69397333  | 69425395  | DGAT2L6   |
| ENSG00000184216 | 12.00056824 | 11.37931557 | protein_coding   | X  | 153275951 | 153285431 | IRAK1     |
| ENSG00000184220 | 8.814599602 | 8.849385973 | protein_coding   | 3  | 99536678  | 99897447  | C3orf26   |
| ENSG00000184224 | 1.616589159 | 0.390640832 | protein_coding   | 11 | 67370351  | 67374177  | C11orf72  |
| ENSG00000184226 | 1.407729925 | 1.16600992  | protein_coding   | 13 | 66876967  | 67804468  | PCDH9     |
| ENSG00000184227 | 4.77879189  | 5.294620694 | protein_coding   | 14 | 74003818  | 74010498  | ACOT1     |
| ENSG00000184232 | 10.82276754 | 10.42183387 | protein_coding   | 11 | 120081475 | 120101001 | OAF       |
| ENSG00000184247 | 5.995967334 | 5.593003837 | pseudogene       | 17 | 77910551  | 77910992  |           |
| ENSG00000184254 | 6.9512803   | 6.002883551 | protein_coding   | 15 | 101402129 | 101456831 | ALDH1A3   |
| ENSG00000184258 | 1.16343121  | 0.950786998 | protein_coding   | X  | 139865425 | 139866723 | CDR1      |
| ENSG00000184260 | 2.238690726 | 3.64455972  | protein_coding   | 1  | 149858525 | 149858961 | HIST2H2AC |
| ENSG00000184261 | 1.407729925 | 1.353254395 | protein_coding   | 2  | 47747910  | 47798078  | KCNK12    |
| ENSG00000184270 | 0.869158192 | 0.950786998 | protein_coding   | 1  | 149859019 | 149859466 | HIST2H2AB |
| ENSG00000184271 | 6.489593565 | 6.460630645 | protein_coding   | 12 | 51580719  | 51611477  | POU6F1    |
| ENSG00000184274 | 1.407729925 | 2.144285137 | lincRNA          | 21 | 46720160  | 46725172  | LINC00315 |
| ENSG00000184277 | 7.053569556 | 7.688207601 | protein_coding   | 15 | 102161847 | 102192594 | TM2D3     |
| ENSG00000184281 | 8.856366065 | 8.971490926 | protein_coding   | 11 | 2421718   | 2425106   | TSSC4     |
| ENSG00000184292 | 10.15958131 | 9.554600493 | protein_coding   | 1  | 59041099  | 59043166  | TACSTD2   |

|                 |             |             |                  |    |           |           |           |
|-----------------|-------------|-------------|------------------|----|-----------|-----------|-----------|
| ENSG00000184302 | 0.499066092 | 0           | protein_coding   | 14 | 60975669  | 60979568  | SIX6      |
| ENSG00000184304 | 4.437288965 | 7.357122767 | protein_coding   | 14 | 30045687  | 30661104  | PRKD1     |
| ENSG00000184305 | 1.799000381 | 0           | protein_coding   | 4  | 91048686  | 92523064  | FAM190A   |
| ENSG00000184307 | 6.041940478 | 6.365895578 | protein_coding   | 3  | 113666748 | 113684248 | ZDHC23    |
| ENSG00000184313 | 2.238690726 | 1.802319292 | protein_coding   | 1  | 55107459  | 55207981  | HEATR8    |
| ENSG00000184319 | 6.290697143 | 6.89311646  | pseudogene       | 22 | 51195376  | 51239737  |           |
| ENSG00000184343 | 4.097495944 | 4.547834947 | protein_coding   | X  | 153041867 | 153051187 | SRPK3     |
| ENSG00000184347 | 0           | 0.390640832 | protein_coding   | 5  | 168088745 | 168728133 | SLIT3     |
| ENSG00000184348 | 2.35979773  | 2.420525079 | protein_coding   | 6  | 27805658  | 27806117  | HIST1H2AK |
| ENSG00000184349 | 7.865879816 | 7.534563804 | protein_coding   | 5  | 106712590 | 107006596 | EFNA5     |
| ENSG00000184357 | 3.146112541 | 3.781359661 | protein_coding   | 6  | 27834570  | 27835359  | HIST1H1B  |
| ENSG00000184361 | 1.960915222 | 0.950786998 | protein_coding   | 17 | 43331760  | 43339479  | C17orf46  |
| ENSG00000184363 | 10.10106595 | 9.035301979 | protein_coding   | 11 | 392614    | 404908    | PKP3      |
| ENSG00000184368 | 2.928422289 | 1.353254395 | protein_coding   | X  | 20024831  | 20135114  | MAP7D2    |
| ENSG00000184371 | 11.05936676 | 11.12367977 | protein_coding   | 1  | 110452864 | 110473614 | CSF1      |
| ENSG00000184374 | 0           | 0.697730409 | protein_coding   | 8  | 120007691 | 120118821 | COLEC10   |
| ENSG00000184378 | 5.255381949 | 5.840125386 | protein_coding   | 3  | 169484713 | 169487683 |           |
| ENSG00000184381 | 7.484876093 | 7.598461017 | protein_coding   | 22 | 38507502  | 38588107  | PLA2G6    |
| ENSG00000184384 | 7.921045056 | 8.375860541 | protein_coding   | 11 | 95709762  | 96076382  | MAML2     |
| ENSG00000184389 | 0.499066092 | 0.697730409 | pseudogene       | 1  | 33772367  | 33778491  | A3GALT2P  |
| ENSG00000184402 | 7.985986001 | 8.251828705 | protein_coding   | 20 | 60718822  | 60757540  | SS18L1    |
| ENSG00000184408 | 0           | 0.390640832 | protein_coding   | 7  | 119913722 | 120390385 | KCND2     |
| ENSG00000184414 | 1.407729925 | 0.390640832 | pseudogene       | 7  | 100167754 | 100168759 |           |
| ENSG00000184428 | 8.586993258 | 8.106387334 | protein_coding   | 8  | 144386554 | 144442149 | TOP1MT    |
| ENSG00000184432 | 11.20008193 | 11.24620466 | protein_coding   | 3  | 139074442 | 139108574 | COPB2     |
| ENSG00000184434 | 1.16343121  | 1.518964905 | protein_coding   | 9  | 26993134  | 27005691  | LRRIC19   |
| ENSG00000184436 | 7.8607586   | 8.351343215 | protein_coding   | 22 | 21353393  | 21356485  | THAP7     |
| ENSG00000184441 | 5.223818625 | 5.446377228 | processed_transc | 21 | 45751117  | 45755734  |           |
| ENSG00000184445 | 8.922987828 | 8.98660512  | protein_coding   | 12 | 123011793 | 123110926 | KNTC1     |
| ENSG00000184451 | 3.393122761 | 3.993387124 | protein_coding   | 17 | 40830907  | 40833861  | CCR10     |
| ENSG00000184459 | 0           | 0.697730409 | protein_coding   | 22 | 32809834  | 32860471  | BPIFC     |
| ENSG00000184465 | 8.116326397 | 8.301022059 | protein_coding   | 6  | 169857307 | 170102159 | WDR27     |
| ENSG00000184470 | 8.546104025 | 9.007676788 | protein_coding   | 22 | 19863040  | 19929359  | TXNRD2    |
| ENSG00000184471 | 0.499066092 | 0           | protein_coding   | 16 | 1140005   | 1146244   | C1QTNF8   |
| ENSG00000184481 | 6.809636522 | 7.392265003 | protein_coding   | X  | 70316047  | 70323385  | FOXO4     |
| ENSG00000184486 | 0.869158192 | 1.16600992  | protein_coding   | 6  | 99282580  | 99286660  | POU3F2    |
| ENSG00000184489 | 7.19863491  | 6.703819132 | protein_coding   | 8  | 142402093 | 142441620 | PTP4A3    |
| ENSG00000184492 | 1.616589159 | 1.353254395 | protein_coding   | 2  | 114256661 | 114258728 | FOXD4L1   |
| ENSG00000184497 | 5.858855738 | 6.155435249 | protein_coding   | 13 | 114462216 | 114514926 | FAM70B    |
| ENSG00000184500 | 6.912209543 | 8.270836518 | protein_coding   | 3  | 93591881  | 93692910  | PROS1     |
| ENSG00000184507 | 1.960915222 | 1.353254395 | protein_coding   | 15 | 34635516  | 34649938  | C15orf55  |
| ENSG00000184508 | 3.335220907 | 4.961837817 | protein_coding   | 15 | 91474148  | 91475799  | HDDC3     |
| ENSG00000184515 | 3.274897671 | 1.353254395 | protein_coding   | X  | 101408680 | 101411029 | BEX5      |
| ENSG00000184517 | 7.587643674 | 7.73107057  | protein_coding   | 16 | 75182390  | 75206134  | ZFP1      |
| ENSG00000184524 | 1.407729925 | 2.912743273 | protein_coding   | 11 | 787104    | 790123    | CEND1     |
| ENSG00000184530 | 3.211941663 | 4.872768657 | protein_coding   | 6  | 127840600 | 127912962 | C6orf58   |
| ENSG00000184545 | 7.115078652 | 7.343375265 | protein_coding   | 11 | 1575274   | 1593150   | DUSP8     |
| ENSG00000184551 | 6.522395495 | 5.816437314 | pseudogene       | 17 | 80206943  | 80209703  |           |
| ENSG00000184557 | 8.124895791 | 6.915587884 | protein_coding   | 17 | 76352864  | 76356158  | SOCS3     |
| ENSG00000184560 | 1.407729925 | 2.144285137 | protein_coding   | 17 | 7328935   | 7330884   | C17orf74  |
| ENSG00000184564 | 6.907250452 | 4.021284656 | protein_coding   | 13 | 86366925  | 86373623  | SLITRK6   |
| ENSG00000184574 | 3.004694206 | 1.802319292 | protein_coding   | 12 | 6728001   | 6750426   | LPAR5     |
| ENSG00000184575 | 11.20589934 | 11.38503041 | protein_coding   | 12 | 64798130  | 64844907  | XPOT      |
| ENSG00000184584 | 9.084367772 | 8.696649474 | protein_coding   | 5  | 138855119 | 138862520 | TMEM173   |
| ENSG00000184588 | 0           | 0.697730409 | protein_coding   | 1  | 66258197  | 66840259  | PDE4B     |
| ENSG00000184596 | 3.335220907 | 3.368666104 | pseudogene       | X  | 48797263  | 48798079  |           |
| ENSG00000184599 | 3.911897206 | 3.232099092 | protein_coding   | 1  | 113263041 | 113269857 | FAM19A3   |
| ENSG00000184602 | 7.969428119 | 6.398170093 | protein_coding   | 16 | 11762270  | 11773015  | SNN       |
| ENSG00000184608 | 0           | 0.390640832 | protein_coding   | 8  | 11225911  | 11296167  | C8orf12   |
| ENSG00000184611 | 0           | 0.390640832 | protein_coding   | 2  | 163227917 | 163695240 | KCNH7     |
| ENSG00000184612 | 1.616589159 | 0           | pseudogene       | 6  | 17531125  | 17531867  |           |
| ENSG00000184616 | 2.928422289 | 3.027231696 | pseudogene       | 7  | 74320406  | 74331163  |           |
| ENSG00000184617 | 0.869158192 | 0           | pseudogene       | 20 | 45113100  | 45121279  | ZNF840    |

|                 |             |             |                |   |    |           |           |           |
|-----------------|-------------|-------------|----------------|---|----|-----------|-----------|-----------|
| ENSG00000184619 | 5.718698586 | 6.615068802 | protein_coding |   | 17 | 8271955   | 8280029   | KRBA2     |
| ENSG00000184634 | 9.070017088 | 9.512222494 | protein_coding | X |    | 70338406  | 70362303  | MED12     |
| ENSG00000184635 | 7.624369505 | 8.365015357 | protein_coding |   | 19 | 20011722  | 20046860  | ZNF93     |
| ENSG00000184640 | 11.8864536  | 11.16978367 | protein_coding |   | 17 | 75277492  | 75496674  | 9-sep     |
| ENSG00000184661 | 8.359012976 | 8.554729165 | protein_coding |   | 8  | 25316513  | 25365436  | CDCA2     |
| ENSG00000184669 | 0.869158192 | 0.390640832 | pseudogene     |   | 11 | 17035545  | 17074583  | OR7E14P   |
| ENSG00000184675 | 8.092494681 | 7.716212954 | protein_coding | X |    | 63404997  | 63425624  | FAM123B   |
| ENSG00000184677 | 9.000704568 | 8.995422414 | protein_coding |   | 1  | 22778344  | 22857650  | ZBTB40    |
| ENSG00000184678 | 7.484876093 | 6.525377513 | protein_coding |   | 1  | 149856010 | 149858232 | HIST2H2BE |
| ENSG00000184682 | 2.10647801  | 2.420525079 | protein_coding |   | 11 | 1910375   | 1912084   | C11orf89  |
| ENSG00000184697 | 0.869158192 | 0.950786998 | protein_coding |   | 16 | 3064713   | 3070072   | CLDN6     |
| ENSG00000184702 | 4.026095388 | 3.133298822 | protein_coding |   | 22 | 19701987  | 19712295  | 5-sep     |
| ENSG00000184708 | 8.596266901 | 8.709567138 | protein_coding |   | 22 | 31835349  | 31892094  | EIF4ENIF1 |
| ENSG00000184709 | 0.499066092 | 0           | protein_coding |   | 9  | 140063210 | 140064503 | LRRC26    |
| ENSG00000184719 | 6.138202758 | 6.117167886 | protein_coding |   | 10 | 90033621  | 90344287  | RNLS      |
| ENSG00000184730 | 2.471521042 | 2.039052734 | protein_coding |   | 16 | 28505970  | 28510291  | APOBR     |
| ENSG00000184743 | 10.25147099 | 10.35557934 | protein_coding |   | 11 | 63391559  | 63439393  | ATL3      |
| ENSG00000184752 | 7.773523328 | 8.119352325 | protein_coding |   | 12 | 95290831  | 95397546  | NDUFA12   |
| ENSG00000184774 | 0           | 0.390640832 | protein_coding |   | 1  | 202789394 | 202796353 |           |
| ENSG00000184779 | 1.16343121  | 0.390640832 | protein_coding |   | 15 | 82821158  | 82824972  | RPS17     |
| ENSG00000184785 | 6.212449006 | 6.424524724 | protein_coding | X |    | 134124968 | 134126501 | CXorf69   |
| ENSG00000184786 | 1.616589159 | 1.353254395 | protein_coding |   | 6  | 170140210 | 170151655 | TCTE3     |
| ENSG00000184787 | 9.944072862 | 9.754816173 | protein_coding |   | 21 | 46188955  | 46221934  | UBE2G2    |
| ENSG00000184788 | 5.018397273 | 5.163066621 | protein_coding | X |    | 84347293  | 84364054  | SATL1     |
| ENSG00000184792 | 8.724437638 | 8.395978102 | protein_coding |   | 22 | 31089769  | 31303811  | OSBP2     |
| ENSG00000184825 | 0.869158192 | 1.518964905 | protein_coding |   | 6  | 27114861  | 27115317  | HIST1H2AH |
| ENSG00000184828 | 3.502389126 | 2.971122874 | protein_coding |   | 18 | 45553640  | 45935663  | ZBTB7C    |
| ENSG00000184831 | 7.440941622 | 8.019149911 | protein_coding | X |    | 23851470  | 23926057  | APOO      |
| ENSG00000184838 | 0.869158192 | 0.697730409 | protein_coding |   | 5  | 119799973 | 120023027 | PRR16     |
| ENSG00000184840 | 10.96587395 | 11.31684713 | protein_coding |   | 5  | 177019159 | 177023125 | TMED9     |
| ENSG00000184844 | 0.499066092 | 0.697730409 | pseudogene     | X |    | 153106637 | 153107540 |           |
| ENSG00000184845 | 0           | 1.353254395 | protein_coding |   | 5  | 174867675 | 174871163 | DRD1      |
| ENSG00000184857 | 6.872051157 | 7.240325909 | protein_coding |   | 16 | 8874241   | 8891505   | TMEM186   |
| ENSG00000184863 | 9.736077124 | 9.20301961  | protein_coding |   | 7  | 155437145 | 155574179 | RBM33     |
| ENSG00000184867 | 4.999881834 | 5.317302248 | protein_coding | X |    | 100910267 | 100914876 | ARMCX2    |
| ENSG00000184886 | 7.484876093 | 7.335063441 | protein_coding |   | 17 | 34890847  | 34895150  | PIGW      |
| ENSG00000184887 | 8.894453552 | 8.083414408 | protein_coding |   | 14 | 105714827 | 105717430 | BTBD6     |
| ENSG00000184897 | 9.9349646   | 9.829200569 | protein_coding |   | 3  | 129033615 | 129035120 | H1FX      |
| ENSG00000184898 | 6.086493765 | 5.717592784 | protein_coding |   | 2  | 152104454 | 152118393 | RBM43     |
| ENSG00000184900 | 9.999878142 | 10.04882736 | protein_coding |   | 21 | 46191374  | 46238694  | SUMO3     |
| ENSG00000184903 | 5.346128795 | 5.41517489  | protein_coding |   | 7  | 110303110 | 111202573 | IMMP2L    |
| ENSG00000184905 | 0           | 0.390640832 | protein_coding | X |    | 101380660 | 101382683 | TCEAL2    |
| ENSG00000184906 | 0.499066092 | 0           | pseudogene     |   | 9  | 42845768  | 42859085  |           |
| ENSG00000184908 | 2.671945279 | 1.667587519 | protein_coding |   | 1  | 16370247  | 16383803  | CLCNKB    |
| ENSG00000184916 | 9.312488937 | 6.889336956 | protein_coding |   | 14 | 105607318 | 105635161 | JAG2      |
| ENSG00000184922 | 6.912209543 | 5.638744877 | protein_coding |   | 17 | 43299292  | 43324681  | FMNL1     |
| ENSG00000184923 | 0.869158192 | 2.039052734 | protein_coding |   | 10 | 88985205  | 88994912  | FAM22A    |
| ENSG00000184924 | 5.625150983 | 6.2290532   | protein_coding |   | 2  | 25012855  | 25016251  | PTRHD1    |
| ENSG00000184925 | 1.960915222 | 2.652276565 | protein_coding |   | 9  | 139844003 | 139849949 | LCN12     |
| ENSG00000184937 | 3.744048221 | 3.453019579 | protein_coding |   | 11 | 32409321  | 32457176  | WT1       |
| ENSG00000184939 | 8.3053626   | 8.302443832 | protein_coding |   | 16 | 68563993  | 68601039  | ZFP90     |
| ENSG00000184949 | 6.522395495 | 6.945015469 | protein_coding |   | 22 | 38974125  | 39052634  |           |
| ENSG00000184956 | 3.652182994 | 3.570966319 | protein_coding |   | 11 | 1012821   | 1036706   | MUC6      |
| ENSG00000184967 | 8.991362316 | 8.65607594  | protein_coding |   | 12 | 132628993 | 132637013 | NOC4L     |
| ENSG00000184979 | 7.003331296 | 7.780879746 | protein_coding |   | 22 | 18632666  | 18672923  | USP18     |
| ENSG00000184983 | 9.200400892 | 9.871482642 | protein_coding |   | 22 | 42481529  | 42486959  | NDUFA6    |
| ENSG00000184984 | 0.869158192 | 1.353254395 | protein_coding |   | 15 | 34260921  | 34357291  | CHRM5     |
| ENSG00000184985 | 8.457286611 | 7.791043682 | protein_coding |   | 4  | 7194265   | 7744554   | SORCS2    |
| ENSG00000184986 | 4.261916566 | 5.361622823 | protein_coding |   | 14 | 105992940 | 105996539 | TMEM121   |
| ENSG00000184988 | 4.77879189  | 4.693656882 | protein_coding |   | 17 | 41363894  | 41371589  | TMEM106A  |
| ENSG00000184990 | 9.475476535 | 8.939865791 | protein_coding |   | 14 | 105219437 | 105234831 | SIVA1     |
| ENSG00000184992 | 8.678607554 | 8.391976969 | protein_coding |   | 12 | 125478246 | 125515684 | BRI3BP    |
| ENSG00000184995 | 2.10647801  | 1.353254395 | protein_coding |   | 9  | 21480841  | 21482312  | IFNE      |

|                 |             |             |                  |    |           |           |           |
|-----------------|-------------|-------------|------------------|----|-----------|-----------|-----------|
| ENSG00000184999 | 0.499066092 | 0           | protein_coding   | 11 | 62905339  | 63137190  | SLC22A10  |
| ENSG00000185000 | 7.423680977 | 7.953699568 | protein_coding   | 8  | 145539954 | 145550573 | DGAT1     |
| ENSG00000185009 | 9.414746625 | 8.888724634 | protein_coding   | 10 | 75881524  | 75910821  | AP3M1     |
| ENSG00000185010 | 6.252103507 | 7.026422172 | protein_coding   | X  | 154064063 | 154255215 | F8        |
| ENSG00000185013 | 1.16343121  | 0.697730409 | protein_coding   | 2  | 18744138  | 18770838  | NT5C1B    |
| ENSG00000185015 | 3.911897206 | 4.693656882 | protein_coding   | 8  | 86132816  | 86196302  | CA13      |
| ENSG00000185019 | 7.599989788 | 7.470237199 | protein_coding   | 20 | 3088219   | 3140842   | UBOX5     |
| ENSG00000185020 | 0           | 0.390640832 | pseudogene       | 9  | 40293025  | 40339528  |           |
| ENSG00000185022 | 9.479658457 | 8.531880603 | protein_coding   | 22 | 38597889  | 38612518  | MAFF      |
| ENSG00000185024 | 8.878072281 | 8.17939326  | protein_coding   | 14 | 105675623 | 105781926 | BRF1      |
| ENSG00000185028 | 0.499066092 | 0.950786998 | protein_coding   | 5  | 191626    | 195468    | LRRC14B   |
| ENSG00000185031 | 0           | 0.697730409 | pseudogene       | 1  | 65450289  | 65451772  |           |
| ENSG00000185033 | 11.26717977 | 10.51277051 | protein_coding   | 15 | 90703836  | 90772911  | SEMA4B    |
| ENSG00000185038 | 0.499066092 | 0.950786998 | protein_coding   | 2  | 234684370 | 234742069 | HEATR7B1  |
| ENSG00000185040 | 1.407729925 | 1.16600992  | pseudogene       | 7  | 76163011  | 76170884  |           |
| ENSG00000185043 | 9.899819083 | 9.781059731 | protein_coding   | 15 | 90773207  | 90777279  | CIB1      |
| ENSG00000185044 | 4.381167248 | 4.566889334 | processed_transc | 1  | 143354963 | 143467658 |           |
| ENSG00000185046 | 0.869158192 | 0.697730409 | protein_coding   | 12 | 99120235  | 100378432 | ANKS1B    |
| ENSG00000185049 | 8.794597401 | 8.65940853  | protein_coding   | 4  | 1984441   | 2043630   | WHSC2     |
| ENSG00000185052 | 0           | 0.697730409 | protein_coding   | 20 | 19193290  | 19703545  | SLC24A3   |
| ENSG00000185055 | 1.799000381 | 2.039052734 | protein_coding   | 7  | 105205567 | 105241322 | EFCAB10   |
| ENSG00000185056 | 0.499066092 | 0           | protein_coding   | 5  | 173400782 | 173433143 | C5orf47   |
| ENSG00000185065 | 3.274897671 | 2.420525079 | processed_transc | 22 | 19435416  | 19437628  |           |
| ENSG00000185068 | 6.658471572 | 7.558560655 | protein_coding   | 6  | 158589384 | 158615020 | GTF2H5    |
| ENSG00000185070 | 7.950269163 | 8.127396674 | protein_coding   | 14 | 85996488  | 86095034  | FLRT2     |
| ENSG00000185078 | 0           | 0.390640832 | pseudogene       | 2  | 208896107 | 208896677 |           |
| ENSG00000185085 | 9.16240384  | 9.259743207 | protein_coding   | 11 | 62414320  | 62420774  | INTS5     |
| ENSG00000185088 | 7.556308086 | 8.788797839 | protein_coding   | 15 | 63418071  | 63450220  | RPS27L    |
| ENSG00000185090 | 7.33043718  | 7.394933125 | protein_coding   | 1  | 38259474  | 38266809  | MANEAL    |
| ENSG00000185100 | 5.938793061 | 4.342020395 | protein_coding   | 14 | 105190523 | 105213662 | ADSSL1    |
| ENSG00000185101 | 8.637276046 | 6.252780742 | protein_coding   | 11 | 417933    | 442011    | ANO9      |
| ENSG00000185104 | 9.166560209 | 9.237617989 | protein_coding   | 1  | 50905150  | 51425935  | FAF1      |
| ENSG00000185105 | 1.407729925 | 1.16600992  | protein_coding   | 17 | 79897521  | 79905109  | MYADML2   |
| ENSG00000185112 | 5.672682881 | 5.855704078 | protein_coding   | 3  | 194406622 | 194409762 | FAM43A    |
| ENSG00000185115 | 7.23866569  | 7.370740503 | protein_coding   | 15 | 29560353  | 29562033  | NDNL2     |
| ENSG00000185122 | 9.88413009  | 9.611339686 | protein_coding   | 8  | 145515280 | 145538385 | HSF1      |
| ENSG00000185127 | 7.524276744 | 7.743685008 | protein_coding   | 6  | 170102233 | 170106401 | C6orf120  |
| ENSG00000185128 | 3.004694206 | 3.411459265 | protein_coding   | 17 | 36283971  | 36294915  | TBC1D3F   |
| ENSG00000185129 | 7.444369108 | 7.373448694 | protein_coding   | 5  | 139487362 | 139496321 | PURA      |
| ENSG00000185130 | 1.799000381 | 2.144285137 | protein_coding   | 6  | 27775257  | 27775709  | HIST1H2BL |
| ENSG00000185133 | 7.127924785 | 7.340609974 | protein_coding   | 22 | 31518717  | 31530682  | INPP5J    |
| ENSG00000185158 | 5.538004898 | 5.09905904  | protein_coding   | 17 | 30335037  | 30380517  | LRRC37B   |
| ENSG00000185162 | 0.499066092 | 0.390640832 | pseudogene       | 11 | 74409389  | 74409869  |           |
| ENSG00000185163 | 8.727254249 | 8.385283657 | protein_coding   | 12 | 132621139 | 132628880 | DDX51     |
| ENSG00000185164 | 6.721980839 | 7.083771121 | protein_coding   | 16 | 18511182  | 18573533  | NOMO2     |
| ENSG00000185168 | 3.502389126 | 3.714580548 | protein_coding   | 17 | 79276624  | 79283048  | LINC00482 |
| ENSG00000185186 | 4.821592551 | 5.212303549 | lincRNA          | 21 | 44881974  | 44899414  | LINC00313 |
| ENSG00000185187 | 7.258272112 | 6.930376707 | protein_coding   | 11 | 405716    | 417455    | SIGIRR    |
| ENSG00000185189 | 7.82964357  | 8.14493792  | protein_coding   | 8  | 144915764 | 144924200 | NRBP2     |
| ENSG00000185198 | 1.960915222 | 1.802319292 | protein_coding   | 19 | 685548    | 695461    | PRSS57    |
| ENSG00000185201 | 9.540974801 | 10.00452874 | protein_coding   | 11 | 307631    | 315272    | IFITM2    |
| ENSG00000185215 | 13.58364562 | 12.47570712 | protein_coding   | 14 | 103589779 | 103603776 | TNFAIP2   |
| ENSG00000185219 | 7.660183591 | 7.873706627 | protein_coding   | 3  | 44481262  | 44519162  | ZNF445    |
| ENSG00000185220 | 5.827699195 | 6.686500471 | protein_coding   | 1  | 249200395 | 249214145 | PGBD2     |
| ENSG00000185221 | 0           | 0.390640832 | pseudogene       | 1  | 215044077 | 215045059 | GAPDHP24  |
| ENSG00000185222 | 7.952677993 | 8.472492669 | protein_coding   | X  | 102611373 | 102613397 | WBP5      |
| ENSG00000185236 | 10.80120923 | 10.90994789 | protein_coding   | 19 | 8455205   | 8469313   | RAB11B    |
| ENSG00000185238 | 9.003030709 | 9.151882762 | protein_coding   | 11 | 20409076  | 20530840  | PRMT3     |
| ENSG00000185245 | 6.462804234 | 5.953060722 | protein_coding   | 17 | 4835592   | 4838325   | GP1BA     |
| ENSG00000185246 | 8.209916558 | 8.985720419 | protein_coding   | 14 | 45553302  | 45585485  | PRPF39    |
| ENSG00000185250 | 5.255381949 | 4.489113623 | protein_coding   | 6  | 109711419 | 109762374 | PPIL6     |
| ENSG00000185252 | 8.006999229 | 7.883239271 | protein_coding   | 22 | 20748405  | 20762745  | ZNF74     |
| ENSG00000185261 | 3.448790144 | 3.679994897 | protein_coding   | 5  | 93488671  | 93954309  | KIAA0825  |

|                 |             |             |                  |    |           |           |           |
|-----------------|-------------|-------------|------------------|----|-----------|-----------|-----------|
| ENSG00000185262 | 8.237837231 | 8.490068116 | protein_coding   | 17 | 74261283  | 74267375  | FAM100B   |
| ENSG00000185267 | 3.950976309 | 3.608232228 | protein_coding   | 10 | 14861249  | 14880574  | CDNF      |
| ENSG00000185269 | 2.847891871 | 1.518964905 | protein_coding   | 17 | 79910388  | 79919716  | NOTUM     |
| ENSG00000185271 | 0.499066092 | 0.390640832 | protein_coding   | 14 | 20896970  | 20903801  | KLHL33    |
| ENSG00000185272 | 1.407729925 | 0           | protein_coding   | 21 | 15588451  | 15600693  | RBM11     |
| ENSG00000185275 | 6.670228606 | 5.03207928  | pseudogene       | Y  | 21154139  | 21154595  | CD24P4    |
| ENSG00000185278 | 3.830412367 | 4.744751758 | protein_coding   | 1  | 173837220 | 173866494 | ZBTB37    |
| ENSG00000185291 | 4.131913373 | 2.721932731 | protein_coding   | X  | 1455509   | 1501578   | IL3RA     |
| ENSG00000185298 | 8.462367008 | 8.497535398 | protein_coding   | 17 | 79633761  | 79640937  | CCDC137   |
| ENSG00000185304 | 0.499066092 | 0           | protein_coding   | 2  | 88055474  | 88285309  | RGPD2     |
| ENSG00000185305 | 7.04004079  | 6.554308016 | protein_coding   | 5  | 53179775  | 53606412  | ARL15     |
| ENSG00000185324 | 9.46032044  | 9.847821207 | protein_coding   | 16 | 89747145  | 89762772  | CDK10     |
| ENSG00000185332 | 2.10647801  | 0.390640832 | protein_coding   | 17 | 79285074  | 79304474  | TMEM105   |
| ENSG00000185338 | 5.938793061 | 6.030599799 | protein_coding   | 16 | 11348262  | 11350036  | SOCS1     |
| ENSG00000185339 | 7.266040677 | 7.830998152 | protein_coding   | 22 | 31002825  | 31023265  | TCN2      |
| ENSG00000185340 | 9.75276053  | 9.469827862 | protein_coding   | 22 | 29702572  | 29708774  | GAS2L1    |
| ENSG00000185344 | 7.581430769 | 7.987679908 | protein_coding   | 12 | 124196865 | 124245549 | ATP6V0A2  |
| ENSG00000185345 | 1.407729925 | 2.039052734 | protein_coding   | 6  | 161768452 | 163148803 | PARK2     |
| ENSG00000185347 | 8.101206377 | 8.234057939 | protein_coding   | 14 | 105956192 | 105965912 | C14orf80  |
| ENSG00000185359 | 10.74499215 | 10.65032385 | protein_coding   | 17 | 79651020  | 79669145  | HGS       |
| ENSG00000185361 | 8.099033379 | 7.568048738 | protein_coding   | 19 | 4639527   | 4655580   | TNFAIP8L1 |
| ENSG00000185379 | 7.2307479   | 7.20731193  | protein_coding   | 17 | 33426811  | 33448541  | RAD51D    |
| ENSG00000185386 | 5.729976786 | 5.656642807 | protein_coding   | 22 | 50702142  | 50709196  | MAPK11    |
| ENSG00000185404 | 7.993024472 | 8.14810445  | protein_coding   | 2  | 231191899 | 231268447 | SP140L    |
| ENSG00000185414 | 0.869158192 | 0.697730409 | protein_coding   | 2  | 99771461  | 99814089  | MRPL30    |
| ENSG00000185418 | 6.634666104 | 7.116470702 | protein_coding   | 15 | 102193801 | 102264807 | TARSL2    |
| ENSG00000185420 | 6.652556929 | 6.97385478  | protein_coding   | 1  | 245912642 | 246670614 | SMYD3     |
| ENSG00000185432 | 4.409500985 | 3.570966319 | non_coding       | 12 | 51317255  | 51326300  | METTL7A   |
| ENSG00000185433 | 0.869158192 | 0.950786998 | non_coding       | 21 | 26758133  | 26804013  | LINC00158 |
| ENSG00000185436 | 4.292665995 | 2.334191469 | protein_coding   | 1  | 24480647  | 24514449  | IL28RA    |
| ENSG00000185437 | 4.165528823 | 4.917990497 | protein_coding   | 21 | 40817781  | 40887433  | SH3BGR    |
| ENSG00000185442 | 2.762599152 | 2.912743273 | protein_coding   | 15 | 93160673  | 93353114  | FAM174B   |
| ENSG00000185453 | 6.252103507 | 5.923798455 | protein_coding   | 19 | 48673949  | 48700877  | C19orf68  |
| ENSG00000185467 | 3.146112541 | 1.802319292 | protein_coding   | 7  | 98771197  | 98805129  | KPNA7     |
| ENSG00000185475 | 7.206730419 | 7.83885796  | protein_coding   | 11 | 62554887  | 62557718  | TMEM179B  |
| ENSG00000185479 | 0.869158192 | 0           | protein_coding   | 12 | 52840435  | 52845971  | KRT6B     |
| ENSG00000185480 | 6.989320791 | 7.234379288 | protein_coding   | 12 | 102513956 | 102591298 | C12orf48  |
| ENSG00000185482 | 5.375152132 | 5.43605125  | protein_coding   | 12 | 57637236  | 57644976  | STAC3     |
| ENSG00000185483 | 7.950269163 | 7.487839978 | protein_coding   | 1  | 64239693  | 64647181  | ROR1      |
| ENSG00000185485 | 6.212449006 | 6.563824016 | pseudogene       | 3  | 195686619 | 195717189 | SDHAP1    |
| ENSG00000185495 | 4.734682531 | 4.622587519 | processed_transc | 1  | 224183659 | 224198309 |           |
| ENSG00000185499 | 9.248248601 | 9.648149235 | protein_coding   | 1  | 155158300 | 155162707 | MUC1      |
| ENSG00000185504 | 8.833021386 | 8.791837833 | protein_coding   | 17 | 79506911  | 79520987  | C17orf70  |
| ENSG00000185507 | 8.116326397 | 8.571336379 | protein_coding   | 11 | 612553    | 615999    | IRF7      |
| ENSG00000185513 | 6.716321419 | 6.382123086 | protein_coding   | 20 | 42136320  | 42179590  | L3MBTL1   |
| ENSG00000185515 | 8.629769183 | 8.76011133  | protein_coding   | X  | 154299695 | 154351349 | BRCC3     |
| ENSG00000185519 | 3.502389126 | 2.652276565 | protein_coding   | 1  | 16384264  | 16400127  | FAM131C   |
| ENSG00000185522 | 3.950976309 | 3.608232228 | protein_coding   | 11 | 554855    | 560779    | C11orf35  |
| ENSG00000185523 | 0.499066092 | 1.518964905 | protein_coding   | 1  | 213003483 | 213020991 | C1orf227  |
| ENSG00000185527 | 2.57521082  | 2.420525079 | protein_coding   | 17 | 79617489  | 79623607  | PDE6G     |
| ENSG00000185532 | 0.499066092 | 0.950786998 | protein_coding   | 10 | 52750945  | 54058110  | PRKG1     |
| ENSG00000185551 | 8.98077946  | 8.899098923 | protein_coding   | 15 | 96869167  | 96883492  | NR2F2     |
| ENSG00000185559 | 0.869158192 | 0.390640832 | protein_coding   | 14 | 101192042 | 101201539 | DLK1      |
| ENSG00000185561 | 3.335220907 | 3.679994897 | protein_coding   | 17 | 1611064   | 1613651   | TLCD2     |
| ENSG00000185567 | 10.82999183 | 10.74981828 | protein_coding   | 14 | 105403581 | 105444694 | AHNAK2    |
| ENSG00000185585 | 8.886916071 | 7.442134301 | protein_coding   | 9  | 127539437 | 127577164 | OLFML2A   |
| ENSG00000185591 | 10.45844877 | 10.16553509 | protein_coding   | 12 | 53773960  | 53810230  | SP1       |
| ENSG00000185596 | 4.230497448 | 4.468996429 | pseudogene       | 15 | 102501356 | 102516768 | WASH3P    |
| ENSG00000185607 | 2.10647801  | 1.925536307 | pseudogene       | 15 | 44281259  | 44282382  | ACTBP7    |
| ENSG00000185608 | 8.124895791 | 8.564242397 | protein_coding   | 22 | 19419425  | 19423598  | MRPL40    |
| ENSG00000185610 | 0           | 0.390640832 | protein_coding   | 12 | 45408455  | 45444882  | DBX2      |
| ENSG00000185614 | 3.652182994 | 3.027231696 | protein_coding   | 3  | 49840687  | 49842463  | FAM212A   |
| ENSG00000185615 | 1.407729925 | 1.667587519 | protein_coding   | 16 | 333152    | 337215    | PDIA2     |

|                 |             |             |                  |    |           |           |           |
|-----------------|-------------|-------------|------------------|----|-----------|-----------|-----------|
| ENSG00000185619 | 8.583888749 | 8.860045978 | protein_coding   | 4  | 699537    | 764428    | PCGF3     |
| ENSG00000185621 | 7.501423995 | 7.329495501 | protein_coding   | 3  | 197687071 | 197770591 | LMLN      |
| ENSG00000185624 | 13.0455922  | 13.30715736 | protein_coding   | 17 | 79801037  | 79818545  | P4HB      |
| ENSG00000185627 | 10.19358417 | 10.24864348 | protein_coding   | 11 | 236546    | 252983    | PSMD13    |
| ENSG00000185630 | 7.921045056 | 7.384230902 | protein_coding   | 1  | 164524821 | 164868533 | PBX1      |
| ENSG00000185633 | 2.57521082  | 2.971122874 | protein_coding   | 12 | 57628686  | 57634498  | NDUFA4L2  |
| ENSG00000185634 | 0.869158192 | 1.16600992  | protein_coding   | 15 | 49115932  | 49255641  | SHC4      |
| ENSG00000185640 | 0           | 0.697730409 | protein_coding   | 12 | 53215194  | 53228079  | KRT79     |
| ENSG00000185641 | 3.274897671 | 2.501982735 | pseudogene       | 5  | 115387607 | 115387986 |           |
| ENSG00000185650 | 12.21377612 | 12.29761875 | protein_coding   | 14 | 69254377  | 69263190  | ZFP36L1   |
| ENSG00000185651 | 10.16686131 | 10.38137143 | protein_coding   | 22 | 21903736  | 21978323  | UBE2L3    |
| ENSG00000185658 | 8.389559911 | 8.853271458 | protein_coding   | 21 | 40556102  | 40693485  | BRWD1     |
| ENSG00000185662 | 0           | 0.390640832 | protein_coding   | 5  | 171212876 | 171221602 | C5orf50   |
| ENSG00000185664 | 4.230497448 | 3.781359661 | protein_coding   | 12 | 56347889  | 56367099  | PMEL      |
| ENSG00000185666 | 2.671945279 | 3.781359661 | protein_coding   | 22 | 32908539  | 33454358  | SYN3      |
| ENSG00000185668 | 0           | 0.390640832 | protein_coding   | 1  | 38509523  | 38512450  | POU3F1    |
| ENSG00000185669 | 3.871730003 | 3.279072565 | protein_coding   | 16 | 88744090  | 88752901  | SNAI3     |
| ENSG00000185670 | 6.320845526 | 6.577981353 | protein_coding   | 11 | 62515795  | 62521660  | ZBTB3     |
| ENSG00000185674 | 0.499066092 | 1.353254395 | protein_coding   | 2  | 99858709  | 99871745  | LYG2      |
| ENSG00000185681 | 0.499066092 | 1.16600992  | protein_coding   | 9  | 124922190 | 124962367 | MORN5     |
| ENSG00000185684 | 7.210761201 | 6.923001245 | protein_coding   | 12 | 132568828 | 132613029 | EP400NL   |
| ENSG00000185686 | 8.554057865 | 9.940224002 | protein_coding   | 22 | 22890123  | 22901768  | PRAME     |
| ENSG00000185689 | 1.16343121  | 1.518964905 | protein_coding   | 6  | 4079440   | 4131185   | C6orf201  |
| ENSG00000185697 | 8.680062001 | 8.988372895 | protein_coding   | 8  | 67474414  | 67526482  | MYBL1     |
| ENSG00000185710 | 0.499066092 | 0           | pseudogene       | 16 | 21890659  | 21930477  |           |
| ENSG00000185716 | 6.94645393  | 6.970281236 | protein_coding   | 16 | 22018959  | 22098855  | C16orf52  |
| ENSG00000185721 | 9.492959727 | 10.15730836 | protein_coding   | 22 | 31795509  | 31924726  | DRG1      |
| ENSG00000185722 | 10.32024245 | 10.83407108 | protein_coding   | 17 | 4066665   | 4167274   | ANKFY1    |
| ENSG00000185728 | 9.510233586 | 9.595189186 | processed_transc | 8  | 64081112  | 64125346  | YTHDF3    |
| ENSG00000185730 | 5.83815965  | 5.767861411 | protein_coding   | 8  | 144371846 | 144380231 | ZNF696    |
| ENSG00000185739 | 0.499066092 | 0.390640832 | protein_coding   | 16 | 4239377   | 4292081   | SRL       |
| ENSG00000185745 | 8.193715877 | 9.952954219 | protein_coding   | 10 | 91152303  | 91163745  | IFIT1     |
| ENSG00000185753 | 7.326727684 | 7.057067116 | protein_coding   | X  | 40488285  | 40506819  | CXorf38   |
| ENSG00000185758 | 1.407729925 | 0           | protein_coding   | 4  | 184242917 | 184243579 | CLDN24    |
| ENSG00000185760 | 7.23866569  | 6.984522608 | protein_coding   | 6  | 73331520  | 73908574  | KCNQ5     |
| ENSG00000185761 | 7.345180517 | 7.607691112 | protein_coding   | 19 | 1505017   | 1513188   | ADAMTSL5  |
| ENSG00000185774 | 3.211941663 | 3.748356452 | protein_coding   | 4  | 20730239  | 21950422  | KCNIP4    |
| ENSG00000185787 | 10.16634253 | 10.2839776  | protein_coding   | 15 | 79102829  | 79190475  | MORF4L1   |
| ENSG00000185792 | 3.274897671 | 3.493416095 | protein_coding   | 19 | 56219798  | 56249768  | NLRP9     |
| ENSG00000185798 | 6.941611359 | 6.758710666 | protein_coding   | 3  | 196281056 | 196295545 | WDR53     |
| ENSG00000185800 | 8.375265417 | 8.278081046 | protein_coding   | 19 | 46286205  | 46296060  | DMWD      |
| ENSG00000185803 | 9.205459721 | 9.125618162 | protein_coding   | 8  | 145577795 | 145584932 | GPR172A   |
| ENSG00000185808 | 5.60078458  | 6.037446454 | protein_coding   | 21 | 38435146  | 38445470  | PIGP      |
| ENSG00000185811 | 1.16343121  | 0           | protein_coding   | 7  | 50343720  | 50472799  | IKZF1     |
| ENSG00000185813 | 7.990682129 | 7.373448694 | protein_coding   | 17 | 79860777  | 79869340  | PCYT2     |
| ENSG00000185818 | 6.220467583 | 6.343971006 | protein_coding   | 4  | 2061239   | 2070816   | NAT8L     |
| ENSG00000185825 | 10.95870143 | 11.09852958 | protein_coding   | X  | 152965947 | 152990152 | BCAP31    |
| ENSG00000185829 | 6.407685389 | 6.091080508 | protein_coding   | 17 | 44594069  | 44657088  | ARL17A    |
| ENSG00000185837 | 2.238690726 | 1.667587519 | antisense        | 22 | 17640274  | 17646335  | CECR5-AS1 |
| ENSG00000185838 | 8.105542576 | 8.006993014 | protein_coding   | 22 | 19770747  | 19842462  | GNB1L     |
| ENSG00000185839 | 0.869158192 | 1.353254395 | pseudogene       | 1  | 59096513  | 59097202  |           |
| ENSG00000185842 | 6.956090577 | 7.077141316 | protein_coding   | 1  | 225083964 | 225586996 | DNAH14    |
| ENSG00000185860 | 4.6658819   | 5.953060722 | protein_coding   | 1  | 162794248 | 162838605 | C1orf110  |
| ENSG00000185862 | 5.774228067 | 6.316088276 | protein_coding   | 17 | 29630790  | 29641123  | EVI2B     |
| ENSG00000185864 | 5.072559152 | 4.777836593 | protein_coding   | 16 | 21845890  | 21892148  |           |
| ENSG00000185869 | 7.153278907 | 7.370740503 | protein_coding   | 19 | 37379026  | 37407193  | ZNF829    |
| ENSG00000185875 | 7.254372086 | 7.426571535 | protein_coding   | 10 | 25305587  | 25315593  | THNSL1    |
| ENSG00000185880 | 7.102117104 | 7.951888765 | protein_coding   | 15 | 45021186  | 45060027  | TRIM69    |
| ENSG00000185883 | 2.847891871 | 3.570966319 | protein_coding   | 16 | 2563727   | 2570219   | ATP6V0C   |
| ENSG00000185885 | 7.840089987 | 8.527023921 | protein_coding   | 11 | 313506    | 315272    | IFITM1    |
| ENSG00000185888 | 0           | 0.390640832 | protein_coding   | 1  | 228003394 | 228034171 | PRSS38    |
| ENSG00000185896 | 11.58215179 | 11.59407985 | protein_coding   | 13 | 113951556 | 113977987 | LAMP1     |
| ENSG00000185900 | 6.005279909 | 6.429738366 | protein_coding   | 8  | 42948658  | 42978577  |           |

|                 |             |             |                  |   |    |           |           |            |
|-----------------|-------------|-------------|------------------|---|----|-----------|-----------|------------|
| ENSG00000185903 | 0.499066092 | 1.667587519 | pseudogene       | X |    | 130458372 | 130459224 | OR11N1P    |
| ENSG00000185904 | 0.499066092 | 0           | processed_transc |   | 10 | 42970991  | 42990784  |            |
| ENSG00000185909 | 6.442380648 | 6.25865215  | protein_coding   |   | 3  | 49209044  | 49213918  | KLHDC8B    |
| ENSG00000185917 | 7.395627075 | 7.805153958 | protein_coding   |   | 21 | 37406839  | 37451687  | SETD4      |
| ENSG00000185920 | 8.753741308 | 8.608592853 | protein_coding   |   | 9  | 98205262  | 98279339  | PTCH1      |
| ENSG00000185924 | 7.950269163 | 6.530239731 | protein_coding   |   | 17 | 1837978   | 1928178   | RTN4RL1    |
| ENSG00000185928 | 7.876068031 | 8.020878279 | protein_coding   |   | 16 | 29827285  | 29833215  | C16orf53   |
| ENSG00000185933 | 0.499066092 | 0.697730409 | protein_coding   |   | 10 | 105213144 | 105218645 | CALHM1     |
| ENSG00000185946 | 5.563445526 | 6.117167886 | protein_coding   |   | 1  | 104068313 | 104097854 | RNPC3      |
| ENSG00000185947 | 7.618313091 | 7.477807561 | protein_coding   |   | 16 | 31885079  | 31929914  | ZNF267     |
| ENSG00000185950 | 8.179389493 | 8.548751381 | protein_coding   |   | 13 | 110406184 | 110438915 | IRS2       |
| ENSG00000185955 | 3.077135474 | 1.925536307 | protein_coding   |   | 7  | 100054238 | 100061894 | C7orf61    |
| ENSG00000185958 | 1.16343121  | 1.353254395 | protein_coding   |   | 12 | 50720013  | 50790405  | FAM186A    |
| ENSG00000185963 | 9.87399885  | 9.587628836 | protein_coding   |   | 9  | 95473645  | 95527094  | BICD2      |
| ENSG00000185972 | 0           | 0.390640832 | protein_coding   |   | 9  | 36169389  | 36171329  | CCIN       |
| ENSG00000185973 | 0.499066092 | 0           | protein_coding   | X |    | 154719776 | 154899605 | TMLHE      |
| ENSG00000185974 | 1.16343121  | 2.039052734 | protein_coding   |   | 13 | 114321594 | 114438637 | GRK1       |
| ENSG00000185986 | 4.642199401 | 5.200150955 | pseudogene       |   | 5  | 1568637   | 1594735   | SDHAP3     |
| ENSG00000185988 | 7.627388205 | 8.151264044 | pseudogene       |   | 19 | 1524138   | 1535455   | PLK5       |
| ENSG00000185989 | 7.633406721 | 7.982367515 | protein_coding   |   | 13 | 114747194 | 114898086 | RASA3      |
| ENSG00000186001 | 8.959377969 | 8.92701904  | protein_coding   |   | 3  | 197518097 | 197615307 | LRCH3      |
| ENSG00000186007 | 3.274897671 | 3.993387124 | protein_coding   |   | 1  | 205350506 | 205425082 | LEMD1      |
| ENSG00000186009 | 0           | 0.697730409 | protein_coding   |   | 13 | 114303173 | 114312501 | ATP4B      |
| ENSG00000186010 | 8.340737341 | 9.261206227 | protein_coding   |   | 19 | 19626596  | 19644285  | NDUFA13    |
| ENSG00000186017 | 6.407685389 | 6.699508919 | protein_coding   |   | 19 | 36936021  | 36980804  | ZNF566     |
| ENSG00000186019 | 7.575190993 | 7.774746834 | protein_coding   |   | 19 | 44598503  | 44612919  | ZNF224     |
| ENSG00000186020 | 7.007971391 | 7.18590274  | protein_coding   |   | 19 | 37034518  | 37064197  | ZNF529     |
| ENSG00000186026 | 5.774228067 | 5.656642807 | protein_coding   |   | 19 | 44576297  | 44591623  | ZNF284     |
| ENSG00000186047 | 1.407729925 | 0.697730409 | protein_coding   |   | 13 | 51285144  | 51418075  | DLEU7      |
| ENSG00000186051 | 1.16343121  | 0.697730409 | protein_coding   |   | 9  | 108424738 | 108425367 | TAL2       |
| ENSG00000186056 | 3.830412367 | 4.021284656 | antisense        |   | 1  | 31190940  | 31199674  |            |
| ENSG00000186063 | 9.834707333 | 9.94978218  | protein_coding   |   | 1  | 222841355 | 222886552 | AIDA       |
| ENSG00000186073 | 7.352496068 | 6.870289474 | protein_coding   |   | 15 | 36871812  | 37102449  | C15orf41   |
| ENSG00000186076 | 0           | 0.950786998 | pseudogene       |   | 12 | 94034598  | 94035362  |            |
| ENSG00000186081 | 0           | 0.697730409 | protein_coding   |   | 12 | 52908359  | 52914471  | KRT5       |
| ENSG00000186082 | 0.869158192 | 0.950786998 | pseudogene       |   | 11 | 35881799  | 35883048  |            |
| ENSG00000186088 | 6.204385613 | 6.414040573 | protein_coding   |   | 7  | 76940068  | 77046115  | PION       |
| ENSG00000186104 | 6.681890601 | 7.495318771 | protein_coding   |   | 11 | 14899553  | 14913798  | CYP2R1     |
| ENSG00000186105 | 0.499066092 | 0.950786998 | protein_coding   |   | 5  | 61874562  | 61877275  | LRRC70     |
| ENSG00000186106 | 5.389447744 | 5.717592784 | protein_coding   |   | 8  | 101521980 | 101572012 | ANKRD46    |
| ENSG00000186111 | 10.08633286 | 9.967814887 | protein_coding   |   | 19 | 3630182   | 3700463   | PIP5K1C    |
| ENSG00000186118 | 0.499066092 | 0.697730409 | protein_coding   |   | 1  | 47134527  | 47139266  | ATPAF1-AS1 |
| ENSG00000186130 | 7.474855471 | 7.502758994 | protein_coding   |   | 9  | 125670335 | 125675609 | ZBTB6      |
| ENSG00000186132 | 4.568725997 | 4.528525526 | protein_coding   |   | 2  | 120059801 | 120124404 | C2orf76    |
| ENSG00000186136 | 0.499066092 | 0.390640832 | protein_coding   |   | 12 | 11338599  | 11339543  | TAS2R42    |
| ENSG00000186141 | 8.105542576 | 8.626866398 | protein_coding   |   | 1  | 145592605 | 145611025 | POLR3C     |
| ENSG00000186150 | 2.928422289 | 2.851901313 | protein_coding   |   | 1  | 110655062 | 110656569 | UBL4B      |
| ENSG00000186152 | 0           | 0.390640832 | pseudogene       |   | 19 | 55208383  | 55212683  | LILRP1     |
| ENSG00000186153 | 6.75547892  | 6.835357159 | protein_coding   |   | 16 | 78133310  | 79246564  | WWOX       |
| ENSG00000186160 | 0           | 0.950786998 | protein_coding   |   | 1  | 47533160  | 47583991  | CYP4Z1     |
| ENSG00000186162 | 6.716321419 | 6.866449614 | pseudogene       |   | 3  | 10055932  | 10068049  | CIDCEP     |
| ENSG00000186163 | 1.16343121  | 0.390640832 | pseudogene       |   | 7  | 141965650 | 141972054 |            |
| ENSG00000186166 | 8.090308512 | 8.245929405 | protein_coding   |   | 11 | 118868852 | 118886501 | CCDC84     |
| ENSG00000186174 | 11.76253139 | 11.25338986 | protein_coding   |   | 11 | 118764584 | 118796317 | BCL9L      |
| ENSG00000186184 | 8.594725428 | 7.994732806 | protein_coding   |   | 13 | 28194903  | 28241548  | POLR1D     |
| ENSG00000186185 | 9.150911694 | 8.928861309 | protein_coding   |   | 17 | 43003360  | 43025082  | KIF18B     |
| ENSG00000186187 | 8.566693498 | 8.543951256 | protein_coding   |   | 16 | 75032928  | 75144892  | ZNRF1      |
| ENSG00000186188 | 1.407729925 | 0.950786998 | protein_coding   |   | 10 | 95326422  | 95349829  | O3FAR1     |
| ENSG00000186190 | 0.499066092 | 0           | protein_coding   |   | 20 | 31643230  | 31661434  | BPIFB3     |
| ENSG00000186193 | 9.137210979 | 8.483815721 | protein_coding   |   | 9  | 139956581 | 139965040 | C9orf140   |
| ENSG00000186204 | 2.10647801  | 0.697730409 | protein_coding   |   | 19 | 15783567  | 15807984  | CYP4F12    |
| ENSG00000186205 | 4.464551814 | 3.32456471  | protein_coding   |   | 1  | 220960101 | 220987735 | 1-Mar      |
| ENSG00000186207 | 0.869158192 | 0           | protein_coding   |   | 1  | 152483320 | 152484653 | LCE5A      |

|                 |             |             |                  |    |           |           |            |
|-----------------|-------------|-------------|------------------|----|-----------|-----------|------------|
| ENSG00000186212 | 1.960915222 | 0.697730409 | protein_coding   | 4  | 77816082  | 77819002  | ANKRD56    |
| ENSG00000186222 | 6.892270075 | 7.033288635 | protein_coding   | 4  | 6717842   | 6719387   | CNO        |
| ENSG00000186230 | 6.877132514 | 6.815578497 | protein_coding   | 19 | 57946697  | 57956853  | ZNF749     |
| ENSG00000186231 | 0.499066092 | 0.390640832 | protein_coding   | 6  | 97372496  | 97588630  | KLHL32     |
| ENSG00000186235 | 0.499066092 | 0.390640832 | protein_coding   | 2  | 239133193 | 239140318 |            |
| ENSG00000186260 | 8.687312327 | 8.397309351 | protein_coding   | 16 | 14173145  | 14360629  | MKL2       |
| ENSG00000186265 | 0.499066092 |             | 0 protein_coding | 3  | 112182815 | 112218408 | BTLA       |
| ENSG00000186272 | 6.462804234 | 6.327306117 | protein_coding   | 19 | 57922529  | 57933307  | ZNF17      |
| ENSG00000186275 | 4.491309013 | 4.94736961  | protein_coding   | 1  | 146373546 | 146467744 | NBPF12     |
| ENSG00000186280 | 5.331395195 | 6.037446454 | protein_coding   | 11 | 94706845  | 94732682  | KDM4D      |
| ENSG00000186281 | 8.813274715 | 9.307964293 | protein_coding   | 2  | 96687694  | 96705199  | GPAT2      |
| ENSG00000186283 | 8.280649185 | 8.450859136 | protein_coding   | 1  | 179050512 | 179067158 | TOR3A      |
| ENSG00000186298 | 10.52065391 | 10.01713935 | protein_coding   | 12 | 111157485 | 111180744 | PPP1CC     |
| ENSG00000186300 | 6.163378456 | 6.349483465 | protein_coding   | 19 | 2841433   | 2860472   | ZNF555     |
| ENSG00000186301 | 2.928422289 | 3.679994897 | pseudogene       | 1  | 16972069  | 16976914  |            |
| ENSG00000186312 | 7.136425764 | 7.287036562 | pseudogene       | X  | 15693055  | 15721472  | CA5BP1     |
| ENSG00000186314 | 5.929039784 | 5.726093467 | protein_coding   | 5  | 144851362 | 145214932 | PRELID2    |
| ENSG00000186318 | 9.930083245 | 10.39142693 | protein_coding   | 11 | 117156402 | 117186975 | BACE1      |
| ENSG00000186322 | 0.499066092 |             | 0 pseudogene     | 15 | 82804003  | 82810908  |            |
| ENSG00000186326 | 1.16343121  | 1.518964905 | protein_coding   | 19 | 33166313  | 33169206  | RGS9BP     |
| ENSG00000186329 | 0           | 0.390640832 | protein_coding   | 3  | 171561139 | 171656505 | TMEM212    |
| ENSG00000186334 | 0.869158192 |             | 0 protein_coding | 5  | 150656323 | 150683327 | SLC36A3    |
| ENSG00000186335 | 0           | 0.390640832 | protein_coding   | 5  | 150694539 | 150727151 | SLC36A2    |
| ENSG00000186340 | 4.165528823 | 4.841813558 | protein_coding   | 6  | 169615875 | 169654139 | THBS2      |
| ENSG00000186350 | 10.37604692 | 9.60444017  | protein_coding   | 9  | 137208944 | 137332431 | RXRA       |
| ENSG00000186352 | 4.230497448 | 4.17820932  | protein_coding   | 4  | 186317175 | 186321782 | ANKRD37    |
| ENSG00000186354 | 2.471521042 | 2.912743273 | protein_coding   | 9  | 91605778  | 91611055  | C9orf47    |
| ENSG00000186364 | 5.525114348 | 5.886365696 | protein_coding   | 1  | 145586115 | 145590461 | NUDT17     |
| ENSG00000186369 | 0.869158192 |             | 0 lincRNA        | 14 | 62584197  | 62596352  |            |
| ENSG00000186376 | 6.804311337 | 7.505230566 | protein_coding   | X  | 134382867 | 134478012 | ZNF75D     |
| ENSG00000186377 | 5.072559152 | 5.647721597 | protein_coding   | 1  | 47427036  | 47516423  | CYP4X1     |
| ENSG00000186395 | 7.933293789 | 7.770643695 | protein_coding   | 17 | 38974369  | 38978847  | KRT10      |
| ENSG00000186399 | 2.671945279 | 3.279072565 | protein_coding   | 15 | 30695943  | 30706463  |            |
| ENSG00000186409 | 1.616589159 | 3.453019579 | protein_coding   | 1  | 42929001  | 43120335  | CCDC30     |
| ENSG00000186416 | 8.721615518 | 8.851330023 | protein_coding   | X  | 118722300 | 118739858 | NKRF       |
| ENSG00000186417 | 0.869158192 | 0.390640832 | protein_coding   | 15 | 51633826  | 51700210  | GLDN       |
| ENSG00000186432 | 10.46605656 | 9.978082538 | protein_coding   | 3  | 160212783 | 160283376 | KPNA4      |
| ENSG00000186446 | 5.613019223 | 5.751299057 | protein_coding   | 3  | 44771088  | 44778575  | ZNF501     |
| ENSG00000186448 | 6.616550626 | 6.79148052  | protein_coding   | 3  | 44626380  | 44689963  | ZNF197     |
| ENSG00000186451 | 2.471521042 | 3.027231696 | protein_coding   | 3  | 57094469  | 57109460  | SPATA12    |
| ENSG00000186452 | 0           | 0.697730409 | protein_coding   | 12 | 51236703  | 51281667  | TMPRSS12   |
| ENSG00000186466 | 1.16343121  | 0.697730409 | pseudogene       | 9  | 67272038  | 67289492  | AQP7P1     |
| ENSG00000186468 | 11.19602115 | 11.52679437 | protein_coding   | 5  | 81569177  | 81574396  | RPS23      |
| ENSG00000186469 | 2.35979773  | 3.183544561 | protein_coding   | 14 | 52292913  | 52446060  | GNG2       |
| ENSG00000186470 | 9.102921211 | 9.569438796 | protein_coding   | 6  | 26365387  | 26378546  | BTN3A2     |
| ENSG00000186471 | 0.499066092 | 1.667587519 | protein_coding   | X  | 119029800 | 119054679 | AKAP14     |
| ENSG00000186472 | 6.379315619 | 4.406904905 | protein_coding   | 7  | 82383321  | 82792246  | PCLO       |
| ENSG00000186480 | 10.26073495 | 8.001751392 | protein_coding   | 7  | 155089486 | 155101945 | INSIG1     |
| ENSG00000186481 | 3.393122761 | 3.748356452 | pseudogene       | 18 | 14179096  | 14249455  | ANKRD20A5P |
| ENSG00000186493 | 2.762599152 | 0.390640832 | protein_coding   | 5  | 2752245   | 2755508   | C5orf38    |
| ENSG00000186496 | 2.35979773  | 3.368666104 | protein_coding   | 18 | 32946661  | 32957301  | ZNF396     |
| ENSG00000186501 | 8.46911316  | 8.511125832 | protein_coding   | 1  | 27648651  | 27662891  | TMEM222    |
| ENSG00000186510 | 0.499066092 | 0.390640832 | protein_coding   | 1  | 16345330  | 16360545  | CLCNKA     |
| ENSG00000186517 | 4.292665995 | 3.714580548 | protein_coding   | 1  | 161016736 | 161039760 | ARHGAP30   |
| ENSG00000186522 | 9.679757009 | 9.422885181 | protein_coding   | 2  | 110300380 | 110371783 | 10-sep     |
| ENSG00000186523 | 6.47626108  | 5.9163892   | protein_coding   | 8  | 12035972  | 12052469  | FAM86B1    |
| ENSG00000186526 | 0.499066092 |             | 0 protein_coding | 19 | 15726029  | 15740448  | CYP4F8     |
| ENSG00000186530 | 2.35979773  | 0.390640832 | processed_transc | 8  | 6666038   | 6693166   | XKR5       |
| ENSG00000186532 | 8.219950371 | 8.782698567 | protein_coding   | 17 | 1682829   | 1733170   | SMYD4      |
| ENSG00000186543 | 0.869158192 |             | 0 pseudogene     | 1  | 21760811  | 21764051  |            |
| ENSG00000186564 | 4.821592551 | 4.693656882 | protein_coding   | 1  | 47901689  | 47906363  | FOXD2      |
| ENSG00000186566 | 9.432976748 | 9.160532436 | protein_coding   | 17 | 42472652  | 42580802  | GPATCH8    |
| ENSG00000186567 | 7.22677265  | 6.582669759 | protein_coding   | 19 | 45174724  | 45187631  | CEACAM19   |



|                 |             |             |                  |    |           |           |          |
|-----------------|-------------|-------------|------------------|----|-----------|-----------|----------|
| ENSG00000186575 | 11.74439799 | 11.84701192 | protein_coding   | 22 | 29999545  | 30094587  | NF2      |
| ENSG00000186577 | 7.04004079  | 7.966311947 | protein_coding   | 6  | 34214157  | 34217247  | C6orf1   |
| ENSG00000186583 | 1.16343121  | 1.802319292 | protein_coding   | 8  | 145086582 | 145101933 | SPATC1   |
| ENSG00000186591 | 11.26354634 | 10.86254281 | protein_coding   | 7  | 129470572 | 129592789 | UBE2H    |
| ENSG00000186594 | 7.277615649 | 7.869875863 | processed_transc | 17 | 1614805   | 1619504   | MIR22HG  |
| ENSG00000186603 | 7.549958459 | 7.057067116 | protein_coding   | 1  | 45792545  | 45794347  | HPDL     |
| ENSG00000186615 | 5.795854912 | 6.210997888 | protein_coding   | 14 | 55965996  | 56046828  | KTN1-AS1 |
| ENSG00000186625 | 7.292905885 | 7.778838337 | protein_coding   | 6  | 149916009 | 149970108 | KATNA1   |
| ENSG00000186628 | 4.292665995 | 4.468996429 | protein_coding   | 15 | 83424114  | 83474822  | FSD2     |
| ENSG00000186635 | 10.16426552 | 10.30576281 | protein_coding   | 11 | 72396114  | 72504644  | ARAP1    |
| ENSG00000186638 | 7.123655438 | 7.616862529 | protein_coding   | 9  | 34252379  | 34329198  | KIF24    |
| ENSG00000186642 | 6.47626108  | 6.204928885 | protein_coding   | 11 | 72287185  | 72385635  | PDE2A    |
| ENSG00000186645 | 0.499066092 | 0           | pseudogene       | 7  | 76651635  | 76661674  | SPDYE8P  |
| ENSG00000186648 | 2.57521082  | 2.912743273 | protein_coding   | 14 | 24521206  | 24538937  | LRRC16B  |
| ENSG00000186652 | 2.10647801  | 1.802319292 | protein_coding   | 11 | 57154267  | 57158130  | PRG2     |
| ENSG00000186654 | 7.30049066  | 6.775188634 | protein_coding   | 22 | 45064593  | 45133561  | PRR5     |
| ENSG00000186660 | 10.36839913 | 10.25636687 | protein_coding   | 11 | 58346584  | 58388515  | ZFP91    |
| ENSG00000186665 | 6.96088487  | 7.628245414 | protein_coding   | 17 | 65987218  | 65989765  | C17orf58 |
| ENSG00000186666 | 4.800350936 | 5.072639111 | protein_coding   | 12 | 50231573  | 50236912  | BCDIN3D  |
| ENSG00000186676 | 6.023726639 | 6.198834244 | pseudogene       | 7  | 124673507 | 124675355 |          |
| ENSG00000186684 | 7.190493718 | 5.901455548 | protein_coding   | 2  | 127941696 | 127977654 | CYP27C1  |
| ENSG00000186687 | 7.67776266  | 7.41347308  | protein_coding   | 5  | 130506503 | 130541119 | LYRM7    |
| ENSG00000186704 | 3.502389126 | 2.851901313 | pseudogene       | 7  | 76607934  | 76673092  |          |
| ENSG00000186710 | 1.616589159 | 0.950786998 | protein_coding   | 12 | 113587663 | 113597081 | CCDC42B  |
| ENSG00000186714 | 1.16343121  | 0.697730409 | protein_coding   | 11 | 32623792  | 32816204  | CCDC73   |
| ENSG00000186715 | 2.10647801  | 2.039052734 | protein_coding   | 1  | 17081405  | 17096732  | MST1P9   |
| ENSG00000186716 | 10.49485366 | 9.472356449 | protein_coding   | 22 | 23521891  | 23660224  | BCR      |
| ENSG00000186743 | 0           | 0.390640832 | pseudogene       | 6  | 116359919 | 116360658 | TPI1P3   |
| ENSG00000186765 | 3.554067925 | 3.183544561 | protein_coding   | 17 | 79495422  | 79504156  | FSCN2    |
| ENSG00000186766 | 0.499066092 | 0           | protein_coding   | 10 | 129535499 | 129539450 | FOXI2    |
| ENSG00000186767 | 7.845284967 | 7.646273261 | protein_coding   | X  | 62567107  | 62571223  | SPIN4    |
| ENSG00000186777 | 5.637181576 | 5.526427614 | protein_coding   | 4  | 264464    | 299110    | ZNF732   |
| ENSG00000186787 | 3.950976309 | 5.283144778 | protein_coding   | X  | 57144984  | 57147980  | SPIN2B   |
| ENSG00000186790 | 1.16343121  | 0.697730409 | protein_coding   | 1  | 47881744  | 47883723  | FOXE3    |
| ENSG00000186792 | 6.830742851 | 6.610484676 | protein_coding   | 3  | 50330262  | 50336899  | HYAL3    |
| ENSG00000186806 | 5.375152132 | 5.620622115 | protein_coding   | 19 | 51834790  | 51845378  | VSIG10L  |
| ENSG00000186807 | 5.270908378 | 3.133298822 | protein_coding   | 10 | 47746936  | 47763041  | ANXA8L2  |
| ENSG00000186810 | 1.407729925 | 0.697730409 | protein_coding   | X  | 70835766  | 70838367  | CXCR3    |
| ENSG00000186812 | 6.372135143 | 6.664555628 | protein_coding   | 18 | 32820994  | 32839191  | ZNF397   |
| ENSG00000186814 | 7.254372086 | 7.65742733  | protein_coding   | 18 | 32831023  | 32870196  | ZSCAN30  |
| ENSG00000186815 | 11.29876545 | 11.09422652 | protein_coding   | 12 | 113658855 | 113736390 | TPCN1    |
| ENSG00000186818 | 0           | 0.697730409 | protein_coding   | 19 | 55155340  | 55181810  | LILRB4   |
| ENSG00000186827 | 1.960915222 | 2.144285137 | protein_coding   | 1  | 1146706   | 1149518   | TNFRSF4  |
| ENSG00000186831 | 0.499066092 | 0           | protein_coding   | 17 | 18330175  | 18335162  |          |
| ENSG00000186832 | 7.165790811 | 6.874119142 | protein_coding   | 17 | 39766030  | 39769005  | KRT16    |
| ENSG00000186834 | 9.281205548 | 9.390496617 | protein_coding   | 17 | 43224684  | 43229468  | HEXIM1   |
| ENSG00000186838 | 0           | 0.390640832 | protein_coding   | 19 | 40005753  | 40011326  |          |
| ENSG00000186842 | 0           | 1.16600992  | processed_transc | 21 | 33944548  | 33948191  | C21orf77 |
| ENSG00000186847 | 0.499066092 | 0.697730409 | protein_coding   | 17 | 39738531  | 39743173  | KRT14    |
| ENSG00000186854 | 9.05999771  | 8.729786462 | protein_coding   | 2  | 85048774  | 85134132  | C2orf89  |
| ENSG00000186862 | 5.4452544   | 5.085909553 | protein_coding   | 10 | 102767441 | 102790890 | PDZD7    |
| ENSG00000186866 | 8.987843316 | 8.980400792 | protein_coding   | 21 | 46683843  | 46707813  | POFUT2   |
| ENSG00000186868 | 6.907250452 | 6.104183162 | protein_coding   | 17 | 43971748  | 44105703  | MAPT     |
| ENSG00000186871 | 8.219950371 | 8.520929986 | protein_coding   | X  | 71424510  | 71458897  | ERCC6L   |
| ENSG00000186889 | 3.830412367 | 4.468996429 | protein_coding   | 2  | 62727356  | 62739029  | TMEM17   |
| ENSG00000186891 | 4.642199401 | 3.714580548 | protein_coding   | 1  | 1138888   | 1142071   | TNFRSF18 |
| ENSG00000186897 | 5.072559152 | 4.94736961  | protein_coding   | 12 | 49726200  | 49730971  | C1QL4    |
| ENSG00000186907 | 5.741167503 | 5.593003837 | protein_coding   | 11 | 57228022  | 57245007  | RTN4RL2  |
| ENSG00000186908 | 7.471499737 | 7.960920138 | protein_coding   | 12 | 77157368  | 77247476  | ZDHHC17  |
| ENSG00000186912 | 2.35979773  | 0.697730409 | protein_coding   | X  | 69478016  | 69479654  | P2RY4    |
| ENSG00000186918 | 9.093128531 | 9.019827949 | protein_coding   | 8  | 28203102  | 28260218  | ZNF395   |
| ENSG00000186919 | 1.16343121  | 0.950786998 | protein_coding   | 17 | 74075263  | 74078885  | ZACN     |
| ENSG00000186940 | 0.869158192 | 0.697730409 | pseudogene       | 9  | 82006219  | 82006674  | CHCHD2P9 |

|                 |             |             |                  |    |           |           |           |
|-----------------|-------------|-------------|------------------|----|-----------|-----------|-----------|
| ENSG00000186951 | 7.842689815 | 7.462626902 | protein_coding   | 22 | 46546424  | 46639653  | PPARA     |
| ENSG00000186952 | 2.238690726 | 1.925536307 | protein_coding   | 5  | 109624934 | 110074657 | TMEM232   |
| ENSG00000186976 | 3.871730003 | 4.7279204   | protein_coding   | 22 | 43924624  | 44208217  | EFCAB6    |
| ENSG00000186994 | 3.146112541 | 2.334191469 | protein_coding   | 19 | 8387469   | 8408146   | KANK3     |
| ENSG00000186998 | 2.57521082  | 1.925536307 | protein_coding   | 22 | 29601840  | 29655586  | EMID1     |
| ENSG00000187003 | 0.499066092 | 0           | protein_coding   | 9  | 111624603 | 111626035 | ACTL7A    |
| ENSG00000187008 | 2.671945279 | 2.334191469 | processed_transc | 16 | 71963441  | 72033877  | PKD1L3    |
| ENSG00000187010 | 1.616589159 | 2.334191469 | protein_coding   | 1  | 25598884  | 25656936  | RHD       |
| ENSG00000187013 | 2.10647801  | 3.608232228 | protein_coding   | 17 | 59489112  | 59490641  | C17orf82  |
| ENSG00000187017 | 7.289098491 | 5.638744877 | protein_coding   | 1  | 6484848   | 6521430   | ESPN      |
| ENSG00000187045 | 4.821592551 | 4.448594745 | protein_coding   | 22 | 37461476  | 37505603  | TMPRSS6   |
| ENSG00000187049 | 6.604346021 | 6.577981353 | protein_coding   | 11 | 61159159  | 61166335  | TMEM216   |
| ENSG00000187051 | 8.663981856 | 8.987489278 | protein_coding   | 22 | 39925098  | 39928860  | RPS19BP1  |
| ENSG00000187054 | 0.499066092 | 0           | protein_coding   | 4  | 68775103  | 68829858  | TMPRSS11A |
| ENSG00000187066 | 2.671945279 | 3.679994897 | protein_coding   | 11 | 64852451  | 64856847  |           |
| ENSG00000187068 | 0.499066092 | 0.697730409 | protein_coding   | 3  | 184795838 | 184870802 | C3orf70   |
| ENSG00000187079 | 10.40931148 | 10.35180778 | protein_coding   | 11 | 12695969  | 12966298  | TEAD1     |
| ENSG00000187091 | 4.962122459 | 4.841813558 | protein_coding   | 3  | 38048987  | 38071253  | PLCD1     |
| ENSG00000187094 | 0           | 0.390640832 | protein_coding   | 3  | 42299317  | 42307699  | CCK       |
| ENSG00000187097 | 8.295907473 | 8.542748725 | protein_coding   | 14 | 74424713  | 74486102  | ENTPD5    |
| ENSG00000187098 | 7.423680977 | 7.41347308  | protein_coding   | 3  | 69788586  | 70017488  | MITF      |
| ENSG00000187105 | 3.989024711 | 3.679994897 | protein_coding   | 14 | 73945189  | 74025651  | HEATR4    |
| ENSG00000187109 | 12.31530691 | 12.52533275 | protein_coding   | 12 | 76438670  | 76478813  | NAP1L1    |
| ENSG00000187118 | 6.693459083 | 7.154756319 | protein_coding   | 3  | 28283075  | 28366633  | CMC1      |
| ENSG00000187123 | 2.57521082  | 3.411459265 | protein_coding   | 2  | 150186499 | 150330662 | LYPD6     |
| ENSG00000187134 | 3.830412367 | 4.226940739 | protein_coding   | 10 | 4934796   | 5025475   | AKR1C1    |
| ENSG00000187140 | 1.799000381 | 3.027231696 | protein_coding   | 1  | 63788730  | 63790797  | FOXD3     |
| ENSG00000187144 | 1.616589159 | 0.697730409 | protein_coding   | 1  | 16713612  | 16763919  | SPATA21   |
| ENSG00000187145 | 9.473800365 | 10.24753675 | protein_coding   | 1  | 150266289 | 150281414 | MRPS21    |
| ENSG00000187147 | 8.635777795 | 8.722370165 | protein_coding   | 1  | 44870866  | 45117396  | RNF220    |
| ENSG00000187151 | 0.499066092 | 0.390640832 | protein_coding   | 11 | 101761405 | 101787253 | ANGPTL5   |
| ENSG00000187164 | 8.880604615 | 8.936206949 | protein_coding   | 10 | 118643742 | 118886097 | KIAA1598  |
| ENSG00000187172 | 0.499066092 | 0           | pseudogene       | 21 | 10996026  | 11098980  | BAGE2     |
| ENSG00000187185 | 1.407729925 | 0.950786998 | protein_coding   | 16 | 57832098  | 57850850  |           |
| ENSG00000187186 | 1.407729925 | 1.353254395 | protein_coding   | 9  | 34664160  | 34666109  |           |
| ENSG00000187187 | 4.062237333 | 4.585695337 | protein_coding   | 19 | 40502943  | 40537972  | ZNF546    |
| ENSG00000187189 | 7.178195136 | 7.591499486 | protein_coding   | 6  | 116571151 | 116575261 | TSPYL4    |
| ENSG00000187193 | 5.948480845 | 6.827478203 | protein_coding   | 16 | 56716336  | 56718108  | MT1X      |
| ENSG00000187210 | 7.90122817  | 7.022976646 | protein_coding   | 9  | 79034752  | 79122332  | GCNT1     |
| ENSG00000187229 | 0.869158192 | 1.16600992  | processed_transc | 8  | 18578415  | 18591915  |           |
| ENSG00000187231 | 7.827020104 | 7.701200733 | protein_coding   | 2  | 179966483 | 180129517 | SESTD1    |
| ENSG00000187239 | 9.43986141  | 9.466026651 | protein_coding   | 9  | 132649466 | 132805473 | FNBP1     |
| ENSG00000187240 | 8.74542939  | 9.197681135 | protein_coding   | 11 | 102980160 | 103350591 | DYNC2H1   |
| ENSG00000187244 | 9.757590402 | 9.377739515 | protein_coding   | 19 | 45312338  | 45324677  | BCAM      |
| ENSG00000187257 | 8.08373006  | 7.529716161 | protein_coding   | 7  | 77325760  | 77409008  | RSBN1L    |
| ENSG00000187260 | 2.471521042 | 2.334191469 | protein_coding   | 7  | 151072995 | 151107813 | WDR86     |
| ENSG00000187266 | 8.120617457 | 8.53672099  | protein_coding   | 19 | 11487881  | 11495018  | EPOR      |
| ENSG00000187268 | 0           | 0.390640832 | protein_coding   | X  | 13053737  | 13062801  | FAM9C     |
| ENSG00000187288 | 0.499066092 | 0           | protein_coding   | 3  | 9908398   | 9921938   | CIDEC     |
| ENSG00000187325 | 8.3480754   | 8.49131535  | protein_coding   | X  | 77385245  | 77395203  | TAF9B     |
| ENSG00000187372 | 6.814942123 | 6.803579823 | protein_coding   | 5  | 140593509 | 140596993 | PCDHB13   |
| ENSG00000187391 | 3.393122761 | 3.532712221 | protein_coding   | 7  | 77646393  | 79082890  | MAGI2     |
| ENSG00000187446 | 10.21781967 | 9.654843329 | protein_coding   | 15 | 41523037  | 41574043  |           |
| ENSG00000187456 | 5.054730169 | 4.94736961  | protein_coding   | 17 | 34245070  | 34257780  | RDM1      |
| ENSG00000187474 | 0           | 0.697730409 | protein_coding   | 19 | 52298411  | 52329334  | FPR3      |
| ENSG00000187479 | 1.616589159 | 1.16600992  | protein_coding   | 11 | 43946892  | 43965888  | C11orf96  |
| ENSG00000187486 | 2.10647801  | 1.802319292 | protein_coding   | 11 | 17407406  | 17410878  | KCNJ11    |
| ENSG00000187492 | 1.799000381 | 1.667587519 | protein_coding   | 3  | 49828165  | 49837268  | CDHR4     |
| ENSG00000187498 | 0.869158192 | 1.518964905 | protein_coding   | 13 | 110801311 | 110959496 | COL4A1    |
| ENSG00000187504 | 0           | 0.390640832 | pseudogene       | 17 | 49579849  | 49580594  |           |
| ENSG00000187510 | 0           | 0.697730409 | protein_coding   | 12 | 93115281  | 93166231  | PLEKHG7   |
| ENSG00000187513 | 0           | 0.950786998 | protein_coding   | 1  | 35258599  | 35261348  | GJA4      |
| ENSG00000187514 | 13.30730466 | 13.13446442 | protein_coding   | 2  | 232571605 | 232578251 | PTMA      |

|                 |             |             |                |    |           |           |          |
|-----------------|-------------|-------------|----------------|----|-----------|-----------|----------|
| ENSG00000187522 | 8.926668426 | 8.618900187 | protein_coding | 10 | 14880163  | 14913740  | HSPA14   |
| ENSG00000187531 | 7.457998197 | 7.400254612 | protein_coding | 17 | 79869815  | 79876052  | SIRT7    |
| ENSG00000187533 | 0           | 0.390640832 | protein_coding | 4  | 70999333  | 71042516  | C4orf40  |
| ENSG00000187534 | 1.16343121  | 1.16600992  | pseudogene     | 19 | 40448563  | 40449634  |          |
| ENSG00000187535 | 8.653654925 | 8.796890297 | protein_coding | 16 | 1560428   | 1662111   | IFT140   |
| ENSG00000187536 | 0           | 0.950786998 | pseudogene     | 2  | 26032794  | 26033525  | TPM3P7   |
| ENSG00000187546 | 0           | 0.950786998 | protein_coding | 7  | 15239943  | 15601640  | AGMO     |
| ENSG00000187550 | 0.869158192 | 1.667587519 | protein_coding | 19 | 56041100  | 56048456  | SBK2     |
| ENSG00000187554 | 6.244259325 | 5.767861411 | protein_coding | 1  | 223282748 | 223316624 | TLR5     |
| ENSG00000187555 | 11.0376904  | 10.87262791 | protein_coding | 16 | 8985951   | 9058371   | USP7     |
| ENSG00000187556 | 1.799000381 | 1.518964905 | protein_coding | 19 | 13987950  | 13991571  | NANOS3   |
| ENSG00000187566 | 5.175139844 | 5.072639111 | protein_coding | 6  | 18120718  | 18122851  | NHLRC1   |
| ENSG00000187581 | 0.499066092 | 0           | protein_coding | 14 | 93813537  | 93814702  | COX8C    |
| ENSG00000187583 | 6.146643566 | 6.2290532   | protein_coding | 1  | 901877    | 911245    | PLEKHN1  |
| ENSG00000187595 | 2.471521042 | 1.667587519 | protein_coding | 17 | 40177594  | 40215096  | ZNF385C  |
| ENSG00000187601 | 5.869093502 | 6.016808232 | protein_coding | X  | 55478538  | 55479998  | MAGEH1   |
| ENSG00000187605 | 6.616550626 | 6.605885938 | protein_coding | 2  | 74229840  | 74329698  | TET3     |
| ENSG00000187607 | 6.771940731 | 7.188980716 | protein_coding | 17 | 15602891  | 15640874  | ZNF286A  |
| ENSG00000187608 | 9.506959233 | 10.64836849 | protein_coding | 1  | 948803    | 949920    | ISG15    |
| ENSG00000187609 | 7.003331296 | 6.568558581 | protein_coding | 9  | 140201348 | 140317714 | EXD3     |
| ENSG00000187624 | 6.912209543 | 7.619146302 | protein_coding | 17 | 260118    | 264367    | C17orf97 |
| ENSG00000187626 | 4.883502971 | 5.41517489  | protein_coding | 6  | 28212401  | 28227011  | ZKSCAN4  |
| ENSG00000187627 | 0           | 0.390640832 | protein_coding | 2  | 87135076  | 87241104  | RGPD1    |
| ENSG00000187630 | 6.204385613 | 6.57327766  | protein_coding | 14 | 24439148  | 24475617  | DHRS4L2  |
| ENSG00000187634 | 5.4452544   | 4.385599336 | protein_coding | 1  | 860260    | 879955    | SAMD11   |
| ENSG00000187642 | 4.230497448 | 4.226940739 | protein_coding | 1  | 910579    | 917497    | C1orf170 |
| ENSG00000187650 | 5.81716234  | 5.383282767 | protein_coding | 19 | 5904852   | 5910261   | VMAC     |
| ENSG00000187653 | 4.842525946 | 5.212303549 | pseudogene     | 4  | 91759652  | 91760263  | TMSL3    |
| ENSG00000187664 | 1.799000381 | 2.144285137 | protein_coding | 19 | 19366456  | 19373596  | HAPLN4   |
| ENSG00000187667 | 5.575999561 | 5.995870484 | pseudogene     | 15 | 23187728  | 23208737  | WHAMMP3  |
| ENSG00000187672 | 0.869158192 | 1.16600992  | protein_coding | 3  | 55542336  | 56502391  | ERC2     |
| ENSG00000187676 | 6.560798025 | 6.787424764 | protein_coding | 13 | 31774073  | 31906413  | B3GALTL  |
| ENSG00000187678 | 8.023133844 | 6.668971382 | protein_coding | 5  | 141689992 | 141706020 | SPRY4    |
| ENSG00000187682 | 0           | 1.16600992  | protein_coding | X  | 48687283  | 48688548  | ERAS     |
| ENSG00000187686 | 0.499066092 | 1.16600992  | pseudogene     | 11 | 124983057 | 124996677 |          |
| ENSG00000187688 | 8.207901394 | 6.419292172 | protein_coding | 17 | 16318888  | 16340317  | TRPV2    |
| ENSG00000187689 | 2.847891871 | 6.064512706 | protein_coding | 4  | 71384257  | 71398459  | AMTN     |
| ENSG00000187695 | 2.471521042 | 2.242360793 | protein_coding | 3  | 128628717 | 128690173 |          |
| ENSG00000187699 | 2.35979773  | 3.714580548 | protein_coding | 2  | 190744335 | 191068210 | C2orf88  |
| ENSG00000187713 | 8.763378405 | 8.823871996 | protein_coding | 9  | 140098534 | 140100090 | TMEM203  |
| ENSG00000187715 | 0           | 0.390640832 | protein_coding | 3  | 127634075 | 127706514 | KBTBD12  |
| ENSG00000187720 | 8.536501169 | 8.85617872  | protein_coding | 15 | 71389291  | 72075722  | THSD4    |
| ENSG00000187726 | 2.471521042 | 1.667587519 | protein_coding | 11 | 73661364  | 73681411  | DNAJB13  |
| ENSG00000187730 | 2.762599152 | 1.16600992  | protein_coding | 1  | 1950780   | 1962192   | GABRD    |
| ENSG00000187735 | 9.540174158 | 9.55340681  | protein_coding | 8  | 54879112  | 54935089  | TCEA1    |
| ENSG00000187736 | 2.10647801  | 2.579085888 | protein_coding | 2  | 219940039 | 220025587 | NHEJ1    |
| ENSG00000187741 | 9.288851923 | 9.522019224 | protein_coding | 16 | 89803957  | 89883065  | FANCA    |
| ENSG00000187742 | 8.53810609  | 8.616616024 | protein_coding | 9  | 91933421  | 91974557  | SECISBP2 |
| ENSG00000187747 | 0           | 0.390640832 | protein_coding | 11 | 5602107   | 5603114   | OR52B6   |
| ENSG00000187753 | 0.499066092 | 0.390640832 | protein_coding | 9  | 88836224  | 88874572  | C9orf153 |
| ENSG00000187762 | 1.16343121  | 0.697730409 | pseudogene     | 6  | 34991297  | 34991592  |          |
| ENSG00000187764 | 6.96088487  | 6.419292172 | protein_coding | 9  | 91975702  | 92113045  | SEMA4D   |
| ENSG00000187775 | 5.827699195 | 6.746227492 | protein_coding | 17 | 76419778  | 76573476  | DNAH17   |
| ENSG00000187778 | 10.01147814 | 9.990484452 | protein_coding | 12 | 49950327  | 49961936  | MCRS1    |
| ENSG00000187783 | 0           | 0.390640832 | protein_coding | 10 | 45406648  | 45432450  | TMEM72   |
| ENSG00000187790 | 7.484876093 | 7.883239271 | protein_coding | 14 | 45605143  | 45670093  | FANCM    |
| ENSG00000187791 | 0           | 0.697730409 | pseudogene     | 9  | 34889244  | 34895775  | FAM205CP |
| ENSG00000187792 | 5.417620896 | 6.110690132 | protein_coding | 22 | 24083769  | 24093279  | ZNF70    |
| ENSG00000187796 | 6.014532757 | 5.555337277 | protein_coding | 9  | 139256355 | 139268133 | CARD9    |
| ENSG00000187800 | 4.863159938 | 2.721932731 | protein_coding | 1  | 156863490 | 156886226 | PEAR1    |
| ENSG00000187801 | 5.301468762 | 5.94580061  | protein_coding | 1  | 40915774  | 40929390  | ZNF643   |
| ENSG00000187808 | 3.274897671 | 3.279072565 | protein_coding | X  | 118892576 | 118894164 | ANKRD58  |
| ENSG00000187811 | 3.146112541 | 3.081239798 | protein_coding | 11 | 71292956  | 71318487  |          |

|                 |             |             |                  |    |           |           |           |
|-----------------|-------------|-------------|------------------|----|-----------|-----------|-----------|
| ENSG00000187815 | 5.763291843 | 6.077857763 | protein_coding   | 1  | 40942887  | 40962015  | ZNF642    |
| ENSG00000187824 | 3.698846687 | 4.932754837 | protein_coding   | 17 | 10616612  | 10633646  | TMEM220   |
| ENSG00000187833 | 0.869158192 | 0.950786998 | protein_coding   | 2  | 74011316  | 74044274  | C2orf78   |
| ENSG00000187837 | 7.427149666 | 8.713847451 | protein_coding   | 6  | 26055968  | 26056699  | HIST1H1C  |
| ENSG00000187838 | 9.348606364 | 9.915351046 | protein_coding   | 17 | 7293053   | 7307416   | PLSCR3    |
| ENSG00000187840 | 10.19307491 | 10.43226174 | protein_coding   | 8  | 37887859  | 37917883  | EIF4EBP1  |
| ENSG00000187848 | 1.799000381 | 1.353254395 | protein_coding   | 12 | 133195366 | 133198972 | P2RX2     |
| ENSG00000187860 | 6.188122351 | 6.398170093 | protein_coding   | 22 | 30752624  | 30774647  | CCDC157   |
| ENSG00000187866 | 7.348842929 | 7.568048738 | protein_coding   | 9  | 71394964  | 71398609  | FAM122A   |
| ENSG00000187867 | 2.10647801  | 0           | protein_coding   | 19 | 14164179  | 14169971  | PALM3     |
| ENSG00000187870 | 0.869158192 | 1.518964905 | pseudogene       | 17 | 20646646  | 20657841  |           |
| ENSG00000187902 | 1.960915222 | 1.667587519 | protein_coding   | 19 | 55940105  | 55954230  | SHISA7    |
| ENSG00000187904 | 0.499066092 | 0           | processed_transc | 4  | 6997068   | 7000685   |           |
| ENSG00000187905 | 2.238690726 | 1.16600992  | protein_coding   | 22 | 21400249  | 21418457  |           |
| ENSG00000187908 | 0.499066092 | 0.697730409 | protein_coding   | 10 | 124320181 | 124403252 | DMBT1     |
| ENSG00000187912 | 0           | 0.950786998 | protein_coding   | 19 | 14693896  | 14721969  | CLEC17A   |
| ENSG00000187918 | 0           | 0.390640832 | protein_coding   | 11 | 5474638   | 5475707   | OR51I2    |
| ENSG00000187922 | 0           | 0.390640832 | protein_coding   | 9  | 139632619 | 139637808 | LCN10     |
| ENSG00000187939 | 3.077135474 | 2.242360793 | protein_coding   | 17 | 6007      | 31427     | DOC2B     |
| ENSG00000187942 | 3.744048221 | 2.420525079 | protein_coding   | 1  | 22138758  | 22151714  | LDLRAD2   |
| ENSG00000187944 | 1.407729925 | 2.242360793 | protein_coding   | 2  | 197669726 | 197675000 | C2orf66   |
| ENSG00000187951 | 5.909333162 | 5.931169853 | protein_coding   | 15 | 30916697  | 31060329  | ARHGAP11B |
| ENSG00000187952 | 0.869158192 | 0.390640832 | pseudogene       | 1  | 21754795  | 21756030  | HS6ST1P1  |
| ENSG00000187953 | 7.451199747 | 7.365308824 | pseudogene       | 7  | 6749759   | 6793493   | PMS2CL    |
| ENSG00000187954 | 8.441937187 | 8.517261232 | protein_coding   | 8  | 145674965 | 145691060 | CYHR1     |
| ENSG00000187955 | 0.499066092 | 1.802319292 | protein_coding   | 8  | 121072019 | 121384275 | COL14A1   |
| ENSG00000187957 | 7.214780754 | 7.93548844  | protein_coding   | 2  | 230222345 | 230579274 | DNER      |
| ENSG00000187959 | 0           | 0.697730409 | protein_coding   | 17 | 71244588  | 71258491  | CPSF4L    |
| ENSG00000187961 | 8.171138658 | 8.289597152 | protein_coding   | 1  | 895967    | 901095    | KLHL17    |
| ENSG00000187980 | 0.499066092 | 0.390640832 | protein_coding   | 1  | 20487746  | 20503917  | PLA2G2C   |
| ENSG00000187984 | 5.255381949 | 4.508954154 | pseudogene       | 9  | 95571670  | 95650975  | ANKRD19P  |
| ENSG00000187987 | 3.211941663 | 4.202780776 | protein_coding   | 6  | 28399707  | 28411279  | ZSCAN23   |
| ENSG00000187988 | 0           | 0.390640832 | pseudogene       | 9  | 37477146  | 37478314  |           |
| ENSG00000187990 | 4.352265886 | 3.993387124 | protein_coding   | 6  | 26216428  | 26216872  | HIST1H2BG |
| ENSG00000187994 | 1.799000381 | 2.242360793 | protein_coding   | 19 | 39358470  | 39368894  | RINL      |
| ENSG00000187999 | 0           | 0.697730409 | pseudogene       | 2  | 33861569  | 33862492  |           |
| ENSG00000188000 | 0.869158192 | 0           | protein_coding   | 19 | 9296279   | 9299493   | OR7D2     |
| ENSG00000188001 | 2.847891871 | 2.652276565 | protein_coding   | 3  | 188665003 | 189043093 | TPRG1     |
| ENSG00000188002 | 6.585843317 | 6.460630645 | pseudogene       | 5  | 1599035   | 1634120   |           |
| ENSG00000188004 | 3.448790144 | 3.608232228 | protein_coding   | 1  | 159804264 | 159825137 | C1orf204  |
| ENSG00000188010 | 6.25990527  | 6.712401119 | protein_coding   | 2  | 39103103  | 39156213  | MORN2     |
| ENSG00000188013 | 4.6658819   | 4.976162367 | pseudogene       | 17 | 20492371  | 20494013  | MEIS3P2   |
| ENSG00000188015 | 6.94645393  | 7.614575135 | protein_coding   | 1  | 153519805 | 153521848 | S100A3    |
| ENSG00000188021 | 9.194306789 | 9.439133999 | protein_coding   | X  | 56590026  | 56593443  | UBQLN2    |
| ENSG00000188026 | 7.269909329 | 6.988061092 | protein_coding   | 12 | 123955925 | 124018265 | RILPL1    |
| ENSG00000188032 | 1.16343121  | 0.390640832 | protein_coding   | 19 | 14192431  | 14196687  | C19orf67  |
| ENSG00000188033 | 7.132181536 | 6.915587884 | protein_coding   | 19 | 12688775  | 12750912  | ZNF490    |
| ENSG00000188038 | 0           | 0.697730409 | protein_coding   | 16 | 67918781  | 67920275  | NRN1L     |
| ENSG00000188039 | 3.211941663 | 1.802319292 | protein_coding   | 19 | 16830787  | 16928774  | NWD1      |
| ENSG00000188042 | 8.546104025 | 7.402908012 | protein_coding   | 2  | 235401685 | 235405697 | ARL4C     |
| ENSG00000188050 | 0.869158192 | 0.390640832 | protein_coding   | 7  | 122337766 | 122339210 | RNF133    |
| ENSG00000188051 | 2.762599152 | 2.912743273 | protein_coding   | 19 | 17546318  | 17559376  | TMEM221   |
| ENSG00000188060 | 6.716321419 | 6.559073862 | protein_coding   | 1  | 28918712  | 28921955  | RAB42     |
| ENSG00000188064 | 8.46911316  | 5.620622115 | protein_coding   | 22 | 46316242  | 46373009  | WNT7B     |
| ENSG00000188070 | 7.123655438 | 7.527286218 | processed_transc | 11 | 63527364  | 63536113  | C11orf95  |
| ENSG00000188073 | 0           | 0.390640832 | pseudogene       | 7  | 74916804  | 74928928  | PMS2P10   |
| ENSG00000188086 | 1.799000381 | 0.697730409 | protein_coding   | 3  | 46783582  | 46854048  | PRSS45    |
| ENSG00000188089 | 0.869158192 | 1.802319292 | protein_coding   | 15 | 42273780  | 42343388  | PLA2G4E   |
| ENSG00000188092 | 2.10647801  | 2.652276565 | protein_coding   | 1  | 147400506 | 147465753 | GPR89B    |
| ENSG00000188095 | 3.744048221 | 3.748356452 | protein_coding   | 15 | 90303822  | 90321982  | MESP2     |
| ENSG00000188107 | 2.10647801  | 1.925536307 | protein_coding   | 6  | 64429876  | 66417118  | EYS       |
| ENSG00000188112 | 7.811178326 | 6.544728831 | protein_coding   | 6  | 42068856  | 42110357  | C6orf132  |
| ENSG00000188126 | 5.090170488 | 4.961837817 | protein_coding   | 17 | 73584139  | 73622923  | MYO15B    |

|                 |             |             |                  |    |           |           |            |
|-----------------|-------------|-------------|------------------|----|-----------|-----------|------------|
| ENSG00000188130 | 9.768569768 | 10.24679846 | protein_coding   | 22 | 50683879  | 50700254  | MAPK12     |
| ENSG00000188133 | 0.499066092 | 0.390640832 | protein_coding   | 9  | 32783497  | 32787397  | TMEM215    |
| ENSG00000188152 | 3.077135474 | 3.081239798 | protein_coding   | 9  | 99690592  | 99704572  | FAM22G     |
| ENSG00000188153 | 8.020839917 | 7.803146634 | protein_coding   | X  | 107683074 | 107940775 | COL4A5     |
| ENSG00000188157 | 12.43986818 | 12.19390275 | protein_coding   | 1  | 955503    | 991496    | AGRN       |
| ENSG00000188158 | 7.757079669 | 7.546612122 | protein_coding   | X  | 17393543  | 17754114  | NHS        |
| ENSG00000188162 | 0           | 0.390640832 | protein_coding   | 11 | 17568920  | 17668697  | OTOG       |
| ENSG00000188163 | 1.616589159 | 1.16600992  | protein_coding   | 9  | 140138036 | 140142222 | FAM166A    |
| ENSG00000188167 | 5.158541613 | 5.456629825 | protein_coding   | 3  | 33131913  | 33138293  | TMPPE      |
| ENSG00000188171 | 8.000028772 | 8.168519197 | protein_coding   | 19 | 20802745  | 20844406  | ZNF626     |
| ENSG00000188175 | 0.499066092 | 0           | protein_coding   | 7  | 92817899  | 92855837  | HEPACAM2   |
| ENSG00000188176 | 0           | 0.697730409 | protein_coding   | 17 | 4487294   | 4511614   | SMTNL2     |
| ENSG00000188177 | 6.598204782 | 6.338437404 | protein_coding   | 2  | 113033171 | 113097640 | ZC3H6      |
| ENSG00000188185 | 6.912209543 | 7.157901395 | processed_transc | 7  | 39773231  | 39834216  | LINC00265  |
| ENSG00000188186 | 8.695964893 | 8.454700467 | protein_coding   | 7  | 99746530  | 99753567  | C7orf59    |
| ENSG00000188191 | 9.373091386 | 9.519576271 | protein_coding   | 7  | 588834    | 767287    | PRKAR1B    |
| ENSG00000188199 | 0.869158192 | 2.242360793 | protein_coding   | 10 | 81462983  | 81474437  | FAM22B     |
| ENSG00000188206 | 5.360713447 | 6.535085617 | processed_transc | 1  | 245003940 | 245018799 | HNRNPU-AS1 |
| ENSG00000188211 | 8.114176072 | 8.436686098 | protein_coding   | 11 | 17373273  | 17398888  |            |
| ENSG00000188215 | 7.72925009  | 7.287036562 | protein_coding   | 16 | 20869396  | 20911706  | DCUN1D3    |
| ENSG00000188223 | 6.204385613 | 6.525377513 | protein_coding   | 19 | 36239512  | 36245417  | LIN37      |
| ENSG00000188227 | 6.305850085 | 6.758710666 | protein_coding   | 19 | 37997841  | 38034237  | ZNF793     |
| ENSG00000188229 | 12.52093205 | 12.27833076 | protein_coding   | 9  | 140135665 | 140138159 | TUBB4B     |
| ENSG00000188234 | 3.211941663 | 3.453019579 | protein_coding   | 10 | 46321042  | 46349323  | AGAP4      |
| ENSG00000188242 | 7.119373418 | 7.129345795 | protein_coding   | 5  | 466239    | 473213    |            |
| ENSG00000188243 | 7.726437377 | 8.238521194 | protein_coding   | 13 | 76099350  | 76123575  | COMMD6     |
| ENSG00000188263 | 2.35979773  | 1.518964905 | protein_coding   | 22 | 50432942  | 50451088  | IL17REL    |
| ENSG00000188266 | 4.230497448 | 4.385599336 | protein_coding   | 15 | 78799906  | 78829714  | AGPHD1     |
| ENSG00000188277 | 4.352265886 | 4.7279204   | protein_coding   | 15 | 41062159  | 41064647  | C15orf62   |
| ENSG00000188279 | 1.799000381 | 0           | protein_coding   | 10 | 49199649  | 49207835  | FAM25C     |
| ENSG00000188282 | 1.616589159 | 1.518964905 | protein_coding   | 2  | 218899683 | 218955304 | RUFY4      |
| ENSG00000188283 | 5.018397273 | 5.22435463  | protein_coding   | 19 | 37717366  | 37734566  | ZNF383     |
| ENSG00000188290 | 6.766474304 | 7.154756319 | protein_coding   | 1  | 934342    | 935552    | HES4       |
| ENSG00000188295 | 6.068837212 | 6.009862691 | protein_coding   | 1  | 247261406 | 247267674 | ZNF669     |
| ENSG00000188305 | 2.10647801  | 2.242360793 | protein_coding   | 19 | 2274631   | 2282181   | C19orf35   |
| ENSG00000188306 | 1.616589159 | 1.16600992  | protein_coding   | 3  | 169539710 | 169555563 | LRR1Q4     |
| ENSG00000188312 | 6.435508026 | 6.858739095 | protein_coding   | 9  | 95087766  | 95382815  | CENPP      |
| ENSG00000188313 | 9.186141067 | 9.838540929 | protein_coding   | 3  | 146232967 | 146262651 | PLSCR1     |
| ENSG00000188315 | 5.255381949 | 5.072639111 | protein_coding   | 3  | 49306035  | 49315342  | C3orf62    |
| ENSG00000188316 | 4.165528823 | 4.101879561 | protein_coding   | 10 | 118609023 | 118671297 | ENO4       |
| ENSG00000188321 | 7.757079669 | 8.135396417 | protein_coding   | 19 | 9434873   | 9454519   | ZNF559     |
| ENSG00000188322 | 4.517578978 | 4.547834947 | protein_coding   | 16 | 28303840  | 28335170  | SBK1       |
| ENSG00000188338 | 0           | 0.390640832 | processed_transc | 3  | 50242679  | 50258411  | SLC38A3    |
| ENSG00000188342 | 8.085926212 | 7.86795666  | protein_coding   | 13 | 45694650  | 45858237  | GTF2F2     |
| ENSG00000188343 | 6.975172889 | 7.289906366 | protein_coding   | 8  | 94710789  | 94743755  | FAM92A1    |
| ENSG00000188352 | 7.308035767 | 7.575124073 | protein_coding   | 9  | 20658308  | 20995954  | KIAA1797   |
| ENSG00000188365 | 0.869158192 | 0.697730409 | antisense        | 7  | 5459477   | 5462753   |            |
| ENSG00000188368 | 3.211941663 | 2.788380093 | protein_coding   | 19 | 42806284  | 42814973  | PRR19      |
| ENSG00000188372 | 7.478203418 | 6.720932357 | protein_coding   | 7  | 76026835  | 76071388  | ZP3        |
| ENSG00000188375 | 1.407729925 | 1.353254395 | protein_coding   | 12 | 31944123  | 31945175  | H3F3C      |
| ENSG00000188383 | 1.799000381 | 0.697730409 | pseudogene       | 2  | 97746835  | 97748986  |            |
| ENSG00000188385 | 4.131913373 | 3.714580548 | protein_coding   | 10 | 133918175 | 133998313 | JAKMIP3    |
| ENSG00000188386 | 0.499066092 | 0.390640832 | protein_coding   | 9  | 104353897 | 104357283 | PPP3R2     |
| ENSG00000188388 | 0.499066092 | 0           | pseudogene       | 15 | 85783674  | 85790410  |            |
| ENSG00000188389 | 1.407729925 | 0.390640832 | protein_coding   | 2  | 242792033 | 242801060 | PDCD1      |
| ENSG00000188394 | 0           | 0.390640832 | protein_coding   | 9  | 125796806 | 125797975 | GPR21      |
| ENSG00000188396 | 2.57521082  | 1.925536307 | protein_coding   | 1  | 45271585  | 45272957  | TCTEX1D4   |
| ENSG00000188404 | 1.799000381 | 0           | protein_coding   | 1  | 169659808 | 169680839 | SELL       |
| ENSG00000188419 | 8.525216449 | 8.708495073 | protein_coding   | X  | 85116185  | 85302566  | CHM        |
| ENSG00000188428 | 6.835971536 | 7.040122572 | protein_coding   | 6  | 8013800   | 8064647   | MUTED      |
| ENSG00000188451 | 1.407729925 | 2.144285137 | pseudogene       | 6  | 158658368 | 158663829 | SRP72P2    |
| ENSG00000188452 | 0.869158192 | 0.390640832 | protein_coding   | 2  | 182401403 | 182545392 | CERKL      |
| ENSG00000188459 | 0.499066092 | 0           | pseudogene       | X  | 47657325  | 47664188  | WASF4P     |

|                 |             |             |                  |    |           |           |               |
|-----------------|-------------|-------------|------------------|----|-----------|-----------|---------------|
| ENSG00000188460 | 2.471521042 | 2.144285137 | pseudogene       | 1  | 224051428 | 224052553 | ACTBP11       |
| ENSG00000188477 | 0.869158192 | 0.390640832 | sense_intronic   | 16 | 19316203  | 19322269  | CLEC19A       |
| ENSG00000188483 | 8.734271811 | 8.351343215 | protein_coding   | 9  | 131937835 | 131940540 | IER5L         |
| ENSG00000188486 | 10.69874479 | 11.16510226 | protein_coding   | 11 | 118964564 | 118966177 | H2AFX         |
| ENSG00000188488 | 6.171673665 | 2.971122874 | protein_coding   | 14 | 95027779  | 95059457  | SERPINA5      |
| ENSG00000188493 | 7.254372086 | 6.889336956 | protein_coding   | 19 | 41246761  | 41256408  | C19orf54      |
| ENSG00000188501 | 1.799000381 | 2.242360793 | protein_coding   | 15 | 66839517  | 66858317  | LCTL          |
| ENSG00000188505 | 0.869158192 | 0           | protein_coding   | 19 | 39687604  | 39692522  | NCCRP1        |
| ENSG00000188508 | 0           | 1.518964905 | protein_coding   | 19 | 35978226  | 35986460  | KRTDAP        |
| ENSG00000188511 | 0           | 0.390640832 | protein_coding   | 22 | 49808176  | 50051190  | C22orf34      |
| ENSG00000188512 | 0           | 0.390640832 | pseudogene       | 8  | 33827079  | 33827397  |               |
| ENSG00000188522 | 9.432113851 | 10.10163939 | protein_coding   | 17 | 18872102  | 18908117  | FAM83G        |
| ENSG00000188523 | 0           | 0.950786998 | protein_coding   | 9  | 135285430 | 135448704 | C9orf171      |
| ENSG00000188525 | 0           | 0.390640832 | antisense        | 2  | 10143286  | 10146158  |               |
| ENSG00000188529 | 10.10215133 | 10.29008203 | protein_coding   | 1  | 24291294  | 24307417  | SRSF10        |
| ENSG00000188542 | 4.923348194 | 4.932754837 | protein_coding   | 2  | 241499471 | 241503431 | DUSP28        |
| ENSG00000188549 | 10.59192395 | 11.1941149  | protein_coding   | 15 | 40623653  | 40633168  | C15orf52      |
| ENSG00000188554 | 10.35161244 | 10.55214769 | protein_coding   | 17 | 41322511  | 41363706  | NBR1          |
| ENSG00000188559 | 8.340737341 | 8.628000846 | protein_coding   | 20 | 20370196  | 20693266  | RALGAPA2      |
| ENSG00000188566 | 10.12368915 | 10.00932506 | protein_coding   | 9  | 140100119 | 140113813 | NDOR1         |
| ENSG00000188573 | 0           | 0.390640832 | pseudogene       | 5  | 167956510 | 167957508 | FBLL1         |
| ENSG00000188596 | 2.762599152 | 2.721932731 | protein_coding   | 12 | 96883349  | 97269333  | C12orf55      |
| ENSG00000188599 | 6.244259325 | 6.530239731 | protein_coding   | 16 | 15198178  | 15225458  | NPIPP1        |
| ENSG00000188603 | 5.899377978 | 6.3217081   | protein_coding   | 16 | 28477983  | 28506896  | CLN3          |
| ENSG00000188610 | 5.054730169 | 4.903073497 | protein_coding   | 1  | 120837272 | 120855681 | FAM72B        |
| ENSG00000188611 | 1.16343121  | 0.950786998 | protein_coding   | 10 | 51884446  | 52039568  | ASAH2         |
| ENSG00000188612 | 9.305909516 | 9.619347638 | protein_coding   | 17 | 73163825  | 73179098  | SUMO2         |
| ENSG00000188613 | 6.749949642 | 6.858739095 | protein_coding   | 10 | 120789228 | 120793854 | NANOS1        |
| ENSG00000188626 | 0.499066092 | 1.16600992  | protein_coding   | 15 | 28947100  | 28983530  |               |
| ENSG00000188629 | 6.155035276 | 7.073814954 | protein_coding   | 19 | 9435021   | 9493291   | ZNF559-ZNF177 |
| ENSG00000188636 | 9.44329146  | 9.732839523 | protein_coding   | 22 | 44888452  | 44894178  | LDOC1L        |
| ENSG00000188641 | 7.671926738 | 7.394933125 | protein_coding   | 1  | 97543299  | 98386605  | DPYD          |
| ENSG00000188643 | 11.24499497 | 11.24601996 | protein_coding   | 1  | 153579362 | 153585644 | S100A16       |
| ENSG00000188647 | 8.617676359 | 8.975952737 | protein_coding   | 9  | 72324438  | 72374875  | PTAR1         |
| ENSG00000188649 | 0.499066092 | 0.950786998 | protein_coding   | 10 | 97709744  | 97792441  | CC2D2B        |
| ENSG00000188659 | 2.762599152 | 3.570966319 | protein_coding   | 15 | 82555151  | 82577271  | FAM154B       |
| ENSG00000188660 | 5.899377978 | 6.174194902 | lincRNA          | 21 | 44866481  | 44873773  | LINC00319     |
| ENSG00000188662 | 0           | 0.390640832 | pseudogene       | 17 | 48248789  | 48258539  | HILS1         |
| ENSG00000188672 | 2.847891871 | 2.788380093 | protein_coding   | 1  | 25688741  | 25756683  | RHCE          |
| ENSG00000188676 | 2.35979773  | 2.420525079 | protein_coding   | 8  | 39792133  | 39873910  | IDO2          |
| ENSG00000188677 | 6.984620223 | 6.945015469 | protein_coding   | 22 | 44395091  | 44565106  | PARVB         |
| ENSG00000188681 | 5.83815965  | 6.610484676 | pseudogene       | 21 | 9907190   | 9968585   |               |
| ENSG00000188682 | 0           | 1.16600992  | protein_coding   | 11 | 30964749  | 31391357  | DCDC1         |
| ENSG00000188686 | 3.652182994 | 3.608232228 | protein_coding   | 8  | 145490549 | 145492470 | SCXA          |
| ENSG00000188687 | 2.238690726 | 3.64455972  | protein_coding   | 2  | 74443369  | 74570541  | SLC4A5        |
| ENSG00000188690 | 8.631273684 | 8.966118473 | protein_coding   | 10 | 127477146 | 127511817 | UROS          |
| ENSG00000188693 | 1.407729925 | 0.390640832 | processed_transc | 7  | 91763918  | 91810039  |               |
| ENSG00000188706 | 9.834707333 | 9.80533094  | protein_coding   | X  | 128937264 | 128977885 | ZDHC9         |
| ENSG00000188707 | 8.883132512 | 7.964516916 | protein_coding   | 7  | 150026938 | 150029808 | C7orf29       |
| ENSG00000188710 | 2.762599152 | 2.652276565 | protein_coding   | 9  | 133768815 | 133769225 | QRFP          |
| ENSG00000188712 | 0.499066092 | 0.390640832 | pseudogene       | 9  | 107484616 | 107485552 |               |
| ENSG00000188716 | 0.499066092 | 0           | protein_coding   | 10 | 76797594  | 76818272  | DUPD1         |
| ENSG00000188725 | 9.036344956 | 8.634788863 | protein_coding   | 5  | 60453536  | 60458301  | C5orf43       |
| ENSG00000188732 | 4.734682531 | 6.167968749 | protein_coding   | 7  | 23719749  | 23742868  | C7orf46       |
| ENSG00000188735 | 9.148812342 | 7.907733332 | protein_coding   | 12 | 122150658 | 122220907 | TMEM120B      |
| ENSG00000188738 | 3.393122761 | 0.950786998 | protein_coding   | 2  | 186603355 | 186698017 | FSIP2         |
| ENSG00000188739 | 3.393122761 | 2.721932731 | protein_coding   | 1  | 235294498 | 235324772 | RBM34         |
| ENSG00000188747 | 4.999881834 | 4.976162367 | protein_coding   | 9  | 140317802 | 140328858 | NOXA1         |
| ENSG00000188760 | 4.842525946 | 5.200150955 | protein_coding   | 2  | 220408385 | 220415317 | TMEM198       |
| ENSG00000188761 | 1.616589159 | 1.667587519 | protein_coding   | 1  | 114420790 | 114430169 | BCL2L15       |
| ENSG00000188763 | 6.171673665 | 5.878761167 | protein_coding   | 7  | 72848109  | 72850450  | FZD9          |
| ENSG00000188765 | 0           | 0.390640832 | pseudogene       | 2  | 3665138   | 3665347   | TMSB4XP2      |
| ENSG00000188766 | 3.274897671 | 3.368666104 | protein_coding   | 19 | 38880840  | 38886868  | SPRED3        |

|                 |             |             |                  |    |           |           |           |
|-----------------|-------------|-------------|------------------|----|-----------|-----------|-----------|
| ENSG00000188770 | 0.499066092 | 0.390640832 | protein_coding   | 1  | 203463271 | 203477992 | OPTC      |
| ENSG00000188771 | 0.499066092 | 0.950786998 | protein_coding   | 11 | 112118876 | 112131583 | C11orf34  |
| ENSG00000188779 | 1.799000381 | 1.802319292 | protein_coding   | 15 | 68112042  | 68126899  | SKOR1     |
| ENSG00000188783 | 0.499066092 | 1.518964905 | protein_coding   | 1  | 203444956 | 203460480 | PRELP     |
| ENSG00000188784 | 0           | 0.390640832 | protein_coding   | 1  | 20246502  | 20250110  | PLA2G2E   |
| ENSG00000188785 | 7.23866569  | 7.138927266 | protein_coding   | 19 | 57901218  | 57913917  | ZNF548    |
| ENSG00000188786 | 6.733233509 | 6.673373662 | protein_coding   | 1  | 38279851  | 38325292  | MTF1      |
| ENSG00000188800 | 0           | 0.390640832 | protein_coding   | 1  | 40711619  | 40717363  | TMCO2     |
| ENSG00000188801 | 1.16343121  | 1.353254395 | pseudogene       | 9  | 99959537  | 99961910  | ZNF322P1  |
| ENSG00000188807 | 8.753741308 | 8.675956977 | protein_coding   | 1  | 9648932   | 9674935   | TMEM201   |
| ENSG00000188811 | 6.693459083 | 6.349483465 | protein_coding   | 13 | 39612443  | 39625205  | NHLRC3    |
| ENSG00000188818 | 8.002356002 | 8.157562549 | protein_coding   | 5  | 710471    | 851101    | ZDHC11    |
| ENSG00000188820 | 0           | 0.697730409 | protein_coding   | 6  | 116782533 | 116784934 | FAM26F    |
| ENSG00000188822 | 0.499066092 | 0.390640832 | protein_coding   | 1  | 24197016  | 24285549  | CNR2      |
| ENSG00000188825 | 5.346128795 | 5.175534283 | protein_coding   | 17 | 41447213  | 41466266  |           |
| ENSG00000188827 | 8.502378699 | 8.519708104 | protein_coding   | 16 | 3631182   | 3661599   | SLX4      |
| ENSG00000188828 | 0.499066092 | 0           | protein_coding   | X  | 102962152 | 102983583 | GLRA4     |
| ENSG00000188833 | 1.616589159 | 1.16600992  | protein_coding   | 9  | 140328816 | 140336268 | ENTPD8    |
| ENSG00000188846 | 10.89875151 | 11.22742878 | protein_coding   | 3  | 40498783  | 40506549  | RPL14     |
| ENSG00000188850 | 0           | 0.390640832 | pseudogene       | 5  | 43336266  | 43348818  |           |
| ENSG00000188856 | 0.499066092 | 0.697730409 | pseudogene       | 8  | 81471105  | 81471992  | RPSAP47   |
| ENSG00000188868 | 5.752272083 | 6.044260771 | protein_coding   | 19 | 12428291  | 12444534  | ZNF563    |
| ENSG00000188869 | 2.10647801  | 1.518964905 | protein_coding   | 15 | 81623558  | 81666554  | TMC3      |
| ENSG00000188873 | 1.616589159 | 2.652276565 | pseudogene       | 8  | 48068741  | 48069394  | RPL10AP2  |
| ENSG00000188878 | 8.120617457 | 8.88967084  | protein_coding   | 17 | 73905925  | 73937119  | FBF1      |
| ENSG00000188883 | 1.407729925 | 1.16600992  | protein_coding   | 7  | 139137436 | 139168458 | KLRG2     |
| ENSG00000188886 | 2.671945279 | 0.950786998 | protein_coding   | 2  | 96789589  | 96804175  | ASTL      |
| ENSG00000188888 | 1.960915222 | 2.971122874 | protein_coding   | 17 | 36481493  | 36499730  | GPR179    |
| ENSG00000188895 | 9.263851576 | 9.167571071 | protein_coding   | 17 | 38278790  | 38293040  | MSL1      |
| ENSG00000188897 | 4.981125677 | 4.903073497 | protein_coding   | 16 | 11536047  | 11585611  |           |
| ENSG00000188910 | 8.027710784 | 2.334191469 | protein_coding   | 1  | 35246790  | 35251970  | GJB3      |
| ENSG00000188916 | 1.960915222 | 2.851901313 | protein_coding   | 10 | 128933694 | 128994422 | FAM196A   |
| ENSG00000188917 | 8.45218826  | 8.40394723  | protein_coding   | X  | 100264335 | 100307105 | TRMT2B    |
| ENSG00000188921 | 5.729976786 | 5.43605125  | protein_coding   | 9  | 20995306  | 21031635  | PTPLAD2   |
| ENSG00000188931 | 5.672682881 | 5.656642807 | protein_coding   | 1  | 161334521 | 161337664 | C1orf192  |
| ENSG00000188933 | 5.575999561 | 6.646756201 | processed_transc | 17 | 16689803  | 16719854  |           |
| ENSG00000188938 | 8.316627558 | 8.453421159 | protein_coding   | 9  | 96208776  | 96215874  | FAM120AOS |
| ENSG00000188958 | 0.499066092 | 1.925536307 | protein_coding   | 3  | 190984957 | 191048325 | UTS2D     |
| ENSG00000188959 | 2.35979773  | 2.334191469 | protein_coding   | 9  | 112952328 | 112970469 | C9orf152  |
| ENSG00000188971 | 7.341508784 | 7.541804862 | protein_coding   | 2  | 69686414  | 69693664  |           |
| ENSG00000188976 | 10.46141213 | 10.30965652 | protein_coding   | 1  | 879584    | 894689    | NOC2L     |
| ENSG00000188981 | 3.077135474 | 2.851901313 | protein_coding   | 4  | 3246096   | 3273465   | C4orf44   |
| ENSG00000188985 | 1.407729925 | 1.667587519 | pseudogene       | 18 | 23749724  | 23751313  |           |
| ENSG00000188986 | 10.89092254 | 10.38975587 | protein_coding   | 9  | 140149625 | 140167998 | COBRA1    |
| ENSG00000188987 | 0.869158192 | 0.950786998 | protein_coding   | 6  | 26188938  | 26189304  | HIST1H4D  |
| ENSG00000188992 | 0           | 0.950786998 | protein_coding   | 21 | 15481134  | 15583166  | LIPI      |
| ENSG00000188993 | 1.16343121  | 2.039052734 | protein_coding   | 4  | 52859868  | 52883786  | LRR66     |
| ENSG00000188994 | 8.045874708 | 8.242970684 | protein_coding   | 6  | 87862551  | 87973914  | ZNF292    |
| ENSG00000188996 | 2.671945279 | 1.802319292 | protein_coding   | 6  | 655939    | 656963    | HUS1B     |
| ENSG00000188997 | 6.96088487  | 6.712401119 | protein_coding   | 11 | 77882295  | 77899868  | KCTD21    |
| ENSG00000189001 | 3.335220907 | 3.133298822 | protein_coding   | 19 | 36014269  | 36019253  | SBSN      |
| ENSG00000189007 | 7.654275977 | 7.756190105 | protein_coding   | 6  | 143747078 | 143771810 | ADAT2     |
| ENSG00000189011 | 0           | 0.697730409 | pseudogene       | 7  | 74702428  | 74714647  |           |
| ENSG00000189014 | 0           | 0.390640832 | pseudogene       | 10 | 47379727  | 47420712  | FAM35B2   |
| ENSG00000189042 | 6.372135143 | 6.646756201 | protein_coding   | 19 | 37178530  | 37214248  | ZNF567    |
| ENSG00000189043 | 9.293610409 | 9.654843329 | protein_coding   | 7  | 10971578  | 10979883  | NDUFA4    |
| ENSG00000189045 | 0.499066092 | 1.802319292 | protein_coding   | 5  | 74907301  | 74967671  | ANKDD1B   |
| ENSG00000189046 | 7.517784241 | 7.829026491 | protein_coding   | 12 | 109525993 | 109531436 | ALKBH2    |
| ENSG00000189050 | 7.140657543 | 7.213370937 | protein_coding   | 17 | 58029601  | 58042122  | RNFT1     |
| ENSG00000189051 | 1.407729925 | 1.667587519 | protein_coding   | 17 | 8294022   | 8301144   | RNF222    |
| ENSG00000189052 | 0.499066092 | 0           | protein_coding   | 19 | 49547063  | 49548566  | CGB5      |
| ENSG00000189056 | 1.616589159 | 0.390640832 | protein_coding   | 7  | 103112231 | 103629963 | RELN      |
| ENSG00000189057 | 8.360827871 | 9.119178324 | protein_coding   | 11 | 58874658  | 58894883  | FAM111B   |

|                 |             |             |                  |    |           |           |           |
|-----------------|-------------|-------------|------------------|----|-----------|-----------|-----------|
| ENSG00000189060 | 11.08402209 | 10.46437136 | protein_coding   | 22 | 38201114  | 38203442  | H1FO      |
| ENSG00000189067 | 10.79819868 | 9.943417103 | protein_coding   | 16 | 11641582  | 11680806  | LITAF     |
| ENSG00000189068 | 0           | 0.390640832 | protein_coding   | 19 | 54544079  | 54567207  | VSTM1     |
| ENSG00000189077 | 7.612231145 | 7.505230566 | pseudogene       | 7  | 75616155  | 75623977  | TMEM120A  |
| ENSG00000189079 | 8.502378699 | 8.38394126  | protein_coding   | 12 | 46123448  | 46301823  | ARID2     |
| ENSG00000189089 | 1.407729925 | 1.16600992  | pseudogene       | 21 | 37422512  | 37423675  | RIMKLBP1  |
| ENSG00000189091 | 11.80447699 | 11.92765146 | protein_coding   | 16 | 70557691  | 70608820  | SF3B3     |
| ENSG00000189108 | 2.238690726 | 1.925536307 | protein_coding   | X  | 103810996 | 105012102 | IL1RAPL2  |
| ENSG00000189114 | 7.976547636 | 7.307006333 | protein_coding   | 19 | 45682003  | 45685057  | BLOC1S3   |
| ENSG00000189120 | 8.043616684 | 7.026422172 | protein_coding   | 17 | 45922280  | 45933240  | SP6       |
| ENSG00000189127 | 2.35979773  | 0.697730409 | protein_coding   | 5  | 79852574  | 79866307  | ANKRD34B  |
| ENSG00000189129 | 0.869158192 | 0.390640832 | protein_coding   | 10 | 81891477  | 81905115  | PLAC9     |
| ENSG00000189136 | 3.871730003 | 4.17820932  | pseudogene       | 15 | 85070012  | 85114447  | UBE2Q2P1  |
| ENSG00000189139 | 0.869158192 | 1.16600992  | protein_coding   | 14 | 44973545  | 44976482  | FSCB      |
| ENSG00000189143 | 10.80554674 | 7.786986696 | protein_coding   | 7  | 73213872  | 73247017  | CLDN4     |
| ENSG00000189144 | 4.903563137 | 5.294620694 | protein_coding   | 19 | 38229203  | 38307940  | ZNF573    |
| ENSG00000189145 | 0.499066092 | 0           | pseudogene       | X  | 40767237  | 40767644  |           |
| ENSG00000189149 | 3.077135474 | 3.32456471  | lincRNA          | 16 | 21312170  | 21329912  | CRYM-AS1  |
| ENSG00000189152 | 0           | 0.390640832 | protein_coding   | 17 | 19030782  | 19062148  |           |
| ENSG00000189157 | 2.35979773  | 1.802319292 | protein_coding   | 4  | 77135193  | 77232282  | FAM47E    |
| ENSG00000189159 | 10.33555133 | 10.10693785 | protein_coding   | 17 | 73131343  | 73150778  | HN1       |
| ENSG00000189164 | 5.752272083 | 5.824376633 | protein_coding   | 19 | 37862059  | 37883968  | ZNF527    |
| ENSG00000189166 | 0.499066092 | 0           | pseudogene       | 7  | 57059595  | 57076856  | TNRC18C   |
| ENSG00000189167 | 0.499066092 | 0           | protein_coding   | 13 | 32877837  | 32889481  | ZAR1L     |
| ENSG00000189171 | 8.655134734 | 9.066597822 | protein_coding   | 1  | 153591263 | 153606873 | S100A13   |
| ENSG00000189180 | 8.429884808 | 9.539005037 | protein_coding   | 10 | 38299578  | 38356282  | ZNF33A    |
| ENSG00000189190 | 7.720795447 | 7.472765069 | protein_coding   | 19 | 53268747  | 53290034  | ZNF600    |
| ENSG00000189195 | 2.10647801  | 2.242360793 | protein_coding   | 1  | 92545862  | 92613393  | BTBD8     |
| ENSG00000189212 | 2.238690726 | 2.144285137 | pseudogene       | 7  | 35119601  | 35225934  | DPY19L2P1 |
| ENSG00000189221 | 9.556895063 | 10.51645069 | protein_coding   | X  | 43515467  | 43606068  | MAOA      |
| ENSG00000189223 | 8.817245731 | 9.356680039 | processed_transc | 2  | 113969099 | 114024587 |           |
| ENSG00000189227 | 5.316509574 | 5.674321415 | protein_coding   | 15 | 67813406  | 67819628  | C15orf61  |
| ENSG00000189233 | 0.499066092 | 0           | protein_coding   | 8  | 27879481  | 27941388  | C8orf80   |
| ENSG00000189238 | 3.077135474 | 3.906303962 | lincRNA          | 12 | 127210816 | 127230798 |           |
| ENSG00000189241 | 9.713528165 | 9.506065582 | protein_coding   | 6  | 116597741 | 116601066 | TSPYL1    |
| ENSG00000189266 | 8.557227164 | 9.002437654 | protein_coding   | 1  | 24285599  | 24289952  | PNRC2     |
| ENSG00000189269 | 3.830412367 | 4.29708397  | protein_coding   | 22 | 23950639  | 23974508  | C22orf43  |
| ENSG00000189280 | 4.689181911 | 1.667587519 | protein_coding   | 1  | 35220648  | 35224113  | GJB5      |
| ENSG00000189283 | 3.004694206 | 3.493416095 | protein_coding   | 3  | 59735036  | 61237133  | FHIT      |
| ENSG00000189292 | 0.499066092 | 0.390640832 | protein_coding   | 2  | 279565    | 288851    | FAM150B   |
| ENSG00000189298 | 5.613019223 | 6.051043053 | protein_coding   | 6  | 28317691  | 28335336  | ZKSCAN3   |
| ENSG00000189306 | 9.904803739 | 9.890041731 | protein_coding   | 22 | 42905974  | 42915808  | RRP7A     |
| ENSG00000189308 | 7.471499737 | 7.410839058 | protein_coding   | 4  | 83831126  | 83934079  | LIN54     |
| ENSG00000189316 | 0.499066092 | 0           | antisense        | 7  | 64348905  | 64350478  |           |
| ENSG00000189319 | 8.826469148 | 8.567793748 | protein_coding   | 10 | 126307861 | 126432838 | FAM53B    |
| ENSG00000189320 | 0           | 0.697730409 | protein_coding   | 7  | 135413096 | 135433594 | FAM180A   |
| ENSG00000189332 | 3.911897206 | 3.64455972  | protein_coding   | 11 | 18230685  | 18236109  |           |
| ENSG00000189334 | 5.672682881 | 1.353254395 | protein_coding   | 1  | 153586731 | 153589462 | S100A14   |
| ENSG00000189337 | 7.066972635 | 6.668971382 | protein_coding   | 1  | 14925200  | 15444539  | KAZN      |
| ENSG00000189339 | 8.874265427 | 9.237617989 | protein_coding   | 1  | 1592939   | 1624167   | SLC35E2B  |
| ENSG00000189343 | 4.165528823 | 4.127774132 | pseudogene       | 17 | 19349246  | 19350169  |           |
| ENSG00000189350 | 1.960915222 | 2.039052734 | protein_coding   | 2  | 29179477  | 29275096  | FAM179A   |
| ENSG00000189362 | 6.541724534 | 6.434933235 | protein_coding   | 2  | 191369068 | 191399448 | TMEM194B  |
| ENSG00000189366 | 3.652182994 | 2.721932731 | protein_coding   | 3  | 125648118 | 125655882 | ALG1L     |
| ENSG00000189367 | 0.499066092 | 0.390640832 | protein_coding   | 6  | 127761488 | 127780536 | KIAA0408  |
| ENSG00000189375 | 0.869158192 | 1.518964905 | protein_coding   | 17 | 18538842  | 18547740  | TBC1D28   |
| ENSG00000189376 | 5.054730169 | 5.283144778 | protein_coding   | 8  | 124232196 | 124253638 | C8orf76   |
| ENSG00000189377 | 0.869158192 | 0.390640832 | protein_coding   | 19 | 42932696  | 42947136  | CXCL17    |
| ENSG00000189401 | 0.499066092 | 0.390640832 | protein_coding   | X  | 69282341  | 69284029  | OTUD6A    |
| ENSG00000189403 | 10.61605933 | 10.30576281 | protein_coding   | 13 | 31032884  | 31191734  | HMGB1     |
| ENSG00000189409 | 2.57521082  | 3.532712221 | protein_coding   | 1  | 1567474   | 1570639   | MMP23B    |
| ENSG00000189410 | 6.220467583 | 6.505763096 | protein_coding   | 1  | 21046225  | 21059330  | SH2D5     |
| ENSG00000189419 | 0.499066092 | 1.353254395 | processed_transc | 15 | 100884662 | 100890438 |           |



|                 |             |             |                  |    |           |           |           |
|-----------------|-------------|-------------|------------------|----|-----------|-----------|-----------|
| ENSG00000189423 | 1.616589159 | 3.232099092 | pseudogene       | 17 | 20327905  | 20334324  | USP32P3   |
| ENSG00000189431 | 2.762599152 | 0.950786998 | pseudogene       | 11 | 13030696  | 13032647  | RASSF10   |
| ENSG00000189433 | 1.799000381 | 0.697730409 | protein_coding   | 1  | 35225342  | 35229325  | GJB4      |
| ENSG00000196072 | 7.933293789 | 8.194786822 | protein_coding   | 10 | 102033713 | 102046439 | BLOC1S2   |
| ENSG00000196074 | 6.364918751 | 7.852510423 | protein_coding   | 20 | 58438621  | 58508710  | SYCP2     |
| ENSG00000196081 | 7.481543613 | 7.454976247 | protein_coding   | 19 | 23404401  | 23433162  | ZNF724P   |
| ENSG00000196083 | 9.223526019 | 9.111898978 | protein_coding   | 3  | 190231840 | 190375843 | IL1RAP    |
| ENSG00000196092 | 0.869158192 | 0.390640832 | protein_coding   | 9  | 36833272  | 37034476  | PAX5      |
| ENSG00000196104 | 1.16343121  | 0           | protein_coding   | 4  | 167654535 | 168155947 | SPOCK3    |
| ENSG00000196109 | 5.707331524 | 5.886365696 | protein_coding   | 19 | 22361903  | 22379753  | ZNF676    |
| ENSG00000196110 | 5.879259127 | 5.516660875 | protein_coding   | 19 | 9404951   | 9415795   | ZNF699    |
| ENSG00000196114 | 1.407729925 | 0.697730409 | pseudogene       | 6  | 34544035  | 34544433  |           |
| ENSG00000196116 | 7.740446424 | 7.485338407 | protein_coding   | 9  | 100174232 | 100258407 | TDRD7     |
| ENSG00000196118 | 3.448790144 | 4.15321211  | protein_coding   | 16 | 30768744  | 30774031  | C16orf93  |
| ENSG00000196123 | 7.615275323 | 7.999999944 | protein_coding   | 16 | 67209505  | 67217943  | KIAA0895L |
| ENSG00000196126 | 0.499066092 | 0           | protein_coding   | 6  | 32546546  | 32557625  | HLA-DRB1  |
| ENSG00000196132 | 0           | 0.390640832 | protein_coding   | 20 | 62783144  | 62873604  | MYT1      |
| ENSG00000196136 | 5.625150983 | 3.411459265 | protein_coding   | 14 | 95058395  | 95090983  | SERPINA3  |
| ENSG00000196139 | 5.4452544   | 4.841813558 | protein_coding   | 10 | 5077549   | 5149878   | AKR1C3    |
| ENSG00000196141 | 10.95028817 | 10.25600002 | protein_coding   | 2  | 201170604 | 201343253 | SPATS2L   |
| ENSG00000196150 | 5.431503808 | 6.434933235 | protein_coding   | 8  | 146076632 | 146127553 | ZNF250    |
| ENSG00000196151 | 6.421663777 | 6.414040573 | protein_coding   | 2  | 160092304 | 160143310 | WDSUB1    |
| ENSG00000196152 | 6.335686705 | 6.287656023 | protein_coding   | 9  | 130186661 | 130207651 | ZNF79     |
| ENSG00000196154 | 6.856698814 | 6.343971006 | protein_coding   | 1  | 153516089 | 153522612 | S100A4    |
| ENSG00000196155 | 9.008829705 | 9.717467399 | protein_coding   | 16 | 67311413  | 67323402  | PLEKHG4   |
| ENSG00000196159 | 5.389447744 | 6.223059835 | protein_coding   | 4  | 126237554 | 126414087 | FAT4      |
| ENSG00000196167 | 0.499066092 | 0           | protein_coding   | 11 | 111164114 | 111175770 | C11orf92  |
| ENSG00000196172 | 7.304268146 | 7.332282157 | protein_coding   | 19 | 23921997  | 23941693  | ZNF681    |
| ENSG00000196176 | 0.869158192 | 0.697730409 | protein_coding   | 6  | 26021907  | 26044555  | HIST1H4A  |
| ENSG00000196177 | 7.527512071 | 8.549948921 | protein_coding   | 10 | 124768495 | 124817827 | ACADSB    |
| ENSG00000196182 | 9.032934112 | 8.721307575 | protein_coding   | 1  | 36805225  | 36851497  | STK40     |
| ENSG00000196183 | 0.499066092 | 0.950786998 | pseudogene       | 14 | 105302331 | 105303221 | RPS2P4    |
| ENSG00000196187 | 9.263851576 | 9.701929717 | protein_coding   | 1  | 226033237 | 226070069 | TMEM63A   |
| ENSG00000196188 | 0.869158192 | 1.16600992  | protein_coding   | 1  | 206317459 | 206332104 | CTSE      |
| ENSG00000196189 | 4.6658819   | 3.64455972  | protein_coding   | 1  | 156117157 | 156147543 | SEMA4A    |
| ENSG00000196193 | 0.869158192 | 1.353254395 | pseudogene       | 5  | 10201621  | 10201960  |           |
| ENSG00000196196 | 1.799000381 | 1.16600992  | protein_coding   | 9  | 35906189  | 35907138  | HRCT1     |
| ENSG00000196199 | 8.622223055 | 8.879228285 | protein_coding   | 13 | 20207788  | 20247596  | MPHOSPH8  |
| ENSG00000196204 | 7.671926738 | 7.879433769 | pseudogene       | 7  | 5013619   | 5080306   | RNF216P1  |
| ENSG00000196205 | 4.491309013 | 4.710890357 | pseudogene       | 9  | 135894816 | 135896553 | EEF1A1P5  |
| ENSG00000196208 | 5.107569429 | 5.294620694 | protein_coding   | 2  | 11674242  | 11782914  | GREB1     |
| ENSG00000196209 | 1.16343121  | 1.16600992  | protein_coding   | 20 | 1451386   | 1472233   | SIRPB2    |
| ENSG00000196214 | 8.243750574 | 8.101495266 | protein_coding   | 19 | 52772824  | 52795977  | ZNF766    |
| ENSG00000196218 | 2.10647801  | 1.925536307 | protein_coding   | 19 | 38924340  | 39078204  | RYR1      |
| ENSG00000196220 | 4.75690578  | 4.777836593 | protein_coding   | 3  | 9022275   | 9404737   | SRGAP3    |
| ENSG00000196226 | 0.499066092 | 1.353254395 | protein_coding   | 6  | 26043455  | 26043885  | HIST1H2BB |
| ENSG00000196227 | 7.093410923 | 7.106738413 | protein_coding   | 20 | 58508819  | 58523735  | C20orf177 |
| ENSG00000196230 | 14.14368213 | 14.31404127 | protein_coding   | 6  | 30687978  | 30693203  | TUBB      |
| ENSG00000196233 | 7.940593421 | 7.946442679 | protein_coding   | 10 | 98592017  | 98740800  | LCOR      |
| ENSG00000196235 | 9.482161805 | 9.549221123 | protein_coding   | 19 | 39936186  | 39967306  | SUPT5H    |
| ENSG00000196236 | 8.835633972 | 8.846464976 | protein_coding   | 22 | 41253081  | 41368585  | XPNPEP3   |
| ENSG00000196247 | 8.375265417 | 7.472765069 | protein_coding   | 7  | 64126501  | 64171404  | ZNF107    |
| ENSG00000196260 | 0.499066092 | 0           | protein_coding   | 6  | 30899130  | 30899952  | SFTA2     |
| ENSG00000196262 | 11.93340152 | 11.79959747 | protein_coding   | 7  | 44836279  | 44864163  | PPIA      |
| ENSG00000196263 | 5.774228067 | 5.974624386 | protein_coding   | 19 | 57019212  | 57040270  | ZNF471    |
| ENSG00000196267 | 6.0776925   | 6.136428444 | protein_coding   | 19 | 52658125  | 52674896  | ZNF836    |
| ENSG00000196268 | 7.374222747 | 7.793067905 | protein_coding   | 19 | 21579931  | 21610375  | ZNF493    |
| ENSG00000196275 | 2.762599152 | 3.027231696 | protein_coding   | 7  | 74210483  | 74267847  | GTF2IRD2  |
| ENSG00000196284 | 6.112579918 | 5.938503778 | protein_coding   | 6  | 44777054  | 45345690  | SUPT3H    |
| ENSG00000196289 | 0.869158192 | 0.697730409 | pseudogene       | 1  | 242121039 | 242122364 | BECN1P1   |
| ENSG00000196290 | 8.267164507 | 8.432796436 | protein_coding   | 2  | 201754050 | 201768655 | NIF3L1    |
| ENSG00000196295 | 6.766474304 | 6.839280559 | processed_transc | 7  | 30555925  | 30604233  |           |
| ENSG00000196296 | 5.485736881 | 5.32851069  | protein_coding   | 16 | 28889726  | 28915830  | ATP2A1    |

|                 |             |             |                |    |           |           |           |
|-----------------|-------------|-------------|----------------|----|-----------|-----------|-----------|
| ENSG00000196305 | 12.56450073 | 12.59515222 | protein_coding | 9  | 94972489  | 95056038  | IARS      |
| ENSG00000196312 | 2.928422289 | 3.279072565 | protein_coding | 9  | 99711033  | 99775862  | HIATL2    |
| ENSG00000196313 | 9.171738888 | 8.114504097 | protein_coding | 7  | 72349936  | 72421979  | POM121    |
| ENSG00000196323 | 9.227510213 | 9.458394052 | protein_coding | 11 | 130096572 | 130184581 | ZBTB44    |
| ENSG00000196329 | 2.928422289 | 3.935919592 | protein_coding | 7  | 150419341 | 150447121 | GIMAP5    |
| ENSG00000196331 | 2.471521042 | 2.788380093 | protein_coding | 6  | 27861203  | 27861669  | HIST1H2BO |
| ENSG00000196335 | 3.335220907 | 2.420525079 | protein_coding | 7  | 23749786  | 23872132  | STK31     |
| ENSG00000196337 | 4.464551814 | 3.279072565 | protein_coding | 19 | 49557531  | 49562117  | CGB7      |
| ENSG00000196338 | 4.999881834 | 5.09905904  | protein_coding | X  | 70364681  | 70391051  | NLGN3     |
| ENSG00000196345 | 2.847891871 | 3.935919592 | protein_coding | 3  | 44596685  | 44635665  | ZNF167    |
| ENSG00000196352 | 8.440221571 | 8.793860943 | protein_coding | 1  | 207494853 | 207534311 | CD55      |
| ENSG00000196355 | 0.869158192 | 1.667587519 | protein_coding | 4  | 38628029  | 38666430  |           |
| ENSG00000196357 | 3.911897206 | 4.448594745 | protein_coding | 19 | 36673188  | 36737159  | ZNF565    |
| ENSG00000196358 | 3.652182994 | 3.232099092 | protein_coding | 9  | 135037334 | 135119921 | NTNG2     |
| ENSG00000196361 | 0.499066092 | 1.353254395 | protein_coding | 19 | 11562143  | 11591803  | ELAVL3    |
| ENSG00000196363 | 10.38499274 | 10.14745308 | protein_coding | 9  | 137001210 | 137025093 | WDR5      |
| ENSG00000196364 | 0           | 0.390640832 | protein_coding | 16 | 1310953   | 1313846   |           |
| ENSG00000196365 | 11.42860114 | 11.75888075 | protein_coding | 19 | 5691845   | 5720463   | LONP1     |
| ENSG00000196366 | 3.146112541 | 3.906303962 | protein_coding | 9  | 139377947 | 139380518 | C9orf163  |
| ENSG00000196367 | 10.75226989 | 10.14626591 | protein_coding | 7  | 98475556  | 98610866  | TRRAP     |
| ENSG00000196369 | 6.005279909 | 5.832272499 | pseudogene     | 1  | 143913615 | 144094424 | SRGAP2P2  |
| ENSG00000196371 | 6.710639711 | 6.668971382 | protein_coding | 11 | 94277017  | 94283063  | FUT4      |
| ENSG00000196372 | 9.373990307 | 8.962525691 | protein_coding | 10 | 5680830   | 5708768   | ASB13     |
| ENSG00000196374 | 0           | 1.353254395 | protein_coding | 6  | 27782822  | 27783267  | HIST1H2BM |
| ENSG00000196378 | 4.491309013 | 4.622587519 | protein_coding | 8  | 145997611 | 146012730 | ZNF34     |
| ENSG00000196381 | 4.19837882  | 4.810179682 | protein_coding | 19 | 38158650  | 38183216  | ZNF781    |
| ENSG00000196387 | 7.334137164 | 7.648510984 | protein_coding | 12 | 133656424 | 133684130 | ZNF140    |
| ENSG00000196388 | 4.842525946 | 5.611474642 | protein_coding | 17 | 4891426   | 4900905   | INCA1     |
| ENSG00000196390 | 0.869158192 | 0.697730409 | pseudogene     | 5  | 74225705  | 74226391  |           |
| ENSG00000196391 | 4.942865586 | 4.917990497 | protein_coding | 15 | 90895477  | 90909324  | ZNF774    |
| ENSG00000196396 | 10.2684903  | 9.770824962 | protein_coding | 20 | 49126891  | 49201299  | PTPN1     |
| ENSG00000196400 | 0.869158192 | 1.667587519 | protein_coding | 9  | 69252845  | 69254032  |           |
| ENSG00000196405 | 9.190229706 | 8.553535588 | protein_coding | 14 | 100437786 | 100610573 | EVL       |
| ENSG00000196407 | 4.568725997 | 3.714580548 | protein_coding | 1  | 151818220 | 151826173 | THEM5     |
| ENSG00000196409 | 3.393122761 | 3.232099092 | protein_coding | 9  | 40760700  | 40836415  | ZNF658    |
| ENSG00000196411 | 11.13846561 | 9.621627484 | protein_coding | 7  | 100400187 | 100425121 | EPHB4     |
| ENSG00000196415 | 0           | 0.390640832 | protein_coding | 19 | 840985    | 848180    | PRTN3     |
| ENSG00000196417 | 7.921045056 | 7.646273261 | protein_coding | 19 | 53893046  | 53930574  | ZNF765    |
| ENSG00000196418 | 5.869093502 | 6.002883551 | protein_coding | 1  | 247285277 | 247335310 | ZNF124    |
| ENSG00000196419 | 12.17032476 | 12.27851138 | protein_coding | 22 | 42017123  | 42060044  | XRCC6     |
| ENSG00000196420 | 1.16343121  | 1.353254395 | protein_coding | 1  | 153509623 | 153514241 | S100A5    |
| ENSG00000196421 | 2.671945279 | 3.679994897 | lincRNA        | 20 | 62665697  | 62671315  | LINC00176 |
| ENSG00000196422 | 9.264821181 | 8.52337065  | protein_coding | 9  | 138371648 | 138380739 | PPP1R26   |
| ENSG00000196427 | 0.499066092 | 0.390640832 | protein_coding | 1  | 108765087 | 108786703 | NBPF4     |
| ENSG00000196428 | 9.048782844 | 8.540340653 | protein_coding | 3  | 150126080 | 150177903 | TSC22D2   |
| ENSG00000196433 | 0           | 0.697730409 | protein_coding | X  | 1733894   | 1761974   | ASMT      |
| ENSG00000196436 | 0           | 0.390640832 | protein_coding | 16 | 74411156  | 74425978  | NPIPL2    |
| ENSG00000196437 | 6.386460534 | 6.889336956 | protein_coding | 19 | 37902062  | 37958339  | ZNF569    |
| ENSG00000196440 | 6.298293508 | 6.874119142 | protein_coding | X  | 100673275 | 100788446 | ARMCX4    |
| ENSG00000196449 | 7.575190993 | 7.340609974 | protein_coding | 1  | 38268616  | 38273857  | YRDC      |
| ENSG00000196453 | 8.426422697 | 8.275187599 | protein_coding | 7  | 149128454 | 149158214 | ZNF777    |
| ENSG00000196455 | 9.169669647 | 9.081580806 | protein_coding | 3  | 130397779 | 130465673 | PIK3R4    |
| ENSG00000196456 | 7.15746161  | 7.179727017 | protein_coding | 7  | 150065879 | 150109558 | ZNF775    |
| ENSG00000196458 | 8.061582684 | 8.313767852 | protein_coding | 12 | 133498047 | 133532892 | ZNF605    |
| ENSG00000196459 | 6.941611359 | 6.807590479 | protein_coding | X  | 13730363  | 13752754  | TRAPPC2   |
| ENSG00000196460 | 0.869158192 | 0.390640832 | protein_coding | 2  | 101966891 | 102091165 | RFX8      |
| ENSG00000196465 | 8.415986232 | 8.933456715 | protein_coding | 12 | 56546040  | 56551771  | MYL6B     |
| ENSG00000196466 | 5.869093502 | 6.316088276 | protein_coding | 19 | 12490003  | 12512088  | ZNF799    |
| ENSG00000196470 | 6.693459083 | 6.889336956 | protein_coding | 16 | 48390275  | 48482313  | SIAH1     |
| ENSG00000196476 | 7.654275977 | 8.129000175 | protein_coding | 20 | 251504    | 271390    | C20orf96  |
| ENSG00000196482 | 0           | 0.390640832 | protein_coding | 1  | 216676588 | 217311097 | ESRRG     |
| ENSG00000196497 | 4.999881834 | 5.306006045 | protein_coding | 14 | 24649425  | 24658170  | IPO4      |
| ENSG00000196498 | 11.52421735 | 11.09422652 | protein_coding | 12 | 124808961 | 125052135 | NCOR2     |

|                 |             |             |                  |    |           |           |             |
|-----------------|-------------|-------------|------------------|----|-----------|-----------|-------------|
| ENSG00000196502 | 0.869158192 | 0.697730409 | protein_coding   | 16 | 28616903  | 28634946  | SULT1A1     |
| ENSG00000196503 | 2.10647801  | 3.183544561 | protein_coding   | 4  | 57371375  | 57390058  | ARL9        |
| ENSG00000196504 | 10.55117621 | 10.49516031 | protein_coding   | 2  | 153508107 | 153574511 | PRPF40A     |
| ENSG00000196505 | 6.856698814 | 6.847095496 | protein_coding   | 1  | 118412037 | 118472253 | GDAP2       |
| ENSG00000196507 | 7.003331296 | 7.37615181  | protein_coding   | X  | 102862379 | 102884618 | TCEAL3      |
| ENSG00000196510 | 8.78921631  | 9.067434305 | protein_coding   | 12 | 110810705 | 110841535 | ANAPC7      |
| ENSG00000196511 | 6.882196036 | 7.04692429  | protein_coding   | 7  | 144149034 | 144533488 | TPK1        |
| ENSG00000196517 | 8.898207576 | 9.231660172 | protein_coding   | 1  | 44457172  | 44497139  | SLC6A9      |
| ENSG00000196526 | 10.5335842  | 10.24421147 | protein_coding   | 4  | 7760441   | 7941653   | AFAP1       |
| ENSG00000196531 | 11.8994666  | 12.24655409 | protein_coding   | 12 | 57106212  | 57125412  | NACA        |
| ENSG00000196532 | 2.238690726 | 2.334191469 | protein_coding   | 6  | 26045639  | 26046097  | HIST1H3C    |
| ENSG00000196533 | 0           | 0.390640832 | protein_coding   | 1  | 206238872 | 206288647 | C1orf186    |
| ENSG00000196535 | 9.852875742 | 9.005932523 | protein_coding   | 17 | 27400528  | 27507430  | MYO18A      |
| ENSG00000196542 | 1.16343121  | 0.390640832 | protein_coding   | 3  | 161062580 | 161090668 | SPTSSB      |
| ENSG00000196544 | 7.543580762 | 8.005247922 | protein_coding   | 17 | 8091652   | 8093564   | C17orf59    |
| ENSG00000196547 | 8.193715877 | 9.272857279 | protein_coding   | 15 | 91445448  | 91465814  | MAN2A2      |
| ENSG00000196549 | 1.407729925 | 1.16600992  | protein_coding   | 3  | 154741913 | 154901497 | MME         |
| ENSG00000196550 | 4.097495944 | 4.048652948 | protein_coding   | 1  | 206136916 | 206155151 | FAM72A      |
| ENSG00000196553 | 0.869158192 | 1.353254395 | processed_transc | 14 | 66953072  | 66965271  | LINC00238   |
| ENSG00000196557 | 6.92698535  | 7.002128877 | protein_coding   | 16 | 1203241   | 1271771   | CACNA1H     |
| ENSG00000196559 | 3.950976309 | 3.608232228 | protein_coding   | 11 | 36290834  | 36294971  | C11orf55    |
| ENSG00000196562 | 3.603959378 | 1.925536307 | protein_coding   | 20 | 46285092  | 46415360  | SULF2       |
| ENSG00000196566 | 0           | 0.697730409 | antisense        | 10 | 89369920  | 89419760  |             |
| ENSG00000196569 | 3.393122761 | 2.851901313 | protein_coding   | 6  | 129204286 | 129837714 | LAMA2       |
| ENSG00000196576 | 12.15719972 | 12.02311826 | protein_coding   | 22 | 50713408  | 50746056  | PLXNB2      |
| ENSG00000196584 | 8.625246244 | 8.540340653 | protein_coding   | 7  | 152341864 | 152373250 | XRCC2       |
| ENSG00000196586 | 7.784382559 | 5.404622322 | protein_coding   | 6  | 76458909  | 76629254  | MYO6        |
| ENSG00000196588 | 9.700687762 | 9.736525625 | protein_coding   | 22 | 40806285  | 41032706  | MKL1        |
| ENSG00000196591 | 10.28674387 | 10.4634184  | protein_coding   | 6  | 114254192 | 114332472 | HDAC2       |
| ENSG00000196593 | 8.156585168 | 7.255086103 | lincRNA          | 13 | 24513696  | 24520921  | ANKRD20A19P |
| ENSG00000196597 | 5.417620896 | 5.629711952 | protein_coding   | 9  | 99578754  | 99637905  | ZNF782      |
| ENSG00000196604 | 2.10647801  | 1.802319292 | protein_coding   | 2  | 130831108 | 130886795 | POTEF       |
| ENSG00000196605 | 5.018397273 | 5.283144778 | protein_coding   | 19 | 9868151   | 9879410   | ZNF846      |
| ENSG00000196611 | 4.942865586 | 4.990346085 | protein_coding   | 11 | 102660651 | 102668891 | MMP1        |
| ENSG00000196622 | 1.16343121  | 1.16600992  | protein_coding   | 22 | 20455682  | 20461786  | RIMBP3      |
| ENSG00000196628 | 0.499066092 | 2.144285137 | protein_coding   | 18 | 52889562  | 53332018  | TCF4        |
| ENSG00000196632 | 0.499066092 | 0.950786998 | protein_coding   | X  | 54219256  | 54385075  | WNK3        |
| ENSG00000196636 | 7.627388205 | 7.632773539 | protein_coding   | 7  | 96745902  | 96811075  | ACN9        |
| ENSG00000196639 | 7.808521034 | 7.329495501 | protein_coding   | 3  | 11178779  | 11305243  | HRH1        |
| ENSG00000196642 | 11.09442207 | 10.81477289 | protein_coding   | 9  | 139694818 | 139735639 | C9orf86     |
| ENSG00000196644 | 1.960915222 | 1.16600992  | protein_coding   | 1  | 145883868 | 145924373 | GPR89C      |
| ENSG00000196646 | 7.720795447 | 7.864110577 | protein_coding   | 19 | 12273879  | 12300064  | ZNF136      |
| ENSG00000196648 | 4.097495944 | 4.048652948 | protein_coding   | 15 | 83098710  | 83108085  |             |
| ENSG00000196652 | 8.261346552 | 7.966311947 | protein_coding   | 7  | 99101607  | 99132323  | ZKSCAN5     |
| ENSG00000196653 | 6.032862302 | 5.125003832 | protein_coding   | 3  | 44754135  | 44765323  | ZNF502      |
| ENSG00000196655 | 8.470794781 | 8.967911514 | protein_coding   | 11 | 118889142 | 118896164 | TRAPPC4     |
| ENSG00000196659 | 4.77879189  | 4.888000647 | protein_coding   | 2  | 178414890 | 178417742 | TTC30B      |
| ENSG00000196663 | 8.552470601 | 7.856387513 | protein_coding   | 14 | 102829300 | 102968818 | TECPR2      |
| ENSG00000196664 | 2.57521082  | 3.570966319 | protein_coding   | X  | 12885202  | 12908499  | TLR7        |
| ENSG00000196666 | 0.869158192 | 0.950786998 | protein_coding   | 11 | 47608198  | 47610746  | FAM180B     |
| ENSG00000196668 | 3.830412367 | 2.721932731 | processed_transc | 12 | 116971227 | 116974323 | LINC00173   |
| ENSG00000196670 | 7.08903805  | 7.359856617 | protein_coding   | 5  | 180274611 | 180288286 | ZFP62       |
| ENSG00000196674 | 1.16343121  | 1.16600992  | pseudogene       | 16 | 653555    | 653904    |             |
| ENSG00000196678 | 7.304268146 | 7.635032283 | protein_coding   | 16 | 20791515  | 20911671  | ERI2        |
| ENSG00000196683 | 10.19612778 | 10.41626325 | protein_coding   | 7  | 22852251  | 22862470  | TOMM7       |
| ENSG00000196684 | 6.592037289 | 5.361622823 | protein_coding   | 19 | 16244838  | 16269344  | HSH2D       |
| ENSG00000196689 | 7.876068031 | 8.49131535  | protein_coding   | 17 | 3468743   | 3500392   | TRPV1       |
| ENSG00000196690 | 0.869158192 | 0           | protein_coding   | 1  | 17196254  | 17198668  |             |
| ENSG00000196693 | 7.73205733  | 7.709798264 | protein_coding   | 10 | 43069633  | 43134018  | ZNF33B      |
| ENSG00000196696 | 4.352265886 | 4.761389014 | processed_transc | 16 | 70010200  | 70099851  | PDXDC2P     |
| ENSG00000196700 | 9.805686507 | 9.98296744  | protein_coding   | 20 | 62588055  | 62680113  | ZNF512B     |
| ENSG00000196704 | 9.27736711  | 9.636359306 | protein_coding   | 17 | 66244145  | 66253305  | AMZ2        |
| ENSG00000196705 | 7.572060955 | 7.408200217 | protein_coding   | 19 | 21324840  | 21368805  | ZNF431      |

|                 |             |             |                  |    |           |           |           |
|-----------------|-------------|-------------|------------------|----|-----------|-----------|-----------|
| ENSG00000196712 | 10.30476938 | 9.565299431 | protein_coding   | 17 | 29421945  | 29708905  | NF1       |
| ENSG00000196715 | 10.05248241 | 9.201496347 | protein_coding   | 7  | 65338254  | 65424530  | VKORC1L1  |
| ENSG00000196724 | 6.548110424 | 7.03670965  | protein_coding   | 19 | 58433252  | 58446755  | ZNF418    |
| ENSG00000196730 | 7.454602977 | 7.373448694 | protein_coding   | 9  | 90112143  | 90323548  | DAPK1     |
| ENSG00000196737 | 3.146112541 | 3.493416095 | pseudogene       | 17 | 666805    | 668559    |           |
| ENSG00000196739 | 9.477987143 | 9.888149185 | protein_coding   | 9  | 116917840 | 117074791 | COL27A1   |
| ENSG00000196741 | 3.502389126 | 4.622587519 | protein_coding   | X  | 47342970  | 47344207  | CXorf24   |
| ENSG00000196743 | 8.819887015 | 8.263555427 | protein_coding   | 5  | 150591711 | 150650001 | GM2A      |
| ENSG00000196747 | 0.869158192 | 2.721932731 | protein_coding   | 6  | 27775899  | 27776429  | HIST1H2AI |
| ENSG00000196748 | 0.869158192 | 1.518964905 | protein_coding   | 6  | 35744371  | 35747329  | C6orf126  |
| ENSG00000196754 | 8.966547133 | 5.446377228 | protein_coding   | 1  | 153533584 | 153540366 | S100A2    |
| ENSG00000196756 | 9.889169155 | 10.03606464 | processed_transc | 20 | 37049235  | 37063996  |           |
| ENSG00000196757 | 8.508940744 | 8.560682282 | protein_coding   | 19 | 12035900  | 12061588  | ZNF700    |
| ENSG00000196776 | 10.4154368  | 10.17604383 | protein_coding   | 3  | 107762145 | 107809872 | CD47      |
| ENSG00000196781 | 9.986421812 | 9.821783646 | protein_coding   | 9  | 84198598  | 84304220  | TLE1      |
| ENSG00000196782 | 3.502389126 | 4.17820932  | protein_coding   | 4  | 140640419 | 141075338 | MAML3     |
| ENSG00000196787 | 5.4452544   | 5.506827567 | protein_coding   | 6  | 27100832  | 27103070  | HIST1H2AG |
| ENSG00000196792 | 8.464056506 | 8.360927302 | protein_coding   | 14 | 31363005  | 31495607  | STRN3     |
| ENSG00000196793 | 7.356139979 | 7.462626902 | protein_coding   | 10 | 44051792  | 44070066  | ZNF239    |
| ENSG00000196810 | 5.672682881 | 5.96747225  | protein_coding   | 4  | 1243088   | 1245224   | C4orf42   |
| ENSG00000196811 | 3.211941663 | 2.652276565 | protein_coding   | 2  | 233404437 | 233412546 | CHRNA1    |
| ENSG00000196812 | 4.464551814 | 4.810179682 | protein_coding   | 6  | 28092338  | 28097860  | ZSCAN16   |
| ENSG00000196814 | 6.469548347 | 6.885547525 | protein_coding   | 9  | 129089128 | 129269320 | FAM125B   |
| ENSG00000196821 | 10.53479049 | 10.33870236 | protein_coding   | 6  | 34555065  | 34664636  | C6orf106  |
| ENSG00000196834 | 0.499066092 | 0.390640832 | protein_coding   | 2  | 131217028 | 131267239 | POTE1     |
| ENSG00000196839 | 7.950269163 | 7.978815021 | protein_coding   | 20 | 43248163  | 43280874  | ADA       |
| ENSG00000196843 | 7.67776266  | 7.799123587 | protein_coding   | 2  | 97202480  | 97218375  | ARID5A    |
| ENSG00000196844 | 2.35979773  | 3.32456471  | protein_coding   | 11 | 125646008 | 125648714 | PATE2     |
| ENSG00000196850 | 8.768856552 | 8.395978102 | protein_coding   | 12 | 110969120 | 111021125 | PPTC7     |
| ENSG00000196860 | 1.16343121  | 1.16600992  | protein_coding   | 14 | 58862634  | 58875419  | TOMM20L   |
| ENSG00000196865 | 8.183497283 | 8.46616347  | protein_coding   | 10 | 115614420 | 115676953 | NHLRC2    |
| ENSG00000196867 | 7.2307479   | 7.436965343 | protein_coding   | 19 | 57050317  | 57068169  | ZFP28     |
| ENSG00000196872 | 2.35979773  | 1.802319292 | protein_coding   | 2  | 99410309  | 99552722  | C2orf55   |
| ENSG00000196873 | 3.274897671 | 3.232099092 | protein_coding   | 9  | 70849767  | 70914931  | CBWD3     |
| ENSG00000196876 | 1.16343121  | 0.950786998 | protein_coding   | 12 | 51984050  | 52202297  | SCN8A     |
| ENSG00000196878 | 12.46708279 | 12.24821499 | protein_coding   | 1  | 209788220 | 209825811 | LAMB3     |
| ENSG00000196890 | 1.16343121  | 0.697730409 | protein_coding   | 1  | 228645808 | 228646259 | HIST3H2BB |
| ENSG00000196893 | 0.499066092 | 0           | antisense        | 17 | 18854938  | 18857462  |           |
| ENSG00000196911 | 5.175139844 | 5.516660875 | protein_coding   | 6  | 117002350 | 117063029 | KPNA5     |
| ENSG00000196912 | 4.842525946 | 4.15321211  | pseudogene       | 2  | 98108978  | 98206428  | ANKRD36B  |
| ENSG00000196914 | 10.73593044 | 10.77025591 | protein_coding   | 11 | 120207787 | 120360645 | ARHGEF12  |
| ENSG00000196917 | 6.509364082 | 1.925536307 | protein_coding   | 12 | 123104824 | 123215390 | HCAR1     |
| ENSG00000196922 | 6.902274257 | 7.402908012 | protein_coding   | 8  | 146198975 | 146228281 | ZNF252    |
| ENSG00000196923 | 10.67231523 | 11.35845013 | protein_coding   | 5  | 176910395 | 176924607 | PDLIM7    |
| ENSG00000196924 | 15.74364514 | 15.74549093 | protein_coding   | X  | 153576892 | 153603006 | FLNA      |
| ENSG00000196933 | 0           | 0.697730409 | pseudogene       | X  | 71264395  | 71264742  | RPS26P11  |
| ENSG00000196935 | 9.365879787 | 8.782698567 | protein_coding   | 12 | 64238073  | 64541613  | SRGAP1    |
| ENSG00000196937 | 9.493786999 | 9.035301979 | protein_coding   | 7  | 120988905 | 121036418 | FAM3C     |
| ENSG00000196943 | 9.159278686 | 9.113519788 | protein_coding   | 14 | 24769068  | 24778330  | C14orf21  |
| ENSG00000196950 | 10.78980292 | 9.697613846 | protein_coding   | 2  | 196440701 | 196602426 | SLC39A10  |
| ENSG00000196951 | 2.10647801  | 2.242360793 | processed_transc | 4  | 141204880 | 141294514 |           |
| ENSG00000196954 | 10.01724335 | 10.36513542 | protein_coding   | 11 | 104813593 | 104840163 | CASP4     |
| ENSG00000196960 | 2.671945279 | 4.604259349 | protein_coding   | 10 | 31650356  | 31652937  |           |
| ENSG00000196961 | 10.70661584 | 10.54885709 | protein_coding   | 19 | 50270180  | 50310369  | AP2A1     |
| ENSG00000196963 | 7.832262274 | 8.157562549 | protein_coding   | 5  | 140560980 | 140565793 | PCDHB16   |
| ENSG00000196966 | 2.762599152 | 3.368666104 | protein_coding   | 6  | 26225383  | 26225844  | HIST1H3E  |
| ENSG00000196967 | 5.525114348 | 5.901455548 | protein_coding   | 19 | 37641004  | 37663615  | ZNF585A   |
| ENSG00000196968 | 7.671926738 | 7.84081624  | protein_coding   | 10 | 75532049  | 75538821  | FUT11     |
| ENSG00000196972 | 0.499066092 | 0.697730409 | processed_transc | X  | 134229015 | 134232654 | LINC00087 |
| ENSG00000196975 | 8.510576602 | 8.923327429 | protein_coding   | 2  | 69947923  | 70053596  | ANXA4     |
| ENSG00000196976 | 8.703135933 | 9.565891497 | protein_coding   | X  | 153706028 | 153707596 | LAGE3     |
| ENSG00000196979 | 0.499066092 | 0.950786998 | protein_coding   | 9  | 132902889 | 132906498 |           |
| ENSG00000196981 | 5.958104008 | 6.174194902 | protein_coding   | 3  | 122130715 | 122134882 | WDR5B     |

|                 |             |             |                  |   |    |           |                    |
|-----------------|-------------|-------------|------------------|---|----|-----------|--------------------|
| ENSG00000196987 | 0           | 2.721932731 | protein_coding   | X |    | 153146127 | 153154444          |
| ENSG00000196993 | 0           | 0.697730409 | protein_coding   |   | 16 | 28763108  | 28784128           |
| ENSG00000196998 | 7.834876234 | 9.127223641 | protein_coding   | X |    | 48929385  | 48958108 WDR45     |
| ENSG00000197006 | 9.328343713 | 9.542618981 | protein_coding   |   | 16 | 21608539  | 21668794 METTL9    |
| ENSG00000197008 | 6.766474304 | 6.117167886 | protein_coding   |   | 7  | 64254766  | 64294054 ZNF138    |
| ENSG00000197013 | 6.610461229 | 6.470782801 | protein_coding   |   | 19 | 21688437  | 21721079 ZNF429    |
| ENSG00000197016 | 7.308035767 | 7.686030656 | protein_coding   |   | 19 | 57078890  | 57094261 ZNF470    |
| ENSG00000197019 | 5.83815965  | 6.084484284 | protein_coding   |   | 19 | 40927499  | 40931932 SERTAD1   |
| ENSG00000197020 | 7.609180529 | 7.675096386 | protein_coding   |   | 19 | 21905568  | 21950330 ZNF100    |
| ENSG00000197021 | 7.680671792 | 7.497803111 | protein_coding   | X |    | 149097745 | 149107029 CXorf40B |
| ENSG00000197024 | 7.811178326 | 7.51752531  | protein_coding   |   | 7  | 148823508 | 148880116 ZNF398   |
| ENSG00000197037 | 7.803191723 | 7.560938532 | protein_coding   |   | 7  | 99214569  | 99230030 ZNF498    |
| ENSG00000197043 | 9.546566899 | 8.89250574  | protein_coding   |   | 5  | 150480273 | 150537443 ANXA6    |
| ENSG00000197044 | 5.741167503 | 6.795524906 | protein_coding   |   | 19 | 11877815  | 11894893 ZNF441    |
| ENSG00000197045 | 9.53214319  | 10.04543499 | protein_coding   |   | 14 | 54941202  | 54955914 GMFB      |
| ENSG00000197046 | 1.616589159 | 2.334191469 | protein_coding   |   | 18 | 43405545  | 43422521 SIGLEC15  |
| ENSG00000197049 | 1.16343121  | 1.353254395 | protein_coding   |   | 1  | 721320    | 722513             |
| ENSG00000197050 | 6.283060568 | 6.365895578 | protein_coding   |   | 19 | 37569337  | 37621212 ZNF420    |
| ENSG00000197054 | 4.381167248 | 4.976162367 | protein_coding   |   | 19 | 12035890  | 12090390 ZNF763    |
| ENSG00000197056 | 7.530740159 | 7.659647832 | protein_coding   |   | 1  | 35525387  | 35581460 ZMYM1     |
| ENSG00000197061 | 0.499066092 | 1.667587519 | protein_coding   |   | 6  | 26104104  | 26104518 HIST1H4C  |
| ENSG00000197062 | 5.707331524 | 6.619638408 | pseudogene       |   | 6  | 28234788  | 28245974           |
| ENSG00000197063 | 9.304024157 | 9.187714109 | protein_coding   |   | 17 | 79876149  | 79885588 MAFG      |
| ENSG00000197067 | 0.499066092 | 1.518964905 | pseudogene       |   | 1  | 248246941 | 248247898          |
| ENSG00000197070 | 9.14670993  | 8.293892101 | protein_coding   |   | 9  | 140500106 | 140509812 ARRDC1   |
| ENSG00000197071 | 0.499066092 | 0           | pseudogene       |   | 5  | 87514708  | 87515080           |
| ENSG00000197077 | 10.21079294 | 9.914421539 | protein_coding   |   | 22 | 25421600  | 25593415 KIAA1671  |
| ENSG00000197081 | 12.02438058 | 12.05414925 | protein_coding   |   | 6  | 160390131 | 160534539 IGF2R    |
| ENSG00000197083 | 0.499066092 | 0.950786998 | pseudogene       |   | 5  | 150310207 | 150325851 ZNF300P1 |
| ENSG00000197085 | 1.16343121  | 0.390640832 | processed_transc |   | 7  | 34386124  | 34911194           |
| ENSG00000197093 | 4.77879189  | 3.748356452 | protein_coding   |   | 7  | 99756867  | 99766373 GAL3ST4   |
| ENSG00000197102 | 13.36309292 | 12.53315011 | protein_coding   |   | 14 | 102430865 | 102517129 DYNC1H1  |
| ENSG00000197106 | 0.499066092 | 0.697730409 | protein_coding   |   | 1  | 110693108 | 110744824 SLC6A17  |
| ENSG00000197111 | 11.02715748 | 10.77564033 | protein_coding   |   | 12 | 53835525  | 53874946 PCBP2     |
| ENSG00000197114 | 8.900704842 | 8.53672099  | protein_coding   |   | 20 | 62338794  | 62370456 ZGPAT     |
| ENSG00000197119 | 7.491518048 | 8.237034976 | protein_coding   |   | 14 | 100757448 | 100772884 SLC25A29 |
| ENSG00000197121 | 8.377059993 | 8.273738696 | protein_coding   |   | 2  | 197697728 | 197792520 PGAP1    |
| ENSG00000197122 | 9.874634141 | 10.55811145 | protein_coding   |   | 20 | 35973088  | 36034453 SRC       |
| ENSG00000197123 | 0.499066092 | 0.390640832 | protein_coding   |   | 7  | 63688852  | 63727309 ZNF679    |
| ENSG00000197124 | 6.616550626 | 7.022976646 | protein_coding   |   | 19 | 20115227  | 20150277 ZNF682    |
| ENSG00000197128 | 7.210761201 | 7.157901395 | protein_coding   |   | 19 | 57980954  | 57988938 ZNF772    |
| ENSG00000197134 | 6.095241663 | 5.960284481 | protein_coding   |   | 19 | 22235266  | 22273901 ZNF257    |
| ENSG00000197136 | 10.9164443  | 10.71847539 | protein_coding   |   | 11 | 65383244  | 65404910 PCNXL3    |
| ENSG00000197140 | 1.616589159 | 2.144285137 | protein_coding   |   | 8  | 38964509  | 39142435 ADAM32    |
| ENSG00000197142 | 9.555310919 | 8.887777807 | protein_coding   |   | 10 | 114133776 | 114188138 ACSL5    |
| ENSG00000197146 | 4.322773689 | 3.906303962 | pseudogene       |   | 6  | 167357853 | 167360151          |
| ENSG00000197147 | 6.554468172 | 6.064512706 | protein_coding   |   | 1  | 89990395  | 90063423 LRRC8B    |
| ENSG00000197149 | 2.762599152 | 2.652276565 | pseudogene       |   | 11 | 17249817  | 17250698           |
| ENSG00000197150 | 9.754142144 | 9.631842439 | protein_coding   |   | 7  | 150725510 | 150744869 ABCB8    |
| ENSG00000197153 | 0.869158192 | 1.353254395 | protein_coding   |   | 6  | 27858093  | 27860884 HIST1H3J  |
| ENSG00000197157 | 12.14263609 | 11.6521071  | protein_coding   |   | 7  | 127292234 | 127732661 SND1     |
| ENSG00000197161 | 0.499066092 | 0.390640832 | pseudogene       |   | 11 | 48366900  | 48373999           |
| ENSG00000197162 | 5.763291843 | 5.683080141 | protein_coding   |   | 16 | 30585061  | 30597092 ZNF785    |
| ENSG00000197165 | 1.799000381 | 1.353254395 | protein_coding   |   | 16 | 28603264  | 28608430 SULT1A2   |
| ENSG00000197168 | 0.869158192 | 0.390640832 | protein_coding   |   | 13 | 52611093  | 52703214 NEK5      |
| ENSG00000197170 | 9.791627126 | 9.935650135 | protein_coding   |   | 17 | 65334032  | 65362743 PSMD12    |
| ENSG00000197180 | 2.238690726 | 2.420525079 | pseudogene       | X |    | 153656537 | 153656795          |
| ENSG00000197181 | 1.799000381 | 1.802319292 | protein_coding   |   | 8  | 22132810  | 22215076 PIWIL2    |
| ENSG00000197182 | 6.014532757 | 6.35497494  | protein_coding   |   | 22 | 46449749  | 46509808           |
| ENSG00000197183 | 7.603059879 | 6.510691757 | protein_coding   |   | 20 | 31030862  | 31172876 C20orf112 |
| ENSG00000197191 | 4.19837882  | 3.64455972  | protein_coding   |   | 9  | 140119087 | 140120763 C9orf169 |
| ENSG00000197208 | 6.975172889 | 7.65742733  | protein_coding   |   | 5  | 131630136 | 131679899 SLC22A4  |
| ENSG00000197210 | 0           | 1.16600992  | processed_transc |   | 22 | 21468896  | 21478740           |

|                 |             |             |                 |    |           |           |           |
|-----------------|-------------|-------------|-----------------|----|-----------|-----------|-----------|
| ENSG00000197213 | 0.499066092 | 2.039052734 | protein_coding  | 19 | 56701058  | 56704421  | ZSCAN5B   |
| ENSG00000197217 | 8.78516728  | 8.954409067 | protein_coding  | 8  | 23243296  | 23315208  | ENTPD4    |
| ENSG00000197223 | 6.138202758 | 6.419292172 | protein_coding  | 2  | 68268262  | 68338080  | C1D       |
| ENSG00000197226 | 10.51496026 | 10.58289346 | protein_coding  | 5  | 179289066 | 179334859 | TBC1D9B   |
| ENSG00000197238 | 2.10647801  | 2.652276565 | protein_coding  | 6  | 27791884  | 27792257  | HIST1H4J  |
| ENSG00000197245 | 0.869158192 | 1.353254395 | protein_coding  | 1  | 26485511  | 26489119  | FAM110D   |
| ENSG00000197249 | 10.98718    | 7.780879746 | protein_coding  | 14 | 94843084  | 94857030  | SERPINA1  |
| ENSG00000197251 | 0.499066092 | 0           | antisense       | 6  | 33553883  | 33561115  | LINC00336 |
| ENSG00000197253 | 2.928422289 | 3.906303962 | polymorphic_pse | 16 | 1277272   | 1280214   | TPSB2     |
| ENSG00000197256 | 10.30382626 | 10.47291982 | protein_coding  | 19 | 11274944  | 11308243  | KANK2     |
| ENSG00000197258 | 1.407729925 | 1.925536307 | pseudogene      | 7  | 104308196 | 104310023 | EIF4BP6   |
| ENSG00000197261 | 6.283060568 | 5.32851069  | protein_coding  | 6  | 49518113  | 49529620  | C6orf141  |
| ENSG00000197265 | 8.66103884  | 8.529454305 | protein_coding  | 8  | 30435835  | 30515768  | GTF2E2    |
| ENSG00000197275 | 7.062518763 | 7.381542895 | protein_coding  | 8  | 95384188  | 95487337  | RAD54B    |
| ENSG00000197279 | 5.929039784 | 4.932754837 | protein_coding  | 6  | 28048753  | 28057341  | ZNF165    |
| ENSG00000197283 | 8.074911866 | 8.487570409 | protein_coding  | 6  | 33387847  | 33421466  | SYNGAP1   |
| ENSG00000197284 | 0           | 0.390640832 | pseudogene      | 5  | 70070478  | 70074135  |           |
| ENSG00000197291 | 0           | 0.697730409 | protein_coding  | 17 | 40905951  | 40913275  |           |
| ENSG00000197296 | 7.778963161 | 7.960920138 | protein_coding  | 20 | 42931478  | 42939809  | FITM2     |
| ENSG00000197299 | 7.63640659  | 7.819127564 | protein_coding  | 15 | 91260558  | 91358859  | BLM       |
| ENSG00000197301 | 4.409500985 | 3.532712221 | protein_coding  | 12 | 66245120  | 66275947  |           |
| ENSG00000197302 | 7.097770581 | 7.167295693 | protein_coding  | 16 | 31724550  | 31806190  | ZNF720    |
| ENSG00000197312 | 8.591637531 | 8.435390709 | protein_coding  | 1  | 15943995  | 15995539  | DDI2      |
| ENSG00000197321 | 9.801015254 | 10.5228685  | protein_coding  | 10 | 29746267  | 30025710  | SVIL      |
| ENSG00000197323 | 9.176899044 | 9.131229537 | protein_coding  | 1  | 114935399 | 115053781 | TRIM33    |
| ENSG00000197324 | 11.42426834 | 11.69333284 | protein_coding  | 14 | 23340822  | 23350789  | LRP10     |
| ENSG00000197329 | 7.071412799 | 7.312661576 | protein_coding  | 2  | 64319786  | 64371588  | PELI1     |
| ENSG00000197332 | 6.640654398 | 7.148445524 | pseudogene      | 19 | 11750591  | 11797382  | ZNF833P   |
| ENSG00000197343 | 9.371291863 | 8.644911378 | protein_coding  | 7  | 99156029  | 99205433  | ZNF655    |
| ENSG00000197345 | 8.919297816 | 9.422885181 | protein_coding  | 11 | 68658744  | 68671303  | MRPL21    |
| ENSG00000197355 | 7.90122817  | 8.667154767 | protein_coding  | 9  | 139971953 | 139978991 | UAP1L1    |
| ENSG00000197358 | 5.91922012  | 7.439552137 | pseudogene      | 14 | 28733596  | 28735180  | BNIP3P1   |
| ENSG00000197361 | 1.407729925 | 1.16600992  | protein_coding  | 15 | 63889552  | 63894627  | FBXL22    |
| ENSG00000197362 | 7.304268146 | 6.885547525 | protein_coding  | 7  | 148766735 | 148787874 | ZNF786    |
| ENSG00000197363 | 5.417620896 | 5.66550919  | protein_coding  | 8  | 146024261 | 146036554 | ZNF517    |
| ENSG00000197372 | 7.935731106 | 7.621426466 | protein_coding  | 19 | 23835708  | 23870017  | ZNF675    |
| ENSG00000197375 | 7.720795447 | 7.621426466 | protein_coding  | 5  | 131705444 | 131731306 | SLC22A5   |
| ENSG00000197380 | 1.616589159 | 1.925536307 | protein_coding  | 19 | 47150869  | 47164395  | DACT3     |
| ENSG00000197381 | 8.276809264 | 7.811159227 | protein_coding  | 21 | 46493768  | 46646478  | ADARB1    |
| ENSG00000197385 | 4.19837882  | 4.075511708 | protein_coding  | 3  | 32023263  | 32033120  | ZNF860    |
| ENSG00000197386 | 10.63755355 | 10.55095198 | protein_coding  | 4  | 3076408   | 3245676   | HTT       |
| ENSG00000197405 | 2.928422289 | 2.501982735 | protein_coding  | 19 | 47813104  | 47825327  | C5AR1     |
| ENSG00000197406 | 0.869158192 | 0           | protein_coding  | 14 | 102027688 | 102029789 |           |
| ENSG00000197408 | 0           | 0.390640832 | protein_coding  | 19 | 41497204  | 41524301  | CYP2B6    |
| ENSG00000197409 | 3.335220907 | 3.133298822 | protein_coding  | 6  | 26197068  | 26199521  | HIST1H3D  |
| ENSG00000197410 | 0           | 1.802319292 | protein_coding  | 4  | 155155527 | 155412930 | DCHS2     |
| ENSG00000197415 | 1.407729925 | 1.802319292 | protein_coding  | 3  | 156977531 | 157251408 | VEPH1     |
| ENSG00000197417 | 8.787867896 | 8.871585941 | protein_coding  | 17 | 3511893   | 3539616   | SHPK      |
| ENSG00000197429 | 6.646617938 | 6.568558581 | protein_coding  | 1  | 46159996  | 46216322  | IPP       |
| ENSG00000197430 | 0.499066092 | 0           | protein_coding  | 10 | 98102973  | 98119092  | OPALIN    |
| ENSG00000197442 | 7.976547636 | 7.589171149 | protein_coding  | 6  | 136878185 | 137113656 | MAP3K5    |
| ENSG00000197444 | 2.10647801  | 0           | protein_coding  | 10 | 50942689  | 50970425  | OGDHL     |
| ENSG00000197446 | 1.616589159 | 0           | protein_coding  | 19 | 41620337  | 41634271  | CYP2F1    |
| ENSG00000197448 | 9.366783211 | 9.213637661 | protein_coding  | 7  | 142941186 | 142967947 | GSTK1     |
| ENSG00000197451 | 10.79316709 | 10.80125976 | protein_coding  | 5  | 177631508 | 177638164 | HNRNPAB   |
| ENSG00000197457 | 10.52349233 | 9.074940905 | protein_coding  | 20 | 62271061  | 62284780  | STMN3     |
| ENSG00000197459 | 4.322773689 | 4.761389014 | protein_coding  | 6  | 26251879  | 26252303  | HIST1H2BH |
| ENSG00000197461 | 7.959880444 | 7.664078611 | protein_coding  | 7  | 536895    | 559933    | PDGFA     |
| ENSG00000197462 | 0           | 0.390640832 | lincRNA         | 7  | 125557925 | 125573886 |           |
| ENSG00000197467 | 7.64536895  | 7.652976045 | protein_coding  | 10 | 71561644  | 71724031  | COL13A1   |
| ENSG00000197471 | 0           | 0.390640832 | protein_coding  | 16 | 29674300  | 29682187  | SPN       |
| ENSG00000197472 | 4.593635215 | 4.710890357 | protein_coding  | 1  | 247108849 | 247171395 | ZNF695    |
| ENSG00000197479 | 4.491309013 | 3.133298822 | protein_coding  | 5  | 140579183 | 140582618 | PCDH811   |

|                 |             |             |                  |    |           |           |           |
|-----------------|-------------|-------------|------------------|----|-----------|-----------|-----------|
| ENSG00000197483 | 8.324088959 | 7.563312496 | protein_coding   | 19 | 55987699  | 55995854  | ZNF628    |
| ENSG00000197497 | 6.086493765 | 6.097646709 | protein_coding   | 19 | 53666552  | 53696619  | ZNF665    |
| ENSG00000197498 | 7.990682129 | 8.001751392 | protein_coding   | 6  | 111303218 | 111347303 | RPF2      |
| ENSG00000197506 | 4.842525946 | 6.174194902 | protein_coding   | 9  | 86890372  | 86955672  | SLC28A3   |
| ENSG00000197511 | 2.471521042 | 2.501982735 | protein_coding   | 1  | 16862255  | 16864669  |           |
| ENSG00000197520 | 0.499066092 | 1.16600992  | protein_coding   | 1  | 222910549 | 222924147 | FAM177B   |
| ENSG00000197530 | 8.103376106 | 8.825850709 | protein_coding   | 1  | 1550795   | 1565990   | MIB2      |
| ENSG00000197535 | 8.836938493 | 9.050611798 | protein_coding   | 15 | 52599480  | 52821247  | MYO5A     |
| ENSG00000197536 | 4.800350936 | 5.564846512 | protein_coding   | 5  | 131746328 | 131811736 | C5orf56   |
| ENSG00000197540 | 1.407729925 | 2.501982735 | protein_coding   | 19 | 544027    | 549919    | GZMM      |
| ENSG00000197548 | 9.330197577 | 8.961626095 | protein_coding   | 3  | 11313995  | 11599139  | ATG7      |
| ENSG00000197550 | 1.616589159 | 1.16600992  | pseudogene       | 9  | 69830288  | 69848759  |           |
| ENSG00000197555 | 10.1438565  | 10.26987495 | protein_coding   | 14 | 71787166  | 72207946  | SIPA1L1   |
| ENSG00000197557 | 5.550781289 | 5.57429348  | protein_coding   | 2  | 178479026 | 178483694 | TTC30A    |
| ENSG00000197558 | 7.08903805  | 6.310446475 | processed_transc | 7  | 149473131 | 149531068 | SSPO      |
| ENSG00000197561 | 0.869158192 | 0.950786998 | protein_coding   | 19 | 852291    | 856242    | ELANE     |
| ENSG00000197562 | 8.311006074 | 8.208501977 | protein_coding   | 16 | 639357    | 679272    | RAB40C    |
| ENSG00000197563 | 8.048129203 | 8.382597612 | protein_coding   | 18 | 59711460  | 59854289  | PIGN      |
| ENSG00000197565 | 7.246540262 | 6.587342979 | protein_coding   | X  | 107386780 | 107682727 | COL4A6    |
| ENSG00000197566 | 5.431503808 | 6.3217081   | protein_coding   | 17 | 16524051  | 16557158  | ZNF624    |
| ENSG00000197568 | 6.050961887 | 5.767861411 | protein_coding   | 1  | 70820488  | 70851022  | HHLA3     |
| ENSG00000197575 | 0.499066092 | 1.16600992  | pseudogene       | 5  | 116051929 | 116052387 | RPS17P2   |
| ENSG00000197576 | 0.499066092 | 0           | protein_coding   | 7  | 27168126  | 27170418  | HOXA4     |
| ENSG00000197579 | 7.933293789 | 8.098224647 | protein_coding   | 9  | 32540542  | 32552551  | TOPORS    |
| ENSG00000197580 | 2.762599152 | 2.851901313 | protein_coding   | 11 | 112046190 | 112095422 | BCO2      |
| ENSG00000197582 | 1.960915222 | 2.039052734 | pseudogene       | X  | 13396854  | 13397459  | GPX1P1    |
| ENSG00000197586 | 10.42977299 | 10.62725021 | protein_coding   | 20 | 25176329  | 25207365  | ENTPD6    |
| ENSG00000197587 | 4.734682531 | 3.411459265 | protein_coding   | 1  | 46972668  | 46979898  | DMBX1     |
| ENSG00000197594 | 5.175139844 | 6.839280559 | protein_coding   | 6  | 132129156 | 132216295 | ENMP1     |
| ENSG00000197599 | 5.191549282 | 5.41517489  | protein_coding   | 16 | 1484384   | 1494557   | CCDC154   |
| ENSG00000197601 | 10.27042264 | 10.55721845 | protein_coding   | 11 | 13690217  | 13753893  | FAR1      |
| ENSG00000197603 | 8.057112115 | 8.567793748 | protein_coding   | 5  | 37106330  | 37249530  | C5orf42   |
| ENSG00000197604 | 2.57521082  | 2.039052734 | protein_coding   | 10 | 72194585  | 72196314  |           |
| ENSG00000197608 | 9.934355333 | 10.47984797 | protein_coding   | 19 | 52567719  | 52599018  | ZNF841    |
| ENSG00000197614 | 0           | 0.390640832 | protein_coding   | 12 | 8789942   | 8815484   | MFAP5     |
| ENSG00000197617 | 0.499066092 | 0.390640832 | pseudogene       | 1  | 247419374 | 247420447 | VN1R5     |
| ENSG00000197619 | 7.334137164 | 7.65742733  | protein_coding   | 19 | 52494588  | 52511483  | ZNF615    |
| ENSG00000197620 | 7.003331296 | 6.664555628 | protein_coding   | X  | 148621900 | 148632055 | CXorf40A  |
| ENSG00000197622 | 10.15069164 | 10.65673    | protein_coding   | 1  | 151023447 | 151032249 | CDC42SE1  |
| ENSG00000197632 | 8.853790788 | 4.274079748 | protein_coding   | 18 | 61538926  | 61571124  | SERPINB2  |
| ENSG00000197635 | 8.092494681 | 6.110690132 | protein_coding   | 2  | 162848751 | 162931052 | DPP4      |
| ENSG00000197641 | 0.499066092 | 0.697730409 | protein_coding   | 18 | 61254223  | 61271873  | SERPINB13 |
| ENSG00000197646 | 5.458875168 | 6.515603638 | protein_coding   | 9  | 5510545   | 5571282   | PDCD1LG2  |
| ENSG00000197647 | 5.899377978 | 6.117167886 | protein_coding   | 19 | 12125547  | 12146556  | ZNF433    |
| ENSG00000197653 | 2.847891871 | 3.64455972  | protein_coding   | 12 | 124247042 | 124420753 | DNAH10    |
| ENSG00000197670 | 3.698846687 | 3.87606762  | processed_transc | 20 | 52169309  | 52191847  |           |
| ENSG00000197681 | 0           | 0.390640832 | protein_coding   | 17 | 36337711  | 36358166  | TBC1D3    |
| ENSG00000197689 | 0.499066092 | 0.950786998 | protein_coding   | 17 | 28886584  | 28890507  | TBC1D29   |
| ENSG00000197694 | 11.98373622 | 12.03695669 | protein_coding   | 9  | 131314866 | 131395941 | SPTAN1    |
| ENSG00000197696 | 7.409722215 | 7.724721747 | protein_coding   | 15 | 85198360  | 85201794  | NMB       |
| ENSG00000197697 | 0.869158192 | 1.802319292 | protein_coding   | 6  | 26183958  | 26184454  | HIST1H2BE |
| ENSG00000197701 | 3.077135474 | 3.748356452 | protein_coding   | 4  | 53179     | 88099     | ZNF595    |
| ENSG00000197702 | 9.174837196 | 9.665379195 | protein_coding   | 11 | 12398732  | 12552348  | PARVA     |
| ENSG00000197712 | 9.217529022 | 9.115138778 | protein_coding   | 4  | 38869298  | 38947360  | FAM114A1  |
| ENSG00000197713 | 8.410739551 | 8.162268448 | protein_coding   | 2  | 210867289 | 210886300 | RPE       |
| ENSG00000197714 | 6.610461229 | 6.505763096 | protein_coding   | 19 | 57791419  | 57805436  | ZNF460    |
| ENSG00000197721 | 0.499066092 | 0           | protein_coding   | 1  | 207818458 | 207911761 | CR1L      |
| ENSG00000197723 | 0.499066092 | 1.16600992  | protein_coding   | 17 | 40274756  | 40275371  | HSPB9     |
| ENSG00000197724 | 8.878072281 | 8.793860943 | protein_coding   | 9  | 96338689  | 96441869  | PHF2      |
| ENSG00000197727 | 0           | 0.697730409 | pseudogene       | 16 | 691039    | 691688    |           |
| ENSG00000197728 | 6.228441838 | 7.033288635 | protein_coding   | 12 | 56435637  | 56438116  | RPS26     |
| ENSG00000197734 | 0.499066092 | 0           | protein_coding   | 14 | 78227173  | 78236085  | C14orf178 |
| ENSG00000197744 | 1.799000381 | 1.16600992  | pseudogene       | 5  | 118309491 | 118309817 | PTMAP2    |

|                 |             |             |                 |    |           |           |           |
|-----------------|-------------|-------------|-----------------|----|-----------|-----------|-----------|
| ENSG00000197746 | 12.95162415 | 13.39240736 | protein_coding  | 10 | 73576055  | 73611126  | PSAP      |
| ENSG00000197747 | 11.35083198 | 10.75268144 | protein_coding  | 1  | 151955391 | 151966866 | S100A10   |
| ENSG00000197748 | 3.335220907 | 3.781359661 | protein_coding  | 10 | 105889646 | 105992120 | WDR96     |
| ENSG00000197753 | 1.407729925 | 2.242360793 | protein_coding  | 6  | 35773070  | 35801651  | LHFPL5    |
| ENSG00000197756 | 11.23538177 | 11.68040503 | protein_coding  | 2  | 217362912 | 217443903 | RPL37A    |
| ENSG00000197757 | 5.036678094 | 4.94736961  | protein_coding  | 12 | 54384408  | 54424607  | HOXC6     |
| ENSG00000197763 | 6.738827102 | 6.819555981 | protein_coding  | 3  | 126290622 | 126373998 | TXNRD3    |
| ENSG00000197766 | 6.171673665 | 6.235021771 | protein_coding  | 19 | 859665    | 863606    | CFD       |
| ENSG00000197768 | 1.960915222 | 3.081239798 | protein_coding  | 9  | 140145713 | 140147934 | C9orf173  |
| ENSG00000197769 | 1.616589159 | 1.925536307 | protein_coding  | 1  | 242158792 | 242162375 | MAP1LC3C  |
| ENSG00000197771 | 10.06867432 | 10.57791229 | protein_coding  | 10 | 121588972 | 121652068 | MCMBP     |
| ENSG00000197774 | 7.737655476 | 7.754113435 | protein_coding  | 16 | 1823208   | 1831709   | EME2      |
| ENSG00000197776 | 2.238690726 | 2.652276565 | protein_coding  | 14 | 50159823  | 50219870  | KLHDC1    |
| ENSG00000197779 | 6.305850085 | 6.771086752 | protein_coding  | X  | 47696301  | 47861960  | ZNF81     |
| ENSG00000197780 | 7.703736051 | 7.890820294 | protein_coding  | 1  | 109605121 | 109618624 | TAF13     |
| ENSG00000197782 | 5.036678094 | 5.200150955 | protein_coding  | 19 | 40570428  | 40596845  | ZNF780A   |
| ENSG00000197785 | 9.487155506 | 9.379761309 | protein_coding  | 1  | 1447531   | 1470067   | ATAD3A    |
| ENSG00000197798 | 7.63640659  | 8.063427911 | protein_coding  | 11 | 126081309 | 126132881 | FAM118B   |
| ENSG00000197808 | 5.4452544   | 5.446377228 | protein_coding  | 19 | 37128283  | 37157743  | ZNF461    |
| ENSG00000197813 | 4.230497448 | 3.679994897 | protein_coding  | 19 | 49831424  | 49843559  |           |
| ENSG00000197815 | 1.960915222 | 2.912743273 | pseudogene      | 17 | 17761583  | 17762295  |           |
| ENSG00000197816 | 2.471521042 | 3.232099092 | protein_coding  | 9  | 100000765 | 100140806 | C9orf174  |
| ENSG00000197818 | 8.227927477 | 8.275187599 | protein_coding  | 20 | 48429250  | 48508779  | SLC9A8    |
| ENSG00000197822 | 6.050961887 | 5.486957566 | protein_coding  | 5  | 68788119  | 68853931  | OCLN      |
| ENSG00000197825 | 0           | 0.390640832 | pseudogene      | 17 | 26529824  | 26530831  |           |
| ENSG00000197830 | 2.471521042 | 1.925536307 | pseudogene      | 5  | 137881629 | 137882992 |           |
| ENSG00000197837 | 5.512107582 | 4.385599336 | protein_coding  | 12 | 14920933  | 14924065  | HIST4H4   |
| ENSG00000197841 | 5.207774174 | 5.792353798 | protein_coding  | 19 | 35225061  | 35233777  | ZNF181    |
| ENSG00000197844 | 0.499066092 | 1.802319292 | pseudogene      | 1  | 149689368 | 149689854 |           |
| ENSG00000197846 | 2.928422289 | 2.334191469 | protein_coding  | 6  | 26199748  | 26200942  | HIST1H2BF |
| ENSG00000197847 | 5.054730169 | 3.133298822 | pseudogene      | 11 | 64981311  | 65010228  | SLC22A20  |
| ENSG00000197848 | 0           | 0.390640832 | pseudogene      | 6  | 26864126  | 26865739  |           |
| ENSG00000197852 | 4.165528823 | 4.826083323 | protein_coding  | 1  | 112223252 | 112298446 | FAM212B   |
| ENSG00000197857 | 7.423680977 | 7.512619979 | protein_coding  | 19 | 12358092  | 12405702  | ZNF44     |
| ENSG00000197858 | 9.894817144 | 10.25636687 | protein_coding  | 8  | 145137493 | 145141119 | GPAA1     |
| ENSG00000197859 | 2.35979773  | 2.144285137 | protein_coding  | 9  | 136397286 | 136440641 | ADAMTSL2  |
| ENSG00000197860 | 6.851544845 | 6.592001111 | protein_coding  | 5  | 64961755  | 65018862  | SGTB      |
| ENSG00000197863 | 5.60078458  | 5.742946029 | protein_coding  | 19 | 37309224  | 37341215  | ZNF790    |
| ENSG00000197870 | 1.616589159 | 0.390640832 | polymorphic_pse | 12 | 11418857  | 11422739  | PRB3      |
| ENSG00000197879 | 11.87966549 | 12.06664909 | protein_coding  | 17 | 1367480   | 1395995   | MYO1C     |
| ENSG00000197882 | 0           | 0.697730409 | pseudogene      | 11 | 86543582  | 86544491  | OR7E13P   |
| ENSG00000197885 | 5.763291843 | 6.104183162 | protein_coding  | 3  | 23933151  | 23988082  | NKIRAS1   |
| ENSG00000197889 | 1.616589159 | 0.697730409 | protein_coding  | 10 | 15001438  | 15030049  | MEIG1     |
| ENSG00000197892 | 7.734859118 | 7.527286218 | protein_coding  | 8  | 28924796  | 29120641  | KIF13B    |
| ENSG00000197893 | 0.499066092 | 0           | protein_coding  | 10 | 115348475 | 115423805 | NRAP      |
| ENSG00000197894 | 9.187164314 | 9.580028658 | protein_coding  | 4  | 99992132  | 100009952 | ADH5      |
| ENSG00000197903 | 8.640267888 | 8.953504395 | protein_coding  | 6  | 27106073  | 27114619  | HIST1H2BK |
| ENSG00000197905 | 8.738466022 | 8.146522054 | protein_coding  | 12 | 3068496   | 3149839   | TEAD4     |
| ENSG00000197912 | 9.959725563 | 10.18184912 | protein_coding  | 16 | 89557325  | 89624176  | SPG7      |
| ENSG00000197914 | 1.799000381 | 0.697730409 | protein_coding  | 6  | 27798952  | 27799305  | HIST1H4K  |
| ENSG00000197915 | 3.077135474 | 3.32456471  | protein_coding  | 1  | 152184558 | 152196669 | HRNR      |
| ENSG00000197927 | 5.431503808 | 5.742946029 | protein_coding  | 2  | 132479948 | 132524973 | C2orf27A  |
| ENSG00000197928 | 6.535310252 | 6.601272494 | protein_coding  | 19 | 53727087  | 53758126  | ZNF677    |
| ENSG00000197930 | 10.8858896  | 10.82791383 | protein_coding  | 14 | 53106634  | 53162618  | ERO1L     |
| ENSG00000197932 | 5.625150983 | 5.526427614 | protein_coding  | X  | 154114635 | 154116335 | F8A1      |
| ENSG00000197933 | 6.738827102 | 6.926693689 | protein_coding  | 19 | 11832081  | 11849824  | ZNF823    |
| ENSG00000197935 | 4.322773689 | 5.045726316 | protein_coding  | 6  | 28962562  | 28973387  | ZNF311    |
| ENSG00000197937 | 7.768062907 | 8.138583935 | protein_coding  | 19 | 53641958  | 53662322  | ZNF347    |
| ENSG00000197943 | 5.270908378 | 3.87606762  | protein_coding  | 16 | 81772702  | 81991899  | PLCG2     |
| ENSG00000197948 | 7.990682129 | 7.551403417 | protein_coding  | 5  | 141018869 | 141030986 | FCHSD1    |
| ENSG00000197951 | 7.784382559 | 7.928139131 | protein_coding  | 19 | 57106664  | 57135540  | ZNF71     |
| ENSG00000197956 | 12.7820982  | 13.1210813  | protein_coding  | 1  | 153507075 | 153508720 | S100A6    |
| ENSG00000197958 | 11.62808663 | 11.72628042 | protein_coding  | 9  | 130209953 | 130213684 | RPL12     |



|                 |             |             |                  |    |           |           |          |
|-----------------|-------------|-------------|------------------|----|-----------|-----------|----------|
| ENSG00000197959 | 4.437288965 | 4.888000647 | protein_coding   | 1  | 171810621 | 172387606 | DNM3     |
| ENSG00000197961 | 9.204449373 | 9.145559356 | protein_coding   | 19 | 9672859   | 9695209   | ZNF121   |
| ENSG00000197965 | 10.32629262 | 10.50445563 | protein_coding   | 1  | 167690429 | 167761156 | MPZL1    |
| ENSG00000197969 | 6.609746388 | 9.652057897 | protein_coding   | 9  | 79792269  | 80036457  | VPS13A   |
| ENSG00000197971 | 8.890689734 | 7.933654619 | protein_coding   | 18 | 74690783  | 74845639  | MBP      |
| ENSG00000197976 | 8.970118399 | 9.240587696 | protein_coding   | X  | 1710486   | 1721407   | AKAP17A  |
| ENSG00000197977 | 0.869158192 | 0.950786998 | protein_coding   | 6  | 10980992  | 11044547  | ELOVL2   |
| ENSG00000197980 | 3.603959378 | 2.420525079 | protein_coding   | 3  | 156543270 | 156697347 |          |
| ENSG00000197982 | 7.420203928 | 8.180940029 | protein_coding   | 1  | 38272651  | 38275126  | C1orf122 |
| ENSG00000197989 | 7.906207969 | 8.748683701 | processed_transc | 1  | 28905050  | 28909495  | SNHG12   |
| ENSG00000197993 | 0.499066092 | 1.16600992  | protein_coding   | 7  | 142638201 | 142659768 | KEL      |
| ENSG00000198000 | 9.582785382 | 9.772877733 | protein_coding   | 9  | 95059640  | 95087918  | NOL8     |
| ENSG00000198001 | 7.214780754 | 7.148445524 | protein_coding   | 12 | 44152747  | 44183346  | IRAK4    |
| ENSG00000198003 | 4.543379137 | 5.175534283 | protein_coding   | 19 | 11531273  | 11546603  | CCDC151  |
| ENSG00000198010 | 0.499066092 | 0.390640832 | protein_coding   | 8  | 1449531   | 1656642   | DLGAP2   |
| ENSG00000198015 | 8.329659793 | 8.496293532 | protein_coding   | 12 | 93861264  | 93897545  | MRPL42   |
| ENSG00000198018 | 7.084651883 | 7.652976045 | protein_coding   | 10 | 101419263 | 101465997 | ENTPD7   |
| ENSG00000198026 | 9.259966624 | 9.166009895 | protein_coding   | 20 | 44577292  | 44600833  | ZNF335   |
| ENSG00000198028 | 7.218789138 | 7.527286218 | protein_coding   | 19 | 9577031   | 9609279   | ZNF560   |
| ENSG00000198034 | 12.98282172 | 13.52033115 | protein_coding   | X  | 71475529  | 71497150  | RPS4X    |
| ENSG00000198039 | 6.658471572 | 5.96747225  | protein_coding   | 7  | 64330550  | 64391344  | ZNF273   |
| ENSG00000198040 | 7.671926738 | 8.138583935 | protein_coding   | 12 | 133613878 | 133639885 | ZNF84    |
| ENSG00000198042 | 8.156585168 | 8.365015357 | protein_coding   | 8  | 33342268  | 33358687  | MAK16    |
| ENSG00000198046 | 6.798966424 | 6.95589788  | protein_coding   | 19 | 56950696  | 56988770  | ZNF667   |
| ENSG00000198053 | 10.37963191 | 10.60955597 | protein_coding   | 20 | 1875154   | 1920543   | SIRPA    |
| ENSG00000198055 | 8.955779984 | 9.315025211 | protein_coding   | 5  | 176830205 | 176869902 | GRK6     |
| ENSG00000198056 | 8.197783135 | 8.66273344  | protein_coding   | 12 | 57125372  | 57146157  | PRIM1    |
| ENSG00000198060 | 8.885655987 | 9.155034101 | protein_coding   | 10 | 94050920  | 94113721  | 5-Mar    |
| ENSG00000198064 | 5.637181576 | 5.294620694 | protein_coding   | 16 | 30234258  | 30265831  |          |
| ENSG00000198074 | 3.077135474 | 1.353254395 | protein_coding   | 7  | 134212344 | 134226160 | AKR1B10  |
| ENSG00000198077 | 0.499066092 | 0           | protein_coding   | 19 | 41381344  | 41388657  | CYP2A7   |
| ENSG00000198081 | 6.469548347 | 6.559073862 | protein_coding   | 18 | 5289018   | 5296039   | ZFP161   |
| ENSG00000198087 | 9.499564655 | 9.723848155 | protein_coding   | 6  | 47445525  | 47594999  | CD2AP    |
| ENSG00000198088 | 6.171673665 | 5.824376633 | protein_coding   | X  | 106366657 | 106449670 | NUP62CL  |
| ENSG00000198089 | 9.482161805 | 9.930602076 | protein_coding   | 22 | 31884674  | 32014572  | SFI1     |
| ENSG00000198090 | 1.16343121  | 0           | protein_coding   | 17 | 39295685  | 39296739  | KRTAP4-6 |
| ENSG00000198093 | 7.596913151 | 7.811159227 | protein_coding   | 19 | 52392489  | 52408305  | ZNF649   |
| ENSG00000198100 | 1.16343121  | 0           | pseudogene       | 9  | 74576256  | 74576469  |          |
| ENSG00000198105 | 6.421663777 | 7.666288907 | protein_coding   | 10 | 38091751  | 38147034  | ZNF248   |
| ENSG00000198106 | 7.363400307 | 7.384230902 | protein_coding   | 16 | 29262829  | 29519817  | SNX29P2  |
| ENSG00000198108 | 5.417620896 | 3.608232228 | protein_coding   | 5  | 129240165 | 129522327 | CHSY3    |
| ENSG00000198113 | 10.00626968 | 9.569438796 | protein_coding   | 9  | 140172201 | 140177093 | C9orf167 |
| ENSG00000198121 | 6.804311337 | 4.342020395 | protein_coding   | 9  | 113635543 | 113800981 | LPAR1    |
| ENSG00000198125 | 7.845284967 | 7.609989438 | protein_coding   | 22 | 36002811  | 36033998  | MB       |
| ENSG00000198130 | 7.474855471 | 7.454976247 | protein_coding   | 2  | 191054461 | 191208919 | HIBCH    |
| ENSG00000198131 | 9.394512382 | 9.29873313  | protein_coding   | 19 | 58740070  | 58775010  | ZNF544   |
| ENSG00000198133 | 4.883502971 | 4.29708397  | protein_coding   | 14 | 67913801  | 68000456  | TMEM229B |
| ENSG00000198134 | 1.616589159 | 1.802319292 | pseudogene       | 12 | 12264097  | 12264423  |          |
| ENSG00000198142 | 9.490475063 | 8.063427911 | protein_coding   | 2  | 110371911 | 110376563 | ANKRD57  |
| ENSG00000198146 | 8.096857104 | 8.378559146 | protein_coding   | 15 | 35270542  | 35280488  | ZNF770   |
| ENSG00000198150 | 4.437288965 | 4.857374129 | protein_coding   | 17 | 8261731   | 8263538   |          |
| ENSG00000198153 | 0           | 0.390640832 | protein_coding   | 19 | 22867969  | 22869468  |          |
| ENSG00000198155 | 5.431503808 | 5.486957566 | pseudogene       | 4  | 206399    | 249774    | ZNF876P  |
| ENSG00000198156 | 0.499066092 | 0.950786998 | protein_coding   | 16 | 28353876  | 28374829  |          |
| ENSG00000198157 | 6.163378456 | 6.097646709 | protein_coding   | X  | 80369200  | 80457441  | HMGNS    |
| ENSG00000198160 | 8.591637531 | 8.822881621 | protein_coding   | 1  | 67390578  | 67454302  | MIER1    |
| ENSG00000198161 | 0.499066092 | 0           | protein_coding   | 1  | 149553003 | 149553787 | PPIAL4C  |
| ENSG00000198162 | 8.704565874 | 8.92701904  | protein_coding   | 1  | 117910071 | 118071494 | MAN1A2   |
| ENSG00000198168 | 7.102117104 | 7.586839732 | protein_coding   | 11 | 22835345  | 22851845  | SVIP     |
| ENSG00000198169 | 6.9512803   | 7.510161044 | protein_coding   | 8  | 145946298 | 145981802 | ZNF251   |
| ENSG00000198171 | 9.370391259 | 10.33627517 | protein_coding   | 20 | 3170996   | 3185331   | DDRGK1   |
| ENSG00000198176 | 9.9233443   | 9.721192935 | protein_coding   | 13 | 114239013 | 114295504 | TFDP1    |
| ENSG00000198182 | 7.218789138 | 6.919299326 | protein_coding   | 19 | 38187264  | 38210691  | ZNF607   |

|                 |             |             |                  |    |           |           |           |
|-----------------|-------------|-------------|------------------|----|-----------|-----------|-----------|
| ENSG00000198185 | 4.923348194 | 4.29708397  | protein_coding   | 20 | 45129709  | 45142198  | ZNF334    |
| ENSG00000198189 | 7.96466218  | 8.254769334 | protein_coding   | 4  | 88257762  | 88312538  | HSD17B11  |
| ENSG00000198198 | 8.662511098 | 8.776573399 | protein_coding   | 1  | 43855553  | 43918321  | SZT2      |
| ENSG00000198203 | 0.499066092 | 0.390640832 | protein_coding   | 2  | 108905095 | 108926371 | SULT1C2   |
| ENSG00000198205 | 5.286269488 | 5.674321415 | protein_coding   | X  | 57931864  | 57937067  | ZXDA      |
| ENSG00000198208 | 7.444369108 | 7.926295939 | protein_coding   | 14 | 75370657  | 75390099  | RP56KL1   |
| ENSG00000198211 | 2.671945279 | 1.16600992  | protein_coding   | 16 | 89987800  | 90005169  | TUBB3     |
| ENSG00000198218 | 9.841872234 | 9.652615414 | protein_coding   | 3  | 49067140  | 49131796  | QRICH1    |
| ENSG00000198221 | 3.146112541 | 3.453019579 | processed_transc | 6  | 168224556 | 168227466 | C6orf124  |
| ENSG00000198223 | 3.652182994 | 3.64455972  | protein_coding   | X  | 1387693   | 1429274   | CSF2RA    |
| ENSG00000198225 | 4.131913373 | 4.406904905 | protein_coding   | 6  | 63921351  | 63922929  | FKBP1C    |
| ENSG00000198231 | 10.58844284 | 10.88240534 | protein_coding   | 17 | 61851567  | 61896676  | DDX42     |
| ENSG00000198237 | 1.16343121  | 1.518964905 | pseudogene       | 5  | 69171098  | 69274436  |           |
| ENSG00000198242 | 10.05696733 | 10.05811545 | protein_coding   | 17 | 27046411  | 27051377  | RPL23A    |
| ENSG00000198246 | 6.676071387 | 6.403479675 | protein_coding   | 10 | 73079015  | 73123142  | SLC29A3   |
| ENSG00000198250 | 0.499066092 | 0.390640832 | protein_coding   | 10 | 47657581  | 47701443  | ANTXR1    |
| ENSG00000198252 | 8.371669553 | 8.25035614  | protein_coding   | 14 | 53196898  | 53241716  | STYX      |
| ENSG00000198258 | 10.02241241 | 10.71740993 | protein_coding   | 19 | 9938568   | 9940797   | UBL5      |
| ENSG00000198265 | 9.297405929 | 9.342237258 | protein_coding   | 17 | 65066555  | 65241319  | HELZ      |
| ENSG00000198270 | 5.124761037 | 6.057793599 | protein_coding   | 12 | 112369102 | 112450935 | TMEM116   |
| ENSG00000198276 | 9.003030709 | 9.078264676 | protein_coding   | 20 | 62571186  | 62587769  | UCKL1     |
| ENSG00000198286 | 8.195750939 | 5.734544355 | protein_coding   | 7  | 2945775   | 3083579   | CARD11    |
| ENSG00000198298 | 6.220467583 | 6.198834244 | protein_coding   | 10 | 44101855  | 44113351  | ZNF485    |
| ENSG00000198300 | 5.40360309  | 5.974624386 | protein_coding   | 19 | 57321445  | 57352096  | ZIM2      |
| ENSG00000198301 | 8.98077946  | 9.253141197 | protein_coding   | 4  | 76862103  | 76912115  | SDAD1     |
| ENSG00000198315 | 7.367016815 | 7.586839732 | protein_coding   | 6  | 28109716  | 28124089  | ZNF192    |
| ENSG00000198324 | 8.504022011 | 7.394933125 | protein_coding   | 12 | 111798339 | 111806925 | FAM109A   |
| ENSG00000198326 | 0.869158192 | 1.16600992  | protein_coding   | 20 | 2795614   | 2800930   | TMEM239   |
| ENSG00000198327 | 1.16343121  | 0.697730409 | protein_coding   | 6  | 26240561  | 26240976  | HIST1H4F  |
| ENSG00000198331 | 7.511262389 | 8.093304774 | protein_coding   | 11 | 125753509 | 125770543 | HYLS1     |
| ENSG00000198336 | 0           | 1.353254395 | protein_coding   | 17 | 45286428  | 45301045  | MYL4      |
| ENSG00000198339 | 4.712111592 | 3.906303962 | protein_coding   | 6  | 27107076  | 27108418  | HIST1H4I  |
| ENSG00000198342 | 4.322773689 | 4.872768657 | protein_coding   | 19 | 12460185  | 12476719  | ZNF442    |
| ENSG00000198346 | 7.406211319 | 7.04352744  | protein_coding   | 19 | 53970989  | 54006950  | ZNF813    |
| ENSG00000198353 | 5.588445295 | 6.505763096 | protein_coding   | 12 | 54410715  | 54449814  | HOXC4     |
| ENSG00000198355 | 9.699971044 | 9.576507334 | protein_coding   | 22 | 50354161  | 50357728  | PIM3      |
| ENSG00000198356 | 10.44311177 | 11.066044   | protein_coding   | 19 | 12848306  | 12859137  | ASNA1     |
| ENSG00000198358 | 0           | 0.697730409 | processed_transc | 1  | 160902255 | 160919712 |           |
| ENSG00000198363 | 11.75478782 | 10.7532014  | protein_coding   | 8  | 62413115  | 62627199  | ASPH      |
| ENSG00000198366 | 2.762599152 | 1.667587519 | protein_coding   | 6  | 26020718  | 26021186  | HIST1H3A  |
| ENSG00000198369 | 8.346244381 | 8.038049013 | protein_coding   | 2  | 65537985  | 65659771  | SPRED2    |
| ENSG00000198373 | 9.873363279 | 9.567666236 | protein_coding   | 16 | 69796209  | 69975644  | WWP2      |
| ENSG00000198374 | 2.238690726 | 2.242360793 | protein_coding   | 6  | 27833034  | 27833606  | HIST1H2AL |
| ENSG00000198380 | 9.255095676 | 9.074940905 | protein_coding   | 2  | 69546905  | 69614382  | GFPT1     |
| ENSG00000198382 | 8.002356002 | 8.326402026 | protein_coding   | 11 | 75526212  | 75854239  | UVRAG     |
| ENSG00000198388 | 0           | 0.390640832 | pseudogene       | 16 | 14548061  | 14548155  |           |
| ENSG00000198393 | 7.19863491  | 7.022976646 | protein_coding   | 12 | 133562951 | 133589154 | ZNF26     |
| ENSG00000198399 | 8.798620088 | 8.443145654 | protein_coding   | 2  | 24425733  | 24583583  | ITSN2     |
| ENSG00000198400 | 1.799000381 | 1.925536307 | protein_coding   | 1  | 156785432 | 156851642 | NTRK1     |
| ENSG00000198406 | 2.471521042 | 2.420525079 | pseudogene       | 3  | 116364592 | 116365574 | BZW1P2    |
| ENSG00000198408 | 11.16908489 | 11.21785423 | protein_coding   | 10 | 103544200 | 103578696 | MGEA5     |
| ENSG00000198414 | 0.499066092 | 0.697730409 | pseudogene       | X  | 44143162  | 44145492  | TATDN2P1  |
| ENSG00000198417 | 3.989024711 | 3.532712221 | protein_coding   | 16 | 56691606  | 56694610  | MT1F      |
| ENSG00000198420 | 9.31529953  | 9.498022112 | protein_coding   | 7  | 143548468 | 143599291 | FAM115A   |
| ENSG00000198429 | 6.393570237 | 5.871116342 | protein_coding   | 19 | 11998599  | 12025144  | ZNF69     |
| ENSG00000198431 | 12.4886153  | 11.76314651 | protein_coding   | 12 | 104609557 | 104744061 | TXNRD1    |
| ENSG00000198435 | 7.337827682 | 7.694718794 | protein_coding   | 9  | 140194083 | 140196703 | NRARP     |
| ENSG00000198440 | 6.379315619 | 6.937714655 | protein_coding   | 19 | 56915383  | 56938733  | ZNF583    |
| ENSG00000198443 | 0.499066092 | 0           | protein_coding   | 17 | 39340354  | 39341594  | KRTAP4-1  |
| ENSG00000198453 | 6.462804234 | 6.677762549 | protein_coding   | 19 | 37407231  | 37488834  | ZNF568    |
| ENSG00000198455 | 7.654275977 | 7.752033772 | protein_coding   | X  | 57618269  | 57623906  | ZXDB      |
| ENSG00000198464 | 7.921045056 | 7.966311947 | protein_coding   | 19 | 52800425  | 52827333  | ZNF480    |
| ENSG00000198466 | 9.212512411 | 9.253141197 | protein_coding   | 19 | 58331094  | 58376485  | ZNF587    |

|                 |             |             |                  |    |           |           |            |
|-----------------|-------------|-------------|------------------|----|-----------|-----------|------------|
| ENSG00000198467 | 7.916116295 | 9.292307546 | protein_coding   | 9  | 35681989  | 35691017  | TPM2       |
| ENSG00000198468 | 5.525114348 | 5.893930351 | processed_transc | 1  | 213025450 | 213031430 | FLVCR1-AS1 |
| ENSG00000198471 | 0           | 0.390640832 | protein_coding   | 3  | 187416047 | 187420345 | RTP2       |
| ENSG00000198477 | 7.123655438 | 7.275499917 | protein_coding   | 22 | 22838767  | 22863505  | ZNF280B    |
| ENSG00000198478 | 5.255381949 | 6.204928885 | protein_coding   | 6  | 80341000  | 80413372  | SH3BGRL2   |
| ENSG00000198482 | 8.12703021  | 7.842771865 | protein_coding   | 19 | 53030905  | 53077383  | ZNF808     |
| ENSG00000198488 | 0.499066092 | 0           | protein_coding   | 11 | 76745385  | 76753096  | B3GNT6     |
| ENSG00000198492 | 9.849001727 | 9.664273773 | protein_coding   | 1  | 29063133  | 29096287  | YTHDF2     |
| ENSG00000198496 | 5.967663407 | 5.960284481 | protein_coding   | 17 | 41277609  | 41305688  | NBR2       |
| ENSG00000198498 | 7.988335976 | 8.096586553 | protein_coding   | 4  | 164415594 | 164441691 | C4orf43    |
| ENSG00000198513 | 3.448790144 | 2.971122874 | protein_coding   | 14 | 50999227  | 51099786  | ATL1       |
| ENSG00000198515 | 1.616589159 | 1.925536307 | protein_coding   | 4  | 47937994  | 48018689  | CNGA1      |
| ENSG00000198517 | 9.407740769 | 8.741364159 | protein_coding   | 7  | 1570350   | 1582679   | MAFK       |
| ENSG00000198518 | 3.871730003 | 2.579085888 | protein_coding   | 6  | 26204858  | 26206266  | HIST1H4E   |
| ENSG00000198520 | 2.10647801  | 2.334191469 | protein_coding   | 1  | 45140364  | 45191263  | C1orf228   |
| ENSG00000198521 | 7.717966186 | 7.681666888 | protein_coding   | 19 | 21990085  | 22034830  | ZNF43      |
| ENSG00000198522 | 8.221948786 | 8.427593853 | protein_coding   | 2  | 27851114  | 27874375  | GPN1       |
| ENSG00000198523 | 0.499066092 | 0.697730409 | protein_coding   | 6  | 118869461 | 118881893 | PLN        |
| ENSG00000198526 | 0           | 0.390640832 | pseudogene       | 2  | 147345012 | 147346878 | PABPC1P2   |
| ENSG00000198535 | 1.799000381 | 2.334191469 | protein_coding   | 15 | 62359176  | 62361103  | C2CD4A     |
| ENSG00000198538 | 8.755121984 | 8.387964709 | protein_coding   | 19 | 53300662  | 53324922  | ZNF28      |
| ENSG00000198542 | 2.671945279 | 2.579085888 | protein_coding   | 13 | 102104966 | 102371145 | ITGBL1     |
| ENSG00000198546 | 7.663128351 | 8.122575449 | protein_coding   | 10 | 135121979 | 135166033 | ZNF511     |
| ENSG00000198551 | 7.642387679 | 8.029489191 | protein_coding   | 19 | 11708235  | 11729974  | ZNF627     |
| ENSG00000198553 | 1.16343121  | 0.390640832 | protein_coding   | 13 | 50589390  | 50595058  | KCNRG      |
| ENSG00000198554 | 8.931561329 | 9.241329169 | protein_coding   | 14 | 55405668  | 55493823  | WDHD1      |
| ENSG00000198555 | 0.499066092 | 1.16600992  | pseudogene       | 16 | 33778506  | 33790097  |            |
| ENSG00000198556 | 7.119373418 | 7.38691391  | protein_coding   | 7  | 99070464  | 99101273  | ZNF789     |
| ENSG00000198558 | 0           | 0.390640832 | protein_coding   | 6  | 27840926  | 27841289  | HIST1H4L   |
| ENSG00000198561 | 11.70350483 | 11.42114433 | protein_coding   | 11 | 57520715  | 57587018  | CTNND1     |
| ENSG00000198563 | 10.10160874 | 10.27567734 | protein_coding   | 6  | 31497996  | 31510225  | DDX39B     |
| ENSG00000198569 | 3.448790144 | 3.279072565 | protein_coding   | 9  | 140125209 | 140131006 | SLC34A3    |
| ENSG00000198573 | 0           | 0.390640832 | protein_coding   | X  | 140335596 | 140336629 | SPANXC     |
| ENSG00000198576 | 3.335220907 | 1.802319292 | protein_coding   | 8  | 143692410 | 143695833 | ARC        |
| ENSG00000198580 | 3.989024711 | 4.075511708 | protein_coding   | 7  | 6713376   | 6715991   |            |
| ENSG00000198585 | 8.653654925 | 8.69448524  | protein_coding   | 3  | 131100515 | 131107674 | NUDT16     |
| ENSG00000198586 | 9.105088364 | 8.677053487 | protein_coding   | 2  | 171847333 | 172087824 | TLK1       |
| ENSG00000198589 | 9.740963079 | 9.420268302 | protein_coding   | 4  | 151185594 | 151936879 | LRBA       |
| ENSG00000198590 | 2.57521082  | 1.925536307 | protein_coding   | 3  | 37427760  | 37476988  | C3orf35    |
| ENSG00000198598 | 8.295907473 | 7.760334499 | protein_coding   | 12 | 132312938 | 132336328 | MMP17      |
| ENSG00000198604 | 10.11296043 | 10.38238014 | protein_coding   | 14 | 35221937  | 35344853  | BAZ1A      |
| ENSG00000198610 | 0.499066092 | 0           | protein_coding   | 10 | 5237426   | 5260912   | AKR1C4     |
| ENSG00000198612 | 8.970118399 | 8.916844293 | protein_coding   | 2  | 237993955 | 238009109 | COPS8      |
| ENSG00000198618 | 3.652182994 | 2.579085888 | pseudogene       | 21 | 20230097  | 20230594  | PPIAP22    |
| ENSG00000198624 | 4.517578978 | 3.608232228 | protein_coding   | 5  | 150560613 | 150603706 | CCDC69     |
| ENSG00000198625 | 8.282565319 | 8.702045897 | protein_coding   | 1  | 204485511 | 204542871 | MDM4       |
| ENSG00000198626 | 2.35979773  | 0           | protein_coding   | 1  | 237205505 | 238129359 | RYR2       |
| ENSG00000198633 | 3.652182994 | 3.935919592 | protein_coding   | 19 | 52932440  | 52955568  | ZNF534     |
| ENSG00000198642 | 6.830742851 | 7.167295693 | protein_coding   | 9  | 21329670  | 21335379  | KLHL9      |
| ENSG00000198646 | 10.39122196 | 10.26295417 | protein_coding   | 20 | 33302578  | 33413452  | NCOA6      |
| ENSG00000198648 | 8.797280438 | 8.288162655 | protein_coding   | 2  | 168810530 | 169104651 | STK39      |
| ENSG00000198650 | 0.869158192 | 0           | protein_coding   | 16 | 71599563  | 71611033  | TAT        |
| ENSG00000198663 | 8.658089807 | 9.089837938 | protein_coding   | 6  | 36839646  | 36892331  | C6orf89    |
| ENSG00000198668 | 11.91019599 | 11.65127045 | protein_coding   | 14 | 90862846  | 90874605  | CALM1      |
| ENSG00000198673 | 1.16343121  | 2.039052734 | protein_coding   | 12 | 62102040  | 62672931  | FAM19A2    |
| ENSG00000198677 | 9.811670266 | 9.928301652 | protein_coding   | 5  | 94799599  | 94890711  | TTC37      |
| ENSG00000198680 | 6.386460534 | 6.862599506 | protein_coding   | 9  | 25676396  | 25678856  | TUSC1      |
| ENSG00000198682 | 10.15697238 | 10.30611722 | protein_coding   | 10 | 89419370  | 89507462  | PAPSS2     |
| ENSG00000198685 | 0.499066092 | 0.950786998 | protein_coding   | 3  | 128290843 | 128294929 | C3orf27    |
| ENSG00000198689 | 8.066039442 | 8.166959047 | protein_coding   | X  | 135067598 | 135129423 | SLC9A6     |
| ENSG00000198690 | 7.491518048 | 7.619146302 | protein_coding   | 15 | 31196055  | 31235311  | FAN1       |
| ENSG00000198691 | 0.869158192 | 1.16600992  | protein_coding   | 1  | 94458391  | 94586688  | ABCA4      |
| ENSG00000198695 | 13.93068312 | 12.97265035 | protein_coding   | MT | 14149     | 14673     | MT-ND6     |

|                 |             |             |                |    |    |           |           |           |
|-----------------|-------------|-------------|----------------|----|----|-----------|-----------|-----------|
| ENSG00000198700 | 10.46352509 | 10.55870647 | protein_coding |    | 1  | 201798269 | 201853422 | IPO9      |
| ENSG00000198707 | 7.888702948 | 8.101495266 | protein_coding |    | 12 | 88442794  | 88535993  | CEP290    |
| ENSG00000198711 | 1.16343121  | 1.667587519 | protein_coding |    | 1  | 54703710  | 54704736  | C1orf191  |
| ENSG00000198712 | 16.50549691 | 16.0178658  | protein_coding | MT |    | 7586      | 8269      | MT-CO2    |
| ENSG00000198715 | 7.717966186 | 8.81990641  | protein_coding |    | 1  | 156259880 | 156265463 | C1orf85   |
| ENSG00000198718 | 7.071412799 | 7.470237199 | protein_coding |    | 14 | 45431393  | 45543634  | FAM179B   |
| ENSG00000198719 | 1.799000381 | 1.518964905 | protein_coding |    | 6  | 170591294 | 170599561 | DLL1      |
| ENSG00000198720 | 9.022652927 | 8.560682282 | protein_coding |    | 17 | 27916801  | 27941779  | ANKRD13B  |
| ENSG00000198721 | 8.3480754   | 8.334763756 | protein_coding |    | 6  | 4115923   | 4135831   | ECI2      |
| ENSG00000198722 | 8.505663452 | 8.797898671 | protein_coding |    | 9  | 35161999  | 35405335  | UNC13B    |
| ENSG00000198723 | 2.10647801  | 3.532712221 | protein_coding |    | 19 | 7557862   | 7573336   | C19orf45  |
| ENSG00000198727 | 16.0895307  | 15.52778963 | protein_coding | MT |    | 14747     | 15887     | MT-CYB    |
| ENSG00000198728 | 8.865343505 | 9.076603748 | protein_coding |    | 10 | 103867317 | 103880210 | LDB1      |
| ENSG00000198729 | 6.328285199 | 3.845183986 | protein_coding |    | 6  | 150464212 | 150571493 | PPP1R14C  |
| ENSG00000198730 | 9.27062517  | 9.307964293 | protein_coding |    | 11 | 10772534  | 10801290  | CTR9      |
| ENSG00000198732 | 0.499066092 | 1.518964905 | protein_coding |    | 14 | 70320848  | 70499083  | SMOC1     |
| ENSG00000198734 | 0.499066092 | 0           | protein_coding |    | 1  | 169483404 | 169555826 | F5        |
| ENSG00000198736 | 9.007671769 | 9.152671242 | protein_coding |    | 16 | 1988211   | 1993327   | SEPX1     |
| ENSG00000198739 | 0           | 0.390640832 | protein_coding |    | 10 | 68685764  | 68859588  | LRRTM3    |
| ENSG00000198740 | 8.133414584 | 7.809160246 | protein_coding |    | 17 | 47366568  | 47439835  | ZNF652    |
| ENSG00000198742 | 9.984657349 | 9.159748241 | protein_coding |    | 7  | 98625061  | 98741723  | SMURF1    |
| ENSG00000198743 | 8.560389515 | 9.190788227 | protein_coding |    | 21 | 35445870  | 35478559  | SLC5A3    |
| ENSG00000198744 | 13.22885902 | 12.21604336 | pseudogene     |    | 1  | 569756    | 570302    |           |
| ENSG00000198746 | 7.017207048 | 7.067139131 | protein_coding |    | 1  | 27216979  | 27226962  | GPATCH3   |
| ENSG00000198750 | 1.616589159 | 1.353254395 | protein_coding |    | 7  | 74807499  | 74867509  | GATSL2    |
| ENSG00000198752 | 11.32200903 | 10.33974134 | protein_coding |    | 14 | 103398716 | 103523799 | CDC42BPB  |
| ENSG00000198753 | 8.284478912 | 8.531880603 | protein_coding | X  |    | 153029651 | 153044801 | PLXNB3    |
| ENSG00000198754 | 1.407729925 | 1.16600992  | protein_coding |    | 1  | 40235195  | 40237020  | OXCT2     |
| ENSG00000198755 | 11.47751492 | 11.97712059 | protein_coding |    | 6  | 35436185  | 35438562  | RPL10A    |
| ENSG00000198756 | 0.499066092 | 1.667587519 | protein_coding |    | 1  | 183898796 | 184006863 | GLT25D2   |
| ENSG00000198759 | 2.671945279 | 3.279072565 | protein_coding | X  |    | 13587724  | 13651694  | EGFL6     |
| ENSG00000198763 | 15.35466093 | 14.76967403 | protein_coding | MT |    | 4470      | 5511      | MT-ND2    |
| ENSG00000198768 | 7.689364157 | 7.426571535 | protein_coding |    | 20 | 57034157  | 57090187  | APCDD1L   |
| ENSG00000198771 | 1.960915222 | 3.32456471  | protein_coding |    | 1  | 167599330 | 167675486 | RCSD1     |
| ENSG00000198774 | 2.928422289 | 3.279072565 | protein_coding |    | 12 | 86198331  | 86230348  | RASSF9    |
| ENSG00000198780 | 4.903563137 | 3.96493948  | protein_coding |    | 5  | 74073399  | 74162776  | FAM169A   |
| ENSG00000198783 | 6.738827102 | 7.04352744  | protein_coding |    | 17 | 33288549  | 33290205  | ZNF830    |
| ENSG00000198785 | 4.568725997 | 3.906303962 | protein_coding |    | 9  | 104331635 | 104500862 | GRIN3A    |
| ENSG00000198786 | 15.66788949 | 14.93234384 | protein_coding | MT |    | 12337     | 14148     | MT-ND5    |
| ENSG00000198788 | 3.004694206 | 1.16600992  | protein_coding |    | 11 | 1074875   | 1104419   | MUC2      |
| ENSG00000198791 | 9.465390183 | 9.340162149 | protein_coding |    | 8  | 17086737  | 17104387  | CNOT7     |
| ENSG00000198792 | 10.18848346 | 9.974519463 | protein_coding |    | 22 | 38615298  | 38669040  | TMEM184B  |
| ENSG00000198793 | 10.24608033 | 10.35077746 | protein_coding |    | 1  | 11166592  | 11322608  | MTOR      |
| ENSG00000198794 | 7.119373418 | 7.699043321 | protein_coding |    | 15 | 75249560  | 75313837  | SCAMP5    |
| ENSG00000198795 | 1.407729925 | 0.950786998 | protein_coding |    | 18 | 22641888  | 22932214  | ZNF521    |
| ENSG00000198796 | 5.207774174 | 7.295628905 | protein_coding |    | 18 | 56148479  | 56296189  | ALPK2     |
| ENSG00000198798 | 0           | 0.390640832 | protein_coding | X  |    | 30248553  | 30255607  | MAGEB3    |
| ENSG00000198799 | 7.04456449  | 6.934050347 | protein_coding |    | 1  | 113615831 | 113669822 | LRIG2     |
| ENSG00000198804 | 16.88630592 | 16.32941805 | protein_coding | MT |    | 5904      | 7445      | MT-CO1    |
| ENSG00000198805 | 9.358631958 | 9.498022112 | protein_coding |    | 14 | 20937113  | 20945253  | PNP       |
| ENSG00000198807 | 6.598204782 | 5.824376633 | protein_coding |    | 14 | 37126773  | 37148920  | PAX9      |
| ENSG00000198814 | 6.35766608  | 7.126137778 | protein_coding | X  |    | 30671476  | 30748725  | GK        |
| ENSG00000198815 | 9.373990307 | 9.083236018 | protein_coding |    | 1  | 42642210  | 42801548  | FOXJ3     |
| ENSG00000198816 | 9.502033728 | 10.0132375  | protein_coding |    | 19 | 7581004   | 7585912   | ZNF358    |
| ENSG00000198818 | 8.120617457 | 8.253299769 | protein_coding |    | 6  | 166733216 | 166756079 | SFT2D1    |
| ENSG00000198821 | 1.16343121  | 0.390640832 | protein_coding |    | 1  | 167399877 | 167487847 | CD247     |
| ENSG00000198824 | 8.656613027 | 8.486319932 | protein_coding |    | 13 | 115079988 | 115092796 | CHAMP1    |
| ENSG00000198825 | 7.789781675 | 7.869875863 | protein_coding |    | 10 | 121485609 | 121588652 | INPP5F    |
| ENSG00000198826 | 9.579671796 | 9.505448443 | protein_coding |    | 15 | 32907345  | 32932150  | ARHGAP11A |
| ENSG00000198829 | 0           | 0.390640832 | protein_coding |    | 3  | 151591431 | 151599665 | SUCNR1    |
| ENSG00000198830 | 10.46394731 | 10.62781739 | protein_coding |    | 1  | 26798941  | 26802463  | HMGN2     |
| ENSG00000198832 | 10.32350339 | 12.0544657  | protein_coding |    | 22 | 31500758  | 31516055  |           |
| ENSG00000198833 | 9.349520666 | 9.577682064 | protein_coding |    | 6  | 90036344  | 90062567  | UBE2J1    |

|                 |             |             |                |    |           |           |          |
|-----------------|-------------|-------------|----------------|----|-----------|-----------|----------|
| ENSG00000198835 | 3.78787645  | 3.96493948  | protein_coding | 1  | 228337553 | 228347527 | GJC2     |
| ENSG00000198836 | 10.27476096 | 9.975411057 | protein_coding | 3  | 193310933 | 193415612 | OPA1     |
| ENSG00000198837 | 9.846413258 | 10.11707283 | protein_coding | 1  | 153901977 | 153919172 | DENND4B  |
| ENSG00000198838 | 3.871730003 | 3.608232228 | protein_coding | 15 | 33603163  | 34158303  | RYR3     |
| ENSG00000198839 | 7.35977471  | 7.100213554 | protein_coding | 7  | 111846643 | 111983151 | ZNF277   |
| ENSG00000198840 | 13.37560171 | 12.54993132 | protein_coding | MT | 10059     | 10404     | MT-ND3   |
| ENSG00000198841 | 6.766474304 | 6.915587884 | protein_coding | 1  | 52497775  | 52499488  | KTI12    |
| ENSG00000198842 | 3.502389126 | 3.679994897 | protein_coding | 1  | 167063282 | 167098402 | DUSP27   |
| ENSG00000198843 | 9.024943975 | 9.102135695 | protein_coding | 3  | 150320662 | 150348222 |          |
| ENSG00000198844 | 1.16343121  | 0           | protein_coding | 17 | 8213559   | 8225834   | ARHGEF15 |
| ENSG00000198846 | 1.616589159 | 2.420525079 | protein_coding | 8  | 59717977  | 60031767  | TOX      |
| ENSG00000198853 | 9.342189974 | 9.252405772 | protein_coding | 9  | 35490124  | 35561895  | RUSC2    |
| ENSG00000198855 | 5.986594255 | 6.064512706 | protein_coding | 12 | 108908962 | 108919614 | FICD     |
| ENSG00000198856 | 8.872994239 | 9.506682457 | protein_coding | 4  | 109571740 | 109588976 | OSTC     |
| ENSG00000198857 | 2.57521082  | 2.721932731 | pseudogene     | 1  | 120143963 | 120151873 | HSD3BP5  |
| ENSG00000198858 | 9.866992122 | 10.02964069 | protein_coding | 19 | 896503    | 913225    | R3HDM4   |
| ENSG00000198860 | 7.651313074 | 8.006993014 | protein_coding | 1  | 184020811 | 184043346 | TSEN15   |
| ENSG00000198862 | 8.727254249 | 8.803934152 | protein_coding | 21 | 30300466  | 30365277  | LTN1     |
| ENSG00000198863 | 7.543580762 | 7.225413142 | protein_coding | 17 | 41132582  | 41145707  | RUNDC1   |
| ENSG00000198868 | 1.407729925 | 0.697730409 | pseudogene     | 5  | 134263720 | 134264016 | MIR4461  |
| ENSG00000198870 | 4.568725997 | 3.845183986 | protein_coding | 9  | 136243117 | 136271220 | C9orf96  |
| ENSG00000198873 | 8.103376106 | 8.006993014 | protein_coding | 10 | 120967101 | 121215131 | GRK5     |
| ENSG00000198874 | 7.751556534 | 7.332282157 | protein_coding | 7  | 66460160  | 66704501  | TYW1     |
| ENSG00000198876 | 8.829093615 | 8.736113084 | protein_coding | 9  | 34086522  | 34127397  | DCAF12   |
| ENSG00000198883 | 0           | 0.390640832 | protein_coding | X  | 152157368 | 152162671 | PNMA5    |
| ENSG00000198885 | 0.499066092 | 0           | protein_coding | 2  | 96991069  | 96994091  | ITPRIPL1 |
| ENSG00000198886 | 17.32265143 | 16.48337997 | protein_coding | MT | 10760     | 12137     | MT-ND4   |
| ENSG00000198887 | 8.787867896 | 8.877321491 | protein_coding | 9  | 72873937  | 72969804  | SMC5     |
| ENSG00000198888 | 15.64131492 | 14.90807786 | protein_coding | MT | 3307      | 4262      | MT-ND1   |
| ENSG00000198890 | 6.585843317 | 6.544728831 | protein_coding | 1  | 107599267 | 107601916 | PRMT6    |
| ENSG00000198892 | 6.364918751 | 5.931169853 | protein_coding | 1  | 201857808 | 201861434 | SHISA4   |
| ENSG00000198894 | 8.817245731 | 8.804937616 | protein_coding | 14 | 77564440  | 77583630  | KIAA1737 |
| ENSG00000198898 | 9.680483837 | 9.605016392 | protein_coding | 7  | 116451124 | 116559315 | CAPZA2   |
| ENSG00000198899 | 15.73281317 | 14.74001075 | protein_coding | MT | 8527      | 9207      | MT-ATP6  |
| ENSG00000198900 | 10.72856959 | 10.20255683 | protein_coding | 20 | 39657458  | 39753127  | TOP1     |
| ENSG00000198901 | 10.04685659 | 9.990043357 | protein_coding | 15 | 91509270  | 91538859  | PRC1     |
| ENSG00000198908 | 5.707331524 | 4.17820932  | protein_coding | X  | 101975616 | 102008468 | BHLHB9   |
| ENSG00000198909 | 8.894453552 | 9.223427792 | protein_coding | 17 | 61699801  | 61773667  | MAP3K3   |
| ENSG00000198910 | 8.997208309 | 12.23301123 | protein_coding | X  | 153126969 | 153174677 | L1CAM    |
| ENSG00000198911 | 11.88393152 | 11.19813051 | protein_coding | 22 | 42229109  | 42303312  | SREBF2   |
| ENSG00000198912 | 8.221948786 | 7.998246367 | protein_coding | 1  | 3805689   | 3816857   | C1orf174 |
| ENSG00000198915 | 7.654275977 | 7.070480904 | protein_coding | 10 | 43689983  | 43762367  | RASGEF1A |
| ENSG00000198917 | 8.817245731 | 8.740315472 | protein_coding | 9  | 131581930 | 131592100 | C9orf114 |
| ENSG00000198918 | 11.37953801 | 12.12626962 | protein_coding | X  | 118920467 | 118925606 | RPL39    |
| ENSG00000198919 | 7.717966186 | 8.080102494 | protein_coding | 3  | 108308337 | 108413693 | DZIP3    |
| ENSG00000198920 | 8.53006357  | 9.198444985 | protein_coding | 17 | 6481646   | 6544247   | KIAA0753 |
| ENSG00000198924 | 7.609180529 | 7.973469823 | protein_coding | 10 | 115594488 | 115614142 | DCLRE1A  |
| ENSG00000198925 | 10.27235239 | 10.62753383 | protein_coding | 2  | 220074494 | 220094439 | ATG9A    |
| ENSG00000198929 | 2.928422289 | 1.802319292 | protein_coding | 1  | 162039564 | 162353321 | NOS1AP   |
| ENSG00000198931 | 10.27860633 | 10.36343361 | protein_coding | 16 | 88875747  | 88878352  | APRT     |
| ENSG00000198932 | 3.448790144 | 2.652276565 | protein_coding | X  | 101906294 | 101914008 | GPRASP1  |
| ENSG00000198933 | 6.994006093 | 6.264499759 | protein_coding | 17 | 45772630  | 45789427  | TBKBP1   |
| ENSG00000198934 | 5.316509574 | 6.057793599 | protein_coding | X  | 75648046  | 75651744  | MAGEE1   |
| ENSG00000198937 | 6.931877181 | 7.457530976 | protein_coding | 6  | 37450696  | 37467700  | CCDC167  |
| ENSG00000198938 | 16.35565374 | 15.32639774 | protein_coding | MT | 9207      | 9990      | MT-CO3   |
| ENSG00000198939 | 4.165528823 | 4.640685763 | protein_coding | 5  | 178322895 | 178360213 | ZFP2     |
| ENSG00000198944 | 0.499066092 | 0.697730409 | protein_coding | 5  | 132149033 | 132152488 | ANKRD43  |
| ENSG00000198945 | 5.270908378 | 4.489113623 | protein_coding | 6  | 130334844 | 130462594 | L3MBTL3  |
| ENSG00000198947 | 4.19837882  | 4.342020395 | protein_coding | X  | 31132808  | 33357558  | DMD      |
| ENSG00000198948 | 5.018397273 | 6.563824016 | protein_coding | 4  | 170907748 | 170954182 | MFAP3L   |
| ENSG00000198951 | 9.332049062 | 9.315729406 | protein_coding | 22 | 42428724  | 42466846  | NAGA     |
| ENSG00000198952 | 11.02028398 | 11.08434249 | protein_coding | 1  | 156219015 | 156252616 | SMG5     |
| ENSG00000198954 | 8.515473076 | 8.219079902 | protein_coding | 10 | 70748487  | 70776738  | KIAA1279 |

|                 |             |             |                |    |           |           |           |
|-----------------|-------------|-------------|----------------|----|-----------|-----------|-----------|
| ENSG00000198959 | 12.89200086 | 11.79770842 | protein_coding | 20 | 36756863  | 36794980  | TGM2      |
| ENSG00000198960 | 8.068262669 | 8.495050596 | protein_coding | X  | 100870110 | 100872991 | ARMCX6    |
| ENSG00000198961 | 9.747220804 | 9.624472234 | protein_coding | 5  | 108670410 | 108745695 | PJA2      |
| ENSG00000198964 | 8.739861387 | 8.076782959 | protein_coding | 10 | 52065346  | 52384795  | SGMS1     |
| ENSG00000198972 | 0           | 0.697730409 | miRNA          | 19 | 52196039  | 52196117  | MIRLET7E  |
| ENSG00000198975 | 1.407729925 | 0.950786998 | miRNA          | 11 | 122017229 | 122017301 | MIRLET7A2 |
| ENSG00000198976 | 1.16343121  | 1.16600992  | miRNA          | 1  | 1104385   | 1104467   | MIR429    |
| ENSG00000198981 | 0.499066092 | 0           | miRNA          | 7  | 130561506 | 130561570 | MIR29A    |
| ENSG00000199004 | 2.35979773  | 1.16600992  | miRNA          | 17 | 57918627  | 57918698  | MIR21     |
| ENSG00000199023 | 0           | 0.390640832 | miRNA          | 7  | 1062569   | 1062662   | MIR339    |
| ENSG00000199024 | 0           | 0.697730409 | miRNA          | 20 | 3898141   | 3898218   | MIR103A2  |
| ENSG00000199032 | 0           | 0.390640832 | miRNA          | 3  | 49057581  | 49057667  | MIR425    |
| ENSG00000199036 | 0           | 0.697730409 | miRNA          | 6  | 33175612  | 33175721  | MIR219-1  |
| ENSG00000199053 | 4.689181911 | 5.125003832 | miRNA          | 17 | 7126616   | 7126698   | MIR324    |
| ENSG00000199058 | 0           | 0.390640832 | miRNA          | 4  | 113569641 | 113569713 | MIR302B   |
| ENSG00000199071 | 0.499066092 | 0           | miRNA          | 17 | 28444097  | 28444190  | MIR423    |
| ENSG00000199072 | 0.869158192 | 0.697730409 | miRNA          | 9  | 96938629  | 96938715  | MIRLET7F1 |
| ENSG00000199090 | 0           | 0.390640832 | miRNA          | 11 | 75046136  | 75046230  | MIR326    |
| ENSG00000199097 | 0.499066092 | 0           | miRNA          | X  | 133680644 | 133680741 | MIR424    |
| ENSG00000199102 | 0           | 0.390640832 | miRNA          | 4  | 113569519 | 113569586 | MIR302C   |
| ENSG00000199130 | 0           | 0.390640832 | miRNA          | 16 | 14403142  | 14403228  | MIR365A   |
| ENSG00000199133 | 2.847891871 | 1.353254395 | miRNA          | 9  | 96941116  | 96941202  | MIRLET7D  |
| ENSG00000199165 | 0.499066092 | 0.390640832 | miRNA          | 9  | 96938239  | 96938318  | MIRLET7A1 |
| ENSG00000199169 | 0.499066092 | 0           | miRNA          | 4  | 113569030 | 113569097 | MIR367    |
| ENSG00000199172 | 0.499066092 | 0           | miRNA          | 12 | 95702196  | 95702289  | MIR331    |
| ENSG00000199179 | 0           | 0.697730409 | miRNA          | 12 | 62997466  | 62997550  | MIRLET7I  |
| ENSG00000199200 | 0           | 0.390640832 | misc_RNA       | 10 | 34490908  | 34491002  |           |
| ENSG00000199217 | 0.499066092 | 0           | snRNA          | 11 | 119527021 | 119527126 |           |
| ENSG00000199226 | 0.869158192 | 0.390640832 | snRNA          | X  | 46377201  | 46377303  | RNU6-50   |
| ENSG00000199237 | 0           | 0.697730409 | snRNA          | 12 | 49986887  | 49986996  |           |
| ENSG00000199266 | 0.499066092 | 1.667587519 | snoRNA         | 20 | 37078013  | 37078146  | SNORA60   |
| ENSG00000199273 | 0.499066092 | 1.16600992  | misc_RNA       | 7  | 40167720  | 40167831  |           |
| ENSG00000199293 | 1.960915222 | 3.232099092 | snoRNA         | 17 | 37009116  | 37009247  | SNORA21   |
| ENSG00000199298 | 0           | 0.390640832 | snoRNA         | 17 | 19093343  | 19093558  | SNORD3C   |
| ENSG00000199301 | 0           | 0.390640832 | snRNA          | 16 | 71699994  | 71700100  |           |
| ENSG00000199306 | 0           | 0.390640832 | snRNA          | 3  | 197621378 | 197621484 |           |
| ENSG00000199313 | 1.16343121  | 0           | snRNA          | 9  | 127649689 | 127649828 |           |
| ENSG00000199325 | 1.616589159 | 0           | snRNA          | 11 | 66382435  | 66382561  |           |
| ENSG00000199327 | 0.499066092 | 0           | snRNA          | 3  | 124837941 | 124838044 |           |
| ENSG00000199331 | 0.499066092 | 0.950786998 | misc_RNA       | 9  | 111804666 | 111804767 |           |
| ENSG00000199349 | 0           | 0.697730409 | misc_RNA       | 1  | 206921325 | 206921437 |           |
| ENSG00000199366 | 1.16343121  | 0           | misc_RNA       | 18 | 21161980  | 21162085  |           |
| ENSG00000199377 | 0.499066092 | 0           | snRNA          | 1  | 45187458  | 45187574  | RNU5F-1   |
| ENSG00000199426 | 0.499066092 | 0.390640832 | snRNA          | 17 | 56743898  | 56744058  |           |
| ENSG00000199438 | 0.499066092 | 0           | rRNA           | 14 | 68123822  | 68123928  |           |
| ENSG00000199444 | 0           | 0.390640832 | misc_RNA       | 19 | 12199060  | 12199161  |           |
| ENSG00000199466 | 0.499066092 | 0.950786998 | misc_RNA       | 10 | 126454765 | 126454866 |           |
| ENSG00000199470 | 0           | 0.390640832 | snoRNA         | 7  | 12740383  | 12740514  |           |
| ENSG00000199471 | 0.499066092 | 0.390640832 | misc_RNA       | 1  | 202884008 | 202884108 |           |
| ENSG00000199472 | 0.499066092 | 0           | misc_RNA       | 14 | 74373019  | 74373130  |           |
| ENSG00000199476 | 0.499066092 | 1.518964905 | misc_RNA       | 3  | 48330077  | 48330184  |           |
| ENSG00000199488 | 1.616589159 | 0           | snRNA          | 3  | 170712659 | 170712822 |           |
| ENSG00000199509 | 0.499066092 | 0           | rRNA           | 20 | 21119597  | 21119715  |           |
| ENSG00000199545 | 1.16343121  | 1.353254395 | rRNA           | 5  | 138635541 | 138635657 | RN5S195   |
| ENSG00000199550 | 0.499066092 | 0.950786998 | misc_RNA       | 11 | 2393868   | 2393980   |           |
| ENSG00000199568 | 1.407729925 | 1.518964905 | snRNA          | 15 | 65588389  | 65588504  | RNU5A-1   |
| ENSG00000199591 | 0.499066092 | 0           | misc_RNA       | 3  | 47973298  | 47973404  |           |
| ENSG00000199630 | 0           | 0.697730409 | misc_RNA       | 6  | 90551048  | 90551143  |           |
| ENSG00000199638 | 0           | 0.390640832 | rRNA           | 10 | 70221164  | 70221282  |           |
| ENSG00000199646 | 0.499066092 | 0           | snRNA          | 7  | 138561105 | 138561211 |           |
| ENSG00000199649 | 1.799000381 | 1.667587519 | snoRNA         | 12 | 57037464  | 57037534  | SNORD59B  |
| ENSG00000199667 | 0.499066092 | 0           | misc_RNA       | 8  | 101197366 | 101197467 |           |
| ENSG00000199668 | 0           | 0.390640832 | misc_RNA       | 16 | 11408924  | 11409035  |           |

|                 |             |             |          |    |           |           |          |
|-----------------|-------------|-------------|----------|----|-----------|-----------|----------|
| ENSG00000199676 | 0           | 0.390640832 | misc_RNA | 20 | 34441174  | 34441286  |          |
| ENSG00000199683 | 0.869158192 | 0.950786998 | misc_RNA | 20 | 36603558  | 36603883  |          |
| ENSG00000199691 | 1.16343121  | 1.353254395 | misc_RNA | 20 | 37390171  | 37390485  |          |
| ENSG00000199695 | 0.499066092 | 0           | snRNA    | 22 | 31618731  | 31618839  |          |
| ENSG00000199705 | 0           | 0.390640832 | misc_RNA | X  | 122990912 | 122991013 |          |
| ENSG00000199709 | 0.499066092 | 0.390640832 | snRNA    | 11 | 122797742 | 122797881 |          |
| ENSG00000199715 | 0           | 0.390640832 | misc_RNA | 6  | 18273396  | 18273497  |          |
| ENSG00000199716 | 0           | 0.390640832 | misc_RNA | 14 | 23337027  | 23337126  |          |
| ENSG00000199719 | 0.499066092 | 0.697730409 | misc_RNA | 20 | 18275787  | 18276095  |          |
| ENSG00000199730 | 0.499066092 | 0           | misc_RNA | 15 | 58996051  | 58996353  |          |
| ENSG00000199731 | 0           | 0.697730409 | snRNA    | 5  | 32234872  | 32234981  |          |
| ENSG00000199740 | 0           | 0.390640832 | misc_RNA | 12 | 51333710  | 51333809  |          |
| ENSG00000199751 | 0.499066092 | 0.390640832 | misc_RNA | X  | 70710916  | 70711017  |          |
| ENSG00000199753 | 3.950976309 | 4.841813558 | snoRNA   | 17 | 62223443  | 62223512  | SNORD104 |
| ENSG00000199787 | 0           | 0.697730409 | snoRNA   | 16 | 30430946  | 30431080  |          |
| ENSG00000199789 | 0.499066092 | 0           | snRNA    | 14 | 99910643  | 99910749  |          |
| ENSG00000199790 | 0.499066092 | 0           | snRNA    | 4  | 41086624  | 41086730  |          |
| ENSG00000199804 | 1.16343121  | 1.667587519 | rRNA     | 14 | 24627812  | 24627931  |          |
| ENSG00000199806 | 0           | 0.390640832 | rRNA     | 21 | 38224211  | 38224328  |          |
| ENSG00000199824 | 0.499066092 | 0           | snRNA    | 12 | 51556684  | 51556790  |          |
| ENSG00000199837 | 0.499066092 | 0           | rRNA     | 1  | 182913500 | 182913625 | RN5S71   |
| ENSG00000199846 | 1.960915222 | 0.950786998 | snRNA    | 7  | 129124345 | 129124497 |          |
| ENSG00000199866 | 0           | 0.697730409 | misc_RNA | 2  | 173422879 | 173422980 |          |
| ENSG00000199872 | 0           | 0.390640832 | snRNA    | 2  | 26265544  | 26265650  |          |
| ENSG00000199874 | 0           | 0.390640832 | rRNA     | 18 | 21750469  | 21750587  |          |
| ENSG00000199879 | 0.869158192 | 0           | snRNA    | 1  | 147735751 | 147735907 |          |
| ENSG00000199890 | 0           | 0.697730409 | misc_RNA | 1  | 111989420 | 111989530 |          |
| ENSG00000199906 | 0           | 0.390640832 | snRNA    | 3  | 40540382  | 40540494  | RNU5B-2P |
| ENSG00000199916 | 5.072559152 | 5.125003832 | misc_RNA | 9  | 35657751  | 35658014  | RMRP     |
| ENSG00000199933 | 1.16343121  | 0.950786998 | misc_RNA | 12 | 102113586 | 102113696 |          |
| ENSG00000199961 | 0.869158192 | 1.518964905 | snoRNA   | 17 | 74557191  | 74557274  | SNORD1B  |
| ENSG00000199975 | 0           | 0.390640832 | misc_RNA | 11 | 73543427  | 73543735  |          |
| ENSG00000199980 | 0           | 0.697730409 | misc_RNA | 14 | 35402650  | 35402749  |          |
| ENSG00000199990 | 0.499066092 | 0           | misc_RNA | 5  | 140090860 | 140090958 | VTRNA1-1 |
| ENSG00000200013 | 0.499066092 | 0           | snRNA    | 17 | 58739694  | 58739798  |          |
| ENSG00000200033 | 0.869158192 | 0.390640832 | snRNA    | 1  | 222010676 | 222010779 |          |
| ENSG00000200051 | 0.499066092 | 0           | snoRNA   | 5  | 139906937 | 139907013 |          |
| ENSG00000200059 | 0.499066092 | 0           | misc_RNA | 16 | 2181852   | 2181951   |          |
| ENSG00000200063 | 0.499066092 | 0.390640832 | snoRNA   | 17 | 76396016  | 76396144  |          |
| ENSG00000200066 | 0           | 0.697730409 | misc_RNA | 12 | 133664099 | 133664201 |          |
| ENSG00000200087 | 6.068837212 | 5.776071827 | snoRNA   | 1  | 28835071  | 28835274  | SNORA73B |
| ENSG00000200090 | 2.57521082  | 2.242360793 | misc_RNA | 11 | 47748446  | 47748544  |          |
| ENSG00000200095 | 0.869158192 | 0           | snRNA    | 15 | 101100891 | 101100997 |          |
| ENSG00000200114 | 0.499066092 | 1.16600992  | rRNA     | 3  | 12552594  | 12552712  | RN5S123  |
| ENSG00000200120 | 0           | 0.390640832 | misc_RNA | 15 | 49429959  | 49430060  |          |
| ENSG00000200127 | 1.407729925 | 0.390640832 | misc_RNA | 17 | 41149933  | 41150024  |          |
| ENSG00000200142 | 0           | 0.390640832 | misc_RNA | 15 | 91520438  | 91520535  |          |
| ENSG00000200152 | 0           | 0.697730409 | snRNA    | 11 | 74679234  | 74679337  |          |
| ENSG00000200164 | 0.499066092 | 0.697730409 | misc_RNA | 16 | 69225026  | 69225126  |          |
| ENSG00000200169 | 1.407729925 | 0.697730409 | snRNA    | 1  | 45196727  | 45196842  | RNU5D-1  |
| ENSG00000200170 | 0.499066092 | 0.697730409 | misc_RNA | 10 | 73980510  | 73980610  |          |
| ENSG00000200179 | 0           | 0.390640832 | misc_RNA | 19 | 36694249  | 36694361  |          |
| ENSG00000200181 | 0.499066092 | 0           | snoRNA   | 1  | 31441011  | 31441083  | SNORD85  |
| ENSG00000200182 | 3.077135474 | 4.342020395 | misc_RNA | 3  | 169482398 | 169482835 | TERC     |
| ENSG00000200225 | 0           | 0.390640832 | rRNA     | 14 | 20883146  | 20883257  |          |
| ENSG00000200237 | 0.499066092 | 0.390640832 | snoRNA   | 19 | 9930630   | 9930770   |          |
| ENSG00000200241 | 0           | 0.697730409 | misc_RNA | 2  | 86387079  | 86387189  |          |
| ENSG00000200242 | 0.869158192 | 0.697730409 | misc_RNA | 11 | 118865270 | 118865365 | RNY4P12  |
| ENSG00000200253 | 0           | 0.390640832 | snRNA    | 10 | 88800995  | 88801098  |          |
| ENSG00000200257 | 0.499066092 | 0           | snRNA    | 17 | 74748994  | 74749097  |          |
| ENSG00000200261 | 0.499066092 | 0           | misc_RNA | 9  | 114931566 | 114931677 |          |
| ENSG00000200274 | 0.499066092 | 0.697730409 | snRNA    | 12 | 110005780 | 110005920 |          |
| ENSG00000200285 | 0           | 0.390640832 | snRNA    | 10 | 12158279  | 12158378  |          |

|                 |             |             |                      |    |           |           |           |
|-----------------|-------------|-------------|----------------------|----|-----------|-----------|-----------|
| ENSG00000200301 | 0.499066092 |             | 0 rRNA               | 20 | 33783109  | 33783226  |           |
| ENSG00000200309 | 0           | 0.390640832 | misc_RNA             | 12 | 49526636  | 49526730  |           |
| ENSG00000200332 | 0           | 0.697730409 | misc_RNA             | 22 | 42044093  | 42044194  |           |
| ENSG00000200344 | 0           | 1.16600992  | misc_RNA             | 1  | 8042941   | 8043043   |           |
| ENSG00000200345 | 0.499066092 |             | 0.390640832 snRNA    | 12 | 7271381   | 7271487   |           |
| ENSG00000200350 | 0.499066092 |             | 0.950786998 snRNA    | 4  | 155465085 | 155465189 |           |
| ENSG00000200354 | 1.616589159 |             | 1.353254395 snoRNA   | 20 | 37062508  | 37062641  | SNORA71D  |
| ENSG00000200376 | 0.499066092 |             | 0.390640832 snRNA    | 11 | 47598023  | 47598140  | RNU5E-10P |
| ENSG00000200394 | 0.499066092 |             | 0 snoRNA             | 17 | 65736785  | 65736915  | SNORA38B  |
| ENSG00000200397 | 0.499066092 |             | 0.390640832 misc_RNA | 7  | 86847927  | 86848028  |           |
| ENSG00000200403 | 0.869158192 |             | 1.353254395 snRNA    | 1  | 19631570  | 19631676  |           |
| ENSG00000200448 | 0.499066092 |             | 0.697730409 misc_RNA | 22 | 43158866  | 43158965  |           |
| ENSG00000200483 | 0           |             | 0.390640832 snRNA    | 12 | 132299808 | 132299913 |           |
| ENSG00000200502 | 1.960915222 |             | 2.039052734 misc_RNA | 9  | 37160134  | 37160234  |           |
| ENSG00000200506 | 0.499066092 |             | 0 misc_RNA           | 14 | 100049354 | 100049455 |           |
| ENSG00000200508 | 0           |             | 0.697730409 misc_RNA | 1  | 64532312  | 64532413  |           |
| ENSG00000200528 | 0.869158192 |             | 0.390640832 snRNA    | 8  | 54827279  | 54827384  |           |
| ENSG00000200530 | 2.847891871 |             | 3.64455972 snoRNA    | 19 | 50000977  | 50001063  | SNORD35B  |
| ENSG00000200534 | 3.077135474 |             | 4.489113623 snoRNA   | 6  | 133138358 | 133138487 | SNORA33   |
| ENSG00000200555 | 0           |             | 0.390640832 snRNA    | 5  | 179871509 | 179871612 |           |
| ENSG00000200560 | 0.869158192 |             | 0 snRNA              | 17 | 61650603  | 61650706  |           |
| ENSG00000200591 | 0           |             | 0.390640832 misc_RNA | 1  | 33105552  | 33105653  |           |
| ENSG00000200594 | 0           |             | 0.390640832 snRNA    | 6  | 155146310 | 155146413 |           |
| ENSG00000200646 | 0.499066092 |             | 0 misc_RNA           | 19 | 56827893  | 56828005  |           |
| ENSG00000200651 | 0           |             | 0.950786998 misc_RNA | 17 | 75438191  | 75438295  |           |
| ENSG00000200652 | 0.499066092 |             | 0 snoRNA             | 16 | 28190419  | 28190544  |           |
| ENSG00000200665 | 0           |             | 0.390640832 snRNA    | 12 | 116520375 | 116520481 |           |
| ENSG00000200677 | 0.499066092 |             | 1.16600992 snoRNA    | 15 | 91298473  | 91298542  |           |
| ENSG00000200685 | 0.499066092 |             | 0 misc_RNA           | 11 | 13708097  | 13708205  |           |
| ENSG00000200688 | 0.499066092 |             | 0 misc_RNA           | 12 | 112506908 | 112507013 |           |
| ENSG00000200693 | 1.407729925 |             | 3.608232228 snoRNA   | 14 | 64118015  | 64118217  |           |
| ENSG00000200714 | 0.499066092 |             | 0.697730409 misc_RNA | 8  | 66504966  | 66505055  |           |
| ENSG00000200732 | 0.499066092 |             | 0.390640832 snRNA    | 6  | 119648446 | 119648550 |           |
| ENSG00000200737 | 0.869158192 |             | 0 misc_RNA           | 10 | 99180952  | 99181064  |           |
| ENSG00000200742 | 1.16343121  |             | 0.390640832 misc_RNA | 14 | 56118252  | 56118352  |           |
| ENSG00000200750 | 0.499066092 |             | 0 misc_RNA           | 18 | 19304080  | 19304190  |           |
| ENSG00000200759 | 0           |             | 0.390640832 snRNA    | 1  | 150995222 | 150995328 |           |
| ENSG00000200769 | 0.499066092 |             | 0.950786998 misc_RNA | 7  | 91831557  | 91831648  |           |
| ENSG00000200783 | 0.499066092 |             | 0 misc_RNA           | 17 | 70659962  | 70660291  |           |
| ENSG00000200788 | 0.869158192 |             | 0.697730409 misc_RNA | 9  | 130233154 | 130233266 |           |
| ENSG00000200792 | 0           |             | 0.390640832 snoRNA   | 21 | 33749496  | 33749631  | SNORA80   |
| ENSG00000200795 | 1.407729925 |             | 0.950786998 snRNA    | 12 | 120730900 | 120731040 | RNU4-1    |
| ENSG00000200814 | 0.499066092 |             | 1.16600992 snRNA     | 12 | 62727872  | 62727978  |           |
| ENSG00000200815 | 0.869158192 |             | 0.697730409 snRNA    | 7  | 50503078  | 50503184  |           |
| ENSG00000200816 | 0.869158192 |             | 0.697730409 snoRNA   | 6  | 31590856  | 31590987  | SNORA38   |
| ENSG00000200837 | 1.16343121  |             | 1.518964905 misc_RNA | 3  | 47542573  | 47542672  |           |
| ENSG00000200843 | 0.499066092 |             | 0.390640832 misc_RNA | 3  | 136307051 | 136307153 | RNY4P4    |
| ENSG00000200847 | 0           |             | 0.390640832 misc_RNA | 7  | 23531411  | 23531512  |           |
| ENSG00000200879 | 2.928422289 |             | 4.363974406 snoRNA   | 11 | 122928785 | 122928869 | SNORD14E  |
| ENSG00000200882 | 0           |             | 0.390640832 snRNA    | 3  | 176843805 | 176843908 |           |
| ENSG00000200906 | 0.499066092 |             | 0 snRNA              | X  | 77092786  | 77092892  |           |
| ENSG00000200913 | 2.238690726 |             | 3.453019579 snoRNA   | 1  | 45242162  | 45242265  | SNORD46   |
| ENSG00000200914 | 0           |             | 0.697730409 rRNA     | 17 | 6504264   | 6504371   |           |
| ENSG00000200917 | 0           |             | 0.390640832 snRNA    | 4  | 106328154 | 106328249 |           |
| ENSG00000200922 | 0           |             | 0.390640832 misc_RNA | 9  | 74517371  | 74517466  |           |
| ENSG00000200924 | 0.869158192 |             | 0.950786998 snRNA    | 2  | 44119829  | 44119935  |           |
| ENSG00000200959 | 2.238690726 |             | 2.334191469 snoRNA   | 5  | 138614470 | 138614667 | SNORA74A  |
| ENSG00000200966 | 0.499066092 |             | 0.390640832 misc_RNA | 9  | 103343361 | 103343661 |           |
| ENSG00000200976 | 0           |             | 0.390640832 misc_RNA | 22 | 30154747  | 30154848  |           |
| ENSG00000200997 | 1.16343121  |             | 0 snRNA              | 17 | 56756888  | 56757051  |           |
| ENSG00000201003 | 0.499066092 |             | 0.697730409 snoRNA   | 1  | 54236691  | 54236826  |           |
| ENSG00000201012 | 0           |             | 0.390640832 misc_RNA | 6  | 135795642 | 135795747 |           |
| ENSG00000201028 | 0           |             | 0.390640832 snRNA    | 1  | 112193053 | 112193159 |           |



|                 |             |             |          |    |           |           |          |
|-----------------|-------------|-------------|----------|----|-----------|-----------|----------|
| ENSG00000201035 | 0.499066092 | 0           | rRNA     | 19 | 21295934  | 21296042  |          |
| ENSG00000201041 | 0           | 0.390640832 | rRNA     | 7  | 128337493 | 128337610 | RN5S242  |
| ENSG00000201044 | 0.499066092 | 0           | snRNA    | 2  | 231616856 | 231616962 |          |
| ENSG00000201085 | 0           | 0.390640832 | snRNA    | 4  | 189042685 | 189042788 |          |
| ENSG00000201109 | 0           | 0.390640832 | rRNA     | 7  | 129667117 | 129667237 | RN5S245  |
| ENSG00000201118 | 0           | 0.390640832 | misc_RNA | 9  | 19089591  | 19089686  |          |
| ENSG00000201121 | 0.499066092 | 0.697730409 | misc_RNA | 3  | 101380904 | 101381008 |          |
| ENSG00000201133 | 0.499066092 | 0           | snoRNA   | 7  | 51003047  | 51003190  |          |
| ENSG00000201134 | 1.960915222 | 0.950786998 | misc_RNA | 1  | 151814212 | 151814313 |          |
| ENSG00000201151 | 0.499066092 | 1.16600992  | snoRNA   | 20 | 33704939  | 33705010  |          |
| ENSG00000201164 | 0           | 0.697730409 | snRNA    | 16 | 68569418  | 68569561  |          |
| ENSG00000201207 | 0           | 0.390640832 | misc_RNA | 6  | 31631065  | 31631178  |          |
| ENSG00000201208 | 0           | 0.697730409 | misc_RNA | 12 | 113616228 | 113616324 |          |
| ENSG00000201209 | 0           | 0.390640832 | snoRNA   | 22 | 28628744  | 28628811  |          |
| ENSG00000201217 | 0.869158192 | 0           | misc_RNA | 3  | 152167061 | 152167173 |          |
| ENSG00000201264 | 0           | 2.144285137 | snoRNA   | 4  | 152023209 | 152023280 |          |
| ENSG00000201298 | 0.499066092 | 0           | snRNA    | 5  | 134036862 | 134036968 |          |
| ENSG00000201302 | 2.847891871 | 3.748356452 | snoRNA   | 9  | 130210780 | 130210909 | SNORA65  |
| ENSG00000201321 | 0.499066092 | 0           | rRNA     | 1  | 228763895 | 228764013 | RN5S9    |
| ENSG00000201358 | 0.869158192 | 0           | misc_RNA | 14 | 50535286  | 50535591  |          |
| ENSG00000201367 | 0.499066092 | 0           | snRNA    | 6  | 15315151  | 15315257  |          |
| ENSG00000201377 | 0.499066092 | 0           | misc_RNA | X  | 69616129  | 69616225  | RNY4P23  |
| ENSG00000201388 | 1.407729925 | 0.390640832 | snoRNA   | 19 | 33099243  | 33099375  |          |
| ENSG00000201390 | 0           | 0.390640832 | snRNA    | 10 | 21950564  | 21950670  |          |
| ENSG00000201448 | 0           | 0.390640832 | snoRNA   | 1  | 36884051  | 36884179  |          |
| ENSG00000201451 | 0.499066092 | 0           | misc_RNA | 9  | 136204565 | 136204661 |          |
| ENSG00000201457 | 2.671945279 | 1.925536307 | snoRNA   | 1  | 40033046  | 40033180  | SNORA55  |
| ENSG00000201458 | 0           | 0.390640832 | snRNA    | 3  | 172514219 | 172514348 | RNU4-4P  |
| ENSG00000201469 | 0           | 0.390640832 | rRNA     | 12 | 133300531 | 133300643 |          |
| ENSG00000201492 | 1.16343121  | 0.950786998 | rRNA     | 1  | 229685652 | 229685769 | RN5S78   |
| ENSG00000201499 | 0.499066092 | 0.697730409 | snRNA    | 2  | 201746438 | 201746544 |          |
| ENSG00000201510 | 0           | 0.390640832 | misc_RNA | 15 | 77028982  | 77029321  |          |
| ENSG00000201512 | 3.652182994 | 3.532712221 | snoRNA   | 20 | 37058313  | 37058446  | SNORA71C |
| ENSG00000201524 | 0           | 0.390640832 | snRNA    | 17 | 57924799  | 57924905  |          |
| ENSG00000201529 | 0           | 0.390640832 | misc_RNA | 14 | 68084019  | 68084132  |          |
| ENSG00000201532 | 0.499066092 | 0           | rRNA     | 5  | 138348018 | 138348130 | RN5S194  |
| ENSG00000201533 | 0           | 0.697730409 | misc_RNA | 4  | 140606281 | 140606581 |          |
| ENSG00000201544 | 0           | 0.390640832 | snoRNA   | 1  | 212526158 | 212526292 | SNORA16B |
| ENSG00000201555 | 1.16343121  | 1.518964905 | misc_RNA | 6  | 31746594  | 31746682  |          |
| ENSG00000201558 | 2.10647801  | 1.667587519 | snRNA    | 1  | 145382757 | 145382920 |          |
| ENSG00000201563 | 0.869158192 | 0           | misc_RNA | 12 | 32858337  | 32858440  |          |
| ENSG00000201564 | 0.499066092 | 0.390640832 | misc_RNA | 11 | 9702471   | 9702785   |          |
| ENSG00000201573 | 0           | 0.390640832 | misc_RNA | 14 | 50935115  | 50935216  |          |
| ENSG00000201579 | 0.499066092 | 0.390640832 | snRNA    | 12 | 56982302  | 56982405  |          |
| ENSG00000201581 | 0.869158192 | 0.950786998 | misc_RNA | 10 | 6191586   | 6191903   |          |
| ENSG00000201586 | 0           | 0.697730409 | snRNA    | 11 | 17137199  | 17137310  |          |
| ENSG00000201592 | 0.499066092 | 0           | snoRNA   | X  | 20154424  | 20154503  |          |
| ENSG00000201595 | 0           | 0.390640832 | rRNA     | 3  | 51728481  | 51728598  | RN5S132  |
| ENSG00000201616 | 0.499066092 | 0.697730409 | snRNA    | 11 | 3069589   | 3069751   |          |
| ENSG00000201619 | 0.499066092 | 0           | snoRNA   | 1  | 179170622 | 179170762 |          |
| ENSG00000201641 | 0.499066092 | 0           | snRNA    | 4  | 78071481  | 78071590  |          |
| ENSG00000201643 | 0.499066092 | 0.950786998 | snoRNA   | 7  | 75573100  | 75573234  | SNORA14A |
| ENSG00000201644 | 0.499066092 | 0.390640832 | misc_RNA | 4  | 76587305  | 76587397  |          |
| ENSG00000201659 | 1.616589159 | 0.390640832 | snRNA    | X  | 46992070  | 46992225  | RNU12-2P |
| ENSG00000201678 | 2.928422289 | 1.16600992  | misc_RNA | 12 | 49321722  | 49321816  |          |
| ENSG00000201684 | 0.499066092 | 1.16600992  | misc_RNA | 11 | 67129885  | 67130179  |          |
| ENSG00000201699 | 1.616589159 | 0.697730409 | snRNA    | 1  | 144534038 | 144534199 |          |
| ENSG00000201724 | 0           | 0.390640832 | misc_RNA | 15 | 100221991 | 100222082 |          |
| ENSG00000201733 | 0           | 0.697730409 | snoRNA   | 11 | 66200234  | 66200373  |          |
| ENSG00000201736 | 0.499066092 | 0           | rRNA     | 4  | 40992171  | 40992290  | RN5S160  |
| ENSG00000201749 | 0.499066092 | 0.390640832 | misc_RNA | 9  | 117377735 | 117377848 |          |
| ENSG00000201761 | 0.499066092 | 0           | snRNA    | 8  | 22291904  | 22292010  |          |
| ENSG00000201770 | 0.869158192 | 0           | snRNA    | 20 | 30168892  | 30168995  |          |

|                 |             |             |          |    |           |           |          |
|-----------------|-------------|-------------|----------|----|-----------|-----------|----------|
| ENSG00000201772 | 2.928422289 | 1.925536307 | snoRNA   | 7  | 45144505  | 45144641  | SNORA5C  |
| ENSG00000201784 | 3.077135474 | 4.508954154 | snoRNA   | 11 | 17096201  | 17096291  | SNORD14A |
| ENSG00000201785 | 1.799000381 | 0.950786998 | snoRNA   | 6  | 31504151  | 31504226  | SNORD117 |
| ENSG00000201793 | 0           | 0.390640832 | misc_RNA | 13 | 99857962  | 99858260  | RN7SKP9  |
| ENSG00000201801 | 0           | 0.390640832 | snRNA    | 1  | 11969865  | 11969984  | RNU5E-4P |
| ENSG00000201806 | 0           | 0.390640832 | snRNA    | 2  | 98281054  | 98281194  | RNU4-8P  |
| ENSG00000201812 | 0           | 0.697730409 | rRNA     | 21 | 15443192  | 15443307  |          |
| ENSG00000201813 | 0           | 0.390640832 | snRNA    | 2  | 196535096 | 196535198 |          |
| ENSG00000201820 | 0           | 0.390640832 | misc_RNA | 14 | 51720651  | 51720741  |          |
| ENSG00000201821 | 0.499066092 | 0           | snRNA    | 13 | 21612668  | 21612806  | RNU4-9P  |
| ENSG00000201823 | 1.616589159 | 1.802319292 | snoRNA   | 6  | 31803040  | 31803103  | SNORD48  |
| ENSG00000201830 | 0.869158192 | 0           | misc_RNA | 9  | 100677972 | 100678078 |          |
| ENSG00000201838 | 2.10647801  | 1.353254395 | snoRNA   | 17 | 74557716  | 74557787  | SNORD1A  |
| ENSG00000201846 | 0           | 0.390640832 | rRNA     | 4  | 149479099 | 149479200 | RN5S166  |
| ENSG00000201850 | 0.499066092 | 0           | misc_RNA | 16 | 68123352  | 68123446  |          |
| ENSG00000201852 | 0.499066092 | 0.390640832 | snRNA    | 18 | 19760073  | 19760179  |          |
| ENSG00000201861 | 0           | 0.390640832 | rRNA     | 10 | 327955    | 328065    |          |
| ENSG00000201876 | 0.499066092 | 0           | rRNA     | 2  | 74195250  | 74195333  | RN5S97   |
| ENSG00000201882 | 1.16343121  | 0.390640832 | snoRNA   | X  | 20154184  | 20154253  |          |
| ENSG00000201900 | 0.499066092 | 0.697730409 | misc_RNA | 1  | 115270341 | 115270445 |          |
| ENSG00000201916 | 0           | 0.950786998 | misc_RNA | 22 | 20835445  | 20835555  |          |
| ENSG00000201944 | 0           | 0.390640832 | snoRNA   | 1  | 205700349 | 205700480 |          |
| ENSG00000201988 | 0.869158192 | 0.697730409 | misc_RNA | 6  | 30704081  | 30704191  |          |
| ENSG00000201998 | 0.869158192 | 1.667587519 | snoRNA   | 11 | 9450320   | 9450501   | SNORA23  |
| ENSG00000202000 | 0.499066092 | 0.390640832 | snRNA    | 4  | 88921389  | 88921553  |          |
| ENSG00000202019 | 0           | 0.390640832 | misc_RNA | 22 | 31626057  | 31626158  |          |
| ENSG00000202030 | 0.499066092 | 0           | misc_RNA | 5  | 135416186 | 135416286 | VTRNA2-1 |
| ENSG00000202031 | 2.10647801  | 2.788380093 | snoRNA   | 1  | 45243515  | 45243584  | SNORD38A |
| ENSG00000202058 | 3.004694206 | 1.667587519 | misc_RNA | 22 | 42961054  | 42961336  |          |
| ENSG00000202059 | 0.499066092 | 0           | snoRNA   | 2  | 203917008 | 203917141 |          |
| ENSG00000202071 | 0.499066092 | 0           | misc_RNA | 3  | 65989514  | 65989615  |          |
| ENSG00000202077 | 2.10647801  | 1.667587519 | snRNA    | 17 | 56736510  | 56736666  |          |
| ENSG00000202078 | 1.16343121  | 0.950786998 | misc_RNA | 1  | 160295894 | 160296006 |          |
| ENSG00000202079 | 0.499066092 | 0.390640832 | misc_RNA | 1  | 247458137 | 247458243 |          |
| ENSG00000202081 | 0           | 0.390640832 | snRNA    | 15 | 86194753  | 86194859  |          |
| ENSG00000202089 | 0           | 0.390640832 | snRNA    | 11 | 63650059  | 63650157  |          |
| ENSG00000202093 | 3.274897671 | 3.845183986 | snoRNA   | 18 | 47015615  | 47015678  | SNORD58C |
| ENSG00000202141 | 0.499066092 | 0           | misc_RNA | 2  | 183887587 | 183887699 |          |
| ENSG00000202150 | 0.499066092 | 0.697730409 | snRNA    | 20 | 33618120  | 33618223  |          |
| ENSG00000202159 | 0           | 0.390640832 | snRNA    | 18 | 55422626  | 55422732  |          |
| ENSG00000202181 | 0.499066092 | 0.390640832 | snRNA    | 3  | 196474063 | 196474195 |          |
| ENSG00000202198 | 3.950976309 | 4.15321211  | misc_RNA | 6  | 52860418  | 52860748  | RN7SK    |
| ENSG00000202220 | 0           | 0.697730409 | misc_RNA | 8  | 74892019  | 74892112  |          |
| ENSG00000202227 | 0           | 0.390640832 | snRNA    | 2  | 48729061  | 48729163  |          |
| ENSG00000202255 | 1.16343121  | 0.697730409 | misc_RNA | 20 | 35296962  | 35297073  |          |
| ENSG00000202259 | 0.869158192 | 0           | snRNA    | 1  | 100466193 | 100466295 |          |
| ENSG00000202268 | 0           | 0.390640832 | snoRNA   | 3  | 45296902  | 45297112  |          |
| ENSG00000202290 | 1.407729925 | 1.16600992  | rRNA     | 13 | 98015226  | 98015355  | RN5S37   |
| ENSG00000202297 | 0.869158192 | 0           | misc_RNA | 10 | 94094220  | 94094321  |          |
| ENSG00000202314 | 1.799000381 | 3.232099092 | snoRNA   | 11 | 93464668  | 93464740  | SNORD6   |
| ENSG00000202318 | 0           | 0.390640832 | misc_RNA | 12 | 6343511   | 6343621   |          |
| ENSG00000202337 | 0.499066092 | 1.518964905 | snRNA    | 14 | 32672369  | 32672475  |          |
| ENSG00000202343 | 0.869158192 | 1.353254395 | snoRNA   | 6  | 149915761 | 149915895 |          |
| ENSG00000202347 | 1.407729925 | 0.390640832 | snRNA    | 13 | 114133230 | 114133393 | RNU1-16P |
| ENSG00000202357 | 0           | 0.390640832 | misc_RNA | 19 | 11519448  | 11519556  |          |
| ENSG00000202358 | 0.499066092 | 0           | snRNA    | 4  | 56751761  | 56751867  |          |
| ENSG00000202361 | 0           | 0.390640832 | misc_RNA | 17 | 59951445  | 59951543  |          |
| ENSG00000202364 | 3.274897671 | 2.721932731 | snoRNA   | 17 | 19091329  | 19091544  | SNORD3A  |
| ENSG00000202379 | 1.16343121  | 1.16600992  | snoRNA   | 3  | 108293412 | 108293545 |          |
| ENSG00000202382 | 0.869158192 | 0.697730409 | misc_RNA | 2  | 85594708  | 85594809  |          |
| ENSG00000202385 | 0           | 0.390640832 | misc_RNA | 1  | 89485929  | 89486048  |          |
| ENSG00000202392 | 0           | 0.697730409 | misc_RNA | 4  | 6998739   | 6999055   |          |
| ENSG00000202400 | 0.499066092 | 0.390640832 | snoRNA   | 2  | 232325082 | 232325151 | SNORD82  |

|                 |             |             |                  |    |           |                     |
|-----------------|-------------|-------------|------------------|----|-----------|---------------------|
| ENSG00000202408 | 0.499066092 | 0.697730409 | snRNA            | 1  | 147806736 | 147806886           |
| ENSG00000202414 | 0           | 0.390640832 | misc_RNA         | 20 | 25195334  | 25195434            |
| ENSG00000202415 | 1.616589159 | 2.039052734 | misc_RNA         | 1  | 10007376  | 10007694            |
| ENSG00000202431 | 0           | 0.697730409 | snRNA            | 7  | 34337108  | 34337210            |
| ENSG00000202434 | 0.499066092 | 0.390640832 | snoRNA           | 2  | 198269442 | 198269578           |
| ENSG00000202441 | 1.799000381 | 1.802319292 | misc_RNA         | 6  | 33167378  | 33167472 RNY4P10    |
| ENSG00000202445 | 0.499066092 | 0           | snRNA            | 9  | 97270020  | 97270126            |
| ENSG00000202461 | 1.16343121  | 0.697730409 | misc_RNA         | 1  | 12084069  | 12084181            |
| ENSG00000202469 | 0           | 0.390640832 | misc_RNA         | X  | 10029262  | 10029363            |
| ENSG00000202470 | 0           | 0.390640832 | misc_RNA         | 12 | 95669546  | 95669648            |
| ENSG00000202474 | 0.499066092 | 0           | rRNA             | 9  | 66458144  | 66458262            |
| ENSG00000202487 | 0           | 0.390640832 | misc_RNA         | 10 | 128609376 | 128609472           |
| ENSG00000202490 | 0           | 0.390640832 | snRNA            | 14 | 64084761  | 64084862            |
| ENSG00000202502 | 0.869158192 | 0.390640832 | rRNA             | 3  | 182976088 | 182976204 RN5S151   |
| ENSG00000202512 | 0           | 0.390640832 | misc_RNA         | 5  | 109035201 | 109035535           |
| ENSG00000202514 | 0           | 0.390640832 | misc_RNA         | 8  | 42804531  | 42804638            |
| ENSG00000202515 | 1.407729925 | 0.950786998 | misc_RNA         | 5  | 140105743 | 140105831 VTRNA1-3  |
| ENSG00000202532 | 4.026095388 | 3.532712221 | snRNA            | 2  | 128602810 | 128602915           |
| ENSG00000202533 | 0           | 1.667587519 | misc_RNA         | 5  | 131803839 | 131803949           |
| ENSG00000202538 | 0.869158192 | 0           | snRNA            | 12 | 120729566 | 120729706 RNU4-2    |
| ENSG00000202566 | 0           | 0.390640832 | miRNA            | X  | 73438212  | 73438296 MIR421     |
| ENSG00000202601 | 0.499066092 | 0           | miRNA            | 5  | 58999432  | 58999529 MIR582     |
| ENSG00000203258 | 0.499066092 | 0.390640832 | antisense        | 11 | 12942733  | 12944472            |
| ENSG00000203276 | 0.499066092 | 1.667587519 | pseudogene       | 1  | 54498816  | 54500553            |
| ENSG00000203279 | 1.616589159 | 1.518964905 | lincRNA          | 9  | 100000046 | 100000960           |
| ENSG00000203280 | 1.960915222 | 1.16600992  | antisense        | 22 | 25498407  | 25508659            |
| ENSG00000203288 | 2.671945279 | 2.788380093 | antisense        | 1  | 151763280 | 151766878           |
| ENSG00000203301 | 2.10647801  | 2.242360793 | protein_coding   | 1  | 2143360   | 2145620             |
| ENSG00000203305 | 2.671945279 | 2.579085888 | pseudogene       | 19 | 56208088  | 56208594            |
| ENSG00000203306 | 5.331395195 | 4.528525526 | pseudogene       | 11 | 124958377 | 124960411           |
| ENSG00000203314 | 0.499066092 | 0           | pseudogene       | 17 | 75099519  | 75099654            |
| ENSG00000203315 | 1.16343121  | 1.353254395 | pseudogene       | 17 | 75087901  | 75088024            |
| ENSG00000203321 | 1.407729925 | 2.039052734 | processed_transc | 9  | 77567884  | 77611209            |
| ENSG00000203325 | 0.499066092 | 0           | antisense        | 1  | 32517892  | 32539075            |
| ENSG00000203326 | 8.150302734 | 7.70765368  | protein_coding   | 19 | 53868946  | 53889846 ZNF525     |
| ENSG00000203327 | 1.407729925 | 2.039052734 | antisense        | 2  | 55441523  | 55443262            |
| ENSG00000203335 | 0           | 0.390640832 | antisense        | 7  | 153721094 | 153758033           |
| ENSG00000203341 | 0           | 0.390640832 | sense_intronic   | 13 | 99970408  | 99971209 UBAC2-IT1  |
| ENSG00000203356 | 0.499066092 | 0.390640832 | processed_transc | 1  | 51660767  | 51700768            |
| ENSG00000203362 | 2.57521082  | 3.027231696 | antisense        | 6  | 43555967  | 43559099            |
| ENSG00000203364 | 0           | 0.950786998 | lincRNA          | 9  | 95909322  | 95910838            |
| ENSG00000203377 | 0.499066092 | 0           | pseudogene       | 8  | 131085393 | 131085648           |
| ENSG00000203392 | 4.437288965 | 3.411459265 | protein_coding   | 15 | 75970672  | 75973093            |
| ENSG00000203396 | 0           | 0.390640832 | pseudogene       | 9  | 107090607 | 107091470           |
| ENSG00000203397 | 0.499066092 | 0           | pseudogene       | X  | 73285918  | 73286427            |
| ENSG00000203400 | 1.16343121  | 0           | pseudogene       | 11 | 64657298  | 64657758            |
| ENSG00000203401 | 2.35979773  | 1.16600992  | pseudogene       | 16 | 67466595  | 67468931            |
| ENSG00000203403 | 1.960915222 | 2.334191469 | pseudogene       | 19 | 35628549  | 35630484            |
| ENSG00000203417 | 1.407729925 | 1.925536307 | lincRNA          | 10 | 131984445 | 131985130           |
| ENSG00000203421 | 0.869158192 | 0           | pseudogene       | 12 | 50711462  | 50711558            |
| ENSG00000203423 | 0           | 0.390640832 | pseudogene       | 12 | 50710006  | 50710100            |
| ENSG00000203424 | 0.499066092 | 0           | pseudogene       | 12 | 50707798  | 50707894            |
| ENSG00000203435 | 0           | 0.697730409 | pseudogene       | 2  | 196858983 | 196860404           |
| ENSG00000203436 | 0.499066092 | 0           | pseudogene       | 4  | 95371802  | 95372043            |
| ENSG00000203437 | 0.869158192 | 0.697730409 | pseudogene       | 12 | 31617996  | 31618776            |
| ENSG00000203438 | 0.499066092 | 0           | pseudogene       | 9  | 66473375  | 66473673            |
| ENSG00000203441 | 2.10647801  | 1.353254395 | antisense        | 13 | 100151981 | 100153306 LINC00449 |
| ENSG00000203446 | 0.869158192 | 1.667587519 | antisense        | 7  | 40577726  | 40586527            |
| ENSG00000203457 | 0           | 0.390640832 | pseudogene       | 10 | 126493333 | 126493557           |
| ENSG00000203472 | 3.004694206 | 1.353254395 | processed_transc | 16 | 75509794  | 75529305            |
| ENSG00000203482 | 0.499066092 | 0.390640832 | pseudogene       | 17 | 26547062  | 26547215            |
| ENSG00000203485 | 11.87618012 | 10.2986563  | protein_coding   | 14 | 105155943 | 105185942 INF2      |
| ENSG00000203497 | 3.077135474 | 3.993387124 | antisense        | 10 | 112629626 | 112631991           |

|                 |             |             |                  |    |           |                     |
|-----------------|-------------|-------------|------------------|----|-----------|---------------------|
| ENSG00000203499 | 6.604346021 | 4.342020395 | processed_transc | 8  | 144816310 | 144828507           |
| ENSG00000203504 | 0.499066092 | 0.390640832 | pseudogene       | 11 | 31705636  | 31707478            |
| ENSG00000203506 | 0.499066092 | 0.697730409 | antisense        | 3  | 29657466  | 29684300 RBMS3-AS2  |
| ENSG00000203512 | 0           | 0.390640832 | pseudogene       | 9  | 34195642  | 34195883            |
| ENSG00000203513 | 0.499066092 | 0           | pseudogene       | 9  | 34169687  | 34169934            |
| ENSG00000203542 | 0           | 0.390640832 | pseudogene       | 9  | 32548215  | 32548487            |
| ENSG00000203546 | 0.869158192 | 2.579085888 | protein_coding   | 14 | 31803518  | 31926647            |
| ENSG00000203562 | 0.499066092 | 1.16600992  | pseudogene       | 17 | 4890302   | 4890972             |
| ENSG00000203563 | 1.16343121  | 1.518964905 | pseudogene       | 5  | 21493692  | 21494062            |
| ENSG00000203564 | 3.004694206 | 2.971122874 | antisense        | 9  | 114680537 | 114681204           |
| ENSG00000203581 | 1.616589159 | 1.16600992  | pseudogene       | 16 | 3265562   | 3266546 OR1F2P      |
| ENSG00000203588 | 0.499066092 | 0.697730409 | antisense        | X  | 69383692  | 69385056 IGBP1-AS1  |
| ENSG00000203589 | 0           | 1.518964905 | pseudogene       | 1  | 24032291  | 24033424            |
| ENSG00000203593 | 0           | 0.697730409 | antisense        | 12 | 2113832   | 2120558             |
| ENSG00000203602 | 1.16343121  | 0.390640832 | pseudogene       | 13 | 28008286  | 28008752            |
| ENSG00000203606 | 1.960915222 | 1.353254395 | pseudogene       | 22 | 30831531  | 30832231            |
| ENSG00000203614 | 0.499066092 | 0.697730409 | pseudogene       | 13 | 21286570  | 21288285            |
| ENSG00000203615 | 0.499066092 | 0           | pseudogene       | 4  | 56277189  | 56277313            |
| ENSG00000203616 | 0.499066092 | 0           | pseudogene       | 21 | 15309314  | 15309646 RHOT1P2    |
| ENSG00000203618 | 1.16343121  | 0           | protein_coding   | 22 | 19710468  | 19712294 GP1BB      |
| ENSG00000203630 | 2.35979773  | 2.721932731 | protein_coding   | 20 | 1316228   | 1317555             |
| ENSG00000203632 | 1.16343121  | 1.802319292 | pseudogene       | 3  | 186650337 | 186652182           |
| ENSG00000203635 | 0.869158192 | 0           | lincRNA          | 2  | 1624282   | 1629191             |
| ENSG00000203643 | 0.499066092 | 0           | antisense        | 2  | 11861745  | 11864348            |
| ENSG00000203644 | 5.995967334 | 5.717592784 | pseudogene       | 3  | 129565893 | 129566800           |
| ENSG00000203645 | 0.499066092 | 0           | lincRNA          | 3  | 177012230 | 177041206 LINC00501 |
| ENSG00000203647 | 0           | 0.390640832 | pseudogene       | 3  | 65994445  | 65994875            |
| ENSG00000203650 | 0.869158192 | 2.334191469 | processed_transc | X  | 117973519 | 117991849           |
| ENSG00000203652 | 0           | 0.390640832 | pseudogene       | 3  | 30030355  | 30031951            |
| ENSG00000203666 | 5.958104008 | 6.712401119 | protein_coding   | 1  | 245133007 | 245290466 EFCAB2    |
| ENSG00000203667 | 4.062237333 | 4.622587519 | protein_coding   | 1  | 244998624 | 245008359 FAM36A    |
| ENSG00000203668 | 8.271030151 | 8.713847451 | protein_coding   | 1  | 241792155 | 241799232 CHML      |
| ENSG00000203684 | 1.960915222 | 2.242360793 | protein_coding   | 1  | 228351787 | 228353213 C1orf148  |
| ENSG00000203685 | 0.499066092 | 0           | protein_coding   | 1  | 226736501 | 226796915 C1orf95   |
| ENSG00000203688 | 0.869158192 | 0.950786998 | lincRNA          | 6  | 168080306 | 168084467           |
| ENSG00000203691 | 2.35979773  | 2.912743273 | protein_coding   | 1  | 225600404 | 225602040           |
| ENSG00000203697 | 1.616589159 | 1.16600992  | protein_coding   | 1  | 223711349 | 223853436 CAPN8     |
| ENSG00000203705 | 6.984620223 | 7.240325909 | protein_coding   | 1  | 212965170 | 212989968 TATDN3    |
| ENSG00000203706 | 4.491309013 | 5.361622823 | protein_coding   | 1  | 210404801 | 210407392 C1orf133  |
| ENSG00000203709 | 1.960915222 | 2.242360793 | protein_coding   | 1  | 207986905 | 208042495 C1orf132  |
| ENSG00000203711 | 2.847891871 | 2.420525079 | protein_coding   | 6  | 159290954 | 159331385 C6orf99   |
| ENSG00000203721 | 1.616589159 | 1.353254395 | protein_coding   | 1  | 200311672 | 200343482 C1orf98   |
| ENSG00000203722 | 2.762599152 | 2.039052734 | protein_coding   | 6  | 150238014 | 150244257 RAET1G    |
| ENSG00000203724 | 2.762599152 | 4.448594745 | protein_coding   | 1  | 197871777 | 197876497 C1orf53   |
| ENSG00000203727 | 1.407729925 | 0.697730409 | protein_coding   | 6  | 147830063 | 148058683 SAMD5     |
| ENSG00000203730 | 0           | 0.390640832 | protein_coding   | 1  | 182367252 | 182369751 TEDDM1    |
| ENSG00000203734 | 0.499066092 | 1.16600992  | protein_coding   | 6  | 139117063 | 139225207 ECT2L     |
| ENSG00000203737 | 1.407729925 | 1.667587519 | protein_coding   | 1  | 174417212 | 174418683 GPR52     |
| ENSG00000203739 | 2.35979773  | 2.971122874 | antisense        | 1  | 173386932 | 173430501           |
| ENSG00000203760 | 7.289098491 | 7.858322159 | protein_coding   | 6  | 126661320 | 126670021 CENPW     |
| ENSG00000203761 | 3.146112541 | 4.127774132 | pseudogene       | 1  | 155581011 | 155720105           |
| ENSG00000203772 | 4.821592551 | 5.200150955 | protein_coding   | 10 | 135234170 | 135382916 SPRN      |
| ENSG00000203778 | 5.879259127 | 6.97385478  | protein_coding   | 6  | 112408802 | 112423993 C6orf225  |
| ENSG00000203780 | 4.352265886 | 4.566889334 | protein_coding   | 10 | 127585108 | 127698161 FANK1     |
| ENSG00000203791 | 5.948480845 | 6.668971382 | protein_coding   | 10 | 126436721 | 126480446 METTL10   |
| ENSG00000203797 | 3.78787645  | 5.112089758 | protein_coding   | 6  | 110712974 | 110740732 DDO       |
| ENSG00000203799 | 5.525114348 | 5.372493443 | pseudogene       | 6  | 109612231 | 109676266 CCDC162P  |
| ENSG00000203801 | 1.16343121  | 1.16600992  | lincRNA          | 6  | 109072857 | 109091145 LINC00222 |
| ENSG00000203804 | 2.762599152 | 3.133298822 | protein_coding   | 1  | 150533480 | 150533969 C1orf138  |
| ENSG00000203805 | 0           | 0.950786998 | protein_coding   | 10 | 122216466 | 122349367 PPAPDC1A  |
| ENSG00000203808 | 0.499066092 | 0           | protein_coding   | 6  | 105585562 | 105617820 C6orf112  |
| ENSG00000203813 | 3.830412367 | 4.468996429 | protein_coding   | 6  | 27777842  | 27778314 HIST1H3H   |
| ENSG00000203814 | 5.207774174 | 4.841813558 | protein_coding   | 1  | 149754245 | 149783928 HIST2H2BF |

|                 |             |             |                  |    |           |                       |
|-----------------|-------------|-------------|------------------|----|-----------|-----------------------|
| ENSG00000203815 | 5.660945913 | 5.832272499 | protein_coding   | 1  | 149675978 | 149676609             |
| ENSG00000203817 | 3.004694206 | 2.851901313 | protein_coding   | 1  | 149438750 | 149459549 FAM72C      |
| ENSG00000203818 | 2.762599152 | 2.788380093 | protein_coding   | 1  | 149398877 | 149400542 HIST2H3PS2  |
| ENSG00000203832 | 6.032862302 | 6.490875274 | protein_coding   | 1  | 148250249 | 148347506 NBPF20      |
| ENSG00000203836 | 2.928422289 | 3.232099092 | protein_coding   | 1  | 147574428 | 147624601 NBPF24      |
| ENSG00000203837 | 0.499066092 | 0.950786998 | protein_coding   | 10 | 118187379 | 118237469 PNLIIPRP3   |
| ENSG00000203843 | 0.499066092 | 0.697730409 | pseudogene       | 1  | 144612266 | 144612683 PFN1P2      |
| ENSG00000203849 | 2.671945279 | 3.32456471  | processed_transc | 1  | 142620645 | 142714605             |
| ENSG00000203855 | 0.869158192 | 1.353254395 | pseudogene       | 1  | 120106689 | 120114734 HSD3BP4     |
| ENSG00000203865 | 3.211941663 | 3.781359661 | protein_coding   | 1  | 116941622 | 116961197 ATP1A10S    |
| ENSG00000203871 | 1.16343121  | 2.501982735 | protein_coding   | 6  | 88106840  | 88109467 C6orf164     |
| ENSG00000203872 | 1.616589159 | 3.133298822 | protein_coding   | 6  | 88054571  | 88075181 C6orf163     |
| ENSG00000203875 | 10.24362336 | 10.78609522 | processed_transc | 6  | 86386725  | 86388451 SNHG5        |
| ENSG00000203876 | 0.499066092 | 0           | protein_coding   | 10 | 111701029 | 111713649             |
| ENSG00000203879 | 10.57794882 | 10.52439235 | protein_coding   | X  | 153665266 | 153671814 GDI1        |
| ENSG00000203880 | 9.016909338 | 9.263397979 | protein_coding   | 20 | 62887048  | 62926855 PCMTD2       |
| ENSG00000203883 | 2.10647801  | 1.925536307 | protein_coding   | 20 | 62679076  | 62680994 SOX18        |
| ENSG00000203886 | 0           | 0.390640832 | antisense        | 10 | 104592478 | 104594273 CYP17A1-AS1 |
| ENSG00000203896 | 1.616589159 | 1.518964905 | protein_coding   | 20 | 62366815  | 62370456 LIME1        |
| ENSG00000203897 | 0.499066092 | 0.697730409 | antisense        | 1  | 109399839 | 109401146             |
| ENSG00000203907 | 0           | 0.950786998 | protein_coding   | 6  | 74078278  | 74104856 OOEPE        |
| ENSG00000203914 | 0.869158192 | 1.802319292 | pseudogene       | 1  | 92100568  | 92109633 HSP90B3P     |
| ENSG00000203930 | 0.869158192 | 1.353254395 | protein_coding   | X  | 139791932 | 139854839             |
| ENSG00000203942 | 0           | 0.950786998 | protein_coding   | 10 | 99349450  | 99350690 C10orf62     |
| ENSG00000203943 | 2.10647801  | 2.334191469 | protein_coding   | 1  | 84764049  | 84855640 SAMD13       |
| ENSG00000203945 | 1.407729925 | 1.16600992  | protein_coding   | X  | 135056007 | 135057190             |
| ENSG00000203950 | 8.98077946  | 9.224178134 | protein_coding   | X  | 134184962 | 134186226 FAM127B     |
| ENSG00000203951 | 0.499066092 | 0.390640832 | protein_coding   | 20 | 60806978  | 60811355              |
| ENSG00000203952 | 0.499066092 | 0           | protein_coding   | X  | 133371077 | 133380237 CCDC160     |
| ENSG00000203965 | 5.191549282 | 5.683080141 | protein_coding   | 1  | 63989043  | 64038364 EFCAB7       |
| ENSG00000203987 | 0.499066092 | 0           | protein_coding   | 9  | 140762377 | 140787022             |
| ENSG00000203993 | 7.115078652 | 7.298481685 | protein_coding   | 9  | 140509784 | 140513358 C9orf37     |
| ENSG00000203995 | 7.144876945 | 7.357122767 | protein_coding   | 1  | 53308183  | 53360670 ZYG11A       |
| ENSG00000203999 | 4.381167248 | 3.64455972  | processed_transc | 20 | 48909257  | 48931459              |
| ENSG00000204003 | 0.499066092 | 0           | protein_coding   | 9  | 139632619 | 139642980 LCN6        |
| ENSG00000204010 | 0           | 0.390640832 | protein_coding   | 10 | 91137813  | 91144962 IFIT1B       |
| ENSG00000204011 | 2.847891871 | 2.039052734 | protein_coding   | 9  | 137541273 | 137544656 C9orf104    |
| ENSG00000204018 | 3.989024711 | 3.96493948  | protein_coding   | 1  | 48231308  | 48462567              |
| ENSG00000204019 | 6.462804234 | 7.423961341 | protein_coding   | X  | 115592849 | 115594164 CXorf61     |
| ENSG00000204022 | 0           | 0.697730409 | protein_coding   | 10 | 90346510  | 90366733 LIPJ         |
| ENSG00000204044 | 2.928422289 | 2.721932731 | antisense        | 20 | 44642141  | 44650712              |
| ENSG00000204049 | 0.499066092 | 1.353254395 | protein_coding   | 10 | 79626633  | 79629368              |
| ENSG00000204052 | 3.211941663 | 3.453019579 | protein_coding   | 6  | 43474707  | 43478424 LRRC73       |
| ENSG00000204054 | 8.162840364 | 8.273738696 | processed_transc | 9  | 132245730 | 132275947             |
| ENSG00000204055 | 2.57521082  | 2.652276565 | antisense        | 9  | 131939050 | 131972827             |
| ENSG00000204060 | 4.131913373 | 4.17820932  | protein_coding   | 1  | 41827594  | 41849262 FOXO6        |
| ENSG00000204070 | 8.771587845 | 8.76011133  | protein_coding   | 20 | 43990577  | 44005438 SYS1         |
| ENSG00000204071 | 0           | 0.390640832 | protein_coding   | X  | 101395448 | 101397942 TCEAL6      |
| ENSG00000204084 | 7.08025234  | 6.99159092  | protein_coding   | 1  | 38326369  | 38412729 INPP5B       |
| ENSG00000204086 | 1.616589159 | 1.353254395 | protein_coding   | X  | 96138907  | 96140446 RPA4         |
| ENSG00000204091 | 0           | 0.390640832 | antisense        | 6  | 40302693  | 40347624 TDRG1        |
| ENSG00000204092 | 0           | 0.390640832 | lincRNA          | 6  | 40312083  | 40313890              |
| ENSG00000204099 | 3.077135474 | 3.183544561 | protein_coding   | 2  | 242749920 | 242758739 NEU4        |
| ENSG00000204104 | 7.962273293 | 7.648510984 | protein_coding   | 2  | 239229082 | 239309541 TRAF3IP1    |
| ENSG00000204113 | 0.869158192 | 0.697730409 | pseudogene       | X  | 73405764  | 73406990 BMP2KL       |
| ENSG00000204116 | 5.869093502 | 6.16171561  | protein_coding   | X  | 72783044  | 72906608 CHIC1        |
| ENSG00000204118 | 0           | 0.390640832 | protein_coding   | X  | 72345876  | 72347919 NAP1L6       |
| ENSG00000204120 | 9.887911038 | 9.538401832 | protein_coding   | 2  | 233562009 | 233725285 GIGYF2      |
| ENSG00000204128 | 0           | 0.697730409 | protein_coding   | 2  | 231902205 | 231914434 C2orf72     |
| ENSG00000204130 | 7.348842929 | 7.436965343 | protein_coding   | 10 | 70100864  | 70167051 RUFY2        |
| ENSG00000204131 | 1.616589159 | 1.353254395 | protein_coding   | X  | 71130938  | 71363424 NHSL2        |
| ENSG00000204136 | 2.762599152 | 2.579085888 | pseudogene       | 9  | 124207269 | 124262306 GGTA1P      |
| ENSG00000204138 | 9.533752964 | 9.537798375 | protein_coding   | 1  | 28696114  | 28826881 PHACTR4      |

|                 |             |             |                  |    |           |           |           |
|-----------------|-------------|-------------|------------------|----|-----------|-----------|-----------|
| ENSG00000204147 | 4.322773689 | 3.64455972  | protein_coding   | 10 | 52499078  | 52576255  | ASAH2B    |
| ENSG00000204149 | 6.17992145  | 6.044260771 | protein_coding   | 10 | 51748078  | 51770259  | AGAP6     |
| ENSG00000204150 | 1.16343121  | 0.697730409 | pseudogene       | 10 | 47708307  | 47730235  | CTGLF11P  |
| ENSG00000204152 | 1.799000381 | 0.697730409 | protein_coding   | 10 | 51371390  | 51732941  | TIMM23B   |
| ENSG00000204160 | 8.13977083  | 7.992972811 | protein_coding   | 1  | 27153201  | 27183391  | ZDHC18    |
| ENSG00000204164 | 2.57521082  | 1.802319292 | processed_transc | 10 | 48901102  | 48950972  |           |
| ENSG00000204165 | 0.499066092 | 0           | protein_coding   | X  | 70323837  | 70326561  | CXorf65   |
| ENSG00000204172 | 6.782811835 | 6.223059835 | protein_coding   | 10 | 47191844  | 47239738  | AGAP10    |
| ENSG00000204173 | 0           | 1.667587519 | protein_coding   | 9  | 114365111 | 114393569 | C9orf29   |
| ENSG00000204174 | 3.335220907 | 2.144285137 | protein_coding   | 10 | 47083534  | 47088320  | PPYR1     |
| ENSG00000204175 | 4.712111592 | 0.697730409 | protein_coding   | 10 | 46994087  | 47005643  | GPRIN2    |
| ENSG00000204176 | 6.793601635 | 5.938503778 | protein_coding   | 10 | 46952762  | 46971400  | SYT15     |
| ENSG00000204177 | 7.222786417 | 6.885547525 | pseudogene       | 10 | 46737612  | 46762776  | BMS1P1    |
| ENSG00000204178 | 7.813830732 | 7.887034762 | protein_coding   | 1  | 25757388  | 25826700  | TMEM57    |
| ENSG00000204186 | 6.749949642 | 6.628734426 | protein_coding   | 2  | 207139387 | 207179148 | ZDBF2     |
| ENSG00000204188 | 0.869158192 | 0.697730409 | protein_coding   | 6  | 33551515  | 33556803  | GGNBP1    |
| ENSG00000204195 | 1.16343121  | 0           | protein_coding   | X  | 69454505  | 69460477  | AWAT1     |
| ENSG00000204209 | 9.820929282 | 10.21770649 | protein_coding   | 6  | 33286335  | 33297046  | DAXX      |
| ENSG00000204217 | 9.382055486 | 9.18231859  | protein_coding   | 2  | 203241659 | 203432474 | BMPR2     |
| ENSG00000204219 | 4.800350936 | 3.081239798 | protein_coding   | 1  | 23707554  | 23751233  | TCEA3     |
| ENSG00000204220 | 8.441937187 | 8.581912372 | protein_coding   | 6  | 33257079  | 33266178  | PFDN6     |
| ENSG00000204227 | 9.135091581 | 9.375714884 | protein_coding   | 6  | 33176272  | 33180499  | RING1     |
| ENSG00000204228 | 5.929039784 | 6.130036786 | protein_coding   | 6  | 33172419  | 33174608  | HSD17B8   |
| ENSG00000204231 | 9.099664364 | 9.636359306 | protein_coding   | 6  | 33161365  | 33168630  | RXR8      |
| ENSG00000204237 | 6.727618145 | 7.182818183 | protein_coding   | 17 | 79632067  | 79633618  | C17orf90  |
| ENSG00000204241 | 0.869158192 | 1.16600992  | processed_transc | 11 | 133902167 | 133916744 |           |
| ENSG00000204248 | 6.050961887 | 7.077141316 | protein_coding   | 6  | 33130458  | 33160276  | COL11A2   |
| ENSG00000204253 | 2.10647801  | 1.802319292 | pseudogene       | 2  | 190788062 | 190788942 |           |
| ENSG00000204256 | 11.54132321 | 11.33745188 | protein_coding   | 6  | 32936437  | 32949282  | BRD2      |
| ENSG00000204257 | 6.798966424 | 6.703819132 | protein_coding   | 6  | 32916390  | 32938493  | HLA-DMA   |
| ENSG00000204261 | 4.568725997 | 5.536128679 | processed_transc | 6  | 32811863  | 32814272  |           |
| ENSG00000204262 | 5.649112675 | 5.931169853 | protein_coding   | 2  | 189896622 | 190044605 | COL5A2    |
| ENSG00000204264 | 9.572641559 | 10.27893096 | protein_coding   | 6  | 32808494  | 32812480  | PSMB8     |
| ENSG00000204267 | 9.201414078 | 9.493672366 | protein_coding   | 6  | 32781544  | 32806599  | TAP2      |
| ENSG00000204271 | 5.239686603 | 5.545764946 | protein_coding   | X  | 57002815  | 57021988  | SPIN3     |
| ENSG00000204272 | 8.096857104 | 8.299598884 | processed_transc | X  | 56755692  | 56844813  |           |
| ENSG00000204282 | 2.928422289 | 0           | protein_coding   | 17 | 76103480  | 76106416  |           |
| ENSG00000204287 | 2.471521042 | 0.697730409 | protein_coding   | 6  | 32407619  | 32412823  | HLA-DRA   |
| ENSG00000204290 | 0.499066092 | 0.390640832 | protein_coding   | 6  | 32359241  | 32379511  | BTNL2     |
| ENSG00000204291 | 4.863159938 | 5.32851069  | protein_coding   | 9  | 101705461 | 101833069 | COL15A1   |
| ENSG00000204296 | 0           | 0.390640832 | protein_coding   | 6  | 32256303  | 32352332  | C6orf10   |
| ENSG00000204301 | 2.471521042 | 3.027231696 | protein_coding   | 6  | 32162620  | 32191844  | NOTCH4    |
| ENSG00000204304 | 8.839544001 | 9.021555505 | protein_coding   | 6  | 32151966  | 32157963  | PBX2      |
| ENSG00000204305 | 5.207774174 | 5.32851069  | protein_coding   | 6  | 32148745  | 32152101  | AGER      |
| ENSG00000204308 | 8.05038018  | 8.495050596 | protein_coding   | 6  | 32146131  | 32151930  | RNF5      |
| ENSG00000204310 | 9.225519491 | 9.316433258 | protein_coding   | 6  | 32135989  | 32145873  | AGPAT1    |
| ENSG00000204311 | 3.146112541 | 3.32456471  | protein_coding   | 2  | 179316163 | 179326117 | DFNB59    |
| ENSG00000204314 | 5.485736881 | 5.683080141 | protein_coding   | 6  | 32116136  | 32122150  | PRRT1     |
| ENSG00000204315 | 6.313367288 | 6.948652068 | protein_coding   | 6  | 32096484  | 32098068  | FKBPL     |
| ENSG00000204316 | 9.57498878  | 9.919526433 | protein_coding   | 17 | 73894724  | 73905899  | MRPL38    |
| ENSG00000204323 | 2.762599152 | 3.493416095 | protein_coding   | 17 | 73629514  | 73637484  | C17orf109 |
| ENSG00000204334 | 2.238690726 | 3.081239798 | protein_coding   | 2  | 171640296 | 171655481 |           |
| ENSG00000204335 | 4.75690578  | 5.072639111 | protein_coding   | 2  | 171571861 | 171574588 | SP5       |
| ENSG00000204338 | 1.16343121  | 2.144285137 | pseudogene       | 6  | 31973413  | 31976228  | CYP21A1P  |
| ENSG00000204343 | 1.16343121  | 0.390640832 | protein_coding   | 9  | 97418353  | 97480105  | C9orf118  |
| ENSG00000204344 | 6.204385613 | 6.460630645 | protein_coding   | 6  | 31938868  | 31949228  | STK19     |
| ENSG00000204345 | 0           | 0.390640832 | protein_coding   | 17 | 72575504  | 72588422  | CD300LD   |
| ENSG00000204347 | 0           | 0.697730409 | protein_coding   | 17 | 72352555  | 72357958  | BTBD17    |
| ENSG00000204348 | 7.72925009  | 8.220584723 | protein_coding   | 6  | 31937587  | 31940069  | DOM3Z     |
| ENSG00000204351 | 10.61795765 | 10.81726149 | protein_coding   | 6  | 31926857  | 31937532  | SKIV2L    |
| ENSG00000204356 | 9.511051014 | 9.905561226 | protein_coding   | 6  | 31919864  | 31926887  | RDBP      |
| ENSG00000204361 | 0.499066092 | 1.802319292 | protein_coding   | 11 | 114549108 | 114579362 | FAM55B    |
| ENSG00000204362 | 0.869158192 | 2.242360793 | lincRNA          | 1  | 17516278  | 17524112  |           |

|                 |             |             |                |    |           |           |           |
|-----------------|-------------|-------------|----------------|----|-----------|-----------|-----------|
| ENSG00000204365 | 0           | 1.16600992  | protein_coding | 10 | 29135337  | 29170827  | C10orf126 |
| ENSG00000204366 | 6.825495146 | 6.559073862 | protein_coding | 6  | 31867384  | 31869769  | ZBTB12    |
| ENSG00000204370 | 8.727254249 | 8.595894166 | protein_coding | 11 | 111957497 | 111990353 | SDHD      |
| ENSG00000204371 | 9.892309656 | 9.857042169 | protein_coding | 6  | 31847536  | 31865464  | EHMT2     |
| ENSG00000204375 | 1.616589159 | 1.802319292 | protein_coding | X  | 52541053  | 52546197  | XAGE1E    |
| ENSG00000204377 | 1.960915222 | 1.925536307 | protein_coding | 1  | 16555170  | 16556094  | C1orf134  |
| ENSG00000204379 | 1.407729925 | 1.667587519 | protein_coding | X  | 52255219  | 52260363  | XAGE1A    |
| ENSG00000204380 | 1.960915222 | 2.242360793 | antisense      | 2  | 159514849 | 159591514 |           |
| ENSG00000204382 | 0.499066092 | 2.501982735 | protein_coding | X  | 52235228  | 52243954  | XAGE1B    |
| ENSG00000204385 | 0           | 1.16600992  | protein_coding | 6  | 31830969  | 31846823  | SLC44A4   |
| ENSG00000204386 | 9.225519491 | 10.18339326 | protein_coding | 6  | 31825436  | 31830683  | NEU1      |
| ENSG00000204387 | 9.829474056 | 10.41855964 | protein_coding | 6  | 31802385  | 31807541  | C6orf48   |
| ENSG00000204388 | 9.275444054 | 9.254610923 | protein_coding | 6  | 31795512  | 31798031  | HSPA1B    |
| ENSG00000204389 | 8.959377969 | 8.997179425 | protein_coding | 6  | 31783291  | 31785723  | HSPA1A    |
| ENSG00000204390 | 3.211941663 | 4.342020395 | protein_coding | 6  | 31777396  | 31783437  | HSPA1L    |
| ENSG00000204392 | 8.637276046 | 9.074940905 | protein_coding | 6  | 31765173  | 31774761  | LSM2      |
| ENSG00000204394 | 12.4757972  | 12.4054171  | protein_coding | 6  | 31745295  | 31763730  | VARS      |
| ENSG00000204396 | 4.165528823 | 3.133298822 | protein_coding | 6  | 31733367  | 31745108  | VWA7      |
| ENSG00000204397 | 4.543379137 | 5.536128679 | protein_coding | 11 | 104912053 | 104972158 | CARD16    |
| ENSG00000204406 | 7.049074049 | 6.827478203 | protein_coding | 2  | 148778580 | 149275805 | MBD5      |
| ENSG00000204410 | 6.372135143 | 6.174194902 | protein_coding | 6  | 31707725  | 31732622  | MSH5      |
| ENSG00000204420 | 1.16343121  | 0           | protein_coding | 6  | 31686371  | 31694491  | C6orf25   |
| ENSG00000204421 | 0.499066092 | 0.697730409 | protein_coding | 6  | 31686425  | 31689622  | LY6G6C    |
| ENSG00000204427 | 4.517578978 | 4.903073497 | protein_coding | 6  | 31654726  | 31671221  | ABHD16A   |
| ENSG00000204428 | 2.762599152 | 3.781359661 | protein_coding | 6  | 31644461  | 31651817  | LY6G5C    |
| ENSG00000204434 | 0.869158192 | 1.16600992  | pseudogene     | 2  | 132349325 | 132384839 | POTEKP    |
| ENSG00000204435 | 9.946492051 | 10.36785414 | protein_coding | 6  | 31633013  | 31641323  | CSNK2B    |
| ENSG00000204438 | 7.381392865 | 8.055017786 | protein_coding | 6  | 31629006  | 31634060  | GPANK1    |
| ENSG00000204439 | 7.695130106 | 8.070120888 | protein_coding | 6  | 31626075  | 31628549  | C6orf47   |
| ENSG00000204444 | 3.871730003 | 3.279072565 | protein_coding | 6  | 31620193  | 31625987  | APOM      |
| ENSG00000204463 | 11.85170516 | 11.88582185 | protein_coding | 6  | 31606805  | 31620482  | BAG6      |
| ENSG00000204464 | 0           | 0.697730409 | protein_coding | 1  | 15490840  | 15497813  | C1orf195  |
| ENSG00000204469 | 12.94188174 | 12.59638432 | protein_coding | 6  | 31588450  | 31605548  | PRRC2A    |
| ENSG00000204472 | 0.869158192 | 0           | protein_coding | 6  | 31582961  | 31584798  | AIF1      |
| ENSG00000204475 | 0           | 0.390640832 | protein_coding | 6  | 31556672  | 31560762  | NCR3      |
| ENSG00000204482 | 4.568725997 | 4.319727133 | protein_coding | 6  | 31553901  | 31556686  | LST1      |
| ENSG00000204498 | 7.182306324 | 7.718344862 | protein_coding | 6  | 31514647  | 31527677  | NFKBIL1   |
| ENSG00000204511 | 0           | 1.353254395 | protein_coding | 6  | 31496494  | 31498009  | MCCD1     |
| ENSG00000204514 | 8.169068555 | 7.984140487 | protein_coding | 19 | 58380747  | 58400442  | ZNF814    |
| ENSG00000204516 | 8.579219424 | 8.17939326  | protein_coding | 6  | 31462658  | 31478901  | MICB      |
| ENSG00000204519 | 5.018397273 | 5.059245468 | protein_coding | 19 | 58193357  | 58201167  | ZNF551    |
| ENSG00000204520 | 8.112022537 | 8.292461872 | protein_coding | 6  | 31367561  | 31384016  | MICA      |
| ENSG00000204524 | 8.120617457 | 7.896480033 | protein_coding | 19 | 57751973  | 57774106  | ZNF805    |
| ENSG00000204525 | 11.33430035 | 12.4738155  | protein_coding | 6  | 31236526  | 31239907  | HLA-C     |
| ENSG00000204531 | 1.799000381 | 1.667587519 | protein_coding | 6  | 31130253  | 31148508  | POU5F1    |
| ENSG00000204532 | 0.499066092 | 0.390640832 | protein_coding | 19 | 56713670  | 56720821  | ZSCAN5C   |
| ENSG00000204533 | 3.652182994 | 3.493416095 | protein_coding | 19 | 56662314  | 56663250  |           |
| ENSG00000204536 | 8.614637248 | 8.899098923 | protein_coding | 6  | 31110216  | 31126015  | CCHCR1    |
| ENSG00000204538 | 1.616589159 | 2.652276565 | protein_coding | 6  | 31105313  | 31107127  | PSORS1C2  |
| ENSG00000204539 | 0           | 1.16600992  | protein_coding | 6  | 31082867  | 31088223  | CDSN      |
| ENSG00000204540 | 5.389447744 | 6.281901708 | protein_coding | 6  | 31082527  | 31107869  | PSORS1C1  |
| ENSG00000204544 | 0           | 0.390640832 | protein_coding | 6  | 30951485  | 30957680  | MUC21     |
| ENSG00000204556 | 0           | 1.353254395 | pseudogene     | 20 | 25999468  | 26001320  |           |
| ENSG00000204560 | 9.707122248 | 9.627311386 | protein_coding | 6  | 30620896  | 30640814  | DHX16     |
| ENSG00000204564 | 7.451199747 | 7.621426466 | protein_coding | 6  | 30614816  | 30620987  | C6orf136  |
| ENSG00000204566 | 0.499066092 | 0           | protein_coding | 10 | 23492745  | 23539610  | C10orf115 |
| ENSG00000204568 | 9.658518116 | 9.598086496 | protein_coding | 6  | 30585486  | 30594172  | MRPS18B   |
| ENSG00000204569 | 10.17977063 | 9.798797703 | protein_coding | 6  | 30568177  | 30586389  | PPP1R10   |
| ENSG00000204572 | 0.869158192 | 2.501982735 | protein_coding | 11 | 71276609  | 71279980  | KRTAP5-10 |
| ENSG00000204574 | 11.15241645 | 11.429952   | protein_coding | 6  | 30539153  | 30564956  | ABCF1     |
| ENSG00000204576 | 8.448779323 | 8.295320915 | protein_coding | 6  | 30524663  | 30531500  | PRR3      |
| ENSG00000204577 | 1.960915222 | 2.420525079 | protein_coding | 19 | 54720147  | 54746602  | LILRB3    |
| ENSG00000204580 | 10.43710307 | 9.36078013  | protein_coding | 6  | 30844198  | 30867933  | DDR1      |

|                 |             |             |                  |    |           |                    |
|-----------------|-------------|-------------|------------------|----|-----------|--------------------|
| ENSG00000204583 | 2.238690726 | 0.950786998 | lincRNA          | 12 | 133179736 | 133187037          |
| ENSG00000204584 | 3.393122761 | 4.17820932  | antisense        | 17 | 47923272  | 47926199           |
| ENSG00000204588 | 3.004694206 | 1.802319292 | processed_transc | 2  | 110744640 | 110753717          |
| ENSG00000204590 | 9.9349646   | 9.486810444 | protein_coding   | 6  | 30509154  | 30525008 GNL1      |
| ENSG00000204592 | 10.78169677 | 11.06017274 | protein_coding   | 6  | 30457244  | 30461982 HLA-E     |
| ENSG00000204595 | 0.499066092 | 0           | protein_coding   | 19 | 54135310  | 54140263 DPRX      |
| ENSG00000204599 | 7.04456449  | 7.216390925 | protein_coding   | 6  | 30294256  | 30314587 TRIM39    |
| ENSG00000204604 | 8.577659618 | 8.360927302 | protein_coding   | 19 | 53341786  | 53360902 ZNF468    |
| ENSG00000204610 | 1.407729925 | 0.950786998 | protein_coding   | 6  | 30130983  | 30140473 TRIM15    |
| ENSG00000204611 | 8.016241092 | 8.091661081 | protein_coding   | 19 | 52617654  | 52643191 ZNF616    |
| ENSG00000204613 | 0.499066092 | 1.353254395 | protein_coding   | 6  | 30119722  | 30128711 TRIM10    |
| ENSG00000204616 | 1.799000381 | 0.697730409 | protein_coding   | 6  | 30070674  | 30080883 TRIM31    |
| ENSG00000204618 | 4.491309013 | 4.29708397  | protein_coding   | 6  | 30038043  | 30043664 RNF39     |
| ENSG00000204619 | 9.454383134 | 9.497401522 | protein_coding   | 6  | 30034486  | 30038110 PPP1R11   |
| ENSG00000204620 | 4.437288965 | 3.608232228 | protein_coding   | X  | 48431482  | 48433275           |
| ENSG00000204622 | 2.35979773  | 2.501982735 | pseudogene       | 6  | 29974360  | 29977733 HLA-J     |
| ENSG00000204623 | 5.637181576 | 6.651226688 | antisense        | 6  | 29968788  | 30029417 ZNRD1-AS1 |
| ENSG00000204624 | 2.57521082  | 3.32456471  | protein_coding   | 1  | 11539223  | 11597641 PTCHD2    |
| ENSG00000204625 | 0           | 0.697730409 | lincRNA          | 6  | 29942889  | 29946183 HCG9      |
| ENSG00000204628 | 13.39753841 | 13.54572743 | protein_coding   | 5  | 180663909 | 180675096 GNB2L1   |
| ENSG00000204632 | 0.499066092 | 1.16600992  | protein_coding   | 6  | 29794744  | 29798902 HLA-G     |
| ENSG00000204634 | 8.269098624 | 7.534563804 | protein_coding   | 2  | 101624079 | 101869328 TBC1D8   |
| ENSG00000204637 | 0.499066092 | 0           | pseudogene       | 2  | 101125739 | 101126077          |
| ENSG00000204642 | 7.565780433 | 9.073276144 | protein_coding   | 6  | 29690552  | 29706305 HLA-F     |
| ENSG00000204644 | 3.448790144 | 4.319727133 | protein_coding   | 6  | 29640169  | 29648887 ZFP57     |
| ENSG00000204650 | 6.456028446 | 6.327306117 | pseudogene       | 17 | 43697976  | 43715325           |
| ENSG00000204653 | 3.744048221 | 3.411459265 | protein_coding   | 19 | 51014858  | 51017947 ASPDH     |
| ENSG00000204655 | 0           | 0.697730409 | protein_coding   | 6  | 29624758  | 29640149 MOG       |
| ENSG00000204657 | 2.10647801  | 3.279072565 | protein_coding   | 6  | 29555683  | 29556745 OR2H2     |
| ENSG00000204659 | 0.869158192 | 1.802319292 | protein_coding   | 5  | 179105584 | 179107975 CBY3     |
| ENSG00000204661 | 0.499066092 | 1.353254395 | protein_coding   | 5  | 179068545 | 179072047 C5orf60  |
| ENSG00000204673 | 10.22630637 | 10.08645176 | protein_coding   | 19 | 50372295  | 50381716 AKT1S1    |
| ENSG00000204681 | 8.620709081 | 8.771449152 | protein_coding   | 6  | 29523406  | 29601753 GABBR1    |
| ENSG00000204682 | 7.1740722   | 6.712401119 | protein_coding   | 10 | 21781587  | 21786191 C10orf114 |
| ENSG00000204683 | 0.499066092 | 0           | protein_coding   | 10 | 21414692  | 21435488 C10orf113 |
| ENSG00000204685 | 5.036678094 | 4.990346085 | processed_transc | 2  | 96874154  | 96908359           |
| ENSG00000204688 | 0.499066092 | 0.950786998 | protein_coding   | 6  | 29424958  | 29432105 OR2H1     |
| ENSG00000204706 | 0.869158192 | 0.950786998 | antisense        | 9  | 72768050  | 72790804           |
| ENSG00000204709 | 1.16343121  | 0.950786998 | protein_coding   | 6  | 28911654  | 28912314 C6orf100  |
| ENSG00000204710 | 0           | 0.697730409 | protein_coding   | 11 | 64937625  | 64940715 SPDYC     |
| ENSG00000204711 | 0           | 0.390640832 | protein_coding   | 9  | 72435709  | 72521148 C9orf135  |
| ENSG00000204713 | 10.24362336 | 10.54945594 | protein_coding   | 6  | 28870779  | 28891766 TRIM27    |
| ENSG00000204718 | 0           | 0.697730409 | pseudogene       | 13 | 19300846  | 19301554 CNN2P12   |
| ENSG00000204745 | 4.464551814 | 3.845183986 | pseudogene       | 2  | 87352513  | 87423770           |
| ENSG00000204758 | 3.989024711 | 4.250702764 | lincRNA          | 5  | 172381789 | 172386395          |
| ENSG00000204764 | 6.236372259 | 6.690849666 | protein_coding   | 5  | 170288874 | 170727019 RANBP17  |
| ENSG00000204771 | 0.499066092 | 0.950786998 | pseudogene       | 8  | 145462709 | 145485885          |
| ENSG00000204772 | 0.499066092 | 0           | sense_intronic   | 3  | 41915024  | 41916531 ULK4-IT1  |
| ENSG00000204778 | 2.10647801  | 2.242360793 | pseudogene       | 9  | 70181520  | 70216621           |
| ENSG00000204779 | 0.499066092 | 0.390640832 | protein_coding   | 9  | 70175707  | 70178815 FOXD4L5   |
| ENSG00000204788 | 0           | 0.697730409 | pseudogene       | 9  | 69377902  | 69380597           |
| ENSG00000204789 | 5.948480845 | 6.142791909 | pseudogene       | 6  | 27325604  | 27339304 ZNF204P   |
| ENSG00000204790 | 5.485736881 | 5.486957566 | protein_coding   | 9  | 69204538  | 69272478 CBWD6     |
| ENSG00000204791 | 2.10647801  | 2.039052734 | antisense        | 8  | 145104030 | 145106423          |
| ENSG00000204792 | 1.960915222 | 3.748356452 | lincRNA          | 2  | 75145275  | 75165545           |
| ENSG00000204794 | 2.57521082  | 1.925536307 | pseudogene       | 9  | 68741234  | 68809906 PGM5P1    |
| ENSG00000204802 | 2.928422289 | 2.144285137 | processed_transc | 9  | 46685429  | 46688137           |
| ENSG00000204804 | 0           | 0.950786998 | pseudogene       | 9  | 45727513  | 45727852 FAM27D1   |
| ENSG00000204805 | 1.407729925 | 0.697730409 | pseudogene       | 9  | 44997777  | 44999352 FAM27E1   |
| ENSG00000204807 | 1.407729925 | 1.667587519 | protein_coding   | 9  | 45733559  | 45734896 FAM27E2   |
| ENSG00000204813 | 0.499066092 | 0.950786998 | pseudogene       | 9  | 46387012  | 46387222           |
| ENSG00000204814 | 0.499066092 | 0.950786998 | protein_coding   | 9  | 44867571  | 44870528           |
| ENSG00000204815 | 3.871730003 | 3.368666104 | protein_coding   | 17 | 40086898  | 40117648           |



|                 |             |             |                  |    |           |                     |
|-----------------|-------------|-------------|------------------|----|-----------|---------------------|
| ENSG00000204818 | 0.499066092 | 0.697730409 | pseudogene       | 9  | 44170447  | 44175727            |
| ENSG00000204822 | 3.744048221 | 4.250702764 | protein_coding   | 2  | 74699085  | 74700449 MRPL53     |
| ENSG00000204837 | 1.616589159 | 0.390640832 | lincRNA          | 9  | 41961615  | 42019580            |
| ENSG00000204839 | 6.931877181 | 4.17820932  | protein_coding   | 8  | 144648357 | 144655141 C8orf73   |
| ENSG00000204842 | 9.158235462 | 9.117563863 | protein_coding   | 12 | 111890018 | 112037480 ATXN2     |
| ENSG00000204843 | 10.86109943 | 11.04751044 | protein_coding   | 2  | 74588281  | 74619214 DCTN1      |
| ENSG00000204851 | 0.499066092 | 0           | protein_coding   | 19 | 46994453  | 46998722 PNMAL2     |
| ENSG00000204852 | 7.858191159 | 8.622319665 | protein_coding   | 12 | 111051832 | 111087235 TCTN1     |
| ENSG00000204856 | 7.08903805  | 7.966311947 | protein_coding   | 12 | 110906169 | 110928190 C12orf24  |
| ENSG00000204859 | 7.194570056 | 7.182818183 | protein_coding   | 1  | 6640061   | 6649340 ZBTB48      |
| ENSG00000204860 | 4.491309013 | 4.94736961  | protein_coding   | 9  | 38620471  | 38624987 FAM201A    |
| ENSG00000204869 | 0.499066092 | 0.950786998 | protein_coding   | 19 | 46543006  | 46544274 IGFL4      |
| ENSG00000204876 | 2.57521082  | 3.570966319 | protein_coding   | 7  | 155755326 | 155759037           |
| ENSG00000204880 | 1.16343121  | 0           | protein_coding   | 17 | 39253233  | 39254393 KRTAP4-8   |
| ENSG00000204894 | 2.471521042 | 2.788380093 | pseudogene       | 7  | 152064256 | 152064345           |
| ENSG00000204899 | 7.850461307 | 7.122922611 | protein_coding   | 13 | 73282495  | 73301825 MZT1       |
| ENSG00000204904 | 0.869158192 | 1.667587519 | protein_coding   | X  | 46746852  | 46759138 CXorf31    |
| ENSG00000204920 | 6.94645393  | 7.053694091 | protein_coding   | 19 | 44488346  | 44502477 ZNF155     |
| ENSG00000204922 | 6.328285199 | 7.057067116 | protein_coding   | 11 | 62437745  | 62441159 C11orf83   |
| ENSG00000204923 | 3.502389126 | 3.608232228 | protein_coding   | 2  | 68689486  | 68694390 FBXO48     |
| ENSG00000204929 | 0.869158192 | 1.518964905 | processed_transc | 2  | 65663864  | 66126649            |
| ENSG00000204930 | 0.869158192 | 0.950786998 | protein_coding   | 9  | 35816388  | 35828744 C9orf128   |
| ENSG00000204934 | 5.695874189 | 6.009862691 | processed_transc | 7  | 149564786 | 149577699           |
| ENSG00000204936 | 3.335220907 | 3.813624741 | protein_coding   | 19 | 43857825  | 43867480 CD177      |
| ENSG00000204941 | 3.78787645  | 3.608232228 | protein_coding   | 19 | 43670408  | 43690688 PSG5       |
| ENSG00000204946 | 6.749949642 | 6.699508919 | protein_coding   | 7  | 148959262 | 148994393 ZNF783    |
| ENSG00000204947 | 5.107569429 | 6.246885341 | protein_coding   | 7  | 148799876 | 148823438 ZNF425    |
| ENSG00000204949 | 4.689181911 | 3.679994897 | antisense        | 8  | 124213412 | 124214983           |
| ENSG00000204950 | 1.799000381 | 1.802319292 | protein_coding   | 11 | 61276272  | 61278482 LRRC10B    |
| ENSG00000204952 | 1.16343121  | 0.950786998 | protein_coding   | 17 | 37092685  | 37123655 FBXO47     |
| ENSG00000204954 | 5.752272083 | 6.091080508 | protein_coding   | 12 | 104343980 | 104359486 C12orf73  |
| ENSG00000204956 | 3.911897206 | 3.081239798 | protein_coding   | 5  | 140710252 | 140892546 PCDHGA1   |
| ENSG00000204957 | 2.10647801  | 1.518964905 | protein_coding   | 19 | 42746927  | 42749125            |
| ENSG00000204959 | 3.335220907 | 1.667587519 | pseudogene       | 7  | 143969538 | 143991256           |
| ENSG00000204961 | 3.077135474 | 2.501982735 | protein_coding   | 5  | 140227048 | 140391929 PCDHA9    |
| ENSG00000204962 | 2.57521082  | 2.039052734 | protein_coding   | 5  | 140220907 | 140391929 PCDHA8    |
| ENSG00000204963 | 6.585843317 | 6.403479675 | protein_coding   | 5  | 140213969 | 140391929 PCDHA7    |
| ENSG00000204965 | 4.999881834 | 4.274079748 | protein_coding   | 5  | 140201222 | 140391929 PCDHA5    |
| ENSG00000204967 | 4.800350936 | 4.976162367 | protein_coding   | 5  | 140186659 | 140391929 PCDHA4    |
| ENSG00000204969 | 3.393122761 | 3.368666104 | protein_coding   | 5  | 140174444 | 140391929 PCDHA2    |
| ENSG00000204970 | 6.171673665 | 6.3217081   | protein_coding   | 5  | 140165876 | 140391929 PCDHA1    |
| ENSG00000204977 | 6.343050432 | 6.287656023 | protein_coding   | 13 | 50570024  | 50594617 TRIM13     |
| ENSG00000204983 | 0.869158192 | 0           | protein_coding   | 7  | 142457319 | 142460923 PRSS1     |
| ENSG00000204991 | 7.743231983 | 7.619146302 | protein_coding   | 16 | 89884587  | 89937727 SPIRE2     |
| ENSG00000205014 | 4.77879189  | 4.7279204   | protein_coding   | 16 | 89284120  | 89302402            |
| ENSG00000205021 | 0           | 0.390640832 | protein_coding   | 17 | 34623842  | 34625731 CCL3L1     |
| ENSG00000205022 | 0.499066092 | 0           | protein_coding   | 16 | 88928034  | 88933068 PABPN1L    |
| ENSG00000205036 | 3.744048221 | 5.175534283 | protein_coding   | 16 | 88620112  | 88636548 C16orf85   |
| ENSG00000205037 | 1.616589159 | 1.802319292 | processed_transc | 16 | 88121647  | 88134591            |
| ENSG00000205041 | 1.960915222 | 3.027231696 | protein_coding   | 19 | 40779396  | 40781386            |
| ENSG00000205045 | 0.499066092 | 0           | protein_coding   | 17 | 33800708  | 33864880 SLFN12L    |
| ENSG00000205047 | 6.509364082 | 6.037446454 | protein_coding   | 16 | 87731749  | 87739290            |
| ENSG00000205056 | 1.799000381 | 1.667587519 | processed_transc | 12 | 92815307  | 92885703 CLLU1      |
| ENSG00000205057 | 0.499066092 | 0.390640832 | protein_coding   | 12 | 92813870  | 92821924 CLLU10S    |
| ENSG00000205060 | 8.857651982 | 8.453421159 | protein_coding   | 7  | 133974084 | 134001803 SLC35B4   |
| ENSG00000205076 | 0.499066092 | 0           | protein_coding   | 19 | 39261608  | 39264157 LGALS7     |
| ENSG00000205078 | 3.211941663 | 3.748356452 | protein_coding   | 16 | 77233294  | 77247112 SYCE1L     |
| ENSG00000205084 | 7.73205733  | 8.247406493 | protein_coding   | 16 | 75572015  | 75590176 TMEM231    |
| ENSG00000205085 | 3.004694206 | 1.925536307 | protein_coding   | 7  | 128312342 | 128326929 FAM71F2   |
| ENSG00000205086 | 0           | 0.390640832 | protein_coding   | 2  | 42162508  | 42181406            |
| ENSG00000205089 | 2.35979773  | 1.802319292 | protein_coding   | 5  | 132083137 | 132089856 CCNI2     |
| ENSG00000205090 | 0.499066092 | 1.667587519 | protein_coding   | 1  | 1470554   | 1475833 TMEM240     |
| ENSG00000205100 | 1.616589159 | 0.950786998 | pseudogene       | 4  | 190394119 | 190396346 HSP90AA4P |

|                 |             |             |                  |    |           |           |            |
|-----------------|-------------|-------------|------------------|----|-----------|-----------|------------|
| ENSG00000205105 | 0.499066092 | 0           | pseudogene       | 13 | 47064997  | 47065397  | COX17P1    |
| ENSG00000205108 | 0.499066092 | 0.950786998 | protein_coding   | 9  | 34723052  | 34729464  | FAM205A    |
| ENSG00000205116 | 1.407729925 | 1.353254395 | protein_coding   | 1  | 1361508   | 1363167   | TMEM88B    |
| ENSG00000205129 | 2.847891871 | 4.841813558 | protein_coding   | 4  | 186347394 | 186370980 | C4orf47    |
| ENSG00000205133 | 6.228441838 | 6.349483465 | protein_coding   | 8  | 93895758  | 94029901  | C8orf83    |
| ENSG00000205138 | 6.298293508 | 6.651226688 | protein_coding   | 19 | 36486090  | 36487220  | SDHAF1     |
| ENSG00000205143 | 1.616589159 | 1.16600992  | protein_coding   | 9  | 34621376  | 34628104  | ARID3C     |
| ENSG00000205147 | 2.847891871 | 3.493416095 | protein_coding   | 19 | 4041127   | 4043154   |            |
| ENSG00000205155 | 8.221948786 | 8.272288337 | protein_coding   | 19 | 36236494  | 36237903  | PSENE1     |
| ENSG00000205177 | 1.960915222 | 1.353254395 | protein_coding   | 11 | 33719807  | 33722347  | C11orf91   |
| ENSG00000205181 | 0           | 2.334191469 | processed_transc | 20 | 5480969   | 5485259   |            |
| ENSG00000205184 | 0           | 0.697730409 | pseudogene       | 8  | 82546592  | 82547897  |            |
| ENSG00000205189 | 8.623735441 | 8.490068116 | protein_coding   | 8  | 81397854  | 81438500  | ZBTB10     |
| ENSG00000205208 | 7.413224588 | 7.791043682 | protein_coding   | 4  | 159587831 | 159593407 | C4orf46    |
| ENSG00000205209 | 1.407729925 | 1.925536307 | protein_coding   | 19 | 35084347  | 35085490  | SCGB2B2    |
| ENSG00000205212 | 4.381167248 | 4.15321211  | protein_coding   | 17 | 20739760  | 20799453  | CCDC144NL  |
| ENSG00000205213 | 9.712107084 | 9.726498497 | protein_coding   | 11 | 27387508  | 27494322  | LGR4       |
| ENSG00000205217 | 1.616589159 | 1.925536307 | protein_coding   | 17 | 20320741  | 20322363  | FAM106B    |
| ENSG00000205220 | 8.301587982 | 8.449576416 | protein_coding   | 16 | 67968405  | 67970990  | PSMB10     |
| ENSG00000205221 | 0.499066092 | 1.518964905 | protein_coding   | 2  | 36923833  | 37041935  | VIT        |
| ENSG00000205233 | 0           | 0.390640832 | protein_coding   | 7  | 102312908 | 102319318 |            |
| ENSG00000205238 | 0.499066092 | 0.697730409 | protein_coding   | 7  | 102191679 | 102202755 | SPDYE2     |
| ENSG00000205246 | 6.014532757 | 6.304782526 | protein_coding   | 19 | 23945807  | 24010937  | RPSAP58    |
| ENSG00000205250 | 10.17771289 | 10.21619866 | protein_coding   | 16 | 67226072  | 67232821  | E2F4       |
| ENSG00000205266 | 0.499066092 | 0           | processed_transc | 17 | 18319042  | 18328411  |            |
| ENSG00000205268 | 7.737655476 | 7.23139676  | protein_coding   | 8  | 66629745  | 66754557  | PDE7A      |
| ENSG00000205269 | 4.437288965 | 5.339632724 | protein_coding   | 6  | 11537938  | 11583757  | TMEM170B   |
| ENSG00000205277 | 1.799000381 | 1.353254395 | protein_coding   | 7  | 100612904 | 100662230 | MUC12      |
| ENSG00000205293 | 0           | 1.353254395 | lincRNA          | 8  | 58890917  | 58896685  |            |
| ENSG00000205300 | 3.393122761 | 3.279072565 | protein_coding   | 20 | 4050799   | 4055812   |            |
| ENSG00000205302 | 8.903197794 | 9.005932523 | protein_coding   | 5  | 122110691 | 122165803 | SNX2       |
| ENSG00000205309 | 6.681890601 | 6.97385478  | protein_coding   | 17 | 17206649  | 17250977  | NT5M       |
| ENSG00000205318 | 0.869158192 | 1.16600992  | protein_coding   | 6  | 10633993  | 10647501  | GCNT6      |
| ENSG00000205323 | 4.689181911 | 4.777836593 | protein_coding   | 12 | 56146247  | 56211540  | SARNP      |
| ENSG00000205325 | 0.869158192 | 1.667587519 | protein_coding   | 17 | 14670900  | 14683520  |            |
| ENSG00000205333 | 0           | 0.390640832 | pseudogene       | 8  | 87669616  | 87672521  | GOLGA2P1   |
| ENSG00000205334 | 4.352265886 | 5.187895122 | protein_coding   | 2  | 27928653  | 27938599  |            |
| ENSG00000205336 | 10.34795706 | 9.397831074 | protein_coding   | 16 | 57644564  | 57698944  | GPR56      |
| ENSG00000205339 | 11.52987465 | 11.53225786 | protein_coding   | 11 | 9406169   | 9469673   | IPO7       |
| ENSG00000205352 | 8.602416377 | 8.502492199 | protein_coding   | 12 | 53835389  | 53840429  | PRR13      |
| ENSG00000205356 | 8.821205846 | 8.043160634 | protein_coding   | 7  | 97843936  | 97881563  | TECPR1     |
| ENSG00000205358 | 0           | 0.390640832 | protein_coding   | 16 | 56703726  | 56705041  | MT1H       |
| ENSG00000205361 | 0           | 0.697730409 | pseudogene       | 16 | 56677617  | 56678698  | MT1DP      |
| ENSG00000205362 | 4.593635215 | 5.317302248 | protein_coding   | 16 | 56672578  | 56673999  | MT1A       |
| ENSG00000205364 | 1.407729925 | 2.334191469 | protein_coding   | 16 | 56666145  | 56667898  | MT1M       |
| ENSG00000205396 | 0.499066092 | 0           | processed_transc | 19 | 16126097  | 16138723  |            |
| ENSG00000205403 | 2.762599152 | 0.950786998 | protein_coding   | 4  | 110661852 | 110723335 | CFI        |
| ENSG00000205412 | 0           | 0.950786998 | pseudogene       | 3  | 147884131 | 147885085 | HNRNPA1P20 |
| ENSG00000205413 | 8.819887015 | 8.956216712 | protein_coding   | 7  | 92728829  | 92747336  | SAMD9      |
| ENSG00000205414 | 0           | 0.390640832 | antisense        | 16 | 50639987  | 50647595  |            |
| ENSG00000205423 | 6.984620223 | 7.176629214 | protein_coding   | 16 | 50058321  | 50070999  | TMEM188    |
| ENSG00000205424 | 0           | 0.390640832 | antisense        | 21 | 47247875  | 47256333  |            |
| ENSG00000205426 | 2.762599152 | 2.788380093 | protein_coding   | 12 | 52679697  | 52685318  | KRT81      |
| ENSG00000205436 | 4.821592551 | 4.528525526 | protein_coding   | 14 | 103566481 | 103576896 | EXOC3L4    |
| ENSG00000205464 | 3.989024711 | 5.125003832 | protein_coding   | 5  | 81575281  | 81682796  | ATP6AP1L   |
| ENSG00000205476 | 9.333898174 | 8.032919217 | protein_coding   | 14 | 99977603  | 100070363 | CCDC85C    |
| ENSG00000205482 | 1.16343121  | 0.697730409 | pseudogene       | 7  | 76682095  | 76688757  |            |
| ENSG00000205485 | 5.785082014 | 5.516660875 | pseudogene       | 7  | 76178677  | 76257299  |            |
| ENSG00000205488 | 0.499066092 | 0           | antisense        | 10 | 5556207   | 5568209   |            |
| ENSG00000205500 | 2.35979773  | 0.697730409 | processed_transc | 2  | 27207644  | 27237480  |            |
| ENSG00000205502 | 1.407729925 | 2.788380093 | protein_coding   | 15 | 62455734  | 62457482  | C2CD4B     |
| ENSG00000205517 | 7.423680977 | 6.445267191 | protein_coding   | 19 | 11495017  | 11530018  | RGL3       |
| ENSG00000205531 | 10.43279577 | 10.40273907 | protein_coding   | 11 | 2965661   | 3013607   | NAP1L4     |

|                 |             |             |                  |    |           |                       |
|-----------------|-------------|-------------|------------------|----|-----------|-----------------------|
| ENSG00000205534 | 2.57521082  | 2.788380093 | pseudogene       | 16 | 29538889  | 29606395              |
| ENSG00000205537 | 0.499066092 | 1.353254395 | antisense        | 12 | 48276432  | 48295308              |
| ENSG00000205542 | 12.10834152 | 12.9952996  | protein_coding   | X  | 12993227  | 12995346 TMSB4X       |
| ENSG00000205544 | 6.710639711 | 7.766528853 | protein_coding   | 17 | 7306294   | 7307456 C17orf61      |
| ENSG00000205549 | 0           | 0.390640832 | protein_coding   | 9  | 16203933  | 16276311 C9orf92      |
| ENSG00000205559 | 2.671945279 | 3.64455972  | antisense        | 22 | 51021455  | 51022306              |
| ENSG00000205560 | 4.437288965 | 5.112089758 | protein_coding   | 22 | 51007290  | 51017899 CPT1B        |
| ENSG00000205562 | 1.407729925 | 0.697730409 | lincRNA          | 14 | 85991477  | 85996332              |
| ENSG00000205571 | 4.593635215 | 4.585695337 | protein_coding   | 5  | 69345350  | 69374349 SMN2         |
| ENSG00000205572 | 0.499066092 | 1.16600992  | protein_coding   | 5  | 69321074  | 69338940 SERF1B       |
| ENSG00000205578 | 1.407729925 | 0.697730409 | pseudogene       | 7  | 72707497  | 72716496 POM121B      |
| ENSG00000205579 | 0           | 0.950786998 | pseudogene       | 14 | 81712638  | 81712907 DYNLL1P1     |
| ENSG00000205581 | 10.09016702 | 10.29830006 | protein_coding   | 21 | 40714241  | 40721573 HMGN1        |
| ENSG00000205583 | 6.014532757 | 6.198834244 | protein_coding   | 7  | 74988429  | 75024657 STAG3L1      |
| ENSG00000205584 | 0           | 0.390640832 | pseudogene       | 7  | 72440345  | 72442258              |
| ENSG00000205593 | 6.579622637 | 6.104183162 | protein_coding   | 22 | 50750392  | 50765489 FAM116B      |
| ENSG00000205609 | 0.499066092 | 0.950786998 | protein_coding   | 16 | 28390900  | 28415200 EIF3CL       |
| ENSG00000205629 | 8.103376106 | 8.360927302 | protein_coding   | 16 | 25123047  | 25189552 LCMT1        |
| ENSG00000205634 | 1.16343121  | 2.144285137 | processed_transc | 22 | 48016792  | 48027318              |
| ENSG00000205639 | 2.35979773  | 1.925536307 | protein_coding   | 2  | 24232951  | 24286191 MFSD2B       |
| ENSG00000205643 | 6.407685389 | 6.520498852 | protein_coding   | 22 | 46639908  | 46646576 C22orf40     |
| ENSG00000205644 | 0           | 1.16600992  | pseudogene       | 5  | 64711180  | 64712049              |
| ENSG00000205659 | 7.066972635 | 7.057067116 | protein_coding   | 14 | 74551499  | 74667936 LIN52        |
| ENSG00000205664 | 6.482942724 | 6.866449614 | protein_coding   | X  | 3734598   | 3761934               |
| ENSG00000205669 | 1.16343121  | 0.697730409 | protein_coding   | 14 | 74077649  | 74086592 ACOT6        |
| ENSG00000205670 | 6.482942724 | 6.847095496 | protein_coding   | 21 | 35747779  | 35780164 FAM165B      |
| ENSG00000205673 | 0.869158192 | 0.697730409 | lincRNA          | 21 | 35321230  | 35336260              |
| ENSG00000205678 | 0.499066092 | 0           | protein_coding   | 4  | 65140975  | 65275186 TECRL        |
| ENSG00000205683 | 5.331395195 | 5.726093467 | protein_coding   | 14 | 73075742  | 73360809 DPF3         |
| ENSG00000205702 | 3.274897671 | 3.87606762  | polymorphic_pse  | 22 | 42536214  | 42540576 CYP2D7P1     |
| ENSG00000205704 | 3.652182994 | 3.532712221 | pseudogene       | 22 | 42348169  | 42354937              |
| ENSG00000205707 | 5.538004898 | 6.030599799 | protein_coding   | 12 | 25348150  | 25362579 LYRM5        |
| ENSG00000205710 | 3.554067925 | 3.368666104 | protein_coding   | 17 | 4802713   | 4806227 C17orf107     |
| ENSG00000205726 | 8.783815073 | 8.949880022 | protein_coding   | 21 | 35014706  | 35272165 ITSN1        |
| ENSG00000205730 | 10.67341097 | 10.63488845 | protein_coding   | 16 | 19125254  | 19138618 ITPRIPL2     |
| ENSG00000205740 | 0.869158192 | 1.16600992  | protein_coding   | 10 | 1017097   | 1034281               |
| ENSG00000205744 | 6.428602508 | 4.15321211  | protein_coding   | 19 | 6467219   | 6481798 DENND1C       |
| ENSG00000205746 | 4.19837882  | 4.547834947 | pseudogene       | 16 | 18428257  | 18488396              |
| ENSG00000205755 | 4.409500985 | 6.460630645 | protein_coding   | X  | 1314890   | 1331616 CRLF2         |
| ENSG00000205758 | 6.704935538 | 7.087074634 | protein_coding   | 21 | 34961647  | 35016232 CRYZL1       |
| ENSG00000205763 | 5.331395195 | 5.42565083  | pseudogene       | 7  | 32956427  | 32982788 RP9P         |
| ENSG00000205765 | 10.10918645 | 10.08397376 | protein_coding   | 5  | 41904290  | 41921738 C5orf51      |
| ENSG00000205771 | 4.261916566 | 3.845183986 | pseudogene       | 15 | 44019116  | 44039292 CATSPER2P1   |
| ENSG00000205783 | 3.448790144 | 3.279072565 | protein_coding   | 5  | 38819804  | 38821581              |
| ENSG00000205784 | 0.499066092 | 0           | protein_coding   | 19 | 4890449   | 4902879 ARRD5         |
| ENSG00000205785 | 0.499066092 | 0.950786998 | protein_coding   | 5  | 38820766  | 38823298              |
| ENSG00000205790 | 5.909333162 | 5.792353798 | protein_coding   | 19 | 4679294   | 4685960               |
| ENSG00000205791 | 1.616589159 | 2.242360793 | protein_coding   | 12 | 12508342  | 12510001              |
| ENSG00000205794 | 0           | 0.697730409 | pseudogene       | 4  | 40044537  | 40058819              |
| ENSG00000205795 | 0           | 0.950786998 | protein_coding   | 2  | 10196907  | 10221071 CYS1         |
| ENSG00000205808 | 5.124761037 | 5.236305879 | protein_coding   | 9  | 4662298   | 4665256 PPAPDC2       |
| ENSG00000205809 | 0           | 0.390640832 | protein_coding   | 12 | 10579453  | 10594899 KLRC2        |
| ENSG00000205810 | 1.616589159 | 2.144285137 | protein_coding   | 12 | 10564911  | 10573194 KLRC3        |
| ENSG00000205821 | 3.274897671 | 3.081239798 | protein_coding   | 17 | 2310279   | 2318731               |
| ENSG00000205832 | 0.499066092 | 1.353254395 | protein_coding   | 16 | 4606491   | 4650715 C16orf96      |
| ENSG00000205835 | 0.499066092 | 0           | protein_coding   | 3  | 190570666 | 190610218 GMNC        |
| ENSG00000205838 | 2.57521082  | 3.081239798 | protein_coding   | 5  | 34838938  | 34899561 TTC23L       |
| ENSG00000205847 | 0.499066092 | 0           | pseudogene       | 2  | 71256158  | 71256736              |
| ENSG00000205853 | 1.960915222 | 2.334191469 | protein_coding   | 22 | 32755893  | 32767063 RFPL3-AS1    |
| ENSG00000205856 | 2.238690726 | 2.334191469 | protein_coding   | 22 | 32544993  | 32555309 C22orf42     |
| ENSG00000205861 | 0.869158192 | 0           | antisense        | 13 | 24463028  | 24471402 C1QTNF9B-AS1 |
| ENSG00000205863 | 3.004694206 | 3.133298822 | protein_coding   | 13 | 24462240  | 24476794 C1QTNF9B     |
| ENSG00000205869 | 1.616589159 | 1.16600992  | protein_coding   | 11 | 1605572   | 1606513 KRTAP5-1      |

|                 |             |             |                  |    |           |           |            |
|-----------------|-------------|-------------|------------------|----|-----------|-----------|------------|
| ENSG00000205871 | 1.407729925 | 1.802319292 | pseudogene       | 15 | 43407897  | 43408691  | RPS3AP47   |
| ENSG00000205873 | 5.175139844 | 5.059245468 | protein_coding   | 8  | 12294626  | 12424423  |            |
| ENSG00000205879 | 0.499066092 | 0.950786998 | pseudogene       | 8  | 12029711  | 12036084  | FAM90A2P   |
| ENSG00000205885 | 5.795854912 | 5.446377228 | antisense        | 12 | 7260648   | 7275097   |            |
| ENSG00000205890 | 1.616589159 | 0           | protein_coding   | 16 | 3082482   | 3089131   |            |
| ENSG00000205898 | 0.499066092 | 1.802319292 | pseudogene       | 7  | 124800028 | 124800601 |            |
| ENSG00000205903 | 8.280649185 | 7.830998152 | pseudogene       | 7  | 6676953   | 6694242   |            |
| ENSG00000205913 | 3.698846687 | 4.17820932  | protein_coding   | 16 | 2787104   | 2790805   |            |
| ENSG00000205918 | 1.16343121  | 2.144285137 | pseudogene       | 16 | 2666122   | 2693297   |            |
| ENSG00000205922 | 0           | 0.390640832 | protein_coding   | 19 | 1752372   | 1780987   | ONECUT3    |
| ENSG00000205929 | 0           | 0.697730409 | protein_coding   | 21 | 34162985  | 34186053  | C21orf62   |
| ENSG00000205930 | 1.16343121  | 2.788380093 | protein_coding   | 21 | 34144411  | 34266043  | C21orf49   |
| ENSG00000205937 | 10.44225492 | 10.85626414 | protein_coding   | 16 | 2303117   | 2318413   | RNPS1      |
| ENSG00000205940 | 1.799000381 | 1.667587519 | pseudogene       | 4  | 13338103  | 13339926  | HSP90AB2P  |
| ENSG00000205955 | 1.16343121  | 0.950786998 | pseudogene       | 3  | 183833140 | 183835686 | HSP90AA5P  |
| ENSG00000205959 | 2.238690726 | 3.183544561 | processed_transc | 4  | 8483997   | 8514337   |            |
| ENSG00000205978 | 4.261916566 | 2.144285137 | protein_coding   | 14 | 24867992  | 24888494  | NYNRIN     |
| ENSG00000205981 | 6.965663283 | 7.219404604 | protein_coding   | 3  | 180701497 | 180707562 | DNAJC19    |
| ENSG00000206013 | 0           | 0.697730409 | protein_coding   | 11 | 298200    | 299526    | IFITM5     |
| ENSG00000206028 | 0           | 0.390640832 | processed_transc | 22 | 27063656  | 27068617  |            |
| ENSG00000206043 | 0           | 0.390640832 | protein_coding   | 18 | 71983110  | 72026422  | C18orf63   |
| ENSG00000206044 | 2.762599152 | 2.144285137 | protein_coding   | 12 | 2958397   | 2966213   |            |
| ENSG00000206053 | 11.34831854 | 11.37948398 | protein_coding   | 16 | 1728257   | 1752281   | HN1L       |
| ENSG00000206066 | 1.16343121  | 2.420525079 | pseudogene       | 22 | 25714223  | 25716047  | IGLL3P     |
| ENSG00000206073 | 6.155035276 | 3.845183986 | protein_coding   | 18 | 61304493  | 61311532  | SERPINB4   |
| ENSG00000206075 | 8.415986232 | 2.039052734 | protein_coding   | 18 | 61143994  | 61172318  | SERPINB5   |
| ENSG00000206077 | 1.616589159 | 2.334191469 | protein_coding   | 5  | 710475    | 767067    | ZDHC11B    |
| ENSG00000206082 | 5.124761037 | 4.693656882 | protein_coding   | 19 | 200112    | 202173    |            |
| ENSG00000206113 | 0           | 0.390640832 | antisense        | 4  | 2420701   | 2430972   |            |
| ENSG00000206127 | 0           | 0.390640832 | protein_coding   | 15 | 32737307  | 32747835  |            |
| ENSG00000206140 | 2.671945279 | 2.501982735 | processed_transc | 22 | 21820712  | 21825558  | TMEM191C   |
| ENSG00000206144 | 0.499066092 | 0           | pseudogene       | 8  | 54449620  | 54452860  |            |
| ENSG00000206145 | 2.762599152 | 2.334191469 | pseudogene       | 22 | 21389532  | 21399306  | P2RX6P     |
| ENSG00000206147 | 2.471521042 | 1.667587519 | pseudogene       | 9  | 6639139   | 6639604   |            |
| ENSG00000206149 | 5.588445295 | 6.016808232 | pseudogene       | 15 | 28834638  | 28930410  | HERC2P9    |
| ENSG00000206150 | 0           | 1.353254395 | protein_coding   | 14 | 21500979  | 21502944  | RNASE13    |
| ENSG00000206168 | 0.499066092 | 0           | pseudogene       | 16 | 281133    | 281471    |            |
| ENSG00000206176 | 0.499066092 | 0.390640832 | lincRNA          | 22 | 20378814  | 20380440  |            |
| ENSG00000206181 | 1.16343121  | 0.390640832 | protein_coding   | 18 | 44558943  | 44561988  | TCEB3B     |
| ENSG00000206190 | 2.471521042 | 0.390640832 | protein_coding   | 15 | 25922420  | 26110317  | ATP10A     |
| ENSG00000206192 | 0           | 0.950786998 | pseudogene       | 13 | 19390858  | 19446107  | ANKRD20A9P |
| ENSG00000206195 | 7.093410923 | 8.254769334 | pseudogene       | 22 | 16147979  | 16193004  |            |
| ENSG00000206199 | 0.499066092 | 0           | protein_coding   | 3  | 149478892 | 149686172 | ANKUB1     |
| ENSG00000206228 | 0.869158192 | 0           | pseudogene       | 8  | 83203859  | 83204614  | HNRNPA1P4  |
| ENSG00000206252 | 6.502803968 | 8.206984494 | protein_coding   | 22 | 16157306  | 16157938  |            |
| ENSG00000206260 | 0           | 0.390640832 | protein_coding   | 3  | 138722804 | 138725110 | PRR23A     |
| ENSG00000206262 | 4.19837882  | 4.794098771 | protein_coding   | 3  | 138666076 | 138672293 | C3orf72    |
| ENSG00000206337 | 7.345180517 | 8.117738058 | processed_transc | 6  | 31368479  | 31445283  | HCP5       |
| ENSG00000206341 | 6.882196036 | 8.005247922 | pseudogene       | 6  | 29855350  | 29858259  | HLA-H      |
| ENSG00000206344 | 2.35979773  | 3.279072565 | protein_coding   | 6  | 31165537  | 31171745  | HCG27      |
| ENSG00000206384 | 1.960915222 | 2.144285137 | protein_coding   | 3  | 130279178 | 130396999 | COL6A6     |
| ENSG00000206417 | 3.871730003 | 4.810179682 | antisense        | 3  | 129034235 | 129045068 | H1FX-AS1   |
| ENSG00000206418 | 8.585441838 | 8.423679567 | protein_coding   | 18 | 8609443   | 8639380   | RAB12      |
| ENSG00000206448 | 1.16343121  | 0.697730409 | pseudogene       | 10 | 15196801  | 15197319  |            |
| ENSG00000206503 | 11.66160272 | 12.75789552 | protein_coding   | 6  | 29909037  | 29913661  | HLA-A      |
| ENSG00000206527 | 9.648151859 | 9.871961511 | protein_coding   | 3  | 123209667 | 123304032 | PTPLB      |
| ENSG00000206530 | 5.741167503 | 7.00911166  | protein_coding   | 3  | 113005777 | 113160457 | WDR52      |
| ENSG00000206532 | 4.097495944 | 7.138927266 | protein_coding   | 3  | 110607231 | 110612323 |            |
| ENSG00000206535 | 5.637181576 | 5.41517489  | protein_coding   | 3  | 100120037 | 100175163 | LNP1       |
| ENSG00000206549 | 0.869158192 | 0.390640832 | protein_coding   | 3  | 46753605  | 46854064  | PRSS50     |
| ENSG00000206557 | 0.499066092 | 0           | protein_coding   | 3  | 32859510  | 32933771  | TRIM71     |
| ENSG00000206559 | 1.407729925 | 1.802319292 | protein_coding   | 3  | 28390637  | 28579613  | ZCWPW2     |
| ENSG00000206560 | 9.529725156 | 9.323452948 | protein_coding   | 3  | 15708743  | 15901278  | ANKRD28    |

|                 |             |             |                  |    |           |           |             |
|-----------------|-------------|-------------|------------------|----|-----------|-----------|-------------|
| ENSG00000206561 | 2.35979773  | 3.906303962 | protein_coding   | 3  | 15491640  | 15563258  | COLQ        |
| ENSG00000206562 | 6.652556929 | 6.568558581 | protein_coding   | 3  | 15422782  | 15469047  | METTL6      |
| ENSG00000206567 | 4.19837882  | 4.640685763 | processed_transc | 3  | 10048102  | 10052893  |             |
| ENSG00000206573 | 6.496213887 | 6.716673044 | processed_transc | 3  | 9391373   | 9440263   |             |
| ENSG00000206582 | 0.869158192 |             | 0 misc_RNA       | 20 | 33114315  | 33114411  |             |
| ENSG00000206595 | 0           | 0.390640832 | snRNA            | 1  | 51847980  | 51848086  |             |
| ENSG00000206597 | 3.744048221 | 4.990346085 | snoRNA           | 11 | 62432894  | 62433042  | SNORA57     |
| ENSG00000206601 | 0.499066092 | 0.390640832 | snRNA            | 4  | 109573306 | 109573412 |             |
| ENSG00000206602 | 1.960915222 | 2.652276565 | snoRNA           | 18 | 47017653  | 47017717  | SNORD58A    |
| ENSG00000206603 | 1.16343121  | 1.667587519 | snoRNA           | 7  | 56123058  | 56123195  |             |
| ENSG00000206604 | 0           | 0.390640832 | snRNA            | 3  | 141864296 | 141864397 |             |
| ENSG00000206613 | 0           | 0.390640832 | snRNA            | 4  | 169607759 | 169607867 |             |
| ENSG00000206622 | 0.869158192 | 1.925536307 | snoRNA           | X  | 118921316 | 118921447 | SNORA69     |
| ENSG00000206630 | 2.57521082  | 4.508954154 | snoRNA           | 16 | 2205024   | 2205106   | SNORD60     |
| ENSG00000206633 | 2.671945279 | 0.390640832 | snoRNA           | 2  | 10586840  | 10586975  | SNORA80B    |
| ENSG00000206634 | 1.16343121  | 0.390640832 | snoRNA           | 7  | 65220513  | 65220646  | SNORA22     |
| ENSG00000206635 | 0           | 0.390640832 | snRNA            | 1  | 151601800 | 151601906 |             |
| ENSG00000206645 | 0           | 0.390640832 | misc_RNA         | 3  | 37134624  | 37134725  |             |
| ENSG00000206647 | 1.407729925 | 0.697730409 | snoRNA           | 2  | 10295199  | 10295333  |             |
| ENSG00000206650 | 0           | 0.950786998 | snoRNA           | 12 | 69021014  | 69021155  | SNORA70G    |
| ENSG00000206651 | 0           | 0.390640832 | misc_RNA         | 1  | 156453890 | 156454002 |             |
| ENSG00000206652 | 0.499066092 |             | 0 snRNA          | 1  | 16840617  | 16840780  | RNU1-1      |
| ENSG00000206660 | 0.499066092 |             | 0 misc_RNA       | 10 | 32345674  | 32345767  |             |
| ENSG00000206663 | 0.499066092 |             | 0 misc_RNA       | X  | 20003176  | 20003277  |             |
| ENSG00000206669 | 0           | 0.390640832 | misc_RNA         | 19 | 37349129  | 37349231  |             |
| ENSG00000206675 | 0           | 0.390640832 | snRNA            | 4  | 39299225  | 39299331  |             |
| ENSG00000206682 | 0.869158192 | 0.390640832 | misc_RNA         | 5  | 31505791  | 31505895  |             |
| ENSG00000206688 | 0.499066092 |             | 0 snoRNA         | 15 | 25330532  | 25330623  | SNORD116-18 |
| ENSG00000206698 | 0           | 0.697730409 | snRNA            | 5  | 96511654  | 96511817  |             |
| ENSG00000206712 | 0           | 0.950786998 | snRNA            | 3  | 98523822  | 98523928  |             |
| ENSG00000206713 | 0           | 0.390640832 | misc_RNA         | 17 | 73085957  | 73086069  |             |
| ENSG00000206715 | 0           | 0.390640832 | snRNA            | 6  | 88198163  | 88198270  |             |
| ENSG00000206728 | 0.499066092 | 0.950786998 | misc_RNA         | 3  | 23315298  | 23315401  |             |
| ENSG00000206731 | 0.869158192 | 0.390640832 | snoRNA           | 2  | 27864910  | 27865036  |             |
| ENSG00000206739 | 0           | 0.390640832 | misc_RNA         | 22 | 19032769  | 19032880  |             |
| ENSG00000206747 | 0.499066092 |             | 0 snRNA          | X  | 67759285  | 67759391  |             |
| ENSG00000206751 | 0.499066092 |             | 0 misc_RNA       | 14 | 73319932  | 73320039  |             |
| ENSG00000206754 | 2.671945279 | 3.570966319 | snoRNA           | 6  | 133136446 | 133136518 | SNORD101    |
| ENSG00000206755 | 0           | 0.950786998 | snoRNA           | 16 | 30721858  | 30721986  | SNORA30     |
| ENSG00000206762 | 0.499066092 | 1.16600992  | snRNA            | 1  | 205564169 | 205564275 |             |
| ENSG00000206763 | 0.499066092 |             | 0 snRNA          | 7  | 92331022  | 92331128  |             |
| ENSG00000206768 | 0           | 0.390640832 | misc_RNA         | 14 | 69610569  | 69610670  |             |
| ENSG00000206775 | 1.616589159 | 2.334191469 | snoRNA           | 19 | 3982505   | 3982570   | SNORD37     |
| ENSG00000206781 | 0.499066092 |             | 0 misc_RNA       | 15 | 64737329  | 64737442  |             |
| ENSG00000206790 | 0.499066092 | 0.390640832 | misc_RNA         | 12 | 100651466 | 100651568 |             |
| ENSG00000206813 | 0           | 0.390640832 | misc_RNA         | 22 | 42143316  | 42143417  |             |
| ENSG00000206815 | 0           | 0.390640832 | snRNA            | 3  | 57534565  | 57534672  |             |
| ENSG00000206816 | 0.869158192 | 0.697730409 | misc_RNA         | 11 | 77402695  | 77402796  |             |
| ENSG00000206820 | 0           | 0.390640832 | snRNA            | 4  | 114341479 | 114341642 |             |
| ENSG00000206822 | 0.869158192 | 0.390640832 | misc_RNA         | 14 | 64088478  | 64088589  |             |
| ENSG00000206823 | 2.471521042 | 3.845183986 | snoRNA           | 4  | 119200345 | 119200475 | SNORA24     |
| ENSG00000206824 | 0           | 0.390640832 | misc_RNA         | 17 | 48463506  | 48463607  |             |
| ENSG00000206830 | 0.499066092 | 0.390640832 | snRNA            | 12 | 51407917  | 51408024  |             |
| ENSG00000206836 | 0           | 0.390640832 | snRNA            | 2  | 198312469 | 198312575 |             |
| ENSG00000206838 | 2.238690726 | 2.420525079 | snoRNA           | 7  | 45143948  | 45144081  | SNORA5A     |
| ENSG00000206846 | 0.499066092 |             | 0 misc_RNA       | 15 | 30965953  | 30966046  |             |
| ENSG00000206847 | 0           | 0.390640832 | misc_RNA         | 11 | 128900354 | 128900467 |             |
| ENSG00000206848 | 0.499066092 |             | 0 snRNA          | 6  | 42631900  | 42632006  |             |
| ENSG00000206859 | 0           | 0.390640832 | snRNA            | 17 | 17073397  | 17073503  |             |
| ENSG00000206878 | 1.799000381 | 2.851901313 | snoRNA           | 1  | 228788183 | 228788307 |             |
| ENSG00000206881 | 1.16343121  |             | 0 snRNA          | 6  | 17619764  | 17619865  |             |
| ENSG00000206885 | 1.960915222 | 2.039052734 | snoRNA           | 2  | 232320511 | 232320647 | SNORA75     |
| ENSG00000206892 | 0           | 0.390640832 | snRNA            | 3  | 196511851 | 196511957 | RNU6-42     |

|                 |             |             |          |    |           |                      |
|-----------------|-------------|-------------|----------|----|-----------|----------------------|
| ENSG00000206895 | 0.869158192 | 0           | misc_RNA | 7  | 4850819   | 4850920              |
| ENSG00000206897 | 2.10647801  | 0.697730409 | snoRNA   | 12 | 124101255 | 124101387            |
| ENSG00000206913 | 1.407729925 | 0.950786998 | snoRNA   | 11 | 73963459  | 73963597             |
| ENSG00000206914 | 0           | 0.390640832 | misc_RNA | 12 | 123252646 | 123252747            |
| ENSG00000206921 | 0           | 0.697730409 | snRNA    | 1  | 161371079 | 161371185            |
| ENSG00000206924 | 0.499066092 | 0.390640832 | snRNA    | 14 | 75487464  | 75487570             |
| ENSG00000206926 | 0           | 0.390640832 | snRNA    | 3  | 15474617  | 15474723             |
| ENSG00000206931 | 0.499066092 | 0.697730409 | snRNA    | 1  | 150674342 | 150674448            |
| ENSG00000206936 | 0.499066092 | 0.950786998 | snRNA    | X  | 48939686  | 48939823             |
| ENSG00000206938 | 0.499066092 | 0           | snRNA    | 7  | 156664772 | 156664912            |
| ENSG00000206941 | 0           | 0.390640832 | snoRNA   | 11 | 75111435  | 75111582 SNORD15A    |
| ENSG00000206942 | 3.274897671 | 3.781359661 | snoRNA   | 7  | 45024977  | 45025109 SNORA9      |
| ENSG00000206952 | 0.499066092 | 0           | snoRNA   | 16 | 58593700  | 58593833 SNORA50     |
| ENSG00000206967 | 0           | 0.390640832 | misc_RNA | 11 | 108100230 | 108100331            |
| ENSG00000206989 | 0.499066092 | 0.697730409 | snoRNA   | 5  | 137896732 | 137896799 SNORD63    |
| ENSG00000206991 | 0.869158192 | 0           | snRNA    | 15 | 43929830  | 43929936             |
| ENSG00000206992 | 0           | 0.950786998 | snRNA    | 12 | 52381441  | 52381547             |
| ENSG00000207001 | 0           | 0.697730409 | snoRNA   | 15 | 25299357  | 25299451 SNORD116-2  |
| ENSG00000207003 | 0.499066092 | 1.667587519 | snRNA    | 19 | 45550716  | 45550819             |
| ENSG00000207004 | 0.499066092 | 0.697730409 | snRNA    | 14 | 52190821  | 52190927             |
| ENSG00000207008 | 0.869158192 | 0.390640832 | snoRNA   | 11 | 2985001   | 2985123 SNORA54      |
| ENSG00000207009 | 0.499066092 | 0           | misc_RNA | 4  | 1685147   | 1685256              |
| ENSG00000207011 | 0           | 0.390640832 | misc_RNA | 17 | 28386070  | 28386165 RNY4P13     |
| ENSG00000207014 | 0           | 0.390640832 | snoRNA   | 15 | 25302007  | 25302101 SNORD116-3  |
| ENSG00000207021 | 0           | 0.390640832 | misc_RNA | 17 | 79540516  | 79540628             |
| ENSG00000207031 | 1.16343121  | 2.652276565 | snoRNA   | 12 | 57038811  | 57038885 SNORD59A    |
| ENSG00000207033 | 0.499066092 | 0           | snRNA    | X  | 115532008 | 115532113            |
| ENSG00000207034 | 0           | 0.390640832 | misc_RNA | 18 | 2778939   | 2779055              |
| ENSG00000207037 | 0.499066092 | 0           | snRNA    | 15 | 85481647  | 85481753             |
| ENSG00000207047 | 1.799000381 | 2.242360793 | snoRNA   | 2  | 207026605 | 207026678 SNORD51    |
| ENSG00000207063 | 0.499066092 | 0           | snoRNA   | 15 | 25296624  | 25296718 SNORD116-1  |
| ENSG00000207081 | 0.499066092 | 0           | snRNA    | X  | 134052340 | 134052446            |
| ENSG00000207083 | 0           | 0.390640832 | snRNA    | 16 | 69209574  | 69209680             |
| ENSG00000207086 | 0           | 0.390640832 | misc_RNA | 2  | 9755396   | 9755502              |
| ENSG00000207087 | 0           | 0.390640832 | snRNA    | 2  | 43318526  | 43318632             |
| ENSG00000207088 | 0.869158192 | 0.390640832 | snoRNA   | 3  | 129116053 | 129116191 SNORA7B    |
| ENSG00000207093 | 0.499066092 | 0           | snoRNA   | 15 | 25315579  | 25315673 SNORD116-8  |
| ENSG00000207109 | 0           | 0.390640832 | snoRNA   | 3  | 53367087  | 53367155             |
| ENSG00000207110 | 5.707331524 | 5.42565083  | snRNA    | 8  | 129011377 | 129011540            |
| ENSG00000207129 | 0.499066092 | 0.697730409 | rRNA     | 5  | 87570075  | 87570193 RN5S187     |
| ENSG00000207133 | 0           | 0.390640832 | snoRNA   | 15 | 25312935  | 25313029 SNORD116-7  |
| ENSG00000207137 | 0.499066092 | 0           | snoRNA   | 15 | 25324205  | 25324296 SNORD116-13 |
| ENSG00000207146 | 0.869158192 | 0.390640832 | misc_RNA | X  | 107920181 | 107920287            |
| ENSG00000207151 | 0           | 0.697730409 | misc_RNA | X  | 11134212  | 11134313             |
| ENSG00000207158 | 0.499066092 | 0           | snRNA    | 20 | 55361037  | 55361143             |
| ENSG00000207166 | 3.274897671 | 3.781359661 | snoRNA   | 19 | 17973397  | 17973529 SNORA68     |
| ENSG00000207168 | 0.869158192 | 0.950786998 | snoRNA   | 7  | 56128163  | 56128295 SNORA15     |
| ENSG00000207171 | 0           | 0.950786998 | snoRNA   | 4  | 169392560 | 169392690            |
| ENSG00000207175 | 0.499066092 | 0.390640832 | snRNA    | X  | 118557705 | 118557868            |
| ENSG00000207181 | 1.616589159 | 1.925536307 | snoRNA   | 1  | 235291118 | 235291252 SNORA14B   |
| ENSG00000207186 | 0           | 0.390640832 | rRNA     | 2  | 242524383 | 242524490 RN5S122    |
| ENSG00000207189 | 0           | 0.390640832 | misc_RNA | 12 | 123833546 | 123833647            |
| ENSG00000207190 | 0           | 0.390640832 | snRNA    | 1  | 64494566  | 64494672             |
| ENSG00000207191 | 0.499066092 | 0           | snoRNA   | 15 | 25307480  | 25307574 SNORD116-5  |
| ENSG00000207200 | 1.799000381 | 1.16600992  | snRNA    | 11 | 63737942  | 63738048             |
| ENSG00000207203 | 0           | 0.390640832 | snRNA    | 13 | 36841305  | 36841411 RNU6-71     |
| ENSG00000207205 | 0.499066092 | 0.390640832 | snRNA    | 1  | 148604908 | 148605072            |
| ENSG00000207209 | 0           | 0.390640832 | misc_RNA | 1  | 146891926 | 146892027            |
| ENSG00000207217 | 0.499066092 | 0           | snoRNA   | 7  | 6056508   | 6056642              |
| ENSG00000207221 | 0.499066092 | 0           | snoRNA   | 11 | 82752506  | 82752640 SNORA70E    |
| ENSG00000207233 | 0.499066092 | 0.697730409 | snoRNA   | 18 | 51748654  | 51748782 SNORA37     |
| ENSG00000207234 | 0           | 0.697730409 | snRNA    | 1  | 89282462  | 89282568             |
| ENSG00000207237 | 0.869158192 | 0           | snRNA    | 1  | 26290688  | 26290791             |

|                 |             |             |          |    |           |           |             |
|-----------------|-------------|-------------|----------|----|-----------|-----------|-------------|
| ENSG00000207243 | 0.499066092 | 0           | misc_RNA | 16 | 228553    | 228655    |             |
| ENSG00000207245 | 0.499066092 | 0.390640832 | snoRNA   | 15 | 25351668  | 25351750  | SNORD116-29 |
| ENSG00000207256 | 0           | 0.390640832 | snRNA    | 1  | 43457109  | 43457215  |             |
| ENSG00000207266 | 0           | 0.390640832 | snRNA    | 16 | 28009616  | 28009722  |             |
| ENSG00000207277 | 0.499066092 | 0.390640832 | rRNA     | 9  | 68408924  | 68409041  |             |
| ENSG00000207279 | 0.499066092 | 0           | snoRNA   | 15 | 25339184  | 25339275  | SNORD116-24 |
| ENSG00000207280 | 2.238690726 | 1.518964905 | snoRNA   | 2  | 232321155 | 232321234 | SNORD20     |
| ENSG00000207292 | 0.499066092 | 0           | misc_RNA | 6  | 149952573 | 149952685 |             |
| ENSG00000207293 | 0.869158192 | 0           | misc_RNA | 5  | 56464935  | 56465036  |             |
| ENSG00000207297 | 0.499066092 | 0.697730409 | snoRNA   | 17 | 33900676  | 33900772  | SNORD7      |
| ENSG00000207313 | 1.16343121  | 0.390640832 | snoRNA   | 12 | 49061240  | 49061376  | SNORA2B     |
| ENSG00000207315 | 0.499066092 | 1.353254395 | snoRNA   | 14 | 103804186 | 103804311 | SNORA28     |
| ENSG00000207327 | 0           | 0.697730409 | snRNA    | 10 | 75288809  | 75288915  |             |
| ENSG00000207331 | 0           | 0.697730409 | snRNA    | 3  | 98627303  | 98627408  |             |
| ENSG00000207336 | 0.499066092 | 0.390640832 | snRNA    | 5  | 74020924  | 74021029  |             |
| ENSG00000207342 | 1.616589159 | 0.697730409 | misc_RNA | 14 | 89306509  | 89306607  |             |
| ENSG00000207344 | 0.869158192 | 0           | snoRNA   | 7  | 64526377  | 64526510  |             |
| ENSG00000207357 | 0.869158192 | 0.390640832 | snRNA    | 19 | 1021521   | 1021627   |             |
| ENSG00000207359 | 2.57521082  | 0.390640832 | snRNA    | 8  | 90912949  | 90913052  |             |
| ENSG00000207363 | 0           | 0.390640832 | misc_RNA | X  | 107144375 | 107144476 |             |
| ENSG00000207375 | 0.499066092 | 0           | snoRNA   | 15 | 25336933  | 25337024  | SNORD116-23 |
| ENSG00000207380 | 0           | 0.390640832 | misc_RNA | 20 | 5945184   | 5945296   |             |
| ENSG00000207382 | 0.499066092 | 0           | misc_RNA | 17 | 60738982  | 60739086  |             |
| ENSG00000207383 | 1.616589159 | 1.802319292 | misc_RNA | 2  | 113337061 | 113337161 |             |
| ENSG00000207392 | 0           | 1.667587519 | snoRNA   | 6  | 160201282 | 160201413 | SNORA20     |
| ENSG00000207399 | 0.499066092 | 1.16600992  | snRNA    | 8  | 104397189 | 104397295 |             |
| ENSG00000207424 | 2.762599152 | 3.935919592 | snoRNA   | 11 | 62621135  | 62621204  | SNORD30     |
| ENSG00000207425 | 2.762599152 | 2.039052734 | misc_RNA | 16 | 15009314  | 15009413  |             |
| ENSG00000207426 | 0.499066092 | 0           | misc_RNA | X  | 95956506  | 95956618  |             |
| ENSG00000207427 | 0.869158192 | 1.667587519 | snoRNA   | 20 | 2635713   | 2635844   | SNORA51     |
| ENSG00000207442 | 0           | 0.697730409 | snoRNA   | 15 | 25310173  | 25310268  | SNORD116-6  |
| ENSG00000207445 | 3.744048221 | 3.368666104 | snoRNA   | 11 | 75115465  | 75115610  | SNORD15B    |
| ENSG00000207447 | 0.499066092 | 0           | snRNA    | 10 | 13259269  | 13259375  | RNU6-2      |
| ENSG00000207450 | 0           | 0.390640832 | misc_RNA | 8  | 48717640  | 48717740  |             |
| ENSG00000207451 | 0.499066092 | 0           | snRNA    | 1  | 11286311  | 11286417  |             |
| ENSG00000207457 | 1.799000381 | 1.16600992  | snRNA    | 22 | 42075715  | 42075821  |             |
| ENSG00000207460 | 0           | 0.390640832 | snoRNA   | 15 | 25331674  | 25331765  | SNORD116-19 |
| ENSG00000207464 | 1.16343121  | 0           | snoRNA   | 15 | 25304685  | 25304780  | SNORD116-4  |
| ENSG00000207475 | 1.799000381 | 1.353254395 | snoRNA   | 1  | 155889700 | 155889836 | SNORA42     |
| ENSG00000207493 | 0           | 0.697730409 | snoRNA   | 16 | 58582403  | 58582537  | SNORA46     |
| ENSG00000207494 | 0           | 0.390640832 | misc_RNA | 10 | 126503527 | 126503631 |             |
| ENSG00000207498 | 0           | 0.390640832 | snRNA    | 15 | 50639620  | 50639726  |             |
| ENSG00000207501 | 1.799000381 | 0.950786998 | snRNA    | 1  | 148241465 | 148241628 |             |
| ENSG00000207514 | 0           | 0.390640832 | snRNA    | 16 | 72410603  | 72410659  |             |
| ENSG00000207523 | 1.960915222 | 2.912743273 | snoRNA   | 1  | 93306276  | 93306408  | SNORA66     |
| ENSG00000207525 | 1.616589159 | 0.697730409 | misc_RNA | 16 | 74497786  | 74497886  |             |
| ENSG00000207546 | 0           | 0.390640832 | miRNA    | 12 | 65016289  | 65016385  | MIR548C     |
| ENSG00000207547 | 3.335220907 | 3.411459265 | miRNA    | 7  | 99691183  | 99691266  | MIR25       |
| ENSG00000207550 | 0           | 0.390640832 | miRNA    | 19 | 52195865  | 52195934  | MIR99B      |
| ENSG00000207554 | 3.211941663 | 2.971122874 | miRNA    | 20 | 62573984  | 62574079  | MIR647      |
| ENSG00000207556 | 0.869158192 | 2.242360793 | miRNA    | 17 | 74732532  | 74732630  | MIR636      |
| ENSG00000207561 | 1.960915222 | 2.334191469 | miRNA    | 17 | 66420592  | 66420689  | MIR635      |
| ENSG00000207563 | 0.499066092 | 0           | miRNA    | 9  | 97847490  | 97847586  | MIR23B      |
| ENSG00000207574 | 0           | 0.697730409 | miRNA    | 8  | 145019359 | 145019447 | MIR661      |
| ENSG00000207588 | 0           | 0.390640832 | miRNA    | 7  | 127721913 | 127722012 | MIR593      |
| ENSG00000207590 | 0.499066092 | 0.390640832 | miRNA    | 1  | 220291195 | 220291304 | MIR215      |
| ENSG00000207606 | 0.499066092 | 0           | miRNA    | 1  | 151518272 | 151518367 | MIR554      |
| ENSG00000207607 | 1.16343121  | 0.390640832 | miRNA    | 1  | 1103243   | 1103332   | MIR200A     |
| ENSG00000207611 | 0           | 0.390640832 | miRNA    | 2  | 241395418 | 241395506 | MIR149      |
| ENSG00000207612 | 0           | 0.390640832 | miRNA    | 10 | 29833933  | 29834026  | MIR604      |
| ENSG00000207614 | 1.407729925 | 0.697730409 | miRNA    | 17 | 29887015  | 29887102  | MIR193A     |
| ENSG00000207618 | 0.499066092 | 0           | miRNA    | 17 | 27188551  | 27188636  | MIR144      |
| ENSG00000207622 | 0.499066092 | 0.390640832 | miRNA    | 12 | 109230684 | 109230782 | MIR619      |

|                 |             |             |       |    |           |           |          |
|-----------------|-------------|-------------|-------|----|-----------|-----------|----------|
| ENSG00000207623 | 1.16343121  | 0           | miRNA | 1  | 209605478 | 209605587 | MIR205   |
| ENSG00000207624 | 0.499066092 | 0           | miRNA | 1  | 220291499 | 220291583 | MIR194-1 |
| ENSG00000207626 | 0           | 0.390640832 | miRNA | 2  | 233037363 | 233037457 | MIR562   |
| ENSG00000207627 | 0           | 0.390640832 | miRNA | 5  | 53247334  | 53247429  | MIR581   |
| ENSG00000207631 | 1.16343121  | 1.518964905 | miRNA | 19 | 40788450  | 40788548  | MIR641   |
| ENSG00000207635 | 0.499066092 | 1.353254395 | miRNA | 20 | 33578179  | 33578300  | MIR499A  |
| ENSG00000207643 | 0           | 0.950786998 | miRNA | 4  | 65017     | 65125     |          |
| ENSG00000207648 | 0.499066092 | 0.390640832 | miRNA | 11 | 64658609  | 64658718  | MIR192   |
| ENSG00000207650 | 2.847891871 | 2.652276565 | miRNA | 3  | 195426272 | 195426368 | MIR570   |
| ENSG00000207652 | 3.652182994 | 2.912743273 | miRNA | 13 | 41384902  | 41384997  | MIR621   |
| ENSG00000207653 | 0.499066092 | 0           | miRNA | 2  | 32757220  | 32757313  | MIR558   |
| ENSG00000207693 | 0           | 0.390640832 | miRNA | 9  | 140732871 | 140732968 | MIR602   |
| ENSG00000207696 | 0.499066092 | 0.390640832 | miRNA | 22 | 38243685  | 38243781  | MIR659   |
| ENSG00000207697 | 1.407729925 | 0.950786998 | miRNA | 4  | 24521815  | 24521913  | MIR573   |
| ENSG00000207698 | 0           | 0.390640832 | miRNA | 9  | 111808509 | 111808578 | MIR32    |
| ENSG00000207704 | 0.869158192 | 1.16600992  | miRNA | 8  | 124360274 | 124360370 | MIR548D1 |
| ENSG00000207709 | 1.16343121  | 0.950786998 | miRNA | 1  | 110141513 | 110141593 | MIR197   |
| ENSG00000207719 | 0.499066092 | 0           | miRNA | 13 | 100008385 | 100008482 | MIR623   |
| ENSG00000207721 | 1.407729925 | 2.039052734 | miRNA | 1  | 71533314  | 71533399  | MIR186   |
| ENSG00000207725 | 0.869158192 | 0           | miRNA | X  | 45606421  | 45606530  | MIR222   |
| ENSG00000207730 | 1.16343121  | 0           | miRNA | 1  | 1102484   | 1102578   | MIR200B  |
| ENSG00000207733 | 3.871730003 | 3.368666104 | miRNA | 19 | 3961412   | 3961510   | MIR637   |
| ENSG00000207737 | 0.499066092 | 0.390640832 | miRNA | 9  | 127455989 | 127456077 | MIR181B2 |
| ENSG00000207741 | 1.407729925 | 2.501982735 | miRNA | 7  | 73605528  | 73605624  | MIR590   |
| ENSG00000207750 | 0           | 0.697730409 | miRNA | 1  | 100746797 | 100746864 | MIR553   |
| ENSG00000207752 | 0           | 0.950786998 | miRNA | 19 | 10928102  | 10928172  | MIR199A1 |
| ENSG00000207755 | 0           | 0.390640832 | miRNA | X  | 133674538 | 133674637 | MIR450A2 |
| ENSG00000207757 | 2.35979773  | 1.802319292 | miRNA | 7  | 99691391  | 99691470  | MIR93    |
| ENSG00000207770 | 1.16343121  | 1.667587519 | miRNA | 3  | 114035322 | 114035416 | MIR568   |
| ENSG00000207773 | 0           | 0.697730409 | miRNA | 19 | 46178186  | 46178282  | MIR642A  |
| ENSG00000207780 | 0.499066092 | 0           | miRNA | 22 | 18463634  | 18463727  | MIR648   |
| ENSG00000207787 | 0.499066092 | 0.697730409 | miRNA | X  | 53583184  | 53583302  | MIR98    |
| ENSG00000207789 | 0           | 0.697730409 | miRNA | 12 | 58218392  | 58218475  | MIR26A2  |
| ENSG00000207808 | 2.35979773  | 1.667587519 | miRNA | 19 | 13947254  | 13947331  | MIR27A   |
| ENSG00000207814 | 0.499066092 | 0           | miRNA | 9  | 123007257 | 123007328 | MIR147A  |
| ENSG00000207820 | 0.499066092 | 0           | miRNA | X  | 73506939  | 73507044  | MIR545   |
| ENSG00000207839 | 0.499066092 | 1.16600992  | miRNA | 17 | 17717150  | 17717245  | MIR33B   |
| ENSG00000207864 | 0           | 0.390640832 | miRNA | 9  | 97847727  | 97847823  | MIR27B   |
| ENSG00000207865 | 0.869158192 | 0.390640832 | miRNA | 1  | 9211727   | 9211836   | MIR34A   |
| ENSG00000207870 | 2.35979773  | 1.353254395 | miRNA | X  | 45605585  | 45605694  | MIR221   |
| ENSG00000207874 | 0           | 0.390640832 | miRNA | 11 | 28078362  | 28078457  | MIR610   |
| ENSG00000207929 | 0.499066092 | 0           | miRNA | 17 | 6920934   | 6921020   | MIR195   |
| ENSG00000207932 | 0.869158192 | 0           | miRNA | 22 | 42296948  | 42297016  | MIR33A   |
| ENSG00000207933 | 0.499066092 | 0.390640832 | miRNA | 1  | 156390133 | 156390221 | MIR9-1   |
| ENSG00000207944 | 0.499066092 | 0.390640832 | miRNA | 4  | 38869653  | 38869748  | MIR574   |
| ENSG00000207948 | 0           | 0.390640832 | miRNA | 16 | 67236224  | 67236298  | MIR328   |
| ENSG00000207949 | 0           | 0.390640832 | miRNA | 1  | 172107938 | 172108047 | MIR214   |
| ENSG00000207956 | 0           | 0.950786998 | miRNA | 5  | 32394484  | 32394581  | MIR579   |
| ENSG00000207964 | 0           | 0.697730409 | miRNA | 15 | 55665138  | 55665232  | MIR628   |
| ENSG00000207966 | 0.499066092 | 1.16600992  | miRNA | 1  | 207975197 | 207975284 | MIR29C   |
| ENSG00000207973 | 1.407729925 | 1.16600992  | miRNA | 7  | 5535450   | 5535548   | MIR589   |
| ENSG00000207975 | 0           | 0.390640832 | miRNA | 1  | 198828002 | 198828111 | MIR181B1 |
| ENSG00000207980 | 2.471521042 | 2.652276565 | miRNA | 19 | 13947401  | 13947473  | MIR23A   |
| ENSG00000207983 | 0           | 0.697730409 | miRNA | 12 | 12917583  | 12917677  | MIR613   |
| ENSG00000207985 | 6.693459083 | 8.302443832 | miRNA | 20 | 26188822  | 26188914  | MIR663A  |
| ENSG00000207991 | 0           | 0.390640832 | miRNA | 9  | 126164804 | 126164882 | MIR601   |
| ENSG00000207997 | 0           | 1.16600992  | miRNA | 20 | 33054130  | 33054223  | MIR644A  |
| ENSG00000208002 | 0           | 0.390640832 | miRNA | 19 | 52785050  | 52785146  | MIR643   |
| ENSG00000208005 | 1.16343121  | 0.950786998 | miRNA | X  | 133680358 | 133680428 | MIR503   |
| ENSG00000208008 | 0           | 0.390640832 | miRNA | 19 | 52196507  | 52196592  | MIR125A  |
| ENSG00000208011 | 0           | 0.950786998 | miRNA | 1  | 155164968 | 155165063 | MIR92B   |
| ENSG00000208018 | 0           | 0.390640832 | miRNA | 20 | 49202323  | 49202416  | MIR645   |
| ENSG00000208028 | 2.35979773  | 2.579085888 | miRNA | 12 | 57912946  | 57913042  | MIR616   |



|                 |             |             |                  |    |           |           |          |
|-----------------|-------------|-------------|------------------|----|-----------|-----------|----------|
| ENSG00000208036 | 1.407729925 | 1.802319292 | miRNA            | 7  | 99691616  | 99691697  | MIR106B  |
| ENSG00000208308 | 0           | 0.390640832 | snoRNA           | 2  | 135894198 | 135894325 |          |
| ENSG00000208310 | 1.16343121  | 2.652276565 | snoRNA           | 1  | 173836017 | 173836076 | SNORD75  |
| ENSG00000208317 | 3.448790144 | 3.748356452 | snoRNA           | 1  | 173834760 | 173834824 | SNORD78  |
| ENSG00000208506 | 0.869158192 | 0.697730409 | snRNA            | 2  | 122288457 | 122288583 | RNU4ATAC |
| ENSG00000208772 | 2.238690726 | 1.925536307 | snoRNA           | 2  | 86362993  | 86363129  | SNORD94  |
| ENSG00000208883 | 0           | 0.390640832 | snoRNA           | X  | 109468213 | 109468291 | SNORD96B |
| ENSG00000208892 | 0.499066092 | 0.697730409 | snoRNA           | 12 | 132515769 | 132515904 | SNORA49  |
| ENSG00000209042 | 3.744048221 | 2.579085888 | snoRNA           | 20 | 47895477  | 47895565  | SNORD12C |
| ENSG00000209082 | 7.834876234 | 7.040122572 | Mt_tRNA          | MT | 3230      | 3304      |          |
| ENSG00000209418 | 2.10647801  | 1.518964905 | snoRNA           | 15 | 25230247  | 25230313  | SNORD64  |
| ENSG00000209482 | 4.261916566 | 5.09905904  | snoRNA           | 22 | 39711218  | 39711312  | SNORD83A |
| ENSG00000209582 | 5.255381949 | 4.65855978  | snoRNA           | 17 | 7478031   | 7478165   | SNORA48  |
| ENSG00000209645 | 1.616589159 | 1.16600992  | snoRNA           | 19 | 10218327  | 10218411  | SNORD105 |
| ENSG00000209702 | 0.499066092 | 0.697730409 | snoRNA           | 19 | 12817263  | 12817332  | SNORD41  |
| ENSG00000209707 | 2.57521082  | 1.802319292 | miRNA            | 19 | 13947101  | 13947173  | MIR24-2  |
| ENSG00000209804 | 1.407729925 | 0.697730409 | snRNA            | 1  | 28975112  | 28975245  | RNU11    |
| ENSG00000210049 | 7.04004079  | 6.235021771 | Mt_tRNA          | MT | 577       | 647       |          |
| ENSG00000210077 | 6.041940478 | 5.372493443 | Mt_tRNA          | MT | 1602      | 1670      |          |
| ENSG00000210082 | 16.9430781  | 18.24466944 | Mt_rRNA          | MT | 1671      | 3229      | MIR4485  |
| ENSG00000210100 | 4.842525946 | 3.96493948  | Mt_tRNA          | MT | 4263      | 4331      |          |
| ENSG00000210112 | 2.847891871 | 2.652276565 | Mt_tRNA          | MT | 4402      | 4469      |          |
| ENSG00000210117 | 3.274897671 | 2.501982735 | Mt_tRNA          | MT | 5512      | 5579      |          |
| ENSG00000210140 | 9.061114416 | 8.936206949 | Mt_tRNA          | MT | 5761      | 5826      |          |
| ENSG00000210144 | 9.026088136 | 8.791837833 | Mt_tRNA          | MT | 5826      | 5891      |          |
| ENSG00000210154 | 0           | 0.950786998 | Mt_tRNA          | MT | 7518      | 7585      |          |
| ENSG00000210156 | 0.499066092 | 0.390640832 | Mt_tRNA          | MT | 8295      | 8364      |          |
| ENSG00000210164 | 4.883502971 | 4.826083323 | Mt_tRNA          | MT | 9991      | 10058     |          |
| ENSG00000210174 | 4.689181911 | 4.29708397  | Mt_tRNA          | MT | 10405     | 10469     |          |
| ENSG00000210176 | 5.239686603 | 4.94736961  | Mt_tRNA          | MT | 12138     | 12206     |          |
| ENSG00000210184 | 4.689181911 | 4.640685763 | Mt_tRNA          | MT | 12207     | 12265     |          |
| ENSG00000210191 | 5.538004898 | 5.271576845 | Mt_tRNA          | MT | 12266     | 12336     |          |
| ENSG00000210194 | 3.146112541 | 3.845183986 | Mt_tRNA          | MT | 14674     | 14742     |          |
| ENSG00000210195 | 4.593635215 | 3.714580548 | Mt_tRNA          | MT | 15888     | 15953     |          |
| ENSG00000210196 | 8.299696963 | 8.512355001 | Mt_tRNA          | MT | 15956     | 16023     |          |
| ENSG00000210841 | 0           | 0.390640832 | snRNA            | 3  | 57605174  | 57605299  |          |
| ENSG00000211445 | 6.515894502 | 5.583678991 | protein_coding   | 5  | 150400124 | 150408554 | GPX3     |
| ENSG00000211448 | 7.218789138 | 6.25865215  | protein_coding   | 14 | 80663873  | 80854100  | DIO2     |
| ENSG00000211450 | 7.726437377 | 8.302443832 | protein_coding   | 11 | 57508825  | 57510529  | C11orf31 |
| ENSG00000211451 | 3.004694206 | 2.912743273 | protein_coding   | 1  | 145509752 | 145516076 | GNRHR2   |
| ENSG00000211452 | 0.499066092 | 1.518964905 | protein_coding   | 1  | 54356912  | 54376759  | DIO1     |
| ENSG00000211454 | 3.871730003 | 3.845183986 | polymorphic_pse  | 1  | 19592478  | 19600688  | AKR7L    |
| ENSG00000211455 | 8.652173596 | 8.851330023 | protein_coding   | 12 | 27396901  | 27478892  | STK38L   |
| ENSG00000211456 | 8.146099194 | 8.548751381 | protein_coding   | 3  | 45730548  | 45786901  | SACM1L   |
| ENSG00000211459 | 13.55172566 | 15.27886679 | Mt_rRNA          | MT | 648       | 1601      |          |
| ENSG00000211460 | 9.789607412 | 9.190788227 | protein_coding   | 2  | 122494679 | 122525429 | TSN      |
| ENSG00000211482 | 0           | 1.518964905 | miRNA            | 4  | 403598    | 403704    |          |
| ENSG00000211513 | 1.407729925 | 0.390640832 | miRNA            | 19 | 47212541  | 47212607  | MIR320E  |
| ENSG00000211553 | 0.869158192 | 1.802319292 | miRNA            | 4  | 130242    | 130349    |          |
| ENSG00000211571 | 0           | 0.390640832 | miRNA            | 19 | 56196138  | 56196282  |          |
| ENSG00000211581 | 0           | 0.697730409 | miRNA            | 1  | 156905923 | 156906036 | MIR765   |
| ENSG00000211584 | 6.305850085 | 5.776071827 | protein_coding   | 12 | 48147699  | 48176536  | SLC48A1  |
| ENSG00000211643 | 0.499066092 | 0           | IG_V_gene        | 22 | 22673082  | 22673581  | IGLV5-52 |
| ENSG00000211644 | 2.238690726 | 2.039052734 | IG_V_gene        | 22 | 22676828  | 22677336  | IGLV1-51 |
| ENSG00000211683 | 2.10647801  | 1.925536307 | processed_transc | 22 | 23974071  | 23981128  |          |
| ENSG00000211714 | 0           | 0.390640832 | TR_V_gene        | 7  | 142247109 | 142247615 | TRBV7-3  |
| ENSG00000211772 | 0           | 0.390640832 | TR_C_gene        | 7  | 142498725 | 142500432 | TRBC2    |
| ENSG00000211843 | 0           | 0.390640832 | TR_J_gene        | 14 | 22962389  | 22962451  | TRAJ46   |
| ENSG00000211890 | 0.499066092 | 0           | IG_C_gene        | 14 | 106053226 | 106054732 | IGHA2    |
| ENSG00000212024 | 0           | 0.390640832 | miRNA            | 7  | 29720349  | 29720445  | MIR550A3 |
| ENSG00000212027 | 0           | 0.697730409 | miRNA            | X  | 73438382  | 73438453  | MIR374B  |
| ENSG00000212045 | 0           | 0.390640832 | miRNA            | 4  | 29751818  | 29751932  |          |
| ENSG00000212089 | 0           | 0.390640832 | miRNA            | 11 | 71789376  | 71789466  |          |

|                 |             |             |                |    |           |                    |
|-----------------|-------------|-------------|----------------|----|-----------|--------------------|
| ENSG00000212093 | 0           | 0.390640832 | miRNA          | 11 | 68273551  | 68273634           |
| ENSG00000212123 | 6.887241849 | 7.720473624 | protein_coding | 19 | 5782971   | 5784776 PRR22      |
| ENSG00000212124 | 0.869158192 | 1.353254395 | protein_coding | 12 | 11174218  | 11175219 TAS2R19   |
| ENSG00000212125 | 1.16343121  | 0.950786998 | pseudogene     | 12 | 11117024  | 11117951 TAS2R15   |
| ENSG00000212126 | 0.499066092 | 0.390640832 | protein_coding | 12 | 11138512  | 11139511 TAS2R50   |
| ENSG00000212127 | 4.230497448 | 3.96493948  | protein_coding | 12 | 11090005  | 11324172 TAS2R14   |
| ENSG00000212128 | 0.499066092 | 0.390640832 | protein_coding | 12 | 11060525  | 11062161 TAS2R13   |
| ENSG00000212135 | 0.499066092 | 1.353254395 | snoRNA         | 11 | 46783939  | 46784049 SNORD67   |
| ENSG00000212138 | 0           | 0.697730409 | rRNA           | 12 | 109497791 | 109497905          |
| ENSG00000212144 | 0           | 0.390640832 | snoRNA         | 1  | 234729021 | 234729148          |
| ENSG00000212158 | 0           | 0.390640832 | snoRNA         | 3  | 184043484 | 184043559 SNORD66  |
| ENSG00000212163 | 0           | 0.950786998 | snoRNA         | 17 | 2233570   | 2233664 SNORD91A   |
| ENSG00000212175 | 0.499066092 | 0           | snoRNA         | 2  | 55792839  | 55792986           |
| ENSG00000212195 | 0.869158192 | 1.353254395 | snoRNA         | 17 | 56709003  | 56709197           |
| ENSG00000212232 | 3.274897671 | 3.453019579 | snoRNA         | 20 | 17943353  | 17943589 SNORD17   |
| ENSG00000212237 | 2.671945279 | 3.32456471  | rRNA           | 1  | 228783659 | 228783779 RN5S18   |
| ENSG00000212240 | 0           | 1.16600992  | snRNA          | 6  | 28883422  | 28883521           |
| ENSG00000212242 | 0.499066092 | 0.697730409 | rRNA           | 6  | 136951381 | 136951493 RN5S219  |
| ENSG00000212257 | 0.499066092 | 0           | snRNA          | 1  | 65488651  | 65488757           |
| ENSG00000212264 | 0           | 0.390640832 | snoRNA         | 7  | 23436065  | 23436135           |
| ENSG00000212283 | 2.10647801  | 1.16600992  | snoRNA         | 2  | 101889398 | 101889511 SNORD89  |
| ENSG00000212296 | 1.407729925 | 2.334191469 | snoRNA         | 5  | 40832758  | 40832837 SNORD72   |
| ENSG00000212300 | 1.16343121  | 1.353254395 | snoRNA         | 4  | 159621843 | 159622060          |
| ENSG00000212302 | 0           | 0.390640832 | snoRNA         | 14 | 23225970  | 23226038           |
| ENSG00000212304 | 3.744048221 | 3.64455972  | snoRNA         | 20 | 47897220  | 47897309 SNORD12   |
| ENSG00000212309 | 1.16343121  | 0.390640832 | snoRNA         | 2  | 203142831 | 203142915          |
| ENSG00000212327 | 0           | 0.390640832 | snRNA          | 3  | 9960735   | 9960837            |
| ENSG00000212332 | 0.499066092 | 0           | snRNA          | 10 | 88248203  | 88248306           |
| ENSG00000212335 | 0.869158192 | 0.390640832 | misc_RNA       | 14 | 23321825  | 23321937           |
| ENSG00000212342 | 0           | 0.697730409 | snoRNA         | 8  | 131175218 | 131175373          |
| ENSG00000212371 | 1.407729925 | 2.652276565 | snoRNA         | 14 | 77932627  | 77932779           |
| ENSG00000212385 | 0.499066092 | 0.697730409 | snRNA          | 1  | 116956388 | 116956491          |
| ENSG00000212391 | 0           | 0.390640832 | snoRNA         | 2  | 227833705 | 227833838          |
| ENSG00000212396 | 0.499066092 | 1.802319292 | rRNA           | 10 | 95270305  | 95270437           |
| ENSG00000212402 | 0           | 0.950786998 | snoRNA         | 5  | 172447731 | 172447931 SNORA74B |
| ENSG00000212411 | 0           | 0.390640832 | snoRNA         | 10 | 29864235  | 29864310           |
| ENSG00000212418 | 0           | 0.697730409 | misc_RNA       | 17 | 74699714  | 74699809           |
| ENSG00000212432 | 0.499066092 | 0           | snoRNA         | 12 | 9597654   | 9597801            |
| ENSG00000212443 | 1.616589159 | 1.667587519 | snoRNA         | 12 | 98993413  | 98993661 SNORA53   |
| ENSG00000212445 | 0.499066092 | 0.390640832 | snoRNA         | 16 | 68223190  | 68223324           |
| ENSG00000212452 | 2.762599152 | 2.334191469 | snoRNA         | 3  | 52726752  | 52726828 SNORD69   |
| ENSG00000212456 | 0           | 0.390640832 | snRNA          | 1  | 147994146 | 147994313          |
| ENSG00000212458 | 0.499066092 | 1.16600992  | snoRNA         | 4  | 1112672   | 1112801            |
| ENSG00000212461 | 0           | 0.390640832 | snoRNA         | 12 | 72033135  | 72033263           |
| ENSG00000212464 | 0.869158192 | 0.697730409 | snoRNA         | 10 | 101996913 | 101997059 SNORA12  |
| ENSG00000212469 | 0           | 0.390640832 | snRNA          | 17 | 54948531  | 54948637           |
| ENSG00000212493 | 0.499066092 | 1.802319292 | snoRNA         | 3  | 52723264  | 52723331 SNORD19   |
| ENSG00000212497 | 1.407729925 | 0.390640832 | rRNA           | 19 | 12138728  | 12138836           |
| ENSG00000212517 | 0.499066092 | 0.390640832 | snoRNA         | 20 | 5102063   | 5102185            |
| ENSG00000212533 | 1.16343121  | 0.697730409 | snoRNA         | 12 | 31229801  | 31229950           |
| ENSG00000212534 | 1.616589159 | 0.390640832 | snRNA          | 2  | 203141154 | 203141241 SNORD70  |
| ENSG00000212536 | 0.869158192 | 0.697730409 | rRNA           | 20 | 5079033   | 5079122            |
| ENSG00000212541 | 0           | 1.16600992  | snRNA          | 1  | 38457134  | 38457241           |
| ENSG00000212544 | 0.499066092 | 0           | snRNA          | 1  | 149514090 | 149514256          |
| ENSG00000212549 | 0           | 0.390640832 | rRNA           | 12 | 26526531  | 26526666           |
| ENSG00000212552 | 2.10647801  | 0.697730409 | snoRNA         | 17 | 2232413   | 2232507 SNORD91B   |
| ENSG00000212559 | 0.499066092 | 0           | rRNA           | 13 | 94677724  | 94677852 RN5S35    |
| ENSG00000212569 | 0.499066092 | 0           | misc_RNA       | 22 | 51108232  | 51108329           |
| ENSG00000212576 | 0.869158192 | 0.697730409 | rRNA           | 19 | 12217312  | 12217429           |
| ENSG00000212579 | 0           | 0.390640832 | snoRNA         | 6  | 35619595  | 35619722           |
| ENSG00000212588 | 2.35979773  | 2.912743273 | snoRNA         | 4  | 53579416  | 53579537 SNORA26   |
| ENSG00000212593 | 0           | 0.390640832 | snoRNA         | 16 | 23453162  | 23453242           |
| ENSG00000212607 | 2.35979773  | 3.608232228 | snoRNA         | 11 | 8706986   | 8707116 SNORA45    |

|                 |             |             |                  |    |           |                      |
|-----------------|-------------|-------------|------------------|----|-----------|----------------------|
| ENSG00000212615 | 0           | 0.697730409 | snoRNA           | 14 | 45557446  | 45557511             |
| ENSG00000212624 | 0           | 0.390640832 | snoRNA           | 1  | 52190447  | 52190568             |
| ENSG00000212664 | 1.407729925 | 1.925536307 | pseudogene       | 15 | 71633466  | 71634086             |
| ENSG00000212670 | 2.928422289 | 3.232099092 | protein_coding   | 1  | 54569968  | 54571750             |
| ENSG00000212673 | 1.16343121  | 2.652276565 | protein_coding   | 1  | 32379174  | 32380745             |
| ENSG00000212694 | 6.103936836 | 6.064512706 | lincRNA          | 12 | 122233173 | 122241812            |
| ENSG00000212695 | 2.10647801  | 2.420525079 | pseudogene       | 9  | 87133311  | 8713841              |
| ENSG00000212719 | 9.706408721 | 10.42379484 | protein_coding   | 17 | 21428051  | 21477781 C17orf51    |
| ENSG00000212724 | 3.393122761 | 0.390640832 | protein_coding   | 17 | 39215495  | 39216344 KRTAP2-3    |
| ENSG00000212743 | 1.960915222 | 1.16600992  | protein_coding   | 10 | 6392278   | 6394723              |
| ENSG00000212747 | 8.215945216 | 8.283850589 | protein_coding   | X  | 134154543 | 134156559 FAM127C    |
| ENSG00000212766 | 1.407729925 | 1.16600992  | processed_transc | 15 | 69365266  | 69388148 LINC00277   |
| ENSG00000212769 | 0.499066092 | 0.390640832 | pseudogene       | 10 | 85841185  | 85842572 HMGN2P8     |
| ENSG00000212789 | 1.799000381 | 0.950786998 | pseudogene       | 11 | 18283529  | 18284638 ST13P5      |
| ENSG00000212802 | 3.077135474 | 3.279072565 | pseudogene       | 6  | 12514342  | 12515006 RPL15P3     |
| ENSG00000212829 | 3.004694206 | 3.133298822 | pseudogene       | 9  | 9090874   | 9091323 RPS26P3      |
| ENSG00000212864 | 4.381167248 | 4.888000647 | protein_coding   | 9  | 140114707 | 140116033 RNF208     |
| ENSG00000212907 | 14.31421674 | 13.50597938 | protein_coding   | MT | 10470     | 10766 MT-ND4L        |
| ENSG00000212916 | 5.054730169 | 4.777836593 | protein_coding   | 1  | 232940643 | 232946092 KIAA1383   |
| ENSG00000212951 | 0.869158192 | 0.950786998 | pseudogene       | 9  | 46842616  | 46844326             |
| ENSG00000212961 | 0           | 1.16600992  | pseudogene       | 11 | 74065488  | 74066765             |
| ENSG00000212978 | 7.119373418 | 7.145279744 | processed_transc | 2  | 61368732  | 61372104             |
| ENSG00000212993 | 2.35979773  | 0.697730409 | protein_coding   | 8  | 128426535 | 128432311 POU5F1B    |
| ENSG00000212994 | 0.499066092 | 0.390640832 | pseudogene       | 8  | 101907974 | 101908387 RPS26P6    |
| ENSG00000212997 | 1.407729925 | 0.697730409 | protein_coding   | 8  | 95558771  | 95560630             |
| ENSG00000212998 | 2.762599152 | 2.971122874 | protein_coding   | 8  | 94752349  | 94753001 C8orf39     |
| ENSG00000213005 | 1.16343121  | 0.390640832 | pseudogene       | 8  | 67679632  | 67680240 PTTG3P      |
| ENSG00000213013 | 0.499066092 | 0           | pseudogene       | 19 | 58727546  | 58727927             |
| ENSG00000213014 | 0.869158192 | 0.390640832 | pseudogene       | 19 | 56828527  | 56830849 VN2R17P     |
| ENSG00000213015 | 8.485841807 | 8.796890297 | protein_coding   | 19 | 56152392  | 56154835 ZNF580      |
| ENSG00000213018 | 2.10647801  | 1.802319292 | pseudogene       | X  | 70639933  | 70640364             |
| ENSG00000213020 | 7.947856304 | 7.546612122 | protein_coding   | 19 | 53206066  | 53238307 ZNF611      |
| ENSG00000213022 | 1.407729925 | 0           | protein_coding   | 19 | 51503806  | 51512890 KLK9        |
| ENSG00000213023 | 4.097495944 | 2.912743273 | protein_coding   | 19 | 51125236  | 51171651 SYT3        |
| ENSG00000213024 | 10.09671625 | 10.05516663 | protein_coding   | 19 | 50410086  | 50432786 NUP62       |
| ENSG00000213025 | 3.448790144 | 3.993387124 | pseudogene       | 10 | 70392128  | 70392484             |
| ENSG00000213028 | 1.960915222 | 1.353254395 | pseudogene       | 1  | 229824746 | 229825651            |
| ENSG00000213030 | 2.238690726 | 2.420525079 | protein_coding   | 19 | 49538826  | 49552400 CGB8        |
| ENSG00000213033 | 0.499066092 | 0.390640832 | pseudogene       | 1  | 220440053 | 220441259 AURKAPS1   |
| ENSG00000213036 | 0           | 0.950786998 | pseudogene       | 1  | 214656156 | 214656730            |
| ENSG00000213041 | 0.499066092 | 0.390640832 | pseudogene       | 1  | 205171319 | 205171871            |
| ENSG00000213046 | 0           | 0.950786998 | pseudogene       | 1  | 197657890 | 197659765 EEF1A1P32  |
| ENSG00000213047 | 6.050961887 | 6.440109466 | protein_coding   | 1  | 197473878 | 197744826 DENND1B    |
| ENSG00000213050 | 0.869158192 | 1.353254395 | pseudogene       | 7  | 116612219 | 116612965 TPM3P1     |
| ENSG00000213051 | 1.16343121  | 1.16600992  | pseudogene       | 1  | 185195937 | 185196832            |
| ENSG00000213055 | 0.869158192 | 0.697730409 | pseudogene       | 2  | 233594233 | 233594908            |
| ENSG00000213057 | 0.499066092 | 1.518964905 | protein_coding   | 1  | 178511887 | 178518024 C1orf220   |
| ENSG00000213060 | 0           | 0.697730409 | pseudogene       | 1  | 171772657 | 171773099            |
| ENSG00000213061 | 0           | 0.390640832 | pseudogene       | 10 | 104597768 | 104605230 PFN1P11    |
| ENSG00000213062 | 3.077135474 | 1.802319292 | pseudogene       | 1  | 169455380 | 169456846            |
| ENSG00000213063 | 0.499066092 | 0.950786998 | pseudogene       | 1  | 168907705 | 168908161            |
| ENSG00000213064 | 5.774228067 | 5.751299057 | protein_coding   | 1  | 168195176 | 168212378 SFT2D2     |
| ENSG00000213066 | 7.593829938 | 8.001751392 | protein_coding   | 6  | 167412670 | 167455906 FGFR10P    |
| ENSG00000213069 | 0           | 0.390640832 | pseudogene       | 2  | 178062713 | 178063262 KRT8P40    |
| ENSG00000213071 | 1.799000381 | 0.697730409 | pseudogene       | 6  | 160874460 | 160932156 LPAL2      |
| ENSG00000213073 | 4.292665995 | 4.468996429 | pseudogene       | 6  | 160514114 | 160517244            |
| ENSG00000213075 | 1.616589159 | 0           | pseudogene       | 1  | 161653485 | 161655042 RPL31P11   |
| ENSG00000213077 | 2.471521042 | 2.788380093 | protein_coding   | 17 | 18427880  | 18430160 FAM106A     |
| ENSG00000213078 | 0           | 0.390640832 | pseudogene       | 6  | 157787022 | 157787955            |
| ENSG00000213079 | 8.311006074 | 8.315177126 | protein_coding   | 6  | 155054459 | 155155192 SCAF8      |
| ENSG00000213080 | 2.238690726 | 2.144285137 | pseudogene       | 1  | 160864770 | 160865866            |
| ENSG00000213082 | 1.960915222 | 1.353254395 | pseudogene       | 2  | 208546314 | 208546757 PPP1R14BP2 |
| ENSG00000213085 | 5.83815965  | 5.871116342 | protein_coding   | 1  | 159842154 | 159869953 CCDC19     |

|                 |             |             |                |    |           |                    |
|-----------------|-------------|-------------|----------------|----|-----------|--------------------|
| ENSG00000213087 | 0.499066092 | 0.697730409 | pseudogene     | 6  | 151546685 | 151547082          |
| ENSG00000213090 | 0.499066092 | 0.390640832 | pseudogene     | 2  | 202275267 | 202278031          |
| ENSG00000213096 | 7.700873103 | 7.429177016 | protein_coding | 19 | 24216276  | 24312643 ZNF254    |
| ENSG00000213100 | 1.16343121  | 0           | pseudogene     | X  | 45842800  | 45843799           |
| ENSG00000213104 | 1.16343121  | 0.390640832 | pseudogene     | 2  | 198244425 | 198245616          |
| ENSG00000213109 | 0           | 0.390640832 | pseudogene     | 6  | 137221521 | 137222289          |
| ENSG00000213111 | 1.407729925 | 3.027231696 | pseudogene     | 6  | 136355655 | 136356026 COX5BP2  |
| ENSG00000213117 | 0           | 0.390640832 | pseudogene     | 6  | 135219012 | 135219889          |
| ENSG00000213121 | 0.499066092 | 0           | protein_coding | 6  | 153552455 | 153668623          |
| ENSG00000213123 | 5.948480845 | 6.246885341 | protein_coding | 3  | 195975101 | 196045170 TCTX1D2  |
| ENSG00000213126 | 0.499066092 | 0           | pseudogene     | 2  | 180678978 | 180679402          |
| ENSG00000213131 | 0.869158192 | 1.353254395 | pseudogene     | 6  | 127676901 | 127677934 YWHAZP4  |
| ENSG00000213132 | 1.960915222 | 0.697730409 | protein_coding | 3  | 187896331 | 187898598          |
| ENSG00000213135 | 1.407729925 | 1.667587519 | pseudogene     | 17 | 75085986  | 75087063           |
| ENSG00000213137 | 0           | 0.390640832 | pseudogene     | 12 | 121282913 | 121283450 ARF1P2   |
| ENSG00000213139 | 3.146112541 | 3.714580548 | protein_coding | 3  | 186256230 | 186264491 CRYGS    |
| ENSG00000213140 | 0           | 0.390640832 | pseudogene     | 14 | 106138648 | 106139651 ELK2AP   |
| ENSG00000213144 | 1.960915222 | 2.334191469 | pseudogene     | 12 | 119632655 | 119633199          |
| ENSG00000213145 | 2.10647801  | 1.667587519 | protein_coding | 14 | 105952654 | 105955284 CRIP1    |
| ENSG00000213149 | 0.869158192 | 0.950786998 | pseudogene     | 6  | 111179442 | 111180350 CNN2P9   |
| ENSG00000213152 | 1.16343121  | 1.353254395 | pseudogene     | 12 | 112739677 | 112740467 RPL7AP60 |
| ENSG00000213160 | 7.55947245  | 7.157901395 | protein_coding | 2  | 170550998 | 170633499 KLHL23   |
| ENSG00000213169 | 0.499066092 | 0.697730409 | pseudogene     | 3  | 174095034 | 174095795          |
| ENSG00000213171 | 0           | 0.390640832 | protein_coding | 1  | 151772740 | 151778630 LINGO4   |
| ENSG00000213174 | 0.499066092 | 0.390640832 | pseudogene     | 3  | 170371635 | 170372048          |
| ENSG00000213176 | 0           | 0.950786998 | pseudogene     | 14 | 103507806 | 103508431 RPL13P6  |
| ENSG00000213177 | 0.869158192 | 1.802319292 | pseudogene     | 6  | 100583940 | 100584539          |
| ENSG00000213178 | 1.16343121  | 1.802319292 | pseudogene     | 3  | 169201459 | 169201868          |
| ENSG00000213179 | 0           | 0.390640832 | pseudogene     | 17 | 65780869  | 65781409           |
| ENSG00000213180 | 0           | 0.390640832 | pseudogene     | 17 | 65220844  | 65221157           |
| ENSG00000213184 | 0           | 0.390640832 | pseudogene     | 11 | 122888346 | 122889369          |
| ENSG00000213185 | 0.499066092 | 1.518964905 | protein_coding | 10 | 124608594 | 124639157 FAM24B   |
| ENSG00000213186 | 8.316627558 | 8.076782959 | protein_coding | 3  | 160150233 | 160203561 TRIM59   |
| ENSG00000213188 | 0.499066092 | 0.950786998 | pseudogene     | 7  | 151825964 | 151826771 YBX1P4   |
| ENSG00000213189 | 0.499066092 | 0.697730409 | pseudogene     | 2  | 159860287 | 159861065 BTF3L4P2 |
| ENSG00000213190 | 5.995967334 | 6.89311646  | protein_coding | 1  | 151030234 | 151040970 MLLT11   |
| ENSG00000213194 | 0.869158192 | 0.697730409 | pseudogene     | 2  | 158067359 | 158068051          |
| ENSG00000213197 | 0.499066092 | 1.518964905 | pseudogene     | 2  | 153246451 | 153247144          |
| ENSG00000213199 | 7.768062907 | 7.23139676  | protein_coding | 7  | 150745379 | 150749843 ACCN3    |
| ENSG00000213203 | 0.499066092 | 0           | protein_coding | 7  | 150413645 | 150421372 GIMAP1   |
| ENSG00000213204 | 3.004694206 | 2.721932731 | protein_coding | 6  | 88117701  | 88221352 C6orf165  |
| ENSG00000213209 | 0.499066092 | 0.390640832 | pseudogene     | 7  | 148334271 | 148334679          |
| ENSG00000213212 | 2.762599152 | 2.039052734 | pseudogene     | 9  | 139707240 | 139709988 NCLP1    |
| ENSG00000213213 | 4.292665995 | 4.777836593 | protein_coding | 9  | 139690790 | 139704494 KIAA1984 |
| ENSG00000213214 | 2.35979773  | 0           | protein_coding | 7  | 143883176 | 143991230 ARHGEF35 |
| ENSG00000213216 | 0           | 0.697730409 | pseudogene     | 9  | 125791652 | 125792032          |
| ENSG00000213218 | 2.928422289 | 2.652276565 | protein_coding | 17 | 61949372  | 61951126 CSH2      |
| ENSG00000213221 | 2.35979773  | 3.027231696 | protein_coding | 9  | 139253932 | 139258241 DN LZ    |
| ENSG00000213222 | 4.322773689 | 5.045726316 | pseudogene     | 2  | 132480826 | 132481852          |
| ENSG00000213225 | 1.16343121  | 1.16600992  | pseudogene     | 2  | 130986949 | 130989679          |
| ENSG00000213226 | 0           | 0.390640832 | pseudogene     | 1  | 146790828 | 146791941          |
| ENSG00000213228 | 0.499066092 | 0.390640832 | pseudogene     | 17 | 58511084  | 58511573           |
| ENSG00000213234 | 0           | 1.16600992  | pseudogene     | 11 | 112138013 | 112139094 ST13P10  |
| ENSG00000213235 | 2.10647801  | 2.721932731 | pseudogene     | 12 | 17143604  | 17145017 EEF1A1P33 |
| ENSG00000213236 | 0.499066092 | 0           | pseudogene     | 2  | 127315012 | 127315739 YWHAZP2  |
| ENSG00000213237 | 1.616589159 | 2.144285137 | pseudogene     | 7  | 138088940 | 138089268          |
| ENSG00000213239 | 0.499066092 | 0.390640832 | pseudogene     | 2  | 122466088 | 122466691          |
| ENSG00000213240 | 5.649112675 | 6.25865215  | protein_coding | 1  | 145209119 | 145291954 NOTCH2NL |
| ENSG00000213244 | 2.10647801  | 2.334191469 | pseudogene     | 1  | 120904675 | 120905090          |
| ENSG00000213246 | 8.640267888 | 9.038718229 | protein_coding | 17 | 56422539  | 56429563 SUPT4H1   |
| ENSG00000213250 | 0.869158192 | 0.390640832 | pseudogene     | 12 | 94817520  | 94818745 RBMS2P1   |
| ENSG00000213252 | 0.499066092 | 0           | pseudogene     | 11 | 106697118 | 106698616          |
| ENSG00000213253 | 1.960915222 | 0.697730409 | pseudogene     | 19 | 13268773  | 13269602           |

|                 |             |             |                  |    |           |           |           |
|-----------------|-------------|-------------|------------------|----|-----------|-----------|-----------|
| ENSG00000213260 | 0           | 0.390640832 | pseudogene       | 10 | 107446080 | 107446809 | YWHAZP5   |
| ENSG00000213261 | 0.499066092 | 1.518964905 | pseudogene       | 7  | 131346711 | 131347383 |           |
| ENSG00000213269 | 0           | 0.697730409 | pseudogene       | X  | 73595960  | 73596720  |           |
| ENSG00000213270 | 1.16343121  | 0.697730409 | pseudogene       | 12 | 83545110  | 83545966  | RPL6P25   |
| ENSG00000213272 | 0.499066092 | 0.390640832 | pseudogene       | 12 | 76993451  | 76994247  |           |
| ENSG00000213275 | 1.616589159 | 1.518964905 | pseudogene       | 11 | 69070879  | 69071274  |           |
| ENSG00000213277 | 1.616589159 | 1.16600992  | pseudogene       | 10 | 104935311 | 104935851 |           |
| ENSG00000213280 | 0.499066092 | 0.950786998 | pseudogene       | 7  | 128210295 | 128210742 |           |
| ENSG00000213281 | 9.645920794 | 9.448154031 | protein_coding   | 1  | 115247090 | 115259515 | NRAS      |
| ENSG00000213283 | 5.458875168 | 5.125003832 | pseudogene       | 2  | 96191093  | 96192968  |           |
| ENSG00000213287 | 0           | 0.390640832 | pseudogene       | 11 | 86969893  | 86970301  |           |
| ENSG00000213290 | 2.35979773  | 2.144285137 | pseudogene       | 19 | 12670385  | 12671919  |           |
| ENSG00000213291 | 0.499066092 | 0.390640832 | pseudogene       | 7  | 124940558 | 124940932 |           |
| ENSG00000213293 | 0.499066092 | 0.950786998 | pseudogene       | 19 | 12370941  | 12371352  |           |
| ENSG00000213296 | 0.499066092 | 0.390640832 | pseudogene       | 7  | 124120578 | 124121449 |           |
| ENSG00000213300 | 2.671945279 | 3.027231696 | pseudogene       | 3  | 75263782  | 75264787  |           |
| ENSG00000213303 | 2.10647801  | 1.802319292 | pseudogene       | 19 | 11634251  | 11634646  |           |
| ENSG00000213304 | 2.847891871 | 2.579085888 | pseudogene       | 19 | 11632783  | 11633313  |           |
| ENSG00000213305 | 0           | 0.950786998 | pseudogene       | 11 | 84731829  | 84732699  |           |
| ENSG00000213309 | 0.499066092 | 0.697730409 | pseudogene       | 6  | 64325732  | 64326266  |           |
| ENSG00000213310 | 0.499066092 | 0           | pseudogene       | 7  | 121038506 | 121038821 |           |
| ENSG00000213312 | 0           | 1.667587519 | pseudogene       | 6  | 64258613  | 64259413  |           |
| ENSG00000213315 | 3.78787645  | 4.29708397  | pseudogene       | 14 | 91232875  | 91233333  |           |
| ENSG00000213316 | 0.499066092 | 0.390640832 | protein_coding   | 5  | 179220981 | 179223648 | LTC4S     |
| ENSG00000213326 | 1.616589159 | 1.16600992  | pseudogene       | 17 | 44798948  | 44799533  | RPS7P11   |
| ENSG00000213328 | 0.499066092 | 0.390640832 | pseudogene       | 5  | 178336711 | 178337610 |           |
| ENSG00000213331 | 0           | 0.697730409 | pseudogene       | 4  | 188891427 | 188892438 |           |
| ENSG00000213332 | 0.499066092 | 0.390640832 | pseudogene       | 4  | 187249870 | 187250755 | SLC25A5P6 |
| ENSG00000213333 | 0.499066092 | 0.697730409 | pseudogene       | 11 | 74790310  | 74791176  |           |
| ENSG00000213337 | 5.301468762 | 5.175534283 | protein_coding   | 2  | 97502348  | 97523832  | ANKRD39   |
| ENSG00000213339 | 9.89419068  | 10.66807958 | protein_coding   | 19 | 10812112  | 10824113  | QTRT1     |
| ENSG00000213341 | 8.775675113 | 9.052302903 | protein_coding   | 10 | 101948055 | 101989376 | CHUK      |
| ENSG00000213347 | 6.573375019 | 7.170413581 | protein_coding   | 5  | 176728462 | 176739758 | MXD3      |
| ENSG00000213352 | 1.616589159 | 2.144285137 | pseudogene       | 12 | 63149007  | 63150013  | GAPDHP44  |
| ENSG00000213361 | 0.499066092 | 0.390640832 | pseudogene       | 7  | 104885099 | 104885417 |           |
| ENSG00000213362 | 2.762599152 | 3.532712221 | pseudogene       | 9  | 15527131  | 15527681  | FTH1P12   |
| ENSG00000213363 | 2.57521082  | 2.501982735 | pseudogene       | 12 | 62415351  | 62415955  | RPS3P6    |
| ENSG00000213365 | 0           | 0.390640832 | pseudogene       | 11 | 71991195  | 71992222  |           |
| ENSG00000213366 | 5.588445295 | 6.434933235 | protein_coding   | 1  | 110210644 | 110252171 | GSTM2     |
| ENSG00000213370 | 1.799000381 | 0.697730409 | pseudogene       | 4  | 174554879 | 174555522 | RANP6     |
| ENSG00000213371 | 3.274897671 | 2.579085888 | pseudogene       | 3  | 120524713 | 120525592 | NAP1L1P3  |
| ENSG00000213373 | 0.499066092 | 0           | processed_transc | 17 | 41026687  | 41050751  |           |
| ENSG00000213376 | 1.960915222 | 2.039052734 | pseudogene       | 5  | 173940308 | 173941310 | GAPDHP71  |
| ENSG00000213380 | 7.30049066  | 7.195117037 | protein_coding   | 16 | 69354043  | 69373570  | COG8      |
| ENSG00000213383 | 0.499066092 | 0           | pseudogene       | 3  | 17913221  | 17914090  |           |
| ENSG00000213385 | 2.471521042 | 2.242360793 | pseudogene       | 7  | 102395593 | 102396386 |           |
| ENSG00000213386 | 2.35979773  | 1.16600992  | pseudogene       | 5  | 172189524 | 172190261 |           |
| ENSG00000213390 | 7.81647827  | 7.756190105 | protein_coding   | 10 | 98757795  | 99052413  | ARHGAP19  |
| ENSG00000213394 | 0           | 0.390640832 | pseudogene       | 7  | 100846895 | 100847776 |           |
| ENSG00000213397 | 5.498982484 | 5.248158938 | protein_coding   | X  | 152713124 | 152760978 | HAUS7     |
| ENSG00000213398 | 6.573375019 | 6.470782801 | protein_coding   | 16 | 67973653  | 67978414  | LCAT      |
| ENSG00000213399 | 0.869158192 | 0.697730409 | pseudogene       | 2  | 85142910  | 85143789  |           |
| ENSG00000213400 | 0           | 0.950786998 | pseudogene       | 2  | 85101820  | 85102144  | RPL12P18  |
| ENSG00000213402 | 5.124761037 | 5.94580061  | protein_coding   | 11 | 67202981  | 67205538  | PTPRCAP   |
| ENSG00000213403 | 0           | 0.390640832 | pseudogene       | 2  | 20026010  | 20026336  | CISD1P1   |
| ENSG00000213406 | 2.10647801  | 1.802319292 | pseudogene       | 4  | 154228944 | 154229869 | ANXA2P1   |
| ENSG00000213409 | 1.616589159 | 1.16600992  | pseudogene       | 11 | 66529046  | 66529870  |           |
| ENSG00000213411 | 0           | 0.390640832 | pseudogene       | 13 | 31113734  | 31117598  | RBM22P2   |
| ENSG00000213412 | 6.469548347 | 4.932754837 | pseudogene       | 10 | 47133338  | 47133898  |           |
| ENSG00000213413 | 0.869158192 | 1.16600992  | protein_coding   | 7  | 99815864  | 99819113  | PVRIG     |
| ENSG00000213416 | 0.869158192 | 0           | protein_coding   | 17 | 39279343  | 39280419  | KRTAP4-12 |
| ENSG00000213420 | 5.684325135 | 5.09905904  | protein_coding   | 7  | 99767229  | 99774995  | GPC2      |
| ENSG00000213423 | 0.499066092 | 0.390640832 | pseudogene       | X  | 140357479 | 140358349 | RBMX2P2   |

|                 |             |             |                  |    |           |           |          |
|-----------------|-------------|-------------|------------------|----|-----------|-----------|----------|
| ENSG00000213424 | 0.499066092 | 0           | protein_coding   | 17 | 38810917  | 38821408  | KRT222   |
| ENSG00000213430 | 6.749949642 | 6.24096575  | pseudogene       | 5  | 21882694  | 21884421  | HSPD1P1  |
| ENSG00000213432 | 0.869158192 | 2.144285137 | pseudogene       | 10 | 95043761  | 95044315  |          |
| ENSG00000213433 | 2.762599152 | 2.851901313 | pseudogene       | 5  | 151145420 | 151145939 |          |
| ENSG00000213434 | 0.499066092 | 0.697730409 | pseudogene       | 4  | 184404643 | 184405338 |          |
| ENSG00000213438 | 1.16343121  | 0.950786998 | pseudogene       | 10 | 125751426 | 125752185 |          |
| ENSG00000213440 | 0           | 0.390640832 | pseudogene       | 21 | 45466228  | 45466922  | H2AFZP1  |
| ENSG00000213442 | 5.729976786 | 6.35497494  | pseudogene       | 12 | 104659056 | 104659669 | RPL18AP3 |
| ENSG00000213443 | 2.57521082  | 2.420525079 | pseudogene       | 12 | 9847980   | 9848823   | NPM1P5   |
| ENSG00000213445 | 9.604394344 | 9.499262492 | protein_coding   | 11 | 65405568  | 65418401  | SIPA1    |
| ENSG00000213448 | 0.499066092 | 0.390640832 | pseudogene       | 4  | 138369241 | 138369655 |          |
| ENSG00000213450 | 0           | 0.390640832 | pseudogene       | 3  | 77365903  | 77366749  |          |
| ENSG00000213452 | 0.499066092 | 0.697730409 | pseudogene       | 3  | 74185110  | 74186043  | AKR1B1P2 |
| ENSG00000213453 | 2.762599152 | 3.679994897 | pseudogene       | 2  | 27615651  | 27616234  | FTH1P3   |
| ENSG00000213461 | 0           | 0.697730409 | pseudogene       | 6  | 41275904  | 41276303  |          |
| ENSG00000213462 | 6.320845526 | 6.204928885 | protein_coding   | 7  | 64451187  | 64467121  | ERV3-1   |
| ENSG00000213463 | 7.639400234 | 7.797107849 | protein_coding   | 14 | 70838148  | 70883778  | SYNJ2BP  |
| ENSG00000213465 | 8.825155121 | 9.592867142 | protein_coding   | 11 | 64781585  | 64789656  | ARL2     |
| ENSG00000213467 | 0           | 0.390640832 | pseudogene       | 9  | 124282101 | 124282730 | HMGB1P37 |
| ENSG00000213468 | 4.026095388 | 3.87606762  | processed_transc |    | 130836678 | 130964671 |          |
| ENSG00000213471 | 0.499066092 | 0           | protein_coding   | 15 | 90792762  | 90808199  | TLL13    |
| ENSG00000213478 | 2.10647801  | 1.667587519 | pseudogene       | 1  | 51623460  | 51624143  | CFL1P2   |
| ENSG00000213480 | 0.499066092 | 0           | pseudogene       | 4  | 122290588 | 122291500 |          |
| ENSG00000213483 | 0           | 0.697730409 | pseudogene       | 7  | 93474101  | 93474643  |          |
| ENSG00000213492 | 2.35979773  | 2.420525079 | pseudogene       | 4  | 118495667 | 118497329 |          |
| ENSG00000213493 | 1.407729925 | 0.950786998 | pseudogene       | 4  | 117519317 | 117520767 |          |
| ENSG00000213498 | 0.869158192 | 0.390640832 | pseudogene       | X  | 120997551 | 120998049 |          |
| ENSG00000213500 | 0           | 0.390640832 | pseudogene       | 6  | 36641594  | 36643047  | LAP3P2   |
| ENSG00000213509 | 1.616589159 | 1.16600992  | pseudogene       | 3  | 57927545  | 57928031  | PPIAP16  |
| ENSG00000213513 | 2.471521042 | 2.144285137 | pseudogene       | 10 | 79540095  | 79541634  |          |
| ENSG00000213514 | 1.407729925 | 0.697730409 | pseudogene       | 10 | 79490524  | 79494527  |          |
| ENSG00000213516 | 7.709444959 | 7.56568256  | protein_coding   | 1  | 89445139  | 89458643  | RBMXL1   |
| ENSG00000213519 | 0.499066092 | 1.16600992  | pseudogene       | 3  | 197307215 | 197307500 |          |
| ENSG00000213523 | 8.663981856 | 8.607443034 | protein_coding   | 5  | 139929752 | 139937895 | SRA1     |
| ENSG00000213526 | 0.499066092 | 1.16600992  | pseudogene       | X  | 116097017 | 116097644 | SETP8    |
| ENSG00000213529 | 0.499066092 | 1.16600992  | pseudogene       | 9  | 115124994 | 115125396 |          |
| ENSG00000213533 | 3.744048221 | 3.845183986 | protein_coding   | 3  | 52870235  | 52931612  | TMEM110  |
| ENSG00000213538 | 1.616589159 | 1.518964905 | pseudogene       | 11 | 9115910   | 9117737   | KRT8P41  |
| ENSG00000213539 | 1.407729925 | 2.242360793 | pseudogene       | 9  | 112295156 | 112296531 | YBX1P6   |
| ENSG00000213540 | 0.499066092 | 0.390640832 | pseudogene       | 1  | 84551424  | 84551916  |          |
| ENSG00000213542 | 2.10647801  | 1.925536307 | pseudogene       | 7  | 76744716  | 76745509  |          |
| ENSG00000213549 | 0           | 0.950786998 | pseudogene       | 7  | 75742344  | 75742718  |          |
| ENSG00000213551 | 6.305850085 | 6.343971006 | protein_coding   | 10 | 74943120  | 75008620  | DNAJC9   |
| ENSG00000213553 | 3.830412367 | 3.845183986 | pseudogene       | 2  | 38708920  | 38710012  | RPLP0P6  |
| ENSG00000213558 | 0           | 0.390640832 | pseudogene       | 9  | 110220319 | 110220587 | HMGN2P32 |
| ENSG00000213559 | 0           | 0.390640832 | pseudogene       | 1  | 80916767  | 80917690  |          |
| ENSG00000213563 | 7.527512071 | 7.758263791 | protein_coding   | 8  | 145751117 | 145754516 | C8orf82  |
| ENSG00000213569 | 0.499066092 | 0           | pseudogene       | X  | 106374887 | 106375486 |          |
| ENSG00000213574 | 2.762599152 | 3.133298822 | pseudogene       | 10 | 120692186 | 120692807 | LDHAP5   |
| ENSG00000213579 | 0.869158192 | 0           | pseudogene       | 1  | 76047784  | 76048240  |          |
| ENSG00000213585 | 11.35174487 | 11.11318624 | protein_coding   | 5  | 133307606 | 133340824 | VDAC1    |
| ENSG00000213587 | 0           | 0.390640832 | pseudogene       | 3  | 50756913  | 50757382  |          |
| ENSG00000213588 | 7.881135284 | 7.905863867 | protein_coding   | 6  | 33422356  | 33425325  | ZBTB9    |
| ENSG00000213590 | 1.407729925 | 1.925536307 | pseudogene       | 9  | 139830292 | 139831613 |          |
| ENSG00000213592 | 1.16343121  | 1.802319292 | pseudogene       | 11 | 57485516  | 57486002  |          |
| ENSG00000213593 | 9.252165193 | 9.541415338 | protein_coding   | 11 | 57480072  | 57508445  | TMX2     |
| ENSG00000213594 | 0           | 0.390640832 | pseudogene       | 2  | 38512552  | 38513552  | GAPDHP25 |
| ENSG00000213598 | 0.869158192 | 1.518964905 | pseudogene       | 14 | 59261372  | 59261747  |          |
| ENSG00000213599 | 1.616589159 | 0.697730409 | processed_transc | 16 | 30205213  | 30215631  | SULT1A3  |
| ENSG00000213600 | 1.16343121  | 0.950786998 | pseudogene       | 3  | 50277054  | 50277416  |          |
| ENSG00000213601 | 0.499066092 | 0.697730409 | pseudogene       | 2  | 190175989 | 190176693 | KRT18P19 |
| ENSG00000213608 | 1.16343121  | 0           | pseudogene       | 4  | 84398674  | 84399568  |          |
| ENSG00000213609 | 1.799000381 | 1.667587519 | pseudogene       | 10 | 65662211  | 65663005  |          |

|                 |             |             |                  |    |           |                    |
|-----------------|-------------|-------------|------------------|----|-----------|--------------------|
| ENSG00000213612 | 2.10647801  | 2.420525079 | pseudogene       | 9  | 99883941  | 99884713           |
| ENSG00000213613 | 2.671945279 | 2.851901313 | pseudogene       | 10 | 89705259  | 89705781           |
| ENSG00000213614 | 7.337827682 | 7.575124073 | protein_coding   | 15 | 72635775  | 72668817 HEXA      |
| ENSG00000213619 | 8.829093615 | 9.483053775 | protein_coding   | 11 | 47586888  | 47606114 NDUFS3    |
| ENSG00000213621 | 1.616589159 | 2.501982735 | pseudogene       | 13 | 21535449  | 21536334 RPSAP54   |
| ENSG00000213625 | 8.734271811 | 9.084889332 | protein_coding   | 1  | 65886270  | 65901690 LEPROT    |
| ENSG00000213626 | 4.689181911 | 3.081239798 | protein_coding   | 2  | 30454397  | 30546596 LBH       |
| ENSG00000213638 | 6.421663777 | 7.00911166  | protein_coding   | 19 | 1905417   | 1913444 ADAT3      |
| ENSG00000213639 | 11.10772284 | 10.84606359 | protein_coding   | 2  | 28974506  | 29025806 PPP1CB    |
| ENSG00000213640 | 0           | 1.667587519 | pseudogene       | 7  | 64323377  | 64324748           |
| ENSG00000213641 | 0.869158192 | 1.16600992  | pseudogene       | 14 | 56010119  | 56010887           |
| ENSG00000213642 | 1.407729925 | 2.242360793 | pseudogene       | 7  | 64029806  | 64030815           |
| ENSG00000213643 | 0           | 0.390640832 | pseudogene       | 7  | 63610063  | 63610810 VN1R37P   |
| ENSG00000213644 | 0.499066092 | 0           | pseudogene       | 7  | 63642088  | 63643271           |
| ENSG00000213645 | 0           | 0.390640832 | pseudogene       | 7  | 63391519  | 63392346           |
| ENSG00000213650 | 1.407729925 | 0           | pseudogene       | 7  | 56635599  | 56636551           |
| ENSG00000213652 | 0.499066092 | 0           | pseudogene       | X  | 111933143 | 111933748 HMGB3P30 |
| ENSG00000213654 | 7.190493718 | 7.778838337 | protein_coding   | 6  | 32158543  | 32163300 GPM3      |
| ENSG00000213658 | 1.16343121  | 1.16600992  | protein_coding   | 16 | 28996147  | 29002104 LAT       |
| ENSG00000213661 | 0           | 0.390640832 | pseudogene       | 5  | 120951942 | 120952502          |
| ENSG00000213669 | 0           | 0.390640832 | pseudogene       | 9  | 95439225  | 95439689           |
| ENSG00000213671 | 0           | 0.697730409 | pseudogene       | 17 | 20678923  | 20680213           |
| ENSG00000213672 | 8.732871027 | 9.28800787  | protein_coding   | 3  | 48701364  | 48723797 NCKIPSD   |
| ENSG00000213673 | 0           | 0.390640832 | pseudogene       | 7  | 54487137  | 54488021           |
| ENSG00000213676 | 9.319971717 | 9.388489822 | protein_coding   | 6  | 32065907  | 32096030 ATF6B     |
| ENSG00000213683 | 0           | 1.16600992  | pseudogene       | 22 | 51193096  | 51193862           |
| ENSG00000213684 | 0.869158192 | 0.697730409 | pseudogene       | X  | 75555240  | 75556244 LDHBP2    |
| ENSG00000213688 | 2.10647801  | 2.851901313 | processed_transc | 17 | 18566485  | 18585572 FOXO3B    |
| ENSG00000213689 | 6.509364082 | 6.587342979 | protein_coding   | 3  | 48506445  | 48509044 TREX1     |
| ENSG00000213693 | 3.603959378 | 3.279072565 | pseudogene       | 11 | 43919006  | 43921186           |
| ENSG00000213694 | 7.913645586 | 7.577474828 | protein_coding   | 9  | 91606362  | 91619925 S1PR3     |
| ENSG00000213695 | 2.10647801  | 1.925536307 | pseudogene       | X  | 73629353  | 73629935 RPS7P14   |
| ENSG00000213697 | 0.499066092 | 0           | pseudogene       | 11 | 43543586  | 43544814           |
| ENSG00000213698 | 0           | 0.390640832 | pseudogene       | X  | 71947802  | 71948646           |
| ENSG00000213699 | 10.24214716 | 9.992687904 | protein_coding   | 2  | 26987152  | 27004099 C2orf18   |
| ENSG00000213700 | 2.10647801  | 2.144285137 | pseudogene       | 10 | 74765591  | 74766353           |
| ENSG00000213701 | 2.57521082  | 2.144285137 | pseudogene       | 5  | 96392106  | 96393062 SETP22    |
| ENSG00000213703 | 0           | 0.390640832 | pseudogene       | 1  | 63106793  | 63107338           |
| ENSG00000213704 | 0           | 0.697730409 | pseudogene       | X  | 97644508  | 97645918 EEF1A1P15 |
| ENSG00000213706 | 0           | 0.950786998 | pseudogene       | X  | 70572268  | 70572838           |
| ENSG00000213707 | 0.869158192 | 0.697730409 | pseudogene       | 22 | 26956492  | 26957054 HMGB1P10  |
| ENSG00000213711 | 0.499066092 | 0.390640832 | pseudogene       | 9  | 88513818  | 88514631 PHBP7     |
| ENSG00000213713 | 5.806547963 | 5.583678991 | pseudogene       | 11 | 33097112  | 33098006 PIGCP1    |
| ENSG00000213714 | 2.10647801  | 2.420525079 | protein_coding   | 20 | 55108302  | 55111576 FAM209B   |
| ENSG00000213717 | 0.499066092 | 0           | pseudogene       | 7  | 43313758  | 43314181           |
| ENSG00000213719 | 11.89289638 | 12.23887067 | protein_coding   | 6  | 31698358  | 31707540 CLIC1     |
| ENSG00000213721 | 0.499066092 | 0           | pseudogene       | 7  | 42152964  | 42153219 HMGN2P30  |
| ENSG00000213722 | 8.066039442 | 8.64266806  | protein_coding   | 6  | 31694815  | 31698394 DDAH2     |
| ENSG00000213726 | 0.869158192 | 0.390640832 | pseudogene       | 19 | 690381    | 691175             |
| ENSG00000213731 | 0.499066092 | 0.697730409 | pseudogene       | 10 | 76183193  | 76183772           |
| ENSG00000213736 | 0           | 0.390640832 | pseudogene       | 12 | 25120061  | 25120438           |
| ENSG00000213740 | 2.10647801  | 0.697730409 | pseudogene       | X  | 68003315  | 68004909           |
| ENSG00000213741 | 10.71728035 | 11.53422571 | protein_coding   | 14 | 50043390  | 50065408 RPS29     |
| ENSG00000213742 | 6.121171528 | 6.59664425  | antisense        | 20 | 25604681  | 25658710           |
| ENSG00000213744 | 0           | 0.390640832 | pseudogene       | 7  | 37415125  | 37415626 RPS10P14  |
| ENSG00000213750 | 0.869158192 | 0.697730409 | pseudogene       | 8  | 98636431  | 98637307           |
| ENSG00000213753 | 9.399818301 | 9.32205174  | pseudogene       | 19 | 59084870  | 59111168           |
| ENSG00000213755 | 0.499066092 | 0.390640832 | pseudogene       | 5  | 78806257  | 78806742           |
| ENSG00000213757 | 2.35979773  | 2.334191469 | pseudogene       | 5  | 78579955  | 78580741           |
| ENSG00000213760 | 2.10647801  | 3.493416095 | protein_coding   | 6  | 31512239  | 31516204 ATP6V1G2  |
| ENSG00000213761 | 1.407729925 | 1.16600992  | pseudogene       | 9  | 98175401  | 98175799 MT1P1     |
| ENSG00000213762 | 8.217949183 | 7.858322159 | protein_coding   | 19 | 58125619  | 58134721 ZNF134    |
| ENSG00000213763 | 4.131913373 | 3.232099092 | pseudogene       | 5  | 77080705  | 77081827           |

|                 |             |             |                |    |           |           |
|-----------------|-------------|-------------|----------------|----|-----------|-----------|
| ENSG00000213770 | 0           | 0.697730409 | pseudogene     | 10 | 27638646  | 27639219  |
| ENSG00000213772 | 0.869158192 | 1.353254395 | pseudogene     | 2  | 9411421   | 9411757   |
| ENSG00000213777 | 1.799000381 | 2.039052734 | pseudogene     | 19 | 54006646  | 54007532  |
| ENSG00000213779 | 1.799000381 | 1.16600992  | pseudogene     | 11 | 17215036  | 17215855  |
| ENSG00000213780 | 2.847891871 | 3.87606762  | protein_coding | 6  | 30875961  | 30881883  |
| ENSG00000213782 | 5.785082014 | 4.932754837 | protein_coding | 12 | 12966250  | 12982915  |
| ENSG00000213785 | 0           | 1.518964905 | pseudogene     | 11 | 16505631  | 16506218  |
| ENSG00000213786 | 0           | 0.390640832 | pseudogene     | 7  | 27087788  | 27088247  |
| ENSG00000213787 | 0           | 0.697730409 | pseudogene     | 7  | 26961729  | 26962531  |
| ENSG00000213790 | 1.407729925 | 0.390640832 | pseudogene     | 22 | 42503769  | 42504957  |
| ENSG00000213791 | 0.499066092 | 0.390640832 | pseudogene     | 8  | 81213104  | 81213716  |
| ENSG00000213793 | 0.499066092 | 0.697730409 | protein_coding | 19 | 53418450  | 53421126  |
| ENSG00000213798 | 0.499066092 | 0.390640832 | pseudogene     | 7  | 25251789  | 25252584  |
| ENSG00000213799 | 8.094677541 | 7.694718794 | protein_coding | 19 | 53837002  | 53858122  |
| ENSG00000213809 | 0           | 1.353254395 | protein_coding | 12 | 10524952  | 10544473  |
| ENSG00000213820 | 1.799000381 | 2.242360793 | pseudogene     | 20 | 44728157  | 44728815  |
| ENSG00000213828 | 0.499066092 | 0           | protein_coding | 2  | 240083493 | 240084053 |
| ENSG00000213830 | 1.16343121  | 0           | pseudogene     | 5  | 68609198  | 68609699  |
| ENSG00000213839 | 5.255381949 | 5.248158938 | pseudogene     | 9  | 37885680  | 37886610  |
| ENSG00000213842 | 0.869158192 | 1.353254395 | pseudogene     | 3  | 32794402  | 32795393  |
| ENSG00000213846 | 3.652182994 | 3.411459265 | pseudogene     | 3  | 27674467  | 27675211  |
| ENSG00000213849 | 0           | 0.697730409 | pseudogene     | 3  | 32549447  | 32549817  |
| ENSG00000213851 | 2.10647801  | 1.518964905 | pseudogene     | 4  | 43412058  | 43412954  |
| ENSG00000213853 | 9.787584866 | 9.140798547 | protein_coding | 16 | 10622279  | 10674555  |
| ENSG00000213857 | 1.799000381 | 1.16600992  | pseudogene     | 22 | 41470184  | 41471243  |
| ENSG00000213859 | 8.658089807 | 9.71586779  | protein_coding | 17 | 7255208   | 7258258   |
| ENSG00000213860 | 0           | 0.697730409 | pseudogene     | 7  | 20042346  | 20042909  |
| ENSG00000213862 | 1.960915222 | 2.788380093 | pseudogene     | 15 | 48022341  | 48023132  |
| ENSG00000213863 | 0           | 1.353254395 | lincRNA        | 6  | 171034285 | 171037576 |
| ENSG00000213864 | 1.407729925 | 0.950786998 | pseudogene     | 5  | 67455046  | 67455721  |
| ENSG00000213865 | 4.409500985 | 4.101879561 | protein_coding | 8  | 67579850  | 67597799  |
| ENSG00000213866 | 2.35979773  | 3.232099092 | pseudogene     | 9  | 35971341  | 35972315  |
| ENSG00000213867 | 1.407729925 | 0.950786998 | pseudogene     | 14 | 31290625  | 31291049  |
| ENSG00000213871 | 0.499066092 | 0           | pseudogene     | 3  | 25796416  | 25797161  |
| ENSG00000213872 | 1.16343121  | 0.697730409 | pseudogene     | 3  | 25790979  | 25791387  |
| ENSG00000213875 | 1.407729925 | 1.518964905 | pseudogene     | 7  | 13911481  | 13912138  |
| ENSG00000213880 | 0           | 0.697730409 | pseudogene     | 6  | 29770972  | 29771768  |
| ENSG00000213881 | 2.847891871 | 3.453019579 | pseudogene     | 8  | 62114909  | 62115779  |
| ENSG00000213885 | 2.10647801  | 2.144285137 | pseudogene     | 21 | 26734135  | 26734745  |
| ENSG00000213886 | 0.499066092 | 0.390640832 | protein_coding | 6  | 29523292  | 29527702  |
| ENSG00000213888 | 4.026095388 | 4.448594745 | protein_coding | 22 | 31742875  | 31744670  |
| ENSG00000213889 | 3.393122761 | 3.714580548 | protein_coding | 19 | 45992035  | 46005768  |
| ENSG00000213891 | 1.616589159 | 1.925536307 | pseudogene     | 5  | 60686495  | 60687698  |
| ENSG00000213892 | 1.16343121  | 1.16600992  | protein_coding | 19 | 45202492  | 45213986  |
| ENSG00000213901 | 5.360713447 | 5.901455548 | protein_coding | 2  | 219940051 | 220035549 |
| ENSG00000213903 | 8.185546801 | 8.682523569 | protein_coding | 14 | 24780656  | 24787242  |
| ENSG00000213904 | 3.004694206 | 2.721932731 | protein_coding | 19 | 42928421  | 43030020  |
| ENSG00000213906 | 3.989024711 | 4.676215056 | protein_coding | 14 | 24774940  | 24781259  |
| ENSG00000213917 | 2.762599152 | 3.993387124 | pseudogene     | 2  | 215145362 | 215146176 |
| ENSG00000213918 | 6.554468172 | 6.771086752 | protein_coding | 16 | 3692939   | 3713727   |
| ENSG00000213920 | 2.762599152 | 3.133298822 | protein_coding | 14 | 24681945  | 24685276  |
| ENSG00000213923 | 11.16778958 | 10.70267945 | protein_coding | 22 | 38686697  | 38794527  |
| ENSG00000213925 | 0.869158192 | 1.353254395 | pseudogene     | 2  | 204637354 | 204638225 |
| ENSG00000213928 | 5.346128795 | 6.130036786 | protein_coding | 14 | 24630262  | 24635774  |
| ENSG00000213930 | 6.442380648 | 6.99862477  | protein_coding | 9  | 34638130  | 34651032  |
| ENSG00000213931 | 2.471521042 | 1.353254395 | protein_coding | 11 | 5289582   | 5526847   |
| ENSG00000213937 | 4.642199401 | 4.075511708 | protein_coding | 16 | 3062457   | 3064506   |
| ENSG00000213938 | 0.869158192 | 0.390640832 | pseudogene     | 2  | 200524274 | 200525452 |
| ENSG00000213939 | 1.960915222 | 2.039052734 | pseudogene     | 17 | 4608111   | 4608512   |
| ENSG00000213940 | 0           | 0.390640832 | pseudogene     | 5  | 52502391  | 52503006  |
| ENSG00000213942 | 0           | 1.518964905 | pseudogene     | 12 | 6518803   | 6519179   |
| ENSG00000213943 | 0.499066092 | 0.697730409 | pseudogene     | 3  | 12828892  | 12830170  |
| ENSG00000213946 | 0           | 0.390640832 | pseudogene     | 2  | 192745908 | 192746931 |



|                 |             |             |                  |    |           |           |          |
|-----------------|-------------|-------------|------------------|----|-----------|-----------|----------|
| ENSG00000213949 | 6.851544845 | 7.909600377 | protein_coding   | 5  | 52083730  | 52252327  | ITGA1    |
| ENSG00000213950 | 0.499066092 | 1.353254395 | pseudogene       | 20 | 14738209  | 14738702  | RPS10P2  |
| ENSG00000213953 | 0.499066092 | 0.390640832 | protein_coding   | 2  | 187361840 | 187365393 |          |
| ENSG00000213958 | 0           | 0.390640832 | pseudogene       | 2  | 182825939 | 182827205 | KRT18P29 |
| ENSG00000213959 | 1.16343121  | 0.950786998 | pseudogene       | 20 | 37243556  | 37244119  |          |
| ENSG00000213962 | 0           | 0.697730409 | pseudogene       | 2  | 178862000 | 178863497 | API5P2   |
| ENSG00000213963 | 3.78787645  | 4.319727133 | processed_transc | 2  | 178148236 | 178257419 |          |
| ENSG00000213965 | 7.549958459 | 7.301328834 | protein_coding   | 19 | 33182867  | 33204701  | NUDT19   |
| ENSG00000213967 | 6.676071387 | 6.628734426 | protein_coding   | 19 | 24097678  | 24127961  | ZNF726   |
| ENSG00000213970 | 1.16343121  | 0.390640832 | pseudogene       | 12 | 4433538   | 4433977   |          |
| ENSG00000213971 | 5.785082014 | 5.6022688   | protein_coding   | 19 | 23442763  | 23445436  |          |
| ENSG00000213972 | 0.499066092 | 0           | pseudogene       | 6  | 25272429  | 25273976  |          |
| ENSG00000213976 | 1.16343121  | 2.788380093 | pseudogene       | 19 | 21566730  | 21566877  |          |
| ENSG00000213977 | 6.449220685 | 7.249200135 | protein_coding   | 17 | 3566196   | 3571976   | TAX1BP3  |
| ENSG00000213979 | 0           | 0.390640832 | pseudogene       | 20 | 36073135  | 36073936  | RPL7AP14 |
| ENSG00000213983 | 8.708847212 | 8.886830358 | protein_coding   | 14 | 24028774  | 24037279  | AP1G2    |
| ENSG00000213985 | 0.869158192 | 1.667587519 | pseudogene       | 19 | 20368529  | 20370227  |          |
| ENSG00000213987 | 0           | 0.390640832 | pseudogene       | 1  | 41730220  | 41730534  |          |
| ENSG00000213988 | 7.983632192 | 7.959118381 | protein_coding   | 19 | 20188803  | 20237885  | ZNF90    |
| ENSG00000213993 | 1.407729925 | 1.16600992  | protein_coding   | 19 | 19550811  | 19553580  |          |
| ENSG00000213994 | 0.499066092 | 0.950786998 | antisense        | 10 | 6239575   | 6244656   |          |
| ENSG00000213995 | 7.759833327 | 7.63953919  | protein_coding   | 13 | 111267881 | 111292340 | CARKD    |
| ENSG00000213996 | 0           | 0.390640832 | protein_coding   | 19 | 19375174  | 19384074  | TM6SF2   |
| ENSG00000213997 | 1.407729925 | 1.353254395 | pseudogene       | X  | 46506029  | 46506765  | PGAM1P7  |
| ENSG00000213999 | 4.026095388 | 4.101879561 | protein_coding   | 19 | 19256377  | 19303400  | MEF2B    |
| ENSG00000214006 | 0.499066092 | 1.353254395 | pseudogene       | 9  | 32556904  | 32557921  |          |
| ENSG00000214009 | 0.499066092 | 0.390640832 | pseudogene       | X  | 45918186  | 45918963  |          |
| ENSG00000214012 | 0.499066092 | 0           | pseudogene       | 6  | 19612986  | 19614267  | KRT18P38 |
| ENSG00000214013 | 6.428602508 | 6.57327766  | protein_coding   | 15 | 42565431  | 42645864  | GANC     |
| ENSG00000214014 | 4.800350936 | 5.784235782 | protein_coding   | 17 | 1945277   | 1946479   | OVCA2    |
| ENSG00000214016 | 1.16343121  | 1.802319292 | pseudogene       | X  | 44600333  | 44601210  |          |
| ENSG00000214018 | 1.799000381 | 0.697730409 | pseudogene       | X  | 44168560  | 44169722  | RRM2P3   |
| ENSG00000214019 | 2.847891871 | 3.183544561 | pseudogene       | X  | 43888578  | 43890167  |          |
| ENSG00000214021 | 6.050961887 | 6.149127429 | protein_coding   | 3  | 9849770   | 9896822   | TTLL3    |
| ENSG00000214022 | 10.84854275 | 10.97201656 | protein_coding   | 7  | 150065278 | 150071133 | REPIN1   |
| ENSG00000214026 | 8.207901394 | 8.509895614 | protein_coding   | 11 | 1968508   | 2005752   | MRPL23   |
| ENSG00000214027 | 0.499066092 | 0           | pseudogene       | 6  | 15935013  | 15935546  | ARPC3P5  |
| ENSG00000214029 | 6.086493765 | 6.037446454 | protein_coding   | 12 | 133694740 | 133707059 | ZNF891   |
| ENSG00000214041 | 0.499066092 | 0.697730409 | pseudogene       | 3  | 9390071   | 9390952   | PGAM1P4  |
| ENSG00000214046 | 9.520012288 | 9.373687408 | protein_coding   | 19 | 16741575  | 16770955  | C19orf42 |
| ENSG00000214049 | 9.132969064 | 4.385599336 | non_coding       | 19 | 15939757  | 15947130  | UCA1     |
| ENSG00000214050 | 4.352265886 | 4.65855978  | protein_coding   | 8  | 28205804  | 28347835  | FBXO16   |
| ENSG00000214051 | 0.499066092 | 0           | pseudogene       | 13 | 101408805 | 101409313 | ARF4P3   |
| ENSG00000214062 | 0.499066092 | 0.390640832 | pseudogene       | 4  | 78003556  | 78004279  |          |
| ENSG00000214063 | 9.519199923 | 9.488685117 | protein_coding   | 11 | 842808    | 867116    | TSPAN4   |
| ENSG00000214067 | 0.499066092 | 0.390640832 | pseudogene       | 10 | 112016822 | 112017601 |          |
| ENSG00000214070 | 0           | 0.390640832 | pseudogene       | 2  | 136655525 | 136656548 |          |
| ENSG00000214076 | 6.032862302 | 5.886365696 | pseudogene       | 22 | 32665368  | 32669097  | CPSF1P1  |
| ENSG00000214077 | 0           | 0.390640832 | pseudogene       | 2  | 132181370 | 132182440 | GNAQP1   |
| ENSG00000214078 | 11.10474761 | 11.53966118 | protein_coding   | 20 | 34213953  | 34252878  | CPNE1    |
| ENSG00000214081 | 0.499066092 | 0           | pseudogene       | 2  | 131437623 | 131449264 | CYP4F30P |
| ENSG00000214087 | 6.788216822 | 6.485878328 | protein_coding   | 17 | 79648250  | 79650954  | ARL16    |
| ENSG00000214089 | 0.869158192 | 0.697730409 | pseudogene       | 10 | 44910097  | 44910601  |          |
| ENSG00000214093 | 1.799000381 | 2.242360793 | pseudogene       | 22 | 31955469  | 31955925  |          |
| ENSG00000214097 | 0.499066092 | 0           | protein_coding   | 3  | 196233748 | 196242237 | C3orf43  |
| ENSG00000214102 | 0           | 0.390640832 | protein_coding   | 7  | 141408153 | 141431071 | WEE2     |
| ENSG00000214106 | 5.729976786 | 5.638744877 | protein_coding   | 7  | 154720208 | 154741618 |          |
| ENSG00000214108 | 1.407729925 | 1.16600992  | pseudogene       | 5  | 31908467  | 31909292  |          |
| ENSG00000214109 | 0           | 1.16600992  | protein_coding   | 19 | 13890884  | 13900972  |          |
| ENSG00000214110 | 3.78787645  | 4.342020395 | pseudogene       | 9  | 14921335  | 14922332  | LDHAP4   |
| ENSG00000214111 | 0.869158192 | 1.16600992  | pseudogene       | X  | 25047662  | 25048352  |          |
| ENSG00000214112 | 4.261916566 | 4.7279204   | protein_coding   | 17 | 77015291  | 77023683  |          |
| ENSG00000214113 | 8.112022537 | 8.455978641 | protein_coding   | 6  | 5108653   | 5261172   | LYRM4    |

|                 |             |             |                  |    |           |           |            |
|-----------------|-------------|-------------|------------------|----|-----------|-----------|------------|
| ENSG00000214114 | 7.363400307 | 7.222412001 | protein_coding   | 1  | 39328636  | 39347289  | MYCBP      |
| ENSG00000214117 | 0.869158192 | 0.950786998 | protein_coding   | 7  | 139073926 | 139077714 |            |
| ENSG00000214121 | 0.869158192 | 0.390640832 | pseudogene       | 9  | 12972847  | 12973438  |            |
| ENSG00000214125 | 0           | 0.390640832 | pseudogene       | 22 | 31551952  | 31552633  |            |
| ENSG00000214128 | 0.499066092 | 0           | protein_coding   | 7  | 138482695 | 138522846 | TMEM213    |
| ENSG00000214132 | 0           | 0.390640832 | pseudogene       | 5  | 20304154  | 20305557  |            |
| ENSG00000214135 | 6.462804234 | 6.515603638 | pseudogene       | 3  | 197305084 | 197354777 |            |
| ENSG00000214140 | 1.16343121  | 1.667587519 | protein_coding   | 17 | 74523871  | 74541458  | PRCD       |
| ENSG00000214142 | 0           | 0.390640832 | pseudogene       | 7  | 99737252  | 99738305  |            |
| ENSG00000214144 | 0.499066092 | 0.390640832 | pseudogene       | 1  | 247393242 | 247395180 |            |
| ENSG00000214145 | 4.842525946 | 4.385599336 | lincRNA          | 3  | 194014254 | 194030592 |            |
| ENSG00000214146 | 0.869158192 | 1.353254395 | processed_transc | 3  | 193675161 | 193721448 |            |
| ENSG00000214160 | 10.08742937 | 10.25489893 | protein_coding   | 3  | 183960089 | 183967336 | ALG3       |
| ENSG00000214161 | 0           | 0.390640832 | pseudogene       | 22 | 30877298  | 30877898  | SDC4P      |
| ENSG00000214174 | 5.498982484 | 6.204928885 | pseudogene       | 17 | 62962668  | 62971694  | AMZ2P1     |
| ENSG00000214176 | 4.800350936 | 5.03207928  | protein_coding   | 17 | 62796901  | 62833243  |            |
| ENSG00000214182 | 3.146112541 | 2.788380093 | pseudogene       | 13 | 82264203  | 82264535  | PTMAP5     |
| ENSG00000214184 | 2.57521082  | 2.721932731 | antisense        | 2  | 109123971 | 109150652 |            |
| ENSG00000214185 | 2.671945279 | 2.334191469 | pseudogene       | 20 | 32801301  | 32803698  | XPOTP1     |
| ENSG00000214188 | 1.407729925 | 1.667587519 | protein_coding   | 7  | 116593953 | 116738860 | ST7-OT4    |
| ENSG00000214189 | 1.616589159 | 3.081239798 | protein_coding   | 19 | 12203078  | 12225499  | ZNF788     |
| ENSG00000214190 | 0.499066092 | 1.518964905 | pseudogene       | 9  | 5418373   | 5418976   |            |
| ENSG00000214192 | 1.407729925 | 0.390640832 | pseudogene       | 3  | 175436019 | 175436458 | UBE2V1P2   |
| ENSG00000214193 | 6.917151646 | 7.646273261 | protein_coding   | 1  | 36771988  | 36790484  | SH3D21     |
| ENSG00000214194 | 7.853042529 | 8.086718736 | protein_coding   | 7  | 112756773 | 112758668 |            |
| ENSG00000214195 | 0.499066092 | 0.697730409 | pseudogene       | 9  | 5311444   | 5311711   | HMGN2P31   |
| ENSG00000214198 | 2.35979773  | 3.232099092 | pseudogene       | 12 | 104237527 | 104323989 |            |
| ENSG00000214199 | 3.502389126 | 3.679994897 | pseudogene       | 2  | 107313787 | 107315132 | EEF1A1P12  |
| ENSG00000214200 | 0.499066092 | 0           | pseudogene       | 20 | 32500129  | 32501142  | TPM3P2     |
| ENSG00000214203 | 0.869158192 | 0.950786998 | pseudogene       | 12 | 100402830 | 100403616 |            |
| ENSG00000214207 | 1.616589159 | 0.390640832 | pseudogene       | Y  | 5441186   | 5442472   | KRT18P10   |
| ENSG00000214212 | 3.652182994 | 3.845183986 | protein_coding   | 19 | 10959106  | 10980360  | C19orf38   |
| ENSG00000214222 | 1.16343121  | 0.390640832 | pseudogene       | 13 | 41958909  | 41959319  | TUBBP2     |
| ENSG00000214223 | 3.393122761 | 3.493416095 | pseudogene       | 19 | 11776884  | 11777845  | HNRNPA1P10 |
| ENSG00000214226 | 5.472368541 | 5.98174124  | protein_coding   | 17 | 54869274  | 54916134  | C17orf67   |
| ENSG00000214239 | 1.16343121  | 0.950786998 | protein_coding   | 6  | 159047471 | 159049322 |            |
| ENSG00000214243 | 0.499066092 | 1.16600992  | pseudogene       | 7  | 76279718  | 76280214  |            |
| ENSG00000214248 | 1.616589159 | 0.950786998 | protein_coding   | 19 | 7963689   | 7968427   |            |
| ENSG00000214249 | 2.928422289 | 3.027231696 | pseudogene       | 13 | 75812080  | 75814432  | CTAGE11P   |
| ENSG00000214253 | 9.408618364 | 9.534777296 | protein_coding   | 7  | 100882739 | 100895597 | FIS1       |
| ENSG00000214255 | 0.499066092 | 0           | pseudogene       | 18 | 68096396  | 68098361  |            |
| ENSG00000214262 | 6.26766507  | 5.863430791 | protein_coding   | 1  | 168214803 | 168216581 | ANKRD36BP1 |
| ENSG00000214264 | 0.869158192 | 0           | pseudogene       | 11 | 112051496 | 112053914 |            |
| ENSG00000214265 | 3.004694206 | 3.532712221 | protein_coding   | 15 | 25200135  | 25245423  | SNURF      |
| ENSG00000214269 | 4.097495944 | 3.453019579 | pseudogene       | 13 | 65532229  | 65533528  | LGMNP1     |
| ENSG00000214273 | 0.869158192 | 2.039052734 | pseudogene       | 4  | 190962497 | 190964569 | AGGF1P1    |
| ENSG00000214274 | 4.062237333 | 4.640685763 | protein_coding   | 14 | 21152336  | 21167130  | ANG        |
| ENSG00000214278 | 0           | 0.390640832 | pseudogene       | 5  | 403846    | 404661    |            |
| ENSG00000214279 | 7.834876234 | 8.593573257 | protein_coding   | 10 | 135267432 | 135337062 |            |
| ENSG00000214280 | 0.499066092 | 1.518964905 | pseudogene       | 3  | 139301770 | 139302435 |            |
| ENSG00000214281 | 0           | 0.390640832 | pseudogene       | 13 | 59584508  | 59584740  | HMGN2P39   |
| ENSG00000214282 | 0.869158192 | 0.950786998 | pseudogene       | X  | 45491537  | 45492978  | KRT8P14    |
| ENSG00000214283 | 0           | 0.697730409 | pseudogene       | 3  | 136617918 | 136618918 |            |
| ENSG00000214289 | 1.407729925 | 0.697730409 | pseudogene       | 3  | 134070694 | 134075403 | RPL39P5    |
| ENSG00000214290 | 1.407729925 | 0           | protein_coding   | 11 | 111169565 | 111179460 | C11orf93   |
| ENSG00000214293 | 6.681890601 | 6.223059835 | processed_transc | 7  | 77286977  | 77325582  |            |
| ENSG00000214294 | 0.499066092 | 0.950786998 | protein_coding   | 10 | 127445352 | 127445665 |            |
| ENSG00000214297 | 2.10647801  | 1.518964905 | pseudogene       | 10 | 127355444 | 127356519 | ALDOAP2    |
| ENSG00000214298 | 0           | 0.390640832 | pseudogene       | 10 | 126855246 | 126855506 |            |
| ENSG00000214300 | 5.83815965  | 5.200150955 | protein_coding   | 7  | 99905325  | 99919819  | SPDYE3     |
| ENSG00000214309 | 3.698846687 | 4.468996429 | protein_coding   | 7  | 99724317  | 99726118  | MBLAC1     |
| ENSG00000214313 | 0.499066092 | 0.950786998 | pseudogene       | 7  | 99578385  | 99585158  | AZGP1P1    |
| ENSG00000214318 | 1.799000381 | 0           | pseudogene       | 18 | 61164222  | 61164633  | ATP5G1P6   |

|                 |             |             |                  |    |           |           |           |
|-----------------|-------------|-------------|------------------|----|-----------|-----------|-----------|
| ENSG00000214321 | 0.499066092 | 0           | pseudogene       | X  | 17300760  | 17301216  | CBX1P4    |
| ENSG00000214331 | 4.292665995 | 4.528525526 | pseudogene       | 16 | 74366300  | 74402138  |           |
| ENSG00000214335 | 0           | 0.390640832 | pseudogene       | 13 | 59102749  | 59105160  | CTAGE16P  |
| ENSG00000214336 | 1.616589159 | 0.950786998 | pseudogene       | 2  | 88747726  | 88752131  |           |
| ENSG00000214338 | 0.499066092 | 1.518964905 | protein_coding   | 6  | 127759551 | 127840500 | C6orf174  |
| ENSG00000214347 | 0.499066092 | 0           | pseudogene       | 19 | 6393820   | 6412349   |           |
| ENSG00000214353 | 3.911897206 | 3.906303962 | antisense        | 16 | 70789001  | 70807154  |           |
| ENSG00000214354 | 0.499066092 | 0           | pseudogene       | 2  | 87865348  | 87866283  |           |
| ENSG00000214357 | 4.842525946 | 4.841813558 | protein_coding   | 5  | 172068269 | 172118543 | NEURL1B   |
| ENSG00000214359 | 0           | 0.697730409 | pseudogene       | 13 | 50673467  | 50674004  | RPL18P10  |
| ENSG00000214360 | 0           | 1.353254395 | protein_coding   | 5  | 171621176 | 171630456 | EFCAB9    |
| ENSG00000214362 | 1.799000381 | 2.912743273 | pseudogene       | 10 | 97354355  | 97355129  |           |
| ENSG00000214367 | 7.102117104 | 7.405556541 | protein_coding   | 4  | 2229191   | 2243891   | HAUS3     |
| ENSG00000214374 | 0           | 0.390640832 | pseudogene       | 6  | 27932953  | 27933292  | RPLP2P1   |
| ENSG00000214376 | 1.407729925 | 0.950786998 | protein_coding   | 11 | 93551398  | 93583697  | VSTM5     |
| ENSG00000214380 | 0           | 0.390640832 | pseudogene       | 3  | 109634823 | 109635787 |           |
| ENSG00000214389 | 1.799000381 | 1.667587519 | pseudogene       | 7  | 98015113  | 98015896  | RPS3AP26  |
| ENSG00000214391 | 3.448790144 | 3.411459265 | pseudogene       | 11 | 90015728  | 90017340  |           |
| ENSG00000214401 | 1.407729925 | 2.039052734 | protein_coding   | 17 | 44270939  | 44274037  |           |
| ENSG00000214402 | 2.847891871 | 1.353254395 | protein_coding   | 9  | 139876356 | 139880862 | LCNL1     |
| ENSG00000214407 | 0.499066092 | 0.390640832 | lincRNA          | 3  | 101659703 | 101716770 |           |
| ENSG00000214413 | 6.400645076 | 6.896886088 | protein_coding   | 10 | 112658488 | 112679032 | BBIP1     |
| ENSG00000214424 | 0           | 0.390640832 | pseudogene       | 15 | 97300217  | 97301823  | FAM149B2  |
| ENSG00000214425 | 2.57521082  | 2.788380093 | protein_coding   | 17 | 43578685  | 43595264  |           |
| ENSG00000214429 | 1.407729925 | 0.390640832 | pseudogene       | 2  | 78639919  | 78640220  |           |
| ENSG00000214432 | 0.869158192 | 1.802319292 | antisense        | 15 | 91565849  | 91579841  |           |
| ENSG00000214433 | 0.869158192 | 0           | pseudogene       | 15 | 90835194  | 90838915  |           |
| ENSG00000214435 | 5.4452544   | 6.077857763 | protein_coding   | 10 | 104629273 | 104661656 | AS3MT     |
| ENSG00000214439 | 2.847891871 | 2.334191469 | pseudogene       | 7  | 76713203  | 76751433  | FAM185BP  |
| ENSG00000214455 | 6.851544845 | 7.106738413 | pseudogene       | 13 | 45964486  | 45965402  | RCN1P2    |
| ENSG00000214456 | 3.652182994 | 2.912743273 | protein_coding   | 19 | 4522546   | 4535208   | PLIN5     |
| ENSG00000214460 | 0.869158192 | 0.950786998 | pseudogene       | 6  | 86137171  | 86137684  |           |
| ENSG00000214465 | 0.499066092 | 0           | pseudogene       | 2  | 26372073  | 26373600  | SMARCE1P6 |
| ENSG00000214479 | 0           | 0.390640832 | protein_coding   | 6  | 83782692  | 83782854  |           |
| ENSG00000214485 | 1.616589159 | 0           | pseudogene       | 5  | 149473860 | 149474619 |           |
| ENSG00000214491 | 1.407729925 | 1.518964905 | protein_coding   | 22 | 30920465  | 30942669  | SEC14L6   |
| ENSG00000214511 | 1.16343121  | 0.390640832 | protein_coding   | 12 | 51347705  | 51364289  | HIGD1C    |
| ENSG00000214513 | 0.869158192 | 0.697730409 | protein_coding   | 2  | 73429386  | 73439641  | NOTO      |
| ENSG00000214514 | 0.869158192 | 0           | pseudogene       | 17 | 39782579  | 39796451  | KRT42P    |
| ENSG00000214517 | 9.458626558 | 9.54382162  | protein_coding   | 11 | 73882144  | 73965748  | PPME1     |
| ENSG00000214525 | 0.499066092 | 1.353254395 | pseudogene       | 2  | 68755373  | 68756584  |           |
| ENSG00000214526 | 0           | 0.950786998 | pseudogene       | 22 | 23664730  | 23665114  |           |
| ENSG00000214530 | 8.307246212 | 8.398639372 | protein_coding   | 11 | 72465774  | 72505213  | STARD10   |
| ENSG00000214533 | 0.499066092 | 0.390640832 | pseudogene       | 2  | 65893829  | 65894871  |           |
| ENSG00000214534 | 2.238690726 | 1.925536307 | pseudogene       | 11 | 71518637  | 71532594  | ZNF705E   |
| ENSG00000214535 | 2.928422289 | 3.748356452 | pseudogene       | 20 | 21146846  | 21147236  | RPS15AP1  |
| ENSG00000214541 | 0.499066092 | 0           | pseudogene       | 20 | 55176757  | 55177169  |           |
| ENSG00000214546 | 0.869158192 | 0.950786998 | protein_coding   | 17 | 37775866  | 37778766  |           |
| ENSG00000214548 | 0           | 0.390640832 | processed_transc | 14 | 101245747 | 101327368 | MEG3      |
| ENSG00000214552 | 0.499066092 | 0.697730409 | pseudogene       | 3  | 68194154  | 68194780  |           |
| ENSG00000214553 | 1.407729925 | 0.390640832 | antisense        | 17 | 37186159  | 37201194  |           |
| ENSG00000214556 | 0           | 0.390640832 | protein_coding   | 17 | 36991339  | 36997664  | C17orf98  |
| ENSG00000214559 | 0.499066092 | 0.390640832 | antisense        | 4  | 99172839  | 99182781  |           |
| ENSG00000214560 | 0.499066092 | 0           | pseudogene       | 3  | 66687573  | 66687836  |           |
| ENSG00000214561 | 0           | 0.390640832 | pseudogene       | 6  | 58446019  | 58447307  | RBBP4P4   |
| ENSG00000214562 | 3.335220907 | 4.585695337 | protein_coding   | 10 | 89117425  | 89130452  | FAM22D    |
| ENSG00000214575 | 0.499066092 | 0.950786998 | protein_coding   | 15 | 83211951  | 83317612  | CPEB1     |
| ENSG00000214593 | 0           | 1.16600992  | pseudogene       | 9  | 128026124 | 128026369 |           |
| ENSG00000214595 | 4.261916566 | 4.15321211  | protein_coding   | 2  | 54950636  | 55199157  | EML6      |
| ENSG00000214597 | 2.471521042 | 2.334191469 | protein_coding   | 8  | 145575878 | 145579269 |           |
| ENSG00000214612 | 0.869158192 | 0.950786998 | pseudogene       | 20 | 18485277  | 18485710  | RPS19P1   |
| ENSG00000214617 | 0           | 0.390640832 | pseudogene       | 16 | 32888797  | 32896822  | SLC6A10P  |
| ENSG00000214626 | 0.499066092 | 0.697730409 | pseudogene       | 10 | 76414714  | 76415889  |           |

|                 |             |             |                  |   |    |           |                      |
|-----------------|-------------|-------------|------------------|---|----|-----------|----------------------|
| ENSG00000214628 | 0.499066092 | 0.390640832 | pseudogene       | X |    | 96208638  | 96209194             |
| ENSG00000214629 | 0           | 0.390640832 | pseudogene       |   | 10 | 76131293  | 76132174             |
| ENSG00000214650 | 1.616589159 | 1.667587519 | lincRNA          |   | 12 | 124997768 | 124999359            |
| ENSG00000214651 | 0.499066092 | 0           | pseudogene       |   | 9  | 124000954 | 124002290            |
| ENSG00000214652 | 2.35979773  | 2.039052734 | pseudogene       |   | 7  | 63505821  | 63539697             |
| ENSG00000214653 | 0           | 0.390640832 | pseudogene       | X |    | 139114503 | 139115665 HNRNPA3P3  |
| ENSG00000214654 | 5.286269488 | 5.072639111 | pseudogene       |   | 9  | 123555829 | 123561848            |
| ENSG00000214655 | 9.379372099 | 9.594609026 | protein_coding   |   | 10 | 75545383  | 75561551 KIAA0913    |
| ENSG00000214659 | 2.10647801  | 1.518964905 | pseudogene       |   | 11 | 65494410  | 65495685 KRT8P26     |
| ENSG00000214671 | 0.499066092 | 0.950786998 | pseudogene       |   | 4  | 170087423 | 170088268 RPL6P12    |
| ENSG00000214676 | 0.869158192 | 2.039052734 | pseudogene       |   | 4  | 169676967 | 169677533 RPL9P16    |
| ENSG00000214686 | 0           | 0.390640832 | protein_coding   |   | 3  | 51812580  | 51813009 IQCF6       |
| ENSG00000214694 | 3.393122761 | 3.714580548 | protein_coding   |   | 2  | 39117021  | 39202590 ARHGEF33    |
| ENSG00000214700 | 0.869158192 | 0.950786998 | protein_coding   |   | 12 | 27233990  | 27235447 C12orf71    |
| ENSG00000214706 | 9.794315688 | 9.97407346  | protein_coding   |   | 3  | 50325163  | 50330349 IFRD2       |
| ENSG00000214708 | 1.799000381 | 2.721932731 | protein_coding   |   | 17 | 30468245  | 30470137             |
| ENSG00000214717 | 7.983632192 | 7.834933409 | protein_coding   | X |    | 2404455   | 2419008 ZBED1        |
| ENSG00000214719 | 7.657232808 | 7.188980716 | processed_transc |   | 17 | 28903526  | 28964482 LRRC37BP1   |
| ENSG00000214725 | 3.393122761 | 3.532712221 | processed_transc |   | 16 | 29874914  | 29879371             |
| ENSG00000214733 | 1.799000381 | 1.16600992  | antisense        |   | 8  | 144871090 | 144872629            |
| ENSG00000214748 | 5.346128795 | 5.404622322 | pseudogene       | X |    | 136407131 | 136407208            |
| ENSG00000214753 | 9.282163564 | 9.166009895 | protein_coding   |   | 11 | 62480102  | 62494821 HNRNPUL2    |
| ENSG00000214756 | 5.239686603 | 6.217041467 | protein_coding   |   | 11 | 62432781  | 62435968 METTL12     |
| ENSG00000214761 | 1.16343121  | 0.697730409 | pseudogene       |   | 9  | 128357948 | 128358907 HNRNPA1P15 |
| ENSG00000214765 | 6.75547892  | 6.729413443 | pseudogene       |   | 7  | 45763379  | 45808617 SEPT7P2     |
| ENSG00000214770 | 2.847891871 | 3.781359661 | antisense        |   | 14 | 64796149  | 64805317             |
| ENSG00000214773 | 1.799000381 | 0.697730409 | protein_coding   |   | 3  | 47643205  | 47646167             |
| ENSG00000214776 | 4.026095388 | 4.274079748 | pseudogene       |   | 12 | 9620148   | 9728864              |
| ENSG00000214780 | 0.869158192 | 1.16600992  | protein_coding   |   | 11 | 61532328  | 61535285             |
| ENSG00000214783 | 5.889353623 | 5.545764946 | pseudogene       |   | 7  | 43980494  | 44058774 POLR2J4     |
| ENSG00000214784 | 1.16343121  | 1.667587519 | pseudogene       |   | 5  | 110527924 | 110528740            |
| ENSG00000214796 | 3.211941663 | 2.039052734 | pseudogene       |   | 1  | 202820956 | 202830748            |
| ENSG00000214803 | 0.499066092 | 0.390640832 | lincRNA          |   | 8  | 125204912 | 125259639            |
| ENSG00000214807 | 1.407729925 | 0.390640832 | pseudogene       |   | 10 | 126556079 | 126556895            |
| ENSG00000214810 | 0.499066092 | 0.697730409 | pseudogene       |   | 6  | 34187216  | 34187843 CYCSP55     |
| ENSG00000214812 | 0           | 0.390640832 | pseudogene       |   | 1  | 28446958  | 28447832             |
| ENSG00000214814 | 1.16343121  | 3.32456471  | protein_coding   |   | 8  | 124864227 | 125132302 FER1L6     |
| ENSG00000214815 | 3.393122761 | 2.652276565 | pseudogene       |   | 7  | 138125435 | 138126983            |
| ENSG00000214820 | 1.16343121  | 1.667587519 | pseudogene       |   | 3  | 44621430  | 44622518             |
| ENSG00000214822 | 0.499066092 | 0           | pseudogene       |   | 17 | 20404982  | 20407811 KRT16P3     |
| ENSG00000214823 | 0           | 0.390640832 | pseudogene       |   | 13 | 39743773  | 39744088 NXT1P1      |
| ENSG00000214826 | 6.155035276 | 6.310446475 | pseudogene       |   | 12 | 9570309   | 9600825 DDX12P       |
| ENSG00000214827 | 4.352265886 | 4.42790041  | protein_coding   | X |    | 154289897 | 154376212 MTCP1      |
| ENSG00000214832 | 3.274897671 | 0.950786998 | pseudogene       |   | 17 | 20279020  | 20280146             |
| ENSG00000214837 | 6.228441838 | 5.953060722 | processed_transc |   | 1  | 243219131 | 243265046            |
| ENSG00000214846 | 0           | 0.697730409 | pseudogene       |   | 4  | 15732585  | 15733250             |
| ENSG00000214851 | 0.869158192 | 0           | processed_transc |   | 12 | 9208182   | 9217672 C12orf33     |
| ENSG00000214855 | 0.499066092 | 0           | protein_coding   |   | 19 | 45430060  | 45434643             |
| ENSG00000214860 | 1.16343121  | 0.390640832 | protein_coding   |   | 17 | 18281079  | 18292961 EVPLL       |
| ENSG00000214867 | 1.16343121  | 0.697730409 | pseudogene       |   | 21 | 37667471  | 37668000 SRSF9P1     |
| ENSG00000214870 | 2.10647801  | 1.925536307 | processed_transc |   | 7  | 26438213  | 26538594             |
| ENSG00000214872 | 4.230497448 | 4.101879561 | protein_coding   |   | 11 | 57308979  | 57318108 SMTNL1      |
| ENSG00000214875 | 0           | 0.950786998 | pseudogene       |   | 10 | 70750893  | 70751463             |
| ENSG00000214881 | 0.499066092 | 0           | pseudogene       |   | 10 | 70304246  | 70304590 TMEM14D     |
| ENSG00000214883 | 1.16343121  | 0           | pseudogene       |   | 11 | 50368215  | 50381479             |
| ENSG00000214888 | 0           | 0.390640832 | antisense        |   | 9  | 90471930  | 90474314             |
| ENSG00000214894 | 1.407729925 | 2.652276565 | processed_transc |   | 6  | 30766431  | 30798436 LINC00243   |
| ENSG00000214896 | 0           | 0.950786998 | pseudogene       |   | 15 | 53177792  | 53178667 RPSAP55     |
| ENSG00000214897 | 0           | 0.390640832 | pseudogene       | X |    | 152662421 | 152664307            |
| ENSG00000214899 | 2.238690726 | 2.501982735 | protein_coding   |   | 17 | 17072078  | 17088887 C17orf84    |
| ENSG00000214900 | 5.752272083 | 5.09905904  | protein_coding   |   | 14 | 50448430  | 50474238 C14orf182   |
| ENSG00000214917 | 0           | 0.697730409 | pseudogene       |   | 18 | 29655848  | 29656235             |
| ENSG00000214919 | 0           | 0.390640832 | protein_coding   |   | 3  | 155459933 | 155461515            |

|                 |             |             |                  |    |           |           |           |
|-----------------|-------------|-------------|------------------|----|-----------|-----------|-----------|
| ENSG00000214922 | 3.211941663 | 4.274079748 | processed_transc | 6  | 29694378  | 29716826  | HLA-F-AS1 |
| ENSG00000214940 | 0.499066092 | 0           | protein_coding   | 16 | 18411799  | 18441131  |           |
| ENSG00000214941 | 7.066972635 | 7.591499486 | protein_coding   | 17 | 15879874  | 15903031  | ZSWIM7    |
| ENSG00000214944 | 8.913126744 | 9.363507064 | protein_coding   | 5  | 72921983  | 73237818  |           |
| ENSG00000214946 | 2.10647801  | 2.334191469 | protein_coding   | 17 | 15635570  | 15647766  | TBC1D26   |
| ENSG00000214954 | 2.928422289 | 2.334191469 | protein_coding   | 8  | 92114060  | 92231464  | LRRRC69   |
| ENSG00000214955 | 1.16343121  | 0.697730409 | processed_transc | 21 | 35445892  | 35732332  |           |
| ENSG00000214960 | 3.004694206 | 3.608232228 | protein_coding   | 7  | 16130817  | 16460947  | ISPD      |
| ENSG00000214967 | 0.499066092 | 0           | protein_coding   | 16 | 16472912  | 16487811  |           |
| ENSG00000214973 | 0.499066092 | 0.390640832 | pseudogene       | 1  | 27527325  | 27527964  |           |
| ENSG00000214975 | 0.499066092 | 0           | pseudogene       | 6  | 24976647  | 24977210  | PPIAP29   |
| ENSG00000214982 | 3.077135474 | 3.368666104 | pseudogene       | 10 | 51623417  | 51732824  |           |
| ENSG00000214988 | 0           | 0.390640832 | pseudogene       | 4  | 83411976  | 83412788  | RPL7AP26  |
| ENSG00000214992 | 0.499066092 | 0.950786998 | pseudogene       | X  | 118383309 | 118391633 | AKAP16BP  |
| ENSG00000214999 | 2.35979773  | 3.608232228 | protein_coding   | 17 | 7982800   | 7984883   |           |
| ENSG00000215002 | 0.499066092 | 0           | pseudogene       | 10 | 108309864 | 108310879 |           |
| ENSG00000215003 | 1.407729925 | 0.697730409 | pseudogene       | 16 | 16025560  | 16026153  |           |
| ENSG00000215005 | 0           | 0.390640832 | pseudogene       | 21 | 30259602  | 30261594  | HSPD1P7   |
| ENSG00000215006 | 0           | 0.390640832 | pseudogene       | 5  | 68629756  | 68630076  | CHCHD2P2  |
| ENSG00000215007 | 0           | 0.697730409 | pseudogene       | X  | 106594885 | 106596073 | DNAJA1P3  |
| ENSG00000215009 | 3.830412367 | 3.935919592 | protein_coding   | 12 | 7456880   | 7481320   | ACSM4     |
| ENSG00000215012 | 8.219950371 | 8.565427152 | protein_coding   | 22 | 19833661  | 19842419  | C22orf29  |
| ENSG00000215014 | 2.10647801  | 0.697730409 | protein_coding   | 1  | 1510355   | 1511373   |           |
| ENSG00000215018 | 3.989024711 | 3.64455972  | protein_coding   | 7  | 7395834   | 7575484   | COL28A1   |
| ENSG00000215021 | 11.1505816  | 11.10953601 | protein_coding   | 12 | 7074490   | 7079988   | PHB2      |
| ENSG00000215023 | 1.407729925 | 1.667587519 | antisense        | 2  | 242740331 | 242741322 |           |
| ENSG00000215030 | 5.879259127 | 5.863430791 | pseudogene       | 17 | 17286691  | 17287326  |           |
| ENSG00000215032 | 1.616589159 | 0           | pseudogene       | 5  | 60187762  | 60189404  | GNL3LP1   |
| ENSG00000215033 | 1.960915222 | 0.390640832 | protein_coding   | 10 | 47746962  | 47770871  |           |
| ENSG00000215034 | 1.960915222 | 0.390640832 | pseudogene       | 3  | 39255684  | 39256163  |           |
| ENSG00000215035 | 0           | 0.950786998 | pseudogene       | X  | 44335273  | 44336668  | FDPSP5    |
| ENSG00000215039 | 6.749949642 | 6.815578497 | processed_transc | 12 | 6548167   | 6560733   |           |
| ENSG00000215041 | 9.029515185 | 9.549819822 | protein_coding   | 17 | 7218951   | 7232638   | NEURL4    |
| ENSG00000215045 | 0           | 0.950786998 | protein_coding   | 7  | 6537093   | 6591067   | GRID2IP   |
| ENSG00000215049 | 0           | 0.390640832 | pseudogene       | 13 | 30870284  | 30870872  | PRDX2P1   |
| ENSG00000215051 | 0           | 0.390640832 | pseudogene       | 18 | 21289784  | 21290251  |           |
| ENSG00000215057 | 0.499066092 | 1.16600992  | pseudogene       | 6  | 5972645   | 5974245   |           |
| ENSG00000215066 | 0.499066092 | 1.802319292 | protein_coding   | 9  | 6467618   | 6470375   | C9orf38   |
| ENSG00000215067 | 5.107569429 | 6.210997888 | protein_coding   | 17 | 6888442   | 6915653   |           |
| ENSG00000215068 | 4.568725997 | 4.448594745 | lincRNA          | 5  | 43041677  | 43045492  |           |
| ENSG00000215070 | 0.869158192 | 0.697730409 | pseudogene       | X  | 98716600  | 98976047  |           |
| ENSG00000215086 | 0           | 0.697730409 | pseudogene       | 10 | 74677399  | 74678292  |           |
| ENSG00000215093 | 2.57521082  | 2.420525079 | pseudogene       | X  | 85415268  | 85416363  | EEF1A1P29 |
| ENSG00000215099 | 5.672682881 | 6.387491945 | protein_coding   | 17 | 5328469   | 5336196   |           |
| ENSG00000215102 | 0.499066092 | 0           | pseudogene       | X  | 83003833  | 83004947  | TERF1P4   |
| ENSG00000215105 | 3.393122761 | 3.411459265 | pseudogene       | X  | 74960541  | 74966749  | TTC3P1    |
| ENSG00000215114 | 8.362640485 | 8.402622096 | protein_coding   | 8  | 59323823  | 59364060  | UBXN2B    |
| ENSG00000215120 | 0           | 0.697730409 | pseudogene       | X  | 70747664  | 70750075  |           |
| ENSG00000215124 | 0.499066092 | 0           | pseudogene       | 6  | 11861859  | 11863203  |           |
| ENSG00000215126 | 3.004694206 | 3.183544561 | protein_coding   | 9  | 42668608  | 42714962  | CBWD7     |
| ENSG00000215131 | 0.499066092 | 0.950786998 | protein_coding   | 16 | 3543484   | 3545480   | C16orf90  |
| ENSG00000215142 | 0.869158192 | 0           | pseudogene       | 9  | 40491622  | 40633699  |           |
| ENSG00000215146 | 3.211941663 | 1.353254395 | pseudogene       | 10 | 42832238  | 42833689  |           |
| ENSG00000215148 | 0           | 0.390640832 | pseudogene       | 16 | 2848397   | 2855133   |           |
| ENSG00000215154 | 7.04456449  | 7.309836726 | pseudogene       | 16 | 2653351   | 2680495   |           |
| ENSG00000215156 | 1.16343121  | 1.16600992  | pseudogene       | 5  | 34190138  | 34193758  |           |
| ENSG00000215158 | 6.095241663 | 6.223059835 | pseudogene       | 5  | 34164803  | 34244901  |           |
| ENSG00000215179 | 0.869158192 | 0           | pseudogene       | 8  | 47884104  | 47886240  | MAPK6PS4  |
| ENSG00000215182 | 0           | 0.697730409 | protein_coding   | 11 | 1151580   | 1222364   | MUC5AC    |
| ENSG00000215184 | 0.869158192 | 1.16600992  | pseudogene       | 10 | 34964563  | 34964969  |           |
| ENSG00000215187 | 2.35979773  | 2.721932731 | protein_coding   | 9  | 35561828  | 35563896  | FAM166B   |
| ENSG00000215190 | 5.498982484 | 5.709041716 | processed_transc | 6  | 58272352  | 58287779  | GUSBP4    |
| ENSG00000215193 | 9.599022371 | 9.418958081 | protein_coding   | 22 | 18560689  | 18613905  | PEX26     |

|                 |             |             |                  |    |           |                     |
|-----------------|-------------|-------------|------------------|----|-----------|---------------------|
| ENSG00000215196 | 3.004694206 | 3.368666104 | lincRNA          | 5  | 17130137  | 17217508            |
| ENSG00000215198 | 0           | 0.390640832 | pseudogene       | 9  | 35147407  | 35149181            |
| ENSG00000215199 | 3.744048221 | 2.420525079 | pseudogene       | 9  | 34922186  | 34922918 YWHAZP6    |
| ENSG00000215201 | 0.869158192 | 0.390640832 | pseudogene       | 21 | 33826002  | 33830768            |
| ENSG00000215204 | 0.499066092 | 0.390640832 | protein_coding   | 9  | 34830901  | 34838494 FAM205B    |
| ENSG00000215208 | 0           | 1.353254395 | pseudogene       | 12 | 65812511  | 65813807            |
| ENSG00000215210 | 0.869158192 | 1.518964905 | pseudogene       | 9  | 30689103  | 30690270 RBMXP2     |
| ENSG00000215217 | 0           | 0.950786998 | protein_coding   | 5  | 7830491   | 7851603 C5orf49     |
| ENSG00000215221 | 1.407729925 | 1.16600992  | pseudogene       | 9  | 22012154  | 22012535 UBA52P6    |
| ENSG00000215236 | 0.869158192 | 0           | pseudogene       | 9  | 15361391  | 15362132            |
| ENSG00000215241 | 3.211941663 | 3.993387124 | lincRNA          | 12 | 8388011   | 8395160             |
| ENSG00000215244 | 2.35979773  | 1.802319292 | protein_coding   | 10 | 6319650   | 6377938             |
| ENSG00000215246 | 1.616589159 | 0.950786998 | antisense        | 5  | 987295    | 997423              |
| ENSG00000215251 | 9.026088136 | 9.145559356 | protein_coding   | 20 | 3127165   | 3140543 FASTKD5     |
| ENSG00000215252 | 7.657232808 | 8.275187599 | protein_coding   | 15 | 34817408  | 34880704 GOLGA8B    |
| ENSG00000215256 | 5.207774174 | 5.564846512 | processed_transc | 14 | 24407940  | 24458048 C14orf167  |
| ENSG00000215262 | 0           | 0.390640832 | protein_coding   | 8  | 36641842  | 36793646 KCNU1      |
| ENSG00000215263 | 0.499066092 | 0           | pseudogene       | 2  | 42759906  | 42760582            |
| ENSG00000215264 | 0.869158192 | 0           | pseudogene       | 8  | 34180510  | 34181160            |
| ENSG00000215267 | 2.238690726 | 1.353254395 | pseudogene       | 10 | 5317136   | 5330433             |
| ENSG00000215268 | 0.499066092 | 0           | pseudogene       | 22 | 16413687  | 16415946            |
| ENSG00000215270 | 2.762599152 | 3.845183986 | pseudogene       | 22 | 16122720  | 16123768            |
| ENSG00000215271 | 5.91922012  | 6.1803943   | protein_coding   | 14 | 23743250  | 23755326 HOMEZ      |
| ENSG00000215274 | 0.869158192 | 0.697730409 | protein_coding   | X  | 49160148  | 49176323 GAGE10     |
| ENSG00000215277 | 3.004694206 | 3.027231696 | protein_coding   | 14 | 23654525  | 23742686 C14orf164  |
| ENSG00000215283 | 1.616589159 | 1.518964905 | pseudogene       | 9  | 36303496  | 36304921 HMGB3P24   |
| ENSG00000215284 | 0           | 0.697730409 | pseudogene       | X  | 46584599  | 46585253            |
| ENSG00000215296 | 0.499066092 | 0           | pseudogene       | 15 | 33527753  | 33539822 TMC05B     |
| ENSG00000215301 | 11.8458855  | 11.83539567 | protein_coding   | X  | 41192651  | 41223725 DDX3X      |
| ENSG00000215302 | 2.238690726 | 3.133298822 | pseudogene       | 15 | 30762982  | 30799826            |
| ENSG00000215304 | 0           | 0.950786998 | processed_transc | 15 | 32691157  | 32727434 ULK4P1     |
| ENSG00000215305 | 9.423456371 | 9.723317502 | protein_coding   | 20 | 2821349   | 2847378 VPS16       |
| ENSG00000215306 | 0.869158192 | 0.390640832 | protein_coding   | 14 | 23286463  | 23291750            |
| ENSG00000215313 | 0.869158192 | 0.950786998 | pseudogene       | X  | 16216551  | 16217412 RPL6P30    |
| ENSG00000215319 | 1.16343121  | 1.16600992  | pseudogene       | X  | 9786279   | 9787509             |
| ENSG00000215325 | 0           | 0.390640832 | pseudogene       | 5  | 144608374 | 144609617 ASS1P10   |
| ENSG00000215326 | 0.869158192 | 1.16600992  | pseudogene       | 21 | 28515663  | 28516268 GPX1P2     |
| ENSG00000215333 | 0.499066092 | 0.390640832 | pseudogene       | 22 | 44962845  | 44964127 KRT18P23   |
| ENSG00000215346 | 1.16343121  | 1.518964905 | protein_coding   | 8  | 10983980  | 10987745            |
| ENSG00000215347 | 1.407729925 | 2.242360793 | pseudogene       | 22 | 42397073  | 42397970 SLC25A5P1  |
| ENSG00000215349 | 1.16343121  | 0.390640832 | pseudogene       | 13 | 19878733  | 19879765 MRPL3P1    |
| ENSG00000215367 | 1.616589159 | 2.652276565 | pseudogene       | 4  | 1108985   | 1147514 TMED11P     |
| ENSG00000215374 | 0           | 0.390640832 | processed_transc | 8  | 7159133   | 7212876 FAM66B      |
| ENSG00000215375 | 6.228441838 | 5.923798455 | protein_coding   | 4  | 667369    | 675822 MYL5         |
| ENSG00000215381 | 1.16343121  | 0           | pseudogene       | 1  | 23571258  | 23571717            |
| ENSG00000215386 | 0.499066092 | 0           | processed_transc | 21 | 17442842  | 17982094 LINC00478  |
| ENSG00000215388 | 3.502389126 | 3.183544561 | pseudogene       | 20 | 1141228   | 1142341 ACTG1P3     |
| ENSG00000215394 | 1.960915222 | 3.87606762  | lincRNA          | 14 | 19889386  | 19904890 LINC00516  |
| ENSG00000215409 | 0.499066092 | 0           | pseudogene       | 10 | 27620286  | 27630181            |
| ENSG00000215414 | 1.799000381 | 1.518964905 | pseudogene       | Y  | 15398518  | 15399258 PSMA6P1    |
| ENSG00000215417 | 4.437288965 | 4.15321211  | non_coding       | 13 | 92000074  | 92006833 MIR17HG    |
| ENSG00000215421 | 7.149084042 | 7.234379288 | protein_coding   | 18 | 72342919  | 72777628 ZNF407     |
| ENSG00000215424 | 5.909333162 | 5.526427614 | processed_transc | 21 | 47649145  | 47671615 MCM3AP-AS1 |
| ENSG00000215431 | 0           | 0.390640832 | protein_coding   | 18 | 60491423  | 60492724            |
| ENSG00000215440 | 7.035502862 | 7.210344614 | protein_coding   | 20 | 57264187  | 57294294 NPEPL1     |
| ENSG00000215441 | 0           | 0.390640832 | pseudogene       | 9  | 27608385  | 27610743 CTAGE12P   |
| ENSG00000215447 | 5.072559152 | 4.932754837 | processed_transc | 21 | 46707967  | 46711653            |
| ENSG00000215450 | 0.499066092 | 0           | pseudogene       | 20 | 45789477  | 45790339            |
| ENSG00000215452 | 0.499066092 | 0.697730409 | pseudogene       | 20 | 45042867  | 45087915            |
| ENSG00000215458 | 4.689181911 | 4.468996429 | antisense        | 21 | 45225639  | 45232448            |
| ENSG00000215464 | 0           | 0.390640832 | pseudogene       | 22 | 24665316  | 24666102            |
| ENSG00000215467 | 0           | 0.390640832 | pseudogene       | 20 | 42281163  | 42281931 RPL27AP    |
| ENSG00000215472 | 9.597483841 | 10.32827122 | protein_coding   | 18 | 47014858  | 47018906 RPL17      |

|                 |             |             |                  |    |           |           |             |
|-----------------|-------------|-------------|------------------|----|-----------|-----------|-------------|
| ENSG00000215478 | 0.499066092 | 0.390640832 | pseudogene       | 22 | 23701790  | 23729918  | CES5AP1     |
| ENSG00000215481 | 0.499066092 | 0.950786998 | pseudogene       | 22 | 25028882  | 25046799  | BCRP3       |
| ENSG00000215482 | 0.499066092 | 0.697730409 | pseudogene       | 13 | 41744838  | 41745284  | CALM2P3     |
| ENSG00000215483 | 0           | 0.697730409 | lincRNA          | 13 | 41025131  | 41055143  |             |
| ENSG00000215492 | 3.077135474 | 2.420525079 | pseudogene       | 18 | 29991471  | 29993200  | HNRNPA1P7   |
| ENSG00000215493 | 2.847891871 | 3.906303962 | pseudogene       | 22 | 20804409  | 20806111  |             |
| ENSG00000215494 | 3.950976309 | 3.232099092 | protein_coding   | 21 | 43313829  | 43315499  |             |
| ENSG00000215504 | 2.35979773  | 1.802319292 | protein_coding   | 11 | 85563600  | 85565986  |             |
| ENSG00000215513 | 6.112579918 | 5.995870484 | pseudogene       | 22 | 20383524  | 20427835  | PI4KAP1     |
| ENSG00000215515 | 0.499066092 | 0.697730409 | pseudogene       | 13 | 32958797  | 32960245  | IFIT1P1     |
| ENSG00000215527 | 2.35979773  | 2.501982735 | protein_coding   | 18 | 12658205  | 12658712  |             |
| ENSG00000215529 | 2.762599152 | 3.453019579 | protein_coding   | 20 | 31446729  | 31549006  | EFCAB8      |
| ENSG00000215533 | 0           | 0.390640832 | processed_transc | 21 | 30565801  | 30660526  | LINC00189   |
| ENSG00000215548 | 3.871730003 | 4.468996429 | pseudogene       | 9  | 68427861  | 68455375  |             |
| ENSG00000215559 | 1.616589159 | 1.518964905 | pseudogene       | 21 | 15281895  | 15352758  | ANKRD20A11P |
| ENSG00000215565 | 0           | 0.390640832 | pseudogene       | 11 | 129952103 | 129952367 |             |
| ENSG00000215568 | 1.799000381 | 2.420525079 | protein_coding   | 22 | 17442826  | 17489112  | GAB4        |
| ENSG00000215570 | 7.581430769 | 7.281279771 | protein_coding   | 13 | 21946717  | 21949350  |             |
| ENSG00000215571 | 1.799000381 | 1.802319292 | pseudogene       | 13 | 21893231  | 21895005  | GRK6P1      |
| ENSG00000215586 | 1.16343121  | 1.518964905 | pseudogene       | 20 | 7812445   | 7812969   |             |
| ENSG00000215595 | 0.499066092 | 1.353254395 | protein_coding   | 20 | 1184098   | 1188918   | C2orf202    |
| ENSG00000215604 | 0           | 0.390640832 | pseudogene       | 13 | 19041312  | 19059588  | ZNF962P     |
| ENSG00000215606 | 0.499066092 | 0           | pseudogene       | 3  | 141189476 | 141190744 |             |
| ENSG00000215621 | 4.923348194 | 5.41517489  | protein_coding   | 17 | 79780293  | 79784533  |             |
| ENSG00000215630 | 2.471521042 | 2.788380093 | pseudogene       | 5  | 70435716  | 70585611  | GUSBP9      |
| ENSG00000215644 | 3.78787645  | 3.133298822 | protein_coding   | 17 | 79762010  | 79771889  | GCGR        |
| ENSG00000215704 | 0.499066092 | 0.697730409 | protein_coding   | 1  | 15792404  | 15817895  | CELA2B      |
| ENSG00000215712 | 6.298293508 | 6.766973175 | protein_coding   | 6  | 157712662 | 157744633 | TMEM242     |
| ENSG00000215717 | 7.751556534 | 7.768587741 | protein_coding   | 1  | 109633357 | 109639556 | TMEM167B    |
| ENSG00000215720 | 0.499066092 | 0.697730409 | pseudogene       | 1  | 15518324  | 15519341  |             |
| ENSG00000215749 | 0.499066092 | 0           | protein_coding   | 15 | 82930438  | 82939159  |             |
| ENSG00000215760 | 0.499066092 | 0           | pseudogene       | 10 | 116569134 | 116570929 | TAF9BP2     |
| ENSG00000215769 | 5.431503808 | 6.281901708 | protein_coding   | 17 | 62745781  | 62778117  |             |
| ENSG00000215771 | 0.499066092 | 0.390640832 | pseudogene       | 22 | 41585731  | 41586192  |             |
| ENSG00000215784 | 4.568725997 | 4.448594745 | protein_coding   | 1  | 143896452 | 143913143 | FAM72D      |
| ENSG00000215785 | 0           | 0.390640832 | pseudogene       | 1  | 11051035  | 11051854  | CFL1P6      |
| ENSG00000215788 | 7.144876945 | 6.862599506 | protein_coding   | 1  | 6521211   | 6526255   | TNFRSF25    |
| ENSG00000215790 | 4.517578978 | 4.841813558 | protein_coding   | 1  | 1656277   | 1677431   | SLC35E2     |
| ENSG00000215795 | 1.407729925 | 2.039052734 | pseudogene       | 1  | 247347115 | 247348784 |             |
| ENSG00000215796 | 1.407729925 | 1.518964905 | pseudogene       | 1  | 247206093 | 247207323 |             |
| ENSG00000215808 | 0           | 0.390640832 | processed_transc | 1  | 238643684 | 238649323 |             |
| ENSG00000215811 | 0           | 0.697730409 | protein_coding   | 1  | 228698126 | 228700004 |             |
| ENSG00000215812 | 1.16343121  | 1.16600992  | pseudogene       | 1  | 227884501 | 227894412 | ZNF847P     |
| ENSG00000215835 | 1.407729925 | 0.950786998 | pseudogene       | 1  | 166244866 | 166246834 |             |
| ENSG00000215837 | 6.693459083 | 7.096940025 | pseudogene       | 3  | 195384933 | 195415733 | SDHAP2      |
| ENSG00000215838 | 0           | 0.390640832 | processed_transc | 1  | 165667987 | 165679205 |             |
| ENSG00000215840 | 1.799000381 | 1.353254395 | pseudogene       | 1  | 161375858 | 161376872 |             |
| ENSG00000215841 | 0.869158192 | 0           | antisense        | 11 | 72926043  | 72926958  |             |
| ENSG00000215845 | 5.879259127 | 6.304782526 | protein_coding   | 1  | 161007421 | 161008780 | TSTD1       |
| ENSG00000215857 | 0.499066092 | 1.16600992  | protein_coding   | 1  | 150273648 | 150277452 |             |
| ENSG00000215861 | 0.499066092 | 0           | pseudogene       | 1  | 144676874 | 144679969 |             |
| ENSG00000215863 | 0           | 1.667587519 | processed_transc | 1  | 147835127 | 147931933 |             |
| ENSG00000215864 | 1.407729925 | 1.353254395 | pseudogene       | 1  | 120377388 | 120387779 | NBPF7       |
| ENSG00000215867 | 0           | 1.16600992  | pseudogene       | 1  | 112190916 | 112192166 |             |
| ENSG00000215873 | 0           | 0.697730409 | pseudogene       | 1  | 91793926  | 91795070  | FEN1P1      |
| ENSG00000215878 | 0.499066092 | 0           | pseudogene       | 6  | 138723726 | 138724698 |             |
| ENSG00000215883 | 4.491309013 | 4.932754837 | protein_coding   | 1  | 54638009  | 54665709  | CYB5RL      |
| ENSG00000215889 | 0           | 0.697730409 | lincRNA          | 1  | 48567387  | 48627543  | SKINTL      |
| ENSG00000215893 | 0           | 1.16600992  | pseudogene       | 1  | 41564308  | 41564800  |             |
| ENSG00000215895 | 1.616589159 | 1.802319292 | pseudogene       | 1  | 39174626  | 39176564  |             |
| ENSG00000215897 | 0.499066092 | 0.390640832 | protein_coding   | 1  | 32930670  | 32953461  | ZBTB8B      |
| ENSG00000215899 | 3.077135474 | 3.133298822 | pseudogene       | 1  | 31960438  | 31961608  |             |
| ENSG00000215900 | 2.10647801  | 2.334191469 | pseudogene       | 1  | 31567839  | 31568405  | SEPW1P      |

|                 |             |             |                  |    |           |                     |
|-----------------|-------------|-------------|------------------|----|-----------|---------------------|
| ENSG00000215902 | 1.407729925 | 1.16600992  | protein_coding   | 1  | 28527013  | 28527152            |
| ENSG00000215908 | 8.599344916 | 8.936206949 | processed_transc | 1  | 16944751  | 16971178 CROCCP2    |
| ENSG00000215910 | 0.499066092 | 0.950786998 | protein_coding   | 1  | 11821844  | 11849642 C1orf167   |
| ENSG00000215912 | 1.16343121  | 1.518964905 | protein_coding   | 1  | 2567415   | 2706280 TTC34       |
| ENSG00000215915 | 4.543379137 | 4.841813558 | protein_coding   | 1  | 1385069   | 1405538 ATAD3C      |
| ENSG00000215946 | 0           | 0.697730409 | miRNA            | 20 | 62551376  | 62551466 MIR941-1   |
| ENSG00000215972 | 0           | 0.697730409 | miRNA            | 10 | 127531513 | 127531598           |
| ENSG00000215973 | 0           | 0.950786998 | miRNA            | 2  | 176032361 | 176032437 MIR933    |
| ENSG00000215979 | 0           | 0.697730409 | miRNA            | 6  | 26365704  | 26365780            |
| ENSG00000216001 | 0           | 0.390640832 | miRNA            | X  | 133674215 | 133674292 MIR450B   |
| ENSG00000216047 | 0           | 0.390640832 | miRNA            | X  | 130538484 | 130538576           |
| ENSG00000216101 | 0           | 0.697730409 | miRNA            | 6  | 30552109  | 30552194 MIR877     |
| ENSG00000216102 | 0.499066092 | 0           | miRNA            | 19 | 9931204   | 9931281             |
| ENSG00000216109 | 0.869158192 | 0.950786998 | miRNA            | 1  | 155206540 | 155206628           |
| ENSG00000216164 | 0.869158192 | 0           | miRNA            | 20 | 62550733  | 62550823            |
| ENSG00000216168 | 0           | 0.697730409 | miRNA            | 17 | 57066229  | 57066315            |
| ENSG00000216182 | 0           | 0.390640832 | miRNA            | 9  | 119155868 | 119155955           |
| ENSG00000216195 | 0           | 0.390640832 | miRNA            | 20 | 62551096  | 62551186 MIR941-2   |
| ENSG00000216285 | 0           | 0.950786998 | pseudogene       | 12 | 104424557 | 104425321           |
| ENSG00000216307 | 0           | 0.390640832 | pseudogene       | 6  | 4189160   | 4190040             |
| ENSG00000216316 | 0.499066092 | 1.16600992  | pseudogene       | 6  | 119590298 | 119590879           |
| ENSG00000216331 | 2.35979773  | 1.518964905 | pseudogene       | 6  | 26195794  | 26195999 HIST1H1PS1 |
| ENSG00000216360 | 0.499066092 | 0.950786998 | pseudogene       | 6  | 5817654   | 5818599             |
| ENSG00000216368 | 1.407729925 | 0.390640832 | pseudogene       | 6  | 10118685  | 10119485            |
| ENSG00000216378 | 0           | 0.390640832 | pseudogene       | 6  | 100625085 | 100626068           |
| ENSG00000216475 | 0           | 0.390640832 | pseudogene       | 6  | 144578170 | 144578760           |
| ENSG00000216490 | 10.06422571 | 10.56434697 | protein_coding   | 19 | 18284579  | 18288927 IFI30      |
| ENSG00000216588 | 3.274897671 | 3.993387124 | protein_coding   | 19 | 45116940  | 45140081 IGSF23     |
| ENSG00000216616 | 0.499066092 | 0           | pseudogene       | 6  | 47720564  | 47720976            |
| ENSG00000216624 | 1.799000381 | 1.518964905 | pseudogene       | 6  | 166477779 | 166478788 GAPDHP72  |
| ENSG00000216636 | 0.499066092 | 1.353254395 | pseudogene       | 6  | 34584315  | 34585035            |
| ENSG00000216639 | 0.499066092 | 1.353254395 | pseudogene       | 6  | 105746024 | 105746770           |
| ENSG00000216657 | 1.16343121  | 0.697730409 | pseudogene       | 6  | 3978296   | 3979333             |
| ENSG00000216721 | 0           | 0.390640832 | pseudogene       | 2  | 216669454 | 216669704           |
| ENSG00000216740 | 0           | 0.697730409 | pseudogene       | 10 | 66585329  | 66586336 ANXA2P3    |
| ENSG00000216775 | 3.211941663 | 3.906303962 | pseudogene       | 6  | 52530072  | 52531676            |
| ENSG00000216802 | 0           | 0.390640832 | pseudogene       | 6  | 138971363 | 138972110           |
| ENSG00000216809 | 0.499066092 | 0.950786998 | pseudogene       | 6  | 118773632 | 118776155           |
| ENSG00000216813 | 0           | 0.950786998 | pseudogene       | 6  | 47530358  | 47530754            |
| ENSG00000216819 | 0.499066092 | 0.697730409 | pseudogene       | 6  | 3177278   | 3179998             |
| ENSG00000216854 | 0.869158192 | 2.144285137 | pseudogene       | 6  | 56735989  | 56736543            |
| ENSG00000216866 | 3.004694206 | 2.579085888 | pseudogene       | X  | 40794198  | 40794969 RPS2P55    |
| ENSG00000216867 | 0.499066092 | 1.16600992  | pseudogene       | 2  | 111391524 | 111391910           |
| ENSG00000216895 | 4.6658819   | 4.202780776 | protein_coding   | 7  | 155403925 | 155437899           |
| ENSG00000216901 | 1.799000381 | 1.802319292 | pseudogene       | 6  | 28143966  | 28144452            |
| ENSG00000216906 | 1.16343121  | 0.950786998 | pseudogene       | 6  | 150225379 | 150227554           |
| ENSG00000216917 | 0.499066092 | 0           | pseudogene       | 6  | 132101861 | 132102452           |
| ENSG00000216921 | 0.869158192 | 0.950786998 | protein_coding   | 2  | 242836136 | 242844702           |
| ENSG00000216937 | 3.502389126 | 4.566889334 | protein_coding   | 10 | 32735041  | 32863501 CCDC7      |
| ENSG00000216977 | 0.499066092 | 0           | pseudogene       | 6  | 107090338 | 107090803           |
| ENSG00000216990 | 0.869158192 | 1.353254395 | pseudogene       | 6  | 88008490  | 88010165 HSPD1P10   |
| ENSG00000217026 | 0           | 1.353254395 | pseudogene       | 21 | 28792699  | 28793342 RPL10P1    |
| ENSG00000217027 | 1.799000381 | 1.16600992  | pseudogene       | 6  | 144521584 | 144522102           |
| ENSG00000217041 | 0           | 0.390640832 | pseudogene       | 6  | 111021765 | 111022103           |
| ENSG00000217060 | 0           | 0.390640832 | pseudogene       | 6  | 85995794  | 86000567            |
| ENSG00000217075 | 1.616589159 | 0.697730409 | protein_coding   | 2  | 36758948  | 36779411            |
| ENSG00000217078 | 0           | 1.518964905 | pseudogene       | 6  | 16163608  | 16163993            |
| ENSG00000217094 | 1.16343121  | 0           | pseudogene       | 10 | 32477251  | 32477745            |
| ENSG00000217128 | 8.12275821  | 8.327799018 | protein_coding   | 5  | 130761584 | 131132756 FNIP1     |
| ENSG00000217130 | 1.799000381 | 2.144285137 | pseudogene       | 6  | 34711953  | 34712450            |
| ENSG00000217159 | 0           | 0.950786998 | pseudogene       | 6  | 26164265  | 26164551            |
| ENSG00000217165 | 5.175139844 | 5.446377228 | pseudogene       | 6  | 39078097  | 39080728 ANKRD18EP  |
| ENSG00000217181 | 0.499066092 | 0.390640832 | pseudogene       | 6  | 10574982  | 10575460            |



|                 |             |             |                  |    |           |                      |
|-----------------|-------------|-------------|------------------|----|-----------|----------------------|
| ENSG00000217227 | 0.869158192 | 0.390640832 | pseudogene       | 6  | 38555099  | 38556305             |
| ENSG00000217239 | 1.16343121  | 1.518964905 | pseudogene       | 6  | 5788579   | 5788932              |
| ENSG00000217241 | 1.407729925 | 0.950786998 | pseudogene       | 6  | 116774177 | 116774728 CBX3P9     |
| ENSG00000217258 | 1.16343121  | 1.353254395 | processed_transc | 2  | 10592445  | 10595678             |
| ENSG00000217275 | 2.471521042 | 1.518964905 | pseudogene       | 6  | 26202384  | 26202881 RPS10P1     |
| ENSG00000217315 | 0           | 0.390640832 | pseudogene       | 6  | 28001725  | 28002633 OR2W2P      |
| ENSG00000217325 | 2.847891871 | 2.971122874 | pseudogene       | 6  | 126964634 | 126965536            |
| ENSG00000217327 | 0.499066092 | 0           | pseudogene       | 1  | 240175946 | 240176526 RPS7P5     |
| ENSG00000217334 | 0           | 0.697730409 | pseudogene       | 6  | 86441089  | 86441729             |
| ENSG00000217340 | 0           | 0.950786998 | protein_coding   | 6  | 17878685  | 17882609             |
| ENSG00000217372 | 0.499066092 | 0           | pseudogene       | 6  | 153219182 | 153220415            |
| ENSG00000217385 | 0.499066092 | 0           | pseudogene       | 6  | 4702697   | 4704013 PSMC1P11     |
| ENSG00000217442 | 3.146112541 | 3.279072565 | protein_coding   | 22 | 50989541  | 51001334 SYCE3       |
| ENSG00000217447 | 0.499066092 | 1.353254395 | pseudogene       | 6  | 167760960 | 167761541            |
| ENSG00000217488 | 0.499066092 | 0.950786998 | pseudogene       | 6  | 76320674  | 76321661             |
| ENSG00000217495 | 0           | 0.390640832 | pseudogene       | 6  | 143619907 | 143620639            |
| ENSG00000217512 | 0           | 0.697730409 | pseudogene       | 6  | 79777409  | 79777855             |
| ENSG00000217527 | 0.499066092 | 0.390640832 | pseudogene       | 6  | 53201741  | 53202144             |
| ENSG00000217555 | 6.421663777 | 7.337839373 | protein_coding   | 16 | 66586466  | 66601967 CKLF        |
| ENSG00000217576 | 3.989024711 | 3.714580548 | processed_transc | 13 | 52741844  | 52908412 THSD1P1     |
| ENSG00000217612 | 0           | 0.390640832 | pseudogene       | 6  | 145810766 | 145813228            |
| ENSG00000217624 | 0.499066092 | 0           | pseudogene       | X  | 41535013  | 41535747             |
| ENSG00000217643 | 0           | 0.697730409 | pseudogene       | 2  | 26045338  | 26045819             |
| ENSG00000217644 | 1.16343121  | 1.667587519 | pseudogene       | 1  | 33445543  | 33446073             |
| ENSG00000217646 | 0.499066092 | 0.390640832 | pseudogene       | 6  | 27831840  | 27832179 HIST1H2BPS2 |
| ENSG00000217648 | 3.211941663 | 3.081239798 | pseudogene       | 6  | 143663383 | 143664520            |
| ENSG00000217653 | 0.869158192 | 0.390640832 | pseudogene       | 6  | 90524428  | 90525182             |
| ENSG00000217684 | 0           | 0.390640832 | pseudogene       | 6  | 141082666 | 141083396            |
| ENSG00000217702 | 0.499066092 | 0.697730409 | protein_coding   | 2  | 74361599  | 74362521             |
| ENSG00000217716 | 1.960915222 | 1.518964905 | pseudogene       | 9  | 90631215  | 90631708 RPS10P3     |
| ENSG00000217733 | 0.499066092 | 0           | pseudogene       | 6  | 150201098 | 150202708 CCT7P1     |
| ENSG00000217746 | 0           | 0.390640832 | pseudogene       | 6  | 7938663   | 7939555              |
| ENSG00000217783 | 0.499066092 | 0.950786998 | pseudogene       | 6  | 157720077 | 157721158            |
| ENSG00000217791 | 0.499066092 | 0           | pseudogene       | 5  | 53154996  | 53156231 ASS1P9      |
| ENSG00000217801 | 6.604346021 | 7.32390599  | pseudogene       | 1  | 995114    | 1004735              |
| ENSG00000217825 | 1.407729925 | 1.353254395 | protein_coding   | 7  | 154988273 | 154990165            |
| ENSG00000217835 | 0.499066092 | 0           | pseudogene       | X  | 65176131  | 65177038             |
| ENSG00000217862 | 0.499066092 | 1.16600992  | pseudogene       | 6  | 27774836  | 27775114 HIST1H4PS1  |
| ENSG00000217889 | 0           | 0.390640832 | pseudogene       | X  | 152869952 | 152870803            |
| ENSG00000217897 | 0.499066092 | 0.390640832 | pseudogene       | 1  | 39769966  | 39770570             |
| ENSG00000217929 | 0.499066092 | 0.390640832 | pseudogene       | 6  | 142705    | 145059               |
| ENSG00000217930 | 7.491518048 | 7.862183683 | protein_coding   | 16 | 4390252   | 4401373 PAM16        |
| ENSG00000217950 | 0.869158192 | 1.518964905 | pseudogene       | 2  | 132200167 | 132202467            |
| ENSG00000218014 | 1.407729925 | 0.697730409 | pseudogene       | 6  | 72294424  | 72295609             |
| ENSG00000218018 | 1.616589159 | 0.697730409 | antisense        | 20 | 55959216  | 55968118             |
| ENSG00000218052 | 0           | 1.353254395 | pseudogene       | 15 | 85798600  | 85873565             |
| ENSG00000218069 | 0           | 0.390640832 | pseudogene       | 6  | 27748399  | 27748890 RSL24D1P1   |
| ENSG00000218073 | 1.616589159 | 1.16600992  | pseudogene       | 6  | 16161157  | 16161642             |
| ENSG00000218175 | 4.568725997 | 5.306006045 | pseudogene       | 2  | 177065636 | 177065980            |
| ENSG00000218180 | 0           | 0.390640832 | pseudogene       | 6  | 121974941 | 121975836            |
| ENSG00000218208 | 2.10647801  | 2.652276565 | pseudogene       | 6  | 113902703 | 113903149            |
| ENSG00000218226 | 5.346128795 | 5.059245468 | pseudogene       | 6  | 159030738 | 159042668 TATDN2P2   |
| ENSG00000218227 | 2.928422289 | 2.788380093 | pseudogene       | 5  | 177482605 | 177483195            |
| ENSG00000218233 | 1.16343121  | 1.16600992  | pseudogene       | 6  | 117954869 | 117966250 NEPNP      |
| ENSG00000218265 | 0           | 0.950786998 | pseudogene       | 6  | 13521498  | 13522277             |
| ENSG00000218281 | 1.16343121  | 0.950786998 | pseudogene       | 6  | 26233350  | 26233483 HIST1H2APS3 |
| ENSG00000218283 | 2.57521082  | 2.579085888 | pseudogene       | 1  | 220426912 | 220427878 MORF4L1P1  |
| ENSG00000218313 | 0           | 1.16600992  | pseudogene       | 6  | 87883086  | 87884021             |
| ENSG00000218336 | 8.883132512 | 9.315729406 | protein_coding   | 4  | 183065140 | 183724177 ODZ3       |
| ENSG00000218347 | 0.499066092 | 1.16600992  | pseudogene       | 6  | 27490855  | 27492118 HNRNPA1P1   |
| ENSG00000218350 | 0.499066092 | 0           | pseudogene       | 6  | 71874779  | 71875473             |
| ENSG00000218358 | 2.35979773  | 2.420525079 | pseudogene       | 6  | 150319155 | 150326293 RAET1K     |
| ENSG00000218359 | 0           | 0.390640832 | pseudogene       | 6  | 17582265  | 17582536             |

|                 |             |             |                  |    |           |           |             |
|-----------------|-------------|-------------|------------------|----|-----------|-----------|-------------|
| ENSG00000218416 | 2.928422289 | 1.802319292 | protein_coding   | 2  | 241388732 | 241396131 |             |
| ENSG00000218418 | 0.499066092 | 2.242360793 | pseudogene       | 6  | 80774002  | 80777854  |             |
| ENSG00000218422 | 4.19837882  | 4.872768657 | pseudogene       | 4  | 1741078   | 1743830   |             |
| ENSG00000218426 | 4.6658819   | 4.961837817 | pseudogene       | 6  | 153603422 | 153603868 |             |
| ENSG00000218428 | 0           | 0.390640832 | pseudogene       | 6  | 116458221 | 116458735 |             |
| ENSG00000218454 | 0           | 0.390640832 | pseudogene       | 17 | 20674379  | 20674736  | HNRNPA1P19  |
| ENSG00000218475 | 0.499066092 | 1.667587519 | pseudogene       | 6  | 101878287 | 101879429 |             |
| ENSG00000218502 | 1.16343121  | 0.950786998 | pseudogene       | 13 | 99867626  | 99868012  | H2AFZP3     |
| ENSG00000218510 | 5.613019223 | 6.091080508 | lincRNA          | 1  | 22351681  | 22357716  | LINC00339   |
| ENSG00000218521 | 0.499066092 | 0.697730409 | pseudogene       | 6  | 37970608  | 37971089  |             |
| ENSG00000218537 | 1.16343121  | 1.518964905 | protein_coding   | 22 | 24236613  | 24241117  |             |
| ENSG00000218565 | 0           | 0.390640832 | pseudogene       | 6  | 139659184 | 139660717 |             |
| ENSG00000218574 | 0           | 0.390640832 | pseudogene       | 6  | 5609460   | 5610428   |             |
| ENSG00000218582 | 2.762599152 | 2.788380093 | pseudogene       | 6  | 80662722  | 80663728  | GAPDHP63    |
| ENSG00000218586 | 0.869158192 | 0.390640832 | pseudogene       | 7  | 55001392  | 55005877  |             |
| ENSG00000218596 | 0.499066092 | 0.697730409 | pseudogene       | 6  | 157297428 | 157298203 |             |
| ENSG00000218631 | 0.499066092 | 0.697730409 | pseudogene       | 6  | 157793588 | 157794203 |             |
| ENSG00000218632 | 0.499066092 | 0.697730409 | pseudogene       | 6  | 109648378 | 109649117 |             |
| ENSG00000218676 | 0           | 0.390640832 | pseudogene       | 6  | 111751463 | 111752984 | BRD7P4      |
| ENSG00000218682 | 0           | 0.950786998 | pseudogene       | 2  | 26079330  | 26079835  |             |
| ENSG00000218690 | 1.799000381 | 2.242360793 | pseudogene       | 6  | 26272421  | 26272768  | HIST1H2APS4 |
| ENSG00000218713 | 0.869158192 | 0.390640832 | pseudogene       | 6  | 53071396  | 53073495  |             |
| ENSG00000218739 | 7.488200893 | 7.41347308  | protein_coding   | 2  | 37423631  | 37440868  |             |
| ENSG00000218823 | 0.499066092 | 0           | protein_coding   | 7  | 4897364   | 4901625   | PAPOLB      |
| ENSG00000218857 | 0           | 0.390640832 | pseudogene       | 6  | 131505465 | 131506626 |             |
| ENSG00000218890 | 0           | 0.390640832 | pseudogene       | 6  | 66803324  | 66804802  |             |
| ENSG00000218891 | 7.981274537 | 7.966311947 | protein_coding   | 19 | 56088893  | 56092211  | ZNF579      |
| ENSG00000218896 | 0           | 1.667587519 | pseudogene       | 6  | 143757353 | 143757847 |             |
| ENSG00000218902 | 0.499066092 | 1.16600992  | pseudogene       | 20 | 17992599  | 17992928  | PTMAP3      |
| ENSG00000218976 | 0.499066092 | 0           | pseudogene       | 6  | 18366967  | 18368875  |             |
| ENSG00000218980 | 5.563445526 | 5.259915406 | pseudogene       | 6  | 56869330  | 56869598  | FTH1P15     |
| ENSG00000218996 | 0.869158192 | 0           | pseudogene       | 6  | 151256104 | 151256702 |             |
| ENSG00000219023 | 1.407729925 | 0.390640832 | pseudogene       | 6  | 35523650  | 35524041  |             |
| ENSG00000219027 | 0.499066092 | 0.950786998 | pseudogene       | 16 | 1527829   | 1528584   | RPS3AP2     |
| ENSG00000219039 | 0           | 0.390640832 | pseudogene       | 7  | 75464981  | 75465459  |             |
| ENSG00000219085 | 0           | 1.353254395 | pseudogene       | 6  | 70415179  | 70416052  |             |
| ENSG00000219102 | 3.077135474 | 2.579085888 | pseudogene       | 1  | 54440648  | 54441772  |             |
| ENSG00000219135 | 1.407729925 | 1.518964905 | pseudogene       | 6  | 122001118 | 122001605 |             |
| ENSG00000219146 | 0.869158192 | 1.16600992  | pseudogene       | 6  | 154897443 | 154898213 |             |
| ENSG00000219149 | 0           | 0.390640832 | pseudogene       | 9  | 79164198  | 79164684  |             |
| ENSG00000219159 | 0           | 0.390640832 | protein_coding   | 2  | 241625751 | 241629831 |             |
| ENSG00000219163 | 1.407729925 | 0           | pseudogene       | 6  | 53100570  | 53101095  | HMGB1P20    |
| ENSG00000219200 | 5.512107582 | 6.495854971 | protein_coding   | 17 | 6915736   | 6918199   | RNASEK      |
| ENSG00000219201 | 0.499066092 | 0.950786998 | pseudogene       | 1  | 78276507  | 78277621  |             |
| ENSG00000219222 | 0.499066092 | 0           | pseudogene       | 6  | 43277969  | 43278095  |             |
| ENSG00000219249 | 0.499066092 | 0           | pseudogene       | 6  | 159146779 | 159147835 | AMZ2P2      |
| ENSG00000219257 | 0           | 0.390640832 | pseudogene       | 6  | 100498259 | 100499141 |             |
| ENSG00000219274 | 1.16343121  | 1.16600992  | pseudogene       | 16 | 1379079   | 1379778   | RPS20P2     |
| ENSG00000219294 | 0.869158192 | 0           | pseudogene       | 6  | 7986730   | 7988425   | PIP5K1P1    |
| ENSG00000219298 | 0.499066092 | 0           | pseudogene       | 6  | 150298607 | 150300241 |             |
| ENSG00000219329 | 1.16343121  | 1.16600992  | pseudogene       | 6  | 111244769 | 111245310 |             |
| ENSG00000219355 | 1.407729925 | 1.353254395 | pseudogene       | 12 | 120888240 | 120888606 | RPL31P52    |
| ENSG00000219361 | 0.499066092 | 0.950786998 | pseudogene       | 6  | 81179788  | 81180145  |             |
| ENSG00000219375 | 0.499066092 | 0           | pseudogene       | 6  | 7331519   | 7331909   |             |
| ENSG00000219392 | 1.407729925 | 0.950786998 | pseudogene       | 6  | 28083406  | 28084329  |             |
| ENSG00000219395 | 1.616589159 | 3.027231696 | pseudogene       | 6  | 151732394 | 151735080 |             |
| ENSG00000219409 | 0           | 0.390640832 | pseudogene       | 6  | 144719095 | 144719888 |             |
| ENSG00000219410 | 2.57521082  | 0.950786998 | protein_coding   | 12 | 6772426   | 6781235   |             |
| ENSG00000219433 | 1.16343121  | 0           | pseudogene       | 6  | 150115899 | 150116882 |             |
| ENSG00000219445 | 0.499066092 | 0           | processed_transc | 7  | 124869633 | 124904345 |             |
| ENSG00000219448 | 0.499066092 | 0.390640832 | pseudogene       | 6  | 157998119 | 158003309 |             |
| ENSG00000219451 | 1.616589159 | 1.16600992  | pseudogene       | 7  | 20866945  | 20867372  | RPL23P8     |
| ENSG00000219470 | 1.616589159 | 1.353254395 | pseudogene       | 6  | 43506559  | 43507440  |             |

|                 |             |             |                  |    |           |           |            |
|-----------------|-------------|-------------|------------------|----|-----------|-----------|------------|
| ENSG00000219481 | 7.461385447 | 8.049948078 | processed_transc | 1  | 16888818  | 16940083  | NBPF1      |
| ENSG00000219487 | 0.869158192 | 0.697730409 | pseudogene       | 6  | 149433145 | 149433808 |            |
| ENSG00000219507 | 4.77879189  | 4.640685763 | pseudogene       | X  | 147133753 | 147134266 | FTH1P8     |
| ENSG00000219529 | 0           | 0.390640832 | pseudogene       | 11 | 77524365  | 77524722  |            |
| ENSG00000219532 | 0.499066092 | 0.697730409 | pseudogene       | 6  | 132140943 | 132141231 |            |
| ENSG00000219545 | 7.119373418 | 6.870289474 | protein_coding   | 7  | 7680342   | 8043689   |            |
| ENSG00000219553 | 0.499066092 | 0           | pseudogene       | 6  | 149812703 | 149813425 |            |
| ENSG00000219565 | 0           | 0.390640832 | pseudogene       | 6  | 109106892 | 109108256 | ZNF259P1   |
| ENSG00000219607 | 3.004694206 | 2.851901313 | protein_coding   | 6  | 5085720   | 5087455   | PPP1R3G    |
| ENSG00000219608 | 0.499066092 | 0.697730409 | pseudogene       | 20 | 34466398  | 34466655  | HIGD1AP16  |
| ENSG00000219622 | 0           | 0.390640832 | pseudogene       | 6  | 150825947 | 150831436 |            |
| ENSG00000219626 | 3.652182994 | 4.342020395 | protein_coding   | 2  | 24299396  | 24392509  |            |
| ENSG00000219665 | 6.25990527  | 6.332882496 | protein_coding   | 19 | 12098432  | 12157090  |            |
| ENSG00000219700 | 1.16343121  | 0.390640832 | pseudogene       | 6  | 109609774 | 109611706 |            |
| ENSG00000219712 | 0           | 0.390640832 | pseudogene       | 6  | 669081    | 670307    |            |
| ENSG00000219747 | 0.499066092 | 1.518964905 | pseudogene       | 6  | 151420665 | 151421069 |            |
| ENSG00000219755 | 1.616589159 | 1.925536307 | pseudogene       | 6  | 100023588 | 100024332 |            |
| ENSG00000219773 | 0.499066092 | 0.390640832 | pseudogene       | 6  | 112677043 | 112677916 |            |
| ENSG00000219790 | 0           | 0.390640832 | pseudogene       | 6  | 56840402  | 56840902  |            |
| ENSG00000219797 | 2.10647801  | 1.802319292 | pseudogene       | 6  | 31487257  | 31488068  | PPIAP9     |
| ENSG00000219806 | 0.499066092 | 0.390640832 | pseudogene       | 6  | 139935575 | 139936341 | ATP5F1P6   |
| ENSG00000219863 | 0           | 0.390640832 | pseudogene       | 6  | 53219513  | 53219863  |            |
| ENSG00000219881 | 0           | 0.697730409 | pseudogene       | 6  | 70455763  | 70456743  | GAPDHP42   |
| ENSG00000219891 | 3.603959378 | 2.579085888 | pseudogene       | 6  | 28058932  | 28061442  | ZSCAN12P1  |
| ENSG00000219902 | 0           | 0.390640832 | pseudogene       | 6  | 105750328 | 105750698 | RPL35P3    |
| ENSG00000219928 | 1.407729925 | 1.518964905 | pseudogene       | 9  | 90140217  | 90140390  |            |
| ENSG00000219932 | 0.869158192 | 0.390640832 | pseudogene       | 10 | 69634090  | 69634669  | RPL12P8    |
| ENSG00000219951 | 0.869158192 | 0.950786998 | pseudogene       | 6  | 84102135  | 84103128  |            |
| ENSG00000219986 | 1.16343121  | 1.667587519 | pseudogene       | 6  | 6795081   | 6795635   | BTF3P7     |
| ENSG00000219992 | 0.499066092 | 1.518964905 | pseudogene       | 6  | 3754333   | 3755068   |            |
| ENSG00000219993 | 0           | 0.390640832 | pseudogene       | 6  | 7506436   | 7506782   |            |
| ENSG00000220008 | 0.499066092 | 0.390640832 | protein_coding   | 19 | 2289774   | 2308156   | LINGO3     |
| ENSG00000220032 | 2.762599152 | 2.242360793 | protein_coding   | 18 | 74207477  | 74210045  |            |
| ENSG00000220105 | 0           | 0.697730409 | pseudogene       | 9  | 4781475   | 4782078   |            |
| ENSG00000220130 | 0           | 0.390640832 | pseudogene       | 6  | 89711267  | 89711533  |            |
| ENSG00000220157 | 1.616589159 | 0.390640832 | pseudogene       | 5  | 79654899  | 79655859  | HNRNPA1P12 |
| ENSG00000220161 | 2.471521042 | 3.532712221 | protein_coding   | 17 | 18314473  | 18317694  |            |
| ENSG00000220201 | 3.744048221 | 4.406904905 | protein_coding   | 19 | 10415479  | 10420556  | ZGLP1      |
| ENSG00000220205 | 8.421213901 | 8.203944731 | protein_coding   | 17 | 8054134   | 8066864   | VAMP2      |
| ENSG00000220248 | 0           | 0.390640832 | pseudogene       | 22 | 17338509  | 17341608  | ZNF402P    |
| ENSG00000220267 | 0.869158192 | 0           | pseudogene       | 6  | 88985601  | 88986708  | ACTBP8     |
| ENSG00000220305 | 1.799000381 | 1.353254395 | pseudogene       | 6  | 160133833 | 160135017 |            |
| ENSG00000220370 | 4.491309013 | 4.7279204   | pseudogene       | 6  | 95054455  | 95054680  |            |
| ENSG00000220378 | 1.960915222 | 0.697730409 | pseudogene       | 6  | 134618134 | 134619834 | KRT8P42    |
| ENSG00000220392 | 0           | 0.390640832 | pseudogene       | 6  | 111674905 | 111675386 |            |
| ENSG00000220412 | 0           | 2.039052734 | pseudogene       | 6  | 138026560 | 138028338 |            |
| ENSG00000220446 | 0           | 0.390640832 | pseudogene       | 6  | 5291291   | 5291628   |            |
| ENSG00000220472 | 2.238690726 | 2.144285137 | pseudogene       | 6  | 7339072   | 7339801   |            |
| ENSG00000220506 | 0.499066092 | 1.16600992  | pseudogene       | 6  | 111816194 | 111816916 |            |
| ENSG00000220515 | 0           | 0.390640832 | pseudogene       | 6  | 73764820  | 73765580  | PGAM1P10   |
| ENSG00000220517 | 1.407729925 | 1.16600992  | pseudogene       | 6  | 25023475  | 25024711  | ASS1P1     |
| ENSG00000220541 | 0           | 0.697730409 | pseudogene       | X  | 112765753 | 112766265 |            |
| ENSG00000220563 | 1.16343121  | 0.950786998 | pseudogene       | 6  | 86369610  | 86370324  |            |
| ENSG00000220583 | 0.499066092 | 1.667587519 | pseudogene       | 6  | 34231088  | 34231450  | RPL35P2    |
| ENSG00000220614 | 0           | 0.390640832 | pseudogene       | 6  | 43295872  | 43296214  |            |
| ENSG00000220666 | 0.499066092 | 0           | pseudogene       | 6  | 56296756  | 56297979  | RCC2P7     |
| ENSG00000220685 | 1.799000381 | 1.802319292 | pseudogene       | 6  | 5066029   | 5067216   |            |
| ENSG00000220693 | 0.499066092 | 1.16600992  | pseudogene       | 19 | 4477048   | 4479576   |            |
| ENSG00000220694 | 0.499066092 | 0           | pseudogene       | 6  | 127756781 | 127757334 |            |
| ENSG00000220695 | 0           | 0.950786998 | pseudogene       | 6  | 100978152 | 100978928 |            |
| ENSG00000220702 | 0.869158192 | 0.950786998 | protein_coding   | 22 | 44761431  | 44762164  |            |
| ENSG00000220744 | 0           | 0.390640832 | pseudogene       | 6  | 127683658 | 127684548 |            |
| ENSG00000220745 | 0.499066092 | 0           | pseudogene       | 6  | 153280494 | 153280740 |            |

|                 |             |             |                |    |           |                    |
|-----------------|-------------|-------------|----------------|----|-----------|--------------------|
| ENSG00000220749 | 0.499066092 | 0.950786998 | pseudogene     | 1  | 212224829 | 212225371          |
| ENSG00000220771 | 0           | 1.16600992  | pseudogene     | 6  | 21602359  | 21602614           |
| ENSG00000220785 | 6.482942724 | 7.057067116 | pseudogene     | 1  | 32697259  | 32707221 MTMR9LP   |
| ENSG00000220793 | 0.869158192 | 0.950786998 | pseudogene     | 16 | 9250219   | 92507661 RPL21P119 |
| ENSG00000220804 | 3.698846687 | 3.570966319 | pseudogene     | 2  | 243030784 | 243102304          |
| ENSG00000220842 | 2.57521082  | 2.912743273 | pseudogene     | 10 | 122114177 | 122114718          |
| ENSG00000220848 | 2.671945279 | 3.027231696 | pseudogene     | 6  | 149915220 | 149915679 RPS18P9  |
| ENSG00000220867 | 0           | 0.390640832 | pseudogene     | 6  | 158345434 | 158345708          |
| ENSG00000220875 | 0.499066092 | 1.353254395 | pseudogene     | 6  | 26322104  | 26322520 H3F3AP1   |
| ENSG00000220891 | 0           | 0.697730409 | protein_coding | 22 | 22901750  | 22909007           |
| ENSG00000220920 | 0           | 0.697730409 | pseudogene     | 6  | 17953803  | 17954161           |
| ENSG00000220924 | 0           | 0.390640832 | pseudogene     | 4  | 113606211 | 113606659 OSTCP4   |
| ENSG00000220925 | 0.499066092 | 0.390640832 | antisense      | X  | 69368432  | 69369504 IGBP1-AS2 |
| ENSG00000220937 | 0           | 0.950786998 | pseudogene     | 9  | 4944673   | 4945902            |
| ENSG00000220987 | 0           | 0.390640832 | miRNA          | 7  | 95936072  | 95936172           |
| ENSG00000220988 | 1.960915222 | 1.518964905 | snoRNA         | 19 | 51305585  | 51305675 SNORD88C  |
| ENSG00000220996 | 1.407729925 | 0           | miRNA          | 5  | 115378868 | 115378958          |
| ENSG00000220998 | 0           | 0.390640832 | miRNA          | 12 | 105479133 | 105479223          |
| ENSG00000221020 | 0           | 0.390640832 | miRNA          | 17 | 40551027  | 40551109           |
| ENSG00000221027 | 0           | 0.390640832 | miRNA          | 8  | 7996350   | 7996452            |
| ENSG00000221038 | 1.616589159 | 0.390640832 | snRNA          | 17 | 29890787  | 29890913           |
| ENSG00000221044 | 1.799000381 | 0.950786998 | snoRNA         | 17 | 42102389  | 42102591           |
| ENSG00000221046 | 0           | 0.697730409 | snRNA          | 20 | 44407337  | 44407462           |
| ENSG00000221051 | 0           | 0.390640832 | miRNA          | 19 | 40710019  | 40710106           |
| ENSG00000221070 | 0           | 0.950786998 | miRNA          | 5  | 153719592 | 153719686          |
| ENSG00000221079 | 0           | 0.390640832 | miRNA          | 4  | 89415047  | 89415167           |
| ENSG00000221102 | 0.869158192 | 0           | snoRNA         | 14 | 91592769  | 91592897 SNORA11B  |
| ENSG00000221111 | 0.499066092 | 0           | miRNA          | 9  | 30771095  | 30771197           |
| ENSG00000221122 | 0           | 0.390640832 | miRNA          | 4  | 40465733  | 40465821           |
| ENSG00000221164 | 2.57521082  | 2.039052734 | snoRNA         | 10 | 74885838  | 74885965           |
| ENSG00000221174 | 0           | 0.697730409 | miRNA          | 20 | 57180140  | 57180283           |
| ENSG00000221176 | 0           | 1.518964905 | miRNA          | 8  | 129061398 | 129061484 MIR1207  |
| ENSG00000221180 | 0.499066092 | 0           | miRNA          | 14 | 106663421 | 106663529          |
| ENSG00000221181 | 0           | 0.390640832 | miRNA          | 19 | 20473327  | 20473431           |
| ENSG00000221184 | 1.616589159 | 1.518964905 | miRNA          | 10 | 70519075  | 70519171 MIR1254-1 |
| ENSG00000221203 | 0.869158192 | 0           | miRNA          | 1  | 68649201  | 68649293 MIR1262   |
| ENSG00000221214 | 0           | 0.390640832 | miRNA          | 10 | 112748684 | 112748771 MIR548E  |
| ENSG00000221216 | 0.499066092 | 0           | snRNA          | 1  | 28807874  | 28807992           |
| ENSG00000221220 | 0.869158192 | 0           | miRNA          | 20 | 17823227  | 17823372           |
| ENSG00000221230 | 0.869158192 | 0.390640832 | miRNA          | 11 | 94199661  | 94199746 MIR548L   |
| ENSG00000221241 | 2.762599152 | 1.518964905 | snoRNA         | 19 | 51302699  | 51302789 SNORD88A  |
| ENSG00000221258 | 0           | 0.390640832 | miRNA          | 19 | 38544518  | 38544605           |
| ENSG00000221261 | 0.869158192 | 0           | miRNA          | 8  | 129162362 | 129162434 MIR1208  |
| ENSG00000221288 | 3.335220907 | 4.961837817 | miRNA          | 2  | 133014539 | 133014653 MIR663B  |
| ENSG00000221297 | 0.499066092 | 0.697730409 | miRNA          | 9  | 131019986 | 131020068          |
| ENSG00000221299 | 0.869158192 | 0.390640832 | miRNA          | X  | 134029784 | 134029872          |
| ENSG00000221300 | 0           | 0.390640832 | snoRNA         | 2  | 42667517  | 42667576           |
| ENSG00000221309 | 0           | 0.390640832 | miRNA          | 15 | 90838273  | 90838355           |
| ENSG00000221319 | 0.869158192 | 0.390640832 | miRNA          | 20 | 29637162  | 29637300           |
| ENSG00000221322 | 0.869158192 | 0           | miRNA          | 11 | 17095499  | 17095582           |
| ENSG00000221333 | 0.499066092 | 0.390640832 | miRNA          | 11 | 70130061  | 70130176 MIR548K   |
| ENSG00000221337 | 0           | 0.390640832 | miRNA          | 3  | 41690747  | 41690828           |
| ENSG00000221338 | 0.499066092 | 0.697730409 | miRNA          | 11 | 31457017  | 31457110           |
| ENSG00000221355 | 0           | 0.390640832 | miRNA          | 17 | 16185328  | 16185402 MIR1288   |
| ENSG00000221381 | 3.502389126 | 3.714580548 | snoRNA         | 19 | 51302289  | 51302379 SNORD88B  |
| ENSG00000221394 | 0.499066092 | 0.950786998 | miRNA          | 5  | 179225278 | 179225346 MIR1229  |
| ENSG00000221406 | 0           | 0.390640832 | miRNA          | 1  | 224444706 | 224444843 MIR320B2 |
| ENSG00000221410 | 0           | 0.697730409 | miRNA          | 19 | 10662798  | 10662880 MIR1238   |
| ENSG00000221411 | 0.499066092 | 1.353254395 | miRNA          | 19 | 2234061   | 2234148 MIR1227    |
| ENSG00000221413 | 0.499066092 | 0           | miRNA          | 3  | 127383547 | 127383653          |
| ENSG00000221423 | 0.499066092 | 0           | miRNA          | 1  | 33391895  | 33392000           |
| ENSG00000221429 | 0.869158192 | 0           | miRNA          | 7  | 127930057 | 127930144          |
| ENSG00000221439 | 0.499066092 | 0.390640832 | snRNA          | 12 | 890299    | 890424             |

|                 |             |             |                 |    |           |           |           |
|-----------------|-------------|-------------|-----------------|----|-----------|-----------|-----------|
| ENSG00000221462 | 2.471521042 | 2.579085888 | snoRNA          | 17 | 62223697  | 62223831  | SNORA76   |
| ENSG00000221487 | 0.499066092 | 0           | miRNA           | 7  | 99310660  | 99310775  |           |
| ENSG00000221491 | 2.471521042 | 0           | snoRNA          | 12 | 49048165  | 49048301  | SNORA34   |
| ENSG00000221496 | 1.16343121  | 0.390640832 | snoRNA          | 17 | 42381382  | 42381570  |           |
| ENSG00000221500 | 2.928422289 | 3.993387124 | snoRNA          | 6  | 133137941 | 133138016 | SNORD100  |
| ENSG00000221520 | 1.16343121  | 0.950786998 | miRNA           | 7  | 91833329  | 91833412  | MIR1285-1 |
| ENSG00000221526 | 0.499066092 | 0.390640832 | miRNA           | 16 | 67911560  | 67911643  |           |
| ENSG00000221539 | 3.004694206 | 4.127774132 | snoRNA          | 1  | 28905261  | 28905334  | SNORD99   |
| ENSG00000221540 | 0.869158192 | 0.950786998 | miRNA           | 17 | 19247819  | 19247887  | MIR1180   |
| ENSG00000221579 | 0.499066092 | 0           | miRNA           | 2  | 85526157  | 85526241  |           |
| ENSG00000221585 | 0.499066092 | 0.697730409 | miRNA           | 3  | 47891045  | 47891119  | MIR1226   |
| ENSG00000221595 | 0.499066092 | 0           | miRNA           | 19 | 48554681  | 48554766  |           |
| ENSG00000221598 | 0           | 0.390640832 | miRNA           | 22 | 45596835  | 45596900  | MIR1249   |
| ENSG00000221611 | 0           | 0.697730409 | snoRNA          | 12 | 13124987  | 13125077  |           |
| ENSG00000221613 | 0           | 0.390640832 | miRNA           | 9  | 138420457 | 138420546 |           |
| ENSG00000221625 | 0.499066092 | 0.950786998 | miRNA           | 12 | 98999652  | 98999738  |           |
| ENSG00000221634 | 0           | 0.390640832 | miRNA           | 15 | 86313727  | 86313809  | MIR1276   |
| ENSG00000221639 | 0.499066092 | 0           | snoRNA          | 4  | 74129677  | 74129801  |           |
| ENSG00000221643 | 0.499066092 | 0           | snoRNA          | 1  | 203698709 | 203698833 | SNORA77   |
| ENSG00000221656 | 0.499066092 | 0.390640832 | miRNA           | 16 | 2140196   | 2140285   | MIR1225   |
| ENSG00000221662 | 0.499066092 | 0.390640832 | miRNA           | 1  | 19223565  | 19223642  | MIR1290   |
| ENSG00000221671 | 0           | 0.390640832 | miRNA           | 8  | 64121666  | 64121754  |           |
| ENSG00000221676 | 0           | 0.950786998 | snRNA           | 9  | 137029561 | 137029686 | RNU6ATAC  |
| ENSG00000221716 | 0.499066092 | 0.697730409 | snoRNA          | X  | 54840803  | 54840930  | SNORA11   |
| ENSG00000221725 | 0           | 0.390640832 | snRNA           | 16 | 70886601  | 70886717  |           |
| ENSG00000221740 | 3.502389126 | 2.851901313 | snoRNA          | 7  | 22896232  | 22896305  | SNORD93   |
| ENSG00000221743 | 2.471521042 | 1.16600992  | miRNA           | 6  | 36108275  | 36108365  |           |
| ENSG00000221763 | 0           | 1.16600992  | miRNA           | 20 | 34041776  | 34041919  | MIR1289-1 |
| ENSG00000221771 | 2.762599152 | 2.652276565 | miRNA           | 8  | 128972879 | 128972941 | MIR1205   |
| ENSG00000221803 | 2.238690726 | 2.971122874 | snoRNA          | 19 | 48259110  | 48259219  | SNORD23   |
| ENSG00000221806 | 0           | 0.390640832 | snRNA           | 20 | 18591691  | 18591811  |           |
| ENSG00000221817 | 3.830412367 | 3.453019579 | antisense       | 10 | 75255283  | 75264940  |           |
| ENSG00000221818 | 0.869158192 | 0.950786998 | protein_coding  | 8  | 25699246  | 25902913  | EBF2      |
| ENSG00000221819 | 3.448790144 | 2.579085888 | protein_coding  | 16 | 90095316  | 90096309  | C16orf3   |
| ENSG00000221821 | 4.165528823 | 4.976162367 | protein_coding  | 6  | 42858005  | 42858554  | C6orf226  |
| ENSG00000221823 | 9.369490093 | 9.1807733   | protein_coding  | 2  | 68358370  | 68488362  | PPP3R1    |
| ENSG00000221826 | 1.407729925 | 2.242360793 | protein_coding  | 19 | 43225794  | 43244721  | PSG3      |
| ENSG00000221829 | 8.247679379 | 8.574870331 | protein_coding  | 9  | 35073832  | 35080013  | FANCG     |
| ENSG00000221838 | 7.292905885 | 7.632773539 | protein_coding  | 7  | 99699172  | 99707968  | AP4M1     |
| ENSG00000221843 | 2.847891871 | 3.608232228 | protein_coding  | 2  | 27799389  | 27805588  | C2orf16   |
| ENSG00000221844 | 0.499066092 | 0           | pseudogene      | 9  | 76089294  | 76090989  |           |
| ENSG00000221845 | 2.762599152 | 1.667587519 | protein_coding  | 7  | 47694842  | 47701246  | C7orf65   |
| ENSG00000221857 | 2.57521082  | 2.039052734 | protein_coding  | 19 | 35629728  | 35634013  | FXD1      |
| ENSG00000221866 | 1.960915222 | 1.353254395 | protein_coding  | 7  | 131808091 | 132333447 | PLXNA4    |
| ENSG00000221869 | 8.941297632 | 9.11108789  | protein_coding  | 8  | 48649471  | 48651648  | CEBPD     |
| ENSG00000221878 | 0.499066092 | 1.667587519 | polymorphic_pse | 19 | 43428292  | 43441330  | PSG7      |
| ENSG00000221883 | 1.616589159 | 2.971122874 | protein_coding  | 3  | 48955221  | 48956818  | C3orf71   |
| ENSG00000221886 | 5.4452544   | 6.45552765  | protein_coding  | 5  | 159820155 | 159827104 | C5orf54   |
| ENSG00000221887 | 4.131913373 | 4.744751758 | protein_coding  | 18 | 61616535  | 61649008  | HMSD      |
| ENSG00000221890 | 8.066039442 | 8.319396705 | protein_coding  | 22 | 39214457  | 39239987  | NPTXR     |
| ENSG00000221909 | 6.244259325 | 5.938503778 | protein_coding  | 7  | 99143931  | 99156159  | FAM200A   |
| ENSG00000221914 | 9.575770339 | 9.42680162  | protein_coding  | 8  | 26149007  | 26230196  | PPP2R2A   |
| ENSG00000221916 | 2.671945279 | 3.368666104 | protein_coding  | 19 | 49621655  | 49622397  | C19orf73  |
| ENSG00000221923 | 8.869173944 | 8.64603173  | protein_coding  | 19 | 52873170  | 52889048  | ZNF880    |
| ENSG00000221926 | 8.316627558 | 8.180940029 | protein_coding  | 17 | 15531274  | 15587613  | TRIM16    |
| ENSG00000221930 | 0.499066092 | 0.697730409 | pseudogene      | X  | 129629133 | 129630206 | FAM45B    |
| ENSG00000221944 | 5.637181576 | 5.80042639  | protein_coding  | 2  | 233412779 | 233415226 | TIGD1     |
| ENSG00000221946 | 0.869158192 | 0.950786998 | protein_coding  | 19 | 35634154  | 35645205  | FXD7      |
| ENSG00000221947 | 5.958104008 | 5.726093467 | protein_coding  | 8  | 71581600  | 71702606  | XKR9      |
| ENSG00000221949 | 2.238690726 | 2.420525079 | protein_coding  | 12 | 62995531  | 62997214  | C12orf61  |
| ENSG00000221953 | 1.616589159 | 2.144285137 | protein_coding  | 1  | 247273462 | 247275719 | C1orf229  |
| ENSG00000221954 | 0           | 0.390640832 | protein_coding  | 11 | 50003009  | 50004071  | OR4C12    |
| ENSG00000221955 | 7.165790811 | 6.097646709 | protein_coding  | 3  | 124801480 | 124998021 | SLC12A8   |

|                 |             |                              |    |           |           |           |
|-----------------|-------------|------------------------------|----|-----------|-----------|-----------|
| ENSG00000221957 | 0.499066092 | 0 polymorphic_pse            | 19 | 55344131  | 55360024  | KIR2DS4   |
| ENSG00000221962 | 0.869158192 | 0.950786998 protein_coding   | 3  | 152057484 | 152058779 | TMEM14E   |
| ENSG00000221963 | 8.528449672 | 8.618900187 protein_coding   | 22 | 36044442  | 36057404  | APOL6     |
| ENSG00000221968 | 10.20322613 | 10.92686993 protein_coding   | 11 | 61640991  | 61659523  | FADS3     |
| ENSG00000221970 | 0           | 0.697730409 protein_coding   | 7  | 144015218 | 144016150 | OR2A1     |
| ENSG00000221971 | 0.499066092 | 0 pseudogene                 | 7  | 46039220  | 46040377  | TTC4P1    |
| ENSG00000221978 | 9.967488686 | 10.37327626 protein_coding   | 1  | 1321091   | 1334708   | CCNL2     |
| ENSG00000221983 | 12.29989878 | 13.04599158 protein_coding   | 19 | 18682614  | 18688269  | UBA52     |
| ENSG00000221988 | 7.680671792 | 8.043160634 protein_coding   | 6  | 32121218  | 32134011  | PPT2      |
| ENSG00000221989 | 0.499066092 | 0 protein_coding             | 7  | 143806607 | 143807657 | OR2A2     |
| ENSG00000221990 | 5.60078458  | 6.281901708 protein_coding   | 5  | 441645    | 443258    | C5orf55   |
| ENSG00000221994 | 4.842525946 | 4.810179682 protein_coding   | X  | 47842756  | 47931025  | ZNF630    |
| ENSG00000222000 | 0           | 0.390640832 protein_coding   | 2  | 98947852  | 98972468  |           |
| ENSG00000222004 | 0           | 1.16600992 protein_coding    | 7  | 26677490  | 26686889  | C7orf71   |
| ENSG00000222005 | 0.499066092 | 0.697730409 protein_coding   | 2  | 47043807  | 47049796  |           |
| ENSG00000222007 | 0.499066092 | 0 protein_coding             | 2  | 236682499 | 236692031 |           |
| ENSG00000222009 | 5.158541613 | 5.496926774 protein_coding   | 1  | 45274154  | 45281257  | BTBD19    |
| ENSG00000222011 | 5.958104008 | 5.855704078 protein_coding   | 7  | 102389418 | 102467706 | FAM185A   |
| ENSG00000222018 | 1.407729925 | 2.652276565 protein_coding   | 21 | 35772615  | 35773370  |           |
| ENSG00000222019 | 3.393122761 | 3.453019579 protein_coding   | 16 | 90106169  | 90114181  |           |
| ENSG00000222020 | 1.407729925 | 1.518964905 protein_coding   | 2  | 240323130 | 240324058 |           |
| ENSG00000222028 | 0           | 0.390640832 protein_coding   | 14 | 23511376  | 23513269  | PSMB11    |
| ENSG00000222031 | 0           | 0.390640832 protein_coding   | 2  | 151857734 | 151905288 |           |
| ENSG00000222032 | 0           | 0.390640832 lincRNA          | 2  | 238337563 | 238343465 |           |
| ENSG00000222033 | 3.911897206 | 4.101879561 protein_coding   | 2  | 171568961 | 171571077 |           |
| ENSG00000222035 | 0.499066092 | 0.390640832 antisense        | 2  | 202978349 | 202981781 |           |
| ENSG00000222036 | 0           | 0.697730409 protein_coding   | 14 | 19553365  | 19590078  | POTEG     |
| ENSG00000222040 | 2.35979773  | 0.697730409 protein_coding   | 2  | 96778707  | 96781984  | ADRA2B    |
| ENSG00000222041 | 7.444369108 | 7.819127564 processed_transc | 2  | 87754887  | 87906324  | LINC00152 |
| ENSG00000222043 | 2.471521042 | 1.518964905 antisense        | 2  | 178129087 | 178130243 |           |
| ENSG00000222044 | 0.869158192 | 0.390640832 antisense        | 22 | 38428172  | 38430235  |           |
| ENSG00000222046 | 2.471521042 | 2.334191469 protein_coding   | 1  | 32674695  | 32681797  | DCDC2B    |
| ENSG00000222047 | 4.322773689 | 3.081239798 protein_coding   | 10 | 75669727  | 75682535  | C10orf55  |
| ENSG00000222071 | 0           | 0.697730409 miRNA            | 10 | 21785491  | 21785570  | MIR1915   |
| ENSG00000222072 | 0           | 0.390640832 misc_RNA         | 10 | 102666931 | 102667037 |           |
| ENSG00000222076 | 0.499066092 | 0.950786998 snRNA            | 15 | 96289033  | 96289223  | RNU2-3P   |
| ENSG00000222078 | 0           | 0.390640832 misc_RNA         | 6  | 90710941  | 90711225  |           |
| ENSG00000222108 | 1.16343121  | 0.697730409 rRNA             | 10 | 51739425  | 51739540  |           |
| ENSG00000222112 | 1.407729925 | 2.721932731 misc_RNA         | 1  | 33802167  | 33802465  |           |
| ENSG00000222145 | 0           | 0.390640832 snoRNA           | 6  | 89423961  | 89424149  |           |
| ENSG00000222152 | 0.499066092 | 0 snRNA                      | 20 | 34357707  | 34357789  |           |
| ENSG00000222162 | 0.499066092 | 0.390640832 misc_RNA         | 11 | 13374755  | 13375070  |           |
| ENSG00000222164 | 0           | 0.390640832 misc_RNA         | 7  | 18847616  | 18847902  |           |
| ENSG00000222179 | 0.499066092 | 0.390640832 misc_RNA         | 18 | 43569619  | 43569911  |           |
| ENSG00000222197 | 0           | 0.390640832 miRNA            | 10 | 119117867 | 119117967 |           |
| ENSG00000222222 | 0.499066092 | 0.390640832 snRNA            | 1  | 150209315 | 150209504 |           |
| ENSG00000222224 | 0           | 0.390640832 misc_RNA         | 2  | 29150109  | 29150206  |           |
| ENSG00000222248 | 0.869158192 | 0.697730409 rRNA             | 6  | 3088920   | 3089043   | RN5S201   |
| ENSG00000222266 | 1.16343121  | 0.390640832 snRNA            | 5  | 134051173 | 134051272 |           |
| ENSG00000222267 | 0           | 0.697730409 snRNA            | 8  | 20087290  | 20087388  |           |
| ENSG00000222282 | 0.499066092 | 0 snRNA                      | 1  | 38350695  | 38350789  |           |
| ENSG00000222287 | 0           | 0.697730409 snRNA            | 16 | 30712658  | 30712756  |           |
| ENSG00000222296 | 1.16343121  | 0.390640832 misc_RNA         | 9  | 130596230 | 130596321 |           |
| ENSG00000222301 | 1.16343121  | 1.353254395 misc_RNA         | 13 | 103472343 | 103472419 | RNY5P8    |
| ENSG00000222306 | 1.799000381 | 0.950786998 misc_RNA         | 4  | 113195228 | 113195309 |           |
| ENSG00000222344 | 0           | 0.390640832 snRNA            | 2  | 230759062 | 230759169 |           |
| ENSG00000222345 | 1.16343121  | 2.579085888 snoRNA           | 3  | 52725394  | 52725469  |           |
| ENSG00000222346 | 0           | 0.390640832 rRNA             | 7  | 111593708 | 111593820 | RN5S237   |
| ENSG00000222348 | 1.407729925 | 1.16600992 snRNA             | 3  | 10258896  | 10259003  |           |
| ENSG00000222351 | 0           | 0.390640832 misc_RNA         | 9  | 125708267 | 125708373 |           |
| ENSG00000222365 | 4.097495944 | 3.368666104 snoRNA           | 20 | 47896856  | 47896946  | SNORD12B  |
| ENSG00000222378 | 0           | 0.390640832 rRNA             | 1  | 39619836  | 39619968  | RN5S44    |
| ENSG00000222383 | 1.960915222 | 1.802319292 rRNA             | 6  | 10753024  | 10753159  | RN5S203   |

|                 |             |             |            |    |           |                   |
|-----------------|-------------|-------------|------------|----|-----------|-------------------|
| ENSG00000222389 | 0.499066092 |             | 0 snRNA    | 3  | 81558627  | 81558815          |
| ENSG00000222395 | 0.499066092 |             | 0 misc_RNA | 18 | 29843098  | 29843201          |
| ENSG00000222414 | 3.989024711 | 2.912743273 | snRNA      | 10 | 103124602 | 103124792         |
| ENSG00000222432 | 0.499066092 |             | 0 misc_RNA | 7  | 77525197  | 77525309          |
| ENSG00000222448 | 0.869158192 |             | 0 misc_RNA | 5  | 179272832 | 179273152         |
| ENSG00000222460 | 1.16343121  | 1.518964905 | misc_RNA   | 20 | 34231065  | 34231384          |
| ENSG00000222482 | 0           | 0.390640832 | miRNA      | 7  | 99817650  | 99817743          |
| ENSG00000222489 | 1.799000381 | 2.242360793 | snoRNA     | 14 | 20791338  | 20791485          |
| ENSG00000222493 | 1.799000381 | 1.802319292 | misc_RNA   | 12 | 2969115   | 2969199           |
| ENSG00000222494 | 0.499066092 | 0.390640832 | miRNA      | 17 | 37237318  | 37237440          |
| ENSG00000222501 | 3.004694206 | 2.652276565 | snRNA      | 8  | 129022628 | 129022857         |
| ENSG00000222503 | 0.499066092 |             | 0 misc_RNA | 10 | 105432916 | 105433023         |
| ENSG00000222509 | 0.499066092 |             | 0 misc_RNA | 2  | 171639677 | 171639781         |
| ENSG00000222533 | 0           | 0.390640832 | snRNA      | 5  | 180728968 | 180729071         |
| ENSG00000222545 | 0.869158192 | 0.390640832 | miRNA      | 17 | 70710522  | 70710610          |
| ENSG00000222561 | 0           | 0.697730409 | snRNA      | 11 | 948421    | 948524            |
| ENSG00000222578 | 0           | 0.390640832 | rRNA       | 11 | 95573181  | 95573288          |
| ENSG00000222588 | 0.499066092 | 0.390640832 | snoRNA     | 10 | 120820495 | 120820623         |
| ENSG00000222614 | 0           | 0.390640832 | misc_RNA   | 19 | 47239569  | 47239676          |
| ENSG00000222627 | 0.499066092 | 0.390640832 | snRNA      | 3  | 127793916 | 127794092         |
| ENSG00000222629 | 0.869158192 |             | 0 snRNA    | 10 | 127579135 | 127579247         |
| ENSG00000222640 | 0.869158192 |             | 0 snRNA    | 14 | 70827609  | 70827805          |
| ENSG00000222650 | 0           | 0.390640832 | snRNA      | 1  | 236431080 | 236431258         |
| ENSG00000222690 | 0           | 0.390640832 | miRNA      | 18 | 47013743  | 47013792 MIR1539  |
| ENSG00000222724 | 1.16343121  | 0.950786998 | snRNA      | 2  | 88315873  | 88316066          |
| ENSG00000222726 | 0.869158192 | 0.390640832 | snRNA      | 13 | 21186300  | 21186477 RNU2-7P  |
| ENSG00000222730 | 4.464551814 | 3.411459265 | miRNA      | 19 | 36821351  | 36821449          |
| ENSG00000222732 | 0           | 0.390640832 | miRNA      | 5  | 171706206 | 171706319         |
| ENSG00000222747 | 0           | 0.390640832 | rRNA       | 13 | 21943929  | 21944038 RN5S25   |
| ENSG00000222764 | 0           | 0.390640832 | misc_RNA   | 6  | 141807278 | 141807549         |
| ENSG00000222808 | 1.407729925 | 0.950786998 | snRNA      | 17 | 75148643  | 75148756          |
| ENSG00000222872 | 0.499066092 |             | 0 snRNA    | 3  | 42263332  | 42263457          |
| ENSG00000222881 | 2.238690726 | 2.242360793 | misc_RNA   | 17 | 38547484  | 38547590          |
| ENSG00000222894 | 0.869158192 | 0.390640832 | miRNA      | 6  | 30584006  | 30584082          |
| ENSG00000222898 | 2.471521042 | 0.390640832 | misc_RNA   | 8  | 62544239  | 62544571          |
| ENSG00000222915 | 1.16343121  | 1.16600992  | snRNA      | 22 | 30817034  | 30817137          |
| ENSG00000222937 | 3.146112541 | 2.039052734 | snoRNA     | 5  | 137894659 | 137894728         |
| ENSG00000222942 | 0           | 0.390640832 | misc_RNA   | 3  | 41808107  | 41808411          |
| ENSG00000222954 | 0.499066092 |             | 0 miRNA    | 4  | 56796148  | 56796239          |
| ENSG00000222969 | 1.16343121  | 0.697730409 | misc_RNA   | 13 | 98856089  | 98856446 RN7SKP8  |
| ENSG00000223001 | 0           | 0.390640832 | snRNA      | 6  | 89773219  | 89773409          |
| ENSG00000223023 | 0           | 0.390640832 | misc_RNA   | 18 | 20604559  | 20604666          |
| ENSG00000223044 | 0           | 0.697730409 | snRNA      | 6  | 82920055  | 82920157          |
| ENSG00000223060 | 1.16343121  | 0.697730409 | misc_RNA   | 19 | 56616785  | 56616879          |
| ENSG00000223086 | 0.869158192 |             | 0 rRNA     | 4  | 10117380  | 10117508 RN5S155  |
| ENSG00000223117 | 2.10647801  | 1.802319292 | misc_RNA   | 3  | 190359952 | 190360292         |
| ENSG00000223120 | 0           | 0.390640832 | misc_RNA   | 15 | 97385299  | 97385614          |
| ENSG00000223138 | 0           | 0.697730409 | rRNA       | 18 | 9923917   | 9924018           |
| ENSG00000223174 | 0.499066092 | 0.950786998 | misc_RNA   | 14 | 77356606  | 77356956          |
| ENSG00000223198 | 0           | 0.697730409 | snRNA      | 2  | 232366701 | 232366912         |
| ENSG00000223214 | 0.499066092 |             | 0 miRNA    | 8  | 15379393  | 15379475          |
| ENSG00000223220 | 0.499066092 |             | 0 misc_RNA | 8  | 71693149  | 71693243          |
| ENSG00000223224 | 0           | 0.390640832 | snoRNA     | 16 | 71792305  | 71792390 SNORD71  |
| ENSG00000223225 | 0           | 0.390640832 | snRNA      | 4  | 119527605 | 119527708         |
| ENSG00000223244 | 1.616589159 | 1.667587519 | miRNA      | 19 | 1816158   | 1816237 MIR1909   |
| ENSG00000223247 | 0.499066092 | 0.697730409 | snRNA      | 3  | 73160143  | 73160333          |
| ENSG00000223254 | 2.10647801  |             | 0 misc_RNA | 1  | 85729979  | 85730085          |
| ENSG00000223263 | 0           | 0.950786998 | snRNA      | 1  | 67882897  | 67883001          |
| ENSG00000223271 | 0           | 0.390640832 | misc_RNA   | 15 | 66640614  | 66640713          |
| ENSG00000223279 | 0           | 0.697730409 | snRNA      | 10 | 111629616 | 111629750 RNU4-5P |
| ENSG00000223284 | 0.499066092 |             | 0 snRNA    | 19 | 41213960  | 41214068          |
| ENSG00000223298 | 0.499066092 | 0.697730409 | misc_RNA   | 13 | 95963084  | 95963209 RNY3P8   |
| ENSG00000223300 | 0           | 0.390640832 | misc_RNA   | 14 | 74324764  | 74324868          |

|                 |             |             |                    |    |           |                     |
|-----------------|-------------|-------------|--------------------|----|-----------|---------------------|
| ENSG00000223305 | 0.869158192 |             | 0 misc_RNA         | 4  | 56406669  | 56407002            |
| ENSG00000223306 | 0.499066092 | 0.390640832 | snRNA              | 1  | 225928977 | 225929084           |
| ENSG00000223309 | 1.16343121  |             | 0 snRNA            | X  | 48816440  | 48816543            |
| ENSG00000223313 | 1.16343121  | 0.390640832 | snRNA              | 15 | 40821769  | 40821872            |
| ENSG00000223336 | 2.471521042 | 0.950786998 | snRNA              | 13 | 46948536  | 46948725 RNU2-6P    |
| ENSG00000223343 | 1.16343121  |             | 0 antisense        | 3  | 49022482  | 49027421            |
| ENSG00000223345 | 1.407729925 | 0.697730409 | processed_transc   | 1  | 120906028 | 120915073 HIST2H2BA |
| ENSG00000223346 | 2.35979773  | 2.501982735 | lincRNA            | 20 | 29638246  | 29641792            |
| ENSG00000223356 | 1.960915222 | 1.667587519 | antisense          | 1  | 156682004 | 156682966           |
| ENSG00000223361 | 0           | 0.950786998 | pseudogene         | 5  | 17353804  | 17354733 FTH1P10    |
| ENSG00000223374 | 3.004694206 | 2.501982735 | antisense          | 2  | 242290755 | 242292519           |
| ENSG00000223379 | 0.499066092 |             | 0 lincRNA          | 9  | 45004879  | 45023236            |
| ENSG00000223380 | 9.398051829 | 9.951595627 | processed_transc   | 1  | 145096220 | 145116922 SEC22B    |
| ENSG00000223385 | 6.328285199 | 6.926693689 | processed_transc   | 17 | 13932609  | 13972775 COX10-AS1  |
| ENSG00000223387 | 0.499066092 | 0.950786998 | lincRNA            | 3  | 172278678 | 172313397           |
| ENSG00000223390 | 1.407729925 | 0.697730409 | antisense          | 1  | 52499063  | 52509951            |
| ENSG00000223393 | 0.499066092 |             | 0 antisense        | 1  | 231010592 | 231014761           |
| ENSG00000223396 | 2.238690726 | 1.518964905 | processed_transc   | 1  | 201487831 | 201499602 RPS10P7   |
| ENSG00000223401 | 1.799000381 | 2.144285137 | lincRNA            | 3  | 187461474 | 187463208           |
| ENSG00000223403 | 0           | 0.390640832 | lincRNA            | 14 | 101536248 | 101539274           |
| ENSG00000223409 | 0           | 1.353254395 | pseudogene         | 3  | 65829565  | 65830121 RPL17P17   |
| ENSG00000223416 | 0           | 0.390640832 | pseudogene         | 1  | 58521805  | 58522152            |
| ENSG00000223424 | 0           | 0.390640832 | antisense          | 4  | 156275368 | 156281613           |
| ENSG00000223427 | 0.499066092 |             | 0 pseudogene       | 2  | 80389554  | 80390261            |
| ENSG00000223429 | 0           | 0.390640832 | pseudogene         | 1  | 52627858  | 52628698            |
| ENSG00000223431 | 0.869158192 | 1.16600992  | pseudogene         | 21 | 45892778  | 45893622 MTND6P21   |
| ENSG00000223440 | 0.499066092 |             | 0 antisense        | 9  | 32633452  | 32648683            |
| ENSG00000223442 | 1.16343121  | 1.16600992  | antisense          | 5  | 131966281 | 131999964           |
| ENSG00000223445 | 0           | 0.390640832 | pseudogene         | 7  | 14110160  | 14111005            |
| ENSG00000223459 | 2.847891871 | 3.64455972  | pseudogene         | 7  | 143295133 | 143305111 FAM115B   |
| ENSG00000223460 | 0.499066092 | 0.390640832 | pseudogene         | 13 | 29880915  | 29881922 GAPDHP69   |
| ENSG00000223461 | 1.16343121  | 2.039052734 | antisense          | 22 | 19109042  | 19112016            |
| ENSG00000223466 | 0.499066092 | 0.390640832 | lincRNA            | 2  | 196397759 | 196403405           |
| ENSG00000223473 | 4.261916566 | 3.368666104 | lincRNA            | 7  | 65956083  | 65958553            |
| ENSG00000223474 | 2.10647801  | 1.667587519 | protein_coding     | 1  | 26145212  | 26147288            |
| ENSG00000223476 | 1.799000381 | 0.697730409 | pseudogene         | 7  | 64393651  | 64393994 VN1R42P    |
| ENSG00000223477 | 4.642199401 | 2.334191469 | lincRNA            | 10 | 47096454  | 47099716            |
| ENSG00000223478 | 5.331395195 | 5.98174124  | antisense          | 9  | 131486724 | 131495473           |
| ENSG00000223482 | 7.392081667 | 7.768587741 | antisense          | 10 | 88963610  | 89102369            |
| ENSG00000223485 | 4.593635215 | 5.004391715 | lincRNA            | 6  | 169558187 | 169563019           |
| ENSG00000223486 | 0.869158192 | 0.697730409 | processed_transc X |    | 39868529  | 39871435            |
| ENSG00000223488 | 0.499066092 |             | 0 pseudogene       | 21 | 23808610  | 23810669 MAPK6PS2   |
| ENSG00000223491 | 0.499066092 |             | 0 pseudogene       | 1  | 148000213 | 148000494           |
| ENSG00000223492 | 0.499066092 |             | 0 antisense        | 20 | 51785182  | 51796089            |
| ENSG00000223496 | 7.893726093 | 7.780879746 | protein_coding     | 16 | 70284134  | 70285833 EXOSC6     |
| ENSG00000223500 | 0.499066092 | 0.390640832 | pseudogene         | 7  | 134813196 | 134814437           |
| ENSG00000223501 | 9.05999771  | 9.319245234 | protein_coding     | 6  | 33218049  | 33239824 VPS52      |
| ENSG00000223503 | 0           | 1.802319292 | pseudogene         | 1  | 155560392 | 155561053           |
| ENSG00000223505 | 0.499066092 | 0.390640832 | pseudogene         | 1  | 203804708 | 203805040           |
| ENSG00000223508 | 2.57521082  | 2.721932731 | pseudogene         | 8  | 163251    | 163707 RPL23AP53    |
| ENSG00000223509 | 4.097495944 | 4.528525526 | pseudogene         | 15 | 32814894  | 32829127            |
| ENSG00000223510 | 1.616589159 | 1.353254395 | protein_coding     | 17 | 14138990  | 14140179 CDRT15     |
| ENSG00000223511 | 5.4452544   | 6.434933235 | lincRNA            | X  | 1851477   | 1874878             |
| ENSG00000223518 | 0.869158192 | 0.390640832 | pseudogene         | 15 | 37090797  | 37110660 CSNK1A1P1  |
| ENSG00000223519 | 0.869158192 | 2.334191469 | protein_coding     | 1  | 246939531 | 246952963           |
| ENSG00000223522 | 3.274897671 | 2.971122874 | antisense          | 2  | 28530558  | 28533326            |
| ENSG00000223529 | 2.928422289 | 3.411459265 | pseudogene         | 3  | 183744157 | 183745544 EEF1A1P8  |
| ENSG00000223540 | 0.499066092 |             | 0 pseudogene       | 10 | 123473121 | 123473508 RPS15AP5  |
| ENSG00000223546 | 5.301468762 | 5.824376633 | processed_transc X |    | 102024089 | 102140334           |
| ENSG00000223547 | 7.985986001 | 7.960920138 | protein_coding     | 19 | 12175514  | 12192380 ZNF844     |
| ENSG00000223549 | 0.869158192 | 1.16600992  | pseudogene         | 2  | 120972757 | 120974855 MTND5P28  |
| ENSG00000223551 | 3.989024711 | 4.385599336 | protein_coding     | 9  | 131104432 | 131105049 TMSL4     |
| ENSG00000223552 | 4.026095388 | 2.039052734 | antisense          | 3  | 46406446  | 46448550            |



|                 |             |             |                  |    |           |           |            |
|-----------------|-------------|-------------|------------------|----|-----------|-----------|------------|
| ENSG00000223553 | 0.499066092 | 0.390640832 | pseudogene       | 22 | 20956882  | 21011201  | SMPD4P1    |
| ENSG00000223558 | 2.671945279 | 2.242360793 | pseudogene       | 7  | 63545938  | 63546954  | TRIM60P17  |
| ENSG00000223559 | 1.960915222 | 1.925536307 | pseudogene       | 7  | 56355923  | 56359118  |            |
| ENSG00000223561 | 0.499066092 | 0.390640832 | processed_transc | 7  | 25632971  | 25790614  |            |
| ENSG00000223566 | 1.16343121  | 0.697730409 | pseudogene       | 7  | 63028121  | 63045453  |            |
| ENSG00000223571 | 0.499066092 | 0.390640832 | sense_intronic   | X  | 2252336   | 2254451   | DHRX-IT1   |
| ENSG00000223572 | 4.097495944 | 0.390640832 | protein_coding   | 15 | 43886225  | 43991420  | CKMT1A     |
| ENSG00000223573 | 5.207774174 | 5.372493443 | processed_transc | 19 | 5558178   | 5568045   | PLAC2      |
| ENSG00000223575 | 0           | 0.390640832 | pseudogene       | 1  | 119627531 | 119628577 | RBMX2P3    |
| ENSG00000223576 | 0.869158192 | 1.16600992  | antisense        | 13 | 20417276  | 20417812  | ZMYM5-AS1  |
| ENSG00000223579 | 0.869158192 | 0           | lincRNA          | 22 | 20632132  | 20661407  |            |
| ENSG00000223583 | 1.407729925 | 1.353254395 | pseudogene       | 1  | 26781144  | 26781678  |            |
| ENSG00000223584 | 0           | 0.390640832 | pseudogene       | 7  | 90261220  | 90261882  |            |
| ENSG00000223586 | 0.499066092 | 0           | processed_transc | 6  | 134142285 | 134172938 |            |
| ENSG00000223588 | 0           | 0.390640832 | pseudogene       | 2  | 132534140 | 132534601 |            |
| ENSG00000223598 | 0.869158192 | 0           | processed_transc | 6  | 151409239 | 151549582 |            |
| ENSG00000223599 | 0.499066092 | 1.16600992  | pseudogene       | 1  | 153824582 | 153825890 |            |
| ENSG00000223624 | 1.16343121  | 0.390640832 | pseudogene       | 1  | 26215461  | 26215600  |            |
| ENSG00000223634 | 0.499066092 | 0           | lincRNA          | 2  | 23580387  | 23583247  |            |
| ENSG00000223635 | 0           | 0.390640832 | antisense        | 1  | 229644248 | 229650019 |            |
| ENSG00000223638 | 0.499066092 | 0           | protein_coding   | 19 | 56270380  | 56274541  | RFPL4A     |
| ENSG00000223650 | 0.869158192 | 1.518964905 | pseudogene       | X  | 73325407  | 73327793  | UHRF2P1    |
| ENSG00000223652 | 0           | 0.390640832 | antisense        | 5  | 122422943 | 122425994 |            |
| ENSG00000223653 | 0.499066092 | 1.518964905 | processed_transc | 1  | 85742398  | 85913807  |            |
| ENSG00000223658 | 0           | 0.390640832 | pseudogene       | 2  | 43902292  | 43903461  |            |
| ENSG00000223662 | 0.499066092 | 0           | antisense        | 21 | 15954523  | 15970624  | SAMSN1-AS1 |
| ENSG00000223668 | 1.16343121  | 0.697730409 | pseudogene       | 3  | 39400036  | 39401413  | EEF1A1P24  |
| ENSG00000223685 | 0           | 1.353254395 | lincRNA          | 13 | 38624954  | 38717369  |            |
| ENSG00000223692 | 1.407729925 | 1.16600992  | sense_intronic   | 21 | 47882384  | 47889219  | DIP2A-IT1  |
| ENSG00000223694 | 0           | 0.390640832 | pseudogene       | 1  | 240333455 | 240334591 | ADH5P3     |
| ENSG00000223695 | 0.499066092 | 2.334191469 | lincRNA          | 22 | 36784671  | 36792562  |            |
| ENSG00000223697 | 1.616589159 | 1.16600992  | antisense        | 8  | 133850375 | 133856543 |            |
| ENSG00000223700 | 0           | 0.390640832 | pseudogene       | 2  | 84104851  | 84105677  |            |
| ENSG00000223701 | 0           | 0.390640832 | processed_transc | 6  | 150211239 | 150240644 |            |
| ENSG00000223703 | 0           | 0.697730409 | pseudogene       | 2  | 91924752  | 91955465  |            |
| ENSG00000223704 | 2.762599152 | 3.368666104 | lincRNA          | 22 | 27254597  | 27261749  |            |
| ENSG00000223705 | 7.686472517 | 7.705505903 | pseudogene       | 7  | 75039605  | 75046066  | NSUN5P1    |
| ENSG00000223711 | 0.499066092 | 1.353254395 | antisense        | 3  | 195270871 | 195277400 |            |
| ENSG00000223715 | 0           | 0.390640832 | lincRNA          | 3  | 176321931 | 176353320 |            |
| ENSG00000223718 | 0.869158192 | 0           | pseudogene       | 7  | 135344787 | 135345401 |            |
| ENSG00000223722 | 1.407729925 | 1.353254395 | pseudogene       | 12 | 31907651  | 31908055  |            |
| ENSG00000223723 | 0.499066092 | 0.697730409 | pseudogene       | X  | 36980269  | 36981498  |            |
| ENSG00000223724 | 0.499066092 | 0           | pseudogene       | 13 | 49618215  | 49620930  | RAD17P2    |
| ENSG00000223725 | 1.616589159 | 2.501982735 | antisense        | 2  | 208104588 | 208394519 |            |
| ENSG00000223732 | 0           | 0.697730409 | lincRNA          | 13 | 45620725  | 45657260  |            |
| ENSG00000223739 | 0           | 0.390640832 | pseudogene       | 2  | 65738905  | 65739210  |            |
| ENSG00000223740 | 0.499066092 | 0.697730409 | pseudogene       | 7  | 56593121  | 56593806  |            |
| ENSG00000223741 | 2.847891871 | 3.679994897 | pseudogene       | 21 | 37858281  | 37859709  | PSMD4P1    |
| ENSG00000223745 | 6.275383355 | 6.549526374 | processed_transc | 1  | 93727743  | 93811582  |            |
| ENSG00000223749 | 6.604346021 | 7.053694091 | processed_transc | X  | 133677367 | 133680662 |            |
| ENSG00000223750 | 0           | 0.697730409 | pseudogene       | 20 | 1645929   | 1688846   |            |
| ENSG00000223751 | 1.799000381 | 1.16600992  | lincRNA          | 2  | 742488    | 747767    |            |
| ENSG00000223756 | 4.230497448 | 3.813624741 | pseudogene       | 11 | 3402191   | 3430208   | TSSC2      |
| ENSG00000223759 | 3.603959378 | 3.493416095 | processed_transc | 1  | 149672997 | 149677287 |            |
| ENSG00000223764 | 3.335220907 | 2.652276565 | processed_transc | 1  | 852250    | 855072    |            |
| ENSG00000223768 | 4.75690578  | 4.961837817 | non_coding       | 21 | 46713200  | 46717269  | LINC00205  |
| ENSG00000223770 | 0.499066092 | 0           | antisense        | 7  | 81638493  | 81659271  | MIR1255B1  |
| ENSG00000223773 | 4.642199401 | 4.744751758 | pseudogene       | X  | 2527389   | 2575270   | CD99P1     |
| ENSG00000223774 | 0.499066092 | 0           | antisense        | 1  | 201862970 | 201869106 |            |
| ENSG00000223776 | 0.499066092 | 1.518964905 | antisense        | 1  | 236686369 | 236687808 | LGALS8-AS1 |
| ENSG00000223779 | 1.799000381 | 2.039052734 | processed_transc | 1  | 149239551 | 149265510 |            |
| ENSG00000223784 | 4.437288965 | 2.039052734 | lincRNA          | 10 | 6779344   | 6780988   |            |
| ENSG00000223787 | 0           | 1.16600992  | pseudogene       | 1  | 93046038  | 93046404  |            |

|                 |             |             |                  |    |           |           |            |
|-----------------|-------------|-------------|------------------|----|-----------|-----------|------------|
| ENSG00000223791 | 0           | 0.697730409 | antisense        | 3  | 23845515  | 23848396  | UBE2E1-AS1 |
| ENSG00000223795 | 0           | 0.390640832 | lincRNA          | 9  | 137397318 | 137413288 |            |
| ENSG00000223797 | 3.603959378 | 3.935919592 | processed_transc | 3  | 40355293  | 40494820  | ENTPD3-AS1 |
| ENSG00000223799 | 1.407729925 | 2.144285137 | processed_transc | 21 | 34636178  | 34638565  |            |
| ENSG00000223802 | 0           | 1.667587519 | protein_coding   | 19 | 18979361  | 19007488  | CERS1      |
| ENSG00000223803 | 0.869158192 | 0.390640832 | pseudogene       | 3  | 186617987 | 186618346 |            |
| ENSG00000223804 | 1.407729925 | 2.334191469 | processed_transc | 1  | 143647638 | 143745417 |            |
| ENSG00000223807 | 0           | 0.390640832 | pseudogene       | 9  | 32926049  | 32926448  |            |
| ENSG00000223811 | 0           | 0.390640832 | lincRNA          | 6  | 113678205 | 113689146 |            |
| ENSG00000223812 | 5.538004898 | 6.434933235 | lincRNA          | 3  | 191275113 | 191308145 |            |
| ENSG00000223813 | 1.407729925 | 1.518964905 | processed_transc | 7  | 29554385  | 29603286  |            |
| ENSG00000223814 | 0.869158192 | 1.353254395 | lincRNA          | 1  | 48226804  | 48231219  |            |
| ENSG00000223819 | 0           | 0.390640832 | pseudogene       | X  | 100055291 | 100055773 |            |
| ENSG00000223820 | 2.238690726 | 2.334191469 | pseudogene       | 10 | 89577685  | 89605369  | CFL1P1     |
| ENSG00000223822 | 2.238690726 | 2.501982735 | pseudogene       | 21 | 24762579  | 24763317  | EEF1A1P1   |
| ENSG00000223825 | 3.077135474 | 2.039052734 | pseudogene       | 2  | 203066103 | 203066609 |            |
| ENSG00000223829 | 1.16343121  | 0.390640832 | processed_transc | 7  | 47009300  | 47067079  |            |
| ENSG00000223831 | 3.554067925 | 3.748356452 | sense_intronic   | 22 | 30994296  | 31002674  |            |
| ENSG00000223837 | 1.960915222 | 2.144285137 | sense_intronic   | 6  | 32938080  | 32938594  | BRD2-IT1   |
| ENSG00000223839 | 2.57521082  | 1.16600992  | processed_transc | 9  | 42466317  | 42474236  | FAM95B1    |
| ENSG00000223842 | 1.16343121  | 1.518964905 | lincRNA          | 1  | 219395590 | 219398839 |            |
| ENSG00000223849 | 1.799000381 | 0.950786998 | pseudogene       | 9  | 97885803  | 97886150  |            |
| ENSG00000223855 | 2.238690726 | 3.32456471  | processed_transc | 7  | 560028    | 564869    |            |
| ENSG00000223861 | 2.928422289 | 3.081239798 | pseudogene       | 1  | 151529922 | 151530416 |            |
| ENSG00000223864 | 0.869158192 | 0.390640832 | pseudogene       | 20 | 37606354  | 37607065  | NPM1P19    |
| ENSG00000223865 | 0.869158192 | 0           | protein_coding   | 6  | 33043703  | 33054978  | HLA-DPB1   |
| ENSG00000223872 | 0           | 1.16600992  | lincRNA          | 7  | 157294016 | 157296271 |            |
| ENSG00000223877 | 1.16343121  | 2.144285137 | pseudogene       | 15 | 22440227  | 22440848  |            |
| ENSG00000223878 | 3.146112541 | 3.993387124 | pseudogene       | 17 | 15410180  | 15410668  |            |
| ENSG00000223882 | 1.16343121  | 0.390640832 | antisense        | 3  | 183724126 | 183729207 | ABCC5-AS1  |
| ENSG00000223886 | 1.616589159 | 2.652276565 | pseudogene       | 7  | 105170656 | 105171118 |            |
| ENSG00000223891 | 4.883502971 | 5.751299057 | processed_transc | 20 | 42839600  | 42854667  |            |
| ENSG00000223896 | 0.499066092 | 0           | pseudogene       | 1  | 93221366  | 93222509  | CCNJ2P2    |
| ENSG00000223901 | 0.869158192 | 1.667587519 | antisense        | 21 | 47640183  | 47641992  |            |
| ENSG00000223903 | 0.869158192 | 0.390640832 | pseudogene       | 2  | 220562521 | 220562936 |            |
| ENSG00000223907 | 0           | 0.390640832 | lincRNA          | 1  | 31984036  | 31989846  |            |
| ENSG00000223910 | 0.499066092 | 0.390640832 | processed_transc | 10 | 44124265  | 44170151  | ZNF32-AS3  |
| ENSG00000223916 | 0.499066092 | 0.950786998 | pseudogene       | 3  | 43526464  | 43527372  |            |
| ENSG00000223917 | 0           | 0.390640832 | pseudogene       | 2  | 96152228  | 96154375  |            |
| ENSG00000223922 | 1.799000381 | 1.353254395 | pseudogene       | 2  | 39037574  | 39038796  | ASS1P2     |
| ENSG00000223923 | 0           | 0.390640832 | antisense        | 2  | 218843430 | 218857338 |            |
| ENSG00000223935 | 1.16343121  | 0.390640832 | antisense        | 2  | 64622354  | 64680932  |            |
| ENSG00000223940 | 0           | 0.390640832 | pseudogene       | X  | 151648049 | 151649496 | KRT8P8     |
| ENSG00000223945 | 1.407729925 | 1.353254395 | pseudogene       | 1  | 150025846 | 150027016 |            |
| ENSG00000223947 | 2.10647801  | 1.667587519 | antisense        | 2  | 101610138 | 101618706 |            |
| ENSG00000223949 | 3.146112541 | 1.925536307 | antisense        | 1  | 64560125  | 64636980  |            |
| ENSG00000223956 | 1.16343121  | 0.390640832 | lincRNA          | 1  | 56880635  | 56881638  |            |
| ENSG00000223959 | 8.120617457 | 8.712778563 | pseudogene       | 16 | 90038994  | 90068569  | AFG3L1P    |
| ENSG00000223960 | 6.005279909 | 6.293387477 | processed_transc | 2  | 179278666 | 179303866 |            |
| ENSG00000223963 | 0.499066092 | 0           | pseudogene       | 1  | 240932721 | 240934834 | PRKRIRP8   |
| ENSG00000223968 | 0           | 0.390640832 | pseudogene       | 3  | 27665693  | 27665947  |            |
| ENSG00000223969 | 0           | 1.925536307 | antisense        | 7  | 90219933  | 90226667  |            |
| ENSG00000223973 | 1.16343121  | 1.353254395 | pseudogene       | 2  | 112141329 | 112142569 |            |
| ENSG00000223974 | 1.960915222 | 1.16600992  | pseudogene       | 7  | 64011876  | 64012444  |            |
| ENSG00000223975 | 1.407729925 | 2.144285137 | lincRNA          | 21 | 44885189  | 44887178  |            |
| ENSG00000223979 | 0.499066092 | 0.390640832 | lincRNA          | 17 | 17577340  | 17581002  | SMCR2      |
| ENSG00000223981 | 0.499066092 | 0           | pseudogene       | 7  | 74619641  | 74620426  | PHBP6      |
| ENSG00000223984 | 1.16343121  | 0.950786998 | pseudogene       | 10 | 21913521  | 21915215  |            |
| ENSG00000223991 | 0.499066092 | 0           | antisense        | 2  | 241920932 | 241925489 |            |
| ENSG00000223998 | 1.16343121  | 0.390640832 | sense_intronic   | 6  | 86270033  | 86270928  |            |
| ENSG00000224001 | 0           | 0.390640832 | pseudogene       | 9  | 100997010 | 100997818 |            |
| ENSG00000224003 | 0.869158192 | 0           | pseudogene       | 22 | 26043228  | 26045199  |            |
| ENSG00000224004 | 0.869158192 | 0.950786998 | pseudogene       | 14 | 54457818  | 54458713  | ATP5C1P1   |

|                 |             |             |                  |    |           |           |
|-----------------|-------------|-------------|------------------|----|-----------|-----------|
| ENSG00000224005 | 1.616589159 | 1.16600992  | pseudogene       | 10 | 75473354  | 75473609  |
| ENSG00000224007 | 0.499066092 | 0.697730409 | pseudogene       | 2  | 149053225 | 149054248 |
| ENSG00000224011 | 0.499066092 | 0.697730409 | pseudogene       | 17 | 58804526  | 58804843  |
| ENSG00000224014 | 0           | 0.390640832 | pseudogene       | 1  | 247338558 | 247338827 |
| ENSG00000224016 | 0           | 0.390640832 | pseudogene       | 7  | 149588280 | 149606793 |
| ENSG00000224017 | 0.499066092 | 0           | lincRNA          | 7  | 41141202  | 41173105  |
| ENSG00000224019 | 0           | 0.697730409 | pseudogene       | 2  | 186821314 | 186821790 |
| ENSG00000224020 | 2.671945279 | 3.532712221 | antisense        | 9  | 127420746 | 127460910 |
| ENSG00000224021 | 0           | 0.390640832 | antisense        | 1  | 32817122  | 32819143  |
| ENSG00000224023 | 1.407729925 | 2.144285137 | processed_transc | 10 | 127389005 | 127408135 |
| ENSG00000224025 | 0.499066092 | 0.697730409 | pseudogene       | 9  | 71224041  | 71226893  |
| ENSG00000224031 | 0           | 0.697730409 | antisense        | X  | 102881004 | 102881420 |
| ENSG00000224032 | 6.907250452 | 7.026422172 | non_coding       | 5  | 111496223 | 111499973 |
| ENSG00000224034 | 0.499066092 | 0.697730409 | lincRNA          | 10 | 5307996   | 5313199   |
| ENSG00000224037 | 1.616589159 | 1.518964905 | processed_transc | 1  | 234845005 | 234855723 |
| ENSG00000224040 | 0           | 1.16600992  | pseudogene       | 1  | 182911250 | 182911539 |
| ENSG00000224043 | 2.238690726 | 1.802319292 | antisense        | 2  | 135493034 | 135676280 |
| ENSG00000224046 | 3.448790144 | 3.279072565 | processed_transc | 7  | 86780739  | 86781736  |
| ENSG00000224050 | 3.004694206 | 2.039052734 | lincRNA          | 22 | 32669407  | 32673173  |
| ENSG00000224051 | 8.223944437 | 7.582164879 | protein_coding   | 1  | 1260136   | 1264277   |
| ENSG00000224055 | 0.869158192 | 1.353254395 | pseudogene       | 15 | 44355709  | 44356511  |
| ENSG00000224057 | 0.499066092 | 1.518964905 | antisense        | 7  | 55247443  | 55256627  |
| ENSG00000224063 | 1.616589159 | 2.420525079 | processed_transc | 2  | 187867947 | 188419390 |
| ENSG00000224066 | 1.407729925 | 1.353254395 | antisense        | 1  | 32670370  | 32672415  |
| ENSG00000224067 | 2.238690726 | 1.802319292 | pseudogene       | 9  | 114565260 | 114565710 |
| ENSG00000224072 | 1.799000381 | 1.667587519 | pseudogene       | X  | 46313532  | 46316634  |
| ENSG00000224073 | 0           | 0.950786998 | lincRNA          | 6  | 160060339 | 160061133 |
| ENSG00000224074 | 0.499066092 | 0.390640832 | processed_transc | 3  | 24137760  | 24144738  |
| ENSG00000224077 | 0.869158192 | 0.390640832 | antisense        | 11 | 116969703 | 116978886 |
| ENSG00000224078 | 9.422587759 | 9.145559356 | processed_transc | 15 | 25224704  | 25664609  |
| ENSG00000224079 | 2.10647801  | 1.518964905 | antisense        | 7  | 1114086   | 1117672   |
| ENSG00000224080 | 1.960915222 | 1.925536307 | pseudogene       | 3  | 37185003  | 37185449  |
| ENSG00000224081 | 1.960915222 | 0.950786998 | processed_transc | 1  | 95104017  | 95285837  |
| ENSG00000224083 | 0.499066092 | 0           | pseudogene       | 9  | 5096666   | 5098193   |
| ENSG00000224086 | 3.989024711 | 5.187895122 | antisense        | 22 | 22292609  | 22297799  |
| ENSG00000224093 | 1.407729925 | 2.039052734 | antisense        | 1  | 94057756  | 94071130  |
| ENSG00000224094 | 2.238690726 | 2.788380093 | pseudogene       | 3  | 45201266  | 45201667  |
| ENSG00000224097 | 1.799000381 | 1.353254395 | pseudogene       | 4  | 39481875  | 39483525  |
| ENSG00000224110 | 0.499066092 | 0.390640832 | pseudogene       | 8  | 130740990 | 130742691 |
| ENSG00000224113 | 4.437288965 | 3.279072565 | protein_coding   | 17 | 33332275  | 33333756  |
| ENSG00000224114 | 0.499066092 | 0.697730409 | pseudogene       | 1  | 206869182 | 206869614 |
| ENSG00000224116 | 2.238690726 | 2.579085888 | antisense        | 7  | 41733514  | 41818986  |
| ENSG00000224117 | 0           | 0.390640832 | pseudogene       | 13 | 31127807  | 31128830  |
| ENSG00000224119 | 0.499066092 | 0           | sense_intronic   | 11 | 70412492  | 70417428  |
| ENSG00000224121 | 0           | 0.390640832 | pseudogene       | 2  | 223769358 | 223769773 |
| ENSG00000224124 | 2.471521042 | 2.039052734 | pseudogene       | 22 | 25041133  | 25055114  |
| ENSG00000224126 | 2.57521082  | 2.242360793 | pseudogene       | 17 | 18580574  | 18581072  |
| ENSG00000224132 | 0           | 0.390640832 | protein_coding   | 2  | 238165734 | 238166319 |
| ENSG00000224137 | 1.616589159 | 0.950786998 | lincRNA          | 2  | 208527099 | 208531748 |
| ENSG00000224138 | 3.146112541 | 2.851901313 | antisense        | 7  | 126990182 | 126991577 |
| ENSG00000224142 | 0           | 0.390640832 | sense_intronic   | X  | 109548648 | 109550449 |
| ENSG00000224152 | 2.762599152 | 2.334191469 | antisense        | 2  | 160471807 | 160473593 |
| ENSG00000224155 | 0.499066092 | 0           | pseudogene       | 7  | 56372371  | 56373219  |
| ENSG00000224157 | 0.869158192 | 0.950786998 | antisense        | 6  | 28864307  | 28865099  |
| ENSG00000224165 | 3.211941663 | 3.608232228 | processed_transc | 2  | 25194259  | 25262563  |
| ENSG00000224172 | 1.16343121  | 0.950786998 | pseudogene       | 7  | 64196311  | 64197121  |
| ENSG00000224173 | 0.499066092 | 0           | lincRNA          | 2  | 67789199  | 67801176  |
| ENSG00000224177 | 1.799000381 | 1.802319292 | lincRNA          | 2  | 11534107  | 11543203  |
| ENSG00000224183 | 0           | 0.390640832 | pseudogene       | 1  | 25620655  | 25621134  |
| ENSG00000224184 | 1.16343121  | 0           | lincRNA          | 2  | 11988748  | 12718474  |
| ENSG00000224186 | 3.448790144 | 3.411459265 | protein_coding   | 5  | 134368970 | 134691744 |
| ENSG00000224189 | 2.762599152 | 3.027231696 | processed_transc | 2  | 177037923 | 177053686 |
| ENSG00000224194 | 0.499066092 | 0           | antisense        | 2  | 15808808  | 15820608  |

|                 |             |             |                  |    |           |           |             |
|-----------------|-------------|-------------|------------------|----|-----------|-----------|-------------|
| ENSG00000224195 | 2.671945279 | 1.667587519 | antisense        | 10 | 75573276  | 75574495  |             |
| ENSG00000224207 | 0           | 0.697730409 | pseudogene       | 4  | 103655515 | 103655772 |             |
| ENSG00000224208 | 1.616589159 | 1.518964905 | pseudogene       | X  | 70534762  | 70535729  |             |
| ENSG00000224209 | 0.869158192 | 0           | processed_transc | 1  | 63624707  | 63782902  | LINC00466   |
| ENSG00000224215 | 0.499066092 | 0.697730409 | antisense        | 10 | 23632886  | 23634110  |             |
| ENSG00000224216 | 0           | 0.390640832 | antisense        | X  | 154564167 | 154581271 |             |
| ENSG00000224221 | 0           | 0.390640832 | pseudogene       | 6  | 74100761  | 74101490  |             |
| ENSG00000224222 | 0.869158192 | 0.697730409 | lincRNA          | 10 | 71754382  | 71767592  |             |
| ENSG00000224224 | 0           | 0.697730409 | pseudogene       | X  | 18883889  | 18884672  |             |
| ENSG00000224232 | 1.799000381 | 1.16600992  | pseudogene       | 2  | 242417731 | 242418408 |             |
| ENSG00000224238 | 1.16343121  | 0.697730409 | sense_intronic   | 1  | 119590028 | 119607408 | WARS2-IT1   |
| ENSG00000224245 | 0.869158192 | 1.16600992  | pseudogene       | 9  | 97258557  | 97275161  |             |
| ENSG00000224251 | 0.869158192 | 0.390640832 | antisense        | 10 | 5038045   | 5039572   |             |
| ENSG00000224255 | 0.499066092 | 0           | pseudogene       | 1  | 52645518  | 52646221  |             |
| ENSG00000224259 | 2.471521042 | 2.652276565 | lincRNA          | 1  | 159931008 | 159948851 |             |
| ENSG00000224260 | 0.499066092 | 0           | antisense        | 1  | 209701800 | 209741018 |             |
| ENSG00000224261 | 1.960915222 | 2.242360793 | pseudogene       | 1  | 160236129 | 160237016 |             |
| ENSG00000224263 | 0           | 0.390640832 | pseudogene       | 3  | 11920304  | 11920603  |             |
| ENSG00000224271 | 2.57521082  | 2.912743273 | processed_transc | 22 | 48027423  | 48251349  |             |
| ENSG00000224272 | 2.671945279 | 2.788380093 | processed_transc | 2  | 242749407 | 242753111 |             |
| ENSG00000224273 | 0.499066092 | 0.697730409 | pseudogene       | 7  | 75747043  | 75761505  |             |
| ENSG00000224274 | 0           | 0.390640832 | pseudogene       | 20 | 15600139  | 15600464  | ENSAP1      |
| ENSG00000224276 | 0           | 0.390640832 | antisense        | 1  | 155961181 | 155971578 |             |
| ENSG00000224280 | 0.499066092 | 0.950786998 | pseudogene       | 7  | 16623407  | 16626382  |             |
| ENSG00000224281 | 3.077135474 | 3.813624741 | processed_transc | X  | 118599997 | 118603061 | SLC25A5-AS1 |
| ENSG00000224282 | 0.499066092 | 0.697730409 | pseudogene       | 5  | 31822668  | 31823243  |             |
| ENSG00000224287 | 5.741167503 | 5.792353798 | pseudogene       | 2  | 234774083 | 234777090 | MSL3P1      |
| ENSG00000224289 | 0.499066092 | 0           | pseudogene       | 10 | 91122051  | 91123244  | IFIT6P      |
| ENSG00000224292 | 3.211941663 | 1.802319292 | antisense        | X  | 48364911  | 48367226  |             |
| ENSG00000224294 | 0.499066092 | 0.390640832 | lincRNA          | X  | 43036243  | 43085847  |             |
| ENSG00000224295 | 1.407729925 | 0.950786998 | pseudogene       | 11 | 5539671   | 5546185   |             |
| ENSG00000224299 | 1.407729925 | 0.697730409 | pseudogene       | 2  | 202415247 | 202415772 |             |
| ENSG00000224301 | 0           | 0.390640832 | antisense        | 10 | 64883698  | 64885297  |             |
| ENSG00000224303 | 0           | 0.390640832 | lincRNA          | 9  | 43144980  | 43160008  |             |
| ENSG00000224304 | 0.499066092 | 0.390640832 | lincRNA          | 9  | 36332947  | 36334969  |             |
| ENSG00000224308 | 0.869158192 | 1.802319292 | antisense        | 1  | 152902516 | 152921686 |             |
| ENSG00000224312 | 1.407729925 | 1.802319292 | pseudogene       | 6  | 29962214  | 29963091  | MCCD1P2     |
| ENSG00000224315 | 0.499066092 | 0.697730409 | pseudogene       | 1  | 8846262   | 8846994   |             |
| ENSG00000224316 | 2.238690726 | 2.334191469 | pseudogene       | 7  | 65238607  | 65267054  |             |
| ENSG00000224321 | 2.238690726 | 2.652276565 | pseudogene       | 1  | 16119291  | 16119780  |             |
| ENSG00000224324 | 0.869158192 | 0.697730409 | pseudogene       | 7  | 158415880 | 158416141 |             |
| ENSG00000224328 | 0.869158192 | 0.390640832 | antisense        | 6  | 30670844  | 30680961  | MDC1-AS1    |
| ENSG00000224331 | 0           | 0.390640832 | pseudogene       | 2  | 165543797 | 165544106 |             |
| ENSG00000224333 | 0.499066092 | 0.390640832 | pseudogene       | 1  | 32867710  | 32868716  | GAPDHP20    |
| ENSG00000224340 | 0.869158192 | 0           | pseudogene       | 1  | 10114503  | 10114839  |             |
| ENSG00000224341 | 0           | 0.390640832 | pseudogene       | X  | 118011849 | 118013148 |             |
| ENSG00000224342 | 0.499066092 | 0.390640832 | lincRNA          | 2  | 208038358 | 208087514 |             |
| ENSG00000224345 | 3.146112541 | 2.579085888 | antisense        | 6  | 88410228  | 88411243  | AKIRIN2-AS1 |
| ENSG00000224356 | 0.499066092 | 0.390640832 | processed_transc | 13 | 101189577 | 101232371 |             |
| ENSG00000224358 | 1.799000381 | 2.242360793 | processed_transc | 1  | 165738166 | 165744413 |             |
| ENSG00000224361 | 0           | 0.390640832 | protein_coding   | 2  | 23729913  | 23747214  |             |
| ENSG00000224366 | 0.499066092 | 0           | pseudogene       | 19 | 45073550  | 45073810  |             |
| ENSG00000224370 | 1.799000381 | 0.950786998 | pseudogene       | 7  | 56448669  | 56449005  |             |
| ENSG00000224376 | 3.78787645  | 3.96493948  | processed_transc | 2  | 232253687 | 232259702 |             |
| ENSG00000224381 | 0.499066092 | 0           | antisense        | 22 | 29867930  | 29874059  |             |
| ENSG00000224383 | 2.847891871 | 1.925536307 | protein_coding   | 17 | 62075711  | 62081664  | C17orf72    |
| ENSG00000224387 | 0           | 0.390640832 | antisense        | 1  | 2423739   | 2424697   |             |
| ENSG00000224388 | 0           | 0.390640832 | antisense        | 21 | 42552024  | 42552553  | BACE2-IT1   |
| ENSG00000224389 | 2.671945279 | 3.411459265 | protein_coding   | 6  | 31982539  | 32003195  | C4B         |
| ENSG00000224397 | 2.928422289 | 1.667587519 | lincRNA          | 20 | 48884023  | 48896332  |             |
| ENSG00000224401 | 1.16343121  | 1.802319292 | pseudogene       | X  | 47700362  | 47701101  | RPL7P57     |
| ENSG00000224403 | 0           | 0.390640832 | pseudogene       | 3  | 193711120 | 193711774 |             |
| ENSG00000224409 | 0.499066092 | 0           | antisense        | 1  | 33183335  | 33190838  |             |

|                 |             |             |                  |    |           |           |
|-----------------|-------------|-------------|------------------|----|-----------|-----------|
| ENSG00000224411 | 4.464551814 | 4.202780776 | pseudogene       | 11 | 27910385  | 27912580  |
| ENSG00000224413 | 0.869158192 | 2.579085888 | lincRNA          | 21 | 47456966  | 47459721  |
| ENSG00000224414 | 0.499066092 | 0           | pseudogene       | 2  | 218558618 | 218561486 |
| ENSG00000224415 | 1.799000381 | 2.039052734 | pseudogene       | 7  | 102781796 | 102782386 |
| ENSG00000224416 | 0           | 0.390640832 | pseudogene       | 9  | 21278054  | 21278618  |
| ENSG00000224418 | 0.869158192 | 0.697730409 | antisense        | 13 | 99229498  | 99231084  |
| ENSG00000224419 | 0           | 0.390640832 | pseudogene       | 13 | 90882638  | 90883936  |
| ENSG00000224420 | 5.485736881 | 5.072639111 | protein_coding   | 19 | 50193095  | 50193750  |
| ENSG00000224424 | 3.502389126 | 4.127774132 | antisense        | 3  | 48885005  | 48889414  |
| ENSG00000224427 | 1.960915222 | 1.925536307 | pseudogene       | 21 | 34213806  | 34214121  |
| ENSG00000224428 | 5.695874189 | 6.515603638 | processed_transc | 10 | 81586459  | 81601328  |
| ENSG00000224429 | 2.10647801  | 2.242360793 | lincRNA          | 13 | 21877651  | 21922860  |
| ENSG00000224430 | 1.16343121  | 0.950786998 | pseudogene       | X  | 73380895  | 73382363  |
| ENSG00000224431 | 2.35979773  | 3.232099092 | pseudogene       | 5  | 131535149 | 131539180 |
| ENSG00000224437 | 0           | 0.390640832 | pseudogene       | 9  | 73531862  | 73532426  |
| ENSG00000224438 | 0.499066092 | 0           | pseudogene       | 12 | 2891070   | 2891537   |
| ENSG00000224439 | 0.869158192 | 0           | pseudogene       | 10 | 28725130  | 28726007  |
| ENSG00000224447 | 0.499066092 | 0           | pseudogene       | 6  | 26016607  | 26016829  |
| ENSG00000224448 | 0.499066092 | 0.390640832 | pseudogene       | 7  | 99235865  | 99236390  |
| ENSG00000224450 | 0.499066092 | 0           | pseudogene       | 3  | 197907620 | 197917237 |
| ENSG00000224451 | 0.499066092 | 0.697730409 | pseudogene       | 13 | 52172542  | 52173930  |
| ENSG00000224452 | 1.799000381 | 1.802319292 | pseudogene       | 20 | 30758193  | 30758593  |
| ENSG00000224458 | 1.616589159 | 0.390640832 | pseudogene       | 7  | 63560683  | 63580922  |
| ENSG00000224460 | 1.407729925 | 0           | lincRNA          | 6  | 143267184 | 143277835 |
| ENSG00000224462 | 0           | 0.697730409 | pseudogene       | 1  | 207338841 | 207357255 |
| ENSG00000224463 | 0           | 1.353254395 | pseudogene       | 2  | 203096419 | 203096572 |
| ENSG00000224464 | 1.16343121  | 0           | pseudogene       | 2  | 24095138  | 24095884  |
| ENSG00000224467 | 0           | 0.390640832 | antisense        | 2  | 161952742 | 162016735 |
| ENSG00000224468 | 2.238690726 | 2.788380093 | processed_transc | 1  | 183107514 | 183110439 |
| ENSG00000224470 | 9.407740769 | 9.336696989 | protein_coding   | 16 | 71879894  | 71891231  |
| ENSG00000224471 | 0           | 0.390640832 | pseudogene       | X  | 102054491 | 102054814 |
| ENSG00000224473 | 0.499066092 | 0           | pseudogene       | 10 | 30692126  | 30692705  |
| ENSG00000224474 | 0.869158192 | 0.390640832 | protein_coding   | 10 | 99179228  | 99185831  |
| ENSG00000224476 | 0           | 0.390640832 | pseudogene       | 19 | 41675766  | 41676071  |
| ENSG00000224479 | 1.407729925 | 0.390640832 | pseudogene       | 3  | 63727969  | 63813121  |
| ENSG00000224481 | 0.499066092 | 0.697730409 | lincRNA          | 1  | 147801124 | 147816764 |
| ENSG00000224489 | 3.004694206 | 2.334191469 | processed_transc | 10 | 121430230 | 121484200 |
| ENSG00000224490 | 1.16343121  | 1.518964905 | processed_transc | 2  | 166790367 | 166806401 |
| ENSG00000224502 | 1.16343121  | 1.16600992  | sense_intronic   | 10 | 6221120   | 6222152   |
| ENSG00000224503 | 0           | 0.390640832 | pseudogene       | 3  | 65573177  | 65573725  |
| ENSG00000224511 | 0           | 0.390640832 | lincRNA          | 13 | 30677315  | 30683012  |
| ENSG00000224514 | 0.499066092 | 0.697730409 | antisense        | 3  | 13692196  | 13788132  |
| ENSG00000224520 | 2.35979773  | 1.518964905 | pseudogene       | 1  | 157043049 | 157044494 |
| ENSG00000224531 | 8.546104025 | 9.001562612 | protein_coding   | 6  | 11094039  | 11138964  |
| ENSG00000224535 | 0.499066092 | 0           | lincRNA          | 1  | 212640158 | 212641085 |
| ENSG00000224536 | 0.499066092 | 0.390640832 | processed_transc | 1  | 201476369 | 201502736 |
| ENSG00000224541 | 0           | 0.950786998 | antisense        | 21 | 27530409  | 27548142  |
| ENSG00000224543 | 3.698846687 | 4.274079748 | protein_coding   | 19 | 14599758  | 14600691  |
| ENSG00000224545 | 0.499066092 | 0           | pseudogene       | 7  | 131204896 | 131205262 |
| ENSG00000224546 | 0.869158192 | 0.697730409 | pseudogene       | 9  | 98908307  | 98910141  |
| ENSG00000224549 | 0           | 0.697730409 | lincRNA          | 9  | 22767174  | 22768315  |
| ENSG00000224550 | 0           | 0.950786998 | pseudogene       | 1  | 108047825 | 108048070 |
| ENSG00000224551 | 0           | 0.390640832 | pseudogene       | 7  | 96764327  | 96764873  |
| ENSG00000224555 | 1.407729925 | 0           | pseudogene       | 11 | 4010387   | 4010693   |
| ENSG00000224557 | 0           | 0.390640832 | pseudogene       | 6  | 33080228  | 33102442  |
| ENSG00000224563 | 0.499066092 | 0.390640832 | antisense        | 3  | 188280026 | 188286454 |
| ENSG00000224565 | 0           | 0.390640832 | lincRNA          | 20 | 46020673  | 46041071  |
| ENSG00000224566 | 0.869158192 | 0.390640832 | pseudogene       | 1  | 228302703 | 228303174 |
| ENSG00000224574 | 0           | 0.390640832 | antisense        | 21 | 46827301  | 46829980  |
| ENSG00000224578 | 5.107569429 | 5.072639111 | pseudogene       | 16 | 51679667  | 51681043  |
| ENSG00000224579 | 1.16343121  | 0.950786998 | pseudogene       | 19 | 54712960  | 54713286  |
| ENSG00000224584 | 0           | 0.390640832 | pseudogene       | 1  | 214786304 | 214786741 |
| ENSG00000224594 | 0           | 0.390640832 | pseudogene       | 8  | 49297150  | 49297609  |

|                 |             |             |                  |    |           |                     |
|-----------------|-------------|-------------|------------------|----|-----------|---------------------|
| ENSG00000224596 | 5.512107582 | 6.403479675 | processed_transc | 10 | 80703085  | 80828817            |
| ENSG00000224597 | 8.209916558 | 9.255345226 | antisense        | 10 | 29698331  | 29776674            |
| ENSG00000224598 | 1.16343121  | 1.16600992  | pseudogene       | 21 | 35507732  | 35508371 RPS5P2     |
| ENSG00000224599 | 0.499066092 | 0           | pseudogene       | 9  | 70083601  | 70087216            |
| ENSG00000224606 | 0.499066092 | 0           | sense_intronic   | 2  | 70694517  | 70695627 TGFA-IT1   |
| ENSG00000224609 | 0.499066092 | 0           | processed_transc | 1  | 59597608  | 59664293            |
| ENSG00000224613 | 0           | 0.390640832 | antisense        | 1  | 103960701 | 104068115           |
| ENSG00000224614 | 2.10647801  | 2.334191469 | processed_transc | 3  | 195634947 | 195638128           |
| ENSG00000224616 | 0.869158192 | 1.667587519 | antisense        | 1  | 100729565 | 100731676           |
| ENSG00000224621 | 2.35979773  | 2.242360793 | antisense        | 1  | 16485761  | 16488378            |
| ENSG00000224628 | 0           | 0.390640832 | pseudogene       | 20 | 29873120  | 29874638            |
| ENSG00000224629 | 1.407729925 | 1.667587519 | pseudogene       | 7  | 157055716 | 157055923           |
| ENSG00000224631 | 4.352265886 | 4.961837817 | pseudogene       | 16 | 61089349  | 61089818            |
| ENSG00000224635 | 4.962122459 | 5.175534283 | lincRNA          | 20 | 37034658  | 37045444            |
| ENSG00000224638 | 0.499066092 | 0.390640832 | lincRNA          | 2  | 174745593 | 174764156           |
| ENSG00000224644 | 0.869158192 | 0.697730409 | antisense        | 9  | 114336472 | 114337707           |
| ENSG00000224647 | 2.10647801  | 1.16600992  | pseudogene       | 17 | 7233771   | 7238732             |
| ENSG00000224649 | 0.499066092 | 0.697730409 | antisense        | 21 | 30554348  | 30560116            |
| ENSG00000224652 | 1.960915222 | 0.390640832 | processed_transc | 3  | 195869507 | 195887761           |
| ENSG00000224655 | 0.499066092 | 1.16600992  | lincRNA          | 2  | 122548020 | 122554278           |
| ENSG00000224660 | 5.107569429 | 5.372493443 | processed_transc | 3  | 15295691  | 15306000            |
| ENSG00000224666 | 0           | 0.950786998 | antisense        | 6  | 36354608  | 36359771            |
| ENSG00000224668 | 1.16343121  | 1.925536307 | pseudogene       | 1  | 211032519 | 211035627 IPO8P1    |
| ENSG00000224669 | 0.499066092 | 0.390640832 | pseudogene       | 7  | 64043111  | 64043585            |
| ENSG00000224671 | 0.869158192 | 0           | antisense        | 1  | 203113092 | 203122028           |
| ENSG00000224672 | 0.869158192 | 0           | pseudogene       | 2  | 201966105 | 201967859           |
| ENSG00000224677 | 0.499066092 | 0.390640832 | pseudogene       | 15 | 43941321  | 43941478            |
| ENSG00000224678 | 0.869158192 | 0           | pseudogene       | 1  | 92580359  | 92581362 GAPDHP46   |
| ENSG00000224680 | 1.16343121  | 1.518964905 | pseudogene       | 1  | 52834347  | 52834911 PLA2G12AP1 |
| ENSG00000224682 | 1.799000381 | 1.925536307 | pseudogene       | 9  | 138339292 | 138342000           |
| ENSG00000224683 | 0           | 0.697730409 | pseudogene       | 7  | 16248570  | 16248890            |
| ENSG00000224684 | 0.499066092 | 0           | antisense        | 9  | 118969286 | 118970488           |
| ENSG00000224687 | 2.238690726 | 3.32456471  | processed_transc | 1  | 178060643 | 178063119           |
| ENSG00000224699 | 1.16343121  | 1.518964905 | antisense        | 1  | 110950147 | 110961033           |
| ENSG00000224707 | 0           | 0.390640832 | sense_intronic   | 6  | 20438052  | 20440409 E2F3-IT1   |
| ENSG00000224712 | 0           | 0.390640832 | protein_coding   | 16 | 14802801  | 15045901            |
| ENSG00000224713 | 2.35979773  | 3.368666104 | antisense        | 12 | 58005901  | 58011848            |
| ENSG00000224715 | 2.762599152 | 3.279072565 | lincRNA          | 22 | 47741319  | 47769291            |
| ENSG00000224722 | 0.869158192 | 0.390640832 | pseudogene       | 8  | 128098508 | 128099755           |
| ENSG00000224727 | 1.407729925 | 1.353254395 | pseudogene       | 1  | 243430559 | 243431421           |
| ENSG00000224728 | 1.616589159 | 2.420525079 | pseudogene       | 3  | 15919554  | 15921078            |
| ENSG00000224729 | 1.960915222 | 0           | antisense        | 7  | 100187025 | 100201829           |
| ENSG00000224733 | 0           | 0.390640832 | antisense        | 6  | 128821672 | 128822321           |
| ENSG00000224738 | 4.062237333 | 3.813624741 | antisense        | 17 | 57183959  | 57195628            |
| ENSG00000224745 | 1.407729925 | 2.579085888 | sense_intronic   | 10 | 89638449  | 89640184            |
| ENSG00000224746 | 0           | 1.16600992  | processed_transc | 7  | 135611203 | 135617629           |
| ENSG00000224747 | 2.238690726 | 1.518964905 | pseudogene       | 21 | 45889812  | 45892399            |
| ENSG00000224750 | 0.499066092 | 0           | lincRNA          | 10 | 92213927  | 92290873            |
| ENSG00000224751 | 0.499066092 | 1.518964905 | pseudogene       | 1  | 44315974  | 44317405 SHMT1P1    |
| ENSG00000224763 | 1.616589159 | 0.950786998 | pseudogene       | 1  | 211833531 | 211834619 FDPSP8    |
| ENSG00000224769 | 0.499066092 | 0           | pseudogene       | 3  | 195341818 | 195347104           |
| ENSG00000224773 | 0           | 1.16600992  | pseudogene       | X  | 114009490 | 114011334           |
| ENSG00000224776 | 0           | 0.390640832 | pseudogene       | 11 | 109852918 | 109853769           |
| ENSG00000224781 | 0           | 0.390640832 | pseudogene       | X  | 52861754  | 52862949            |
| ENSG00000224785 | 2.35979773  | 0           | pseudogene       | 7  | 23602078  | 23603880            |
| ENSG00000224786 | 0.869158192 | 1.353254395 | pseudogene       | 4  | 123651703 | 123653348 CETN4P    |
| ENSG00000224789 | 0.499066092 | 0.390640832 | antisense        | 2  | 120932461 | 120974120           |
| ENSG00000224790 | 1.407729925 | 1.925536307 | lincRNA          | 21 | 38338812  | 38344128            |
| ENSG00000224791 | 0.869158192 | 0.950786998 | pseudogene       | 2  | 204629018 | 204630316           |
| ENSG00000224792 | 0.499066092 | 0           | pseudogene       | 3  | 51851619  | 51853651            |
| ENSG00000224794 | 0.499066092 | 1.353254395 | antisense        | 22 | 39688993  | 39691568            |
| ENSG00000224798 | 0.499066092 | 0.390640832 | sense_intronic   | 13 | 50351804  | 50354767 KPNA3-IT1  |
| ENSG00000224799 | 1.407729925 | 1.802319292 | antisense        | X  | 56999943  | 57001229            |

|                 |             |             |                  |    |           |                       |
|-----------------|-------------|-------------|------------------|----|-----------|-----------------------|
| ENSG00000224800 | 0           | 0.697730409 | pseudogene       | 1  | 150853712 | 150854159             |
| ENSG00000224802 | 0           | 0.950786998 | pseudogene       | 9  | 34109199  | 34109966              |
| ENSG00000224803 | 0           | 0.390640832 | pseudogene       | 9  | 66836847  | 66837138              |
| ENSG00000224804 | 0           | 0.697730409 | antisense        | 7  | 74855312  | 74864233              |
| ENSG00000224805 | 0.869158192 | 1.518964905 | antisense        | 1  | 47644922  | 47646011              |
| ENSG00000224809 | 0.869158192 | 0           | pseudogene       | 9  | 94933974  | 94935776              |
| ENSG00000224812 | 0           | 0.697730409 | processed_transc | 10 | 45306472  | 45455137 TMEM72-AS1   |
| ENSG00000224813 | 0           | 1.353254395 | pseudogene       | 1  | 329784    | 453948                |
| ENSG00000224818 | 3.077135474 | 0.390640832 | lincRNA          | 1  | 201433511 | 201434274             |
| ENSG00000224820 | 0           | 0.390640832 | pseudogene       | 9  | 74722735  | 74723228 BTF3P4       |
| ENSG00000224822 | 0           | 0.697730409 | sense_intronic   | 3  | 24496627  | 24500925 THRB-IT1     |
| ENSG00000224827 | 2.10647801  | 2.242360793 | pseudogene       | Y  | 26422392  | 26423173 LINC00265-2P |
| ENSG00000224831 | 2.471521042 | 1.16600992  | pseudogene       | 3  | 149699965 | 149701095             |
| ENSG00000224834 | 0.499066092 | 0           | pseudogene       | 1  | 227621765 | 227622047 BTF3P9      |
| ENSG00000224837 | 0.499066092 | 1.16600992  | pseudogene       | 1  | 168025139 | 168025660             |
| ENSG00000224839 | 0           | 0.697730409 | pseudogene       | 2  | 208921972 | 208922469             |
| ENSG00000224843 | 2.762599152 | 4.406904905 | processed_transc | 6  | 26988232  | 26991703 LINC00240    |
| ENSG00000224844 | 0           | 0.390640832 | lincRNA          | 2  | 238031553 | 238032740             |
| ENSG00000224846 | 0           | 0.390640832 | antisense        | 6  | 2989960   | 2999368               |
| ENSG00000224848 | 4.981125677 | 4.710890357 | lincRNA          | 9  | 99449338  | 99483403              |
| ENSG00000224855 | 0           | 0.697730409 | antisense        | 3  | 193336398 | 193345126 OPA1-AS1    |
| ENSG00000224856 | 0.499066092 | 0.697730409 | pseudogene       | 22 | 44352907  | 44353222              |
| ENSG00000224857 | 0.499066092 | 0.697730409 | lincRNA          | 1  | 121315744 | 121322322             |
| ENSG00000224858 | 0           | 0.950786998 | pseudogene       | 3  | 37058014  | 37058505              |
| ENSG00000224861 | 1.960915222 | 1.925536307 | pseudogene       | 14 | 66479548  | 66480507 YBX1P1       |
| ENSG00000224863 | 1.799000381 | 1.518964905 | processed_transc | 1  | 46912345  | 46915376              |
| ENSG00000224864 | 0           | 0.697730409 | pseudogene       | 19 | 20235248  | 20236293              |
| ENSG00000224870 | 6.068837212 | 6.3217081   | processed_transc | 1  | 1334902   | 1337426               |
| ENSG00000224877 | 7.326727684 | 7.764467022 | protein_coding   | 17 | 79213111  | 79215098 C17orf89     |
| ENSG00000224881 | 2.57521082  | 3.133298822 | pseudogene       | 2  | 87607003  | 87607890              |
| ENSG00000224885 | 0.869158192 | 1.353254395 | sense_intronic   | 2  | 3302112   | 3305236 TSSC1-IT1     |
| ENSG00000224886 | 3.146112541 | 3.411459265 | pseudogene       | 10 | 81444248  | 81444739              |
| ENSG00000224888 | 5.054730169 | 5.361622823 | antisense        | 16 | 88797588  | 88807826              |
| ENSG00000224890 | 0           | 0.390640832 | pseudogene       | 9  | 123838730 | 123839154             |
| ENSG00000224891 | 0.499066092 | 1.667587519 | pseudogene       | 2  | 37375673  | 37376447              |
| ENSG00000224892 | 1.799000381 | 0.697730409 | pseudogene       | 13 | 52034661  | 52035532 RPS4XP16     |
| ENSG00000224897 | 3.448790144 | 3.714580548 | processed_transc | 7  | 124569927 | 124819369             |
| ENSG00000224899 | 0.499066092 | 0           | lincRNA          | 7  | 124791380 | 124793665             |
| ENSG00000224900 | 1.799000381 | 1.802319292 | sense_intronic   | 1  | 206576565 | 206577294             |
| ENSG00000224903 | 2.471521042 | 1.16600992  | antisense        | 7  | 156446879 | 156450387             |
| ENSG00000224905 | 2.35979773  | 3.279072565 | processed_transc | 21 | 15399742  | 15516789              |
| ENSG00000224906 | 0           | 0.390640832 | pseudogene       | 12 | 6547664   | 6548018               |
| ENSG00000224908 | 0.499066092 | 0           | pseudogene       | X  | 133300712 | 133300962 TIMM8BP2    |
| ENSG00000224914 | 3.211941663 | 4.202780776 | lincRNA          | 10 | 89102681  | 89115187              |
| ENSG00000224916 | 0           | 0.390640832 | protein_coding   | 19 | 45445495  | 45452820 APOC4        |
| ENSG00000224927 | 0           | 0.390640832 | pseudogene       | 1  | 110353266 | 110353620             |
| ENSG00000224928 | 0.869158192 | 0.950786998 | pseudogene       | 2  | 219818123 | 219818772 KRT8P30     |
| ENSG00000224930 | 1.407729925 | 0           | lincRNA          | 21 | 46419122  | 46424642 LINC00162    |
| ENSG00000224932 | 0.869158192 | 1.16600992  | lincRNA          | 4  | 118235753 | 118281795             |
| ENSG00000224934 | 2.10647801  | 1.802319292 | antisense        | 10 | 101190948 | 101195542             |
| ENSG00000224939 | 1.16343121  | 1.518964905 | lincRNA          | 1  | 234765057 | 234770526 LINC00184   |
| ENSG00000224940 | 1.16343121  | 0.390640832 | protein_coding   | 7  | 127990379 | 128001739 PRRT4       |
| ENSG00000224945 | 3.871730003 | 2.144285137 | sense_intronic   | 9  | 91703519  | 91724849              |
| ENSG00000224949 | 0           | 0.390640832 | pseudogene       | X  | 54173805  | 54174062              |
| ENSG00000224950 | 3.335220907 | 3.781359661 | processed_transc | 1  | 117035645 | 117041834             |
| ENSG00000224956 | 6.75547892  | 6.252780742 | pseudogene       | 1  | 661611    | 663527                |
| ENSG00000224959 | 4.437288965 | 4.528525526 | processed_transc | 2  | 112249520 | 112252388             |
| ENSG00000224961 | 1.16343121  | 0.697730409 | lincRNA          | 20 | 10733738  | 10734614              |
| ENSG00000224962 | 1.16343121  | 0.950786998 | pseudogene       | 3  | 166408975 | 166409503             |
| ENSG00000224965 | 0           | 0.390640832 | antisense        | 1  | 110751456 | 110752609 KCNC4-AS1   |
| ENSG00000224967 | 1.16343121  | 0           | pseudogene       | 2  | 118691601 | 118692365             |
| ENSG00000224969 | 2.471521042 | 1.667587519 | antisense        | 1  | 947377    | 948573                |
| ENSG00000224972 | 0           | 0.697730409 | processed_transc | 9  | 6902670   | 6978859               |

|                 |             |             |                  |    |           |                       |
|-----------------|-------------|-------------|------------------|----|-----------|-----------------------|
| ENSG00000224973 | 0           | 0.390640832 | processed_transc | 22 | 34121000  | 34146830              |
| ENSG00000224975 | 4.75690578  | 4.841813558 | protein_coding   | X  | 47064320  | 47065264 INE1         |
| ENSG00000224976 | 0.499066092 | 0.697730409 | pseudogene       | 13 | 19923276  | 19982102 PARP4P2      |
| ENSG00000224977 | 0           | 0.390640832 | lincRNA          | 1  | 173991647 | 173992123             |
| ENSG00000224981 | 0.499066092 | 0           | pseudogene       | 7  | 126508821 | 126510586             |
| ENSG00000224986 | 0.499066092 | 0.697730409 | pseudogene       | 1  | 48790762  | 48791795 PPP1R8P1     |
| ENSG00000224988 | 0.499066092 | 0           | pseudogene       | 9  | 132645972 | 132646449             |
| ENSG00000224992 | 2.238690726 | 1.925536307 | sense_intronic   | 9  | 135644840 | 135645599             |
| ENSG00000224993 | 0.869158192 | 0.950786998 | pseudogene       | 5  | 43666867  | 43667334              |
| ENSG00000224997 | 4.437288965 | 3.532712221 | protein_coding   | 14 | 104177607 | 104179149             |
| ENSG00000224999 | 0           | 0.390640832 | pseudogene       | 6  | 169696566 | 169698054             |
| ENSG00000225014 | 0.499066092 | 0           | pseudogene       | 17 | 20015137  | 20016303 KCTD9P1      |
| ENSG00000225015 | 0.499066092 | 0.697730409 | pseudogene       | 1  | 142660017 | 142660749 SNX18P15    |
| ENSG00000225016 | 0.869158192 | 0           | pseudogene       | 13 | 19383970  | 19384188 LINC00328-2P |
| ENSG00000225017 | 0           | 0.390640832 | pseudogene       | 8  | 100358280 | 100360484             |
| ENSG00000225022 | 1.407729925 | 0.697730409 | pseudogene       | 20 | 5273034   | 5273477 UBE2D3P1      |
| ENSG00000225026 | 0.499066092 | 0           | pseudogene       | 3  | 12369502  | 12369773              |
| ENSG00000225028 | 0           | 0.390640832 | lincRNA          | 1  | 48283738  | 48285909              |
| ENSG00000225030 | 1.16343121  | 0.390640832 | sense_intronic   | 1  | 53757463  | 53757810              |
| ENSG00000225031 | 4.352265886 | 4.250702764 | pseudogene       | X  | 110862905 | 110864717 EIF4BP7     |
| ENSG00000225032 | 5.375152132 | 5.137803333 | antisense        | 9  | 130578345 | 130584799             |
| ENSG00000225037 | 1.16343121  | 1.16600992  | antisense        | X  | 20158086  | 20158562 EIF1AX-AS1   |
| ENSG00000225039 | 0.499066092 | 0.390640832 | lincRNA          | 13 | 30993656  | 30996374              |
| ENSG00000225043 | 1.16343121  | 1.16600992  | pseudogene       | 21 | 47840467  | 47840948 RPL18AP2     |
| ENSG00000225051 | 1.616589159 | 1.518964905 | pseudogene       | 5  | 179106033 | 179121782 HMGB3P22    |
| ENSG00000225057 | 0.499066092 | 0           | processed_transc | 2  | 239140325 | 239164274             |
| ENSG00000225059 | 1.16343121  | 0.697730409 | pseudogene       | 6  | 31351824  | 31352193              |
| ENSG00000225062 | 0           | 0.950786998 | processed_transc | 2  | 219231388 | 219232558             |
| ENSG00000225065 | 0           | 0.697730409 | antisense        | 20 | 33284722  | 33302432              |
| ENSG00000225067 | 0.869158192 | 1.16600992  | pseudogene       | 19 | 15722467  | 15722934              |
| ENSG00000225071 | 0           | 0.390640832 | pseudogene       | X  | 24447690  | 24448037              |
| ENSG00000225075 | 0.869158192 | 2.501982735 | antisense        | 1  | 113236310 | 113239243             |
| ENSG00000225076 | 0.499066092 | 0.390640832 | antisense        | X  | 9992882   | 10006694 WWC3-AS1     |
| ENSG00000225077 | 3.448790144 | 3.532712221 | antisense        | 1  | 6296300   | 6299504 LINC00337     |
| ENSG00000225082 | 0.869158192 | 0.697730409 | pseudogene       | 1  | 155556435 | 155571988 DAP3P1      |
| ENSG00000225083 | 0.499066092 | 0           | antisense        | 13 | 114005988 | 114016183 GRTP1-AS1   |
| ENSG00000225084 | 0.869158192 | 0           | antisense        | 17 | 2135974   | 2136904               |
| ENSG00000225087 | 0.499066092 | 0           | lincRNA          | 1  | 73214604  | 73364823              |
| ENSG00000225092 | 1.16343121  | 0.697730409 | processed_transc | 6  | 7183316   | 7185520               |
| ENSG00000225093 | 3.004694206 | 2.971122874 | pseudogene       | 6  | 108325561 | 108326772             |
| ENSG00000225094 | 1.16343121  | 1.16600992  | pseudogene       | 4  | 110474478 | 110475250 SETP20      |
| ENSG00000225099 | 0.499066092 | 0           | pseudogene       | 1  | 43368903  | 43369583 ATP6V1E1P1   |
| ENSG00000225100 | 0.499066092 | 0           | pseudogene       | 10 | 81742671  | 81742996              |
| ENSG00000225111 | 0.499066092 | 0           | sense_intronic   | 2  | 208733306 | 208734639             |
| ENSG00000225113 | 1.799000381 | 1.518964905 | antisense        | 1  | 110138847 | 110140403             |
| ENSG00000225118 | 0.499066092 | 0           | pseudogene       | 10 | 94637849  | 94638046              |
| ENSG00000225119 | 5.752272083 | 5.564846512 | processed_transc | 10 | 38692117  | 38737700              |
| ENSG00000225124 | 0.499066092 | 0           | pseudogene       | 2  | 203939408 | 203939865             |
| ENSG00000225125 | 2.238690726 | 3.081239798 | pseudogene       | X  | 135889424 | 135890036 RANP4       |
| ENSG00000225131 | 1.616589159 | 1.16600992  | pseudogene       | 13 | 49345264  | 49345965 PSME2P2      |
| ENSG00000225135 | 4.712111592 | 4.872768657 | lincRNA          | 6  | 147708800 | 147711601             |
| ENSG00000225137 | 0.869158192 | 1.16600992  | pseudogene       | 10 | 52024738  | 52026575              |
| ENSG00000225138 | 7.102117104 | 8.501254594 | antisense        | 5  | 478238    | 480999                |
| ENSG00000225140 | 0.869158192 | 1.353254395 | antisense        | 10 | 674578    | 677195                |
| ENSG00000225146 | 1.16343121  | 1.16600992  | antisense        | 7  | 1068661   | 1083527               |
| ENSG00000225151 | 7.715131365 | 7.862183683 | pseudogene       | 15 | 84867600  | 84898890              |
| ENSG00000225156 | 0.499066092 | 0           | antisense        | 2  | 45181803  | 45195901              |
| ENSG00000225157 | 0           | 0.697730409 | pseudogene       | 19 | 45687584  | 45688190              |
| ENSG00000225159 | 2.10647801  | 1.925536307 | pseudogene       | 1  | 27533421  | 27534287              |
| ENSG00000225160 | 1.960915222 | 1.16600992  | lincRNA          | 20 | 25982172  | 25982935              |
| ENSG00000225163 | 1.407729925 | 1.353254395 | lincRNA          | 14 | 97409916  | 97411731 C14orf63     |
| ENSG00000225165 | 0.869158192 | 0.390640832 | pseudogene       | 5  | 94775748  | 94776391              |
| ENSG00000225169 | 0.499066092 | 0.390640832 | pseudogene       | 1  | 100678849 | 100679226 BRI3P1      |



|                 |             |             |                  |    |           |                      |
|-----------------|-------------|-------------|------------------|----|-----------|----------------------|
| ENSG00000225170 | 1.16343121  | 0           | pseudogene       | 20 | 22252690  | 22254092             |
| ENSG00000225171 | 2.35979773  | 1.518964905 | pseudogene       | 1  | 166837985 | 166838447 DUTP6      |
| ENSG00000225173 | 1.960915222 | 2.039052734 | lincRNA          | 6  | 28805646  | 28806783             |
| ENSG00000225177 | 3.335220907 | 3.453019579 | antisense        | 6  | 139013685 | 139018425            |
| ENSG00000225178 | 0           | 0.697730409 | pseudogene       | 16 | 73974538  | 73975423 RPSAP56     |
| ENSG00000225180 | 1.16343121  | 0           | antisense        | 17 | 79139307  | 79156964 AATK-AS1    |
| ENSG00000225185 | 0.499066092 | 0.390640832 | pseudogene       | 12 | 98984501  | 98984992             |
| ENSG00000225187 | 0.869158192 | 0.390640832 | antisense        | 2  | 47294961  | 47298343             |
| ENSG00000225190 | 8.646233023 | 8.755966294 | protein_coding   | 17 | 43513267  | 43568146 PLEKHM1     |
| ENSG00000225192 | 0.499066092 | 1.667587519 | pseudogene       | 10 | 38083204  | 38085037             |
| ENSG00000225193 | 2.471521042 | 1.925536307 | pseudogene       | 15 | 90749804  | 90750195 RPS12P26    |
| ENSG00000225200 | 2.928422289 | 2.579085888 | pseudogene       | 14 | 106444607 | 106445233            |
| ENSG00000225205 | 3.698846687 | 3.64455972  | antisense        | 2  | 173345568 | 173421324            |
| ENSG00000225206 | 0.499066092 | 1.353254395 | pseudogene       | 1  | 98508913  | 98511014 MIR2682     |
| ENSG00000225210 | 7.127924785 | 8.721307575 | lincRNA          | 14 | 19650018  | 19718563             |
| ENSG00000225213 | 0           | 0.390640832 | antisense        | 10 | 16763436  | 16765207             |
| ENSG00000225215 | 0           | 0.697730409 | pseudogene       | 11 | 107274130 | 107275315 SMARCE1P1  |
| ENSG00000225218 | 2.847891871 | 2.721932731 | lincRNA          | 21 | 44251150  | 44256587             |
| ENSG00000225222 | 0           | 0.697730409 | pseudogene       | 1  | 246342080 | 246342507            |
| ENSG00000225224 | 1.616589159 | 1.353254395 | pseudogene       | 7  | 156985062 | 156985526            |
| ENSG00000225225 | 2.10647801  | 1.667587519 | pseudogene       | 22 | 18585223  | 18586415 ARL2BPP10   |
| ENSG00000225230 | 0.869158192 | 1.16600992  | antisense        | 5  | 56195868  | 56206541             |
| ENSG00000225234 | 1.960915222 | 2.579085888 | antisense        | 2  | 3485013   | 3486180 TRAPPC12-AS1 |
| ENSG00000225235 | 0.499066092 | 0           | antisense        | X  | 134654008 | 134654599 DDX26B-AS1 |
| ENSG00000225241 | 8.088119026 | 8.486319932 | lincRNA          | 1  | 144593363 | 144621656 NBPF8      |
| ENSG00000225251 | 0           | 0.390640832 | pseudogene       | 10 | 13099902  | 13100676             |
| ENSG00000225254 | 0           | 0.390640832 | pseudogene       | 9  | 38452786  | 38454067             |
| ENSG00000225259 | 0.869158192 | 0.697730409 | pseudogene       | 8  | 134420249 | 134421471 ST13P6     |
| ENSG00000225261 | 2.57521082  | 0.950786998 | antisense        | X  | 148629755 | 148631380            |
| ENSG00000225264 | 3.989024711 | 3.232099092 | processed_transc | 7  | 29638411  | 29724871             |
| ENSG00000225265 | 2.671945279 | 3.232099092 | antisense        | 1  | 222763167 | 222766374            |
| ENSG00000225267 | 0           | 0.390640832 | pseudogene       | 21 | 31635698  | 31636199 RPL8P2      |
| ENSG00000225269 | 2.847891871 | 0.950786998 | lincRNA          | 10 | 4697619   | 4704611              |
| ENSG00000225272 | 0           | 0.697730409 | pseudogene       | 1  | 165645547 | 165646015            |
| ENSG00000225278 | 1.960915222 | 2.144285137 | processed_transc | 1  | 143211528 | 143275032            |
| ENSG00000225285 | 3.871730003 | 4.622587519 | lincRNA          | 1  | 1365919   | 1369953              |
| ENSG00000225286 | 0           | 1.353254395 | pseudogene       | 7  | 28654714  | 28655505             |
| ENSG00000225297 | 0.499066092 | 0.390640832 | pseudogene       | 1  | 93665312  | 93665496             |
| ENSG00000225300 | 1.960915222 | 2.144285137 | sense_intronic   | 1  | 246769175 | 246771404            |
| ENSG00000225302 | 2.847891871 | 3.368666104 | antisense        | 10 | 118592512 | 118609716            |
| ENSG00000225306 | 1.407729925 | 0.697730409 | antisense        | 1  | 36057977  | 36059256             |
| ENSG00000225308 | 1.16343121  | 1.353254395 | pseudogene       | 7  | 21259832  | 21261047 ASS1P11     |
| ENSG00000225311 | 0           | 0.390640832 | antisense        | 6  | 144632835 | 144654437            |
| ENSG00000225313 | 1.16343121  | 2.144285137 | antisense        | 1  | 33780296  | 33791644             |
| ENSG00000225331 | 2.762599152 | 2.971122874 | lincRNA          | 21 | 45578623  | 45579959             |
| ENSG00000225333 | 0           | 0.390640832 | pseudogene       | 1  | 40183700  | 40184268             |
| ENSG00000225335 | 1.16343121  | 2.144285137 | antisense        | 22 | 18559293  | 18560563             |
| ENSG00000225336 | 0           | 0.390640832 | pseudogene       | 20 | 33421378  | 33422265 HMGB3P1     |
| ENSG00000225338 | 1.616589159 | 1.353254395 | pseudogene       | 1  | 212482393 | 212482860            |
| ENSG00000225339 | 10.0120557  | 9.327648427 | processed_transc | 6  | 34247482  | 34252266             |
| ENSG00000225345 | 3.554067925 | 4.585695337 | pseudogene       | 9  | 38566257  | 38568208 SNX18P3     |
| ENSG00000225347 | 0.869158192 | 0.390640832 | pseudogene       | 9  | 32333455  | 32334352             |
| ENSG00000225353 | 0.499066092 | 0.697730409 | lincRNA          | 9  | 46270786  | 46274928             |
| ENSG00000225356 | 0.499066092 | 0           | pseudogene       | 4  | 182443813 | 182444154            |
| ENSG00000225357 | 0.499066092 | 0.390640832 | pseudogene       | 20 | 34340736  | 34341514             |
| ENSG00000225358 | 0.499066092 | 0           | pseudogene       | 7  | 112375221 | 112378748 MIPEPP1    |
| ENSG00000225361 | 3.211941663 | 3.232099092 | antisense        | 9  | 138359934 | 138364095            |
| ENSG00000225362 | 0.869158192 | 0.697730409 | protein_coding   | 15 | 71402583  | 71407833 CT62        |
| ENSG00000225364 | 0.499066092 | 0.390640832 | pseudogene       | 5  | 132284185 | 132284410 ATP6V0E1P1 |
| ENSG00000225371 | 1.799000381 | 0           | pseudogene       | 7  | 56430151  | 56432963 CICP8       |
| ENSG00000225373 | 4.883502971 | 5.072639111 | protein_coding   | 19 | 65917     | 70966                |
| ENSG00000225374 | 1.407729925 | 1.802319292 | antisense        | X  | 13785519  | 13785984             |
| ENSG00000225377 | 4.800350936 | 5.187895122 | antisense        | 20 | 300957    | 328868               |

|                 |             |             |                  |   |    |           |           |             |
|-----------------|-------------|-------------|------------------|---|----|-----------|-----------|-------------|
| ENSG00000225383 | 6.17992145  | 5.816437314 | lincRNA          |   | 10 | 10826402  | 10836943  | SFTA1P      |
| ENSG00000225385 | 1.799000381 | 1.353254395 | pseudogene       |   | 9  | 90681448  | 90682936  |             |
| ENSG00000225393 | 0.499066092 | 0           | antisense        | X |    | 154697947 | 154716707 |             |
| ENSG00000225399 | 0.869158192 | 2.039052734 | protein_coding   |   | 3  | 49297518  | 49298749  |             |
| ENSG00000225400 | 1.799000381 | 2.039052734 | pseudogene       | X |    | 135929543 | 135930193 |             |
| ENSG00000225401 | 0.499066092 | 0.390640832 | pseudogene       |   | 1  | 244558278 | 244558962 | TGIF2P1     |
| ENSG00000225402 | 0.499066092 | 0.390640832 | pseudogene       |   | 2  | 38044058  | 38045104  |             |
| ENSG00000225405 | 2.57521082  | 2.420525079 | pseudogene       |   | 4  | 62971378  | 62971767  |             |
| ENSG00000225406 | 0.499066092 | 0.390640832 | pseudogene       |   | 2  | 186411862 | 186412545 |             |
| ENSG00000225407 | 0.499066092 | 0           | lincRNA          |   | 5  | 75987264  | 76012040  |             |
| ENSG00000225411 | 1.407729925 | 1.667587519 | processed_transc |   | 9  | 68397878  | 68401759  |             |
| ENSG00000225416 | 0.499066092 | 1.16600992  | pseudogene       |   | 7  | 152299298 | 152299977 |             |
| ENSG00000225419 | 0           | 1.353254395 | pseudogene       |   | 20 | 18465909  | 18466696  | RPL21P3     |
| ENSG00000225420 | 0.499066092 | 0           | antisense        |   | 2  | 88838238  | 88875128  |             |
| ENSG00000225422 | 0.499066092 | 0           | pseudogene       |   | 12 | 66627862  | 66629014  | RBMS1P1     |
| ENSG00000225423 | 0.869158192 | 0.390640832 | pseudogene       |   | 10 | 86150664  | 86151801  |             |
| ENSG00000225425 | 0.499066092 | 0.950786998 | antisense        |   | 9  | 132677198 | 132677715 |             |
| ENSG00000225433 | 0.499066092 | 0.390640832 | pseudogene       |   | 9  | 42779796  | 42779998  | MTND1P12    |
| ENSG00000225434 | 2.57521082  | 2.788380093 | processed_transc |   | 9  | 74920345  | 74958126  |             |
| ENSG00000225436 | 4.261916566 | 5.085909553 | antisense        |   | 17 | 16229799  | 16250988  |             |
| ENSG00000225439 | 3.146112541 | 3.679994897 | processed_transc |   | 2  | 74375136  | 74377188  | BOLA3-AS1   |
| ENSG00000225442 | 0.869158192 | 0           | antisense        |   | 17 | 16979352  | 16980672  |             |
| ENSG00000225443 | 0.499066092 | 0           | pseudogene       |   | 7  | 44550624  | 44550931  |             |
| ENSG00000225445 | 0.869158192 | 0.390640832 | processed_transc |   | 17 | 42384668  | 42392683  |             |
| ENSG00000225447 | 0.499066092 | 1.353254395 | pseudogene       |   | 1  | 46111488  | 46111869  | RPS15AP10   |
| ENSG00000225450 | 0.869158192 | 1.518964905 | antisense        |   | 22 | 39135008  | 39145046  |             |
| ENSG00000225451 | 0           | 0.390640832 | pseudogene       |   | 7  | 63336719  | 63337728  |             |
| ENSG00000225460 | 0           | 0.697730409 | pseudogene       |   | 9  | 92087152  | 92087607  |             |
| ENSG00000225461 | 1.16343121  | 0.390640832 | antisense        |   | 10 | 112257757 | 112258300 |             |
| ENSG00000225462 | 0           | 0.697730409 | pseudogene       |   | 1  | 187532193 | 187533263 | FDPSP1      |
| ENSG00000225465 | 0.869158192 | 0.390640832 | antisense        |   | 22 | 29833006  | 29838118  | RFPL1-AS1   |
| ENSG00000225470 | 7.1740722   | 7.18590274  | lincRNA          | X |    | 73164177  | 73220326  | JPX         |
| ENSG00000225471 | 3.911897206 | 3.532712221 | pseudogene       | X |    | 71364034  | 71381600  |             |
| ENSG00000225472 | 1.407729925 | 0.697730409 | antisense        |   | 9  | 14317084  | 14357907  |             |
| ENSG00000225473 | 0           | 0.390640832 | antisense        |   | 3  | 193271002 | 193272877 | ATP13A4-AS1 |
| ENSG00000225474 | 1.16343121  | 2.334191469 | antisense        |   | 13 | 35621967  | 35623401  | NBEA-AS1    |
| ENSG00000225475 | 0.499066092 | 0           | pseudogene       |   | 1  | 57085082  | 57085222  |             |
| ENSG00000225483 | 0           | 0.390640832 | pseudogene       |   | 1  | 206180054 | 206180443 |             |
| ENSG00000225484 | 5.458875168 | 5.726093467 | processed_transc |   | 10 | 81563813  | 81586350  |             |
| ENSG00000225485 | 9.625684414 | 8.099860884 | protein_coding   |   | 17 | 36584720  | 36668628  | ARHGAP23    |
| ENSG00000225486 | 0.869158192 | 0.390640832 | pseudogene       |   | 1  | 233971826 | 233972178 |             |
| ENSG00000225492 | 1.960915222 | 1.518964905 | pseudogene       |   | 1  | 89873238  | 89891802  | GBP1P1      |
| ENSG00000225493 | 1.16343121  | 2.501982735 | lincRNA          |   | 2  | 239419331 | 239463695 |             |
| ENSG00000225495 | 0.499066092 | 0.390640832 | processed_transc |   | 1  | 75018088  | 75218059  |             |
| ENSG00000225496 | 0.869158192 | 0           | pseudogene       |   | 2  | 112697879 | 112698613 |             |
| ENSG00000225498 | 0.499066092 | 0.697730409 | lincRNA          |   | 7  | 89941810  | 89951906  |             |
| ENSG00000225505 | 0.499066092 | 0.950786998 | pseudogene       |   | 1  | 93197557  | 93198814  |             |
| ENSG00000225506 | 0.499066092 | 0           | lincRNA          |   | 1  | 47562325  | 47644943  |             |
| ENSG00000225507 | 4.689181911 | 4.127774132 | pseudogene       |   | 7  | 47996390  | 47996915  |             |
| ENSG00000225511 | 1.407729925 | 0           | processed_transc |   | 9  | 94903580  | 94921890  | LINC00475   |
| ENSG00000225513 | 0           | 0.697730409 | pseudogene       |   | 9  | 114935802 | 114936251 |             |
| ENSG00000225515 | 0.869158192 | 0.950786998 | antisense        |   | 6  | 47495926  | 47496397  |             |
| ENSG00000225518 | 2.471521042 | 2.144285137 | processed_transc |   | 1  | 226274582 | 226277993 |             |
| ENSG00000225521 | 0.499066092 | 0           | antisense        |   | 2  | 241955016 | 242003533 |             |
| ENSG00000225526 | 2.762599152 | 2.420525079 | protein_coding   |   | 3  | 12556433  | 12602558  | MKRN2-AS1   |
| ENSG00000225527 | 0.499066092 | 0.697730409 | antisense        |   | 10 | 18820778  | 18822265  |             |
| ENSG00000225531 | 0.869158192 | 0           | pseudogene       |   | 9  | 109879110 | 109879838 |             |
| ENSG00000225532 | 0.499066092 | 0           | lincRNA          |   | 6  | 171045261 | 171046865 |             |
| ENSG00000225533 | 0           | 0.390640832 | pseudogene       |   | 10 | 96943410  | 96943974  |             |
| ENSG00000225535 | 1.407729925 | 0.950786998 | lincRNA          |   | 7  | 114719012 | 114766368 |             |
| ENSG00000225536 | 0.499066092 | 0.697730409 | pseudogene       | X |    | 85339719  | 85341344  |             |
| ENSG00000225541 | 2.928422289 | 2.652276565 | processed_transc |   | 7  | 22611226  | 22701411  |             |
| ENSG00000225544 | 1.616589159 | 1.353254395 | pseudogene       |   | 22 | 22239621  | 22240012  |             |

|                 |             |             |                  |    |           |                       |
|-----------------|-------------|-------------|------------------|----|-----------|-----------------------|
| ENSG00000225549 | 0.499066092 | 0           | pseudogene       | 6  | 119078681 | 119104583             |
| ENSG00000225551 | 0           | 0.390640832 | pseudogene       | 9  | 95301335  | 95301466              |
| ENSG00000225554 | 0           | 0.390640832 | lincRNA          | 1  | 241587592 | 241596792             |
| ENSG00000225555 | 0           | 0.390640832 | antisense        | 21 | 35743101  | 35747647              |
| ENSG00000225556 | 2.35979773  | 2.652276565 | protein_coding   | 1  | 151810295 | 151813033 C2CD4D      |
| ENSG00000225558 | 0.499066092 | 0.950786998 | pseudogene       | 3  | 37176149  | 37176593 UBE2D3P2     |
| ENSG00000225568 | 0.499066092 | 0           | pseudogene       | 1  | 87511558  | 87512383              |
| ENSG00000225572 | 1.16343121  | 1.667587519 | antisense        | 7  | 111448572 | 111461829             |
| ENSG00000225573 | 1.16343121  | 1.353254395 | pseudogene       | 7  | 66071725  | 66072094 RPL35P5      |
| ENSG00000225578 | 2.10647801  | 2.420525079 | antisense        | 3  | 196666748 | 196669405 NCBP2-AS1   |
| ENSG00000225580 | 1.16343121  | 0.950786998 | pseudogene       | 6  | 112937905 | 112939082             |
| ENSG00000225591 | 0.499066092 | 0.390640832 | pseudogene       | 1  | 173710813 | 173711062             |
| ENSG00000225594 | 0.499066092 | 0           | pseudogene       | 2  | 132844862 | 132860137             |
| ENSG00000225595 | 0           | 0.697730409 | processed_transc | 6  | 28827402  | 28831127              |
| ENSG00000225602 | 0.499066092 | 0.390640832 | antisense        | 1  | 11203955  | 11209594 MTOR-AS1     |
| ENSG00000225603 | 1.16343121  | 0.390640832 | pseudogene       | 1  | 146522379 | 146524043             |
| ENSG00000225606 | 0.499066092 | 0           | antisense        | 7  | 12609751  | 12611017              |
| ENSG00000225611 | 0           | 1.16600992  | antisense        | 3  | 42812104  | 42815127              |
| ENSG00000225614 | 3.211941663 | 2.971122874 | protein_coding   | 16 | 88493879  | 88507165 ZNF469       |
| ENSG00000225616 | 4.062237333 | 4.385599336 | pseudogene       | 1  | 29308796  | 29309122              |
| ENSG00000225620 | 0           | 0.390640832 | lincRNA          | 1  | 202601556 | 202602039             |
| ENSG00000225627 | 0.869158192 | 0.390640832 | antisense        | 1  | 40747986  | 40749177              |
| ENSG00000225630 | 3.830412367 | 3.081239798 | pseudogene       | 1  | 565020    | 566063 MTND2P28       |
| ENSG00000225636 | 0           | 0.390640832 | pseudogene       | 2  | 197879714 | 197880739             |
| ENSG00000225643 | 1.960915222 | 2.579085888 | lincRNA          | 1  | 25907969  | 25916847              |
| ENSG00000225647 | 0.499066092 | 0           | lincRNA          | 7  | 108238819 | 108254711             |
| ENSG00000225648 | 7.947856304 | 7.86795666  | pseudogene       | 7  | 72300004  | 72307909 SBDSP1       |
| ENSG00000225650 | 0           | 0.390640832 | pseudogene       | 1  | 115010937 | 115011900 EIF2S2P5    |
| ENSG00000225656 | 0           | 0.390640832 | lincRNA          | 1  | 230959387 | 230960453             |
| ENSG00000225663 | 5.431503808 | 5.931169853 | protein_coding   | 17 | 79780293  | 79791167 FAM195B      |
| ENSG00000225665 | 0.499066092 | 0           | pseudogene       | 4  | 121263211 | 121263802             |
| ENSG00000225666 | 3.744048221 | 3.570966319 | antisense        | 7  | 156461646 | 156469257             |
| ENSG00000225667 | 3.004694206 | 3.532712221 | lincRNA          | 1  | 46921495  | 46948147 LINC00505    |
| ENSG00000225670 | 0.499066092 | 0           | antisense        | 1  | 159165775 | 159172177             |
| ENSG00000225674 | 0.869158192 | 1.16600992  | pseudogene       | 13 | 24696204  | 24697953 IPO7P2       |
| ENSG00000225675 | 0.869158192 | 1.667587519 | processed_transc | 1  | 53793921  | 53802890              |
| ENSG00000225676 | 0           | 0.950786998 | antisense        | 22 | 30580633  | 30603098              |
| ENSG00000225678 | 0           | 0.390640832 | pseudogene       | 11 | 102621801 | 102625674             |
| ENSG00000225684 | 3.911897206 | 3.845183986 | processed_transc | 9  | 115865618 | 115873780 LINC00256B  |
| ENSG00000225693 | 1.16343121  | 2.501982735 | pseudogene       | 9  | 33019680  | 33020163              |
| ENSG00000225695 | 0.869158192 | 0.950786998 | pseudogene       | 2  | 201927812 | 201928774             |
| ENSG00000225697 | 9.362260424 | 9.582956544 | protein_coding   | 3  | 48663156  | 48672926 SLC26A6      |
| ENSG00000225704 | 0.499066092 | 0           | pseudogene       | 1  | 171314228 | 171314459             |
| ENSG00000225711 | 0           | 0.390640832 | pseudogene       | 1  | 179190073 | 179191260             |
| ENSG00000225715 | 0.499066092 | 0.390640832 | pseudogene       | X  | 79965427  | 79966204              |
| ENSG00000225720 | 1.16343121  | 0           | pseudogene       | 22 | 39487591  | 39488860              |
| ENSG00000225721 | 1.960915222 | 1.518964905 | antisense        | 1  | 45224709  | 45241482              |
| ENSG00000225724 | 0           | 0.697730409 | pseudogene       | 22 | 22693926  | 22695567              |
| ENSG00000225725 | 1.16343121  | 1.16600992  | processed_transc | 8  | 7812536   | 7848219 FAM66E        |
| ENSG00000225726 | 1.16343121  | 2.242360793 | pseudogene       | 7  | 76701068  | 76701554              |
| ENSG00000225733 | 9.064459359 | 9.206061322 | antisense        | 3  | 14961854  | 14989931 FGD5-AS1     |
| ENSG00000225742 | 0.869158192 | 0           | lincRNA          | 3  | 193920805 | 193967942             |
| ENSG00000225744 | 0           | 0.697730409 | lincRNA          | 2  | 112365418 | 112370095             |
| ENSG00000225745 | 0.499066092 | 0.390640832 | processed_transc | 21 | 42548249  | 42558715              |
| ENSG00000225750 | 0           | 0.390640832 | lincRNA          | 1  | 29471006  | 29473506              |
| ENSG00000225751 | 0           | 0.950786998 | antisense        | 17 | 9364561   | 9373331               |
| ENSG00000225755 | 0           | 0.697730409 | pseudogene       | 1  | 163207004 | 163209345             |
| ENSG00000225756 | 6.386460534 | 6.030599799 | antisense        | 9  | 136519708 | 136522435 DBH-AS1     |
| ENSG00000225760 | 3.393122761 | 1.925536307 | lincRNA          | 13 | 111635654 | 111642911             |
| ENSG00000225761 | 2.35979773  | 0.950786998 | sense_intronic   | 10 | 75764895  | 75787673              |
| ENSG00000225762 | 3.744048221 | 4.075511708 | antisense        | 1  | 47846600  | 47874149              |
| ENSG00000225764 | 2.35979773  | 1.802319292 | antisense        | 3  | 189838753 | 189862635 LEPREL1-AS1 |
| ENSG00000225766 | 2.10647801  | 1.353254395 | pseudogene       | 14 | 24505662  | 24520237              |

|                 |             |             |                  |    |           |                      |
|-----------------|-------------|-------------|------------------|----|-----------|----------------------|
| ENSG00000225767 | 0           | 0.390640832 | antisense        | 1  | 50927141  | 50936822             |
| ENSG00000225770 | 0.499066092 | 0.950786998 | pseudogene       | 3  | 196263403 | 196263573            |
| ENSG00000225771 | 0.869158192 | 0.390640832 | antisense        | 1  | 62580420  | 62584681             |
| ENSG00000225774 | 0.499066092 | 0           | pseudogene       | 22 | 30938523  | 30940292 SIRPAP1     |
| ENSG00000225778 | 3.603959378 | 3.232099092 | antisense        | 10 | 11891612  | 11936699             |
| ENSG00000225779 | 0.869158192 | 0           | pseudogene       | 1  | 46836258  | 46836627             |
| ENSG00000225783 | 3.744048221 | 4.021284656 | processed_transc | 22 | 27042392  | 27072438 MIAT        |
| ENSG00000225790 | 2.10647801  | 3.570966319 | lincRNA          | 3  | 177652611 | 177655450            |
| ENSG00000225791 | 2.671945279 | 2.721932731 | processed_transc | 6  | 52442283  | 52444325             |
| ENSG00000225792 | 0.869158192 | 1.353254395 | antisense        | 7  | 26411764  | 26416321             |
| ENSG00000225793 | 0           | 0.950786998 | processed_transc | 6  | 75994730  | 76006283             |
| ENSG00000225796 | 0.869158192 | 0.950786998 | pseudogene       | 2  | 202078021 | 202079383 MTND4P23   |
| ENSG00000225798 | 0.499066092 | 1.353254395 | antisense        | 15 | 59182166  | 59186281             |
| ENSG00000225805 | 0           | 0.697730409 | pseudogene       | 11 | 71589499  | 71595607             |
| ENSG00000225806 | 0           | 0.697730409 | antisense        | 20 | 57438583  | 57463881             |
| ENSG00000225807 | 0           | 0.390640832 | lincRNA          | 7  | 100107340 | 100117549            |
| ENSG00000225808 | 3.146112541 | 2.039052734 | pseudogene       | 2  | 178093919 | 178094234            |
| ENSG00000225810 | 0.869158192 | 0.950786998 | processed_transc | 2  | 42592810  | 42652228             |
| ENSG00000225813 | 2.35979773  | 3.87606762  | pseudogene       | 2  | 162138413 | 162139129            |
| ENSG00000225820 | 1.799000381 | 1.518964905 | sense_intronic   | 1  | 8066074   | 8066784 ERRFI1-IT1   |
| ENSG00000225822 | 0           | 0.390640832 | antisense        | 3  | 196158256 | 196159401 UBXN7-AS1  |
| ENSG00000225823 | 0           | 0.390640832 | pseudogene       | 13 | 105466678 | 105467420 RPL7P45    |
| ENSG00000225826 | 0.869158192 | 0.390640832 | lincRNA          | 1  | 168756177 | 168762124            |
| ENSG00000225828 | 4.097495944 | 3.813624741 | protein_coding   | 1  | 32826871  | 32829879             |
| ENSG00000225830 | 8.116326397 | 8.529454305 | protein_coding   | 10 | 50663414  | 50747584 ERCC6       |
| ENSG00000225832 | 0           | 0.390640832 | pseudogene       | 6  | 20722559  | 20723886             |
| ENSG00000225836 | 0.499066092 | 0           | lincRNA          | 10 | 91406046  | 91410579             |
| ENSG00000225839 | 1.16343121  | 0.390640832 | antisense        | X  | 100297573 | 100298694 TRMT2B-AS1 |
| ENSG00000225840 | 4.568725997 | 4.528525526 | pseudogene       | Y  | 10036113  | 10036711 RN18S1      |
| ENSG00000225849 | 0.499066092 | 0           | pseudogene       | 20 | 45092541  | 45093763 MKRN7P      |
| ENSG00000225850 | 0           | 1.353254395 | antisense        | 10 | 99094321  | 99102960             |
| ENSG00000225854 | 0.869158192 | 0           | pseudogene       | 1  | 26653178  | 26653530             |
| ENSG00000225855 | 6.721980839 | 6.376734172 | antisense        | 1  | 155286654 | 155293967 RUSC1-AS1  |
| ENSG00000225857 | 0           | 0.697730409 | lincRNA          | 1  | 180875787 | 180878302            |
| ENSG00000225864 | 0.499066092 | 0.390640832 | pseudogene       | 6  | 29690758  | 29691748 HCG4P11     |
| ENSG00000225865 | 0.869158192 | 1.802319292 | lincRNA          | 20 | 42418584  | 42455002             |
| ENSG00000225867 | 1.16343121  | 0           | antisense        | 22 | 37946033  | 37947742             |
| ENSG00000225868 | 1.407729925 | 0.950786998 | lincRNA          | 19 | 38315798  | 38345836             |
| ENSG00000225869 | 0.869158192 | 0           | pseudogene       | 5  | 143131663 | 143132269            |
| ENSG00000225871 | 0           | 1.667587519 | pseudogene       | 1  | 147907215 | 147909056            |
| ENSG00000225872 | 0.499066092 | 0           | processed_transc | 19 | 36279778  | 36288787             |
| ENSG00000225874 | 0           | 0.697730409 | processed_transc | 6  | 38141449  | 38145069             |
| ENSG00000225877 | 0.499066092 | 2.039052734 | lincRNA          | 19 | 43326015  | 43331030             |
| ENSG00000225880 | 3.077135474 | 3.32456471  | lincRNA          | 1  | 761586    | 762902 LINC00115     |
| ENSG00000225885 | 0           | 0.390640832 | protein_coding   | 8  | 119294481 | 119412844            |
| ENSG00000225886 | 3.211941663 | 4.127774132 | antisense        | 1  | 27995979  | 27996787             |
| ENSG00000225889 | 0.499066092 | 1.353254395 | processed_transc | 2  | 64370373  | 64479993             |
| ENSG00000225891 | 0           | 0.390640832 | antisense        | 1  | 26789247  | 26793773             |
| ENSG00000225892 | 4.77879189  | 4.676215056 | pseudogene       | 4  | 119553429 | 119555914            |
| ENSG00000225899 | 0           | 0.390640832 | protein_coding   | 10 | 135437399 | 135440299 FRG2B      |
| ENSG00000225905 | 0.869158192 | 0           | antisense        | 1  | 1355625   | 1358071              |
| ENSG00000225911 | 0           | 0.390640832 | pseudogene       | 2  | 220913543 | 220913993            |
| ENSG00000225912 | 0.499066092 | 0           | pseudogene       | X  | 91931518  | 91931953             |
| ENSG00000225913 | 1.407729925 | 2.144285137 | processed_transc | 10 | 89367742  | 89419036             |
| ENSG00000225914 | 1.16343121  | 1.667587519 | antisense        | 6  | 32223488  | 32233615             |
| ENSG00000225915 | 0.869158192 | 1.16600992  | antisense        | 20 | 39809096  | 39825427             |
| ENSG00000225916 | 0.499066092 | 0.950786998 | lincRNA          | 2  | 208091673 | 208093032            |
| ENSG00000225918 | 0.499066092 | 0.697730409 | pseudogene       | 7  | 144737092 | 144738034            |
| ENSG00000225920 | 2.35979773  | 2.788380093 | pseudogene       | 1  | 219373258 | 219373909 RIMKLBP2   |
| ENSG00000225921 | 9.320904342 | 9.731784619 | protein_coding   | 6  | 13615559  | 13632971 NOL7        |
| ENSG00000225928 | 0           | 0.390640832 | pseudogene       | 10 | 86214441  | 86215812             |
| ENSG00000225929 | 0.499066092 | 0.697730409 | antisense        | 22 | 51174253  | 51176567             |
| ENSG00000225931 | 0           | 0.950786998 | antisense        | 1  | 2497849   | 2508811              |

|                 |             |             |                  |    |           |                       |
|-----------------|-------------|-------------|------------------|----|-----------|-----------------------|
| ENSG00000225933 | 0           | 0.390640832 | pseudogene       | 2  | 87954409  | 87954762              |
| ENSG00000225934 | 0           | 0.390640832 | pseudogene       | 1  | 227786128 | 227786795             |
| ENSG00000225938 | 0           | 0.390640832 | antisense        | 1  | 101701239 | 101702084             |
| ENSG00000225940 | 0.499066092 | 0.390640832 | protein_coding   | 5  | 55807394  | 55902059              |
| ENSG00000225946 | 2.238690726 | 0.950786998 | processed_transc | 7  | 100606878 | 100611410             |
| ENSG00000225950 | 0.499066092 | 0           | protein_coding   | 19 | 49559050  | 49568333              |
| ENSG00000225951 | 0.499066092 | 1.16600992  | antisense        | 9  | 131231236 | 131235291             |
| ENSG00000225953 | 1.616589159 | 2.039052734 | processed_transc | 2  | 200322423 | 200341658             |
| ENSG00000225963 | 0           | 1.802319292 | antisense        | 2  | 231036839 | 231038822             |
| ENSG00000225964 | 1.960915222 | 1.353254395 | antisense        | 2  | 6968645   | 6980595               |
| ENSG00000225965 | 0.499066092 | 0           | pseudogene       | 10 | 38450498  | 38450677              |
| ENSG00000225968 | 2.57521082  | 3.027231696 | protein_coding   | 7  | 1727755   | 1787590 ELFN1         |
| ENSG00000225969 | 1.799000381 | 2.144285137 | antisense        | 7  | 73149368  | 73150384 ABHD11-AS1   |
| ENSG00000225971 | 0.499066092 | 0.950786998 | pseudogene       | 22 | 30532662  | 30533670              |
| ENSG00000225972 | 4.903563137 | 4.17820932  | pseudogene       | 1  | 564442    | 564813 MTND1P23       |
| ENSG00000225973 | 5.239686603 | 4.826083323 | antisense        | 15 | 55609382  | 55611359              |
| ENSG00000225975 | 2.10647801  | 1.16600992  | antisense        | 19 | 37176216  | 37178351              |
| ENSG00000225978 | 3.78787645  | 4.048652948 | processed_transc | 20 | 61733557  | 61735738 HAR1A        |
| ENSG00000225981 | 0.869158192 | 1.518964905 | antisense        | 7  | 1499573   | 1503644               |
| ENSG00000225984 | 0.499066092 | 0           | pseudogene       | 1  | 229840981 | 229841608 HMGB1P26    |
| ENSG00000225985 | 1.16343121  | 1.667587519 | antisense        | 13 | 100143537 | 100144751             |
| ENSG00000225986 | 1.407729925 | 1.16600992  | antisense        | 1  | 20510735  | 20512979              |
| ENSG00000226002 | 2.471521042 | 2.971122874 | pseudogene       | 7  | 64544481  | 64560610              |
| ENSG00000226009 | 1.407729925 | 2.420525079 | antisense        | 10 | 103578835 | 103588536             |
| ENSG00000226015 | 2.928422289 | 2.652276565 | pseudogene       | 1  | 146674871 | 146676513 CCT8P1      |
| ENSG00000226017 | 0.869158192 | 0.697730409 | antisense        | 3  | 64173220  | 64186641 PRICKLE2-AS3 |
| ENSG00000226025 | 0.499066092 | 0.390640832 | lincRNA          | 19 | 40170014  | 40185217              |
| ENSG00000226026 | 0.869158192 | 0.390640832 | antisense        | 1  | 95628775  | 95699538              |
| ENSG00000226028 | 0.499066092 | 0.390640832 | pseudogene       | 1  | 149114655 | 149115188 PFN1P12     |
| ENSG00000226029 | 3.393122761 | 3.32456471  | lincRNA          | 1  | 16787443  | 16794976              |
| ENSG00000226036 | 0           | 0.390640832 | pseudogene       | 1  | 212820638 | 212821097             |
| ENSG00000226040 | 0           | 0.390640832 | pseudogene       | 5  | 141275733 | 141276254             |
| ENSG00000226044 | 2.10647801  | 1.16600992  | lincRNA          | 10 | 48324788  | 48332197              |
| ENSG00000226049 | 1.16343121  | 2.039052734 | pseudogene       | 17 | 32363700  | 32366891 TLK2P1       |
| ENSG00000226053 | 0           | 0.390640832 | processed_transc | 1  | 98676303  | 98738214              |
| ENSG00000226054 | 1.616589159 | 1.518964905 | pseudogene       | 21 | 37502669  | 37504208 MEMO1P1      |
| ENSG00000226055 | 1.799000381 | 1.925536307 | pseudogene       | 9  | 37878106  | 37879490 PAICSP1      |
| ENSG00000226056 | 0.499066092 | 0.390640832 | pseudogene       | X  | 102054870 | 102056327 MTND4P32    |
| ENSG00000226065 | 3.146112541 | 2.652276565 | pseudogene       | 2  | 111140689 | 111142219             |
| ENSG00000226067 | 5.223818625 | 5.41517489  | processed_transc | 1  | 149284645 | 149287106             |
| ENSG00000226070 | 0           | 0.390640832 | lincRNA          | 6  | 40326483  | 40337213              |
| ENSG00000226080 | 0.499066092 | 0           | pseudogene       | 2  | 11242268  | 11243123              |
| ENSG00000226082 | 0.869158192 | 0.950786998 | pseudogene       | 3  | 62912046  | 62912557              |
| ENSG00000226084 | 0           | 1.16600992  | pseudogene       | 1  | 77594768  | 77595384              |
| ENSG00000226085 | 0           | 1.16600992  | pseudogene       | 22 | 40271293  | 40272119 UQCRFS1P1    |
| ENSG00000226086 | 0.869158192 | 0.390640832 | pseudogene       | 10 | 38368984  | 38369805              |
| ENSG00000226087 | 0.869158192 | 0           | lincRNA          | 2  | 47452933  | 47466364              |
| ENSG00000226088 | 1.16343121  | 0.950786998 | antisense        | 1  | 70825245  | 70826120              |
| ENSG00000226091 | 2.762599152 | 3.453019579 | processed_transc | 12 | 8448582   | 8549399               |
| ENSG00000226094 | 0.869158192 | 0.697730409 | pseudogene       | 20 | 61169878  | 61170591 RPL7P3       |
| ENSG00000226101 | 0           | 0.697730409 | lincRNA          | 17 | 70068474  | 70089622              |
| ENSG00000226102 | 0.499066092 | 0           | pseudogene       | 7  | 35985904  | 36013282 SEPT7P3      |
| ENSG00000226104 | 1.16343121  | 0.697730409 | protein_coding   | 19 | 10751715  | 10752093              |
| ENSG00000226107 | 1.960915222 | 2.579085888 | pseudogene       | X  | 133656732 | 133657020             |
| ENSG00000226115 | 3.146112541 | 2.851901313 | lincRNA          | 21 | 47476430  | 47477481              |
| ENSG00000226120 | 0.869158192 | 2.039052734 | lincRNA          | 19 | 36198272  | 36199158              |
| ENSG00000226121 | 3.950976309 | 3.679994897 | pseudogene       | 2  | 162357396 | 162364216             |
| ENSG00000226124 | 3.335220907 | 3.87606762  | protein_coding   | 2  | 200625267 | 200715896             |
| ENSG00000226125 | 0.499066092 | 0.950786998 | lincRNA          | 2  | 231555636 | 231565244             |
| ENSG00000226126 | 1.16343121  | 0.697730409 | pseudogene       | 1  | 119156955 | 119158269 PSMC1P12    |
| ENSG00000226128 | 0           | 0.390640832 | pseudogene       | 1  | 98051418  | 98051850 RPL26P9      |
| ENSG00000226135 | 2.10647801  | 2.144285137 | sense_intronic   | 1  | 235989882 | 235991238 LYST-IT1    |
| ENSG00000226137 | 5.141750194 | 4.448594745 | protein_coding   | 17 | 79003502  | 79005315              |

|                 |             |             |                  |    |           |                        |
|-----------------|-------------|-------------|------------------|----|-----------|------------------------|
| ENSG00000226138 | 0           | 0.697730409 | pseudogene       | 12 | 48478833  | 48479204               |
| ENSG00000226144 | 0.499066092 | 0.390640832 | pseudogene       | 20 | 35677657  | 35678102 RPS27AP3      |
| ENSG00000226148 | 0.499066092 | 1.667587519 | pseudogene       | 1  | 202765158 | 202766222              |
| ENSG00000226150 | 0.869158192 | 1.16600992  | processed_transc | 7  | 6833765   | 6836573                |
| ENSG00000226155 | 0.499066092 | 1.518964905 | antisense        | 3  | 195638920 | 195640857              |
| ENSG00000226158 | 0           | 0.390640832 | pseudogene       | 13 | 115072121 | 115072541 CLCP2        |
| ENSG00000226161 | 0.869158192 | 1.925536307 | pseudogene       | 13 | 37512537  | 37513631 EIF4A1P5      |
| ENSG00000226167 | 1.960915222 | 2.420525079 | processed_transc | 1  | 114399257 | 114443859              |
| ENSG00000226169 | 0           | 0.390640832 | antisense        | 22 | 28112468  | 28117665               |
| ENSG00000226174 | 3.448790144 | 3.027231696 | protein_coding   | 14 | 105864916 | 105916443 TEX22        |
| ENSG00000226179 | 3.077135474 | 2.788380093 | antisense        | X  | 281725    | 282586 PPP2R3B-AS1     |
| ENSG00000226180 | 3.698846687 | 4.7279204   | protein_coding   | 16 | 87727144  | 87729753               |
| ENSG00000226186 | 0.499066092 | 1.16600992  | pseudogene       | 2  | 71183029  | 71183364 TCEB1P21      |
| ENSG00000226188 | 0.499066092 | 1.802319292 | pseudogene       | 20 | 44374376  | 44374926 HNRNPA1P3     |
| ENSG00000226194 | 0           | 0.390640832 | lincRNA          | 6  | 169770093 | 169788480              |
| ENSG00000226200 | 0.869158192 | 0           | antisense        | 10 | 52388910  | 52391396               |
| ENSG00000226203 | 1.799000381 | 3.133298822 | lincRNA          | 20 | 25936448  | 25949924               |
| ENSG00000226205 | 0           | 0.697730409 | pseudogene       | 7  | 133417246 | 133418348              |
| ENSG00000226210 | 6.414691513 | 6.490875274 | pseudogene       | 12 | 73725     | 91223                  |
| ENSG00000226216 | 0           | 0.390640832 | pseudogene       | 3  | 29432339  | 29432709 RPS12P5       |
| ENSG00000226220 | 1.16343121  | 1.16600992  | pseudogene       | 7  | 39836192  | 39837510               |
| ENSG00000226221 | 2.471521042 | 2.912743273 | pseudogene       | 5  | 55800462  | 55800899               |
| ENSG00000226232 | 0.869158192 | 0.697730409 | protein_coding   | 16 | 70010291  | 70099851               |
| ENSG00000226233 | 0.499066092 | 0           | pseudogene       | 22 | 37611778  | 37611931               |
| ENSG00000226234 | 0           | 0.950786998 | pseudogene       | 9  | 81651329  | 81652484               |
| ENSG00000226235 | 0.499066092 | 0           | antisense        | 1  | 205342380 | 205356568              |
| ENSG00000226239 | 0           | 0.390640832 | antisense        | 20 | 30615556  | 30619378               |
| ENSG00000226241 | 0           | 0.390640832 | pseudogene       | X  | 102342124 | 102344204              |
| ENSG00000226243 | 1.16343121  | 1.667587519 | pseudogene       | 20 | 43095204  | 43095482 RPL37AP1      |
| ENSG00000226245 | 1.799000381 | 1.802319292 | antisense        | 10 | 44139320  | 44140495 ZNF32-AS1     |
| ENSG00000226253 | 0.499066092 | 0           | pseudogene       | 10 | 76287342  | 76287705 MRPL35P3      |
| ENSG00000226254 | 0.499066092 | 0           | pseudogene       | 7  | 90736689  | 90737108 PTP4A1P3      |
| ENSG00000226259 | 2.10647801  | 2.652276565 | pseudogene       | 5  | 69711179  | 69743885 GTF2H2B       |
| ENSG00000226261 | 0           | 0.697730409 | pseudogene       | 2  | 203200747 | 203201450              |
| ENSG00000226263 | 1.16343121  | 1.353254395 | antisense        | 20 | 13218448  | 13220321               |
| ENSG00000226266 | 1.407729925 | 2.334191469 | processed_transc | 2  | 160527219 | 160568941              |
| ENSG00000226268 | 0.499066092 | 0.390640832 | pseudogene       | 11 | 49455025  | 49455990               |
| ENSG00000226272 | 0           | 0.697730409 | antisense        | 5  | 142239169 | 142248487 ARHGAP26-AS1 |
| ENSG00000226278 | 3.554067925 | 4.250702764 | pseudogene       | 7  | 55832490  | 55840981 PSPHP1        |
| ENSG00000226279 | 1.407729925 | 1.925536307 | pseudogene       | 7  | 22921512  | 22922009               |
| ENSG00000226284 | 1.799000381 | 1.518964905 | pseudogene       | 20 | 47751017  | 47751549 ARPC3P1       |
| ENSG00000226286 | 0           | 0.390640832 | antisense        | 1  | 3049491   | 3050273                |
| ENSG00000226287 | 2.238690726 | 1.353254395 | processed_transc | 22 | 21055220  | 21058894 TMEM191A      |
| ENSG00000226288 | 0           | 0.697730409 | protein_coding   | 11 | 4608021   | 4609135 OR52I2         |
| ENSG00000226291 | 0.869158192 | 0.390640832 | antisense        | 7  | 1120499   | 1121814                |
| ENSG00000226301 | 0           | 0.390640832 | pseudogene       | 8  | 61299821  | 61300554               |
| ENSG00000226302 | 0           | 0.390640832 | lincRNA          | 3  | 40644616  | 40646918               |
| ENSG00000226306 | 0           | 1.16600992  | pseudogene       | 5  | 137136882 | 137146440 NPY6R        |
| ENSG00000226310 | 0.499066092 | 2.334191469 | antisense        | X  | 57148095  | 57153676               |
| ENSG00000226312 | 2.471521042 | 1.16600992  | antisense        | 2  | 202005007 | 202022515 CFLAR-AS1    |
| ENSG00000226314 | 4.593635215 | 4.622587519 | pseudogene       | 6  | 28129559  | 28137372 ZNF192P1      |
| ENSG00000226318 | 1.799000381 | 2.420525079 | pseudogene       | 10 | 69720459  | 69721221               |
| ENSG00000226327 | 0.499066092 | 0.950786998 | pseudogene       | 9  | 90939405  | 90940255               |
| ENSG00000226328 | 7.140657543 | 7.799123587 | processed_transc | 22 | 45529710  | 45559662               |
| ENSG00000226329 | 4.6658819   | 4.604259349 | pseudogene       | 7  | 22903493  | 22920969               |
| ENSG00000226330 | 1.16343121  | 0.697730409 | processed_transc | 1  | 204346978 | 204404974              |
| ENSG00000226332 | 4.77879189  | 4.226940739 | antisense        | 20 | 60880488  | 60881452               |
| ENSG00000226334 | 1.799000381 | 0.950786998 | processed_transc | 9  | 107689834 | 107691173              |
| ENSG00000226338 | 0           | 0.697730409 | pseudogene       | 2  | 154064600 | 154064677              |
| ENSG00000226342 | 1.960915222 | 0.950786998 | pseudogene       | 7  | 63369344  | 63370831 NMD3P1        |
| ENSG00000226345 | 0           | 0.390640832 | pseudogene       | 3  | 196150193 | 196150393              |
| ENSG00000226348 | 0           | 0.697730409 | pseudogene       | 16 | 77254303  | 77255155 VN2R10P       |
| ENSG00000226349 | 0           | 0.697730409 | sense_intronic   | 1  | 225898670 | 225923976              |

|                 |             |             |                  |    |           |           |            |
|-----------------|-------------|-------------|------------------|----|-----------|-----------|------------|
| ENSG00000226352 | 2.762599152 | 2.420525079 | processed_transc | 13 | 20248764  | 20250024  | PSPC1-OT1  |
| ENSG00000226359 | 1.407729925 | 1.802319292 | pseudogene       | 17 | 17145324  | 17146200  |            |
| ENSG00000226360 | 4.437288965 | 4.810179682 | pseudogene       | 3  | 61728129  | 61728780  | RPL10AP6   |
| ENSG00000226361 | 0.499066092 | 0.697730409 | pseudogene       | 13 | 19254634  | 19255846  | TERF1P5    |
| ENSG00000226367 | 0           | 0.950786998 | antisense        | 7  | 116712126 | 116786534 | ST7-AS2    |
| ENSG00000226377 | 0.869158192 | 0           | antisense        | 17 | 31203777  | 31205655  |            |
| ENSG00000226380 | 4.863159938 | 4.021284656 | processed_transc | 7  | 130565751 | 130598069 |            |
| ENSG00000226381 | 3.448790144 | 3.993387124 | processed_transc | 10 | 81524486  | 81546199  |            |
| ENSG00000226383 | 1.960915222 | 1.353254395 | lincRNA          | 2  | 156868129 | 156881125 |            |
| ENSG00000226386 | 0.499066092 | 0.697730409 | antisense        | 10 | 35104695  | 35105314  |            |
| ENSG00000226390 | 0.499066092 | 1.16600992  | antisense        | 20 | 62079404  | 62080682  |            |
| ENSG00000226393 | 0           | 0.950786998 | pseudogene       | 9  | 21321299  | 21321826  | IFNA20P    |
| ENSG00000226396 | 1.616589159 | 2.420525079 | pseudogene       | 1  | 19934608  | 19935062  |            |
| ENSG00000226406 | 0           | 0.390640832 | pseudogene       | 21 | 16201475  | 16202310  | RBMX2P1    |
| ENSG00000226410 | 0.499066092 | 0.697730409 | pseudogene       | 2  | 187027676 | 187027972 |            |
| ENSG00000226413 | 0           | 0.950786998 | pseudogene       | 12 | 48835813  | 48836730  | OR8T1P     |
| ENSG00000226415 | 3.698846687 | 3.748356452 | pseudogene       | 1  | 77165474  | 77166223  | TPI1P1     |
| ENSG00000226416 | 4.618121645 | 5.085909553 | antisense        | 11 | 2004467   | 2011150   | MRPL23-AS1 |
| ENSG00000226419 | 5.090170488 | 5.163066621 | processed_transc | 1  | 113499037 | 113544813 |            |
| ENSG00000226421 | 0.499066092 | 0           | pseudogene       | 7  | 32511125  | 32512021  |            |
| ENSG00000226423 | 0.499066092 | 1.353254395 | lincRNA          | 2  | 242967334 | 242968327 |            |
| ENSG00000226425 | 0           | 0.390640832 | antisense        | 10 | 94819420  | 94820183  |            |
| ENSG00000226427 | 0           | 0.390640832 | pseudogene       | 3  | 15416880  | 15417152  | HMG2P7     |
| ENSG00000226432 | 0.499066092 | 0           | pseudogene       | 5  | 24170479  | 24171355  |            |
| ENSG00000226434 | 1.16343121  | 0           | lincRNA          | X  | 13395307  | 13421138  |            |
| ENSG00000226435 | 0           | 0.697730409 | pseudogene       | 3  | 197780393 | 197807591 | ANKRD18DP  |
| ENSG00000226436 | 0           | 0.950786998 | pseudogene       | X  | 28677182  | 28677586  |            |
| ENSG00000226438 | 0           | 0.390640832 | antisense        | 1  | 39715510  | 39723321  |            |
| ENSG00000226439 | 0           | 0.390640832 | pseudogene       | 4  | 62641167  | 62641568  |            |
| ENSG00000226443 | 0.869158192 | 1.667587519 | pseudogene       | 1  | 120076372 | 120077369 | GAPDHP32   |
| ENSG00000226445 | 3.698846687 | 4.693656882 | antisense        | 6  | 169613349 | 169639660 |            |
| ENSG00000226450 | 2.35979773  | 3.027231696 | pseudogene       | 22 | 42545877  | 42551007  | CYP2D8P1   |
| ENSG00000226453 | 0           | 0.390640832 | lincRNA          | 6  | 82554902  | 82643197  |            |
| ENSG00000226457 | 1.16343121  | 1.518964905 | pseudogene       | 1  | 16695645  | 16696025  |            |
| ENSG00000226458 | 3.211941663 | 1.16600992  | sense_intronic   | 10 | 75788171  | 75789962  |            |
| ENSG00000226465 | 2.238690726 | 2.501982735 | antisense        | 20 | 25731854  | 25733397  |            |
| ENSG00000226466 | 0           | 0.697730409 | pseudogene       | 10 | 82896296  | 82897091  |            |
| ENSG00000226469 | 0.869158192 | 1.802319292 | pseudogene       | 12 | 112364822 | 112366821 |            |
| ENSG00000226471 | 3.274897671 | 3.133298822 | antisense        | 22 | 29196671  | 29244547  |            |
| ENSG00000226472 | 1.407729925 | 1.802319292 | lincRNA          | 12 | 31149973  | 31158938  |            |
| ENSG00000226476 | 3.603959378 | 3.845183986 | lincRNA          | 1  | 61005921  | 61106163  |            |
| ENSG00000226478 | 0           | 0.390640832 | pseudogene       | 17 | 16648945  | 16650075  | UPF3AP1    |
| ENSG00000226479 | 8.848626402 | 8.310945169 | protein_coding   | 2  | 120978854 | 120980984 | TMEM185B   |
| ENSG00000226484 | 0           | 0.390640832 | processed_transc | X  | 36383741  | 36458375  |            |
| ENSG00000226491 | 0           | 0.697730409 | pseudogene       | 2  | 43024365  | 43025852  |            |
| ENSG00000226493 | 1.799000381 | 1.667587519 | pseudogene       | 10 | 70259289  | 70259725  |            |
| ENSG00000226496 | 0.499066092 | 1.518964905 | antisense        | 21 | 42513427  | 42520060  | LINC00323  |
| ENSG00000226498 | 0           | 0.390640832 | pseudogene       | 1  | 236982934 | 236983813 |            |
| ENSG00000226501 | 0           | 0.390640832 | pseudogene       | 21 | 34706877  | 34707402  | USF1P1     |
| ENSG00000226510 | 0.499066092 | 1.353254395 | antisense        | 19 | 36158850  | 36164193  | UPK1A-AS1  |
| ENSG00000226520 | 2.762599152 | 2.501982735 | sense_intronic   | 1  | 157995340 | 158000956 | KIRREL-IT1 |
| ENSG00000226521 | 0           | 0.950786998 | pseudogene       | 17 | 20619796  | 20640440  |            |
| ENSG00000226524 | 0           | 1.518964905 | lincRNA          | 6  | 88081311  | 88102519  |            |
| ENSG00000226525 | 0.499066092 | 0.950786998 | pseudogene       | 13 | 22202552  | 22203154  | RPS7P10    |
| ENSG00000226533 | 0.499066092 | 0           | antisense        | 6  | 38449468  | 38450307  | BTBD9-AS1  |
| ENSG00000226535 | 0           | 0.390640832 | pseudogene       | 9  | 109931850 | 109933429 |            |
| ENSG00000226539 | 0           | 0.697730409 | pseudogene       | 2  | 224569338 | 224570055 |            |
| ENSG00000226540 | 1.16343121  | 1.518964905 | pseudogene       | 6  | 135940303 | 135941309 | GAPDHP73   |
| ENSG00000226544 | 0           | 0.697730409 | pseudogene       | 5  | 72021246  | 72021978  | RPL7P22    |
| ENSG00000226545 | 0.499066092 | 0           | pseudogene       | 1  | 8858534   | 8859565   |            |
| ENSG00000226549 | 1.16343121  | 1.353254395 | pseudogene       | 17 | 20687958  | 20689040  | SCDP1      |
| ENSG00000226556 | 0.499066092 | 0.390640832 | pseudogene       | X  | 47298135  | 47299173  |            |
| ENSG00000226561 | 0.499066092 | 0           | sense_intronic   | 10 | 52348409  | 52349592  |            |

|                 |             |             |                    |    |           |           |
|-----------------|-------------|-------------|--------------------|----|-----------|-----------|
| ENSG00000226562 | 1.16343121  | 1.925536307 | lincRNA            | 9  | 33602499  | 33605291  |
| ENSG00000226564 | 4.165528823 | 3.781359661 | pseudogene         | 2  | 181737594 | 181738141 |
| ENSG00000226573 | 0.499066092 | 0           | pseudogene         | 22 | 30501083  | 30501397  |
| ENSG00000226574 | 0           | 0.697730409 | processed_transc X |    | 140590843 | 140738057 |
| ENSG00000226578 | 2.238690726 | 3.781359661 | lincRNA            | 10 | 38064299  | 38073059  |
| ENSG00000226580 | 1.616589159 | 2.242360793 | pseudogene         | 21 | 18872997  | 18873142  |
| ENSG00000226581 | 1.616589159 | 1.353254395 | lincRNA            | 7  | 63361201  | 63378372  |
| ENSG00000226585 | 0.869158192 | 1.353254395 | antisense          | 1  | 178326311 | 178333230 |
| ENSG00000226602 | 1.16343121  | 1.518964905 | sense_intronic     | 9  | 131448620 | 131449914 |
| ENSG00000226604 | 0           | 0.697730409 | antisense          | 9  | 119048108 | 119051048 |
| ENSG00000226608 | 3.335220907 | 3.96493948  | pseudogene         | 20 | 4004552   | 4005091   |
| ENSG00000226609 | 0           | 1.16600992  | antisense          | 9  | 115511182 | 115512736 |
| ENSG00000226621 | 0.499066092 | 0.950786998 | pseudogene         | 3  | 11332092  | 11332349  |
| ENSG00000226624 | 0.869158192 | 0.950786998 | pseudogene         | 7  | 105459938 | 105460547 |
| ENSG00000226628 | 3.78787645  | 3.570966319 | pseudogene         | 1  | 1667256   | 1668690   |
| ENSG00000226631 | 0.499066092 | 0.390640832 | pseudogene         | 10 | 51784895  | 51787123  |
| ENSG00000226632 | 0.869158192 | 0.390640832 | pseudogene         | 20 | 3342527   | 3342971   |
| ENSG00000226636 | 0           | 0.390640832 | pseudogene         | 7  | 121799354 | 121802297 |
| ENSG00000226637 | 0           | 0.390640832 | processed_transc   | 1  | 143719663 | 143721171 |
| ENSG00000226641 | 0           | 0.390640832 | pseudogene X       |    | 41181854  | 41182364  |
| ENSG00000226642 | 0.499066092 | 0           | pseudogene         | 3  | 12111695  | 12112860  |
| ENSG00000226644 | 1.799000381 | 2.652276565 | lincRNA            | 20 | 2187863   | 2193797   |
| ENSG00000226645 | 1.616589159 | 1.16600992  | antisense          | 11 | 116644105 | 116644921 |
| ENSG00000226647 | 0.499066092 | 1.16600992  | antisense          | 10 | 5754177   | 5786030   |
| ENSG00000226648 | 0.499066092 | 0.390640832 | antisense          | 20 | 39726969  | 39766643  |
| ENSG00000226649 | 1.407729925 | 1.16600992  | lincRNA            | 2  | 3160527   | 3161568   |
| ENSG00000226650 | 1.960915222 | 1.518964905 | protein_coding     | 5  | 154393315 | 154397692 |
| ENSG00000226652 | 0.499066092 | 0           | pseudogene         | 3  | 186478893 | 186479564 |
| ENSG00000226653 | 0           | 0.390640832 | pseudogene         | 1  | 146890786 | 146891588 |
| ENSG00000226659 | 2.762599152 | 1.802319292 | antisense          | 10 | 82289353  | 82295698  |
| ENSG00000226661 | 0.869158192 | 0           | antisense X        |    | 118490264 | 118527558 |
| ENSG00000226665 | 0.499066092 | 0           | pseudogene         | 13 | 75710291  | 75711077  |
| ENSG00000226666 | 2.671945279 | 2.334191469 | pseudogene         | 2  | 222826456 | 222828484 |
| ENSG00000226667 | 0           | 0.697730409 | lincRNA            | 10 | 47570513  | 47573855  |
| ENSG00000226668 | 0           | 0.697730409 | pseudogene         | 9  | 95644849  | 95661890  |
| ENSG00000226673 | 0.869158192 | 1.16600992  | lincRNA            | 6  | 14280358  | 14285376  |
| ENSG00000226674 | 1.16343121  | 1.16600992  | lincRNA            | 2  | 145425534 | 145940216 |
| ENSG00000226675 | 0.499066092 | 0           | pseudogene         | 1  | 148598464 | 148598976 |
| ENSG00000226677 | 0.499066092 | 0.697730409 | pseudogene         | 14 | 35408530  | 35409693  |
| ENSG00000226686 | 3.077135474 | 3.493416095 | processed_transc   | 19 | 37742828  | 37747421  |
| ENSG00000226688 | 3.871730003 | 4.585695337 | processed_transc   | 10 | 97512963  | 97849995  |
| ENSG00000226695 | 0.869158192 | 0           | pseudogene         | 13 | 25324795  | 25326309  |
| ENSG00000226696 | 4.942865586 | 4.961837817 | antisense          | 19 | 54955991  | 54960223  |
| ENSG00000226698 | 2.928422289 | 3.027231696 | antisense          | 1  | 27202624  | 27204736  |
| ENSG00000226699 | 1.16343121  | 1.518964905 | antisense          | 10 | 135159258 | 135164230 |
| ENSG00000226701 | 0.499066092 | 1.16600992  | pseudogene         | 10 | 73949699  | 73950334  |
| ENSG00000226702 | 0           | 0.390640832 | lincRNA            | 2  | 56190326  | 56274461  |
| ENSG00000226706 | 1.407729925 | 2.652276565 | antisense          | 9  | 138395119 | 138398293 |
| ENSG00000226708 | 0           | 0.950786998 | lincRNA            | 2  | 124200842 | 124202021 |
| ENSG00000226711 | 3.393122761 | 4.640685763 | antisense          | 12 | 8332805   | 8368747   |
| ENSG00000226723 | 0           | 1.16600992  | pseudogene         | 1  | 192215849 | 192216617 |
| ENSG00000226738 | 5.575999561 | 4.363974406 | antisense          | 22 | 50984844  | 50986081  |
| ENSG00000226741 | 0.499066092 | 0           | lincRNA            | 22 | 27706612  | 27713417  |
| ENSG00000226742 | 6.196276899 | 5.647721597 | protein_coding     | 18 | 77724582  | 77730820  |
| ENSG00000226745 | 0           | 0.950786998 | pseudogene         | 1  | 40598434  | 40599121  |
| ENSG00000226746 | 1.960915222 | 2.721932731 | protein_coding     | 17 | 17680000  | 17682843  |
| ENSG00000226752 | 7.1740722   | 7.799123587 | processed_transc   | 9  | 123605378 | 123616651 |
| ENSG00000226754 | 4.261916566 | 4.101879561 | processed_transc   | 1  | 53704282  | 53708455  |
| ENSG00000226756 | 1.16343121  | 0           | lincRNA            | 2  | 64871746  | 64873832  |
| ENSG00000226758 | 0.869158192 | 0.390640832 | sense_intronic     | 1  | 232061580 | 232080979 |
| ENSG00000226761 | 0.499066092 | 0           | protein_coding     | 12 | 11213964  | 11214893  |
| ENSG00000226763 | 3.78787645  | 3.748356452 | protein_coding     | 19 | 44100769  | 44118649  |
| ENSG00000226766 | 0.499066092 | 0           | pseudogene         | 1  | 243787968 | 243788358 |



|                 |             |             |                    |    |           |           |              |
|-----------------|-------------|-------------|--------------------|----|-----------|-----------|--------------|
| ENSG00000226772 | 0.499066092 |             | 0 antisense        | 22 | 29495029  | 29507671  |              |
| ENSG00000226779 | 0           | 0.390640832 | antisense          | 3  | 174952651 | 174988885 | NAALADL2-AS2 |
| ENSG00000226783 | 0           | 0.390640832 | pseudogene         | 9  | 125448212 | 125450651 | TLK1P1       |
| ENSG00000226784 | 0           | 1.925536307 | protein_coding     | X  | 77223458  | 77225135  | PGAM4        |
| ENSG00000226786 | 0           | 0.390640832 | processed_transc   | 6  | 19535175  | 19640814  |              |
| ENSG00000226789 | 0.499066092 | 0.390640832 | pseudogene         | 2  | 128004834 | 128007658 |              |
| ENSG00000226790 | 0.869158192 | 0.390640832 | pseudogene         | 10 | 44282860  | 44285865  | HNRNPA3P1    |
| ENSG00000226793 | 0           | 0.390640832 | pseudogene         | 9  | 67348382  | 67348907  |              |
| ENSG00000226797 | 0.869158192 | 1.353254395 | antisense          | 17 | 61458592  | 61491673  |              |
| ENSG00000226798 | 1.16343121  | 1.518964905 | lincRNA            | 9  | 83484673  | 83486210  |              |
| ENSG00000226800 | 0.499066092 |             | 0 protein_coding   | 19 | 3611566   | 3619189   | C19orf29-AS1 |
| ENSG00000226801 | 1.407729925 | 1.353254395 | pseudogene         | 9  | 33968075  | 33968516  |              |
| ENSG00000226803 | 1.616589159 | 0.950786998 | processed_transc   | 6  | 56979709  | 57037194  |              |
| ENSG00000226806 | 0.869158192 |             | 0 antisense        | 2  | 136577761 | 136580657 |              |
| ENSG00000226807 | 1.16343121  |             | 0 polymorphic_pse  | 8  | 142443929 | 142517330 |              |
| ENSG00000226819 | 0.869158192 | 0.390640832 | antisense          | 2  | 66653867  | 66660602  |              |
| ENSG00000226823 | 2.10647801  | 2.144285137 | pseudogene         | 9  | 33503653  | 33510709  |              |
| ENSG00000226824 | 3.335220907 | 2.971122874 | sense_intronic     | 7  | 66119525  | 66134842  |              |
| ENSG00000226828 | 0.499066092 |             | 0 processed_transc | 1  | 244080704 | 244210619 |              |
| ENSG00000226833 | 1.616589159 | 2.334191469 | antisense          | 2  | 28931819  | 28959071  |              |
| ENSG00000226835 | 1.16343121  | 1.802319292 | lincRNA            | 1  | 94798823  | 94800404  |              |
| ENSG00000226842 | 0.499066092 | 0.390640832 | antisense          | 10 | 32570614  | 32571757  |              |
| ENSG00000226845 | 0.499066092 |             | 0 pseudogene       | 3  | 40637698  | 40638985  |              |
| ENSG00000226849 | 1.799000381 | 0.697730409 | antisense          | 1  | 11128528  | 11133154  |              |
| ENSG00000226853 | 2.471521042 | 2.242360793 | lincRNA            | 2  | 175352117 | 175353028 |              |
| ENSG00000226855 | 1.616589159 | 0.950786998 | pseudogene         | 1  | 154350683 | 154351565 |              |
| ENSG00000226856 | 1.407729925 | 2.039052734 | lincRNA            | 2  | 118889704 | 118943962 |              |
| ENSG00000226862 | 0.869158192 | 0.697730409 | antisense          | 1  | 202573396 | 202574421 |              |
| ENSG00000226864 | 2.238690726 | 3.081239798 | antisense          | 10 | 123687827 | 123711480 |              |
| ENSG00000226872 | 0.499066092 | 0.697730409 | antisense          | 22 | 21385646  | 21398258  |              |
| ENSG00000226874 | 1.16343121  | 1.16600992  | pseudogene         | 7  | 30583669  | 30584047  |              |
| ENSG00000226876 | 0           | 0.390640832 | antisense          | 1  | 246271928 | 246277168 |              |
| ENSG00000226877 | 1.616589159 | 1.925536307 | antisense          | 9  | 86444571  | 86452779  |              |
| ENSG00000226878 | 0.499066092 | 0.390640832 | pseudogene         | 2  | 159912606 | 159913371 | GSTM3P2      |
| ENSG00000226881 | 0           | 0.390640832 | pseudogene         | X  | 50648438  | 50648866  | H3F3AP5      |
| ENSG00000226883 | 0           | 0.390640832 | antisense          | 1  | 60220419  | 60254854  |              |
| ENSG00000226887 | 4.689181911 | 4.021284656 | lincRNA            | 4  | 53588785  | 53617807  | ERVMER34-1   |
| ENSG00000226889 | 0.869158192 | 1.353254395 | antisense          | 1  | 161732646 | 161736000 |              |
| ENSG00000226890 | 0           | 0.390640832 | antisense          | 16 | 1675629   | 1676161   |              |
| ENSG00000226891 | 1.616589159 | 0.697730409 | processed_transc   | 1  | 65437908  | 65468159  |              |
| ENSG00000226899 | 0           | 0.390640832 | antisense          | 10 | 126633773 | 126635001 |              |
| ENSG00000226907 | 0.869158192 | 0.390640832 | protein_coding     | X  | 134961634 | 134971244 | CT45A6       |
| ENSG00000226908 | 0           | 0.390640832 | pseudogene         | 13 | 22057973  | 22058313  | HIST1H2BPS3  |
| ENSG00000226912 | 0.869158192 | 0.950786998 | pseudogene         | 22 | 27040853  | 27041300  | ISCA2P1      |
| ENSG00000226913 | 1.16343121  | 1.353254395 | processed_transc   | 3  | 49586739  | 49591799  | BSN-AS2      |
| ENSG00000226915 | 0           | 0.390640832 | pseudogene         | 2  | 131051395 | 131051978 |              |
| ENSG00000226917 | 0.499066092 | 0.697730409 | lincRNA            | 6  | 41470182  | 41487590  |              |
| ENSG00000226920 | 2.238690726 | 2.788380093 | lincRNA            | 1  | 229576031 | 229576767 |              |
| ENSG00000226925 | 0.499066092 |             | 0 antisense        | 2  | 102789081 | 102798568 |              |
| ENSG00000226933 | 0           | 0.697730409 | pseudogene         | 3  | 46064788  | 46065648  |              |
| ENSG00000226937 | 0.499066092 | 0.390640832 | processed_transc   | 10 | 45497679  | 45567036  |              |
| ENSG00000226942 | 3.78787645  | 3.411459265 | pseudogene         | 16 | 79336     | 88321     | IL9RP3       |
| ENSG00000226943 | 0.499066092 | 0.390640832 | pseudogene         | 7  | 6963435   | 6970466   |              |
| ENSG00000226944 | 1.407729925 | 1.667587519 | antisense          | 1  | 6264900   | 6265840   |              |
| ENSG00000226945 | 2.928422289 | 2.039052734 | pseudogene         | 1  | 207080964 | 207081574 |              |
| ENSG00000226948 | 0.869158192 | 0.697730409 | pseudogene         | 20 | 4610073   | 4610865   |              |
| ENSG00000226950 | 8.366258896 | 9.076603748 | processed_transc   | 4  | 53578597  | 53586518  | SNHG13       |
| ENSG00000226952 | 0           | 0.950786998 | pseudogene         | 1  | 100564795 | 100565046 |              |
| ENSG00000226954 | 0           | 0.390640832 | processed_transc   | 22 | 50111701  | 50118154  |              |
| ENSG00000226957 | 0.499066092 | 0.390640832 | antisense          | 1  | 46512490  | 46514040  |              |
| ENSG00000226958 | 15.13978265 | 15.21036828 | pseudogene         | X  | 108297361 | 108297792 | RN28S1       |
| ENSG00000226961 | 0.499066092 | 0.697730409 | pseudogene         | 2  | 11491753  | 11492250  |              |
| ENSG00000226964 | 0           | 0.390640832 | pseudogene         | 10 | 47396223  | 47396822  |              |

|                 |             |             |                  |    |           |           |           |
|-----------------|-------------|-------------|------------------|----|-----------|-----------|-----------|
| ENSG00000226966 | 0.499066092 | 0.950786998 | sense_intronic   | 17 | 19174706  | 19177701  | EPN2-IT1  |
| ENSG00000226967 | 0           | 0.390640832 | pseudogene       | 1  | 170338364 | 170339508 |           |
| ENSG00000226969 | 0           | 0.390640832 | antisense        | 1  | 1980642   | 1981509   |           |
| ENSG00000226971 | 0.869158192 | 0           | pseudogene       | X  | 48305273  | 48307251  |           |
| ENSG00000226972 | 0.869158192 | 0.390640832 | pseudogene       | 2  | 44497760  | 44498247  |           |
| ENSG00000226973 | 0.499066092 | 2.144285137 | pseudogene       | 1  | 116014562 | 116018648 |           |
| ENSG00000226976 | 2.57521082  | 3.081239798 | protein_coding   | 6  | 37012607  | 37013177  | COX6A1P2  |
| ENSG00000226977 | 0.499066092 | 0.697730409 | pseudogene       | 13 | 96461564  | 96461861  | HMG1P24   |
| ENSG00000226979 | 3.448790144 | 1.925536307 | protein_coding   | 6  | 31539831  | 31542101  | LTA       |
| ENSG00000226981 | 1.16343121  | 0.390640832 | pseudogene       | 17 | 20744360  | 20747570  | FAM108A7P |
| ENSG00000226982 | 0.499066092 | 1.16600992  | pseudogene       | 12 | 89893870  | 89896447  | CENPC1P1  |
| ENSG00000226984 | 0           | 0.950786998 | pseudogene       | 1  | 115002556 | 115002982 |           |
| ENSG00000226985 | 0           | 0.390640832 | lincRNA          | X  | 13353360  | 13391753  |           |
| ENSG00000226986 | 1.799000381 | 1.925536307 | pseudogene       | 1  | 211380389 | 211381286 |           |
| ENSG00000226989 | 0.499066092 | 1.16600992  | pseudogene       | 22 | 43249409  | 43249805  |           |
| ENSG00000227001 | 1.799000381 | 2.144285137 | pseudogene       | 1  | 21751118  | 21754460  | NBPF2P    |
| ENSG00000227002 | 0           | 0.390640832 | pseudogene       | 1  | 223831811 | 223832085 | SNRPEP10  |
| ENSG00000227006 | 2.238690726 | 2.579085888 | antisense        | 1  | 230394440 | 230404229 |           |
| ENSG00000227008 | 1.616589159 | 2.242360793 | pseudogene       | X  | 132804999 | 132805414 |           |
| ENSG00000227009 | 0.499066092 | 0           | pseudogene       | 22 | 39551530  | 39551950  | FUNDC2P4  |
| ENSG00000227010 | 0.499066092 | 0           | processed_transc | 1  | 155966114 | 155972355 |           |
| ENSG00000227014 | 2.671945279 | 1.667587519 | antisense        | 7  | 30028216  | 30065276  |           |
| ENSG00000227017 | 0.869158192 | 0.390640832 | lincRNA          | 7  | 30216003  | 30218630  |           |
| ENSG00000227035 | 0           | 0.390640832 | pseudogene       | 7  | 63567200  | 63567950  |           |
| ENSG00000227036 | 6.749949642 | 6.811590016 | processed_transc | 17 | 70380443  | 70588943  |           |
| ENSG00000227038 | 2.847891871 | 1.667587519 | pseudogene       | 7  | 75719749  | 75738097  |           |
| ENSG00000227039 | 3.989024711 | 3.781359661 | processed_transc | 21 | 46340966  | 46349593  |           |
| ENSG00000227045 | 0           | 0.390640832 | antisense        | 1  | 151673502 | 151680862 |           |
| ENSG00000227047 | 0.499066092 | 0           | lincRNA          | 2  | 20699331  | 20701071  |           |
| ENSG00000227051 | 0           | 0.697730409 | protein_coding   | 14 | 96505661  | 96506417  | C14orf132 |
| ENSG00000227053 | 1.16343121  | 0.697730409 | antisense        | 7  | 100657601 | 100660889 |           |
| ENSG00000227056 | 0           | 0.697730409 | pseudogene       | 1  | 119761932 | 119762719 |           |
| ENSG00000227057 | 10.07366267 | 10.253797   | protein_coding   | 6  | 33246885  | 33257304  | WDR46     |
| ENSG00000227060 | 2.762599152 | 2.501982735 | processed_transc | X  | 133684003 | 133693953 |           |
| ENSG00000227066 | 4.734682531 | 1.518964905 | antisense        | 1  | 20480831  | 20487061  |           |
| ENSG00000227068 | 0           | 0.390640832 | antisense        | 9  | 128329858 | 128335302 |           |
| ENSG00000227070 | 1.960915222 | 1.518964905 | processed_transc | 1  | 51983981  | 52027301  |           |
| ENSG00000227071 | 0.869158192 | 1.16600992  | lincRNA          | 9  | 20683303  | 20684687  |           |
| ENSG00000227073 | 0           | 0.390640832 | pseudogene       | 7  | 135129209 | 135129673 | SDHDP2    |
| ENSG00000227076 | 3.603959378 | 3.64455972  | sense_intronic   | 10 | 129732962 | 129734431 |           |
| ENSG00000227077 | 2.238690726 | 1.802319292 | pseudogene       | 17 | 18476045  | 18476415  |           |
| ENSG00000227078 | 0.499066092 | 1.518964905 | lincRNA          | 17 | 19322348  | 19327670  |           |
| ENSG00000227080 | 0           | 0.390640832 | pseudogene       | 7  | 51456127  | 51456811  |           |
| ENSG00000227081 | 2.10647801  | 2.144285137 | pseudogene       | 12 | 3320775   | 3321096   |           |
| ENSG00000227082 | 1.16343121  | 1.802319292 | processed_transc | 1  | 121138614 | 121204983 |           |
| ENSG00000227083 | 1.16343121  | 0.950786998 | antisense        | X  | 146981696 | 146982977 |           |
| ENSG00000227087 | 0.499066092 | 0           | pseudogene       | 5  | 79627392  | 79628360  | RBMX2P5   |
| ENSG00000227096 | 0           | 0.390640832 | pseudogene       | 10 | 118198980 | 118199556 | HMGB3P8   |
| ENSG00000227097 | 10.09453648 | 10.50507319 | pseudogene       | 11 | 82400571  | 82400944  |           |
| ENSG00000227105 | 0.869158192 | 0.390640832 | pseudogene       | 13 | 111589106 | 111592131 | PARP1P1   |
| ENSG00000227107 | 0           | 0.390640832 | lincRNA          | 2  | 238521620 | 238535168 |           |
| ENSG00000227110 | 1.616589159 | 1.667587519 | processed_transc | 3  | 7994492   | 8653610   |           |
| ENSG00000227113 | 1.616589159 | 1.16600992  | pseudogene       | 7  | 64535401  | 64539158  |           |
| ENSG00000227117 | 3.146112541 | 2.721932731 | processed_transc | 22 | 30404731  | 30476469  |           |
| ENSG00000227118 | 0.499066092 | 0.950786998 | pseudogene       | 4  | 99661893  | 99662382  | BTF3P13   |
| ENSG00000227123 | 0           | 0.390640832 | pseudogene       | 3  | 44979165  | 44979974  |           |
| ENSG00000227124 | 6.887241849 | 6.819555981 | protein_coding   | 3  | 75758794  | 75834734  | ZNF717    |
| ENSG00000227136 | 0           | 0.390640832 | lincRNA          | 10 | 80027085  | 80090352  | C10orf101 |
| ENSG00000227154 | 0.869158192 | 0           | pseudogene       | 6  | 35410821  | 35417643  |           |
| ENSG00000227158 | 0           | 0.390640832 | pseudogene       | 17 | 17325995  | 17327018  |           |
| ENSG00000227160 | 0.499066092 | 0           | pseudogene       | 11 | 32133595  | 32364955  |           |
| ENSG00000227161 | 0           | 0.390640832 | processed_transc | 15 | 59936497  | 59964501  |           |
| ENSG00000227163 | 1.407729925 | 0.950786998 | pseudogene       | 1  | 44553633  | 44553765  |           |

|                 |             |             |                  |    |           |                       |
|-----------------|-------------|-------------|------------------|----|-----------|-----------------------|
| ENSG00000227165 | 0           | 0.390640832 | processed_transc | 10 | 122521324 | 122551437             |
| ENSG00000227173 | 0           | 0.390640832 | pseudogene       | 10 | 66929196  | 66929627 MYL6P3       |
| ENSG00000227176 | 1.960915222 | 0.697730409 | pseudogene       | 2  | 170933734 | 170934804             |
| ENSG00000227182 | 0.499066092 | 0.950786998 | pseudogene       | 7  | 57482534  | 57483429 VN1R28P      |
| ENSG00000227183 | 6.830742851 | 6.729413443 | pseudogene       | X  | 130780647 | 130780899 HDGFP1      |
| ENSG00000227184 | 8.512210607 | 8.454700467 | protein_coding   | 8  | 144939497 | 144952632 EPPK1       |
| ENSG00000227186 | 0           | 0.390640832 | antisense        | 10 | 76783233  | 76784009              |
| ENSG00000227187 | 0.499066092 | 0           | pseudogene       | 2  | 175898506 | 175898920             |
| ENSG00000227189 | 3.393122761 | 3.183544561 | antisense        | 4  | 1145160   | 1147489               |
| ENSG00000227192 | 1.16343121  | 1.353254395 | antisense        | 6  | 143360562 | 143363461             |
| ENSG00000227193 | 0.869158192 | 0.697730409 | lincRNA          | 1  | 120876263 | 120905159             |
| ENSG00000227195 | 5.255381949 | 7.234379288 | processed_transc | 20 | 26167655  | 26189869              |
| ENSG00000227197 | 0           | 0.390640832 | antisense        | 7  | 132515453 | 132534353             |
| ENSG00000227199 | 2.928422289 | 2.851901313 | antisense        | 7  | 116592500 | 116594388 ST7-AS1     |
| ENSG00000227200 | 1.407729925 | 1.667587519 | sense_intronic   | 9  | 127025155 | 127028088             |
| ENSG00000227201 | 3.077135474 | 2.144285137 | pseudogene       | 22 | 30442265  | 30443182 CNN2P1       |
| ENSG00000227203 | 1.16343121  | 0.390640832 | pseudogene       | 8  | 11647514  | 11647897 SUB1P1       |
| ENSG00000227207 | 0           | 0.390640832 | pseudogene       | 1  | 72767155  | 72767506              |
| ENSG00000227208 | 0.869158192 | 0.390640832 | pseudogene       | 13 | 114451484 | 114454062             |
| ENSG00000227210 | 0.869158192 | 0.950786998 | antisense        | 2  | 20189978  | 20203971              |
| ENSG00000227212 | 0.869158192 | 0.390640832 | pseudogene       | 1  | 148574653 | 148575051 PFN1P7      |
| ENSG00000227213 | 0.499066092 | 0           | antisense        | 13 | 24826887  | 24828577 SPATA13-AS1  |
| ENSG00000227214 | 1.960915222 | 3.081239798 | antisense        | 6  | 28953980  | 28955261 HCG15        |
| ENSG00000227215 | 0.499066092 | 0           | antisense        | 6  | 83642320  | 83648396              |
| ENSG00000227216 | 0.499066092 | 1.667587519 | pseudogene       | 1  | 146059926 | 146060344 PFN1P5      |
| ENSG00000227218 | 0.869158192 | 1.518964905 | antisense        | 9  | 130702574 | 130703231             |
| ENSG00000227220 | 0.869158192 | 0.390640832 | antisense        | 6  | 132272086 | 132398533             |
| ENSG00000227225 | 0           | 0.390640832 | pseudogene       | 17 | 19505572  | 19506521 MTND1P14     |
| ENSG00000227227 | 0.499066092 | 0           | antisense        | 2  | 187506066 | 187560014             |
| ENSG00000227230 | 1.799000381 | 0.950786998 | antisense        | 1  | 243299200 | 243303890             |
| ENSG00000227232 | 2.35979773  | 3.027231696 | pseudogene       | 1  | 14363     | 29806 WASH7P          |
| ENSG00000227233 | 2.238690726 | 1.667587519 | pseudogene       | 7  | 51449981  | 51452357              |
| ENSG00000227237 | 0.499066092 | 0.390640832 | antisense        | 1  | 249153363 | 249158995             |
| ENSG00000227242 | 1.799000381 | 1.667587519 | pseudogene       | 1  | 146490895 | 146596107             |
| ENSG00000227245 | 0           | 0.950786998 | lincRNA          | 3  | 43128971  | 43129560              |
| ENSG00000227252 | 3.077135474 | 2.788380093 | processed_transc | 2  | 237968077 | 237994460             |
| ENSG00000227253 | 0           | 0.390640832 | antisense        | 10 | 32555217  | 32558039              |
| ENSG00000227256 | 1.16343121  | 1.802319292 | antisense        | 21 | 33650174  | 33653299 MIS18A-AS1   |
| ENSG00000227258 | 0           | 1.518964905 | antisense        | 13 | 44716682  | 44813010 C13orf44-AS1 |
| ENSG00000227262 | 1.407729925 | 2.420525079 | pseudogene       | 6  | 29892500  | 29894992              |
| ENSG00000227267 | 0           | 0.390640832 | pseudogene       | 3  | 135774026 | 135774606             |
| ENSG00000227268 | 0.499066092 | 0           | protein_coding   | 10 | 89621708  | 89622244 KLLN         |
| ENSG00000227279 | 0.869158192 | 1.667587519 | antisense        | 18 | 25534483  | 25543651              |
| ENSG00000227280 | 1.16343121  | 0.697730409 | antisense        | 1  | 145373054 | 145375554             |
| ENSG00000227285 | 2.238690726 | 2.912743273 | antisense        | X  | 119055224 | 119056803             |
| ENSG00000227288 | 0.499066092 | 0           | pseudogene       | 1  | 81967455  | 81969147              |
| ENSG00000227295 | 0.499066092 | 0.697730409 | pseudogene       | 1  | 158145640 | 158147545 ELL2P1      |
| ENSG00000227297 | 0.499066092 | 0.390640832 | lincRNA          | 20 | 56174751  | 56176256              |
| ENSG00000227300 | 2.671945279 | 0.697730409 | pseudogene       | 17 | 16733313  | 16736147 KRT16P2      |
| ENSG00000227301 | 0.499066092 | 0.390640832 | lincRNA          | 9  | 33719688  | 33722553              |
| ENSG00000227307 | 0           | 0.390640832 | lincRNA          | 10 | 122685059 | 122740213             |
| ENSG00000227308 | 0.869158192 | 0.390640832 | processed_transc | 2  | 220551709 | 220579408             |
| ENSG00000227313 | 0           | 0.697730409 | lincRNA          | 10 | 36185802  | 36187891              |
| ENSG00000227321 | 1.799000381 | 1.16600992  | pseudogene       | 9  | 94873147  | 94874179 MTND4P15     |
| ENSG00000227329 | 1.799000381 | 2.334191469 | pseudogene       | X  | 53193574  | 53193739              |
| ENSG00000227331 | 1.407729925 | 0.697730409 | pseudogene       | 2  | 159404937 | 159405736             |
| ENSG00000227332 | 0           | 0.697730409 | lincRNA          | 13 | 19433967  | 19434882 LINC00419    |
| ENSG00000227337 | 0.499066092 | 1.353254395 | pseudogene       | 3  | 32827138  | 32827608              |
| ENSG00000227339 | 0.499066092 | 0.390640832 | pseudogene       | 3  | 31494324  | 31497386 THRAP3P1     |
| ENSG00000227344 | 0.499066092 | 0           | pseudogene       | 7  | 53255081  | 53256631              |
| ENSG00000227345 | 7.127924785 | 7.029859489 | protein_coding   | 10 | 51026325  | 51130715 PARG         |
| ENSG00000227347 | 1.799000381 | 0.697730409 | pseudogene       | 2  | 136956684 | 136958073 HNRNPKP2    |
| ENSG00000227348 | 1.16343121  | 0           | pseudogene       | 2  | 202077006 | 202077804 MTND5P25    |

|                 |             |             |                    |    |           |           |            |
|-----------------|-------------|-------------|--------------------|----|-----------|-----------|------------|
| ENSG00000227354 | 3.603959378 | 3.532712221 | processed_transc   | 13 | 79980444  | 79997090  | RBM26-AS1  |
| ENSG00000227355 | 1.616589159 | 1.16600992  | antisense          | 9  | 124137519 | 124214455 |            |
| ENSG00000227356 | 0.499066092 | 0           | antisense          | 10 | 99588235  | 99609535  |            |
| ENSG00000227359 | 3.146112541 | 2.912743273 | lincRNA            | 2  | 114435279 | 114461655 |            |
| ENSG00000227361 | 0.499066092 | 0           | pseudogene         | 2  | 62030278  | 62030523  |            |
| ENSG00000227363 | 0           | 1.16600992  | lincRNA            | 2  | 3891774   | 3895001   |            |
| ENSG00000227370 | 2.35979773  | 2.721932731 | pseudogene         | 22 | 42528550  | 42529005  |            |
| ENSG00000227372 | 7.409722215 | 7.88892877  | processed_transc   | 1  | 3652548   | 3663900   | TP73-AS1   |
| ENSG00000227373 | 0.499066092 | 0.697730409 | lincRNA            | 1  | 174084438 | 174129142 |            |
| ENSG00000227374 | 0           | 1.16600992  | lincRNA            | 10 | 131567108 | 131567699 |            |
| ENSG00000227375 | 3.393122761 | 1.518964905 | processed_transc   | 3  | 197025123 | 197030618 |            |
| ENSG00000227376 | 3.393122761 | 3.368666104 | pseudogene         | 11 | 77445520  | 77446071  | FTH1P16    |
| ENSG00000227379 | 0           | 1.353254395 | pseudogene         | 20 | 25348911  | 25349402  | PPIAP2     |
| ENSG00000227382 | 0.869158192 | 0.697730409 | pseudogene         | 10 | 74959584  | 74960983  |            |
| ENSG00000227383 | 0           | 0.390640832 | pseudogene         | 9  | 34191553  | 34191879  |            |
| ENSG00000227388 | 0           | 0.697730409 | antisense          | 9  | 35786643  | 35790429  |            |
| ENSG00000227392 | 0           | 0.697730409 | protein_coding     | 19 | 35549963  | 35597208  |            |
| ENSG00000227395 | 0.499066092 | 0           | pseudogene         | 10 | 45301891  | 45303671  | EIF2AP4    |
| ENSG00000227397 | 1.407729925 | 0           | pseudogene         | 7  | 63250287  | 63250476  |            |
| ENSG00000227398 | 2.847891871 | 4.075511708 | processed_transc   | 3  | 47205987  | 47285546  |            |
| ENSG00000227401 | 1.960915222 | 0.950786998 | pseudogene         | 20 | 34176246  | 34176529  | RPL37P1    |
| ENSG00000227403 | 5.239686603 | 5.317302248 | processed_transc   | 2  | 162101250 | 162105561 |            |
| ENSG00000227404 | 0           | 0.697730409 | pseudogene         | 7  | 38694805  | 38696213  | KRT8P20    |
| ENSG00000227407 | 1.16343121  | 1.16600992  | antisense          | 19 | 54941832  | 54945878  |            |
| ENSG00000227409 | 0           | 0.390640832 | antisense          | 1  | 35824423  | 35831678  | ZMYM4-AS1  |
| ENSG00000227410 | 1.616589159 | 1.518964905 | processed_transc   | 9  | 71736209  | 71737148  |            |
| ENSG00000227413 | 1.799000381 | 0.950786998 | pseudogene         | 22 | 40829140  | 40829645  |            |
| ENSG00000227415 | 0           | 0.390640832 | processed_transc   | 1  | 152346430 | 152417932 |            |
| ENSG00000227417 | 1.799000381 | 1.667587519 | pseudogene         | 1  | 203774746 | 203775391 |            |
| ENSG00000227431 | 0           | 0.950786998 | antisense          | 20 | 47657000  | 47662581  |            |
| ENSG00000227432 | 0           | 0.950786998 | antisense          | 2  | 220346795 | 220381599 |            |
| ENSG00000227436 | 0.869158192 | 1.16600992  | pseudogene         | 7  | 23658952  | 23662445  |            |
| ENSG00000227440 | 2.238690726 | 1.925536307 | pseudogene         | 3  | 172546526 | 172546966 | ATP5G1P4   |
| ENSG00000227449 | 0           | 1.16600992  | pseudogene         | 9  | 46687462  | 46746500  |            |
| ENSG00000227450 | 2.10647801  | 2.721932731 | protein_coding     | 17 | 36905613  | 36906969  |            |
| ENSG00000227452 | 0           | 0.390640832 | sense_intronic     | 9  | 128047877 | 128048998 |            |
| ENSG00000227453 | 0           | 0.390640832 | pseudogene         | 1  | 55002469  | 55003431  |            |
| ENSG00000227456 | 1.616589159 | 2.039052734 | lincRNA            | 21 | 35552978  | 35562220  | LINC00310  |
| ENSG00000227467 | 0           | 0.390640832 | processed_transc   | 11 | 72281704  | 72284273  |            |
| ENSG00000227470 | 0.869158192 | 0.950786998 | pseudogene         | 2  | 109494764 | 109494916 |            |
| ENSG00000227471 | 3.911897206 | 2.144285137 | protein_coding     | 7  | 134233888 | 134264592 | AKR1B15    |
| ENSG00000227473 | 2.57521082  | 2.501982735 | pseudogene         | 8  | 145196117 | 145198567 | TSSK5P1    |
| ENSG00000227474 | 0           | 0.697730409 | pseudogene         | 10 | 13633460  | 13634323  |            |
| ENSG00000227477 | 1.799000381 | 1.925536307 | processed_transc   | 20 | 43592435  | 43595043  |            |
| ENSG00000227479 | 0           | 0.390640832 | lincRNA            | 2  | 241166977 | 241195452 |            |
| ENSG00000227482 | 1.407729925 | 1.353254395 | lincRNA            | 9  | 116413236 | 116445135 |            |
| ENSG00000227484 | 0.499066092 | 0           | antisense          | 22 | 50753060  | 50754437  |            |
| ENSG00000227486 | 1.407729925 | 0.950786998 | processed_transc X | 9  | 55934556  | 56041606  |            |
| ENSG00000227490 | 0           | 0.390640832 | pseudogene         | 9  | 46169973  | 46170336  |            |
| ENSG00000227492 | 1.16343121  | 1.353254395 | antisense          | 10 | 101989424 | 101993757 |            |
| ENSG00000227495 | 2.35979773  | 2.851901313 | antisense          | 17 | 4922509   | 4923388   |            |
| ENSG00000227496 | 4.464551814 | 4.693656882 | antisense          | 1  | 225888306 | 225939945 |            |
| ENSG00000227499 | 0.499066092 | 0           | pseudogene         | 7  | 55945605  | 55945857  |            |
| ENSG00000227500 | 10.39432652 | 10.44035639 | protein_coding     | 19 | 1905371   | 1926012   | SCAMP4     |
| ENSG00000227502 | 0           | 0.697730409 | processed_transc   | 6  | 114191162 | 114191899 |            |
| ENSG00000227505 | 0.499066092 | 0           | pseudogene X       |    | 146882523 | 146882820 |            |
| ENSG00000227507 | 8.735671237 | 8.677053487 | protein_coding     | 6  | 31548302  | 31550299  | LTB        |
| ENSG00000227512 | 2.10647801  | 2.039052734 | antisense          | 9  | 139437333 | 139438287 |            |
| ENSG00000227516 | 0.499066092 | 0           | lincRNA            | 6  | 41836360  | 41837469  |            |
| ENSG00000227518 | 4.689181911 | 4.888000647 | antisense          | 9  | 27657     | 30891     | MIR1302-10 |
| ENSG00000227523 | 0.869158192 | 0.697730409 | pseudogene         | 3  | 27503997  | 27504307  |            |
| ENSG00000227525 | 1.616589159 | 0.390640832 | pseudogene         | 12 | 19241974  | 19242825  |            |
| ENSG00000227527 | 0.499066092 | 1.16600992  | processed_transc   | 1  | 42801057  | 42804047  |            |

|                 |             |             |                  |    |           |                       |
|-----------------|-------------|-------------|------------------|----|-----------|-----------------------|
| ENSG00000227533 | 3.077135474 | 3.493416095 | processed_transc | 1  | 43424720  | 43449029              |
| ENSG00000227536 | 2.57521082  | 2.721932731 | pseudogene       | X  | 70263064  | 70265320              |
| ENSG00000227539 | 0.499066092 | 0.697730409 | sense_intronic   | 10 | 76185995  | 76186461              |
| ENSG00000227540 | 3.744048221 | 3.748356452 | processed_transc | 10 | 75012549  | 75014107              |
| ENSG00000227541 | 0.499066092 | 0.390640832 | pseudogene       | X  | 119335910 | 119336597             |
| ENSG00000227542 | 1.799000381 | 1.925536307 | lincRNA          | 2  | 192093891 | 192110898             |
| ENSG00000227543 | 4.409500985 | 3.453019579 | processed_transc | 17 | 26925808  | 26944393 SPAG5-AS1    |
| ENSG00000227544 | 0.499066092 | 0.697730409 | lincRNA          | 7  | 35756055  | 35774497              |
| ENSG00000227554 | 0           | 0.390640832 | antisense        | 1  | 183723553 | 183724072             |
| ENSG00000227558 | 1.799000381 | 0.390640832 | pseudogene       | 9  | 69112841  | 69147854 PGM5P2       |
| ENSG00000227560 | 0.499066092 | 0           | pseudogene       | 10 | 114747235 | 114747624             |
| ENSG00000227568 | 0.869158192 | 0           | pseudogene       | 13 | 19381419  | 19382158 SNX18P26     |
| ENSG00000227582 | 1.16343121  | 2.144285137 | pseudogene       | 9  | 66516697  | 66517831              |
| ENSG00000227583 | 0.869158192 | 0.390640832 | pseudogene       | 10 | 70434113  | 70434857              |
| ENSG00000227586 | 0.869158192 | 1.802319292 | pseudogene       | 10 | 124931048 | 124931395             |
| ENSG00000227589 | 0.499066092 | 0.390640832 | antisense        | 1  | 3575502   | 3585336               |
| ENSG00000227591 | 1.960915222 | 1.353254395 | antisense        | 1  | 209834709 | 209897470             |
| ENSG00000227593 | 0.499066092 | 0           | pseudogene       | 11 | 93788189  | 93789138              |
| ENSG00000227598 | 1.616589159 | 1.802319292 | antisense        | 6  | 167383114 | 167412553             |
| ENSG00000227603 | 0.499066092 | 0.950786998 | antisense        | 9  | 96197614  | 96199403              |
| ENSG00000227606 | 0.499066092 | 1.518964905 | antisense        | 19 | 43657431  | 43665014              |
| ENSG00000227608 | 0.499066092 | 0.697730409 | antisense        | 13 | 114110944 | 114116670 DCUN1D2-AS1 |
| ENSG00000227609 | 0           | 0.950786998 | pseudogene       | 6  | 29545236  | 29545525 TMEM183AP1   |
| ENSG00000227612 | 0.499066092 | 0.390640832 | antisense        | 1  | 14104760  | 14105625              |
| ENSG00000227615 | 4.903563137 | 5.536128679 | pseudogene       | 11 | 74456761  | 74457159              |
| ENSG00000227619 | 1.799000381 | 2.039052734 | antisense        | 9  | 132337688 | 132346835             |
| ENSG00000227620 | 1.960915222 | 0           | pseudogene       | 11 | 67552733  | 67559809              |
| ENSG00000227621 | 1.16343121  | 0.390640832 | pseudogene       | 1  | 224044281 | 224045089 PHBP11      |
| ENSG00000227627 | 0.499066092 | 0.390640832 | antisense        | 6  | 153304885 | 153310358             |
| ENSG00000227630 | 1.960915222 | 2.420525079 | processed_transc | 1  | 234861148 | 234867390             |
| ENSG00000227632 | 1.799000381 | 0           | pseudogene       | 2  | 130959885 | 130970201             |
| ENSG00000227637 | 0.499066092 | 0.950786998 | antisense        | 1  | 29479001  | 29479503              |
| ENSG00000227638 | 1.407729925 | 1.16600992  | pseudogene       | 9  | 91025798  | 91026363 HNRNPA1P14   |
| ENSG00000227640 | 0.869158192 | 0           | processed_transc | 13 | 95364970  | 95366749 SOX21-AS1    |
| ENSG00000227645 | 0           | 0.390640832 | pseudogene       | X  | 78018723  | 78019382 RPL7P54      |
| ENSG00000227646 | 0           | 0.390640832 | processed_transc | 7  | 89511667  | 89840949 STEAP2-AS1   |
| ENSG00000227649 | 0.499066092 | 0           | pseudogene       | X  | 102061092 | 102061574             |
| ENSG00000227651 | 0           | 0.697730409 | pseudogene       | 9  | 33574356  | 33574633              |
| ENSG00000227666 | 0.499066092 | 1.16600992  | pseudogene       | 9  | 96800312  | 96800627              |
| ENSG00000227671 | 7.44778847  | 8.046558348 | pseudogene       | 1  | 247353153 | 247372795             |
| ENSG00000227673 | 0.869158192 | 0           | antisense        | 1  | 155679889 | 155680354             |
| ENSG00000227674 | 1.16343121  | 0.390640832 | processed_transc | 13 | 64560504  | 64650144 LINC00355    |
| ENSG00000227682 | 0.499066092 | 0.697730409 | pseudogene       | 2  | 156126145 | 156126399 ATP5A1P2    |
| ENSG00000227684 | 0           | 1.16600992  | pseudogene       | 1  | 17076728  | 17077459              |
| ENSG00000227688 | 0           | 0.390640832 | pseudogene       | 20 | 35248806  | 35249826 HNRNPA3P2    |
| ENSG00000227692 | 0           | 0.950786998 | pseudogene       | 2  | 187229325 | 187229855             |
| ENSG00000227693 | 1.407729925 | 0.950786998 | pseudogene       | 20 | 21482033  | 21482606 GSTM3P1      |
| ENSG00000227694 | 2.471521042 | 2.242360793 | pseudogene       | 17 | 59147232  | 59147702              |
| ENSG00000227695 | 0           | 0.697730409 | antisense        | 10 | 101686767 | 101718138 DNMBP-AS1   |
| ENSG00000227698 | 1.616589159 | 1.802319292 | sense_intronic   | 21 | 43294865  | 43297722              |
| ENSG00000227700 | 0.499066092 | 0.390640832 | pseudogene       | 1  | 147718440 | 147718956             |
| ENSG00000227702 | 0.869158192 | 0           | lincRNA          | 21 | 43099341  | 43117496 LINC00111    |
| ENSG00000227705 | 0           | 0.390640832 | antisense        | 20 | 51812768  | 51825244              |
| ENSG00000227707 | 0.499066092 | 0           | pseudogene       | 3  | 33813455  | 33813787 SDAD1P3      |
| ENSG00000227709 | 0.499066092 | 0           | pseudogene       | 3  | 155875691 | 155894700             |
| ENSG00000227711 | 0           | 0.697730409 | lincRNA          | 1  | 227698297 | 227708178             |
| ENSG00000227714 | 0           | 0.697730409 | pseudogene       | 13 | 96346237  | 96346749 MTND6P18     |
| ENSG00000227719 | 1.16343121  | 0.697730409 | antisense        | 7  | 8153655   | 8156191               |
| ENSG00000227725 | 0           | 0.390640832 | pseudogene       | 4  | 68904262  | 68905368 GCOM2        |
| ENSG00000227729 | 1.407729925 | 0.697730409 | protein_coding   | 14 | 104406763 | 104408645 TDRD9-AS1   |
| ENSG00000227733 | 3.004694206 | 0.950786998 | sense_intronic   | 1  | 146093234 | 146159102             |
| ENSG00000227736 | 0.499066092 | 0           | pseudogene       | 2  | 202417582 | 202418335             |
| ENSG00000227740 | 0           | 0.390640832 | lincRNA          | 1  | 175873898 | 175889649             |

|                 |             |             |                  |    |           |                     |
|-----------------|-------------|-------------|------------------|----|-----------|---------------------|
| ENSG00000227741 | 3.554067925 | 3.532712221 | processed_transc | 1  | 160171989 | 160178659           |
| ENSG00000227742 | 1.16343121  | 0.950786998 | pseudogene       | 1  | 52027538  | 52060569 CALR4P     |
| ENSG00000227744 | 0           | 0.390640832 | lincRNA          | 2  | 239840998 | 239847965           |
| ENSG00000227745 | 0.869158192 | 0           | pseudogene       | 2  | 132890429 | 132897002           |
| ENSG00000227747 | 0.499066092 | 0           | pseudogene       | 1  | 198918145 | 198918934           |
| ENSG00000227758 | 1.16343121  | 0.390640832 | pseudogene       | 6  | 29716066  | 29716290 HCG9P5     |
| ENSG00000227762 | 1.16343121  | 0.697730409 | pseudogene       | 5  | 98868324  | 98870346 GUSBP8     |
| ENSG00000227764 | 1.616589159 | 0.950786998 | processed_transc | 1  | 211813037 | 211827923           |
| ENSG00000227765 | 0.499066092 | 0.697730409 | pseudogene       | 4  | 185220282 | 185220800           |
| ENSG00000227766 | 0.869158192 | 1.518964905 | pseudogene       | 6  | 29909852  | 29910844 HCG4P5     |
| ENSG00000227770 | 0.499066092 | 0           | pseudogene       | 2  | 38458710  | 38459459            |
| ENSG00000227775 | 4.75690578  | 4.990346085 | processed_transc | 1  | 1656054   | 1663343             |
| ENSG00000227779 | 0           | 0.390640832 | pseudogene X     |    | 140474987 | 140475271           |
| ENSG00000227781 | 0.499066092 | 0           | processed_transc | 10 | 48952569  | 48980342            |
| ENSG00000227782 | 1.407729925 | 0.950786998 | protein_coding   | 17 | 15943505  | 15943994            |
| ENSG00000227788 | 1.16343121  | 0.950786998 | pseudogene       | 2  | 120969303 | 120970438           |
| ENSG00000227791 | 2.847891871 | 3.279072565 | pseudogene       | 2  | 64892741  | 64893199            |
| ENSG00000227799 | 2.847891871 | 2.721932731 | pseudogene       | 2  | 55451416  | 55453044            |
| ENSG00000227811 | 0           | 0.390640832 | processed_transc | 1  | 112282463 | 112290420           |
| ENSG00000227813 | 0           | 0.390640832 | pseudogene       | 22 | 32286330  | 32287420            |
| ENSG00000227815 | 0.869158192 | 1.16600992  | pseudogene       | 1  | 176241619 | 176242564           |
| ENSG00000227821 | 0.499066092 | 0.697730409 | pseudogene       | 10 | 6867825   | 6868186             |
| ENSG00000227825 | 1.407729925 | 1.802319292 | pseudogene       | 12 | 98847613  | 98850923 SLC9A7P1   |
| ENSG00000227827 | 2.35979773  | 2.579085888 | pseudogene       | 16 | 16450081  | 16471364            |
| ENSG00000227834 | 0.499066092 | 0           | pseudogene       | 11 | 67419047  | 67420875            |
| ENSG00000227844 | 3.077135474 | 5.638744877 | antisense        | 6  | 136364990 | 136393965           |
| ENSG00000227845 | 0.499066092 | 0.697730409 | pseudogene       | 9  | 128134613 | 128134971           |
| ENSG00000227848 | 1.407729925 | 2.039052734 | antisense        | 13 | 48575525  | 48576688 SUCLA2-AS1 |
| ENSG00000227850 | 0           | 0.390640832 | pseudogene       | 1  | 106240661 | 106240840 SEPT2P1   |
| ENSG00000227852 | 0.499066092 | 0.390640832 | pseudogene       | 9  | 35592783  | 35592948            |
| ENSG00000227854 | 0           | 0.390640832 | pseudogene       | 1  | 239216048 | 239216203           |
| ENSG00000227855 | 5.389447744 | 4.65855978  | pseudogene       | 7  | 29689843  | 29782210            |
| ENSG00000227857 | 0.869158192 | 0.950786998 | antisense        | 1  | 46599043  | 46604753            |
| ENSG00000227864 | 0           | 0.390640832 | pseudogene X     |    | 118320405 | 118320792           |
| ENSG00000227868 | 1.16343121  | 0.390640832 | protein_coding   | 1  | 23337327  | 23342343            |
| ENSG00000227874 | 0.869158192 | 0.697730409 | pseudogene       | 21 | 15038189  | 15039867 GRAMD4P1   |
| ENSG00000227877 | 0           | 0.390640832 | lincRNA          | 10 | 61496753  | 61513203            |
| ENSG00000227879 | 0           | 0.390640832 | pseudogene       | 13 | 19775777  | 19801572 PSPC1P1    |
| ENSG00000227881 | 0           | 0.697730409 | pseudogene X     |    | 114899215 | 114900453 ASS1P5    |
| ENSG00000227885 | 1.16343121  | 1.925536307 | lincRNA          | 6  | 53605547  | 53611820            |
| ENSG00000227887 | 0           | 0.390640832 | pseudogene       | 1  | 208870714 | 208871043           |
| ENSG00000227895 | 3.502389126 | 3.133298822 | antisense        | 22 | 35318599  | 35468882            |
| ENSG00000227896 | 1.616589159 | 2.851901313 | antisense        | 10 | 88281702  | 88282443            |
| ENSG00000227906 | 0           | 0.390640832 | processed_transc | 20 | 10006264  | 10349451            |
| ENSG00000227908 | 3.448790144 | 2.851901313 | protein_coding   | 5  | 55290995  | 55299477            |
| ENSG00000227910 | 2.238690726 | 1.802319292 | pseudogene       | 7  | 63385165  | 63386684            |
| ENSG00000227921 | 1.960915222 | 1.667587519 | protein_coding   | 9  | 40028620  | 40032417            |
| ENSG00000227925 | 0           | 0.390640832 | lincRNA          | 1  | 222001008 | 222014008           |
| ENSG00000227934 | 0.869158192 | 0           | pseudogene       | 1  | 231157357 | 231157929           |
| ENSG00000227938 | 1.16343121  | 1.518964905 | lincRNA          | 2  | 28671034  | 28673051            |
| ENSG00000227939 | 1.960915222 | 1.802319292 | pseudogene       | 6  | 31248094  | 31249296 RPL3P2     |
| ENSG00000227941 | 0.499066092 | 0.950786998 | pseudogene       | 1  | 162511122 | 162511418 UQCRBP2   |
| ENSG00000227942 | 0.499066092 | 0           | pseudogene X     |    | 64770778  | 64772301 FRMD8P1    |
| ENSG00000227945 | 0           | 0.390640832 | antisense        | 6  | 128349031 | 128406393           |
| ENSG00000227946 | 2.57521082  | 2.039052734 | lincRNA          | 2  | 206949329 | 206951288           |
| ENSG00000227948 | 0           | 0.390640832 | pseudogene       | 7  | 111051375 | 111051939           |
| ENSG00000227950 | 0           | 0.950786998 | pseudogene       | 1  | 6894393   | 6894678             |
| ENSG00000227953 | 3.830412367 | 4.961837817 | processed_transc | 1  | 246939315 | 246955687           |
| ENSG00000227954 | 0           | 0.390640832 | processed_transc | 6  | 133823390 | 133832866           |
| ENSG00000227959 | 3.554067925 | 3.027231696 | antisense        | 1  | 16481706  | 16483824            |
| ENSG00000227962 | 0.499066092 | 1.518964905 | pseudogene       | 1  | 235500121 | 235500402           |
| ENSG00000227963 | 1.799000381 | 1.667587519 | processed_transc | 1  | 110828997 | 110881793           |
| ENSG00000227968 | 0.499066092 | 0           | pseudogene       | 7  | 108634088 | 108635086           |

|                 |             |             |                  |    |           |                     |
|-----------------|-------------|-------------|------------------|----|-----------|---------------------|
| ENSG00000227971 | 0.499066092 | 0           | pseudogene       | 3  | 189363116 | 189363255           |
| ENSG00000227972 | 0.499066092 | 0.697730409 | pseudogene       | 10 | 54170895  | 54173252 PRKRIRP3   |
| ENSG00000227973 | 0.499066092 | 1.353254395 | pseudogene       | 15 | 44168047  | 44168442            |
| ENSG00000227986 | 3.603959378 | 3.411459265 | pseudogene       | 7  | 63815456  | 63816577 TRIM60P18  |
| ENSG00000227990 | 0.499066092 | 0.697730409 | antisense        | 7  | 1881252   | 1881812             |
| ENSG00000227992 | 3.211941663 | 2.788380093 | pseudogene       | 2  | 111961541 | 111963792           |
| ENSG00000227999 | 2.762599152 | 2.501982735 | pseudogene       | 21 | 45893606  | 45894980 MTND5P1    |
| ENSG00000228000 | 0           | 2.579085888 | pseudogene       | 17 | 18215218  | 18215965            |
| ENSG00000228002 | 1.960915222 | 0.950786998 | pseudogene       | 13 | 77559003  | 77564724 DHX9P1     |
| ENSG00000228005 | 0.499066092 | 0           | antisense        | 7  | 50181136  | 50182419            |
| ENSG00000228006 | 5.40360309  | 5.271576845 | protein_coding   | 19 | 58198294  | 58202072            |
| ENSG00000228007 | 1.407729925 | 1.667587519 | pseudogene       | 17 | 73334908  | 73335228            |
| ENSG00000228008 | 1.799000381 | 0.950786998 | antisense        | 3  | 49941278  | 49954370            |
| ENSG00000228010 | 1.799000381 | 2.039052734 | processed_transc | 7  | 6703605   | 6748532             |
| ENSG00000228011 | 0.499066092 | 1.518964905 | lincRNA          | 13 | 78236635  | 78237275 LINC00413  |
| ENSG00000228013 | 0.499066092 | 0           | processed_transc | 1  | 154374804 | 154379040           |
| ENSG00000228014 | 0           | 0.390640832 | pseudogene       | 7  | 63929563  | 63931031            |
| ENSG00000228016 | 0           | 1.353254395 | processed_transc | 2  | 173541869 | 173600934           |
| ENSG00000228019 | 1.407729925 | 0.950786998 | pseudogene       | 7  | 66772592  | 66773343            |
| ENSG00000228021 | 0           | 0.697730409 | antisense        | 10 | 127371812 | 127398246           |
| ENSG00000228022 | 1.407729925 | 2.242360793 | lincRNA          | 6  | 30734602  | 30760027 HCG20      |
| ENSG00000228028 | 1.960915222 | 1.802319292 | antisense        | 3  | 195977420 | 195978525           |
| ENSG00000228032 | 0           | 0.697730409 | protein_coding   | 14 | 104710541 | 104712473 C14orf144 |
| ENSG00000228033 | 0.499066092 | 1.353254395 | lincRNA          | 2  | 52949815  | 53137158            |
| ENSG00000228037 | 0.499066092 | 0.390640832 | antisense        | 1  | 2512999   | 2515972             |
| ENSG00000228038 | 1.616589159 | 1.353254395 | pseudogene       | 9  | 99855976  | 99856920 VN1R51P    |
| ENSG00000228040 | 0           | 0.390640832 | pseudogene       | 1  | 113433389 | 113433544           |
| ENSG00000228043 | 2.57521082  | 2.334191469 | processed_transc | 2  | 139175854 | 139259268           |
| ENSG00000228044 | 1.407729925 | 0           | processed_transc | 1  | 234782035 | 234818922           |
| ENSG00000228046 | 0.869158192 | 0           | pseudogene       | 9  | 85042166  | 85042940            |
| ENSG00000228049 | 0.499066092 | 0           | protein_coding   | 7  | 102178366 | 102312182 POLR2J2   |
| ENSG00000228056 | 0.869158192 | 0.697730409 | pseudogene       | 1  | 64308862  | 64309356 CFL1P3     |
| ENSG00000228057 | 1.16343121  | 1.518964905 | pseudogene       | 1  | 98011257  | 98012514 SEC63P1    |
| ENSG00000228060 | 1.16343121  | 1.925536307 | antisense        | 1  | 40030832  | 40038875            |
| ENSG00000228061 | 0           | 0.390640832 | processed_transc | 11 | 31658875  | 31789501            |
| ENSG00000228063 | 1.616589159 | 0           | processed_transc | 1  | 219259944 | 219347303           |
| ENSG00000228065 | 2.57521082  | 3.64455972  | lincRNA          | 10 | 67345446  | 67441220            |
| ENSG00000228069 | 1.616589159 | 1.353254395 | pseudogene       | 9  | 94871295  | 94872377            |
| ENSG00000228071 | 1.407729925 | 1.353254395 | pseudogene       | 16 | 18026577  | 18027132 RPL7P47    |
| ENSG00000228072 | 0           | 0.390640832 | antisense        | 9  | 33512957  | 33514771            |
| ENSG00000228076 | 1.16343121  | 0.390640832 | pseudogene       | 1  | 109309468 | 109310206           |
| ENSG00000228079 | 0           | 0.390640832 | lincRNA          | 2  | 64313484  | 64315380            |
| ENSG00000228084 | 1.16343121  | 1.802319292 | antisense        | 1  | 100433939 | 100435420           |
| ENSG00000228086 | 0           | 0.390640832 | antisense        | 1  | 100927955 | 100951553           |
| ENSG00000228091 | 0.499066092 | 0           | antisense        | 10 | 103880410 | 103881139           |
| ENSG00000228106 | 4.352265886 | 5.466810074 | processed_transc | 1  | 222988364 | 223010726           |
| ENSG00000228107 | 0.869158192 | 0.697730409 | processed_transc | 21 | 37732928  | 37734338            |
| ENSG00000228108 | 0           | 0.390640832 | antisense        | 2  | 54743185  | 54767834            |
| ENSG00000228109 | 5.417620896 | 5.271576845 | antisense        | 3  | 196726331 | 196731615 MFI2-AS1  |
| ENSG00000228110 | 1.16343121  | 0.390640832 | pseudogene       | 1  | 210438984 | 210440587 ST13P19   |
| ENSG00000228112 | 0           | 0.390640832 | pseudogene       | 3  | 33768742  | 33769096            |
| ENSG00000228120 | 1.799000381 | 3.133298822 | protein_coding   | 21 | 44579176  | 44582387            |
| ENSG00000228121 | 1.16343121  | 0.697730409 | pseudogene       | 1  | 59465348  | 59466166 PHBP3      |
| ENSG00000228124 | 0           | 0.390640832 | antisense        | 6  | 90383188  | 90385502            |
| ENSG00000228125 | 0           | 0.390640832 | pseudogene       | X  | 67352710  | 67353278            |
| ENSG00000228126 | 1.16343121  | 1.802319292 | lincRNA          | 1  | 150488233 | 150490508           |
| ENSG00000228133 | 1.407729925 | 0.950786998 | antisense        | 17 | 1921177   | 1924000             |
| ENSG00000228135 | 0.869158192 | 1.353254395 | antisense        | 2  | 219765533 | 219795358           |
| ENSG00000228137 | 1.16343121  | 1.16600992  | antisense        | 21 | 47666804  | 47667596            |
| ENSG00000228140 | 2.928422289 | 1.802319292 | processed_transc | 1  | 15729475  | 15735929            |
| ENSG00000228141 | 0.869158192 | 0.697730409 | lincRNA          | 15 | 83379223  | 83382778            |
| ENSG00000228146 | 2.238690726 | 2.652276565 | protein_coding   | 16 | 3194244   | 3199964             |
| ENSG00000228149 | 0.869158192 | 0.950786998 | pseudogene       | 21 | 37541268  | 37542478 RPL3P1     |

|                 |             |             |                  |    |           |                      |
|-----------------|-------------|-------------|------------------|----|-----------|----------------------|
| ENSG00000228150 | 1.16343121  | 1.353254395 | processed_transc | 1  | 10002981  | 10010032             |
| ENSG00000228157 | 0           | 0.390640832 | protein_coding   | 17 | 18996287  | 18999674             |
| ENSG00000228158 | 3.652182994 | 3.183544561 | pseudogene       | X  | 64627964  | 64628565 TLE1P1      |
| ENSG00000228168 | 0.499066092 | 0.390640832 | pseudogene       | 3  | 39376470  | 39377430 HNRNPA1P21  |
| ENSG00000228169 | 0           | 0.390640832 | pseudogene       | 10 | 116449902 | 116450393 PPIAP19    |
| ENSG00000228172 | 1.16343121  | 0.390640832 | processed_transc | 1  | 26143240  | 26146263             |
| ENSG00000228175 | 3.603959378 | 4.075511708 | pseudogene       | 1  | 90459152  | 90459880 GEMIN8P4    |
| ENSG00000228176 | 0.499066092 | 0           | lincRNA          | 1  | 30181698  | 30182394             |
| ENSG00000228184 | 1.16343121  | 0           | pseudogene       | 21 | 14897920  | 14900900 SNX19P1     |
| ENSG00000228192 | 0.499066092 | 1.353254395 | antisense        | 1  | 43307569  | 43312058             |
| ENSG00000228195 | 0           | 0.390640832 | pseudogene       | 10 | 118509416 | 118510772            |
| ENSG00000228196 | 0           | 0.390640832 | pseudogene       | 1  | 178715818 | 178716889 PTPN2P1    |
| ENSG00000228201 | 1.16343121  | 2.144285137 | antisense        | 16 | 698473    | 699200               |
| ENSG00000228203 | 2.928422289 | 2.144285137 | processed_transc | 2  | 7052408   | 7058813              |
| ENSG00000228205 | 3.393122761 | 3.935919592 | pseudogene       | 3  | 183867492 | 183868223            |
| ENSG00000228208 | 0           | 1.518964905 | protein_coding   | 1  | 218683438 | 218699320 C1orf143   |
| ENSG00000228212 | 1.799000381 | 1.16600992  | pseudogene       | 5  | 37209466  | 37212483 OFD1P17     |
| ENSG00000228214 | 0           | 0.390640832 | antisense        | 3  | 28616282  | 28799296             |
| ENSG00000228218 | 0.869158192 | 0.950786998 | pseudogene       | 17 | 74221832  | 74222887 ATF4P3      |
| ENSG00000228223 | 7.149084042 | 7.260948155 | lincRNA          | 6  | 26522076  | 26526807 HCG11       |
| ENSG00000228224 | 3.335220907 | 3.453019579 | pseudogene       | 8  | 102374022 | 102384935 NACAP1     |
| ENSG00000228232 | 4.962122459 | 4.250702764 | pseudogene       | X  | 39646386  | 39647390 GAPDHP1     |
| ENSG00000228234 | 0           | 0.390640832 | pseudogene       | 20 | 36231254  | 36231587             |
| ENSG00000228235 | 5.054730169 | 5.339632724 | lincRNA          | 21 | 47472510  | 47473019             |
| ENSG00000228236 | 0           | 0.697730409 | pseudogene       | 2  | 149925146 | 149925424            |
| ENSG00000228237 | 0.869158192 | 0.697730409 | antisense        | 1  | 47139708  | 47157770             |
| ENSG00000228242 | 1.960915222 | 1.667587519 | antisense        | 3  | 14186320  | 14189784             |
| ENSG00000228246 | 5.431503808 | 3.813624741 | processed_transc | 7  | 2757467   | 2762622              |
| ENSG00000228247 | 0.499066092 | 0.390640832 | pseudogene       | 1  | 218023745 | 218023975 UBBP2      |
| ENSG00000228251 | 1.616589159 | 1.16600992  | lincRNA          | 2  | 113348373 | 113349516            |
| ENSG00000228252 | 0.499066092 | 1.667587519 | pseudogene       | 3  | 129931666 | 129992649 COL6A4P2   |
| ENSG00000228253 | 13.37689149 | 12.10218572 | protein_coding   | MT | 8366      | 8572                 |
| ENSG00000228261 | 1.16343121  | 1.353254395 | lincRNA          | 10 | 106083127 | 106086762            |
| ENSG00000228262 | 0           | 0.390640832 | lincRNA          | 2  | 34902646  | 34963298             |
| ENSG00000228264 | 1.16343121  | 1.16600992  | pseudogene       | 1  | 154386845 | 154387613            |
| ENSG00000228265 | 3.698846687 | 3.32456471  | lincRNA          | 20 | 32570858  | 32582163             |
| ENSG00000228271 | 2.10647801  | 2.242360793 | lincRNA          | 3  | 193994471 | 194005157            |
| ENSG00000228274 | 4.464551814 | 4.693656882 | antisense        | 22 | 39063835  | 39077825             |
| ENSG00000228275 | 0.499066092 | 0           | antisense        | X  | 100877973 | 100879154 ARMCX3-AS1 |
| ENSG00000228283 | 1.407729925 | 0           | pseudogene       | 6  | 147122809 | 147124960            |
| ENSG00000228285 | 1.16343121  | 0.390640832 | pseudogene       | 6  | 33333325  | 33334020 LYPLA2P1    |
| ENSG00000228286 | 0           | 0.390640832 | pseudogene       | 11 | 71960900  | 71962332             |
| ENSG00000228288 | 3.335220907 | 4.17820932  | antisense        | 1  | 202780082 | 202781284            |
| ENSG00000228292 | 0           | 0.697730409 | pseudogene       | 9  | 37205109  | 37205365             |
| ENSG00000228294 | 3.077135474 | 4.547834947 | lincRNA          | 14 | 19670480  | 19686002             |
| ENSG00000228300 | 5.741167503 | 6.155435249 | protein_coding   | 19 | 1275438   | 1279227 C19orf24     |
| ENSG00000228302 | 4.593635215 | 3.279072565 | antisense        | 10 | 12287627  | 12289844             |
| ENSG00000228305 | 1.960915222 | 2.420525079 | pseudogene       | 2  | 63849309  | 63849965             |
| ENSG00000228313 | 1.799000381 | 1.667587519 | protein_coding   | 14 | 23064715  | 23067855             |
| ENSG00000228314 | 0.869158192 | 2.242360793 | pseudogene       | 21 | 15215454  | 15220685 CYP4F29P    |
| ENSG00000228315 | 7.524276744 | 7.786986696 | pseudogene       | 22 | 23980674  | 24059543 GUSBP11     |
| ENSG00000228316 | 0.499066092 | 0.390640832 | pseudogene       | X  | 102053324 | 102054488            |
| ENSG00000228317 | 0.499066092 | 0.390640832 | antisense        | 9  | 108316316 | 108320310            |
| ENSG00000228318 | 0.499066092 | 0.950786998 | antisense        | 21 | 42813321  | 42814669             |
| ENSG00000228322 | 0.499066092 | 0.697730409 | processed_transc | 9  | 4299390   | 4306046              |
| ENSG00000228323 | 2.762599152 | 1.667587519 | antisense        | 19 | 54357835  | 54372361             |
| ENSG00000228327 | 2.671945279 | 3.279072565 | processed_transc | 1  | 700237    | 714006               |
| ENSG00000228328 | 1.16343121  | 1.802319292 | pseudogene       | X  | 67290362  | 67291609             |
| ENSG00000228330 | 0           | 0.697730409 | pseudogene       | 10 | 13184185  | 13184977             |
| ENSG00000228331 | 1.16343121  | 0.390640832 | pseudogene       | 17 | 19400256  | 19400842             |
| ENSG00000228335 | 1.407729925 | 1.353254395 | pseudogene       | 7  | 99040513  | 99041119             |
| ENSG00000228341 | 0           | 0.390640832 | pseudogene       | 7  | 107090528 | 107090807            |
| ENSG00000228342 | 0           | 1.353254395 | lincRNA          | 6  | 41107594  | 41108570             |



|                 |             |             |                  |   |    |           |                      |
|-----------------|-------------|-------------|------------------|---|----|-----------|----------------------|
| ENSG00000228343 | 5.848544806 | 5.593003837 | antisense        | X |    | 48438162  | 48439545             |
| ENSG00000228344 | 3.603959378 | 3.935919592 | protein_coding   |   | 18 | 5232875   | 5238332              |
| ENSG00000228347 | 0.499066092 | 0           | pseudogene       |   | 1  | 104695928 | 104696452 FTLP17     |
| ENSG00000228348 | 0.499066092 | 0           | pseudogene       |   | 1  | 35587623  | 35588085             |
| ENSG00000228349 | 0           | 0.390640832 | pseudogene       |   | 21 | 40863470  | 40863824 RPS26P4     |
| ENSG00000228350 | 0.499066092 | 0.950786998 | antisense        |   | 3  | 48701209  | 48706607             |
| ENSG00000228352 | 1.960915222 | 0.950786998 | antisense        |   | 9  | 34084330  | 34096676             |
| ENSG00000228354 | 0           | 0.390640832 | pseudogene       | X |    | 52684257  | 52686304             |
| ENSG00000228358 | 1.616589159 | 2.144285137 | lincRNA          |   | 4  | 118281781 | 118294008            |
| ENSG00000228360 | 0.499066092 | 0.390640832 | pseudogene       |   | 7  | 138912283 | 138912574            |
| ENSG00000228363 | 2.35979773  | 1.802319292 | antisense        |   | 2  | 86789198  | 86845889             |
| ENSG00000228364 | 0           | 0.697730409 | pseudogene       |   | 6  | 29044350  | 29044945             |
| ENSG00000228366 | 0.499066092 | 1.16600992  | pseudogene       |   | 9  | 108472571 | 108473062            |
| ENSG00000228368 | 0.869158192 | 0.697730409 | protein_coding   |   | 7  | 116605900 | 116607526            |
| ENSG00000228369 | 0.499066092 | 0.390640832 | antisense        |   | 1  | 52516590  | 52518355             |
| ENSG00000228376 | 0           | 0.390640832 | pseudogene       |   | 9  | 99838528  | 99840128             |
| ENSG00000228380 | 0           | 0.390640832 | pseudogene       |   | 2  | 209134067 | 209134681            |
| ENSG00000228382 | 0           | 0.390640832 | sense_intronic   |   | 1  | 226844341 | 226862768 ITPKB-IT1  |
| ENSG00000228386 | 0.499066092 | 1.16600992  | lincRNA          |   | 20 | 32602775  | 32605555             |
| ENSG00000228389 | 2.238690726 | 2.912743273 | antisense        |   | 2  | 172629992 | 172632354            |
| ENSG00000228393 | 2.471521042 | 2.652276565 | antisense        |   | 7  | 104590762 | 104653491            |
| ENSG00000228395 | 1.960915222 | 2.652276565 | antisense        |   | 9  | 131291180 | 131314689            |
| ENSG00000228397 | 0.869158192 | 0.390640832 | lincRNA          |   | 1  | 22350487  | 22351461             |
| ENSG00000228398 | 0           | 0.697730409 | pseudogene       |   | 3  | 141583849 | 141584121 HMGN2P25   |
| ENSG00000228399 | 1.16343121  | 1.667587519 | pseudogene       |   | 1  | 101721830 | 101722172            |
| ENSG00000228401 | 0.499066092 | 0           | antisense        |   | 9  | 139543062 | 139554873            |
| ENSG00000228404 | 0.869158192 | 0.390640832 | antisense        |   | 21 | 47604993  | 47608855             |
| ENSG00000228407 | 1.16343121  | 0.950786998 | pseudogene       |   | 1  | 52625942  | 52626274             |
| ENSG00000228409 | 5.60078458  | 5.726093467 | pseudogene       |   | 7  | 65216129  | 65228341 CCT6P1      |
| ENSG00000228412 | 0.499066092 | 1.802319292 | processed_transc |   | 6  | 19803602  | 19804973             |
| ENSG00000228413 | 1.616589159 | 0.950786998 | pseudogene       |   | 3  | 195771566 | 195772125            |
| ENSG00000228414 | 0           | 0.390640832 | processed_transc |   | 2  | 61052267  | 61108449             |
| ENSG00000228415 | 1.16343121  | 2.144285137 | pseudogene       |   | 6  | 30601409  | 30601675 PTMAP1      |
| ENSG00000228417 | 0.499066092 | 0           | antisense        |   | 10 | 111967608 | 111968349            |
| ENSG00000228420 | 0           | 0.697730409 | lincRNA          |   | 1  | 110370977 | 110414058            |
| ENSG00000228422 | 0           | 0.390640832 | lincRNA          |   | 20 | 11781111  | 11851363 C20orf61    |
| ENSG00000228423 | 0           | 0.390640832 | lincRNA          |   | 1  | 8865919   | 8867110              |
| ENSG00000228432 | 0.499066092 | 0           | pseudogene       |   | 6  | 31334129  | 31334675 DHFRP2      |
| ENSG00000228434 | 6.059927234 | 5.593003837 | processed_transc |   | 7  | 44043645  | 44047465             |
| ENSG00000228436 | 1.407729925 | 1.925536307 | antisense        |   | 1  | 39325672  | 39385068             |
| ENSG00000228437 | 6.146643566 | 5.466810074 | lincRNA          |   | 1  | 222139683 | 222158306            |
| ENSG00000228439 | 3.146112541 | 3.027231696 | antisense        |   | 6  | 99968569  | 99979794             |
| ENSG00000228444 | 2.762599152 | 2.501982735 | antisense        |   | 13 | 76203370  | 76206271 LMO7-AS1    |
| ENSG00000228446 | 1.16343121  | 1.16600992  | pseudogene       |   | 2  | 225364103 | 225364817            |
| ENSG00000228450 | 0           | 0.390640832 | pseudogene       | X |    | 130626257 | 130626860            |
| ENSG00000228451 | 3.393122761 | 4.406904905 | pseudogene       |   | 8  | 26236775  | 26240469 SDAD1P1     |
| ENSG00000228452 | 1.960915222 | 0.950786998 | antisense        |   | 1  | 43241484  | 43242461             |
| ENSG00000228456 | 0.499066092 | 0.950786998 | pseudogene       |   | 9  | 45442004  | 45442713             |
| ENSG00000228459 | 0.869158192 | 0           | protein_coding   | X |    | 3189861   | 3202694 CXorf28      |
| ENSG00000228463 | 5.175139844 | 5.84793576  | processed_transc |   | 1  | 227615    | 267253               |
| ENSG00000228466 | 0           | 0.390640832 | pseudogene       | X |    | 122695493 | 122696817            |
| ENSG00000228470 | 1.799000381 | 2.242360793 | processed_transc |   | 1  | 214517515 | 214530958            |
| ENSG00000228474 | 9.020358234 | 9.66813905  | protein_coding   |   | 2  | 27293340  | 27294641 OST4        |
| ENSG00000228477 | 2.10647801  | 2.242360793 | pseudogene       |   | 1  | 40428352  | 40429076             |
| ENSG00000228481 | 0.869158192 | 0           | antisense        |   | 2  | 45901840  | 45902615             |
| ENSG00000228484 | 0.869158192 | 1.16600992  | lincRNA          |   | 10 | 116524547 | 116539662            |
| ENSG00000228485 | 0.499066092 | 1.16600992  | processed_transc |   | 10 | 120968043 | 120971272            |
| ENSG00000228486 | 3.146112541 | 4.274079748 | processed_transc |   | 2  | 98280680  | 98319519             |
| ENSG00000228487 | 0.869158192 | 0.390640832 | antisense        |   | 9  | 129976314 | 129984186            |
| ENSG00000228488 | 0           | 0.950786998 | lincRNA          |   | 2  | 101338683 | 101339344            |
| ENSG00000228492 | 6.220467583 | 6.3217081   | pseudogene       | X |    | 73422669  | 73424477 RAB11FIP1P1 |
| ENSG00000228499 | 1.16343121  | 1.667587519 | pseudogene       |   | 2  | 236791006 | 236791137 TMSB10P1   |
| ENSG00000228501 | 0.869158192 | 1.16600992  | pseudogene       |   | 13 | 100802771 | 100803346 RPL15P18   |

|                 |             |             |                  |    |           |           |            |
|-----------------|-------------|-------------|------------------|----|-----------|-----------|------------|
| ENSG00000228502 | 4.19837882  | 4.528525526 | pseudogene       | 1  | 96912486  | 96913874  | EEF1A1P11  |
| ENSG00000228506 | 4.381167248 | 4.794098771 | antisense        | 6  | 99872798  | 99879249  |            |
| ENSG00000228507 | 0.499066092 | 1.16600992  | pseudogene       | 2  | 172347932 | 172348441 | MRPS29P2   |
| ENSG00000228508 | 0.869158192 | 0.390640832 | processed_transc | 10 | 24536208  | 24540350  |            |
| ENSG00000228509 | 2.671945279 | 3.608232228 | antisense        | 2  | 191541670 | 191573442 |            |
| ENSG00000228510 | 2.35979773  | 0.697730409 | pseudogene       | 9  | 131207280 | 131208907 |            |
| ENSG00000228513 | 0           | 0.697730409 | pseudogene       | 2  | 203926037 | 203927126 |            |
| ENSG00000228519 | 0.869158192 | 0.390640832 | pseudogene       | X  | 25663839  | 25664444  |            |
| ENSG00000228521 | 0.499066092 | 0           | lincRNA          | 7  | 154995857 | 154996899 |            |
| ENSG00000228522 | 0.869158192 | 0.697730409 | pseudogene       | 9  | 67285298  | 67298632  |            |
| ENSG00000228525 | 0           | 1.353254395 | pseudogene       | 1  | 227145770 | 227145968 |            |
| ENSG00000228526 | 0.499066092 | 1.16600992  | lincRNA          | 1  | 9228327   | 9262678   |            |
| ENSG00000228532 | 5.175139844 | 5.6022688   | protein_coding   | X  | 114952650 | 114953669 |            |
| ENSG00000228536 | 0           | 0.950786998 | lincRNA          | 1  | 219583023 | 219585283 |            |
| ENSG00000228540 | 0.869158192 | 0.390640832 | sense_intronic   | 7  | 110364215 | 110365881 | IMMP2L-IT1 |
| ENSG00000228541 | 0           | 0.697730409 | lincRNA          | 2  | 62690262  | 62691205  |            |
| ENSG00000228543 | 0           | 0.390640832 | lincRNA          | X  | 9217960   | 9243246   |            |
| ENSG00000228544 | 3.603959378 | 5.072639111 | antisense        | 9  | 139698379 | 139703300 |            |
| ENSG00000228546 | 3.335220907 | 2.971122874 | pseudogene       | 7  | 101977727 | 101979559 |            |
| ENSG00000228547 | 0.499066092 | 0           | pseudogene       | 10 | 15041102  | 15042077  |            |
| ENSG00000228549 | 0.869158192 | 1.16600992  | antisense        | 1  | 17197440  | 17200587  |            |
| ENSG00000228554 | 2.35979773  | 1.518964905 | antisense        | 7  | 39739940  | 39742895  |            |
| ENSG00000228568 | 0           | 0.390640832 | pseudogene       | 2  | 72515914  | 72516239  |            |
| ENSG00000228569 | 0           | 0.697730409 | lincRNA          | 7  | 156225217 | 156228527 |            |
| ENSG00000228589 | 0.499066092 | 0.950786998 | pseudogene       | 1  | 28421582  | 28422933  |            |
| ENSG00000228594 | 5.879259127 | 6.281901708 | protein_coding   | 1  | 1533392   | 1535476   |            |
| ENSG00000228596 | 0.499066092 | 0           | antisense        | 7  | 44824649  | 44826939  |            |
| ENSG00000228599 | 0.869158192 | 0.950786998 | pseudogene       | 22 | 40502329  | 40503070  |            |
| ENSG00000228601 | 0           | 0.390640832 | pseudogene       | 20 | 55034484  | 55034639  | RPL39P     |
| ENSG00000228604 | 0.869158192 | 0.697730409 | lincRNA          | 20 | 21129382  | 21143531  |            |
| ENSG00000228606 | 2.10647801  | 2.501982735 | antisense        | 1  | 160231534 | 160232568 |            |
| ENSG00000228609 | 5.018397273 | 4.547834947 | lincRNA          | X  | 100258821 | 100262962 |            |
| ENSG00000228612 | 0           | 0.697730409 | pseudogene       | X  | 79827370  | 79830106  | HK2P1      |
| ENSG00000228614 | 0           | 0.390640832 | antisense        | 6  | 53655673  | 53659072  |            |
| ENSG00000228622 | 0           | 0.390640832 | lincRNA          | 22 | 33501369  | 33502045  |            |
| ENSG00000228623 | 7.242608348 | 7.225413142 | lincRNA          | 9  | 115759495 | 115774507 | ZNF883     |
| ENSG00000228624 | 1.960915222 | 3.411459265 | processed_transc | 6  | 114290865 | 114792869 |            |
| ENSG00000228626 | 0.499066092 | 0           | pseudogene       | 1  | 147760107 | 147761057 |            |
| ENSG00000228630 | 1.16343121  | 3.411459265 | antisense        | 12 | 54356092  | 54368740  | HOTAIR     |
| ENSG00000228634 | 1.616589159 | 1.667587519 | lincRNA          | 1  | 32398621  | 32399576  |            |
| ENSG00000228638 | 4.642199401 | 4.101879561 | pseudogene       | 3  | 48332283  | 48332865  |            |
| ENSG00000228643 | 0           | 0.697730409 | processed_transc | 2  | 286419    | 301515    |            |
| ENSG00000228649 | 7.740446424 | 6.651226688 | processed_transc | 7  | 22895705  | 22900458  |            |
| ENSG00000228653 | 2.57521082  | 2.242360793 | pseudogene       | 7  | 63961203  | 63962107  |            |
| ENSG00000228657 | 0           | 0.390640832 | pseudogene       | 10 | 104332514 | 104332982 |            |
| ENSG00000228660 | 0           | 0.390640832 | pseudogene       | 7  | 63423809  | 63424501  | VN1R35P    |
| ENSG00000228661 | 1.16343121  | 1.667587519 | antisense        | 11 | 3875548   | 3876739   |            |
| ENSG00000228663 | 0.869158192 | 0.950786998 | pseudogene       | 20 | 49530268  | 49530948  | PSMD10P1   |
| ENSG00000228665 | 0.499066092 | 1.353254395 | pseudogene       | 1  | 109572688 | 109572941 |            |
| ENSG00000228666 | 0           | 0.390640832 | pseudogene       | 6  | 28936907  | 28938237  | KRT18P1    |
| ENSG00000228667 | 0.869158192 | 0           | pseudogene       | 10 | 25156574  | 25157119  |            |
| ENSG00000228668 | 0.499066092 | 0.390640832 | TR_V_pseudogen   | 7  | 38384631  | 38385100  | TRGV5P     |
| ENSG00000228671 | 0.499066092 | 1.667587519 | lincRNA          | 10 | 131581117 | 131584811 |            |
| ENSG00000228672 | 6.548110424 | 6.264499759 | protein_coding   | 5  | 138727635 | 138730885 | C5orf65    |
| ENSG00000228673 | 0.499066092 | 0.390640832 | sense_intronic   | 10 | 74461207  | 74463097  |            |
| ENSG00000228677 | 0.499066092 | 0           | antisense        | 21 | 38559967  | 38566227  | TTC3-AS1   |
| ENSG00000228678 | 1.407729925 | 0.390640832 | lincRNA          | 9  | 33500946  | 33502751  |            |
| ENSG00000228679 | 0.499066092 | 0.390640832 | lincRNA          | 6  | 84693447  | 84717042  |            |
| ENSG00000228681 | 0.499066092 | 0           | pseudogene       | 2  | 225159647 | 225160470 |            |
| ENSG00000228686 | 0.869158192 | 0.390640832 | antisense        | 1  | 175986413 | 175987896 |            |
| ENSG00000228692 | 0.499066092 | 0           | lincRNA          | 6  | 164007615 | 164009197 |            |
| ENSG00000228695 | 0.499066092 | 0           | pseudogene       | 16 | 55794460  | 55828070  | CES1P1     |
| ENSG00000228696 | 1.407729925 | 0.697730409 | protein_coding   | 17 | 44376501  | 44439163  | ARL17B     |

|                 |             |             |                  |    |           |                    |
|-----------------|-------------|-------------|------------------|----|-----------|--------------------|
| ENSG00000228701 | 1.16343121  | 1.667587519 | antisense        | 10 | 93542596  | 93558048           |
| ENSG00000228702 | 0           | 0.390640832 | pseudogene       | 10 | 46221142  | 46221486           |
| ENSG00000228705 | 1.960915222 | 0.950786998 | antisense        | 20 | 61405480  | 61406764           |
| ENSG00000228707 | 2.238690726 | 3.748356452 | lincRNA          | 9  | 118774640 | 118775244          |
| ENSG00000228708 | 0           | 2.039052734 | processed_transc | 21 | 19849676  | 19858917           |
| ENSG00000228709 | 5.637181576 | 5.66550919  | processed_transc | 21 | 45905460  | 45910171           |
| ENSG00000228716 | 8.810621286 | 8.965221116 | protein_coding   | 5  | 79922047  | 79950802 DHFR      |
| ENSG00000228717 | 0.499066092 | 0.390640832 | pseudogene X     |    | 150394701 | 150396187          |
| ENSG00000228718 | 0.869158192 | 0           | lincRNA          | 6  | 2637170   | 2640235            |
| ENSG00000228719 | 1.799000381 | 1.16600992  | lincRNA          | 22 | 36841445  | 36850991           |
| ENSG00000228723 | 0.499066092 | 0           | antisense        | 3  | 9234177   | 9236137 SRGAP3-AS2 |
| ENSG00000228726 | 1.16343121  | 0.697730409 | antisense        | 10 | 75855924  | 75862185           |
| ENSG00000228727 | 5.072559152 | 5.516660875 | protein_coding   | 6  | 31730576  | 31732628 SAPCD1    |
| ENSG00000228728 | 0           | 1.16600992  | pseudogene X     |    | 149987226 | 149987719          |
| ENSG00000228737 | 0           | 0.950786998 | antisense        | 5  | 140997981 | 141006048          |
| ENSG00000228741 | 2.10647801  | 2.144285137 | processed_transc | 13 | 24553949  | 24608145           |
| ENSG00000228742 | 5.175139844 | 5.09905904  | lincRNA          | 7  | 106415457 | 106436010          |
| ENSG00000228747 | 0.499066092 | 0           | antisense        | 7  | 87858974  | 87861089           |
| ENSG00000228748 | 1.16343121  | 0.950786998 | antisense        | 10 | 79542624  | 79551665           |
| ENSG00000228754 | 0           | 0.390640832 | pseudogene       | 10 | 49953590  | 49954173           |
| ENSG00000228759 | 0           | 0.390640832 | pseudogene       | 10 | 93525656  | 93526953           |
| ENSG00000228763 | 0           | 0.697730409 | antisense        | 2  | 109293251 | 109295057          |
| ENSG00000228767 | 0.869158192 | 1.16600992  | pseudogene       | 3  | 35257197  | 35258641 KRT8P18   |
| ENSG00000228768 | 1.616589159 | 1.16600992  | protein_coding   | 17 | 29898161  | 29902678           |
| ENSG00000228772 | 0           | 0.390640832 | lincRNA          | 6  | 22589366  | 22594062           |
| ENSG00000228775 | 1.407729925 | 2.912743273 | processed_transc | 7  | 141404138 | 141438146          |
| ENSG00000228779 | 2.10647801  | 1.802319292 | antisense        | 16 | 175736    | 177218             |
| ENSG00000228781 | 0.499066092 | 0           | pseudogene       | 9  | 80795130  | 80795609           |
| ENSG00000228782 | 2.671945279 | 3.493416095 | protein_coding   | 17 | 45527593  | 45569849           |
| ENSG00000228784 | 0.869158192 | 1.518964905 | processed_transc | 2  | 20068621  | 20084808           |
| ENSG00000228791 | 0.869158192 | 0.697730409 | lincRNA          | 3  | 24535578  | 24541502           |
| ENSG00000228793 | 0.499066092 | 0.950786998 | lincRNA          | 6  | 3594481   | 3624981            |
| ENSG00000228794 | 7.058051099 | 7.20731193  | processed_transc | 1  | 762988    | 794826             |
| ENSG00000228797 | 0.869158192 | 0.390640832 | pseudogene       | 13 | 19271143  | 19271647 FAM207BP  |
| ENSG00000228800 | 0           | 0.950786998 | lincRNA          | 10 | 30842783  | 30843412           |
| ENSG00000228801 | 4.999881834 | 4.917990497 | antisense        | 8  | 52811885  | 52859733           |
| ENSG00000228802 | 0           | 0.697730409 | antisense        | 2  | 224830418 | 224832423          |
| ENSG00000228803 | 0           | 0.390640832 | pseudogene       | 7  | 22787294  | 22788423           |
| ENSG00000228804 | 0.869158192 | 0           | protein_coding   | 3  | 187420101 | 187451637          |
| ENSG00000228807 | 0           | 0.390640832 | pseudogene       | 22 | 44879375  | 44879597           |
| ENSG00000228808 | 0.869158192 | 0.390640832 | pseudogene       | 13 | 100024427 | 100024940 HMGB3P4  |
| ENSG00000228809 | 1.16343121  | 0.697730409 | antisense        | 20 | 16695489  | 16711593           |
| ENSG00000228812 | 1.407729925 | 1.353254395 | antisense        | 20 | 60928066  | 60931536           |
| ENSG00000228816 | 3.077135474 | 3.493416095 | pseudogene       | 10 | 33233409  | 33233927 AK3P5     |
| ENSG00000228817 | 0.499066092 | 0.697730409 | sense_intronic   | 21 | 30744821  | 30745886 BACH1-IT2 |
| ENSG00000228818 | 2.57521082  | 2.501982735 | pseudogene       | 1  | 240305970 | 240308689          |
| ENSG00000228819 | 0           | 0.697730409 | pseudogene X     |    | 131264119 | 131265380          |
| ENSG00000228820 | 0           | 0.390640832 | pseudogene       | 20 | 49747325  | 49748204 RPSAP1    |
| ENSG00000228824 | 0           | 0.390640832 | processed_transc | 13 | 88096247  | 88323514 MIR4500HG |
| ENSG00000228826 | 0.869158192 | 0           | lincRNA          | 1  | 121236177 | 121252295          |
| ENSG00000228828 | 1.407729925 | 2.501982735 | pseudogene       | 10 | 38107534  | 38109910           |
| ENSG00000228829 | 0           | 0.390640832 | pseudogene       | 7  | 75803051  | 75806523           |
| ENSG00000228832 | 0.869158192 | 1.16600992  | antisense        | 10 | 33608520  | 33609590           |
| ENSG00000228838 | 0           | 1.16600992  | antisense        | 1  | 53753696  | 53755378           |
| ENSG00000228839 | 0.869158192 | 2.039052734 | antisense        | 22 | 31688485  | 31734007           |
| ENSG00000228844 | 0           | 0.390640832 | pseudogene       | 1  | 240799899 | 240800352          |
| ENSG00000228847 | 0.499066092 | 1.667587519 | pseudogene X     |    | 41958007  | 41958426 ATP5G2P4  |
| ENSG00000228852 | 0           | 1.16600992  | antisense        | 1  | 95708781  | 95729610           |
| ENSG00000228857 | 2.238690726 | 2.971122874 | lincRNA          | 2  | 114588626 | 114600933          |
| ENSG00000228865 | 0.499066092 | 0           | antisense        | 10 | 48357926  | 48358600           |
| ENSG00000228866 | 0.869158192 | 1.518964905 | antisense        | 9  | 139932430 | 139933342          |
| ENSG00000228868 | 0.499066092 | 0           | pseudogene       | 3  | 75377700  | 75388222 MYLK1P1   |
| ENSG00000228872 | 0           | 0.390640832 | pseudogene       | 2  | 63944256  | 63945033           |

|                 |             |             |                    |   |    |           |                    |
|-----------------|-------------|-------------|--------------------|---|----|-----------|--------------------|
| ENSG00000228873 | 0.869158192 | 0.390640832 | lincRNA            |   | 2  | 96811341  | 96812751           |
| ENSG00000228878 | 1.960915222 | 2.579085888 | processed_transc   |   | 7  | 35794574  | 35840226           |
| ENSG00000228879 | 0.499066092 | 0.390640832 | pseudogene         |   | 1  | 246918813 | 246919134          |
| ENSG00000228882 | 0.499066092 |             | 0 pseudogene       |   | 10 | 38741915  | 38744293 CICIP9    |
| ENSG00000228885 | 0           | 0.697730409 | antisense          | X |    | 102753723 | 102754210          |
| ENSG00000228886 | 0.869158192 |             | 0 lincRNA          |   | 13 | 45924458  | 45925485           |
| ENSG00000228887 | 1.16343121  | 1.518964905 | pseudogene         |   | 19 | 14181210  | 14182052           |
| ENSG00000228889 | 4.322773689 | 3.781359661 | processed_transc   |   | 13 | 99848696  | 99852964 UBAC2-AS1 |
| ENSG00000228897 | 1.16343121  | 1.353254395 | pseudogene         |   | 7  | 51454060  | 51454798           |
| ENSG00000228903 | 3.502389126 | 3.453019579 | pseudogene         |   | 7  | 44066550  | 44081491           |
| ENSG00000228906 | 1.616589159 | 1.667587519 | lincRNA            | X |    | 73168808  | 73169393           |
| ENSG00000228909 | 0.499066092 |             | 0 lincRNA          |   | 2  | 220768772 | 220769610          |
| ENSG00000228915 | 1.616589159 | 0.950786998 | pseudogene         |   | 11 | 71604456  | 71605479           |
| ENSG00000228919 | 0           | 1.802319292 | protein_coding     |   | 4  | 7940728   | 7942023            |
| ENSG00000228925 | 3.448790144 | 3.232099092 | processed_transc   |   | 2  | 47126414  | 47135817           |
| ENSG00000228929 | 4.097495944 | 4.319727133 | pseudogene         |   | 1  | 53237866  | 53238320           |
| ENSG00000228930 | 0.499066092 |             | 0 pseudogene       |   | 21 | 46796106  | 46796297 MTCO1P3   |
| ENSG00000228932 | 0.499066092 |             | 0 processed_transc |   | 9  | 132891870 | 132895515          |
| ENSG00000228933 | 2.238690726 | 2.501982735 | processed_transc   | X |    | 27193037  | 27417114           |
| ENSG00000228952 | 3.077135474 | 1.802319292 | lincRNA            |   | 3  | 187166633 | 187167238          |
| ENSG00000228955 | 1.616589159 | 0.950786998 | pseudogene         |   | 1  | 246795558 | 246795780          |
| ENSG00000228958 | 0.499066092 |             | 0 pseudogene       |   | 20 | 32552968  | 32553382           |
| ENSG00000228960 | 0.499066092 |             | 0 pseudogene       |   | 7  | 143991573 | 143998027 OR2A9P   |
| ENSG00000228962 | 0           | 0.950786998 | antisense          |   | 6  | 32358287  | 32361463 HCG23     |
| ENSG00000228972 | 0           | 0.390640832 | sense_intronic     |   | 6  | 128752086 | 128753913          |
| ENSG00000228974 | 0           | 0.697730409 | pseudogene         |   | 7  | 5600374   | 5600686            |
| ENSG00000228976 | 0           | 0.390640832 | pseudogene         |   | 6  | 108939203 | 108939488 SUMO2P8  |
| ENSG00000228979 | 0.869158192 | 0.950786998 | pseudogene         |   | 17 | 61548965  | 61549456           |
| ENSG00000228981 | 2.762599152 | 2.788380093 | pseudogene         |   | 4  | 144270428 | 144271270          |
| ENSG00000228986 | 0           | 0.390640832 | pseudogene         | X |    | 154521460 | 154522731          |
| ENSG00000228989 | 4.292665995 | 4.566889334 | antisense          |   | 2  | 242629829 | 242633704          |
| ENSG00000228991 | 5.525114348 | 3.64455972  | pseudogene         |   | 9  | 66693277  | 66721073           |
| ENSG00000228992 | 0.869158192 |             | 0 pseudogene       |   | 15 | 28140850  | 28141728           |
| ENSG00000228995 | 0.869158192 | 0.950786998 | pseudogene         |   | 20 | 55932482  | 55933425 MTND1P9   |
| ENSG00000228997 | 1.616589159 | 1.925536307 | pseudogene         |   | 10 | 10818186  | 10818624           |
| ENSG00000228998 | 6.023726639 | 6.091080508 | protein_coding     |   | 15 | 90818266  | 90820841           |
| ENSG00000229000 | 0           | 0.390640832 | pseudogene         |   | 19 | 54275760  | 54276534 SEPT7P8   |
| ENSG00000229001 | 0           | 0.390640832 | pseudogene         |   | 10 | 70782534  | 70783622           |
| ENSG00000229002 | 0.869158192 |             | 0 pseudogene       |   | 1  | 148542873 | 148545128          |
| ENSG00000229007 | 2.847891871 | 2.912743273 | pseudogene         |   | 21 | 33869122  | 33869621 EXOSC3P1  |
| ENSG00000229010 | 0.499066092 | 0.950786998 | pseudogene         |   | 1  | 23466818  | 23467635           |
| ENSG00000229016 | 0.499066092 | 0.390640832 | pseudogene         |   | 1  | 218474604 | 218475314          |
| ENSG00000229017 | 0           | 1.925536307 | antisense          |   | 6  | 143287561 | 143358719          |
| ENSG00000229018 | 1.407729925 | 1.16600992  | pseudogene         |   | 7  | 72476064  | 72555749           |
| ENSG00000229020 | 3.004694206 | 2.144285137 | pseudogene         |   | 1  | 113466045 | 113466966 AKR7A2P1 |
| ENSG00000229021 | 0.869158192 | 1.353254395 | processed_transc   |   | 1  | 151967007 | 152015250          |
| ENSG00000229022 | 0.869158192 | 1.16600992  | pseudogene         |   | 1  | 241995237 | 241996089          |
| ENSG00000229023 | 0           | 0.390640832 | pseudogene         |   | 2  | 191857365 | 191858293          |
| ENSG00000229029 | 0           | 0.697730409 | pseudogene         |   | 9  | 14593575  | 14594181           |
| ENSG00000229033 | 1.616589159 | 1.802319292 | processed_transc   | X |    | 122867024 | 122868144          |
| ENSG00000229036 | 2.238690726 | 2.242360793 | antisense          |   | 6  | 143824531 | 143827475          |
| ENSG00000229037 | 0.499066092 | 0.390640832 | pseudogene         | X |    | 53834274  | 53835116           |
| ENSG00000229043 | 6.386460534 | 6.392840898 | antisense          |   | 7  | 1199662   | 1204903            |
| ENSG00000229046 | 0           | 0.697730409 | pseudogene         |   | 21 | 33078868  | 33079177 HMGN1P2   |
| ENSG00000229052 | 0           | 0.390640832 | pseudogene         |   | 1  | 93396902  | 93397643           |
| ENSG00000229054 | 1.407729925 | 0.390640832 | pseudogene         |   | 7  | 33075824  | 33075994           |
| ENSG00000229056 | 3.393122761 | 2.721932731 | processed_transc   |   | 2  | 197124748 | 197128928          |
| ENSG00000229065 | 1.407729925 | 0.697730409 | antisense          |   | 9  | 97875990  | 97876743           |
| ENSG00000229068 | 0           | 0.390640832 | pseudogene         |   | 6  | 30434229  | 30435771 TMPOP1    |
| ENSG00000229070 | 2.671945279 | 2.851901313 | protein_coding     |   | 17 | 75440786  | 75443249           |
| ENSG00000229072 | 0           | 0.390640832 | pseudogene         |   | 3  | 40740557  | 40740829 HMGN2P24  |
| ENSG00000229081 | 1.799000381 | 1.925536307 | antisense          |   | 10 | 134334331 | 134335953          |
| ENSG00000229082 | 0.869158192 | 0.950786998 | pseudogene         | X |    | 130475421 | 130476426          |

|                 |             |             |                  |   |    |           |           |             |
|-----------------|-------------|-------------|------------------|---|----|-----------|-----------|-------------|
| ENSG00000229083 | 0.499066092 | 0.390640832 | pseudogene       | X |    | 12843959  | 12844952  | PSMA6P2     |
| ENSG00000229091 | 1.616589159 | 1.353254395 | pseudogene       |   | 7  | 10490938  | 10492153  |             |
| ENSG00000229097 | 3.211941663 | 2.971122874 | pseudogene       |   | 10 | 71923441  | 71923880  | CALM2P2     |
| ENSG00000229105 | 0.499066092 | 0.697730409 | antisense        |   | 9  | 119266562 | 119324572 |             |
| ENSG00000229106 | 0           | 0.390640832 | pseudogene       |   | 1  | 24227961  | 24229227  |             |
| ENSG00000229107 | 0           | 0.390640832 | pseudogene       |   | 22 | 21022124  | 21025272  | FAM108A5P   |
| ENSG00000229109 | 0           | 0.390640832 | antisense        |   | 9  | 85834246  | 85849157  |             |
| ENSG00000229111 | 0.869158192 | 0           | antisense        |   | 13 | 48651273  | 48654127  | MED4-AS1    |
| ENSG00000229112 | 0.499066092 | 0           | pseudogene       |   | 1  | 246691864 | 246692143 |             |
| ENSG00000229115 | 0           | 0.950786998 | pseudogene       |   | 9  | 126521499 | 126522054 |             |
| ENSG00000229117 | 10.42847557 | 11.05785962 | protein_coding   |   | 12 | 56510370  | 56511727  | RPL41       |
| ENSG00000229118 | 1.616589159 | 1.667587519 | lincRNA          |   | 2  | 112022860 | 112037457 |             |
| ENSG00000229119 | 1.616589159 | 2.144285137 | pseudogene       |   | 5  | 165809310 | 165809604 |             |
| ENSG00000229122 | 1.960915222 | 1.802319292 | sense_intronic   |   | 2  | 27283906  | 27284683  | AGBL5-IT1   |
| ENSG00000229124 | 3.950976309 | 4.127774132 | antisense        |   | 10 | 17256238  | 17268897  |             |
| ENSG00000229127 | 3.077135474 | 3.570966319 | antisense        |   | 2  | 210895457 | 210929080 |             |
| ENSG00000229132 | 3.502389126 | 3.64455972  | pseudogene       | X |    | 91368244  | 91369460  | EIF4A1P10   |
| ENSG00000229133 | 0.869158192 | 1.16600992  | pseudogene       |   | 1  | 68708157  | 68708738  | RPS7P4      |
| ENSG00000229137 | 0.869158192 | 1.353254395 | lincRNA          |   | 13 | 21861545  | 21868997  |             |
| ENSG00000229145 | 0.499066092 | 0.697730409 | pseudogene       | X |    | 46147451  | 46148563  | ACTBP1      |
| ENSG00000229152 | 5.158541613 | 4.990346085 | sense_intronic   |   | 13 | 111547406 | 111551519 | ANKRD10-IT1 |
| ENSG00000229153 | 0.499066092 | 0.950786998 | processed_transc |   | 7  | 143104906 | 143220542 |             |
| ENSG00000229154 | 0.869158192 | 0           | antisense        |   | 6  | 73844526  | 73853237  | KCNQ5-AS1   |
| ENSG00000229160 | 0           | 0.950786998 | lincRNA          |   | 2  | 38359779  | 38366088  |             |
| ENSG00000229161 | 1.616589159 | 1.353254395 | pseudogene       |   | 7  | 42834505  | 42842093  | TCP1P1      |
| ENSG00000229162 | 1.407729925 | 1.518964905 | antisense        |   | 1  | 25287836  | 25289588  |             |
| ENSG00000229165 | 0.499066092 | 0           | pseudogene       |   | 7  | 48942152  | 48943487  | GDI2P1      |
| ENSG00000229167 | 1.960915222 | 0.950786998 | antisense        |   | 1  | 32037186  | 32041174  |             |
| ENSG00000229168 | 0           | 0.697730409 | pseudogene       | X |    | 44508375  | 44508965  | RPL19P20    |
| ENSG00000229178 | 3.146112541 | 3.96493948  | processed_transc |   | 3  | 195382436 | 195384798 |             |
| ENSG00000229180 | 6.856698814 | 6.877938671 | lincRNA          |   | 7  | 65993425  | 66007536  |             |
| ENSG00000229186 | 4.381167248 | 4.508954154 | pseudogene       |   | 12 | 112337067 | 112339195 | ADAM1       |
| ENSG00000229190 | 0.869158192 | 0.950786998 | antisense        |   | 10 | 17737708  | 17742231  |             |
| ENSG00000229191 | 0.869158192 | 1.925536307 | processed_transc |   | 1  | 200993077 | 200997920 |             |
| ENSG00000229203 | 2.471521042 | 1.925536307 | lincRNA          |   | 2  | 132587374 | 132589604 |             |
| ENSG00000229204 | 0.869158192 | 0.697730409 | pseudogene       |   | 4  | 170712371 | 170712853 |             |
| ENSG00000229205 | 0           | 0.390640832 | non_coding       |   | 10 | 1205708   | 1210612   | LINC00200   |
| ENSG00000229207 | 1.407729925 | 1.353254395 | pseudogene       |   | 9  | 34318405  | 34319653  |             |
| ENSG00000229211 | 0.499066092 | 0.950786998 | pseudogene       |   | 8  | 31077410  | 31078500  |             |
| ENSG00000229212 | 3.652182994 | 3.679994897 | pseudogene       |   | 15 | 85747141  | 85778026  |             |
| ENSG00000229214 | 1.616589159 | 1.925536307 | processed_transc |   | 6  | 170188886 | 170198921 | LINC00242   |
| ENSG00000229217 | 0.499066092 | 0           | pseudogene       |   | 3  | 10099657  | 10099971  |             |
| ENSG00000229222 | 1.799000381 | 2.579085888 | pseudogene       |   | 20 | 48573282  | 48574569  | KRT18P4     |
| ENSG00000229227 | 1.616589159 | 1.667587519 | antisense        |   | 10 | 46937463  | 46951699  |             |
| ENSG00000229228 | 0.499066092 | 0.390640832 | antisense        |   | 1  | 231727038 | 231747836 |             |
| ENSG00000229230 | 0           | 0.697730409 | pseudogene       |   | 20 | 33805812  | 33805988  |             |
| ENSG00000229233 | 1.16343121  | 0           | lincRNA          |   | 7  | 12693804  | 12694610  |             |
| ENSG00000229235 | 0           | 0.390640832 | pseudogene       |   | 10 | 34952787  | 34953029  |             |
| ENSG00000229237 | 0.499066092 | 0           | pseudogene       | X |    | 154045374 | 154045676 | HMG1P26     |
| ENSG00000229241 | 0           | 0.697730409 | pseudogene       |   | 3  | 4023665   | 4025979   |             |
| ENSG00000229251 | 0.499066092 | 0           | pseudogene       |   | 7  | 84612863  | 84613825  | HNRNPA1P8   |
| ENSG00000229256 | 0.499066092 | 0.390640832 | pseudogene       |   | 10 | 104975466 | 104976557 | ST13P13     |
| ENSG00000229259 | 0           | 0.390640832 | pseudogene       |   | 1  | 32888815  | 32892390  |             |
| ENSG00000229261 | 1.407729925 | 1.925536307 | processed_transc |   | 10 | 70975089  | 70992246  |             |
| ENSG00000229267 | 0           | 0.390640832 | processed_transc |   | 2  | 215825116 | 215826786 |             |
| ENSG00000229268 | 0.499066092 | 0           | pseudogene       |   | 9  | 13986174  | 13987908  |             |
| ENSG00000229272 | 0.869158192 | 0           | antisense        |   | 10 | 120763048 | 120763396 |             |
| ENSG00000229273 | 2.238690726 | 1.802319292 | pseudogene       |   | 9  | 41954580  | 41955037  |             |
| ENSG00000229276 | 0.499066092 | 0           | sense_intronic   |   | 6  | 111681844 | 111682810 | REV3L-IT1   |
| ENSG00000229278 | 0.499066092 | 1.802319292 | antisense        |   | 10 | 101411746 | 101413662 |             |
| ENSG00000229282 | 0.499066092 | 0           | lincRNA          |   | 6  | 3056124   | 3056995   |             |
| ENSG00000229286 | 0           | 0.697730409 | pseudogene       |   | 22 | 16076052  | 16076172  |             |
| ENSG00000229291 | 0           | 0.950786998 | lincRNA          |   | 1  | 236121179 | 236135125 |             |

|                 |             |             |                  |    |           |                     |
|-----------------|-------------|-------------|------------------|----|-----------|---------------------|
| ENSG00000229292 | 0.499066092 |             | 0 protein_coding | 19 | 56280507  | 56284545            |
| ENSG00000229298 | 1.16343121  | 2.039052734 | pseudogene       | 9  | 21811620  | 21812346            |
| ENSG00000229304 | 0.499066092 | 0.697730409 | sense_intronic   | 10 | 121672907 | 121673914           |
| ENSG00000229314 | 0.869158192 |             | 0 protein_coding | 9  | 117085336 | 117088755 ORM1      |
| ENSG00000229320 | 5.995967334 | 6.445267191 | pseudogene       | 3  | 160283235 | 160287036 KRT8P12   |
| ENSG00000229323 | 0.499066092 |             | 0 lincRNA        | 13 | 51095069  | 51101585            |
| ENSG00000229324 | 0.869158192 | 0.697730409 | pseudogene       | X  | 70236381  | 70236755            |
| ENSG00000229325 | 2.762599152 | 1.353254395 | sense_intronic   | 3  | 195001452 | 195003470 ACAP2-IT1 |
| ENSG00000229326 | 1.16343121  | 0.390640832 | pseudogene       | 2  | 120456199 | 120457733           |
| ENSG00000229330 | 1.16343121  | 0.390640832 | sense_intronic   | 17 | 64672475  | 64673522            |
| ENSG00000229334 | 3.830412367 | 3.714580548 | antisense        | 3  | 194353652 | 194366130           |
| ENSG00000229336 | 0.869158192 | 0.390640832 | pseudogene       | 21 | 21112023  | 21112464            |
| ENSG00000229339 | 0           | 0.390640832 | pseudogene       | 3  | 42092673  | 42093186            |
| ENSG00000229344 | 7.254372086 | 6.919299326 | pseudogene       | 1  | 568137    | 568818              |
| ENSG00000229348 | 1.960915222 | 1.667587519 | antisense        | 1  | 43919598  | 43922666 HYI-AS1    |
| ENSG00000229349 | 1.616589159 | 0.950786998 | pseudogene       | 6  | 46172466  | 46175123 ACTG1P9    |
| ENSG00000229356 | 0.499066092 | 0.390640832 | antisense        | 21 | 45870869  | 45875167 LRRC3-AS1  |
| ENSG00000229358 | 5.207774174 | 4.888000647 | pseudogene       | 7  | 32660019  | 32801399            |
| ENSG00000229367 | 0           | 0.390640832 | pseudogene       | 1  | 229706279 | 229706543 HMG2P19   |
| ENSG00000229368 | 1.407729925 | 1.518964905 | processed_transc | 11 | 3875842   | 3876629             |
| ENSG00000229372 | 1.16343121  | 1.353254395 | antisense        | 1  | 43913447  | 43914315 SZT2-AS1   |
| ENSG00000229373 | 0.869158192 | 1.353254395 | lincRNA          | 13 | 114598076 | 114626485 LINC00452 |
| ENSG00000229376 | 0.499066092 | 0.697730409 | pseudogene       | 1  | 657465    | 660287 CICIP3       |
| ENSG00000229380 | 0.869158192 | 1.353254395 | antisense        | 7  | 601595    | 605256              |
| ENSG00000229382 | 1.407729925 |             | 0 lincRNA        | 21 | 46756622  | 46758580            |
| ENSG00000229388 | 1.799000381 | 1.518964905 | lincRNA          | 1  | 28969740  | 28975093            |
| ENSG00000229390 | 0           | 0.390640832 | pseudogene       | 6  | 29938578  | 29940241 MICD       |
| ENSG00000229391 | 0           | 0.390640832 | pseudogene       | 6  | 32520490  | 32527799 HLA-DRB6   |
| ENSG00000229393 | 0.499066092 | 0.950786998 | antisense        | 1  | 2424876   | 2425918             |
| ENSG00000229401 | 1.616589159 | 1.353254395 | lincRNA          | 6  | 10434549  | 10457014            |
| ENSG00000229413 | 4.19837882  | 3.368666104 | pseudogene       | 7  | 128293740 | 128293989           |
| ENSG00000229414 | 0.869158192 | 0.390640832 | processed_transc | 11 | 2861365   | 2882798 KCNQ1-AS1   |
| ENSG00000229415 | 2.471521042 | 0.390640832 | protein_coding   | 14 | 36942493  | 36983034 SFTA3      |
| ENSG00000229417 | 0.869158192 | 0.697730409 | pseudogene       | 10 | 97949122  | 97949975            |
| ENSG00000229419 | 1.960915222 | 1.802319292 | pseudogene       | 9  | 108282409 | 108288640 RALGAPA1P |
| ENSG00000229422 | 0.499066092 | 0.697730409 | pseudogene       | 9  | 66493572  | 66494196            |
| ENSG00000229431 | 3.004694206 | 3.714580548 | antisense        | 1  | 43850784  | 43854826            |
| ENSG00000229435 | 0           | 0.950786998 | pseudogene       | 7  | 159024125 | 159026067 PIP5K1P2  |
| ENSG00000229444 | 0           | 0.390640832 | antisense        | 1  | 44175063  | 44193014            |
| ENSG00000229447 | 1.616589159 | 1.353254395 | pseudogene       | 1  | 31736331  | 31736529            |
| ENSG00000229450 | 1.799000381 | 3.027231696 | protein_coding   | 4  | 120299287 | 120326749           |
| ENSG00000229455 | 0           | 1.518964905 | pseudogene       | 10 | 126178392 | 126179147 RPS10P18  |
| ENSG00000229456 | 0.499066092 | 0.390640832 | pseudogene       | 13 | 41192875  | 41195485 RLIMP1     |
| ENSG00000229463 | 0.499066092 |             | 0 sense_intronic | 1  | 236002783 | 236003482 LYST-IT2  |
| ENSG00000229468 | 0           | 0.390640832 | pseudogene       | 3  | 20053944  | 20054098            |
| ENSG00000229472 | 3.603959378 | 3.279072565 | antisense        | 20 | 32668955  | 32669754            |
| ENSG00000229473 | 0           | 0.390640832 | pseudogene       | 13 | 41566915  | 41567467 RGS17P1    |
| ENSG00000229474 | 2.35979773  | 5.018301917 | protein_coding   | 15 | 44957930  | 45003514 PATL2      |
| ENSG00000229481 | 5.375152132 | 4.622587519 | lincRNA          | 19 | 38320191  | 38322797            |
| ENSG00000229485 | 0           | 0.390640832 | pseudogene       | 10 | 42644758  | 42644997            |
| ENSG00000229487 | 1.616589159 | 2.039052734 | antisense        | X  | 110949877 | 110954329 ALG13-AS1 |
| ENSG00000229489 | 0           | 0.390640832 | pseudogene       | 9  | 43399987  | 43401310 ATP5A1P5   |
| ENSG00000229492 | 0.869158192 | 1.16600992  | pseudogene       | 22 | 17897744  | 17898875            |
| ENSG00000229497 | 0           | 0.390640832 | pseudogene       | 7  | 43806889  | 43807198            |
| ENSG00000229498 | 0.869158192 | 0.697730409 | antisense        | 2  | 86042253  | 86052514            |
| ENSG00000229507 | 1.16343121  | 1.353254395 | sense_intronic   | 17 | 57707431  | 57709331 CLTC-IT1   |
| ENSG00000229512 | 3.274897671 | 3.027231696 | sense_intronic   | 11 | 1784239   | 1784979             |
| ENSG00000229515 | 0           | 0.390640832 | pseudogene       | 3  | 46183850  | 46185169            |
| ENSG00000229519 | 1.16343121  | 1.667587519 | pseudogene       | 1  | 6607966   | 6608683             |
| ENSG00000229521 | 0.499066092 |             | 0 antisense      | 13 | 77654646  | 77655325 MYCBP2-AS2 |
| ENSG00000229523 | 0           | 0.390640832 | pseudogene       | 9  | 45729709  | 45730417            |
| ENSG00000229525 | 0.869158192 | 1.16600992  | processed_transc | 2  | 220253218 | 220268355           |
| ENSG00000229530 | 0.869158192 | 0.390640832 | pseudogene       | 9  | 95101940  | 95103945            |

|                 |             |             |                    |    |           |                      |
|-----------------|-------------|-------------|--------------------|----|-----------|----------------------|
| ENSG00000229534 | 0           | 0.390640832 | pseudogene         | 11 | 5592477   | 5593422              |
| ENSG00000229539 | 2.238690726 | 2.971122874 | antisense          | 20 | 3868886   | 3869515              |
| ENSG00000229543 | 0           | 0.390640832 | lincRNA            | 10 | 80053599  | 80060760             |
| ENSG00000229544 | 0.499066092 | 0.697730409 | protein_coding     | 10 | 126135592 | 126138753 NKX1-2     |
| ENSG00000229558 | 0.499066092 | 1.353254395 | lincRNA            | 13 | 23993110  | 24002818 SACS-AS1    |
| ENSG00000229563 | 0           | 0.390640832 | processed_transc X |    | 45364633  | 45489447             |
| ENSG00000229567 | 0           | 0.950786998 | pseudogene         | 1  | 93744518  | 93744686             |
| ENSG00000229585 | 0.499066092 | 0.390640832 | pseudogene         | 4  | 54852751  | 54853225 RPL21P44    |
| ENSG00000229587 | 2.35979773  | 1.925536307 | sense_intronic     | 9  | 77624744  | 77630953             |
| ENSG00000229589 | 2.471521042 | 2.912743273 | processed_transc   | 3  | 38492518  | 38496311             |
| ENSG00000229590 | 0           | 0.390640832 | pseudogene         | 17 | 56234809  | 56234926 MSX2P1      |
| ENSG00000229591 | 1.799000381 | 1.16600992  | antisense          | 7  | 151817086 | 151818802            |
| ENSG00000229595 | 0           | 0.390640832 | pseudogene         | 1  | 231253577 | 231254071            |
| ENSG00000229598 | 1.799000381 | 1.353254395 | pseudogene         | 22 | 39118748  | 39119510 PRDX3P1     |
| ENSG00000229601 | 0.499066092 | 0.390640832 | pseudogene X       |    | 70633684  | 70633936             |
| ENSG00000229604 | 1.16343121  | 0.697730409 | pseudogene         | 2  | 88124461  | 88124664 MT-ATP8     |
| ENSG00000229605 | 0.499066092 | 0           | pseudogene         | 10 | 29187925  | 29188422             |
| ENSG00000229608 | 0.499066092 | 1.518964905 | pseudogene         | 22 | 43180468  | 43183106 GOLGA2P4    |
| ENSG00000229621 | 0           | 0.390640832 | lincRNA            | 2  | 21910306  | 21933495             |
| ENSG00000229622 | 0           | 0.697730409 | pseudogene         | 13 | 96344792  | 96346226 MTND5P2     |
| ENSG00000229623 | 0.499066092 | 0.390640832 | pseudogene         | 21 | 40607312  | 40607946 METTL21AP1  |
| ENSG00000229626 | 0.499066092 | 0           | pseudogene         | 7  | 107449179 | 107450013            |
| ENSG00000229628 | 0.499066092 | 0           | lincRNA            | 7  | 46030504  | 46040497             |
| ENSG00000229635 | 0           | 0.390640832 | pseudogene         | 1  | 93850044  | 93850555             |
| ENSG00000229638 | 3.78787645  | 3.608232228 | pseudogene         | 3  | 185135283 | 185136566            |
| ENSG00000229644 | 8.009315251 | 7.980592361 | protein_coding     | 10 | 36810649  | 36813162 NAMPTL      |
| ENSG00000229645 | 1.616589159 | 0           | lincRNA            | 14 | 95873606  | 95876427 LINC00341   |
| ENSG00000229647 | 2.10647801  | 1.518964905 | lincRNA            | 2  | 208104374 | 208110611            |
| ENSG00000229656 | 4.322773689 | 5.840125386 | lincRNA            | 10 | 33247773  | 33371030             |
| ENSG00000229659 | 5.191549282 | 6.287656023 | pseudogene         | 10 | 75182017  | 75182454             |
| ENSG00000229660 | 0.499066092 | 0           | lincRNA            | 7  | 157074230 | 157075380            |
| ENSG00000229666 | 2.10647801  | 2.039052734 | antisense          | 5  | 66297211  | 66299781 MAST4-AS1   |
| ENSG00000229670 | 0           | 0.390640832 | pseudogene         | 2  | 210043690 | 210045847 PKP4P1     |
| ENSG00000229672 | 1.799000381 | 0.390640832 | antisense          | 10 | 3793259   | 3805418              |
| ENSG00000229677 | 1.960915222 | 1.518964905 | pseudogene         | 7  | 138734202 | 138734752            |
| ENSG00000229688 | 0.499066092 | 0           | processed_transc   | 7  | 16250113  | 16310229             |
| ENSG00000229689 | 4.464551814 | 4.42790041  | protein_coding     | 2  | 96194603  | 96198143             |
| ENSG00000229691 | 1.799000381 | 1.518964905 | antisense          | 1  | 155279829 | 155280381            |
| ENSG00000229692 | 1.960915222 | 1.925536307 | sense_intronic     | 2  | 39220117  | 39220998 SOS1-IT1    |
| ENSG00000229694 | 0.499066092 | 0           | lincRNA            | 9  | 93881344  | 93945044             |
| ENSG00000229696 | 0           | 0.697730409 | pseudogene         | 13 | 42499734  | 42501485 KARSP1      |
| ENSG00000229697 | 0           | 0.950786998 | lincRNA            | 9  | 45034957  | 45047145             |
| ENSG00000229700 | 0           | 0.390640832 | pseudogene         | 6  | 20042686  | 20043171             |
| ENSG00000229702 | 0           | 0.390640832 | processed_transc X |    | 129611043 | 129658231            |
| ENSG00000229704 | 0.869158192 | 0.697730409 | pseudogene         | 3  | 184963248 | 184964229 EIF2S2P2   |
| ENSG00000229715 | 0.869158192 | 0           | pseudogene         | 13 | 32420978  | 32527609 EEF1DP3     |
| ENSG00000229716 | 0.499066092 | 0           | pseudogene         | 1  | 8891173   | 8891431              |
| ENSG00000229719 | 1.407729925 | 1.16600992  | lincRNA            | 11 | 64658898  | 64660921             |
| ENSG00000229721 | 0.869158192 | 0.950786998 | pseudogene         | 5  | 179653378 | 179654000            |
| ENSG00000229728 | 3.335220907 | 3.279072565 | antisense          | 20 | 1342266   | 1343229              |
| ENSG00000229729 | 4.962122459 | 5.137803333 | protein_coding     | 3  | 88108424  | 88188123             |
| ENSG00000229742 | 0.869158192 | 0           | pseudogene         | 1  | 224485348 | 224486302            |
| ENSG00000229750 | 0           | 0.390640832 | antisense          | 2  | 176032632 | 176033250            |
| ENSG00000229751 | 0           | 0.390640832 | antisense          | 10 | 14033815  | 14049525             |
| ENSG00000229758 | 0.869158192 | 0           | pseudogene         | 2  | 128957475 | 128957767 DYNLT3P2   |
| ENSG00000229759 | 1.16343121  | 0.950786998 | pseudogene         | 3  | 48297840  | 48298428 MRPS18AP1   |
| ENSG00000229763 | 1.16343121  | 1.16600992  | antisense          | 10 | 11495945  | 11497386             |
| ENSG00000229765 | 0.869158192 | 0.390640832 | pseudogene         | 6  | 10214083  | 10214595             |
| ENSG00000229766 | 1.616589159 | 0           | processed_transc   | 20 | 8000549   | 8008603              |
| ENSG00000229780 | 0.869158192 | 2.144285137 | antisense          | 1  | 154526085 | 154527493 UBE2Q1-AS1 |
| ENSG00000229782 | 0.499066092 | 1.353254395 | antisense          | 17 | 4400689   | 4402969              |
| ENSG00000229786 | 0.869158192 | 0.950786998 | pseudogene         | 1  | 26213851  | 26214101 SNRFPF2     |
| ENSG00000229789 | 2.671945279 | 2.912743273 | pseudogene         | 9  | 68726629  | 68745997             |

|                 |             |             |                  |    |           |                      |
|-----------------|-------------|-------------|------------------|----|-----------|----------------------|
| ENSG00000229793 | 3.274897671 | 3.453019579 | antisense        | 10 | 103570752 | 103571371            |
| ENSG00000229794 | 0           | 0.950786998 | pseudogene       | X  | 102061669 | 102062755            |
| ENSG00000229795 | 0.499066092 | 0           | pseudogene       | 1  | 235596300 | 235596539            |
| ENSG00000229800 | 0.499066092 | 0           | pseudogene       | 13 | 33051411  | 33052978 ATP8A2P2    |
| ENSG00000229801 | 0.499066092 | 2.144285137 | lincRNA          | 1  | 149590752 | 149591762            |
| ENSG00000229806 | 1.960915222 | 2.501982735 | pseudogene       | 3  | 54660242  | 54660673 RPS15P5     |
| ENSG00000229808 | 3.274897671 | 2.501982735 | pseudogene       | 1  | 161860623 | 161861986            |
| ENSG00000229809 | 6.710639711 | 6.948652068 | protein_coding   | 16 | 30580667  | 30584055 ZNF688      |
| ENSG00000229813 | 1.16343121  | 0.697730409 | lincRNA          | 1  | 2357419   | 2362089              |
| ENSG00000229816 | 1.960915222 | 2.652276565 | pseudogene       | 2  | 32426669  | 32429068 DDX50P1     |
| ENSG00000229820 | 0           | 0.697730409 | pseudogene       | 1  | 28780031  | 28780444             |
| ENSG00000229821 | 0.869158192 | 0           | antisense        | 1  | 201191241 | 201192251            |
| ENSG00000229827 | 0.499066092 | 0.697730409 | pseudogene       | 2  | 170433881 | 170434256            |
| ENSG00000229828 | 0.499066092 | 0.697730409 | pseudogene       | 1  | 146011091 | 146025308            |
| ENSG00000229832 | 0           | 0.697730409 | antisense        | 1  | 212530760 | 212531695            |
| ENSG00000229833 | 7.04456449  | 8.0397549   | protein_coding   | 19 | 7694671   | 7696509 C19orf79     |
| ENSG00000229835 | 0.869158192 | 1.353254395 | pseudogene       | 9  | 21695175  | 21696948 KHSRPP1     |
| ENSG00000229839 | 0           | 1.16600992  | antisense        | 2  | 62296582  | 62374016             |
| ENSG00000229841 | 2.35979773  | 3.32456471  | antisense        | 1  | 217665317 | 217667625            |
| ENSG00000229848 | 1.407729925 | 0.950786998 | antisense        | 17 | 79481073  | 79494802             |
| ENSG00000229850 | 0           | 0.950786998 | sense_intronic   | 9  | 127431666 | 127432491            |
| ENSG00000229852 | 4.381167248 | 4.17820932  | processed_transc | 6  | 73972938  | 74011124             |
| ENSG00000229853 | 1.960915222 | 1.353254395 | pseudogene       | 20 | 46259010  | 46260182             |
| ENSG00000229862 | 0           | 0.697730409 | antisense        | 6  | 74233341  | 74280319             |
| ENSG00000229863 | 0           | 0.390640832 | pseudogene       | 3  | 57168170  | 57168751             |
| ENSG00000229867 | 2.238690726 | 2.242360793 | antisense        | 2  | 120001998 | 120006647 STEAP3-AS1 |
| ENSG00000229869 | 1.799000381 | 1.518964905 | antisense        | 10 | 978966    | 988683               |
| ENSG00000229870 | 0.869158192 | 0           | pseudogene       | 10 | 51023142  | 51023608             |
| ENSG00000229871 | 0           | 0.390640832 | pseudogene       | 1  | 56673239  | 56674128             |
| ENSG00000229873 | 2.671945279 | 3.027231696 | antisense        | 20 | 61431979  | 61436939             |
| ENSG00000229874 | 1.407729925 | 2.144285137 | antisense        | 1  | 206135293 | 206137828            |
| ENSG00000229878 | 0           | 0.390640832 | pseudogene       | 10 | 33324397  | 33324592             |
| ENSG00000229880 | 0           | 0.390640832 | pseudogene       | 21 | 46095785  | 46098003 IMMTP1      |
| ENSG00000229886 | 0.499066092 | 0           | pseudogene       | 7  | 65490113  | 65496531             |
| ENSG00000229887 | 0.499066092 | 0.390640832 | pseudogene       | 1  | 58513847  | 58514963 HNRNPA1P6   |
| ENSG00000229891 | 5.848544806 | 6.2290532   | lincRNA          | 22 | 42760406  | 42765242             |
| ENSG00000229893 | 0           | 0.390640832 | antisense        | 7  | 27773014  | 27780014             |
| ENSG00000229894 | 0           | 0.950786998 | pseudogene       | 4  | 166198944 | 166201175 GK3P       |
| ENSG00000229895 | 0.869158192 | 1.353254395 | antisense        | 1  | 116916755 | 116917283            |
| ENSG00000229896 | 1.616589159 | 1.353254395 | processed_transc | 6  | 12007903  | 12009089             |
| ENSG00000229897 | 0.499066092 | 0.950786998 | pseudogene       | 9  | 101369275 | 101370411 SEPT7P7    |
| ENSG00000229901 | 0           | 1.667587519 | antisense        | 1  | 41840676  | 41841341             |
| ENSG00000229905 | 0           | 0.950786998 | lincRNA          | 1  | 696291    | 697369               |
| ENSG00000229910 | 0.499066092 | 0           | pseudogene       | 13 | 68875737  | 68877434 HNRNPA1P18  |
| ENSG00000229912 | 0.869158192 | 1.518964905 | lincRNA          | 3  | 197177198 | 197183525            |
| ENSG00000229914 | 0.499066092 | 0.390640832 | pseudogene       | 1  | 158165423 | 158165921            |
| ENSG00000229915 | 2.238690726 | 0.390640832 | antisense        | 2  | 239335718 | 239336370            |
| ENSG00000229917 | 0           | 0.390640832 | pseudogene       | 16 | 11120881  | 11121618             |
| ENSG00000229918 | 0.499066092 | 0.697730409 | antisense        | 13 | 99484338  | 99486883 DOCK9-AS1   |
| ENSG00000229920 | 0.499066092 | 0.697730409 | pseudogene       | 2  | 63869589  | 63871172             |
| ENSG00000229921 | 3.004694206 | 0.697730409 | lincRNA          | 6  | 168393502 | 168397757 KIF25-AS1  |
| ENSG00000229926 | 1.16343121  | 0.950786998 | pseudogene       | 9  | 141031547 | 141038316            |
| ENSG00000229927 | 1.799000381 | 1.518964905 | pseudogene       | 10 | 46914088  | 46914795             |
| ENSG00000229931 | 3.989024711 | 3.845183986 | antisense        | 6  | 16761369  | 16762883             |
| ENSG00000229932 | 1.407729925 | 0.950786998 | pseudogene       | 10 | 23425852  | 23426590 YWHAZP3     |
| ENSG00000229939 | 3.393122761 | 4.17820932  | pseudogene       | X  | 110862036 | 110862322            |
| ENSG00000229941 | 0           | 0.390640832 | antisense        | 2  | 178563157 | 178588017            |
| ENSG00000229944 | 1.407729925 | 1.925536307 | pseudogene       | 17 | 47500970  | 47502298             |
| ENSG00000229947 | 0.499066092 | 0.390640832 | pseudogene       | 17 | 79480089  | 79480210             |
| ENSG00000229948 | 0           | 0.390640832 | pseudogene       | 2  | 69824485  | 69826081             |
| ENSG00000229950 | 2.671945279 | 3.368666104 | antisense        | 6  | 10409573  | 10416679             |
| ENSG00000229951 | 2.57521082  | 2.652276565 | processed_transc | 2  | 28607276  | 28617539             |
| ENSG00000229953 | 4.800350936 | 5.47691899  | antisense        | 1  | 156616299 | 156631216            |



|                 |             |             |                  |    |           |           |            |
|-----------------|-------------|-------------|------------------|----|-----------|-----------|------------|
| ENSG00000229954 | 1.16343121  | 0.697730409 | pseudogene       | X  | 102041741 | 102043315 | MTND2P2    |
| ENSG00000229955 | 0.499066092 | 0.390640832 | processed_transc | 22 | 38783923  | 38784862  |            |
| ENSG00000229956 | 0.499066092 | 0.697730409 | processed_transc | 1  | 71547007  | 71733913  | ZRANB2-AS2 |
| ENSG00000229964 | 2.10647801  | 1.518964905 | lincRNA          | 3  | 193809350 | 193826963 |            |
| ENSG00000229965 | 0           | 0.390640832 | pseudogene       | 1  | 226626265 | 226627045 |            |
| ENSG00000229970 | 3.830412367 | 2.501982735 | processed_transc | 7  | 8301894   | 8384146   |            |
| ENSG00000229972 | 0           | 0.390640832 | protein_coding   | 3  | 51851620  | 51864876  | IQCF3      |
| ENSG00000229980 | 1.616589159 | 1.16600992  | processed_transc | 17 | 48944040  | 48987098  |            |
| ENSG00000229983 | 0.499066092 | 0.390640832 | lincRNA          | 1  | 212341549 | 212363601 |            |
| ENSG00000229986 | 0           | 0.390640832 | lincRNA          | 21 | 40218171  | 40220568  |            |
| ENSG00000229989 | 0.499066092 | 0.697730409 | processed_transc | 1  | 198776622 | 198906558 |            |
| ENSG00000229990 | 0.869158192 | 0.390640832 | antisense        | 10 | 75601591  | 75606370  |            |
| ENSG00000229991 | 0.869158192 | 0.697730409 | pseudogene       | 1  | 224762136 | 224763091 | AKR1B1P1   |
| ENSG00000229992 | 0.869158192 | 1.16600992  | pseudogene       | 1  | 93112605  | 93113187  | HMG3P9     |
| ENSG00000229994 | 0.499066092 | 0.950786998 | pseudogene       | 1  | 35816323  | 35817208  |            |
| ENSG00000229996 | 1.16343121  | 0           | antisense        | 2  | 241949462 | 241950161 |            |
| ENSG00000229999 | 1.16343121  | 0.390640832 | antisense        | 22 | 40768668  | 40784294  |            |
| ENSG00000230001 | 0.499066092 | 0.390640832 | sense_intronic   | 9  | 4070906   | 4071884   |            |
| ENSG00000230002 | 2.762599152 | 2.579085888 | sense_intronic   | 2  | 73684230  | 73686609  | ALMS1-IT1  |
| ENSG00000230005 | 0.499066092 | 0.697730409 | sense_intronic   | 1  | 227931532 | 227934892 | SNAP47-IT1 |
| ENSG00000230006 | 1.407729925 | 1.667587519 | processed_transc | 2  | 89065324  | 89106126  | ANKRD36BP2 |
| ENSG00000230010 | 0.499066092 | 0.697730409 | lincRNA          | 20 | 18303196  | 18339944  |            |
| ENSG00000230013 | 0.499066092 | 0.390640832 | lincRNA          | 9  | 107753077 | 107754062 |            |
| ENSG00000230015 | 0           | 0.390640832 | lincRNA          | 1  | 240902729 | 240906911 |            |
| ENSG00000230021 | 0.869158192 | 1.353254395 | processed_transc | 1  | 536816    | 659930    |            |
| ENSG00000230022 | 0.869158192 | 0.390640832 | pseudogene       | 13 | 22104829  | 22105462  | FNTAP2     |
| ENSG00000230024 | 0           | 0.950786998 | lincRNA          | 1  | 219608494 | 219615984 |            |
| ENSG00000230026 | 0.499066092 | 0.390640832 | pseudogene       | 1  | 235524468 | 235525575 |            |
| ENSG00000230037 | 1.16343121  | 2.242360793 | pseudogene       | 2  | 137087011 | 137087483 | UBBP1      |
| ENSG00000230042 | 1.799000381 | 1.16600992  | pseudogene       | 7  | 23168797  | 23169460  | AK3P3      |
| ENSG00000230046 | 0.499066092 | 1.16600992  | antisense        | 2  | 32602699  | 32604667  |            |
| ENSG00000230047 | 0.499066092 | 0           | pseudogene       | 2  | 232301812 | 232302132 |            |
| ENSG00000230051 | 0           | 0.697730409 | lincRNA          | 22 | 27727748  | 27775226  |            |
| ENSG00000230052 | 0           | 0.390640832 | pseudogene       | 7  | 63566032  | 63566373  | MTND3P2    |
| ENSG00000230054 | 1.16343121  | 1.16600992  | lincRNA          | 9  | 117418584 | 117424654 |            |
| ENSG00000230055 | 8.528449672 | 8.38930337  | protein_coding   | 17 | 36886510  | 36891858  | CISD3      |
| ENSG00000230061 | 0.499066092 | 2.242360793 | processed_transc | 21 | 45834473  | 45845155  |            |
| ENSG00000230067 | 1.407729925 | 0.390640832 | pseudogene       | 3  | 36808608  | 36810290  | HSPD1P6    |
| ENSG00000230068 | 0           | 1.667587519 | sense_intronic   | 1  | 22385690  | 22390692  | CDC42-IT1  |
| ENSG00000230069 | 3.211941663 | 2.851901313 | pseudogene       | 4  | 103648431 | 103651878 |            |
| ENSG00000230071 | 3.146112541 | 3.493416095 | pseudogene       | 22 | 40982710  | 40984007  |            |
| ENSG00000230074 | 3.744048221 | 3.87606762  | antisense        | 9  | 34665662  | 34681295  |            |
| ENSG00000230076 | 0.499066092 | 1.925536307 | pseudogene       | 2  | 215711852 | 215712169 |            |
| ENSG00000230077 | 1.799000381 | 0.697730409 | pseudogene       | 3  | 189686819 | 189687650 | MTAPP2     |
| ENSG00000230081 | 0           | 0.390640832 | pseudogene       | 9  | 115043258 | 115043692 |            |
| ENSG00000230082 | 3.830412367 | 3.570966319 | antisense        | 3  | 9989088   | 9996471   | PRRT3-AS1  |
| ENSG00000230084 | 1.799000381 | 1.802319292 | antisense        | 3  | 42643455  | 42695880  |            |
| ENSG00000230090 | 0           | 0.390640832 | antisense        | 2  | 5758459   | 5831250   |            |
| ENSG00000230091 | 2.57521082  | 3.368666104 | processed_transc | 10 | 81806616  | 81838668  |            |
| ENSG00000230092 | 0.499066092 | 1.518964905 | lincRNA          | 1  | 736259    | 745541    |            |
| ENSG00000230097 | 0           | 0.390640832 | pseudogene       | 9  | 29824756  | 29826709  |            |
| ENSG00000230098 | 0.499066092 | 0           | antisense        | 10 | 132893481 | 132894040 |            |
| ENSG00000230102 | 0.869158192 | 0.950786998 | processed_transc | 3  | 193723245 | 193788759 |            |
| ENSG00000230105 | 0           | 0.697730409 | lincRNA          | X  | 56644824  | 56650891  |            |
| ENSG00000230107 | 2.35979773  | 3.493416095 | lincRNA          | 22 | 42834029  | 42842201  |            |
| ENSG00000230109 | 1.799000381 | 2.851901313 | lincRNA          | 10 | 21629162  | 21661879  |            |
| ENSG00000230110 | 0           | 0.697730409 | pseudogene       | 7  | 101804400 | 101804617 |            |
| ENSG00000230124 | 4.689181911 | 5.259915406 | antisense        | 1  | 180238788 | 180245359 |            |
| ENSG00000230125 | 0           | 0.697730409 | pseudogene       | 10 | 30590752  | 30591001  | EEF1A1P39  |
| ENSG00000230131 | 1.16343121  | 1.518964905 | lincRNA          | 10 | 125115966 | 125277224 |            |
| ENSG00000230133 | 0           | 0.390640832 | lincRNA          | 20 | 24180403  | 24205224  |            |
| ENSG00000230140 | 0.499066092 | 0.390640832 | antisense        | 2  | 101589110 | 101593623 |            |
| ENSG00000230146 | 1.616589159 | 0.390640832 | pseudogene       | X  | 72989083  | 72990258  | SEPHS1P4   |

|                 |             |             |                  |    |           |           |             |
|-----------------|-------------|-------------|------------------|----|-----------|-----------|-------------|
| ENSG00000230147 | 0.499066092 | 0           | pseudogene       | 9  | 93931863  | 93932327  |             |
| ENSG00000230149 | 2.57521082  | 2.851901313 | processed_transc | 22 | 39130735  | 39134995  |             |
| ENSG00000230154 | 0           | 0.390640832 | pseudogene       | 2  | 11448151  | 11449067  |             |
| ENSG00000230155 | 1.16343121  | 0.950786998 | antisense        | 20 | 34064028  | 34078808  |             |
| ENSG00000230162 | 0           | 0.950786998 | pseudogene       | X  | 135024637 | 135029298 |             |
| ENSG00000230163 | 3.871730003 | 3.935919592 | antisense        | 1  | 35316295  | 35317156  |             |
| ENSG00000230166 | 0           | 0.390640832 | pseudogene       | 10 | 51117659  | 51117988  |             |
| ENSG00000230170 | 0.499066092 | 0           | pseudogene       | X  | 118354745 | 118355705 | HNRNPA1P28  |
| ENSG00000230174 | 0.499066092 | 0           | lincRNA          | 6  | 31409444  | 31414750  |             |
| ENSG00000230175 | 0           | 0.697730409 | pseudogene       | 1  | 165640493 | 165640962 |             |
| ENSG00000230176 | 2.238690726 | 1.925536307 | antisense        | 20 | 4173714   | 4176375   |             |
| ENSG00000230177 | 2.471521042 | 2.788380093 | antisense        | 6  | 111599135 | 111599945 |             |
| ENSG00000230183 | 0.869158192 | 1.16600992  | pseudogene       | 15 | 56297911  | 56299374  |             |
| ENSG00000230184 | 0           | 0.697730409 | sense_intronic   | 1  | 246484965 | 246485740 | SMYD3-IT1   |
| ENSG00000230185 | 2.10647801  | 1.667587519 | protein_coding   | 9  | 115246722 | 115249484 | C9orf147    |
| ENSG00000230186 | 1.16343121  | 0.697730409 | antisense        | 1  | 149400063 | 149429580 |             |
| ENSG00000230188 | 0.499066092 | 1.16600992  | pseudogene       | 9  | 37490418  | 37490890  |             |
| ENSG00000230189 | 4.19837882  | 3.32456471  | pseudogene       | 7  | 65874130  | 65955046  |             |
| ENSG00000230191 | 1.799000381 | 0.697730409 | pseudogene       | 7  | 56230838  | 56231226  |             |
| ENSG00000230194 | 0           | 0.390640832 | pseudogene       | 22 | 19225966  | 19226262  |             |
| ENSG00000230196 | 0           | 1.16600992  | pseudogene       | 7  | 81240200  | 81240642  |             |
| ENSG00000230200 | 1.407729925 | 1.802319292 | processed_transc | 9  | 138356344 | 138356726 |             |
| ENSG00000230201 | 0.869158192 | 1.353254395 | pseudogene       | 17 | 4760052   | 4760669   | ATP6V0CP1   |
| ENSG00000230202 | 5.899377978 | 6.733635362 | pseudogene       | 6  | 118320138 | 118320611 |             |
| ENSG00000230204 | 1.16343121  | 1.353254395 | pseudogene       | 6  | 50880425  | 50880969  | FTH1P5      |
| ENSG00000230207 | 2.671945279 | 2.579085888 | pseudogene       | 9  | 7477045   | 7478320   |             |
| ENSG00000230212 | 0.869158192 | 0.697730409 | processed_transc | 21 | 37441940  | 37498938  |             |
| ENSG00000230216 | 0.869158192 | 1.518964905 | pseudogene       | X  | 49090415  | 49090960  | HSPB1P2     |
| ENSG00000230221 | 0           | 0.390640832 | pseudogene       | 9  | 98055086  | 98057088  |             |
| ENSG00000230224 | 3.652182994 | 4.15321211  | pseudogene       | 10 | 102008028 | 102008852 | PHBP9       |
| ENSG00000230243 | 0           | 0.390640832 | pseudogene       | 13 | 47079253  | 47079571  | FKBP1AP3    |
| ENSG00000230251 | 0           | 0.390640832 | pseudogene       | 2  | 155143102 | 155143938 | PHBP4       |
| ENSG00000230252 | 0           | 0.390640832 | pseudogene       | 7  | 63570925  | 63571928  | MTND2P4     |
| ENSG00000230253 | 0.499066092 | 0.390640832 | pseudogene       | 9  | 68410687  | 68412235  |             |
| ENSG00000230255 | 0           | 0.697730409 | pseudogene       | 1  | 142791488 | 142792556 |             |
| ENSG00000230257 | 7.427149666 | 6.862599506 | processed_transc | 7  | 102613969 | 102629303 |             |
| ENSG00000230262 | 4.618121645 | 4.250702764 | lincRNA          | 9  | 96938884  | 96966818  | MIRLET7DHG  |
| ENSG00000230266 | 0           | 0.390640832 | antisense        | 3  | 194868600 | 194873519 |             |
| ENSG00000230267 | 0           | 1.16600992  | pseudogene       | 16 | 32163040  | 32199434  | HERC2P4     |
| ENSG00000230272 | 0           | 1.518964905 | antisense        | 1  | 51731525  | 51732716  |             |
| ENSG00000230274 | 0.499066092 | 0           | pseudogene       | 3  | 40364206  | 40364770  | PGAM1P3     |
| ENSG00000230280 | 0.869158192 | 2.334191469 | pseudogene       | 1  | 202880940 | 202881859 |             |
| ENSG00000230285 | 0           | 0.950786998 | lincRNA          | 1  | 86064814  | 86066417  |             |
| ENSG00000230288 | 0.499066092 | 0.390640832 | lincRNA          | 15 | 45671395  | 45694525  |             |
| ENSG00000230289 | 1.616589159 | 0.950786998 | antisense        | 9  | 134391945 | 134397616 |             |
| ENSG00000230290 | 0           | 0.390640832 | antisense        | 6  | 109244179 | 109245306 |             |
| ENSG00000230291 | 1.799000381 | 2.579085888 | pseudogene       | 12 | 80496679  | 80497113  |             |
| ENSG00000230295 | 2.57521082  | 2.039052734 | pseudogene       | 7  | 66345695  | 66347968  |             |
| ENSG00000230299 | 0           | 0.390640832 | pseudogene       | 2  | 85489267  | 85489390  |             |
| ENSG00000230300 | 0.499066092 | 0           | sense_intronic   | 13 | 33732724  | 33738546  | STARD13-IT1 |
| ENSG00000230303 | 0           | 0.390640832 | lincRNA          | 9  | 88400637  | 88408395  |             |
| ENSG00000230305 | 0           | 0.697730409 | pseudogene       | 7  | 76153832  | 76162009  |             |
| ENSG00000230306 | 2.847891871 | 2.334191469 | pseudogene       | 10 | 135158147 | 135158410 |             |
| ENSG00000230309 | 0           | 0.950786998 | lincRNA          | 6  | 79314184  | 79315753  |             |
| ENSG00000230310 | 0           | 1.16600992  | antisense        | 19 | 12663411  | 12664458  |             |
| ENSG00000230311 | 0           | 0.390640832 | pseudogene       | X  | 72442960  | 72443397  |             |
| ENSG00000230318 | 0.499066092 | 0.390640832 | pseudogene       | 1  | 220487324 | 220489045 |             |
| ENSG00000230319 | 0.499066092 | 0.950786998 | antisense        | 22 | 43434591  | 43448372  |             |
| ENSG00000230321 | 1.960915222 | 1.802319292 | pseudogene       | 19 | 12615719  | 12616790  |             |
| ENSG00000230325 | 0.869158192 | 1.16600992  | processed_transc | 1  | 236703394 | 236713580 |             |
| ENSG00000230326 | 0           | 0.390640832 | pseudogene       | X  | 9833133   | 9833583   | HMG1P33     |
| ENSG00000230330 | 0           | 0.390640832 | pseudogene       | 16 | 26043860  | 26044132  | HMG2P3      |
| ENSG00000230337 | 2.10647801  | 3.081239798 | antisense        | 1  | 11159732  | 11162157  |             |

|                 |             |             |                  |    |           |           |            |
|-----------------|-------------|-------------|------------------|----|-----------|-----------|------------|
| ENSG00000230338 | 0           | 0.390640832 | pseudogene       | 10 | 96533913  | 96534390  | MTND4P19   |
| ENSG00000230345 | 0           | 0.390640832 | lincRNA          | 22 | 48256420  | 48257811  |            |
| ENSG00000230355 | 0.499066092 | 0.390640832 | pseudogene       | 2  | 67108219  | 67108354  |            |
| ENSG00000230358 | 0.869158192 | 1.16600992  | pseudogene       | 7  | 66744765  | 66751606  |            |
| ENSG00000230359 | 1.616589159 | 2.144285137 | pseudogene       | 7  | 128696073 | 128696824 | TPI1P2     |
| ENSG00000230360 | 2.471521042 | 2.039052734 | pseudogene       | 9  | 84701070  | 84703683  |            |
| ENSG00000230362 | 0.499066092 | 1.16600992  | pseudogene       | 3  | 175695285 | 175696358 |            |
| ENSG00000230364 | 1.799000381 | 1.802319292 | pseudogene       | 1  | 171652268 | 171653578 |            |
| ENSG00000230366 | 1.407729925 | 2.144285137 | processed_transc | 21 | 38580804  | 38594041  | DSCR9      |
| ENSG00000230368 | 1.16343121  | 2.039052734 | lincRNA          | 1  | 803451    | 812283    | FAM41C     |
| ENSG00000230370 | 0           | 0.697730409 | pseudogene       | 7  | 11046026  | 11046503  |            |
| ENSG00000230373 | 3.211941663 | 2.851901313 | pseudogene       | 15 | 85051116  | 85060045  | GOLGA6L5   |
| ENSG00000230381 | 0.499066092 | 0.697730409 | processed_transc | 1  | 116971673 | 117105789 |            |
| ENSG00000230383 | 1.407729925 | 0.697730409 | pseudogene       | 7  | 137406731 | 137407592 |            |
| ENSG00000230392 | 0.499066092 | 0           | lincRNA          | X  | 118425492 | 118469573 |            |
| ENSG00000230394 | 0           | 0.390640832 | lincRNA          | X  | 7975419   | 7986201   |            |
| ENSG00000230396 | 1.16343121  | 0.390640832 | sense_intronic   | 9  | 127885377 | 127886583 |            |
| ENSG00000230397 | 0           | 1.353254395 | pseudogene       | 10 | 31649884  | 31650144  | SPTLC1P1   |
| ENSG00000230399 | 0           | 0.390640832 | pseudogene       | X  | 117766338 | 117768181 | RBBP8P1    |
| ENSG00000230400 | 0           | 0.390640832 | lincRNA          | 20 | 22656710  | 22665982  |            |
| ENSG00000230402 | 0           | 0.697730409 | lincRNA          | 1  | 101092605 | 101094500 |            |
| ENSG00000230406 | 0           | 0.390640832 | pseudogene       | 2  | 222457161 | 222457581 |            |
| ENSG00000230408 | 0.869158192 | 0.390640832 | antisense        | 2  | 201645218 | 201676893 |            |
| ENSG00000230409 | 1.16343121  | 1.353254395 | pseudogene       | 3  | 37317087  | 37318089  | TCEA1P2    |
| ENSG00000230415 | 0           | 1.16600992  | processed_transc | 1  | 1210603   | 1215800   |            |
| ENSG00000230417 | 0           | 0.390640832 | processed_transc | 10 | 80008497  | 80434724  |            |
| ENSG00000230424 | 0.499066092 | 0.950786998 | antisense        | 1  | 19536995  | 19567198  |            |
| ENSG00000230426 | 0.499066092 | 0           | lincRNA          | 1  | 187610358 | 187612992 | ERVMER61-1 |
| ENSG00000230427 | 0           | 0.390640832 | antisense        | 1  | 95527152  | 95533101  |            |
| ENSG00000230428 | 0           | 0.390640832 | pseudogene       | 16 | 501404    | 503461    |            |
| ENSG00000230432 | 0           | 0.390640832 | antisense        | 2  | 220163724 | 220168852 |            |
| ENSG00000230433 | 0.869158192 | 0.950786998 | antisense        | 6  | 524171    | 525581    |            |
| ENSG00000230438 | 2.10647801  | 1.16600992  | lincRNA          | 6  | 2854891   | 2876744   |            |
| ENSG00000230439 | 4.517578978 | 3.232099092 | processed_transc | 1  | 94218480  | 94241000  |            |
| ENSG00000230444 | 1.16343121  | 0.697730409 | pseudogene       | 7  | 1654226   | 1654961   | TFAMP1     |
| ENSG00000230445 | 3.335220907 | 3.748356452 | pseudogene       | 10 | 27535279  | 27540722  |            |
| ENSG00000230446 | 0.499066092 | 0           | pseudogene       | 1  | 142790233 | 142790520 |            |
| ENSG00000230447 | 0           | 0.697730409 | pseudogene       | 16 | 30915669  | 30921529  | CTF2P      |
| ENSG00000230449 | 0.499066092 | 1.518964905 | pseudogene       | 6  | 30664583  | 30665312  | RPL7P4     |
| ENSG00000230450 | 0.869158192 | 1.16600992  | pseudogene       | 2  | 131935191 | 131936519 | NEK2P4     |
| ENSG00000230453 | 3.950976309 | 3.64455972  | protein_coding   | 9  | 33524392  | 33573007  | ANKRD18B   |
| ENSG00000230454 | 2.35979773  | 2.652276565 | processed_transc | 3  | 50297735  | 50300790  |            |
| ENSG00000230457 | 3.502389126 | 3.232099092 | pseudogene       | 3  | 156527340 | 156528521 | PA2G4P4    |
| ENSG00000230479 | 3.211941663 | 4.585695337 | antisense        | 21 | 37802658  | 37853368  |            |
| ENSG00000230480 | 0           | 0.697730409 | pseudogene       | 3  | 28489216  | 28489564  |            |
| ENSG00000230482 | 0           | 0.390640832 | pseudogene       | 2  | 198127835 | 198128259 | ATP5G2P3   |
| ENSG00000230487 | 6.658471572 | 6.192713747 | processed_transc | 7  | 1609709   | 1629262   |            |
| ENSG00000230494 | 0.499066092 | 0.390640832 | sense_intronic   | 9  | 112202342 | 112203532 |            |
| ENSG00000230495 | 0.499066092 | 0           | pseudogene       | 20 | 17579900  | 17580452  |            |
| ENSG00000230499 | 2.35979773  | 2.039052734 | lincRNA          | 2  | 111953540 | 111964071 |            |
| ENSG00000230508 | 1.16343121  | 1.667587519 | pseudogene       | X  | 150161974 | 150162564 | RPL19P21   |
| ENSG00000230510 | 1.960915222 | 2.912743273 | protein_coding   | 19 | 47021936  | 47104457  |            |
| ENSG00000230513 | 4.734682531 | 4.826083323 | antisense        | 22 | 21356175  | 21364631  | THAP7-AS1  |
| ENSG00000230519 | 0.499066092 | 0.390640832 | pseudogene       | 12 | 27855271  | 27855839  |            |
| ENSG00000230521 | 2.471521042 | 2.912743273 | pseudogene       | 6  | 29855071  | 29856045  | HCG4P7     |
| ENSG00000230523 | 0           | 0.390640832 | processed_transc | 1  | 29656132  | 29676626  |            |
| ENSG00000230524 | 2.35979773  | 2.039052734 | pseudogene       | 3  | 15193340  | 15247466  | COL6A4P1   |
| ENSG00000230526 | 0           | 0.950786998 | lincRNA          | 10 | 73638114  | 73638865  |            |
| ENSG00000230528 | 0           | 0.950786998 | processed_transc | 17 | 20340137  | 20350557  |            |
| ENSG00000230530 | 1.16343121  | 1.16600992  | processed_transc | 3  | 45720535  | 45730626  |            |
| ENSG00000230534 | 0.869158192 | 1.353254395 | antisense        | 10 | 35386934  | 35415948  |            |
| ENSG00000230536 | 0.499066092 | 0.950786998 | antisense        | 9  | 130853248 | 130856736 |            |
| ENSG00000230537 | 1.616589159 | 1.667587519 | lincRNA          | 9  | 93867239  | 93869586  |            |

|                 |             |             |                    |    |           |           |           |
|-----------------|-------------|-------------|--------------------|----|-----------|-----------|-----------|
| ENSG00000230539 | 1.16343121  |             | 0 sense_intronic   | 7  | 36637440  | 36639726  | AOAH-IT1  |
| ENSG00000230542 | 0.499066092 | 0.390640832 | lincRNA            | X  | 2531029   | 2533388   | LINC00102 |
| ENSG00000230547 | 0           | 0.390640832 | pseudogene         | 1  | 171240093 | 171240729 | HMGB1P11  |
| ENSG00000230550 | 0.869158192 |             | 0 antisense        | 1  | 204110536 | 204112137 |           |
| ENSG00000230551 | 7.19863491  | 6.889336956 | processed_transc   | 5  | 148872949 | 148884233 |           |
| ENSG00000230554 | 0           | 0.390640832 | sense_intronic     | 6  | 45227825  | 45228305  |           |
| ENSG00000230555 | 1.960915222 | 2.912743273 | lincRNA            | 10 | 43916047  | 43917254  |           |
| ENSG00000230558 | 0.869158192 | 0.390640832 | pseudogene         | 19 | 43057636  | 43065909  | CEACAMP2  |
| ENSG00000230561 | 1.16343121  | 1.353254395 | lincRNA            | 5  | 127039082 | 127277326 |           |
| ENSG00000230565 | 2.238690726 | 1.802319292 | antisense          | 10 | 44141390  | 44143467  | ZNF32-AS2 |
| ENSG00000230568 | 0.869158192 | 1.667587519 | pseudogene         | 20 | 3470176   | 3471652   | SF3A3P1   |
| ENSG00000230569 | 0.869158192 | 0.390640832 | lincRNA            | 2  | 139228226 | 139231502 |           |
| ENSG00000230573 | 0           | 0.390640832 | lincRNA            | 10 | 3876142   | 3876920   |           |
| ENSG00000230580 | 1.16343121  | 1.16600992  | pseudogene         | 2  | 219218798 | 219219295 |           |
| ENSG00000230581 | 2.10647801  | 2.579085888 | pseudogene         | 9  | 6834386   | 6835577   |           |
| ENSG00000230583 | 0.869158192 | 0.390640832 | pseudogene         | 7  | 66274980  | 66309813  |           |
| ENSG00000230584 | 4.437288965 | 3.532712221 | pseudogene         | 13 | 79483054  | 79484677  | CCT5P2    |
| ENSG00000230585 | 0.869158192 | 0.697730409 | pseudogene         | 1  | 51246011  | 51246818  | PHBP12    |
| ENSG00000230590 | 5.431503808 | 5.466810074 | processed_transc   | X  | 73467699  | 73513362  | FTX       |
| ENSG00000230592 | 1.16343121  | 1.353254395 | pseudogene         | X  | 99410881  | 99411772  | RPSAP8    |
| ENSG00000230601 | 0.869158192 | 2.144285137 | lincRNA            | 9  | 117428716 | 117434029 |           |
| ENSG00000230604 | 0.499066092 |             | 0 pseudogene       | 1  | 52325449  | 52325804  |           |
| ENSG00000230606 | 6.687686437 | 7.228408053 | processed_transc   | 2  | 98081683  | 98091049  |           |
| ENSG00000230609 | 0           | 0.390640832 | pseudogene         | 10 | 74320022  | 74320214  |           |
| ENSG00000230612 | 1.799000381 | 1.353254395 | antisense          | 5  | 132024373 | 132057275 |           |
| ENSG00000230613 | 1.407729925 | 1.353254395 | antisense          | 20 | 30155510  | 30161066  | HM13-AS1  |
| ENSG00000230615 | 6.535310252 | 7.148445524 | processed_transc   | 1  | 44509600  | 44570647  |           |
| ENSG00000230620 | 1.16343121  | 0.697730409 | antisense          | 10 | 71968555  | 71969331  |           |
| ENSG00000230623 | 0           | 0.390640832 | lincRNA            | 1  | 200443048 | 200447421 |           |
| ENSG00000230625 | 0.869158192 | 0.697730409 | sense_intronic     | 13 | 20651665  | 20653696  | ZMYM2-IT1 |
| ENSG00000230626 | 3.502389126 | 3.279072565 | pseudogene         | 7  | 128766572 | 128770847 |           |
| ENSG00000230629 | 2.238690726 | 2.334191469 | pseudogene         | X  | 70182814  | 70183140  | RPS23P8   |
| ENSG00000230634 | 0.499066092 |             | 0 pseudogene       | 22 | 46877226  | 46877657  |           |
| ENSG00000230635 | 0.499066092 |             | 0 pseudogene       | 9  | 44019596  | 44020591  | CYP4F60P  |
| ENSG00000230637 | 1.16343121  | 0.950786998 | pseudogene         | 22 | 25723219  | 25735942  |           |
| ENSG00000230638 | 3.077135474 | 1.925536307 | pseudogene         | 1  | 42007739  | 42010258  |           |
| ENSG00000230641 | 0.869158192 |             | 0 antisense        | 13 | 27746396  | 27757135  | USP12-AS2 |
| ENSG00000230647 | 2.35979773  | 2.420525079 | lincRNA            | 17 | 14277456  | 14324343  |           |
| ENSG00000230648 | 0           | 0.390640832 | antisense          | 6  | 4019077   | 4021449   |           |
| ENSG00000230650 | 4.981125677 | 4.274079748 | pseudogene         | 2  | 111118185 | 111121314 |           |
| ENSG00000230655 | 0.499066092 |             | 0 pseudogene       | 3  | 75419599  | 75420493  |           |
| ENSG00000230657 | 0.869158192 | 0.390640832 | protein_coding     | 12 | 11460017  | 11463369  | PRB4      |
| ENSG00000230658 | 3.502389126 | 3.133298822 | processed_transc   | 7  | 23140847  | 23145322  | KLHL7-AS1 |
| ENSG00000230659 | 0           | 1.353254395 | pseudogene         | 1  | 165788590 | 165789024 |           |
| ENSG00000230665 | 0           | 0.697730409 | pseudogene         | X  | 73616704  | 73619385  | PRKRIRP1  |
| ENSG00000230666 | 4.261916566 | 2.334191469 | pseudogene         | 19 | 45041045  | 45124119  | CEACAM22P |
| ENSG00000230667 | 0           | 1.16600992  | pseudogene         | 1  | 92540077  | 92540968  | SETP18    |
| ENSG00000230668 | 0           | 0.390640832 | antisense          | X  | 139763271 | 139769870 |           |
| ENSG00000230673 | 3.502389126 | 3.081239798 | pseudogene         | X  | 73802923  | 73803381  | PABPC1P3  |
| ENSG00000230677 | 0           | 0.390640832 | antisense          | 10 | 65035906  | 65041994  |           |
| ENSG00000230679 | 0.869158192 | 0.950786998 | antisense          | 1  | 8938894   | 8939953   | ENO1-AS1  |
| ENSG00000230683 | 0.499066092 | 0.697730409 | pseudogene         | 3  | 38556939  | 38557321  |           |
| ENSG00000230684 | 0.499066092 |             | 0 antisense        | 9  | 132695815 | 132698820 |           |
| ENSG00000230693 | 1.16343121  | 0.697730409 | pseudogene         | X  | 72744797  | 72745991  |           |
| ENSG00000230695 | 0           | 0.697730409 | antisense          | 2  | 216300976 | 216301715 |           |
| ENSG00000230696 | 0.499066092 |             | 0 processed_transc | 2  | 110352270 | 110363275 |           |
| ENSG00000230697 | 0.499066092 | 0.697730409 | pseudogene         | 3  | 20049344  | 20049739  |           |
| ENSG00000230699 | 3.502389126 | 3.64455972  | antisense          | 1  | 846815    | 850328    |           |
| ENSG00000230701 | 2.671945279 | 2.652276565 | pseudogene         | 22 | 23605323  | 23606541  | FBXW4P1   |
| ENSG00000230702 | 0           | 0.697730409 | pseudogene         | 2  | 62083830  | 62084190  |           |
| ENSG00000230709 | 0.499066092 |             | 0 processed_transc | 17 | 16879313  | 16884667  |           |
| ENSG00000230715 | 6.228441838 | 5.824376633 | pseudogene         | 7  | 128292895 | 128293719 |           |
| ENSG00000230716 | 1.16343121  | 1.518964905 | pseudogene         | 11 | 119473587 | 119475018 | KRT8P7    |

|                 |             |             |                  |    |           |                        |
|-----------------|-------------|-------------|------------------|----|-----------|------------------------|
| ENSG00000230721 | 1.407729925 | 2.420525079 | pseudogene       | 1  | 87250596  | 87251150               |
| ENSG00000230724 | 5.018397273 | 4.761389014 | processed_transc | 11 | 127115    | 139117                 |
| ENSG00000230732 | 1.407729925 | 0.950786998 | antisense        | 3  | 196640757 | 196641313              |
| ENSG00000230733 | 8.541310587 | 7.896480033 | antisense        | 7  | 5515435   | 5519442                |
| ENSG00000230734 | 8.504022011 | 9.096409785 | pseudogene       | 9  | 119942907 | 119943374 RPL10P3      |
| ENSG00000230736 | 3.146112541 | 2.721932731 | processed_transc | 22 | 32772651  | 32780330               |
| ENSG00000230739 | 0.869158192 | 0.697730409 | pseudogene       | 1  | 162794585 | 162819257              |
| ENSG00000230746 | 0.499066092 | 0           | lincRNA          | 7  | 145372975 | 145378462              |
| ENSG00000230750 | 0.499066092 | 0.697730409 | pseudogene       | 20 | 10366427  | 10368454 SDAD1P2       |
| ENSG00000230751 | 1.616589159 | 0.390640832 | sense_intronic   | 7  | 30180486  | 30181033               |
| ENSG00000230753 | 0.499066092 | 0.697730409 | antisense        | 20 | 32375179  | 32398903               |
| ENSG00000230756 | 0           | 0.697730409 | pseudogene       | 2  | 130970443 | 130971063 RHOQP3       |
| ENSG00000230758 | 0.869158192 | 0           | pseudogene       | 20 | 47654894  | 47655139 SNAP23P       |
| ENSG00000230768 | 0           | 0.390640832 | lincRNA          | 1  | 106132316 | 106161557              |
| ENSG00000230769 | 0.869158192 | 0.950786998 | pseudogene       | 22 | 41184781  | 41185271               |
| ENSG00000230772 | 2.35979773  | 2.721932731 | pseudogene       | 20 | 25714900  | 25715729 VN1R108P      |
| ENSG00000230777 | 0           | 1.518964905 | pseudogene       | 1  | 175891111 | 175891281              |
| ENSG00000230778 | 0.499066092 | 0           | protein_coding   | 15 | 40573645  | 40574787 ANKRD63       |
| ENSG00000230782 | 1.16343121  | 1.16600992  | processed_transc | 9  | 109737114 | 109865269              |
| ENSG00000230783 | 0.499066092 | 0           | pseudogene       | 2  | 160545728 | 160546802              |
| ENSG00000230786 | 1.16343121  | 2.039052734 | protein_coding   | 10 | 135380204 | 135383462              |
| ENSG00000230787 | 0           | 0.697730409 | pseudogene       | 1  | 79520630  | 79521740               |
| ENSG00000230789 | 1.16343121  | 0.697730409 | sense_intronic   | 5  | 142572065 | 142573731 ARHGAP26-IT1 |
| ENSG00000230790 | 0           | 0.697730409 | antisense        | 2  | 11881123  | 11885427               |
| ENSG00000230793 | 0.499066092 | 0.390640832 | pseudogene       | 13 | 45168994  | 45170218 SMARCE1P5     |
| ENSG00000230795 | 1.616589159 | 1.16600992  | pseudogene       | 6  | 29894236  | 29897009 HLA-K         |
| ENSG00000230797 | 4.77879189  | 5.361622823 | protein_coding   | X  | 21874105  | 21876845 YY2           |
| ENSG00000230798 | 2.238690726 | 3.935919592 | antisense        | 1  | 63786555  | 63790112               |
| ENSG00000230799 | 1.960915222 | 1.518964905 | pseudogene       | 2  | 202627460 | 202628296              |
| ENSG00000230801 | 0.869158192 | 0.697730409 | pseudogene       | 20 | 30396306  | 30396552               |
| ENSG00000230812 | 0.869158192 | 1.802319292 | lincRNA          | 1  | 59486059  | 59510286               |
| ENSG00000230813 | 0           | 0.390640832 | pseudogene       | 1  | 246690332 | 246691457              |
| ENSG00000230815 | 0.499066092 | 0.390640832 | sense_intronic   | 9  | 97586554  | 97587055               |
| ENSG00000230817 | 0.499066092 | 0.390640832 | lincRNA          | 1  | 83368866  | 83632498               |
| ENSG00000230823 | 1.407729925 | 1.16600992  | pseudogene       | X  | 62519126  | 62519552 CBX1P1        |
| ENSG00000230825 | 0.869158192 | 0.390640832 | processed_transc | 7  | 7294785   | 7317410                |
| ENSG00000230826 | 0.499066092 | 0.390640832 | antisense        | 9  | 126498716 | 126514220              |
| ENSG00000230829 | 0.499066092 | 0           | pseudogene       | 5  | 32222038  | 32222453               |
| ENSG00000230832 | 0.869158192 | 1.16600992  | pseudogene       | 1  | 146553887 | 146555127              |
| ENSG00000230834 | 1.16343121  | 0.390640832 | lincRNA          | 11 | 1798160   | 1799618                |
| ENSG00000230836 | 2.847891871 | 4.528525526 | lincRNA          | 2  | 75167385  | 75169797               |
| ENSG00000230837 | 1.16343121  | 0.950786998 | pseudogene       | 20 | 32339973  | 32340349 RPL31P2       |
| ENSG00000230839 | 0.499066092 | 1.16600992  | lincRNA          | 20 | 1784662   | 1798252                |
| ENSG00000230844 | 5.806547963 | 6.50081754  | processed_transc | X  | 46404928  | 46407671               |
| ENSG00000230849 | 3.871730003 | 4.342020395 | pseudogene       | 1  | 173110239 | 173111489 GOT2P2       |
| ENSG00000230850 | 2.35979773  | 1.925536307 | processed_transc | 1  | 143119061 | 143233417              |
| ENSG00000230860 | 0           | 0.390640832 | pseudogene       | 20 | 44196629  | 44197446 CCNB1IP1P2    |
| ENSG00000230869 | 0           | 0.390640832 | pseudogene       | 10 | 46174140  | 46195980 CTGLF10P      |
| ENSG00000230870 | 1.616589159 | 0.950786998 | pseudogene       | 21 | 32999440  | 33000913 FBXW11P1      |
| ENSG00000230872 | 2.10647801  | 2.039052734 | pseudogene       | 16 | 22393757  | 22418749               |
| ENSG00000230873 | 0           | 0.697730409 | protein_coding   | 6  | 17102489  | 17131603               |
| ENSG00000230876 | 0           | 0.390640832 | lincRNA          | 2  | 33050510  | 33151760 LINC00486     |
| ENSG00000230880 | 1.799000381 | 2.788380093 | processed_transc | 1  | 142618766 | 142729975              |
| ENSG00000230881 | 0           | 0.390640832 | antisense        | 1  | 42001114  | 42001539               |
| ENSG00000230882 | 5.485736881 | 3.714580548 | pseudogene       | 7  | 75700787  | 75704281               |
| ENSG00000230894 | 0.499066092 | 0           | antisense        | 9  | 119330728 | 119348607              |
| ENSG00000230896 | 3.004694206 | 2.579085888 | processed_transc | 1  | 46160356  | 46162747               |
| ENSG00000230897 | 1.616589159 | 1.16600992  | pseudogene       | 17 | 14608393  | 14608851               |
| ENSG00000230899 | 1.407729925 | 2.144285137 | antisense        | X  | 149007636 | 149009870              |
| ENSG00000230905 | 0.869158192 | 1.16600992  | sense_intronic   | 13 | 33066436  | 33072629 N4BP2L2-IT1   |
| ENSG00000230911 | 0.499066092 | 1.16600992  | pseudogene       | 11 | 111900582 | 111901091 PPIHP1       |
| ENSG00000230912 | 1.799000381 | 1.16600992  | antisense        | 22 | 39062513  | 39064755               |
| ENSG00000230913 | 2.847891871 | 3.027231696 | pseudogene       | 6  | 41634644  | 41635387               |

|                 |             |   |             |                    |   |    |           |           |           |
|-----------------|-------------|---|-------------|--------------------|---|----|-----------|-----------|-----------|
| ENSG00000230914 |             | 0 | 0.390640832 | lincRNA            |   | 7  | 2423756   | 2428232   |           |
| ENSG00000230916 | 1.407729925 |   | 1.518964905 | pseudogene         | X |    | 125605688 | 125606437 |           |
| ENSG00000230918 | 0.499066092 |   |             | 0 antisense        |   | 2  | 162929766 | 162931679 |           |
| ENSG00000230925 | 0.499066092 |   | 0.390640832 | antisense          |   | 9  | 33909913  | 33911120  |           |
| ENSG00000230928 | 0.499066092 |   |             | 0 antisense        |   | 10 | 100011780 | 100016332 |           |
| ENSG00000230929 | 0.869158192 |   | 0.390640832 | pseudogene         |   | 5  | 125963711 | 125964011 |           |
| ENSG00000230936 | 0.499066092 |   |             | 0 pseudogene       |   | 7  | 55410009  | 55412651  |           |
| ENSG00000230937 | 7.743231983 |   |             | 0 processed_transc |   | 1  | 209602165 | 209606183 | MIR205HG  |
| ENSG00000230939 |             | 0 | 1.16600992  | lincRNA            |   | 6  | 8784411   | 8785678   |           |
| ENSG00000230943 | 0.869158192 |   | 1.518964905 | lincRNA            |   | 6  | 113944737 | 113971276 |           |
| ENSG00000230946 | 1.616589159 |   | 1.353254395 | pseudogene         |   | 1  | 101406568 | 101407550 |           |
| ENSG00000230947 |             | 0 | 0.950786998 | sense_intronic     |   | 22 | 24994021  | 24995365  |           |
| ENSG00000230950 | 0.869158192 |   | 0.390640832 | pseudogene         |   | 2  | 117782653 | 117783694 | MTND2P21  |
| ENSG00000230952 | 0.499066092 |   |             | 0 lincRNA          |   | 2  | 11497641  | 11505762  |           |
| ENSG00000230953 | 1.16343121  |   | 1.16600992  | pseudogene         |   | 1  | 53386077  | 53386269  |           |
| ENSG00000230956 | 0.499066092 |   |             | 0 pseudogene       | X |    | 87351397  | 87352226  |           |
| ENSG00000230958 |             | 0 | 0.390640832 | pseudogene         |   | 2  | 112623375 | 112623982 |           |
| ENSG00000230964 |             | 0 | 0.390640832 | pseudogene         |   | 2  | 91766537  | 91766632  |           |
| ENSG00000230970 | 0.499066092 |   |             | 0 antisense        |   | 3  | 42744145  | 42746120  | HHATL-AS1 |
| ENSG00000230978 |             | 0 | 0.390640832 | lincRNA            |   | 21 | 36096105  | 36109478  | LINC00160 |
| ENSG00000230979 | 3.004694206 |   | 2.721932731 | pseudogene         |   | 2  | 47917855  | 47918385  |           |
| ENSG00000230980 | 1.16343121  |   | 0.697730409 | pseudogene         |   | 11 | 1813783   | 1814100   |           |
| ENSG00000230982 | 2.471521042 |   | 2.652276565 | pseudogene         |   | 21 | 48073470  | 48073934  | DSTNP1    |
| ENSG00000230989 | 9.470442173 |   | 9.901814226 | protein_coding     |   | 16 | 83841448  | 83853342  | HSBP1     |
| ENSG00000230992 | 1.616589159 |   | 1.518964905 | pseudogene         |   | 2  | 133110240 | 133112412 | FAM201B   |
| ENSG00000230993 | 1.407729925 |   | 1.16600992  | pseudogene         |   | 2  | 122416051 | 122416549 |           |
| ENSG00000231006 | 1.16343121  |   | 1.353254395 | pseudogene         |   | 7  | 108150677 | 108151420 |           |
| ENSG00000231007 | 5.239686603 |   | 4.903073497 | pseudogene         |   | 9  | 89626567  | 89628066  | CDC20P1   |
| ENSG00000231010 | 1.616589159 |   | 2.579085888 | lincRNA            |   | 22 | 46451620  | 46454040  |           |
| ENSG00000231013 |             | 0 | 1.16600992  | antisense          |   | 2  | 120234024 | 120244922 |           |
| ENSG00000231022 | 0.499066092 |   |             | 0 pseudogene       |   | 1  | 188663451 | 188664242 |           |
| ENSG00000231024 |             | 0 | 0.390640832 | lincRNA            |   | 2  | 69927324  | 69940979  |           |
| ENSG00000231025 | 6.435508026 |   | 6.510691757 | antisense          |   | 10 | 98752207  | 98755716  |           |
| ENSG00000231027 |             | 0 | 0.390640832 | pseudogene         |   | 17 | 72556855  | 72563482  |           |
| ENSG00000231028 | 0.869158192 |   | 1.16600992  | processed_transc   |   | 6  | 135818489 | 135842287 |           |
| ENSG00000231035 | 0.499066092 |   | 0.390640832 | pseudogene         |   | 2  | 218625270 | 218626014 | RPL7L1P9  |
| ENSG00000231043 | 1.16343121  |   | 1.16600992  | pseudogene         |   | 2  | 58687427  | 58689167  |           |
| ENSG00000231047 |             | 0 | 0.697730409 | pseudogene         |   | 3  | 190342384 | 190342958 | GCNT1P3   |
| ENSG00000231049 | 0.869158192 |   | 0.390640832 | pseudogene         |   | 11 | 5582197   | 5583147   | OR52B5P   |
| ENSG00000231050 | 0.869158192 |   | 0.950786998 | antisense          |   | 1  | 1822910   | 1824097   |           |
| ENSG00000231053 |             | 0 | 0.697730409 | pseudogene         | X |    | 69581336  | 69582224  |           |
| ENSG00000231056 | 1.616589159 |   | 2.788380093 | lincRNA            |   | 6  | 10474733  | 10478735  |           |
| ENSG00000231057 | 0.499066092 |   | 0.697730409 | antisense          |   | 1  | 211849104 | 211860801 |           |
| ENSG00000231059 |             | 0 | 0.390640832 | pseudogene         |   | 9  | 5312026   | 5312269   |           |
| ENSG00000231063 | 0.869158192 |   | 1.353254395 | pseudogene         |   | 2  | 210952950 | 210953788 |           |
| ENSG00000231064 | 3.146112541 |   | 4.990346085 | antisense          |   | 1  | 155166659 | 155175286 |           |
| ENSG00000231066 | 2.762599152 |   | 3.570966319 | pseudogene         | X |    | 14852707  | 14853442  |           |
| ENSG00000231072 | 0.869158192 |   | 0.390640832 | pseudogene         |   | 1  | 117256455 | 117257457 | GAPDHP64  |
| ENSG00000231073 | 1.799000381 |   | 0.950786998 | antisense          |   | 1  | 150945599 | 150948010 |           |
| ENSG00000231074 | 7.840089987 |   | 8.312357201 | processed_transc   |   | 6  | 30258571  | 30294927  | HCG18     |
| ENSG00000231081 | 2.471521042 |   | 2.788380093 | lincRNA            |   | 20 | 25989427  | 25991167  |           |
| ENSG00000231084 | 2.238690726 |   | 2.334191469 | pseudogene         |   | 1  | 185140466 | 185140842 |           |
| ENSG00000231086 | 1.16343121  |   | 1.353254395 | pseudogene         |   | 22 | 19112392  | 19113159  | TSSK1A    |
| ENSG00000231087 | 0.499066092 |   |             | 0 pseudogene       |   | 7  | 76597514  | 76598567  | FDPSP7    |
| ENSG00000231092 |             | 0 | 0.390640832 | antisense          |   | 2  | 217124318 | 217130853 |           |
| ENSG00000231093 | 1.16343121  |   | 0.950786998 | pseudogene         | X |    | 144711736 | 144713893 |           |
| ENSG00000231098 |             | 0 | 0.390640832 | antisense          |   | 7  | 133969252 | 133970807 |           |
| ENSG00000231102 |             | 0 | 0.390640832 | antisense          |   | 6  | 41688134  | 41701770  |           |
| ENSG00000231104 | 0.499066092 |   | 0.697730409 | antisense          |   | 10 | 119776998 | 119804868 |           |
| ENSG00000231105 | 1.799000381 |   | 2.334191469 | antisense          |   | 1  | 21619783  | 21626267  |           |
| ENSG00000231107 | 1.407729925 |   |             | 0 lincRNA          |   | 9  | 93063184  | 93195787  |           |
| ENSG00000231113 | 4.999881834 |   | 4.342020395 | antisense          |   | 6  | 42908102  | 42911708  |           |
| ENSG00000231119 | 2.10647801  |   | 0.950786998 | processed_transc   |   | 20 | 45981305  | 45983377  |           |

|                 |             |             |                    |    |           |           |            |
|-----------------|-------------|-------------|--------------------|----|-----------|-----------|------------|
| ENSG00000231120 | 0.499066092 | 0           | pseudogene         | 6  | 150299052 | 150299552 | BTF3P10    |
| ENSG00000231125 | 1.616589159 | 1.518964905 | antisense          | 21 | 30430394  | 30431977  |            |
| ENSG00000231131 | 1.407729925 | 0           | processed_transc   | 10 | 54210637  | 54230293  |            |
| ENSG00000231133 | 3.077135474 | 1.518964905 | processed_transc   | 20 | 61727150  | 61733631  | HAR1B      |
| ENSG00000231147 | 1.16343121  | 0.697730409 | pseudogene         | 2  | 130763773 | 130766696 |            |
| ENSG00000231148 | 0           | 0.390640832 | pseudogene         | 10 | 32202071  | 32202682  | HMGB1P7    |
| ENSG00000231154 | 3.004694206 | 3.183544561 | processed_transc X |    | 102942212 | 102946700 |            |
| ENSG00000231160 | 2.35979773  | 3.411459265 | processed_transc   | 4  | 38614322  | 38666504  |            |
| ENSG00000231167 | 1.16343121  | 1.802319292 | pseudogene         | 7  | 105222705 | 105223703 | YBX1P2     |
| ENSG00000231170 | 1.407729925 | 0.390640832 | antisense          | 7  | 95225994  | 95243031  |            |
| ENSG00000231172 | 0.499066092 | 0           | processed_transc   | 2  | 75767865  | 75769832  |            |
| ENSG00000231173 | 0           | 0.390640832 | lincRNA            | 2  | 741977    | 749856    |            |
| ENSG00000231176 | 0.499066092 | 0.390640832 | antisense          | 1  | 32816855  | 32818023  |            |
| ENSG00000231177 | 4.842525946 | 4.406904905 | antisense          | 3  | 10326103  | 10327430  | GHRLOS2    |
| ENSG00000231181 | 1.407729925 | 2.334191469 | pseudogene         | 1  | 9636485   | 9637043   |            |
| ENSG00000231184 | 1.799000381 | 1.518964905 | pseudogene         | 13 | 19956348  | 19957525  | FAM58DP    |
| ENSG00000231185 | 1.960915222 | 1.802319292 | processed_transc   | 5  | 141704858 | 142051566 |            |
| ENSG00000231187 | 4.568725997 | 3.32456471  | antisense          | 10 | 46951472  | 46966835  |            |
| ENSG00000231193 | 1.16343121  | 0.950786998 | processed_transc   | 9  | 32840596  | 32841760  |            |
| ENSG00000231196 | 0.499066092 | 0           | lincRNA            | 1  | 147762995 | 147767966 |            |
| ENSG00000231201 | 0.499066092 | 0.697730409 | antisense          | 21 | 16343791  | 16365175  |            |
| ENSG00000231203 | 0           | 0.390640832 | pseudogene         | 2  | 183935768 | 183937214 | KRT8P10    |
| ENSG00000231205 | 7.003331296 | 7.195117037 | pseudogene         | 19 | 20451078  | 20607775  | ZNF826P    |
| ENSG00000231206 | 0.499066092 | 0.697730409 | pseudogene X       |    | 73692850  | 73693788  | HNRNPA1P25 |
| ENSG00000231210 | 0.499066092 | 0           | lincRNA            | 7  | 116211014 | 116254874 |            |
| ENSG00000231212 | 0           | 1.16600992  | lincRNA            | 9  | 46661242  | 46662837  |            |
| ENSG00000231226 | 0.869158192 | 0.390640832 | antisense          | 6  | 30073017  | 30082501  | TRIM31-AS1 |
| ENSG00000231231 | 0           | 0.390640832 | lincRNA            | 21 | 39695557  | 39705343  |            |
| ENSG00000231233 | 3.077135474 | 3.368666104 | antisense          | 10 | 106111349 | 106113333 |            |
| ENSG00000231234 | 2.671945279 | 2.721932731 | pseudogene         | 7  | 65888392  | 65888880  | SKP1P1     |
| ENSG00000231241 | 0.869158192 | 0.697730409 | pseudogene         | 20 | 35650146  | 35650387  | RPS3AP3    |
| ENSG00000231242 | 2.847891871 | 2.501982735 | processed_transc   | 9  | 69082536  | 69108793  |            |
| ENSG00000231244 | 0.869158192 | 0           | pseudogene         | 7  | 136398618 | 136399935 | PSMC1P3    |
| ENSG00000231245 | 2.471521042 | 3.411459265 | pseudogene         | 10 | 32800264  | 32800665  | C1DP1      |
| ENSG00000231249 | 2.10647801  | 1.353254395 | antisense          | 3  | 4532575   | 4534847   |            |
| ENSG00000231254 | 0           | 0.390640832 | pseudogene         | 2  | 213696885 | 213697669 |            |
| ENSG00000231259 | 5.018397273 | 4.693656882 | pseudogene         | 2  | 87257800  | 87303536  |            |
| ENSG00000231261 | 0           | 0.390640832 | pseudogene         | 22 | 42105229  | 42105493  | HMG2P10    |
| ENSG00000231269 | 0.499066092 | 0.950786998 | processed_transc   | 1  | 98453556  | 98515161  | MIR137HG   |
| ENSG00000231270 | 1.960915222 | 3.183544561 | pseudogene X       |    | 118072116 | 118073097 |            |
| ENSG00000231274 | 4.165528823 | 2.144285137 | protein_coding     | 19 | 56052023  | 56056315  |            |
| ENSG00000231290 | 7.262161623 | 7.016060809 | processed_transc   | 20 | 57090435  | 57194944  |            |
| ENSG00000231292 | 1.16343121  | 2.039052734 | pseudogene         | 2  | 114163973 | 114164486 |            |
| ENSG00000231294 | 0           | 0.390640832 | antisense          | 2  | 211036242 | 211095107 |            |
| ENSG00000231296 | 0.499066092 | 0.390640832 | pseudogene         | 1  | 40728344  | 40728656  |            |
| ENSG00000231298 | 4.923348194 | 1.518964905 | processed_transc   | 10 | 4693009   | 4720346   |            |
| ENSG00000231300 | 0           | 0.390640832 | pseudogene         | 21 | 36972030  | 36972320  | EZH2P1     |
| ENSG00000231301 | 0           | 0.950786998 | pseudogene         | 6  | 29550285  | 29550802  | RPL13AP    |
| ENSG00000231305 | 2.238690726 | 2.971122874 | antisense          | 3  | 128580156 | 128590383 |            |
| ENSG00000231307 | 1.616589159 | 1.16600992  | pseudogene         | 20 | 37166401  | 37167101  | RPS3P2     |
| ENSG00000231312 | 5.848544806 | 5.700439663 | processed_transc   | 2  | 39663778  | 39892483  |            |
| ENSG00000231317 | 0           | 0.390640832 | pseudogene         | 7  | 55724461  | 55746183  |            |
| ENSG00000231327 | 2.57521082  | 1.802319292 | lincRNA            | 2  | 70351168  | 70352449  |            |
| ENSG00000231329 | 0.499066092 | 0.697730409 | antisense          | 6  | 139480299 | 139560442 |            |
| ENSG00000231333 | 0.499066092 | 0           | pseudogene         | 1  | 200832936 | 200833277 | RPL34P1    |
| ENSG00000231335 | 1.407729925 | 0           | sense_intronic     | 4  | 77558776  | 77565521  |            |
| ENSG00000231336 | 0.869158192 | 0           | antisense          | 2  | 46393928  | 46395117  |            |
| ENSG00000231340 | 3.78787645  | 3.679994897 | pseudogene X       |    | 53172014  | 53173095  | ACTG1P10   |
| ENSG00000231341 | 0.869158192 | 0.390640832 | pseudogene Y       |    | 5075256   | 5076110   | VDAC1P6    |
| ENSG00000231344 | 0           | 1.16600992  | pseudogene         | 1  | 28065602  | 28065950  |            |
| ENSG00000231345 | 2.671945279 | 3.993387124 | processed_transc   | 10 | 52415727  | 52420028  |            |
| ENSG00000231346 | 1.16343121  | 0.950786998 | lincRNA            | 1  | 112142277 | 112151345 |            |
| ENSG00000231351 | 0.499066092 | 0           | pseudogene         | 2  | 87157373  | 87157877  |            |

|                 |             |             |                  |    |           |           |            |
|-----------------|-------------|-------------|------------------|----|-----------|-----------|------------|
| ENSG00000231355 | 0           | 0.390640832 | antisense        | 21 | 34854806  | 34856565  |            |
| ENSG00000231357 | 0.869158192 | 1.353254395 | pseudogene       | 7  | 2875255   | 2875656   |            |
| ENSG00000231360 | 5.472368541 | 6.563824016 | protein_coding   | 1  | 144339738 | 144521058 |            |
| ENSG00000231362 | 0           | 0.950786998 | pseudogene       | 3  | 13094467  | 13094622  |            |
| ENSG00000231363 | 0.499066092 | 0           | lincRNA          | 1  | 94713464  | 94715048  |            |
| ENSG00000231365 | 5.879259127 | 5.995870484 | antisense        | 1  | 119683019 | 119818596 |            |
| ENSG00000231367 | 1.407729925 | 1.16600992  | lincRNA          | 2  | 38633861  | 38742882  |            |
| ENSG00000231369 | 1.407729925 | 2.144285137 | pseudogene       | 22 | 27282872  | 27283511  |            |
| ENSG00000231374 | 2.238690726 | 1.925536307 | antisense        | 19 | 54617086  | 54617594  |            |
| ENSG00000231382 | 0           | 0.390640832 | pseudogene       | 3  | 36657498  | 36678949  | NBPF21P    |
| ENSG00000231384 | 0           | 0.390640832 | pseudogene       | 3  | 172398504 | 172399014 |            |
| ENSG00000231386 | 0.869158192 | 0           | pseudogene       | 2  | 71037930  | 71038606  |            |
| ENSG00000231389 | 1.960915222 | 2.912743273 | protein_coding   | 6  | 33032346  | 33048552  | HLA-DPA1   |
| ENSG00000231393 | 0.869158192 | 0.390640832 | antisense        | 9  | 35642511  | 35643514  |            |
| ENSG00000231395 | 0           | 0.697730409 | pseudogene       | 3  | 23920472  | 23920989  |            |
| ENSG00000231401 | 0.499066092 | 0           | lincRNA          | 3  | 8406393   | 8408078   |            |
| ENSG00000231403 | 0.499066092 | 1.353254395 | lincRNA          | 2  | 11528149  | 11530493  |            |
| ENSG00000231405 | 0.869158192 | 0.697730409 | lincRNA          | 22 | 27539439  | 27555840  |            |
| ENSG00000231407 | 0           | 1.518964905 | antisense        | 1  | 170429594 | 170501788 |            |
| ENSG00000231409 | 1.16343121  | 1.353254395 | pseudogene       | 15 | 35235281  | 35235595  |            |
| ENSG00000231416 | 0           | 0.390640832 | pseudogene       | 1  | 153968108 | 153968436 |            |
| ENSG00000231419 | 0.499066092 | 1.353254395 | processed_transc | 7  | 158799213 | 158822886 |            |
| ENSG00000231434 | 3.830412367 | 3.183544561 | pseudogene       | 1  | 158493462 | 158495628 |            |
| ENSG00000231435 | 0.499066092 | 0.390640832 | lincRNA          | 2  | 8683722   | 8715631   |            |
| ENSG00000231439 | 0.499066092 | 0.697730409 | antisense        | 16 | 72910     | 75123     | WASIR2     |
| ENSG00000231441 | 0.869158192 | 2.039052734 | antisense        | 6  | 56708800  | 56728876  |            |
| ENSG00000231443 | 2.57521082  | 1.802319292 | pseudogene       | 3  | 195664114 | 195665610 |            |
| ENSG00000231445 | 0.869158192 | 0.950786998 | pseudogene       | 2  | 162933867 | 162934161 | TIMM8AP1   |
| ENSG00000231454 | 0.869158192 | 0           | pseudogene       | 9  | 44873417  | 44874226  |            |
| ENSG00000231458 | 4.999881834 | 4.65855978  | pseudogene       | 17 | 16586751  | 16587541  |            |
| ENSG00000231464 | 1.16343121  | 0.950786998 | pseudogene       | 3  | 195723609 | 195725104 |            |
| ENSG00000231466 | 2.471521042 | 2.652276565 | pseudogene       | 22 | 25745510  | 25746289  |            |
| ENSG00000231467 | 0           | 0.390640832 | antisense        | 22 | 37476108  | 37478887  |            |
| ENSG00000231468 | 0.869158192 | 2.242360793 | pseudogene       | 1  | 28852835  | 28853741  | PRDX3P2    |
| ENSG00000231471 | 0           | 0.390640832 | pseudogene       | 10 | 74396255  | 74396523  | HMG2P3     |
| ENSG00000231473 | 0.869158192 | 0.390640832 | processed_transc | 13 | 48870649  | 48877797  | LINC00441  |
| ENSG00000231483 | 1.16343121  | 0.390640832 | lincRNA          | 10 | 5650438   | 5652756   |            |
| ENSG00000231485 | 0           | 0.390640832 | lincRNA          | 1  | 65532310  | 65533420  |            |
| ENSG00000231500 | 12.54647352 | 13.2248702  | protein_coding   | 6  | 33239787  | 33244287  | RPS18      |
| ENSG00000231501 | 0.499066092 | 0           | pseudogene       | X  | 125606711 | 125606867 | MTND4LP1   |
| ENSG00000231503 | 3.393122761 | 3.570966319 | pseudogene       | 12 | 9392582   | 9392927   |            |
| ENSG00000231507 | 0.499066092 | 0           | lincRNA          | 1  | 203256280 | 203257929 |            |
| ENSG00000231508 | 0.499066092 | 0.390640832 | pseudogene       | 10 | 99152954  | 99153304  |            |
| ENSG00000231509 | 0           | 0.390640832 | lincRNA          | 9  | 5584490   | 5588994   |            |
| ENSG00000231512 | 0           | 0.390640832 | lincRNA          | 1  | 243192814 | 243215554 |            |
| ENSG00000231519 | 1.407729925 | 1.16600992  | antisense        | 7  | 30109274  | 30114731  |            |
| ENSG00000231527 | 2.35979773  | 2.242360793 | lincRNA          | 9  | 45108392  | 45112532  |            |
| ENSG00000231528 | 4.261916566 | 4.363974406 | processed_transc | 9  | 115875353 | 115882208 | LINC00256A |
| ENSG00000231530 | 1.407729925 | 1.518964905 | antisense        | 13 | 42617863  | 42618383  |            |
| ENSG00000231531 | 0.499066092 | 0.390640832 | pseudogene       | 7  | 143009777 | 143010154 | HINT1P1    |
| ENSG00000231534 | 0           | 0.390640832 | sense_intronic   | 2  | 230807444 | 230809853 | FBXO36-IT1 |
| ENSG00000231548 | 0.499066092 | 0           | pseudogene       | 11 | 4167512   | 4168525   | OR55B1P    |
| ENSG00000231550 | 0           | 0.390640832 | pseudogene       | 2  | 170623695 | 170625309 |            |
| ENSG00000231551 | 1.16343121  | 1.518964905 | processed_transc | 1  | 147887350 | 147901508 |            |
| ENSG00000231556 | 0.499066092 | 0.390640832 | pseudogene       | 7  | 64800087  | 64800581  | RSL24D1P3  |
| ENSG00000231559 | 0           | 0.390640832 | pseudogene       | 6  | 109138883 | 109139129 |            |
| ENSG00000231561 | 0.499066092 | 0.697730409 | pseudogene       | 19 | 43158352  | 43173228  | CEACAMP5   |
| ENSG00000231562 | 1.16343121  | 1.16600992  | pseudogene       | 9  | 109741057 | 109741835 |            |
| ENSG00000231563 | 0.499066092 | 0.950786998 | antisense        | 1  | 228595082 | 228597395 |            |
| ENSG00000231566 | 1.960915222 | 1.925536307 | processed_transc | X  | 45707328  | 45710920  |            |
| ENSG00000231574 | 6.414691513 | 7.603083446 | lincRNA          | 3  | 177534653 | 177617012 |            |
| ENSG00000231579 | 0           | 0.697730409 | pseudogene       | 5  | 142712170 | 142712804 |            |
| ENSG00000231581 | 3.554067925 | 2.851901313 | antisense        | 1  | 54690181  | 54691156  |            |



|                 |             |             |                  |    |           |           |             |
|-----------------|-------------|-------------|------------------|----|-----------|-----------|-------------|
| ENSG00000231584 | 4.381167248 | 3.748356452 | pseudogene       | 2  | 96679478  | 96687356  |             |
| ENSG00000231595 | 2.928422289 | 3.32456471  | antisense        | 17 | 14113805  | 14121239  |             |
| ENSG00000231601 | 0.499066092 | 0           | lincRNA          | 10 | 789932    | 790898    |             |
| ENSG00000231604 | 0.499066092 | 0           | lincRNA          | 20 | 55305453  | 55306516  |             |
| ENSG00000231605 | 1.407729925 | 0.950786998 | antisense        | 1  | 167145154 | 167165029 |             |
| ENSG00000231607 | 5.660945913 | 5.236305879 | processed_transc | 13 | 50601269  | 50699856  | DLEU2       |
| ENSG00000231609 | 3.004694206 | 3.027231696 | antisense        | 2  | 63271057  | 63275775  |             |
| ENSG00000231611 | 2.928422289 | 1.667587519 | lincRNA          | 11 | 116645826 | 116646592 |             |
| ENSG00000231613 | 0.869158192 | 0           | sense_intronic   | 1  | 90254473  | 90256051  |             |
| ENSG00000231615 | 1.16343121  | 0.390640832 | pseudogene       | 1  | 173331537 | 173332872 |             |
| ENSG00000231622 | 0           | 0.390640832 | pseudogene       | 1  | 65620163  | 65620333  |             |
| ENSG00000231625 | 0.869158192 | 0           | protein_coding   | 17 | 19532764  | 19537138  |             |
| ENSG00000231628 | 1.960915222 | 1.16600992  | antisense        | 6  | 105726891 | 105729630 |             |
| ENSG00000231630 | 0           | 0.390640832 | lincRNA          | 1  | 2730997   | 2731563   |             |
| ENSG00000231632 | 1.799000381 | 0.390640832 | lincRNA          | 9  | 91624949  | 91625393  |             |
| ENSG00000231633 | 0           | 0.390640832 | antisense        | 13 | 103395340 | 103397574 | LINC00283   |
| ENSG00000231635 | 0.499066092 | 0.390640832 | pseudogene       | 2  | 98822614  | 98824187  | ATP5BP1     |
| ENSG00000231636 | 0.869158192 | 0.390640832 | antisense        | 2  | 27272551  | 27273132  | AGBL5-AS1   |
| ENSG00000231638 | 3.393122761 | 2.971122874 | antisense        | 7  | 43548327  | 43562141  |             |
| ENSG00000231645 | 0.499066092 | 0           | pseudogene       | 17 | 20415873  | 20420792  |             |
| ENSG00000231651 | 0.869158192 | 0.697730409 | antisense        | X  | 69672808  | 69675844  | DLG3-AS1    |
| ENSG00000231652 | 0.499066092 | 0           | processed_transc | 6  | 74405258  | 74405854  |             |
| ENSG00000231663 | 2.57521082  | 2.501982735 | antisense        | 1  | 234508553 | 234509339 |             |
| ENSG00000231665 | 0.499066092 | 0.950786998 | pseudogene       | 13 | 49784558  | 49786430  | OGFOD1P1    |
| ENSG00000231666 | 0.869158192 | 1.16600992  | lincRNA          | 1  | 158101834 | 158110429 |             |
| ENSG00000231668 | 0.869158192 | 0           | pseudogene       | 3  | 38093250  | 38093886  |             |
| ENSG00000231669 | 1.407729925 | 0.950786998 | processed_transc | X  | 64808261  | 64820630  |             |
| ENSG00000231671 | 0.869158192 | 0           | lincRNA          | 1  | 101788893 | 101855859 |             |
| ENSG00000231680 | 0.869158192 | 1.16600992  | lincRNA          | 11 | 64161814  | 64163303  |             |
| ENSG00000231683 | 0           | 0.390640832 | processed_transc | 6  | 53426087  | 53481969  |             |
| ENSG00000231684 | 2.10647801  | 2.242360793 | pseudogene       | 1  | 182305136 | 182305475 |             |
| ENSG00000231686 | 0.499066092 | 0.390640832 | pseudogene       | X  | 145701115 | 145702102 |             |
| ENSG00000231690 | 0.499066092 | 0.390640832 | processed_transc | 6  | 170190417 | 170202969 | C6orf208    |
| ENSG00000231691 | 0           | 0.390640832 | antisense        | 1  | 204246133 | 204247076 |             |
| ENSG00000231697 | 1.16343121  | 1.16600992  | pseudogene       | 9  | 102937460 | 102938331 |             |
| ENSG00000231699 | 0.869158192 | 0.390640832 | pseudogene       | 2  | 198398527 | 198398689 |             |
| ENSG00000231700 | 3.502389126 | 3.027231696 | pseudogene       | 1  | 157678876 | 157680187 |             |
| ENSG00000231701 | 1.407729925 | 0           | pseudogene       | 9  | 70334349  | 70337925  |             |
| ENSG00000231702 | 1.407729925 | 1.353254395 | pseudogene       | 1  | 943454    | 943609    |             |
| ENSG00000231703 | 0.869158192 | 0.697730409 | antisense        | 20 | 52014199  | 52029448  |             |
| ENSG00000231704 | 0.869158192 | 0.390640832 | lincRNA          | 7  | 6120734   | 6132716   |             |
| ENSG00000231705 | 0.869158192 | 0.390640832 | lincRNA          | 10 | 134232587 | 134234457 |             |
| ENSG00000231707 | 0.499066092 | 0.950786998 | pseudogene       | 4  | 39975064  | 39975960  | PABPC1P1    |
| ENSG00000231709 | 0.869158192 | 0.697730409 | lincRNA          | 1  | 521369    | 523833    |             |
| ENSG00000231711 | 4.230497448 | 4.585695337 | processed_transc | 22 | 46436146  | 46440733  |             |
| ENSG00000231715 | 0           | 0.390640832 | pseudogene       | 20 | 49096304  | 49096528  | COX6CP2     |
| ENSG00000231721 | 6.290697143 | 5.187895122 | processed_transc | 7  | 130626519 | 130794935 |             |
| ENSG00000231724 | 2.471521042 | 2.039052734 | antisense        | 3  | 186525481 | 186535910 |             |
| ENSG00000231726 | 0.869158192 | 0           | pseudogene       | 11 | 73291298  | 73291562  | HMG2P6      |
| ENSG00000231729 | 0           | 0.390640832 | sense_intronic   | X  | 62890076  | 62891382  | ARHGEF9-IT1 |
| ENSG00000231730 | 2.847891871 | 2.652276565 | antisense        | 1  | 52259721  | 52264173  |             |
| ENSG00000231731 | 1.799000381 | 0.950786998 | antisense        | 2  | 128225153 | 128247366 |             |
| ENSG00000231734 | 1.799000381 | 2.721932731 | processed_transc | 1  | 143687097 | 143720401 |             |
| ENSG00000231735 | 0.499066092 | 0.390640832 | pseudogene       | 2  | 174162357 | 174163240 |             |
| ENSG00000231738 | 0           | 0.390640832 | protein_coding   | 12 | 85408094  | 85430055  | TSPAN19     |
| ENSG00000231741 | 0           | 0.390640832 | pseudogene       | 9  | 88549476  | 88551591  |             |
| ENSG00000231742 | 3.274897671 | 2.652276565 | lincRNA          | 20 | 48789087  | 48793096  |             |
| ENSG00000231744 | 0.499066092 | 0           | pseudogene       | 9  | 127360986 | 127361859 |             |
| ENSG00000231747 | 0           | 0.390640832 | pseudogene       | 2  | 113379386 | 113379744 |             |
| ENSG00000231748 | 1.16343121  | 1.16600992  | antisense        | 10 | 71025098  | 71027904  |             |
| ENSG00000231752 | 2.57521082  | 2.721932731 | pseudogene       | 1  | 121261143 | 121310591 | EMBP1       |
| ENSG00000231756 | 0           | 0.390640832 | antisense        | 9  | 16473186  | 16476235  |             |
| ENSG00000231757 | 0.499066092 | 0           | protein_coding   | 9  | 41305112  | 41311993  | FAM74A2     |

|                 |             |             |                  |    |           |                        |
|-----------------|-------------|-------------|------------------|----|-----------|------------------------|
| ENSG00000231760 | 1.960915222 | 1.518964905 | antisense        | 6  | 150118392 | 150119308              |
| ENSG00000231762 | 0           | 0.390640832 | pseudogene       | 6  | 77370203  | 77372487               |
| ENSG00000231767 | 1.799000381 | 1.518964905 | pseudogene       | 1  | 192685313 | 192685783 MIR4426      |
| ENSG00000231770 | 5.301468762 | 5.259915406 | antisense        | 3  | 194304740 | 194310989              |
| ENSG00000231771 | 0.869158192 | 1.518964905 | lincRNA          | X  | 21911718  | 21920026               |
| ENSG00000231779 | 1.616589159 | 1.802319292 | processed_transc | 1  | 24863138  | 24865371               |
| ENSG00000231784 | 3.211941663 | 3.493416095 | pseudogene       | 17 | 655900    | 658576 DBIL5P          |
| ENSG00000231789 | 1.407729925 | 1.353254395 | processed_transc | 1  | 9739858   | 9747632                |
| ENSG00000231792 | 2.471521042 | 3.081239798 | lincRNA          | 1  | 173831290 | 173833079              |
| ENSG00000231793 | 4.352265886 | 5.004391715 | pseudogene       | 11 | 67380124  | 67383728 DOC2GP        |
| ENSG00000231794 | 0.869158192 | 0.390640832 | antisense        | 7  | 134883153 | 134884924              |
| ENSG00000231795 | 0           | 0.390640832 | sense_intronic   | 20 | 33038735  | 33042357 ITCH-IT1      |
| ENSG00000231799 | 1.799000381 | 1.925536307 | pseudogene       | 9  | 92064473  | 92065664               |
| ENSG00000231802 | 0.499066092 | 0           | pseudogene       | 2  | 220548752 | 220549517              |
| ENSG00000231804 | 0           | 0.390640832 | pseudogene       | 9  | 91099767  | 91100240               |
| ENSG00000231806 | 5.191549282 | 5.03207928  | processed_transc | 9  | 97320996  | 97330312               |
| ENSG00000231816 | 0.499066092 | 0.697730409 | lincRNA          | 1  | 60238467  | 60254520               |
| ENSG00000231820 | 0           | 0.390640832 | sense_intronic   | 21 | 47170542  | 47172900               |
| ENSG00000231821 | 0.499066092 | 0.390640832 | pseudogene       | 2  | 4561794   | 4562646                |
| ENSG00000231822 | 1.616589159 | 0.950786998 | pseudogene       | 2  | 99718481  | 99719215               |
| ENSG00000231826 | 0.869158192 | 0.390640832 | processed_transc | 2  | 43254992  | 43266686               |
| ENSG00000231827 | 0.869158192 | 0.697730409 | pseudogene       | 1  | 153767649 | 153774567              |
| ENSG00000231829 | 0           | 0.697730409 | antisense        | 10 | 96901682  | 96928182               |
| ENSG00000231830 | 0.499066092 | 0.697730409 | antisense        | X  | 153562310 | 153563387              |
| ENSG00000231831 | 1.616589159 | 2.579085888 | pseudogene       | X  | 57419079  | 57421842               |
| ENSG00000231835 | 2.35979773  | 1.353254395 | antisense        | 1  | 70612804  | 70617628               |
| ENSG00000231840 | 0.499066092 | 0           | antisense        | 7  | 142952357 | 142984473              |
| ENSG00000231841 | 1.407729925 | 1.353254395 | pseudogene       | 4  | 153848598 | 153849359              |
| ENSG00000231842 | 0.499066092 | 1.353254395 | lincRNA          | 6  | 126498339 | 126523385              |
| ENSG00000231845 | 1.407729925 | 0.697730409 | pseudogene       | 3  | 133889331 | 133889929 HMGB3P14     |
| ENSG00000231848 | 0           | 0.390640832 | pseudogene       | 2  | 45223552  | 45224012               |
| ENSG00000231849 | 0.499066092 | 0.390640832 | pseudogene       | 1  | 36707499  | 36707757               |
| ENSG00000231851 | 2.57521082  | 0.697730409 | antisense        | 2  | 105713510 | 105719402              |
| ENSG00000231852 | 1.960915222 | 1.667587519 | protein_coding   | 6  | 32006042  | 32009447 CYP21A2       |
| ENSG00000231856 | 1.616589159 | 1.353254395 | antisense        | 13 | 52378433  | 52387356               |
| ENSG00000231858 | 0           | 0.390640832 | processed_transc | 2  | 191886252 | 191897040              |
| ENSG00000231859 | 1.16343121  | 0.697730409 | pseudogene       | 7  | 97535741  | 97536134               |
| ENSG00000231862 | 0.499066092 | 1.925536307 | lincRNA          | 13 | 50638816  | 50640735               |
| ENSG00000231865 | 2.10647801  | 1.802319292 | sense_intronic   | 11 | 116756762 | 116761437              |
| ENSG00000231868 | 0           | 0.390640832 | antisense        | 1  | 6503094   | 6507066                |
| ENSG00000231870 | 3.989024711 | 3.183544561 | pseudogene       | 17 | 28894401  | 28898563               |
| ENSG00000231871 | 1.407729925 | 2.242360793 | antisense        | 1  | 201657387 | 201798687              |
| ENSG00000231877 | 0           | 0.390640832 | processed_transc | 1  | 238648745 | 238701605              |
| ENSG00000231878 | 0.869158192 | 0           | pseudogene       | 20 | 48346128  | 48346379 SNRPPF1       |
| ENSG00000231881 | 1.16343121  | 1.925536307 | lincRNA          | 6  | 44041650  | 44045689               |
| ENSG00000231884 | 0.499066092 | 0           | pseudogene       | 3  | 48223037  | 48223216 NDUFB1P1      |
| ENSG00000231888 | 0           | 0.390640832 | pseudogene       | 3  | 176728507 | 176728855 MTND5P15     |
| ENSG00000231889 | 3.554067925 | 4.202780776 | processed_transc | 6  | 111804714 | 111919505 TRAF3IP2-AS1 |
| ENSG00000231890 | 3.502389126 | 4.566889334 | antisense        | 2  | 136742746 | 136774099              |
| ENSG00000231903 | 0           | 0.390640832 | antisense        | 2  | 203043383 | 203044114              |
| ENSG00000231905 | 0           | 0.950786998 | pseudogene       | 1  | 179152869 | 179153682 SETP10       |
| ENSG00000231906 | 0           | 0.697730409 | pseudogene       | 10 | 49754517  | 49754758               |
| ENSG00000231907 | 0           | 0.697730409 | pseudogene       | 22 | 41069488  | 41070455 GAPDHP37      |
| ENSG00000231908 | 2.35979773  | 1.667587519 | antisense        | 2  | 209119971 | 209120905              |
| ENSG00000231909 | 0           | 0.390640832 | pseudogene       | 9  | 19460882  | 19464522               |
| ENSG00000231911 | 0           | 0.390640832 | pseudogene       | 10 | 28947916  | 28948396               |
| ENSG00000231920 | 0.869158192 | 0.697730409 | antisense        | 10 | 21462943  | 21463977               |
| ENSG00000231924 | 1.407729925 | 2.788380093 | protein_coding   | 19 | 43341162  | 43383871 PSG1          |
| ENSG00000231925 | 12.29942571 | 12.03727694 | protein_coding   | 6  | 33267471  | 33282164 TAPBP         |
| ENSG00000231927 | 0           | 0.390640832 | antisense        | 7  | 1548291   | 1549063                |
| ENSG00000231929 | 0.499066092 | 1.353254395 | pseudogene       | X  | 134095741 | 134096335 HMGB3P31     |
| ENSG00000231940 | 2.10647801  | 1.518964905 | pseudogene       | 1  | 233424614 | 233425193 RPS7P3       |
| ENSG00000231942 | 0.499066092 | 0           | pseudogene       | 8  | 82720007  | 82720961               |

|                 |             |             |                  |    |           |                       |
|-----------------|-------------|-------------|------------------|----|-----------|-----------------------|
| ENSG00000231943 | 0           | 0.390640832 | processed_transc | 2  | 114285145 | 114300249             |
| ENSG00000231944 | 0.499066092 | 0           | antisense        | X  | 71908800  | 71932190 PHKA1-AS1    |
| ENSG00000231948 | 1.16343121  | 0.390640832 | sense_intronic   | 2  | 20790535  | 20792308 HS1BP3-IT1   |
| ENSG00000231952 | 1.407729925 | 1.16600992  | pseudogene       | 7  | 32852369  | 32878182              |
| ENSG00000231953 | 0           | 0.697730409 | antisense        | 1  | 25534630  | 25535360              |
| ENSG00000231955 | 4.352265886 | 4.52825526  | antisense        | 2  | 206980271 | 206987047             |
| ENSG00000231956 | 0           | 0.390640832 | pseudogene       | 7  | 87150777  | 87151726 HNRNPA1P9    |
| ENSG00000231962 | 0           | 1.667587519 | pseudogene       | 21 | 11153837  | 11155057 VN1R7P       |
| ENSG00000231964 | 0.499066092 | 0.390640832 | antisense        | 10 | 45940018  | 45948569              |
| ENSG00000231965 | 0.869158192 | 1.353254395 | pseudogene       | 8  | 11032560  | 11033079              |
| ENSG00000231966 | 0.869158192 | 0           | lincRNA          | 1  | 179798744 | 179805259             |
| ENSG00000231970 | 0.499066092 | 0.697730409 | antisense        | 10 | 99160872  | 99179281              |
| ENSG00000231976 | 0           | 0.950786998 | lincRNA          | 10 | 26932098  | 26942383              |
| ENSG00000231977 | 0.869158192 | 1.16600992  | lincRNA          | 20 | 61798149  | 61812255              |
| ENSG00000231978 | 0           | 0.390640832 | pseudogene       | 1  | 22094762  | 22095122              |
| ENSG00000231981 | 0           | 0.390640832 | pseudogene       | 13 | 99602011  | 99602701 RPL7L1P12    |
| ENSG00000231982 | 4.409500985 | 5.018301917 | pseudogene       | 3  | 186544338 | 186545126             |
| ENSG00000231989 | 1.407729925 | 1.16600992  | pseudogene       | 5  | 156277549 | 156279539 PPP1R2P3    |
| ENSG00000231991 | 4.062237333 | 3.935919592 | pseudogene       | 9  | 33624223  | 33625532 ANXA2P2      |
| ENSG00000231993 | 3.393122761 | 1.353254395 | processed_transc | 22 | 41570595  | 41593460              |
| ENSG00000231995 | 0.499066092 | 0           | pseudogene       | 9  | 46577620  | 46578220              |
| ENSG00000231996 | 0           | 0.390640832 | pseudogene       | 1  | 100308166 | 100308317             |
| ENSG00000231997 | 2.57521082  | 3.279072565 | protein_coding   | 9  | 46389110  | 46391556              |
| ENSG00000231999 | 1.407729925 | 0.390640832 | antisense        | 1  | 90048800  | 90098453              |
| ENSG00000232004 | 1.16343121  | 0.697730409 | pseudogene       | 10 | 44100291  | 44101699 CAP1P2       |
| ENSG00000232008 | 0.869158192 | 2.334191469 | pseudogene       | 9  | 45414087  | 45416465              |
| ENSG00000232010 | 2.238690726 | 0.697730409 | antisense        | 21 | 45670696  | 45671403              |
| ENSG00000232013 | 1.16343121  | 1.667587519 | protein_coding   | 3  | 145782358 | 145784156             |
| ENSG00000232015 | 0.499066092 | 0.697730409 | pseudogene       | 1  | 78319040  | 78319576              |
| ENSG00000232019 | 3.393122761 | 2.652276565 | lincRNA          | 7  | 84568665  | 84569561              |
| ENSG00000232022 | 2.471521042 | 3.183544561 | pseudogene       | 1  | 46897801  | 46911374              |
| ENSG00000232024 | 0.869158192 | 0.390640832 | pseudogene       | 8  | 35382694  | 35383281 LSM12P1      |
| ENSG00000232027 | 1.616589159 | 0.697730409 | pseudogene       | 1  | 51837951  | 51838812              |
| ENSG00000232028 | 0.499066092 | 0.390640832 | lincRNA          | 2  | 37552483  | 37553940              |
| ENSG00000232031 | 0           | 0.390640832 | sense_intronic   | 6  | 82434439  | 82446070              |
| ENSG00000232034 | 0.869158192 | 1.16600992  | sense_intronic   | 2  | 101439123 | 101463682             |
| ENSG00000232036 | 0.499066092 | 0           | pseudogene       | 1  | 184535645 | 184536987             |
| ENSG00000232037 | 0           | 0.390640832 | pseudogene       | 1  | 22234591  | 22235073              |
| ENSG00000232040 | 4.131913373 | 4.604259349 | protein_coding   | 6  | 28539407  | 28583989 SCAND3       |
| ENSG00000232041 | 0.499066092 | 0           | pseudogene       | 13 | 73610539  | 73610986 PSMD10P3     |
| ENSG00000232043 | 2.238690726 | 2.721932731 | antisense        | 20 | 49187512  | 49194578              |
| ENSG00000232053 | 0.499066092 | 0           | lincRNA          | 7  | 135777673 | 136122174             |
| ENSG00000232059 | 1.407729925 | 1.518964905 | pseudogene       | 1  | 244857732 | 244858022             |
| ENSG00000232060 | 0.499066092 | 0.390640832 | pseudogene       | 9  | 30558885  | 30559563              |
| ENSG00000232063 | 5.458875168 | 5.306006045 | processed_transc | 9  | 97094758  | 97123230              |
| ENSG00000232065 | 0.869158192 | 1.518964905 | antisense        | 3  | 196358369 | 196359458             |
| ENSG00000232070 | 0.499066092 | 1.16600992  | protein_coding   | 14 | 21567096  | 21571883 C14orf176    |
| ENSG00000232075 | 0           | 0.390640832 | pseudogene       | 10 | 65394077  | 65394587 MRPL35P2     |
| ENSG00000232082 | 0.499066092 | 1.16600992  | sense_intronic   | 6  | 166874151 | 166878871 RPS6KA2-IT1 |
| ENSG00000232083 | 0           | 0.390640832 | pseudogene       | 17 | 78576349  | 78576741              |
| ENSG00000232085 | 0           | 0.390640832 | antisense        | 1  | 243327940 | 243332747             |
| ENSG00000232093 | 3.830412367 | 4.101879561 | antisense        | 1  | 155017667 | 155018594             |
| ENSG00000232097 | 0.499066092 | 0.390640832 | pseudogene       | 7  | 97567751  | 97568106              |
| ENSG00000232098 | 6.579622637 | 6.210997888 | protein_coding   | 19 | 58915623  | 58918663              |
| ENSG00000232103 | 3.502389126 | 2.420525079 | protein_coding   | 17 | 29705666  | 29709134              |
| ENSG00000232104 | 0           | 0.390640832 | lincRNA          | 9  | 3526723   | 3671646               |
| ENSG00000232110 | 0.869158192 | 2.721932731 | antisense        | 10 | 91043394  | 91051882              |
| ENSG00000232112 | 7.102117104 | 7.724721747 | protein_coding   | 3  | 48481667  | 48485616 CCDC72       |
| ENSG00000232116 | 1.616589159 | 2.579085888 | lincRNA          | 9  | 45484572  | 45488153              |
| ENSG00000232118 | 0           | 0.950786998 | antisense        | 21 | 30742340  | 30743547 BACH1-AS1    |
| ENSG00000232119 | 8.526833966 | 9.066597822 | protein_coding   | X  | 119727865 | 119746334 MCTS1       |
| ENSG00000232124 | 3.146112541 | 2.652276565 | antisense        | 21 | 45621173  | 45622579              |
| ENSG00000232129 | 0           | 0.390640832 | pseudogene       | 5  | 137887850 | 137888050             |

|                 |             |             |                  |    |           |                     |
|-----------------|-------------|-------------|------------------|----|-----------|---------------------|
| ENSG00000232131 | 0.499066092 |             | 0 antisense      | 6  | 126119002 | 126140004           |
| ENSG00000232133 | 0.869158192 | 0.697730409 | pseudogene       | 2  | 202002239 | 202004750 IMPDH1P10 |
| ENSG00000232134 | 1.16343121  | 0.950786998 | pseudogene       | 1  | 220317306 | 220317693           |
| ENSG00000232139 | 0           | 0.390640832 | lincRNA          | 10 | 120116620 | 120124615           |
| ENSG00000232140 | 0.499066092 |             | 0 lincRNA        | 2  | 121311319 | 121315685           |
| ENSG00000232142 | 0           | 0.390640832 | pseudogene       | 10 | 71958744  | 71958995            |
| ENSG00000232149 | 0.869158192 |             | 0 pseudogene     | X  | 122736990 | 122737782 FERP1     |
| ENSG00000232150 | 0           | 1.353254395 | pseudogene       | 13 | 50746225  | 50747317 ST13P4     |
| ENSG00000232151 | 2.238690726 | 2.851901313 | processed_transc | 1  | 149575482 | 149651107           |
| ENSG00000232157 | 7.54038131  | 6.847095496 | antisense        | 6  | 34252267  | 34254545            |
| ENSG00000232160 | 3.830412367 | 4.468996429 | antisense        | X  | 131351175 | 131566890           |
| ENSG00000232162 | 0.499066092 |             | 0 antisense      | 13 | 27736992  | 27743272 USP12-AS1  |
| ENSG00000232163 | 0           | 0.697730409 | pseudogene       | 13 | 23947562  | 23948155 RPLP1P13   |
| ENSG00000232172 | 0.499066092 | 0.697730409 | pseudogene       | 9  | 133527186 | 133527770           |
| ENSG00000232173 | 0.499066092 | 0.697730409 | pseudogene       | 6  | 29541686  | 29542613 OR2H5P     |
| ENSG00000232176 | 1.16343121  | 1.353254395 | pseudogene       | 9  | 19200333  | 19201044            |
| ENSG00000232177 | 1.16343121  | 0.950786998 | pseudogene       | X  | 125606868 | 125607264 MTND4P24  |
| ENSG00000232186 | 2.471521042 | 2.242360793 | pseudogene       | X  | 74546607  | 74547834            |
| ENSG00000232187 | 5.270908378 | 4.903073497 | pseudogene       | 13 | 23270162  | 23270713 FTH1P7     |
| ENSG00000232194 | 0           | 0.697730409 | antisense        | 1  | 167789644 | 167790462           |
| ENSG00000232196 | 1.616589159 | 2.039052734 | protein_coding   | 16 | 3421053   | 3422283 MTRNR2L4    |
| ENSG00000232197 | 0           | 0.390640832 | antisense        | 6  | 170477741 | 170478251           |
| ENSG00000232202 | 0           | 0.390640832 | pseudogene       | 2  | 43053462  | 43054757            |
| ENSG00000232203 | 0.499066092 | 0.697730409 | pseudogene       | 9  | 31253899  | 31254775            |
| ENSG00000232210 | 0.869158192 | 0.390640832 | pseudogene       | 7  | 74155796  | 74156460 PHBP15     |
| ENSG00000232214 | 0.499066092 |             | 0 antisense      | 9  | 36307039  | 36315276            |
| ENSG00000232217 | 0           | 0.697730409 | pseudogene       | 13 | 98639204  | 98639470 FTLP8      |
| ENSG00000232218 | 1.16343121  | 0.697730409 | pseudogene       | 22 | 32782655  | 32782855            |
| ENSG00000232223 | 0           | 0.390640832 | pseudogene       | 1  | 166765503 | 166766420 CNN2P10   |
| ENSG00000232224 | 0           | 1.802319292 | lincRNA          | 10 | 27220135  | 27230930 LINC00202  |
| ENSG00000232228 | 0           | 0.390640832 | pseudogene       | 2  | 69821873  | 69822190            |
| ENSG00000232229 | 1.799000381 | 0.390640832 | processed_transc | 10 | 91589267  | 91600618            |
| ENSG00000232233 | 3.652182994 | 3.493416095 | processed_transc | 3  | 186528669 | 186543310           |
| ENSG00000232237 | 1.407729925 | 0.950786998 | pseudogene       | 1  | 201083880 | 201084796           |
| ENSG00000232259 | 3.554067925 | 3.368666104 | lincRNA          | 10 | 129727640 | 129732781           |
| ENSG00000232260 | 0           | 0.697730409 | pseudogene       | 21 | 18890841  | 18891311 BTF3L4P1   |
| ENSG00000232267 | 0.499066092 |             | 0 pseudogene     | X  | 67991165  | 67992421 ACTR3P2    |
| ENSG00000232270 | 1.799000381 | 0.950786998 | pseudogene       | 7  | 65112777  | 65183665 INTS4L2    |
| ENSG00000232273 | 1.960915222 | 1.802319292 | pseudogene       | 1  | 38010364  | 38010895 FTH1P1     |
| ENSG00000232274 | 1.407729925 | 1.802319292 | lincRNA          | 1  | 143118704 | 143211070           |
| ENSG00000232277 | 0.499066092 |             | 0 pseudogene     | 2  | 112709721 | 112710248           |
| ENSG00000232282 | 0           | 0.390640832 | pseudogene       | X  | 102040595 | 102041532 MTND1P32  |
| ENSG00000232284 | 1.960915222 | 2.334191469 | processed_transc | 1  | 68297986  | 68668670            |
| ENSG00000232290 | 0           | 0.950786998 | antisense        | 6  | 151376033 | 151377193           |
| ENSG00000232294 | 0           | 0.390640832 | lincRNA          | 20 | 51288456  | 51307468            |
| ENSG00000232295 | 5.346128795 | 5.536128679 | antisense        | 6  | 71961061  | 72037787            |
| ENSG00000232300 | 4.097495944 | 3.714580548 | antisense        | 17 | 44636196  | 44640161 FAM215B    |
| ENSG00000232303 | 1.16343121  | 0.950786998 | pseudogene       | 9  | 32566151  | 32567124            |
| ENSG00000232305 | 0           | 0.950786998 | pseudogene       | 22 | 17903436  | 17903823 CLCP1      |
| ENSG00000232306 | 0.499066092 |             | 0 antisense      | 2  | 239207351 | 239209261           |
| ENSG00000232311 | 0           | 0.390640832 | lincRNA          | 6  | 110147725 | 110149988           |
| ENSG00000232317 | 0           | 0.390640832 | protein_coding   | 9  | 139141824 | 139143051           |
| ENSG00000232320 | 0.499066092 | 1.16600992  | pseudogene       | 2  | 162197325 | 162197837           |
| ENSG00000232324 | 3.871730003 | 2.039052734 | lincRNA          | 19 | 54368017  | 54369394            |
| ENSG00000232325 | 2.847891871 | 1.667587519 | lincRNA          | 7  | 70972     | 71835               |
| ENSG00000232328 | 0.499066092 | 0.390640832 | lincRNA          | 2  | 237642025 | 237663006           |
| ENSG00000232334 | 2.762599152 | 1.667587519 | pseudogene       | 10 | 125763820 | 125764344           |
| ENSG00000232336 | 0.499066092 |             | 0 lincRNA        | 1  | 143188828 | 143189695           |
| ENSG00000232341 | 0.499066092 | 1.16600992  | pseudogene       | 1  | 166716594 | 166717899           |
| ENSG00000232344 | 2.471521042 | 2.039052734 | pseudogene       | 17 | 17913957  | 17915136            |
| ENSG00000232346 | 2.10647801  | 1.925536307 | pseudogene       | 22 | 32435477  | 32435883            |
| ENSG00000232347 | 2.238690726 | 2.971122874 | processed_transc | 1  | 247373993 | 247405125           |
| ENSG00000232349 | 0.499066092 | 0.950786998 | pseudogene       | 2  | 133246129 | 133246661 YBX1P7    |

|                 |             |             |                            |   |    |           |                      |
|-----------------|-------------|-------------|----------------------------|---|----|-----------|----------------------|
| ENSG00000232352 | 0.869158192 | 0.950786998 | antisense                  |   | 3  | 50304073  | 50304803             |
| ENSG00000232359 | 0.499066092 | 0.390640832 | lincRNA                    |   | 2  | 151451616 | 151476581            |
| ENSG00000232362 | 0.499066092 |             | 0 pseudogene               |   | 6  | 123180823 | 123181133 ATP5LP2    |
| ENSG00000232363 | 0.869158192 | 0.390640832 | antisense                  |   | 22 | 45831744  | 45844624             |
| ENSG00000232368 |             | 0           | 0.697730409 pseudogene     | X |    | 30648415  | 30648942 FTLP2       |
| ENSG00000232369 |             | 0           | 0.697730409 pseudogene     |   | 1  | 45453906  | 45454397             |
| ENSG00000232372 | 2.471521042 | 1.518964905 | pseudogene                 |   | 1  | 224170456 | 224175856            |
| ENSG00000232373 | 1.16343121  | 0.697730409 | pseudogene                 |   | 13 | 96346823  | 96347954 MTCYBP3     |
| ENSG00000232374 | 0.869158192 |             | 0 pseudogene               |   | 3  | 158558882 | 158559749 GPR79      |
| ENSG00000232377 |             | 0           | 0.390640832 antisense      |   | 2  | 144694640 | 144721723            |
| ENSG00000232378 |             | 0           | 0.390640832 pseudogene     |   | 13 | 37500575  | 37501356 RPL29P28    |
| ENSG00000232379 |             | 0           | 0.697730409 pseudogene     | X |    | 136029907 | 136030292            |
| ENSG00000232380 | 0.499066092 | 0.697730409 | pseudogene                 |   | 13 | 69559190  | 69560196 ZDHC20P4    |
| ENSG00000232385 | 1.616589159 | 0.697730409 | pseudogene                 |   | 7  | 94324339  | 94325131             |
| ENSG00000232386 | 3.989024711 | 3.368666104 | lincRNA                    |   | 15 | 101389766 | 101404501            |
| ENSG00000232387 |             | 0           | 1.16600992 protein_coding  |   | 9  | 125524123 | 125524948 SKA2L      |
| ENSG00000232388 | 7.457998197 | 7.909600377 | lincRNA                    |   | 20 | 18548064  | 18550207 LINC00493   |
| ENSG00000232389 | 0.869158192 | 1.353254395 | pseudogene                 |   | 6  | 71317937  | 71319037             |
| ENSG00000232396 | 0.499066092 | 0.697730409 | antisense                  |   | 22 | 30101245  | 30115848             |
| ENSG00000232398 |             | 0           | 0.697730409 pseudogene     |   | 4  | 68632198  | 68639572 TMPRSS11CP  |
| ENSG00000232400 |             | 0           | 0.697730409 pseudogene     |   | 7  | 16903891  | 16905932 RAD17P1     |
| ENSG00000232406 | 0.499066092 | 0.950786998 | processed_transc           |   | 20 | 34738335  | 34743655             |
| ENSG00000232407 |             | 0           | 0.697730409 pseudogene     |   | 3  | 60675958  | 60676452             |
| ENSG00000232411 |             | 0           | 0.390640832 lincRNA        |   | 2  | 166689558 | 166695608            |
| ENSG00000232412 | 1.407729925 | 1.16600992  | lincRNA                    | X |    | 123093083 | 123095191            |
| ENSG00000232415 | 0.499066092 | 1.802319292 | antisense                  |   | 7  | 73473906  | 73476614             |
| ENSG00000232422 |             | 0           | 0.697730409 pseudogene     |   | 6  | 73696036  | 73697473             |
| ENSG00000232430 | 0.869158192 | 0.950786998 | pseudogene                 |   | 2  | 183652825 | 183653162            |
| ENSG00000232434 | 6.086493765 | 6.104183162 | protein_coding             |   | 9  | 139738867 | 139741797 C9orf172   |
| ENSG00000232437 |             | 0           | 0.390640832 pseudogene     |   | 10 | 76884975  | 76885620             |
| ENSG00000232439 | 2.762599152 | 2.420525079 | pseudogene                 |   | 3  | 38568293  | 38568816 RPL18AP7    |
| ENSG00000232442 | 4.999881834 | 5.824376633 | antisense                  |   | 20 | 62258580  | 62260177             |
| ENSG00000232445 | 7.876068031 | 6.99862477  | antisense                  |   | 7  | 100951627 | 100954266            |
| ENSG00000232450 | 2.35979773  | 2.851901313 | pseudogene                 |   | 1  | 114241506 | 114242253            |
| ENSG00000232453 | 1.616589159 | 1.518964905 | lincRNA                    |   | 1  | 59348540  | 59362375             |
| ENSG00000232454 | 0.499066092 | 0.697730409 | pseudogene                 |   | 9  | 37835659  | 37836391             |
| ENSG00000232455 | 0.499066092 | 0.390640832 | antisense                  |   | 3  | 45525466  | 45551037 LARS2-AS1   |
| ENSG00000232456 | 0.869158192 | 0.697730409 | pseudogene                 |   | 1  | 16361673  | 16366524             |
| ENSG00000232457 | 2.10647801  | 1.16600992  | protein_coding             |   | 17 | 62950242  | 62952716             |
| ENSG00000232458 | 0.499066092 | 0.390640832 | lincRNA                    |   | 7  | 41004266  | 41019537             |
| ENSG00000232460 | 0.499066092 |             | 0 pseudogene               |   | 11 | 121232559 | 121233574 BMPR1APS2  |
| ENSG00000232463 |             | 0           | 0.390640832 pseudogene     |   | 1  | 176200336 | 176200966            |
| ENSG00000232467 | 0.499066092 | 0.390640832 | pseudogene                 |   | 1  | 46312664  | 46313280             |
| ENSG00000232470 | 0.869158192 | 1.667587519 | antisense                  |   | 10 | 112629501 | 112631352            |
| ENSG00000232472 | 2.762599152 | 2.144285137 | pseudogene                 | X |    | 24806509  | 24807186 EEF1B2P3    |
| ENSG00000232478 | 0.499066092 |             | 0 protein_coding           | X |    | 134847185 | 134858567 CT45A1     |
| ENSG00000232479 | 0.869158192 | 0.697730409 | pseudogene                 |   | 2  | 203789332 | 203790821            |
| ENSG00000232480 | 3.911897206 | 4.585695337 | antisense                  |   | 1  | 218517538 | 218519020            |
| ENSG00000232485 | 2.10647801  | 1.802319292 | processed_transc           |   | 2  | 217343753 | 217363484            |
| ENSG00000232486 | 0.869158192 | 0.697730409 | pseudogene                 |   | 9  | 108520445 | 108523036            |
| ENSG00000232487 |             | 0           | 0.390640832 sense_intronic |   | 13 | 114873044 | 114874295 RASA3-IT1  |
| ENSG00000232489 |             | 0           | 0.697730409 pseudogene     |   | 13 | 31115780  | 31117034 MFAP1P1     |
| ENSG00000232490 | 0.869158192 |             | 0 antisense                |   | 3  | 31745550  | 31763144 OSBPL10-AS1 |
| ENSG00000232491 | 0.869158192 | 0.390640832 | pseudogene                 |   | 7  | 66021203  | 66022052             |
| ENSG00000232493 |             | 0           | 1.518964905 pseudogene     |   | 20 | 40176061  | 40176561 RPL12P11    |
| ENSG00000232496 | 0.499066092 | 0.697730409 | pseudogene                 | X |    | 121672106 | 121673308 RPL3P12    |
| ENSG00000232498 | 0.499066092 |             | 0 antisense                |   | 1  | 192486769 | 192536347            |
| ENSG00000232499 | 1.407729925 | 1.16600992  | pseudogene                 |   | 1  | 113992322 | 113993352            |
| ENSG00000232504 | 0.499066092 | 0.390640832 | processed_transc           |   | 2  | 86116403  | 86118990             |
| ENSG00000232508 | 1.407729925 | 1.16600992  | pseudogene                 |   | 2  | 88664214  | 88665127 MRPL45P1    |
| ENSG00000232517 | 0.499066092 |             | 0 pseudogene               |   | 5  | 54104038  | 54168379             |
| ENSG00000232518 |             | 0           | 0.390640832 antisense      |   | 2  | 38895830  | 38898563             |
| ENSG00000232519 | 1.616589159 | 1.353254395 | antisense                  |   | 1  | 155579339 | 155580171            |

|                 |             |             |                    |    |           |                      |
|-----------------|-------------|-------------|--------------------|----|-----------|----------------------|
| ENSG00000232520 | 0.499066092 | 0           | antisense          | 2  | 231751215 | 231761806            |
| ENSG00000232524 | 0           | 0.390640832 | antisense          | 7  | 123096683 | 123099910            |
| ENSG00000232527 | 4.352265886 | 4.794098771 | lincRNA            | 1  | 148928322 | 148951595            |
| ENSG00000232528 | 1.16343121  | 1.353254395 | pseudogene         | 20 | 1748603   | 1760641              |
| ENSG00000232530 | 3.211941663 | 3.133298822 | antisense          | 22 | 30635183  | 30636527             |
| ENSG00000232531 | 0.869158192 | 0           | pseudogene         | 2  | 91935966  | 91937021             |
| ENSG00000232533 | 6.032862302 | 6.097646709 | antisense          | 7  | 143076785 | 143077588            |
| ENSG00000232536 | 2.238690726 | 2.420525079 | processed_transc   | 1  | 151512992 | 151534331            |
| ENSG00000232545 | 2.762599152 | 2.144285137 | sense_intronic     | 22 | 24497652  | 24499317             |
| ENSG00000232546 | 2.471521042 | 2.039052734 | pseudogene         | 7  | 66313483  | 66323123             |
| ENSG00000232559 | 6.502803968 | 6.25865215  | pseudogene         | 7  | 66010634  | 66057373             |
| ENSG00000232560 | 0           | 0.697730409 | protein_coding     | 21 | 18811208  | 18821503 C21orf37    |
| ENSG00000232561 | 0.499066092 | 1.16600992  | pseudogene         | 7  | 74602783  | 74653438 GTF2IP1     |
| ENSG00000232564 | 1.960915222 | 1.518964905 | antisense          | 22 | 40917804  | 40922711             |
| ENSG00000232568 | 0           | 0.390640832 | pseudogene         | 2  | 187126150 | 187126646            |
| ENSG00000232573 | 4.062237333 | 3.87606762  | pseudogene         | 14 | 99439216  | 99439638 RPL3P4      |
| ENSG00000232579 | 0           | 1.518964905 | pseudogene         | 19 | 12615479  | 12615704             |
| ENSG00000232586 | 0           | 0.697730409 | processed_transc   | 1  | 180918835 | 180924023            |
| ENSG00000232587 | 1.960915222 | 2.851901313 | pseudogene         | 13 | 28788650  | 28790034 EEF1A1P3    |
| ENSG00000232593 | 3.554067925 | 3.679994897 | processed_transc X |    | 53123339  | 53171889             |
| ENSG00000232600 | 3.335220907 | 2.420525079 | antisense          | 8  | 145660602 | 145665354            |
| ENSG00000232605 | 0           | 0.390640832 | pseudogene         | 7  | 84505870  | 84506272 HMG2P11     |
| ENSG00000232607 | 2.35979773  | 2.788380093 | antisense          | 17 | 6919137   | 6922949 MIR497HG     |
| ENSG00000232608 | 0           | 0.390640832 | pseudogene         | 21 | 40588550  | 40589432 TIMM9P2     |
| ENSG00000232610 | 0.499066092 | 0           | pseudogene         | 3  | 190432600 | 190434188 CCT6P4     |
| ENSG00000232611 | 3.911897206 | 4.640685763 | lincRNA X          |    | 135923090 | 135929956            |
| ENSG00000232613 | 0           | 0.950786998 | antisense          | 2  | 65257861  | 65280151             |
| ENSG00000232615 | 0.499066092 | 2.039052734 | pseudogene         | 5  | 1614951   | 1616445              |
| ENSG00000232622 | 0           | 0.390640832 | pseudogene         | 1  | 85101841  | 85102789             |
| ENSG00000232623 | 1.407729925 | 0.697730409 | antisense          | 21 | 33678775  | 33681048             |
| ENSG00000232625 | 1.16343121  | 0.697730409 | pseudogene         | 2  | 219706322 | 219706788            |
| ENSG00000232626 | 0.869158192 | 1.667587519 | pseudogene         | 1  | 202407524 | 202408696            |
| ENSG00000232627 | 0.869158192 | 0.390640832 | pseudogene         | 7  | 23405237  | 23405595             |
| ENSG00000232628 | 0.869158192 | 0.390640832 | sense_intronic     | 1  | 224396449 | 224400981            |
| ENSG00000232630 | 3.871730003 | 3.87606762  | pseudogene         | 9  | 127912932 | 127913868 PRPS1P2    |
| ENSG00000232633 | 0.869158192 | 0           | antisense          | 5  | 112658725 | 112772871            |
| ENSG00000232637 | 2.847891871 | 2.652276565 | protein_coding     | 1  | 146032648 | 146253110            |
| ENSG00000232640 | 2.471521042 | 2.334191469 | antisense          | 6  | 170125187 | 170125950            |
| ENSG00000232645 | 0.869158192 | 1.16600992  | antisense          | 20 | 23337231  | 23338753             |
| ENSG00000232648 | 1.960915222 | 1.925536307 | antisense          | 4  | 184416091 | 184425647            |
| ENSG00000232653 | 0.499066092 | 0.697730409 | protein_coding     | 15 | 32885657  | 32896179             |
| ENSG00000232654 | 2.671945279 | 3.232099092 | pseudogene         | 6  | 3045618   | 3046034 FAM136BP     |
| ENSG00000232655 | 1.407729925 | 0           | lincRNA            | 22 | 44839207  | 44840668             |
| ENSG00000232656 | 1.407729925 | 0.697730409 | antisense          | 10 | 1068606   | 1090138 IDI2-AS1     |
| ENSG00000232662 | 0           | 0.390640832 | pseudogene         | 13 | 113930931 | 113932049 LDHBP1     |
| ENSG00000232671 | 1.799000381 | 2.242360793 | protein_coding     | 1  | 151252500 | 151254405            |
| ENSG00000232676 | 0           | 0.390640832 | pseudogene         | 1  | 79986765  | 79987888 ADH5P2      |
| ENSG00000232677 | 6.861834435 | 6.708116507 | lincRNA            | 19 | 36804644  | 36822602             |
| ENSG00000232679 | 0.869158192 | 0.950786998 | lincRNA            | 1  | 222215047 | 222238105            |
| ENSG00000232684 | 0.869158192 | 0.697730409 | antisense          | 13 | 113399763 | 113409007 ATP11A-AS1 |
| ENSG00000232686 | 1.16343121  | 0.950786998 | sense_intronic     | 1  | 235333435 | 235334206 ARID4B-IT1 |
| ENSG00000232687 | 0.869158192 | 0.950786998 | pseudogene         | 21 | 30500022  | 30500509 RPL12P9     |
| ENSG00000232692 | 1.16343121  | 0           | antisense          | 21 | 27750871  | 27844017             |
| ENSG00000232693 | 0.869158192 | 0.390640832 | processed_transc   | 2  | 65600834  | 65607819             |
| ENSG00000232698 | 2.238690726 | 2.501982735 | lincRNA            | 21 | 45626408  | 45627282             |
| ENSG00000232703 | 0.499066092 | 2.912743273 | lincRNA            | 6  | 31167942  | 31169695 LINC00481   |
| ENSG00000232706 | 0           | 0.390640832 | pseudogene         | 10 | 52439351  | 52446086             |
| ENSG00000232709 | 2.847891871 | 3.993387124 | pseudogene         | 10 | 94178424  | 94180632 MARK2P9     |
| ENSG00000232710 | 2.847891871 | 2.144285137 | sense_intronic     | 22 | 42532442  | 42535938             |
| ENSG00000232712 | 1.407729925 | 1.518964905 | lincRNA            | 20 | 21175044  | 21198927             |
| ENSG00000232713 | 2.671945279 | 2.501982735 | pseudogene         | 2  | 61165340  | 61165739             |
| ENSG00000232716 | 0.869158192 | 0.390640832 | pseudogene         | 7  | 130524963 | 130528484            |
| ENSG00000232718 | 0           | 0.390640832 | pseudogene         | 2  | 3735611   | 3736571 GAPDHP48     |

|                 |             |             |                  |    |           |                       |
|-----------------|-------------|-------------|------------------|----|-----------|-----------------------|
| ENSG00000232724 | 1.407729925 | 0           | pseudogene       | 17 | 73070401  | 73075644              |
| ENSG00000232725 | 4.642199401 | 4.448594745 | antisense        | X  | 153001080 | 153031933             |
| ENSG00000232727 | 0.499066092 | 0.390640832 | pseudogene       | 7  | 63894208  | 63894970              |
| ENSG00000232729 | 1.16343121  | 1.16600992  | processed_transc | 7  | 74103391  | 74143187              |
| ENSG00000232732 | 1.16343121  | 0.697730409 | processed_transc | 2  | 200732303 | 200775805             |
| ENSG00000232734 | 0.499066092 | 0           | pseudogene       | 10 | 71192728  | 71193127 ATP5G1P7     |
| ENSG00000232739 | 1.616589159 | 1.353254395 | antisense        | 10 | 15279491  | 15283766              |
| ENSG00000232742 | 0.869158192 | 0.697730409 | pseudogene       | 2  | 132218533 | 132219150 RHOQP2      |
| ENSG00000232745 | 0.499066092 | 0.697730409 | pseudogene       | 1  | 142803532 | 142827235 ANKRD20A14P |
| ENSG00000232746 | 0.499066092 | 0           | lincRNA          | 3  | 12919021  | 12926710              |
| ENSG00000232750 | 0           | 0.950786998 | pseudogene       | 1  | 179004443 | 179004787             |
| ENSG00000232751 | 0.499066092 | 1.16600992  | pseudogene       | 1  | 173320828 | 173321143             |
| ENSG00000232754 | 0           | 0.697730409 | antisense        | 22 | 41565194  | 41579148              |
| ENSG00000232755 | 3.211941663 | 2.039052734 | sense_intronic   | 9  | 111633250 | 111635485 IKBKAP-IT1  |
| ENSG00000232756 | 0           | 0.390640832 | antisense        | 7  | 77619701  | 77624488              |
| ENSG00000232757 | 0.869158192 | 0.697730409 | pseudogene       | 6  | 29999490  | 30000780 ETF1P1       |
| ENSG00000232759 | 7.461385447 | 7.4317778   | processed_transc | 7  | 22602956  | 22613615              |
| ENSG00000232762 | 0           | 1.16600992  | antisense        | 1  | 53770208  | 53773134              |
| ENSG00000232768 | 0           | 0.390640832 | pseudogene       | 1  | 31523719  | 31523881              |
| ENSG00000232769 | 4.062237333 | 5.236305879 | protein_coding   | X  | 108975929 | 108978188             |
| ENSG00000232774 | 2.238690726 | 1.518964905 | protein_coding   | 14 | 62037258  | 62125414              |
| ENSG00000232775 | 3.077135474 | 3.906303962 | pseudogene       | 22 | 16162066  | 16172700              |
| ENSG00000232777 | 0.499066092 | 0.390640832 | pseudogene       | 21 | 44535444  | 44535819 MRPL51P2     |
| ENSG00000232778 | 0           | 0.950786998 | pseudogene       | 6  | 108253004 | 108253458             |
| ENSG00000232780 | 0.499066092 | 0.697730409 | pseudogene       | 1  | 119977079 | 119977703             |
| ENSG00000232788 | 1.960915222 | 1.802319292 | antisense        | 2  | 173328990 | 173330750             |
| ENSG00000232794 | 0.869158192 | 0.697730409 | pseudogene       | X  | 63264185  | 63264938              |
| ENSG00000232795 | 0           | 0.697730409 | pseudogene       | 13 | 35759431  | 35760816 SCAND3P1     |
| ENSG00000232801 | 0.869158192 | 0.950786998 | pseudogene       | X  | 40749900  | 40750790              |
| ENSG00000232803 | 3.652182994 | 4.17820932  | antisense        | 20 | 61294371  | 61298076              |
| ENSG00000232807 | 2.10647801  | 2.652276565 | antisense        | 10 | 5979079   | 5987863               |
| ENSG00000232810 | 8.090308512 | 9.021555505 | protein_coding   | 6  | 31543344  | 31546113 TNF          |
| ENSG00000232811 | 3.989024711 | 3.232099092 | antisense        | 1  | 111486089 | 111495470             |
| ENSG00000232815 | 1.407729925 | 1.16600992  | pseudogene       | 9  | 68413482  | 68414196              |
| ENSG00000232818 | 4.593635215 | 4.744751758 | pseudogene       | 7  | 23530092  | 23530983 RPS2P32      |
| ENSG00000232823 | 0.499066092 | 0.697730409 | pseudogene       | 10 | 121442486 | 121443335             |
| ENSG00000232824 | 0           | 0.390640832 | pseudogene       | 1  | 198166909 | 198167316             |
| ENSG00000232828 | 0.499066092 | 0.390640832 | antisense        | X  | 48557354  | 48595570              |
| ENSG00000232830 | 0.499066092 | 0.390640832 | pseudogene       | 3  | 101133072 | 101133477             |
| ENSG00000232832 | 0.499066092 | 0           | antisense        | 3  | 197765192 | 197766105 LMLN-AS1    |
| ENSG00000232833 | 1.960915222 | 2.501982735 | pseudogene       | 9  | 67785049  | 67786624              |
| ENSG00000232837 | 0.499066092 | 0           | lincRNA          | 21 | 40346355  | 40349700              |
| ENSG00000232838 | 4.19837882  | 4.048652948 | protein_coding   | 20 | 18118499  | 18123810              |
| ENSG00000232842 | 0.499066092 | 0           | pseudogene       | X  | 95228333  | 95229313              |
| ENSG00000232843 | 0           | 0.390640832 | pseudogene       | 9  | 95655950  | 95656787 SNX18P2      |
| ENSG00000232846 | 0.499066092 | 0.697730409 | pseudogene       | 1  | 52174734  | 52175612              |
| ENSG00000232848 | 0.499066092 | 1.518964905 | pseudogene       | 1  | 8117305   | 8118523               |
| ENSG00000232850 | 0.499066092 | 0.950786998 | protein_coding   | 9  | 130890612 | 130891481             |
| ENSG00000232852 | 0           | 0.390640832 | pseudogene       | 20 | 62921540  | 62924351 CICP4        |
| ENSG00000232856 | 6.305850085 | 6.398170093 | protein_coding   | 7  | 132719291 | 132720699             |
| ENSG00000232858 | 0           | 0.950786998 | pseudogene       | 13 | 25562715  | 25563063 RPL34P27     |
| ENSG00000232859 | 4.165528823 | 4.566889334 | protein_coding   | 17 | 26205386  | 26220409 C17orf108    |
| ENSG00000232860 | 3.077135474 | 3.133298822 | processed_transc | 1  | 183430009 | 183441400             |
| ENSG00000232866 | 0           | 0.390640832 | pseudogene       | 9  | 44120111  | 44120522              |
| ENSG00000232868 | 0           | 0.950786998 | antisense        | 6  | 73437950  | 73438464 KCNQ5-AS2    |
| ENSG00000232871 | 2.57521082  | 1.925536307 | pseudogene       | 19 | 49141328  | 49184461              |
| ENSG00000232872 | 1.16343121  | 0.390640832 | pseudogene       | 13 | 52482354  | 52484757 CTAGE3P      |
| ENSG00000232873 | 0.499066092 | 0.697730409 | pseudogene       | 3  | 194283707 | 194284730             |
| ENSG00000232874 | 2.10647801  | 0.697730409 | antisense        | 3  | 193848405 | 193848990             |
| ENSG00000232875 | 0.499066092 | 0.390640832 | pseudogene       | 10 | 98675390  | 98675659 HMGN2P35     |
| ENSG00000232876 | 0           | 1.518964905 | antisense        | 6  | 135376171 | 135381688             |
| ENSG00000232879 | 0.869158192 | 0.697730409 | pseudogene       | 1  | 161004624 | 161004792             |
| ENSG00000232880 | 0.499066092 | 1.353254395 | pseudogene       | 20 | 44016987  | 44017345              |

|                 |             |             |                  |    |           |           |            |
|-----------------|-------------|-------------|------------------|----|-----------|-----------|------------|
| ENSG00000232882 | 0.499066092 | 0.697730409 | pseudogene       | 1  | 91358549  | 91359169  | PHKA1P1    |
| ENSG00000232883 | 1.616589159 | 1.667587519 | pseudogene       | 1  | 220490009 | 220490941 |            |
| ENSG00000232888 | 3.004694206 | 3.453019579 | pseudogene       | 12 | 133402287 | 133402772 | RPS11P5    |
| ENSG00000232892 | 0.499066092 | 0.950786998 | antisense        | 1  | 163131465 | 163182813 |            |
| ENSG00000232896 | 0.869158192 | 0.697730409 | lincRNA          | 9  | 113361755 | 113367499 |            |
| ENSG00000232897 | 0.499066092 | 1.16600992  | pseudogene       | 22 | 48058239  | 48059352  |            |
| ENSG00000232900 | 0           | 0.390640832 | processed_transc | 20 | 10855981  | 10889920  |            |
| ENSG00000232901 | 1.799000381 | 1.518964905 | pseudogene       | 3  | 10042331  | 10042624  |            |
| ENSG00000232906 | 2.10647801  | 1.925536307 | pseudogene       | 7  | 64820847  | 64822089  |            |
| ENSG00000232907 | 0.869158192 | 1.518964905 | processed_transc | 20 | 35136563  | 35201794  |            |
| ENSG00000232909 | 0.499066092 | 1.353254395 | antisense        | 6  | 35701644  | 35704724  |            |
| ENSG00000232911 | 0           | 0.390640832 | lincRNA          | 20 | 10845303  | 10847830  |            |
| ENSG00000232912 | 0.869158192 | 0.697730409 | antisense        | 1  | 8484705   | 8494898   |            |
| ENSG00000232913 | 1.16343121  | 0.390640832 | antisense        | 10 | 95841707  | 95868542  |            |
| ENSG00000232915 | 0.499066092 | 0.697730409 | pseudogene       | 2  | 139169636 | 139170888 |            |
| ENSG00000232916 | 0           | 0.390640832 | pseudogene       | 5  | 115553723 | 115553992 | HMG2P27    |
| ENSG00000232922 | 0.499066092 | 0           | pseudogene       | 7  | 112013788 | 112014305 |            |
| ENSG00000232926 | 2.57521082  | 2.652276565 | pseudogene       | 22 | 19874812  | 19875493  |            |
| ENSG00000232928 | 1.799000381 | 2.242360793 | pseudogene       | X  | 73340847  | 73351761  | DDX3YP1    |
| ENSG00000232931 | 6.379315619 | 6.310446475 | lincRNA          | 2  | 96472866  | 96481963  | LINC00342  |
| ENSG00000232932 | 1.16343121  | 1.16600992  | lincRNA          | 6  | 38130577  | 38131580  |            |
| ENSG00000232934 | 0.499066092 | 0.697730409 | antisense        | 10 | 114166052 | 114169252 |            |
| ENSG00000232935 | 0           | 0.390640832 | antisense        | 10 | 128811765 | 128814220 |            |
| ENSG00000232936 | 1.16343121  | 0.950786998 | antisense        | 10 | 91405039  | 91410424  |            |
| ENSG00000232938 | 1.16343121  | 0.697730409 | protein_coding   | 17 | 81174666  | 81188573  |            |
| ENSG00000232940 | 2.10647801  | 2.501982735 | antisense        | 6  | 33217311  | 33222766  | HCG25      |
| ENSG00000232944 | 1.960915222 | 1.353254395 | pseudogene       | 7  | 56476392  | 56476903  |            |
| ENSG00000232946 | 0           | 0.390640832 | pseudogene       | 9  | 6675284   | 6675614   |            |
| ENSG00000232949 | 4.800350936 | 4.777836593 | lincRNA          | 7  | 22629324  | 22631241  |            |
| ENSG00000232951 | 0.869158192 | 0.950786998 | pseudogene       | X  | 51664960  | 51665595  | IPO7P1     |
| ENSG00000232952 | 1.407729925 | 0.950786998 | pseudogene       | 1  | 106434361 | 106436139 |            |
| ENSG00000232953 | 0.499066092 | 0           | pseudogene       | 3  | 19981761  | 19984802  |            |
| ENSG00000232956 | 7.648344073 | 7.980592361 | protein_coding   | 7  | 45022632  | 45023864  | SNHG15     |
| ENSG00000232963 | 0           | 0.390640832 | pseudogene       | 2  | 24553271  | 24553543  | HMG2P20    |
| ENSG00000232970 | 1.16343121  | 0           | pseudogene       | 2  | 217021065 | 217021534 |            |
| ENSG00000232973 | 3.603959378 | 3.608232228 | antisense        | 2  | 38302791  | 38408997  | CYP1B1-AS1 |
| ENSG00000232987 | 1.960915222 | 1.353254395 | lincRNA          | 11 | 2012326   | 2014699   |            |
| ENSG00000232995 | 5.175139844 | 5.611474642 | processed_transc | 1  | 163117264 | 163291684 |            |
| ENSG00000232998 | 0.869158192 | 0           | antisense        | 9  | 79791672  | 79792910  |            |
| ENSG00000233002 | 0.499066092 | 0.390640832 | antisense        | 17 | 15638337  | 15647113  |            |
| ENSG00000233003 | 1.799000381 | 1.353254395 | pseudogene       | 1  | 228162980 | 228165866 |            |
| ENSG00000233006 | 4.842525946 | 4.961837817 | processed_transc | 5  | 131646978 | 131705608 |            |
| ENSG00000233008 | 0.499066092 | 0           | processed_transc | 1  | 84041459  | 84326706  |            |
| ENSG00000233009 | 4.292665995 | 3.027231696 | antisense        | 13 | 101360579 | 101711638 | NALCN-AS1  |
| ENSG00000233010 | 0.499066092 | 1.518964905 | pseudogene       | 22 | 30004889  | 30005490  |            |
| ENSG00000233016 | 8.217949183 | 8.513583123 | antisense        | 9  | 139615818 | 139622636 | SNHG7      |
| ENSG00000233025 | 2.847891871 | 2.912743273 | pseudogene       | 7  | 102729111 | 102730057 |            |
| ENSG00000233029 | 0           | 0.950786998 | processed_transc | 1  | 120924841 | 120933000 |            |
| ENSG00000233030 | 0.499066092 | 0.390640832 | antisense        | 1  | 149757215 | 149764576 |            |
| ENSG00000233033 | 0.499066092 | 0           | antisense        | X  | 41379289  | 41381589  | CASK-AS1   |
| ENSG00000233038 | 0.869158192 | 0           | antisense        | 7  | 157647221 | 157658784 |            |
| ENSG00000233040 | 0           | 0.390640832 | pseudogene       | 1  | 197715879 | 197716581 | FAM204BP   |
| ENSG00000233044 | 0           | 0.390640832 | antisense        | 6  | 157428861 | 157440840 |            |
| ENSG00000233045 | 1.407729925 | 1.16600992  | pseudogene       | 2  | 139036144 | 139036780 |            |
| ENSG00000233048 | 0           | 0.390640832 | lincRNA          | 20 | 12845850  | 12933167  |            |
| ENSG00000233056 | 2.35979773  | 2.242360793 | antisense        | 21 | 44336913  | 44345756  | ERVH48-1   |
| ENSG00000233057 | 1.16343121  | 1.802319292 | pseudogene       | 1  | 194158097 | 194159472 | EEF1A1P14  |
| ENSG00000233058 | 5.637181576 | 4.917990497 | processed_transc | 3  | 194208183 | 194239008 |            |
| ENSG00000233060 | 0.499066092 | 0           | lincRNA          | 2  | 70316853  | 70323232  |            |
| ENSG00000233061 | 0.869158192 | 0.697730409 | sense_intronic   | 1  | 84444801  | 84449983  | TTLL7-IT1  |
| ENSG00000233068 | 1.16343121  | 0.950786998 | lincRNA          | 6  | 3893360   | 3894524   |            |
| ENSG00000233069 | 0.499066092 | 0.390640832 | antisense        | 1  | 21059373  | 21060445  |            |
| ENSG00000233077 | 2.57521082  | 1.667587519 | processed_transc | 20 | 48927248  | 48937879  |            |



|                 |             |             |                  |    |           |                      |
|-----------------|-------------|-------------|------------------|----|-----------|----------------------|
| ENSG00000233080 | 4.322773689 | 4.15321211  | processed_transc | 22 | 35515817  | 35627049             |
| ENSG00000233081 | 0.499066092 | 0.950786998 | lincRNA          | 9  | 94188520  | 94189426             |
| ENSG00000233086 | 0           | 0.390640832 | lincRNA          | 9  | 82120719  | 82147257             |
| ENSG00000233087 | 1.799000381 | 1.16600992  | pseudogene       | 2  | 132118066 | 132121731            |
| ENSG00000233098 | 6.693459083 | 8.205465413 | processed_transc | 17 | 20771810  | 20901341             |
| ENSG00000233101 | 0.869158192 | 0           | antisense        | 17 | 46627247  | 46683776             |
| ENSG00000233104 | 0.869158192 | 1.353254395 | sense_intronic   | 10 | 72577323  | 72577968             |
| ENSG00000233108 | 0.869158192 | 0.390640832 | antisense        | 7  | 7997814   | 8009534              |
| ENSG00000233110 | 0.499066092 | 0.390640832 | antisense        | 4  | 186509063 | 186515157            |
| ENSG00000233111 | 0.869158192 | 0           | pseudogene       | 9  | 37636685  | 37637290 RAB1C       |
| ENSG00000233114 | 0.499066092 | 0           | pseudogene       | 1  | 46570628  | 46570847             |
| ENSG00000233117 | 2.238690726 | 2.144285137 | lincRNA          | 10 | 4277752   | 4285981              |
| ENSG00000233121 | 1.407729925 | 0.697730409 | pseudogene       | 3  | 13968310  | 13969275 VN1R20P     |
| ENSG00000233122 | 2.238690726 | 3.781359661 | pseudogene       | 10 | 131904273 | 131907095 CTAGE7P    |
| ENSG00000233125 | 0           | 0.390640832 | pseudogene       | 1  | 92694575  | 92694992 ACTBP12     |
| ENSG00000233133 | 0           | 0.697730409 | pseudogene       | 3  | 17747550  | 17747725             |
| ENSG00000233137 | 9.239397198 | 9.351881826 | lincRNA          | 9  | 37079893  | 37090398             |
| ENSG00000233144 | 0.499066092 | 0           | antisense        | 10 | 75141191  | 75143254             |
| ENSG00000233148 | 0           | 0.390640832 | pseudogene       | 9  | 35010683  | 35011361 SYF2P2      |
| ENSG00000233154 | 1.16343121  | 0.950786998 | lincRNA          | 1  | 116966346 | 117021464            |
| ENSG00000233155 | 1.616589159 | 1.353254395 | pseudogene       | 2  | 74645249  | 74645569 HMGA1P8     |
| ENSG00000233157 | 0           | 0.390640832 | pseudogene       | 22 | 44155079  | 44155790             |
| ENSG00000233163 | 0.869158192 | 0.697730409 | pseudogene       | 10 | 70921286  | 70921662             |
| ENSG00000233165 | 4.230497448 | 4.342020395 | processed_transc | 10 | 88725496  | 88729158             |
| ENSG00000233170 | 0           | 0.697730409 | pseudogene       | 8  | 37604854  | 37605522             |
| ENSG00000233173 | 0.499066092 | 0           | pseudogene       | 7  | 63394827  | 63395709 VN1R34P     |
| ENSG00000233177 | 6.032862302 | 6.720932357 | antisense        | 10 | 121331316 | 121334113            |
| ENSG00000233178 | 3.004694206 | 3.906303962 | antisense        | 9  | 71012849  | 71014187             |
| ENSG00000233184 | 4.883502971 | 5.496926774 | processed_transc | 1  | 101491409 | 101552821            |
| ENSG00000233189 | 0           | 0.950786998 | pseudogene       | 10 | 86148926  | 86149382             |
| ENSG00000233190 | 0           | 0.950786998 | pseudogene       | 10 | 32520777  | 32521173             |
| ENSG00000233191 | 0           | 0.697730409 | antisense        | 7  | 157305988 | 157309535            |
| ENSG00000233193 | 0           | 0.390640832 | lincRNA          | 17 | 15664928  | 15667083             |
| ENSG00000233196 | 0           | 0.950786998 | pseudogene       | 1  | 186549645 | 186550323            |
| ENSG00000233198 | 2.928422289 | 3.081239798 | protein_coding   | 9  | 140122018 | 140124090 RNF224     |
| ENSG00000233200 | 0.499066092 | 0.697730409 | lincRNA          | 10 | 35508822  | 35519526             |
| ENSG00000233202 | 0.869158192 | 0.697730409 | processed_transc | 7  | 2804242   | 2815134              |
| ENSG00000233203 | 1.16343121  | 0.697730409 | antisense        | 1  | 55353236  | 55354523             |
| ENSG00000233207 | 0.869158192 | 1.16600992  | antisense        | 9  | 42363048  | 42367092             |
| ENSG00000233216 | 0           | 0.390640832 | pseudogene       | 1  | 58694354  | 58694675             |
| ENSG00000233218 | 0.869158192 | 1.518964905 | pseudogene       | 1  | 142688379 | 142688925 SNX18P16   |
| ENSG00000233220 | 0.869158192 | 0.697730409 | processed_transc | 11 | 129872833 | 129874251 LINC00167  |
| ENSG00000233221 | 2.35979773  | 1.518964905 | processed_transc | 2  | 131588551 | 131594567            |
| ENSG00000233223 | 2.238690726 | 2.851901313 | antisense        | 17 | 7485282   | 7487390              |
| ENSG00000233224 | 1.16343121  | 1.353254395 | protein_coding   | 6  | 27860477  | 27860963 HIST1H2AM   |
| ENSG00000233225 | 1.16343121  | 0.697730409 | pseudogene       | 7  | 39872813  | 39874544             |
| ENSG00000233226 | 0.499066092 | 0.950786998 | antisense        | 13 | 33696713  | 33697797 STARD13-AS1 |
| ENSG00000233229 | 0.499066092 | 0           | pseudogene       | X  | 69157016  | 69157867             |
| ENSG00000233230 | 2.762599152 | 3.570966319 | antisense        | 2  | 48132817  | 48134949             |
| ENSG00000233231 | 2.928422289 | 2.652276565 | pseudogene       | 6  | 166748056 | 166748959            |
| ENSG00000233232 | 0.499066092 | 0.390640832 | protein_coding   | 16 | 28467693  | 28481868 NPIPL1      |
| ENSG00000233237 | 4.618121645 | 5.163066621 | processed_transc | 6  | 72054047  | 72130472 LINC00472   |
| ENSG00000233242 | 0           | 0.697730409 | antisense        | 9  | 37112915  | 37115487             |
| ENSG00000233246 | 0           | 0.390640832 | antisense        | 1  | 33815953  | 33828846             |
| ENSG00000233247 | 1.16343121  | 1.16600992  | pseudogene       | X  | 14262325  | 14263544             |
| ENSG00000233250 | 0.869158192 | 2.039052734 | antisense        | X  | 53459670  | 53459979             |
| ENSG00000233255 | 0           | 0.390640832 | antisense        | 2  | 165697259 | 165705844            |
| ENSG00000233260 | 0.499066092 | 0.390640832 | pseudogene       | X  | 132896823 | 132897710 RPSAP63    |
| ENSG00000233263 | 0.869158192 | 0.390640832 | pseudogene       | 7  | 131577375 | 131578374            |
| ENSG00000233264 | 2.35979773  | 1.353254395 | pseudogene       | 7  | 8019943   | 8021859              |
| ENSG00000233266 | 1.407729925 | 0.950786998 | pseudogene       | 2  | 54278471  | 54278897 HMGB1P31    |
| ENSG00000233270 | 1.407729925 | 1.353254395 | pseudogene       | 19 | 5576671   | 5576949 SNRPEP4      |
| ENSG00000233275 | 0           | 0.697730409 | pseudogene       | 2  | 96100507  | 96100861             |

|                 |             |             |                    |    |           |           |              |
|-----------------|-------------|-------------|--------------------|----|-----------|-----------|--------------|
| ENSG00000233276 | 10.45802494 | 10.65506157 | protein_coding     | 3  | 49394609  | 49396033  | GPX1         |
| ENSG00000233278 | 0           | 0.697730409 | pseudogene         | 9  | 30831876  | 30832223  | RPS26P2      |
| ENSG00000233280 | 5.613019223 | 5.792353798 | protein_coding     | 3  | 97540884  | 97594133  |              |
| ENSG00000233286 | 0           | 0.390640832 | pseudogene         | 2  | 120970511 | 120970851 | MTND3P10     |
| ENSG00000233287 | 0.499066092 | 0           | pseudogene         | 7  | 130927349 | 130927754 |              |
| ENSG00000233288 | 3.502389126 | 4.101879561 | lincRNA            | 7  | 56601923  | 56605823  |              |
| ENSG00000233292 | 0.499066092 | 0.390640832 | pseudogene         | 10 | 90898801  | 90899215  |              |
| ENSG00000233296 | 1.407729925 | 1.353254395 | processed_transc   | 2  | 677186    | 697371    |              |
| ENSG00000233303 | 0.499066092 | 0.950786998 | antisense          | 3  | 194815317 | 194816786 |              |
| ENSG00000233307 | 0.499066092 | 0.390640832 | pseudogene         | 2  | 110490308 | 110490713 |              |
| ENSG00000233325 | 2.671945279 | 2.788380093 | pseudogene         | 13 | 21872398  | 21880512  | MIPEPP3      |
| ENSG00000233326 | 0.499066092 | 0.950786998 | sense_intronic     | 9  | 21803282  | 21813885  |              |
| ENSG00000233327 | 3.652182994 | 3.87606762  | processed_transc   | 17 | 18414535  | 18445234  |              |
| ENSG00000233328 | 4.230497448 | 4.693656882 | pseudogene         | 1  | 171639420 | 171640079 | PFN1P1       |
| ENSG00000233330 | 1.616589159 | 1.925536307 | antisense          | 6  | 149912891 | 149913799 |              |
| ENSG00000233337 | 0.869158192 | 2.334191469 | pseudogene         | 1  | 111980136 | 111980659 |              |
| ENSG00000233339 | 0           | 0.697730409 | antisense          | 2  | 106795998 | 106800253 |              |
| ENSG00000233343 | 0           | 0.390640832 | pseudogene         | 10 | 35447234  | 35447568  | ATP6V1G1P4   |
| ENSG00000233346 | 0           | 1.518964905 | antisense          | 10 | 114172053 | 114179765 |              |
| ENSG00000233347 | 1.16343121  | 1.353254395 | pseudogene         | 20 | 50726883  | 50727588  | ERP29P1      |
| ENSG00000233360 | 1.960915222 | 0.950786998 | antisense          | 22 | 38037839  | 38054384  |              |
| ENSG00000233368 | 3.274897671 | 4.250702764 | lincRNA            | 1  | 149576591 | 149577296 |              |
| ENSG00000233369 | 2.57521082  | 2.501982735 | pseudogene         | 7  | 72569033  | 72619657  |              |
| ENSG00000233377 | 0           | 0.390640832 | pseudogene         | 10 | 96700010  | 96700878  | MTND4P20     |
| ENSG00000233380 | 2.35979773  | 1.802319292 | pseudogene         | 17 | 51834350  | 51835231  |              |
| ENSG00000233381 | 3.211941663 | 3.183544561 | pseudogene         | 12 | 31768702  | 31769373  | AK4P3        |
| ENSG00000233382 | 4.292665995 | 4.489113623 | processed_transc X |    | 119254863 | 119379122 | NKAPP1       |
| ENSG00000233383 | 0.499066092 | 0.390640832 | pseudogene         | 7  | 66554244  | 66554457  |              |
| ENSG00000233384 | 1.16343121  | 0.390640832 | antisense          | 1  | 224802998 | 224803922 |              |
| ENSG00000233385 | 0           | 0.390640832 | pseudogene         | 7  | 63566443  | 63567197  |              |
| ENSG00000233387 | 0           | 0.697730409 | lincRNA            | 10 | 33385185  | 33405600  |              |
| ENSG00000233388 | 1.16343121  | 2.039052734 | pseudogene         | 22 | 35897908  | 35899633  |              |
| ENSG00000233393 | 1.960915222 | 0.390640832 | lincRNA            | 21 | 37477179  | 37481988  |              |
| ENSG00000233396 | 2.671945279 | 2.912743273 | lincRNA            | 1  | 145376125 | 145382397 |              |
| ENSG00000233404 | 8.770222845 | 8.214555999 | protein_coding     | 2  | 102508955 | 102511150 |              |
| ENSG00000233405 | 0.499066092 | 0           | lincRNA            | 13 | 21808707  | 21809343  |              |
| ENSG00000233406 | 2.762599152 | 2.242360793 | pseudogene         | 1  | 51716275  | 51717144  |              |
| ENSG00000233411 | 0.499066092 | 0           | sense_intronic     | 1  | 167426620 | 167427898 |              |
| ENSG00000233416 | 0.869158192 | 0           | pseudogene         | 2  | 20806040  | 20806414  |              |
| ENSG00000233421 | 1.16343121  | 0.697730409 | processed_transc   | 1  | 16860381  | 16862144  |              |
| ENSG00000233426 | 2.35979773  | 2.788380093 | pseudogene         | 2  | 58478575  | 58479703  | EIF3FP3      |
| ENSG00000233430 | 0           | 0.697730409 | lincRNA            | 1  | 149305910 | 149313076 |              |
| ENSG00000233432 | 0.499066092 | 0           | pseudogene         | 1  | 121244142 | 121245691 |              |
| ENSG00000233435 | 0           | 0.697730409 | pseudogene         | 10 | 135455590 | 135456398 | AGGF1P2      |
| ENSG00000233436 | 1.407729925 | 1.802319292 | protein_coding     | 11 | 57510990  | 57519253  | BTBD18       |
| ENSG00000233438 | 0           | 1.16600992  | protein_coding     | 2  | 27760253  | 27790011  |              |
| ENSG00000233440 | 5.986594255 | 5.306006045 | pseudogene         | 13 | 23708313  | 23709394  | HMG1A1P6     |
| ENSG00000233452 | 2.471521042 | 1.925536307 | processed_transc   | 6  | 147163702 | 147525750 |              |
| ENSG00000233457 | 0           | 0.390640832 | pseudogene         | 9  | 80765448  | 80766109  |              |
| ENSG00000233459 | 0.869158192 | 0.390640832 | pseudogene         | 2  | 204499300 | 204500739 |              |
| ENSG00000233461 | 5.91922012  | 6.057793599 | antisense          | 1  | 231658134 | 231664302 |              |
| ENSG00000233467 | 1.407729925 | 0           | pseudogene X       |    | 147279534 | 147280398 |              |
| ENSG00000233469 | 0.869158192 | 1.353254395 | pseudogene         | 13 | 20392261  | 20392759  | ST6GALNAC4P1 |
| ENSG00000233471 | 0           | 0.950786998 | pseudogene         | 22 | 19245043  | 19246329  |              |
| ENSG00000233476 | 4.409500985 | 4.888000647 | pseudogene         | 7  | 22550231  | 22551618  | EEF1A1P6     |
| ENSG00000233478 | 0.869158192 | 0.697730409 | antisense          | 1  | 25971035  | 25985602  |              |
| ENSG00000233483 | 1.16343121  | 1.802319292 | pseudogene         | 17 | 43324751  | 43328496  |              |
| ENSG00000233487 | 0.499066092 | 0.697730409 | pseudogene         | 3  | 196710761 | 196714429 |              |
| ENSG00000233488 | 5.729976786 | 4.903073497 | protein_coding     | 2  | 111994581 | 111996624 |              |
| ENSG00000233491 | 0.869158192 | 0           | processed_transc   | 7  | 81205702  | 81255532  |              |
| ENSG00000233493 | 5.036678094 | 5.41517489  | protein_coding     | 19 | 55890613  | 55895627  | TMEM238      |
| ENSG00000233496 | 0.869158192 | 0.950786998 | sense_intronic     | 6  | 158422139 | 158423415 | SYNJ2-IT1    |
| ENSG00000233497 | 0.869158192 | 0.697730409 | pseudogene         | 11 | 110658749 | 110659735 |              |

|                 |             |             |                  |    |           |                       |
|-----------------|-------------|-------------|------------------|----|-----------|-----------------------|
| ENSG00000233503 | 0.499066092 | 0           | pseudogene       | 6  | 7481327   | 7482827               |
| ENSG00000233509 | 0           | 0.390640832 | antisense        | 3  | 44658620  | 44666289 ZNF197-AS1   |
| ENSG00000233511 | 0.499066092 | 0.390640832 | pseudogene       | 6  | 108573418 | 108573604             |
| ENSG00000233514 | 0.499066092 | 0.950786998 | pseudogene       | 1  | 44587825  | 44588184              |
| ENSG00000233521 | 5.498982484 | 7.421346415 | lincRNA          | 22 | 27617310  | 27620688              |
| ENSG00000233524 | 0.499066092 | 0.697730409 | pseudogene       | 13 | 21321174  | 21322196 RANP8        |
| ENSG00000233527 | 4.381167248 | 4.385599336 | protein_coding   | 19 | 37063972  | 37085608              |
| ENSG00000233529 | 0           | 0.390640832 | antisense        | 6  | 30913756  | 30922639 HCG21        |
| ENSG00000233532 | 6.032862302 | 5.808454063 | lincRNA          | 13 | 107028911 | 107030565 LINC00460   |
| ENSG00000233538 | 1.16343121  | 1.667587519 | protein_coding   | 2  | 232316906 | 232317864             |
| ENSG00000233541 | 0.499066092 | 0           | pseudogene       | 11 | 122921869 | 122922109 RPL31P47    |
| ENSG00000233543 | 0.499066092 | 0           | pseudogene       | X  | 44492938  | 44494478 CHTF8P1      |
| ENSG00000233547 | 1.407729925 | 1.518964905 | antisense        | 10 | 114710405 | 114711634             |
| ENSG00000233554 | 2.35979773  | 2.334191469 | antisense        | 9  | 33166973  | 33179981              |
| ENSG00000233558 | 0.869158192 | 0.390640832 | pseudogene       | 6  | 116579656 | 116580278             |
| ENSG00000233559 | 3.274897671 | 2.971122874 | processed_transc | 7  | 130538479 | 130613408             |
| ENSG00000233560 | 3.211941663 | 3.493416095 | pseudogene       | 12 | 69099414  | 69100846 KRT8P22      |
| ENSG00000233578 | 1.616589159 | 1.802319292 | pseudogene       | 20 | 5529486   | 5530127               |
| ENSG00000233579 | 0.499066092 | 0.390640832 | pseudogene       | 2  | 203705054 | 203706504 KRT8P15     |
| ENSG00000233585 | 1.799000381 | 1.16600992  | pseudogene       | X  | 48634408  | 48635385              |
| ENSG00000233588 | 1.16343121  | 0.697730409 | pseudogene       | 13 | 29296523  | 29298158 CYP51P2      |
| ENSG00000233589 | 2.762599152 | 2.242360793 | antisense        | 1  | 68944812  | 68949222              |
| ENSG00000233593 | 3.78787645  | 4.777836593 | processed_transc | 1  | 91295104  | 91317207              |
| ENSG00000233597 | 2.471521042 | 2.721932731 | pseudogene       | 3  | 141762465 | 141763040             |
| ENSG00000233602 | 0.869158192 | 1.353254395 | sense_intronic   | 1  | 44709080  | 44709945 ERI3-IT1     |
| ENSG00000233603 | 0.499066092 | 0.390640832 | pseudogene       | 22 | 41194043  | 41194289 JTBP1        |
| ENSG00000233608 | 0.499066092 | 0.390640832 | protein_coding   | 2  | 239756673 | 239795893 TWIST2      |
| ENSG00000233613 | 1.616589159 | 0.697730409 | antisense        | 13 | 114123216 | 114130450 DCUN1D2-AS2 |
| ENSG00000233614 | 0           | 0.390640832 | pseudogene       | 16 | 61553     | 64093                 |
| ENSG00000233615 | 0.499066092 | 0           | pseudogene       | 1  | 241082953 | 241083909             |
| ENSG00000233621 | 5.270908378 | 4.29708397  | antisense        | 1  | 37920480  | 37940012              |
| ENSG00000233622 | 2.238690726 | 1.925536307 | pseudogene       | 19 | 41314430  | 41317295 CYP2T2P      |
| ENSG00000233623 | 0.869158192 | 0           | pseudogene       | 1  | 10118729  | 10119710 PGAM1P11     |
| ENSG00000233625 | 0.499066092 | 0.390640832 | lincRNA          | 20 | 17868007  | 17868804              |
| ENSG00000233626 | 0           | 1.16600992  | pseudogene       | 1  | 212109591 | 212109978             |
| ENSG00000233635 | 0.499066092 | 0           | antisense        | 17 | 61271291  | 61275146              |
| ENSG00000233646 | 0.499066092 | 0           | pseudogene       | 11 | 5587908   | 5588846 OR52T1P       |
| ENSG00000233647 | 0.499066092 | 0.390640832 | pseudogene       | 1  | 47131584  | 47132082              |
| ENSG00000233654 | 1.16343121  | 0.950786998 | antisense        | 2  | 191399581 | 191432828             |
| ENSG00000233657 | 0.869158192 | 0.697730409 | pseudogene       | 9  | 45432259  | 45432748              |
| ENSG00000233661 | 0           | 0.390640832 | antisense        | X  | 62569525  | 62572057 SPIN4-AS1    |
| ENSG00000233667 | 0           | 0.697730409 | pseudogene       | 9  | 69730536  | 69731237              |
| ENSG00000233668 | 0.869158192 | 0.950786998 | pseudogene       | 9  | 34223982  | 34224626              |
| ENSG00000233671 | 0.499066092 | 0           | pseudogene       | 2  | 87448236  | 87449611              |
| ENSG00000233672 | 0.869158192 | 1.518964905 | antisense        | 13 | 51456514  | 51484848 RNASEH2B-AS1 |
| ENSG00000233673 | 1.799000381 | 1.16600992  | pseudogene       | 2  | 87098424  | 87149816              |
| ENSG00000233674 | 0           | 0.390640832 | pseudogene       | 1  | 44209100  | 44209409              |
| ENSG00000233677 | 0.499066092 | 0           | pseudogene       | 6  | 29874320  | 29874686 DDX39BP1     |
| ENSG00000233680 | 0.869158192 | 0.697730409 | pseudogene       | X  | 100142632 | 100143580 HNRNPA1P27  |
| ENSG00000233685 | 1.616589159 | 2.851901313 | pseudogene       | 10 | 135388626 | 135389535             |
| ENSG00000233690 | 2.471521042 | 1.802319292 | pseudogene       | 10 | 101457164 | 101457706             |
| ENSG00000233693 | 0.869158192 | 0.390640832 | antisense        | 1  | 164738353 | 164743878             |
| ENSG00000233694 | 1.16343121  | 0.697730409 | processed_transc | 2  | 64834109  | 64843616              |
| ENSG00000233695 | 4.999881834 | 5.339632724 | antisense        | 13 | 114518603 | 114542321 GAS6-AS1    |
| ENSG00000233705 | 0.499066092 | 0.697730409 | processed_transc | 7  | 107297075 | 107302596             |
| ENSG00000233708 | 0           | 0.697730409 | pseudogene       | 1  | 43352268  | 43354438              |
| ENSG00000233713 | 0           | 0.390640832 | pseudogene       | 9  | 88747566  | 88747766              |
| ENSG00000233716 | 0.869158192 | 0.390640832 | pseudogene       | 2  | 63459588  | 63460712              |
| ENSG00000233717 | 0           | 0.390640832 | pseudogene       | 1  | 151084388 | 151085204             |
| ENSG00000233718 | 0.499066092 | 0.390640832 | antisense        | 2  | 16061159  | 16082371 MYCNOS       |
| ENSG00000233719 | 3.448790144 | 4.021284656 | pseudogene       | 12 | 9794398   | 9795603 GOT2P3        |
| ENSG00000233723 | 0           | 0.697730409 | lincRNA          | 2  | 58654934  | 59290901              |
| ENSG00000233750 | 0           | 0.950786998 | pseudogene       | 1  | 131104    | 133923                |

|                 |             |             |                  |    |           |           |            |
|-----------------|-------------|-------------|------------------|----|-----------|-----------|------------|
| ENSG00000233754 | 0           | 0.390640832 | lincRNA          | 21 | 44201184  | 44202343  |            |
| ENSG00000233757 | 4.165528823 | 3.453019579 | lincRNA          | 2  | 95873283  | 95881351  |            |
| ENSG00000233760 | 0.869158192 | 0.697730409 | lincRNA          | 7  | 26591441  | 26596819  |            |
| ENSG00000233762 | 6.086493765 | 6.123616685 | pseudogene       | 2  | 172373749 | 172374232 |            |
| ENSG00000233765 | 2.238690726 | 1.518964905 | pseudogene       | 9  | 70662044  | 70663084  |            |
| ENSG00000233767 | 0.499066092 | 1.518964905 | pseudogene       | 21 | 47491999  | 47492162  | PSMA6P3    |
| ENSG00000233771 | 1.16343121  | 0.390640832 | pseudogene       | 1  | 224135302 | 224138118 | CICP5      |
| ENSG00000233773 | 1.16343121  | 1.16600992  | pseudogene       | 9  | 69731594  | 69734116  |            |
| ENSG00000233776 | 0.869158192 | 0.390640832 | antisense        | 9  | 33732973  | 33738414  |            |
| ENSG00000233783 | 0           | 0.950786998 | antisense        | 21 | 27306612  | 27307584  |            |
| ENSG00000233785 | 1.16343121  | 0.697730409 | antisense        | X  | 23791109  | 23801073  |            |
| ENSG00000233786 | 1.799000381 | 1.353254395 | pseudogene       | 2  | 133019901 | 133020615 | CDC27P1    |
| ENSG00000233791 | 0.499066092 | 0.390640832 | processed_transc | 1  | 203267886 | 203274437 |            |
| ENSG00000233797 | 0           | 0.390640832 | antisense        | 6  | 96806250  | 96969545  | UFL1-AS1   |
| ENSG00000233799 | 1.616589159 | 1.518964905 | antisense        | 4  | 758275    | 758862    |            |
| ENSG00000233806 | 1.16343121  | 2.334191469 | processed_transc | 2  | 242823514 | 243020873 |            |
| ENSG00000233817 | 1.616589159 | 1.802319292 | processed_transc | 9  | 116381508 | 116384914 |            |
| ENSG00000233818 | 2.762599152 | 3.845183986 | antisense        | 21 | 37818029  | 37904706  |            |
| ENSG00000233820 | 4.165528823 | 4.508954154 | pseudogene       | 9  | 99488172  | 99489449  |            |
| ENSG00000233822 | 3.335220907 | 3.679994897 | protein_coding   | 6  | 27806323  | 27819974  | HIST1H2BN  |
| ENSG00000233825 | 0           | 1.16600992  | antisense        | 10 | 32635427  | 32636107  |            |
| ENSG00000233828 | 0           | 0.390640832 | protein_coding   | 5  | 86512423  | 86534822  |            |
| ENSG00000233830 | 2.57521082  | 1.518964905 | pseudogene       | 7  | 27497782  | 27498468  |            |
| ENSG00000233833 | 0           | 0.390640832 | pseudogene       | X  | 65014187  | 65015677  |            |
| ENSG00000233834 | 0.869158192 | 0           | processed_transc | 7  | 20257200  | 20261323  |            |
| ENSG00000233836 | 5.806547963 | 5.901455548 | pseudogene       | 19 | 23945746  | 24016116  |            |
| ENSG00000233837 | 1.407729925 | 1.16600992  | pseudogene       | 10 | 43062125  | 43062931  | EIF3LP2    |
| ENSG00000233838 | 0.499066092 | 0.697730409 | pseudogene       | 20 | 61476490  | 61477543  | DPH3P1     |
| ENSG00000233839 | 1.16343121  | 0           | pseudogene       | 1  | 113711616 | 113712025 |            |
| ENSG00000233844 | 2.35979773  | 2.501982735 | sense_intronic   | 6  | 73340223  | 73388282  | KCNQ5-IT1  |
| ENSG00000233845 | 1.407729925 | 2.039052734 | antisense        | 2  | 47262418  | 47267663  |            |
| ENSG00000233846 | 0.869158192 | 0.390640832 | pseudogene       | 9  | 6278667   | 6279153   |            |
| ENSG00000233847 | 0.499066092 | 0           | antisense        | 5  | 60213317  | 60215400  |            |
| ENSG00000233848 | 0           | 0.390640832 | antisense        | 6  | 20756334  | 20800925  |            |
| ENSG00000233851 | 0.499066092 | 0.390640832 | antisense        | 13 | 21579296  | 21592261  | LATS2-AS1  |
| ENSG00000233852 | 1.407729925 | 0.950786998 | lincRNA          | 17 | 13836037  | 13843911  |            |
| ENSG00000233858 | 0.499066092 | 0.697730409 | lincRNA          | 8  | 49502961  | 49700220  |            |
| ENSG00000233859 | 0.869158192 | 0.390640832 | pseudogene       | 6  | 66546823  | 66547947  | ADH5P4     |
| ENSG00000233862 | 1.16343121  | 0.950786998 | antisense        | 2  | 30273932  | 30366670  |            |
| ENSG00000233868 | 0           | 0.697730409 | pseudogene       | 2  | 222808942 | 222809331 |            |
| ENSG00000233871 | 1.616589159 | 2.039052734 | antisense        | 10 | 79687130  | 79689582  |            |
| ENSG00000233873 | 0.869158192 | 1.353254395 | pseudogene       | 13 | 77555310  | 77556051  | RPL7P44    |
| ENSG00000233876 | 0           | 0.390640832 | pseudogene       | 7  | 9654608   | 9655615   | GAPDHP68   |
| ENSG00000233878 | 0.499066092 | 0.950786998 | lincRNA          | 7  | 156230483 | 156238282 |            |
| ENSG00000233885 | 0.499066092 | 1.353254395 | antisense        | 3  | 183525552 | 183526729 | YEATS2-AS1 |
| ENSG00000233887 | 0           | 0.390640832 | pseudogene       | X  | 97102261  | 97104015  |            |
| ENSG00000233892 | 2.10647801  | 2.144285137 | pseudogene       | 6  | 30154575  | 30156391  | PAIP1P1    |
| ENSG00000233893 | 0.869158192 | 0           | antisense        | 6  | 159239043 | 159241625 |            |
| ENSG00000233895 | 1.616589159 | 2.334191469 | lincRNA          | 20 | 19738352  | 19790319  |            |
| ENSG00000233899 | 3.448790144 | 3.081239798 | processed_transc | 22 | 39532704  | 39537189  |            |
| ENSG00000233901 | 6.509364082 | 4.489113623 | lincRNA          | 9  | 132094579 | 132121817 |            |
| ENSG00000233902 | 0           | 0.390640832 | pseudogene       | 6  | 31430505  | 31431113  |            |
| ENSG00000233903 | 3.989024711 | 4.29708397  | lincRNA          | 22 | 42672361  | 42673057  |            |
| ENSG00000233912 | 1.16343121  | 1.802319292 | antisense        | 3  | 5198590   | 5229014   |            |
| ENSG00000233913 | 3.652182994 | 3.813624741 | pseudogene       | 5  | 168043317 | 168044059 |            |
| ENSG00000233916 | 0           | 0.390640832 | pseudogene       | 6  | 29675902  | 29676324  | ZDHC20P1   |
| ENSG00000233922 | 1.799000381 | 1.16600992  | processed_transc | 21 | 47013568  | 47017005  |            |
| ENSG00000233924 | 0.869158192 | 1.353254395 | pseudogene       | 14 | 55471531  | 55472405  |            |
| ENSG00000233926 | 0.499066092 | 0.390640832 | processed_transc | 9  | 84304628  | 84391815  |            |
| ENSG00000233927 | 6.305850085 | 7.449853178 | protein_coding   | 19 | 8386384   | 8387809   | RPS28      |
| ENSG00000233929 | 0.869158192 | 1.802319292 | pseudogene       | 1  | 16567708  | 16567893  | MT1XP1     |
| ENSG00000233930 | 1.960915222 | 2.242360793 | processed_transc | 11 | 1592583   | 1620414   |            |
| ENSG00000233937 | 4.883502971 | 5.372493443 | antisense        | 5  | 180673523 | 180699168 |            |

|                 |             |             |                  |    |           |           |              |
|-----------------|-------------|-------------|------------------|----|-----------|-----------|--------------|
| ENSG00000233939 | 0.499066092 | 0           | pseudogene       | 2  | 106921211 | 106921653 |              |
| ENSG00000233944 | 0.499066092 | 0.390640832 | pseudogene       | Y  | 27539301  | 27540203  | LINC00265-3P |
| ENSG00000233954 | 3.211941663 | 3.411459265 | pseudogene       | 1  | 16133679  | 16134194  |              |
| ENSG00000233956 | 0.869158192 | 0.697730409 | pseudogene       | 21 | 34890917  | 34891415  | BTF3P6       |
| ENSG00000233961 | 3.211941663 | 3.608232228 | pseudogene       | 9  | 69065655  | 69084989  |              |
| ENSG00000233966 | 3.146112541 | 3.368666104 | pseudogene       | 17 | 15607546  | 15608214  |              |
| ENSG00000233967 | 1.960915222 | 2.652276565 | lincRNA          | 6  | 81153061  | 81175644  |              |
| ENSG00000233970 | 0.499066092 | 0           | antisense        | 2  | 692083    | 693235    |              |
| ENSG00000233971 | 1.16343121  | 1.16600992  | pseudogene       | 2  | 72211312  | 72211564  |              |
| ENSG00000233974 | 1.616589159 | 0.950786998 | pseudogene       | 5  | 21481436  | 21484120  |              |
| ENSG00000233975 | 0           | 0.950786998 | lincRNA          | 1  | 27986839  | 27989233  |              |
| ENSG00000233977 | 0           | 0.390640832 | lincRNA          | 7  | 55659767  | 55660886  |              |
| ENSG00000233979 | 0.499066092 | 0.697730409 | pseudogene       | 17 | 15987356  | 15987695  |              |
| ENSG00000233984 | 2.35979773  | 3.279072565 | pseudogene       | X  | 73251297  | 73251655  | RPSAP14      |
| ENSG00000233986 | 2.35979773  | 1.353254395 | antisense        | 17 | 76489237  | 76495428  |              |
| ENSG00000233990 | 0.499066092 | 0.390640832 | pseudogene       | 10 | 7875581   | 7875920   |              |
| ENSG00000233991 | 2.35979773  | 0.950786998 | pseudogene       | 2  | 91777536  | 91809447  |              |
| ENSG00000233993 | 0.499066092 | 0.950786998 | antisense        | 20 | 18655039  | 18679353  |              |
| ENSG00000233994 | 0.499066092 | 0.697730409 | pseudogene       | 1  | 72740235  | 72740838  | GDI2P2       |
| ENSG00000233998 | 1.16343121  | 1.353254395 | pseudogene       | 9  | 140535438 | 140535999 | SETP5        |
| ENSG00000234003 | 2.847891871 | 1.925536307 | pseudogene       | 19 | 12617063  | 12618844  |              |
| ENSG00000234004 | 0.869158192 | 0.697730409 | pseudogene       | 1  | 211346819 | 211347193 |              |
| ENSG00000234005 | 0.499066092 | 0           | pseudogene       | 13 | 99842833  | 99843245  | GAPDHP22     |
| ENSG00000234006 | 0           | 0.697730409 | antisense        | 6  | 31510081  | 31510915  | DDX39B-AS1   |
| ENSG00000234008 | 0.869158192 | 0           | pseudogene       | 21 | 37259493  | 37260105  | PPP1R2P2     |
| ENSG00000234009 | 1.16343121  | 1.802319292 | pseudogene       | 22 | 43172412  | 43173302  |              |
| ENSG00000234011 | 1.616589159 | 2.334191469 | lincRNA          | 20 | 44076042  | 44076982  |              |
| ENSG00000234015 | 0           | 0.390640832 | lincRNA          | 6  | 12583147  | 12585636  |              |
| ENSG00000234017 | 0.869158192 | 1.667587519 | pseudogene       | 10 | 114308391 | 114308631 |              |
| ENSG00000234019 | 0           | 0.390640832 | lincRNA          | X  | 53122892  | 53124040  |              |
| ENSG00000234026 | 0           | 0.390640832 | processed_transc | 10 | 96988000  | 96990901  |              |
| ENSG00000234028 | 3.393122761 | 3.279072565 | processed_transc | 2  | 88927057  | 88931337  |              |
| ENSG00000234034 | 0           | 0.390640832 | lincRNA          | 21 | 23872924  | 23892377  |              |
| ENSG00000234035 | 0.499066092 | 0           | lincRNA          | 21 | 40285093  | 40287072  |              |
| ENSG00000234036 | 2.238690726 | 0.390640832 | pseudogene       | 4  | 77880013  | 77880322  |              |
| ENSG00000234038 | 0.499066092 | 1.16600992  | pseudogene       | 15 | 32885854  | 32886380  |              |
| ENSG00000234040 | 0.869158192 | 0.950786998 | pseudogene       | 12 | 69020657  | 69020969  |              |
| ENSG00000234041 | 1.16343121  | 1.518964905 | pseudogene       | 1  | 179106899 | 179107069 |              |
| ENSG00000234042 | 0.499066092 | 1.16600992  | pseudogene       | 9  | 68298799  | 68299489  |              |
| ENSG00000234043 | 2.10647801  | 2.420525079 | pseudogene       | 10 | 92912362  | 92913106  |              |
| ENSG00000234055 | 0.499066092 | 0.950786998 | antisense        | 9  | 131860133 | 131862545 |              |
| ENSG00000234062 | 5.072559152 | 5.526427614 | processed_transc | X  | 135991554 | 136103789 |              |
| ENSG00000234065 | 1.407729925 | 0.697730409 | pseudogene       | 2  | 120971207 | 120972565 | MTND4P26     |
| ENSG00000234070 | 0.499066092 | 0           | antisense        | 1  | 217954540 | 217958462 |              |
| ENSG00000234072 | 5.707331524 | 5.871116342 | processed_transc | 2  | 27579113  | 27590489  |              |
| ENSG00000234073 | 0.499066092 | 0.390640832 | pseudogene       | 3  | 36921675  | 36922220  |              |
| ENSG00000234075 | 0.869158192 | 0.390640832 | pseudogene       | 20 | 46106958  | 46107754  | RPL35AP      |
| ENSG00000234076 | 1.407729925 | 1.518964905 | lincRNA          | 3  | 188659504 | 188665428 | TPRG1-AS1    |
| ENSG00000234080 | 1.407729925 | 1.16600992  | pseudogene       | 1  | 50791803  | 50792682  |              |
| ENSG00000234084 | 2.10647801  | 2.039052734 | antisense        | 6  | 135622706 | 135628296 |              |
| ENSG00000234093 | 0.869158192 | 1.518964905 | pseudogene       | 1  | 45245998  | 45246387  |              |
| ENSG00000234111 | 0           | 0.390640832 | lincRNA          | 4  | 158493642 | 158497306 |              |
| ENSG00000234112 | 0.869158192 | 0.697730409 | pseudogene       | 1  | 225990850 | 225991155 |              |
| ENSG00000234115 | 0.869158192 | 0           | pseudogene       | 6  | 7516833   | 7518073   |              |
| ENSG00000234118 | 0.499066092 | 1.518964905 | pseudogene       | 10 | 112696380 | 112696991 | RPL13AP6     |
| ENSG00000234127 | 9.700687762 | 9.667587501 | protein_coding   | 6  | 30152232  | 30181204  | TRIM26       |
| ENSG00000234129 | 2.238690726 | 2.652276565 | processed_transc | X  | 10981960  | 11129258  |              |
| ENSG00000234130 | 0           | 1.16600992  | pseudogene       | X  | 92477217  | 92480014  |              |
| ENSG00000234133 | 0.869158192 | 0.390640832 | lincRNA          | 7  | 30586782  | 30590397  |              |
| ENSG00000234134 | 1.407729925 | 2.039052734 | antisense        | 10 | 127407340 | 127407934 |              |
| ENSG00000234135 | 0.869158192 | 0.390640832 | pseudogene       | X  | 56269369  | 56269842  | RPL23AP83    |
| ENSG00000234136 | 0.869158192 | 0.390640832 | antisense        | 3  | 197557556 | 197558167 |              |
| ENSG00000234139 | 0.499066092 | 0.390640832 | lincRNA          | 20 | 34660363  | 34673182  |              |

|                 |             |             |                  |    |           |                    |
|-----------------|-------------|-------------|------------------|----|-----------|--------------------|
| ENSG00000234141 | 0.499066092 | 0.697730409 | antisense        | 7  | 7989484   | 7990340            |
| ENSG00000234142 | 0.869158192 | 0.697730409 | lincRNA          | 1  | 166445009 | 166459276          |
| ENSG00000234145 | 0           | 0.390640832 | pseudogene       | 13 | 48337595  | 48338741 NAP1L4P3  |
| ENSG00000234147 | 5.286269488 | 5.938503778 | lincRNA          | 6  | 141167095 | 141174061          |
| ENSG00000234148 | 0           | 0.390640832 | lincRNA          | 2  | 114270040 | 114273062          |
| ENSG00000234149 | 0           | 0.390640832 | antisense        | 10 | 76762813  | 76784932           |
| ENSG00000234155 | 2.238690726 | 1.802319292 | lincRNA          | 6  | 86096937  | 86099904           |
| ENSG00000234159 | 0           | 0.697730409 | pseudogene       | 21 | 17116323  | 17117399 RBPMSLP   |
| ENSG00000234160 | 5.741167503 | 5.611474642 | antisense        | 9  | 37509147  | 37510296           |
| ENSG00000234163 | 0           | 0.390640832 | pseudogene       | 10 | 33312296  | 33312575           |
| ENSG00000234167 | 0           | 0.390640832 | pseudogene       | 10 | 34777511  | 34777806 TCEB2P4   |
| ENSG00000234169 | 0           | 0.390640832 | lincRNA          | 2  | 101286354 | 101292500          |
| ENSG00000234171 | 7.030950614 | 6.495854971 | processed_transc | 2  | 3606082   | 3609324            |
| ENSG00000234174 | 0.499066092 | 0.697730409 | antisense        | 2  | 113929112 | 113932937          |
| ENSG00000234175 | 0.869158192 | 1.16600992  | pseudogene       | 10 | 13181196  | 13181533           |
| ENSG00000234176 | 0.869158192 | 1.667587519 | pseudogene       | X  | 120337036 | 120338868 HSPA8P1  |
| ENSG00000234181 | 0           | 0.697730409 | antisense        | 9  | 35096375  | 35098138           |
| ENSG00000234183 | 0.499066092 | 1.16600992  | antisense        | 7  | 44888015  | 44889167           |
| ENSG00000234185 | 1.407729925 | 0.697730409 | antisense        | 7  | 65584590  | 65593711           |
| ENSG00000234187 | 0           | 0.390640832 | pseudogene       | 20 | 14108046  | 14108982 SCYE1P    |
| ENSG00000234193 | 1.16343121  | 0.697730409 | antisense        | 2  | 223782105 | 223784081          |
| ENSG00000234197 | 1.16343121  | 0.390640832 | antisense        | 3  | 185796959 | 185798736 ETV5-AS1 |
| ENSG00000234198 | 1.616589159 | 1.802319292 | processed_transc | 2  | 69871557  | 70008692           |
| ENSG00000234199 | 0           | 0.390640832 | lincRNA          | 2  | 114737146 | 114764879          |
| ENSG00000234203 | 0           | 0.697730409 | antisense        | 17 | 4876146   | 4877976            |
| ENSG00000234206 | 0.499066092 | 0.390640832 | antisense        | 6  | 107831007 | 107832925          |
| ENSG00000234208 | 0.499066092 | 0           | processed_transc | 22 | 29909878  | 29931379           |
| ENSG00000234210 | 0.499066092 | 1.16600992  | lincRNA          | 7  | 157258925 | 157292410          |
| ENSG00000234213 | 0           | 0.950786998 | pseudogene       | 13 | 42830009  | 42830711 FHP1      |
| ENSG00000234219 | 0.499066092 | 0.390640832 | pseudogene       | 1  | 207935929 | 207936608          |
| ENSG00000234222 | 1.960915222 | 2.144285137 | antisense        | 1  | 145486272 | 145508262          |
| ENSG00000234225 | 1.407729925 | 1.667587519 | lincRNA          | 1  | 146473499 | 146475178          |
| ENSG00000234230 | 0.869158192 | 0.950786998 | antisense        | X  | 24164342  | 24167771 ZFX-AS1   |
| ENSG00000234231 | 3.004694206 | 3.32456471  | pseudogene       | 2  | 88000503  | 88038766           |
| ENSG00000234234 | 0           | 0.390640832 | pseudogene       | 7  | 63568207  | 63568864           |
| ENSG00000234235 | 0           | 0.390640832 | antisense        | 2  | 242483818 | 242498392 BOK-AS1  |
| ENSG00000234236 | 1.16343121  | 2.144285137 | antisense        | 9  | 127103208 | 127103792          |
| ENSG00000234237 | 0           | 0.697730409 | protein_coding   | 1  | 180941695 | 180949868          |
| ENSG00000234241 | 2.238690726 | 0.950786998 | pseudogene       | 20 | 6194346   | 6196028            |
| ENSG00000234256 | 0           | 0.390640832 | pseudogene       | 10 | 90636207  | 90637193           |
| ENSG00000234263 | 0           | 0.950786998 | antisense        | 6  | 136950310 | 136969137          |
| ENSG00000234264 | 1.407729925 | 1.667587519 | processed_transc | 1  | 68962359  | 69004310           |
| ENSG00000234268 | 0.869158192 | 1.667587519 | pseudogene       | 11 | 116906513 | 116906767          |
| ENSG00000234270 | 0           | 0.697730409 | pseudogene       | 3  | 41996937  | 41997255           |
| ENSG00000234271 | 0.869158192 | 0.390640832 | pseudogene       | 20 | 42151901  | 42152212           |
| ENSG00000234272 | 0.499066092 | 0.390640832 | pseudogene       | 2  | 152988069 | 152988359          |
| ENSG00000234274 | 0           | 0.697730409 | pseudogene       | 20 | 34438596  | 34438837 COX7BP2   |
| ENSG00000234277 | 4.026095388 | 4.489113623 | processed_transc | 1  | 227581292 | 227618736          |
| ENSG00000234281 | 0.499066092 | 1.802319292 | antisense        | 2  | 211189483 | 211333970          |
| ENSG00000234284 | 4.261916566 | 5.564846512 | protein_coding   | 5  | 178450753 | 178462065 ZNF879   |
| ENSG00000234286 | 0           | 1.16600992  | antisense        | 7  | 23719814  | 23720405           |
| ENSG00000234287 | 0.499066092 | 0.390640832 | pseudogene       | 3  | 40803036  | 40803290           |
| ENSG00000234288 | 0           | 0.697730409 | pseudogene       | X  | 130558273 | 130559188 OR1AA1P  |
| ENSG00000234289 | 0.499066092 | 0           | pseudogene       | 21 | 44985120  | 44985500 H2BFS     |
| ENSG00000234290 | 4.131913373 | 4.15321211  | antisense        | 5  | 131804579 | 131808735          |
| ENSG00000234292 | 2.238690726 | 2.420525079 | lincRNA          | 5  | 90575914  | 90576959           |
| ENSG00000234297 | 0           | 0.390640832 | pseudogene       | 9  | 15055054  | 15056032           |
| ENSG00000234298 | 0           | 1.518964905 | protein_coding   | 18 | 44548658  | 44550534 TCEB3CL   |
| ENSG00000234311 | 3.004694206 | 2.420525079 | antisense        | 10 | 134247237 | 134254988          |
| ENSG00000234318 | 0.499066092 | 0.697730409 | lincRNA          | 1  | 63361680  | 63367310           |
| ENSG00000234319 | 0.499066092 | 0           | pseudogene       | 10 | 81975607  | 81975875           |
| ENSG00000234322 | 0           | 0.390640832 | pseudogene       | X  | 92542732  | 92543758 ST13P18   |
| ENSG00000234323 | 0.499066092 | 0           | lincRNA          | 9  | 109040673 | 109367076          |

|                 |             |             |                    |    |           |                     |
|-----------------|-------------|-------------|--------------------|----|-----------|---------------------|
| ENSG00000234324 | 0.499066092 | 1.925536307 | pseudogene         | 17 | 15346953  | 15347505            |
| ENSG00000234327 | 5.255381949 | 6.097646709 | antisense          | 17 | 5015227   | 5017672             |
| ENSG00000234329 | 1.407729925 | 1.802319292 | pseudogene         | 1  | 46116711  | 46117498            |
| ENSG00000234332 | 0           | 0.697730409 | pseudogene         | 1  | 100858589 | 100859582 BCAS2P2   |
| ENSG00000234335 | 1.616589159 | 2.501982735 | pseudogene         | 10 | 32391450  | 32392221            |
| ENSG00000234337 | 0.499066092 | 0.697730409 | pseudogene         | 16 | 52689216  | 52689962            |
| ENSG00000234338 | 3.077135474 | 2.851901313 | pseudogene         | 7  | 64295658  | 64297260            |
| ENSG00000234350 | 0.869158192 | 1.925536307 | processed_transc   | 2  | 171579719 | 171627276           |
| ENSG00000234353 | 2.928422289 | 2.334191469 | pseudogene         | 22 | 23980679  | 23982949            |
| ENSG00000234354 | 0           | 0.390640832 | pseudogene         | 13 | 101192089 | 101192528 RPS26P47  |
| ENSG00000234356 | 0.499066092 | 0.390640832 | pseudogene         | 7  | 10516208  | 10516505            |
| ENSG00000234358 | 0.869158192 | 1.16600992  | pseudogene         | 7  | 111611277 | 111612043           |
| ENSG00000234361 | 0.869158192 | 0.697730409 | antisense          | 6  | 158250175 | 158251605           |
| ENSG00000234362 | 0.869158192 | 0.390640832 | lincRNA            | 2  | 42158739  | 42160863            |
| ENSG00000234367 | 1.407729925 | 1.925536307 | pseudogene         | 1  | 148349256 | 148349657 PFN1P3    |
| ENSG00000234369 | 0.499066092 | 0           | pseudogene         | 10 | 64981915  | 64982805            |
| ENSG00000234371 | 0.499066092 | 0.390640832 | pseudogene         | 3  | 183602712 | 183606237           |
| ENSG00000234373 | 1.16343121  | 1.667587519 | pseudogene         | 9  | 33576378  | 33577012 SNX18P7    |
| ENSG00000234374 | 0.499066092 | 0           | antisense          | 1  | 9961518   | 9962174             |
| ENSG00000234377 | 0.869158192 | 1.518964905 | antisense          | 13 | 79152611  | 79193239 POU4F1-AS1 |
| ENSG00000234378 | 0           | 0.390640832 | lincRNA            | 2  | 20263617  | 20306590            |
| ENSG00000234380 | 3.911897206 | 4.406904905 | antisense          | 21 | 36118054  | 36157183            |
| ENSG00000234382 | 0.499066092 | 0.390640832 | pseudogene         | 10 | 81993420  | 82005123            |
| ENSG00000234383 | 0.869158192 | 2.652276565 | pseudogene         | 1  | 68627444  | 68628773            |
| ENSG00000234384 | 3.004694206 | 2.721932731 | lincRNA            | 13 | 91145541  | 91187334            |
| ENSG00000234390 | 3.603959378 | 3.232099092 | processed_transc X |    | 49641892  | 49643844            |
| ENSG00000234393 | 0.499066092 | 0.390640832 | antisense          | 10 | 115470440 | 115479091           |
| ENSG00000234396 | 0.499066092 | 0           | processed_transc   | 1  | 2143962   | 2152175             |
| ENSG00000234397 | 0.869158192 | 0.390640832 | pseudogene         | 1  | 22649333  | 22649824            |
| ENSG00000234402 | 0           | 0.697730409 | pseudogene         | 14 | 106012947 | 106016031 ELK2BP    |
| ENSG00000234405 | 0.869158192 | 0.697730409 | antisense X        |    | 102752451 | 102755245           |
| ENSG00000234409 | 3.830412367 | 3.411459265 | protein_coding     | 22 | 20135970  | 20138399            |
| ENSG00000234419 | 2.762599152 | 1.802319292 | pseudogene         | 1  | 222641436 | 222644224 CICIP13   |
| ENSG00000234420 | 6.343050432 | 6.475832214 | pseudogene         | 10 | 43015073  | 43048270 ZNF37BP    |
| ENSG00000234422 | 0           | 0.390640832 | pseudogene         | 1  | 96884150  | 96884489 UBE2WP1    |
| ENSG00000234424 | 0.499066092 | 0           | pseudogene         | 9  | 88368221  | 88401490            |
| ENSG00000234428 | 0.499066092 | 2.039052734 | antisense          | 12 | 26776302  | 26802412            |
| ENSG00000234429 | 0.499066092 | 0.390640832 | pseudogene         | 2  | 81421461  | 81428308            |
| ENSG00000234431 | 3.871730003 | 4.676215056 | lincRNA            | 2  | 202031688 | 202032269           |
| ENSG00000234432 | 4.517578978 | 5.212303549 | protein_coding     | 7  | 5465916   | 5468558             |
| ENSG00000234434 | 0           | 0.390640832 | pseudogene         | 9  | 44880901  | 44881742            |
| ENSG00000234437 | 0           | 0.390640832 | processed_transc   | 1  | 169411876 | 169429690           |
| ENSG00000234439 | 0.499066092 | 0.390640832 | pseudogene         | 21 | 21797261  | 21798518 KRT18P2    |
| ENSG00000234444 | 5.869093502 | 5.683080141 | protein_coding     | 7  | 63767837  | 63810017 ZNF736     |
| ENSG00000234450 | 1.16343121  | 1.925536307 | pseudogene         | 7  | 156426049 | 156426481           |
| ENSG00000234453 | 0           | 0.390640832 | antisense          | 1  | 234086184 | 234086853           |
| ENSG00000234456 | 2.10647801  | 0           | processed_transc   | 7  | 79082198  | 79100524 MAGI2-AS3  |
| ENSG00000234459 | 0           | 0.697730409 | antisense          | 7  | 89895348  | 89899530            |
| ENSG00000234460 | 0.869158192 | 0.390640832 | lincRNA            | 9  | 90479081  | 90481205            |
| ENSG00000234465 | 1.616589159 | 2.242360793 | protein_coding     | 19 | 44084696  | 44088114            |
| ENSG00000234473 | 0.499066092 | 0           | pseudogene         | 1  | 192962579 | 192963807           |
| ENSG00000234476 | 1.407729925 | 0.697730409 | sense_intronic     | 1  | 225634945 | 225653045           |
| ENSG00000234477 | 0.499066092 | 0           | antisense          | 17 | 39077682  | 39132178            |
| ENSG00000234478 | 0.869158192 | 1.353254395 | antisense          | 1  | 226335704 | 226342772           |
| ENSG00000234483 | 1.16343121  | 0.390640832 | antisense          | 2  | 179501287 | 179578965           |
| ENSG00000234484 | 0.499066092 | 0           | antisense          | 6  | 133073814 | 133075090 VNN2-AS1  |
| ENSG00000234491 | 0.499066092 | 0.390640832 | pseudogene         | 2  | 207284016 | 207284962           |
| ENSG00000234492 | 0.499066092 | 0.950786998 | processed_transc   | 4  | 109459346 | 109541616           |
| ENSG00000234494 | 3.911897206 | 4.385599336 | antisense          | 17 | 45975826  | 46018776            |
| ENSG00000234498 | 3.502389126 | 3.368666104 | pseudogene         | 12 | 13028433  | 13029044 RPL13AP20  |
| ENSG00000234500 | 2.847891871 | 2.579085888 | pseudogene         | 7  | 65976543  | 66010053            |
| ENSG00000234509 | 0.869158192 | 0.950786998 | processed_transc   | 21 | 33025906  | 33031813            |
| ENSG00000234511 | 1.16343121  | 0           | protein_coding     | 5  | 169659451 | 169679579 C5orf58   |

|                 |             |             |                  |    |           |                       |
|-----------------|-------------|-------------|------------------|----|-----------|-----------------------|
| ENSG00000234513 | 0.869158192 | 0.950786998 | pseudogene       | 7  | 22813265  | 22813612              |
| ENSG00000234515 | 0           | 0.697730409 | pseudogene       | 6  | 32846948  | 32847625 PPP1R2P1     |
| ENSG00000234518 | 2.57521082  | 3.453019579 | pseudogene       | 1  | 89569968  | 89570450              |
| ENSG00000234520 | 0           | 0.950786998 | lincRNA          | 7  | 112594701 | 112635689             |
| ENSG00000234531 | 0           | 0.390640832 | 3prime_overlapp  | 10 | 134596683 | 134598269             |
| ENSG00000234536 | 1.616589159 | 1.518964905 | pseudogene       | 7  | 45813194  | 45822756              |
| ENSG00000234537 | 0.499066092 | 1.802319292 | pseudogene       | 9  | 94894680  | 94900911              |
| ENSG00000234543 | 3.830412367 | 3.532712221 | processed_transc | 9  | 96301210  | 96322860              |
| ENSG00000234545 | 7.751556534 | 7.84081624  | protein_coding   | 7  | 92190107  | 92219708 FAM133B      |
| ENSG00000234552 | 0           | 0.697730409 | pseudogene       | 17 | 14095430  | 14095681              |
| ENSG00000234558 | 0.499066092 | 0.390640832 | pseudogene       | X  | 115238174 | 115239683 API5P1      |
| ENSG00000234562 | 0.499066092 | 0           | pseudogene       | 3  | 42187138  | 42187863              |
| ENSG00000234569 | 0           | 0.390640832 | pseudogene       | 10 | 121380580 | 121381392             |
| ENSG00000234572 | 0.499066092 | 0           | lincRNA          | 2  | 65073264  | 65090760              |
| ENSG00000234584 | 0.499066092 | 0.950786998 | lincRNA          | 2  | 158582220 | 158592517             |
| ENSG00000234585 | 6.393570237 | 6.371325053 | pseudogene       | 7  | 64498732  | 64535091 CCT6P3       |
| ENSG00000234589 | 0.499066092 | 1.16600992  | pseudogene       | 12 | 3180698   | 3181314               |
| ENSG00000234593 | 2.928422289 | 1.353254395 | lincRNA          | 1  | 14675450  | 14677518              |
| ENSG00000234602 | 3.211941663 | 1.667587519 | protein_coding   | 5  | 54515442  | 54523143              |
| ENSG00000234607 | 0           | 0.390640832 | pseudogene       | 1  | 16296124  | 16296691              |
| ENSG00000234608 | 5.270908378 | 5.125003832 | lincRNA          | 12 | 112277571 | 112280706 C12orf47    |
| ENSG00000234610 | 5.107569429 | 5.212303549 | lincRNA          | 1  | 146986158 | 146989699             |
| ENSG00000234614 | 4.464551814 | 3.714580548 | antisense        | 1  | 151814353 | 151822861             |
| ENSG00000234616 | 8.114176072 | 8.374509343 | processed_transc | 8  | 143738874 | 143763386 JRK         |
| ENSG00000234617 | 0.499066092 | 0.390640832 | antisense        | 3  | 43391136  | 43393454 SNRK-AS1     |
| ENSG00000234618 | 2.10647801  | 2.579085888 | pseudogene       | 9  | 79013615  | 79014502              |
| ENSG00000234619 | 1.407729925 | 1.667587519 | pseudogene       | 1  | 8810489   | 8811146               |
| ENSG00000234622 | 3.077135474 | 4.250702764 | lincRNA          | X  | 1886240   | 1887669               |
| ENSG00000234624 | 0           | 0.697730409 | pseudogene       | 2  | 61644023  | 61644332              |
| ENSG00000234626 | 3.871730003 | 3.133298822 | antisense        | 22 | 32723158  | 32739092              |
| ENSG00000234629 | 0.499066092 | 0           | pseudogene       | 3  | 94655930  | 94656868 WDR82P1      |
| ENSG00000234630 | 1.799000381 | 2.721932731 | lincRNA          | 22 | 22648098  | 22649159              |
| ENSG00000234635 | 3.78787645  | 3.453019579 | lincRNA          | 10 | 70237755  | 70240521              |
| ENSG00000234636 | 3.830412367 | 3.64455972  | antisense        | X  | 40594652  | 40597950 MED14-AS1    |
| ENSG00000234638 | 0           | 0.390640832 | antisense        | 2  | 220289793 | 220290906             |
| ENSG00000234643 | 0.869158192 | 0           | pseudogene       | 21 | 11180920  | 11181815 EIF3FP1      |
| ENSG00000234645 | 1.16343121  | 1.16600992  | pseudogene       | 2  | 139045599 | 139046363             |
| ENSG00000234648 | 2.238690726 | 1.802319292 | pseudogene       | 14 | 99439651  | 99439808              |
| ENSG00000234650 | 0           | 0.390640832 | antisense        | 13 | 101116694 | 101133411 PCCA-AS1    |
| ENSG00000234654 | 0.499066092 | 0.697730409 | pseudogene       | 1  | 143245823 | 143246210             |
| ENSG00000234664 | 0           | 0.390640832 | pseudogene       | 15 | 30022917  | 30023189 HMGN2P5      |
| ENSG00000234665 | 3.146112541 | 4.075511708 | processed_transc | 9  | 66523532  | 66553911              |
| ENSG00000234667 | 1.407729925 | 0.697730409 | pseudogene       | 3  | 49910780  | 49915413              |
| ENSG00000234678 | 3.603959378 | 3.570966319 | antisense        | 1  | 201969222 | 201979481             |
| ENSG00000234684 | 5.879259127 | 6.192713747 | processed_transc | 20 | 1306065   | 1358827 FKBP1A-SDCBP2 |
| ENSG00000234685 | 0           | 0.390640832 | pseudogene       | 13 | 23489790  | 23490662 NUS1P2       |
| ENSG00000234689 | 0           | 0.697730409 | lincRNA          | 13 | 48479464  | 48481492 LINC00444    |
| ENSG00000234690 | 1.16343121  | 1.16600992  | processed_transc | 2  | 47419544  | 47572213              |
| ENSG00000234692 | 0           | 0.697730409 | lincRNA          | 9  | 118014817 | 118016530             |
| ENSG00000234693 | 0.499066092 | 0.390640832 | antisense        | 20 | 49262008  | 49278812              |
| ENSG00000234694 | 3.448790144 | 3.081239798 | antisense        | 1  | 43820355  | 43824329              |
| ENSG00000234695 | 1.407729925 | 0.950786998 | antisense        | 7  | 93520225  | 93522913              |
| ENSG00000234698 | 0           | 0.950786998 | lincRNA          | 20 | 48782899  | 48788279              |
| ENSG00000234699 | 1.616589159 | 2.334191469 | antisense        | 10 | 105212603 | 105222452             |
| ENSG00000234700 | 0           | 0.697730409 | pseudogene       | 7  | 63569003  | 63570525              |
| ENSG00000234705 | 1.16343121  | 0.950786998 | antisense        | 9  | 131425413 | 131425857 HMGA1P4     |
| ENSG00000234707 | 0           | 0.697730409 | antisense        | 7  | 54827118  | 54827621              |
| ENSG00000234709 | 1.799000381 | 1.802319292 | pseudogene       | 9  | 102760587 | 102761351 UPF3AP3     |
| ENSG00000234718 | 0           | 0.390640832 | processed_transc | 7  | 7778165   | 7781786               |
| ENSG00000234719 | 2.928422289 | 2.039052734 | protein_coding   | 16 | 12021230  | 12070500              |
| ENSG00000234722 | 2.35979773  | 2.420525079 | lincRNA          | 7  | 153097005 | 153111048             |
| ENSG00000234724 | 1.16343121  | 0.390640832 | pseudogene       | 10 | 95897505  | 95899257              |
| ENSG00000234737 | 0.499066092 | 0           | pseudogene       | 3  | 32300432  | 32301722 KRT18P15     |



|                 |             |              |                  |    |           |           |           |
|-----------------|-------------|--------------|------------------|----|-----------|-----------|-----------|
| ENSG00000234741 | 9.600559263 | 10.16279805  | non_coding       | 1  | 173833038 | 173838020 | GASS      |
| ENSG00000234742 | 2.238690726 | 2.501982735  | pseudogene       | 3  | 197577271 | 197577825 |           |
| ENSG00000234743 | 1.407729925 | 1.353254395  | pseudogene       | 10 | 82006975  | 82007439  |           |
| ENSG00000234745 | 12.99922746 | 14.448902777 | protein_coding   | 6  | 31321649  | 31324965  | HLA-B     |
| ENSG00000234747 | 3.830412367 | 4.127774132  | antisense        | 20 | 57476354  | 57476982  |           |
| ENSG00000234750 | 3.911897206 | 3.570966319  | pseudogene       | 19 | 12395152  | 12396000  |           |
| ENSG00000234751 | 0.499066092 | 0.697730409  | pseudogene       | 11 | 72651543  | 72652157  |           |
| ENSG00000234753 | 4.352265886 | 4.826083323  | antisense        | 6  | 41462591  | 41516359  |           |
| ENSG00000234754 | 2.10647801  | 1.802319292  | lincRNA          | 1  | 221503422 | 221509638 |           |
| ENSG00000234756 | 0.499066092 | 0            | lincRNA          | 10 | 64049280  | 64063792  |           |
| ENSG00000234757 | 0.869158192 | 0.697730409  | pseudogene       | 22 | 20486312  | 20488882  |           |
| ENSG00000234769 | 6.766474304 | 7.03670965   | protein_coding   | 16 | 64043     | 69452     | WASH4P    |
| ENSG00000234770 | 0           | 0.390640832  | pseudogene       | 8  | 27417791  | 27446590  | GULOP     |
| ENSG00000234771 | 6.861834435 | 5.98174124   | antisense        | 9  | 130873450 | 130881013 |           |
| ENSG00000234772 | 0           | 0.697730409  | antisense        | 13 | 27810419  | 27810948  |           |
| ENSG00000234773 | 6.482942724 | 6.25865215   | processed_transc | 19 | 12305830  | 12348582  |           |
| ENSG00000234776 | 0.869158192 | 1.353254395  | protein_coding   | 11 | 45928085  | 45928833  | C11orf94  |
| ENSG00000234779 | 2.238690726 | 2.652276565  | antisense        | 9  | 16726812  | 16727522  |           |
| ENSG00000234782 | 0.499066092 | 1.353254395  | pseudogene       | 9  | 120845142 | 120845660 |           |
| ENSG00000234784 | 0.499066092 | 0.390640832  | pseudogene       | 1  | 65384125  | 65384369  |           |
| ENSG00000234785 | 1.799000381 | 1.802319292  | pseudogene       | X  | 114937131 | 114938440 |           |
| ENSG00000234788 | 0.869158192 | 0.697730409  | pseudogene       | 10 | 27003551  | 27004761  |           |
| ENSG00000234789 | 1.16343121  | 0.950786998  | antisense        | 9  | 132402755 | 132403561 |           |
| ENSG00000234790 | 0.499066092 | 0            | pseudogene       | 1  | 113290717 | 113291097 |           |
| ENSG00000234793 | 0.869158192 | 0.697730409  | processed_transc | 2  | 242694208 | 242695155 |           |
| ENSG00000234797 | 0.499066092 | 1.518964905  | pseudogene       | 15 | 60060543  | 60061347  | RPS3AP6   |
| ENSG00000234800 | 0           | 0.697730409  | pseudogene       | 7  | 23760930  | 23761401  | PCMTD1P3  |
| ENSG00000234801 | 0           | 0.697730409  | pseudogene       | 4  | 174537087 | 174538057 | MORF4     |
| ENSG00000234805 | 0           | 0.390640832  | pseudogene       | 3  | 194476318 | 194478151 |           |
| ENSG00000234806 | 2.10647801  | 1.353254395  | pseudogene       | 10 | 70184317  | 70184754  |           |
| ENSG00000234807 | 0.869158192 | 0.697730409  | processed_transc | 1  | 59250823  | 59366668  |           |
| ENSG00000234814 | 3.698846687 | 4.274079748  | pseudogene       | 10 | 30960495  | 31006195  |           |
| ENSG00000234817 | 1.960915222 | 1.353254395  | processed_transc | 6  | 4136306   | 4157619   |           |
| ENSG00000234818 | 0           | 0.390640832  | antisense        | 2  | 10729292  | 10744956  |           |
| ENSG00000234819 | 1.16343121  | 3.96493948   | pseudogene       | 9  | 80834036  | 80834273  |           |
| ENSG00000234823 | 0           | 0.390640832  | lincRNA          | 6  | 155135    | 156639    |           |
| ENSG00000234825 | 2.847891871 | 2.579085888  | pseudogene       | X  | 149399291 | 149401116 |           |
| ENSG00000234832 | 2.238690726 | 1.925536307  | antisense        | 20 | 23327578  | 23332123  |           |
| ENSG00000234835 | 0           | 0.390640832  | pseudogene       | 13 | 35825207  | 35825966  | PHBP13    |
| ENSG00000234838 | 0           | 0.697730409  | pseudogene       | 5  | 65867885  | 65868374  |           |
| ENSG00000234840 | 2.238690726 | 2.501982735  | processed_transc | 9  | 22646199  | 22824212  |           |
| ENSG00000234841 | 1.407729925 | 0.950786998  | pseudogene       | 4  | 113747463 | 113748760 |           |
| ENSG00000234842 | 2.238690726 | 1.16600992   | pseudogene       | 2  | 202414354 | 202415030 |           |
| ENSG00000234848 | 0.869158192 | 0.390640832  | antisense        | 19 | 12561749  | 12571519  |           |
| ENSG00000234851 | 0.499066092 | 1.16600992   | pseudogene       | 3  | 161146915 | 161147398 |           |
| ENSG00000234854 | 0.499066092 | 0            | antisense        | 13 | 110380629 | 110382354 |           |
| ENSG00000234857 | 2.762599152 | 2.501982735  | protein_coding   | 11 | 62457747  | 62494856  |           |
| ENSG00000234866 | 0           | 0.697730409  | antisense        | 1  | 43221886  | 43222881  |           |
| ENSG00000234869 | 4.437288965 | 4.976162367  | antisense        | 22 | 46937392  | 46944093  |           |
| ENSG00000234880 | 1.799000381 | 0.697730409  | lincRNA          | 21 | 46409779  | 46414001  | LINC00163 |
| ENSG00000234882 | 2.57521082  | 2.501982735  | pseudogene       | 6  | 74001685  | 74003000  | EIF3EP1   |
| ENSG00000234883 | 0           | 0.390640832  | non_coding       | 21 | 26934221  | 26947480  | MIR155HG  |
| ENSG00000234884 | 0           | 0.390640832  | antisense        | 22 | 25957084  | 25960429  |           |
| ENSG00000234886 | 0           | 0.390640832  | pseudogene       | X  | 102057969 | 102061066 | MTND5P26  |
| ENSG00000234896 | 0.869158192 | 0            | pseudogene       | 2  | 71282657  | 71283133  |           |
| ENSG00000234899 | 0.869158192 | 1.518964905  | processed_transc | 17 | 70067183  | 70216859  |           |
| ENSG00000234900 | 0           | 0.697730409  | lincRNA          | 20 | 10733926  | 10745934  |           |
| ENSG00000234902 | 2.847891871 | 1.802319292  | lincRNA          | 2  | 208051441 | 208100790 |           |
| ENSG00000234911 | 2.847891871 | 3.714580548  | pseudogene       | 14 | 64812889  | 64841384  | TEX21P    |
| ENSG00000234912 | 6.171673665 | 6.465715653  | processed_transc | 17 | 75082798  | 75095278  | LINC00338 |
| ENSG00000234913 | 0           | 1.16600992   | sense_intronic   | 22 | 18487036  | 18490074  |           |
| ENSG00000234917 | 1.799000381 | 2.144285137  | lincRNA          | 1  | 43144406  | 43147325  |           |
| ENSG00000234921 | 0.499066092 | 0            | antisense        | 9  | 126793903 | 126794803 |           |

|                 |             |             |                  |    |           |                     |
|-----------------|-------------|-------------|------------------|----|-----------|---------------------|
| ENSG00000234925 | 0.499066092 | 1.518964905 | pseudogene       | 12 | 69036299  | 69036773            |
| ENSG00000234928 | 0.499066092 | 0.697730409 | lincRNA          | 22 | 23775751  | 23777258            |
| ENSG00000234933 | 0           | 0.697730409 | pseudogene       | 20 | 32989955  | 32990502 CDC42P1    |
| ENSG00000234936 | 1.616589159 | 1.667587519 | antisense        | 2  | 43456712  | 43460533            |
| ENSG00000234937 | 0.869158192 | 0.390640832 | pseudogene       | 1  | 155815158 | 155816415           |
| ENSG00000234944 | 2.471521042 | 2.420525079 | lincRNA          | 10 | 43366969  | 43369508            |
| ENSG00000234945 | 0.869158192 | 0.950786998 | antisense        | 2  | 27558409  | 27560670            |
| ENSG00000234946 | 0.869158192 | 0.390640832 | pseudogene       | 2  | 24166716  | 24167221            |
| ENSG00000234948 | 0           | 0.697730409 | processed_transc | 20 | 50827184  | 51266970            |
| ENSG00000234949 | 2.35979773  | 1.667587519 | protein_coding   | 2  | 238499663 | 238504624           |
| ENSG00000234956 | 0.499066092 | 0           | lincRNA          | 6  | 138051307 | 138060120           |
| ENSG00000234960 | 0.869158192 | 0.390640832 | lincRNA          | 9  | 137474325 | 137477036           |
| ENSG00000234961 | 0.499066092 | 0.390640832 | antisense        | 10 | 17275324  | 17276832            |
| ENSG00000234964 | 0.499066092 | 0.950786998 | pseudogene       | 11 | 59548550  | 59549224 FABP5P7    |
| ENSG00000234969 | 3.211941663 | 3.32456471  | pseudogene       | X  | 73289111  | 73290667            |
| ENSG00000234975 | 2.35979773  | 2.912743273 | pseudogene       | 1  | 228823162 | 228823574 FTH1P2    |
| ENSG00000234978 | 4.712111592 | 4.250702764 | processed_transc | 1  | 142803224 | 142816004           |
| ENSG00000234981 | 0.869158192 | 0.950786998 | pseudogene       | 1  | 206702248 | 206703039           |
| ENSG00000234982 | 1.407729925 | 1.16600992  | pseudogene       | 9  | 14204247  | 14205038            |
| ENSG00000234985 | 0.499066092 | 0           | pseudogene       | 7  | 121080888 | 121081315           |
| ENSG00000234995 | 0.499066092 | 0.697730409 | pseudogene       | 7  | 138175326 | 138176106           |
| ENSG00000234996 | 1.16343121  | 1.353254395 | processed_transc | 1  | 202830882 | 202844369           |
| ENSG00000234997 | 1.960915222 | 2.501982735 | antisense        | 2  | 114182072 | 114182901           |
| ENSG00000234998 | 2.671945279 | 2.788380093 | antisense        | 1  | 120906609 | 120935761           |
| ENSG00000234999 | 0           | 1.16600992  | pseudogene       | 7  | 24945754  | 24946213            |
| ENSG00000235001 | 2.238690726 | 2.579085888 | pseudogene       | Y  | 5205786   | 5207005 EIF4A1P2    |
| ENSG00000235005 | 0.869158192 | 0.390640832 | antisense        | 1  | 110426798 | 110428886           |
| ENSG00000235007 | 0           | 0.390640832 | lincRNA          | 9  | 132020633 | 132022125           |
| ENSG00000235008 | 0           | 0.697730409 | pseudogene       | 6  | 167114582 | 167116327           |
| ENSG00000235010 | 1.16343121  | 2.334191469 | antisense        | 10 | 133994729 | 133999466           |
| ENSG00000235012 | 0           | 0.390640832 | pseudogene       | 21 | 40897510  | 40901782            |
| ENSG00000235013 | 0           | 0.390640832 | pseudogene       | 2  | 231822308 | 231822665           |
| ENSG00000235016 | 4.437288965 | 4.17820932  | antisense        | 3  | 50153455  | 50193518            |
| ENSG00000235018 | 1.16343121  | 0.697730409 | pseudogene       | 20 | 60612485  | 60613012            |
| ENSG00000235021 | 0           | 0.390640832 | lincRNA          | 1  | 246853349 | 246855123           |
| ENSG00000235024 | 0.869158192 | 0.950786998 | processed_transc | 2  | 219809351 | 219826625           |
| ENSG00000235027 | 4.923348194 | 4.406904905 | antisense        | 11 | 1781578   | 1783716             |
| ENSG00000235029 | 1.407729925 | 1.16600992  | antisense        | 7  | 156799001 | 156799826           |
| ENSG00000235034 | 3.274897671 | 4.226940739 | protein_coding   | 19 | 51152702  | 51162567 C19orf81   |
| ENSG00000235036 | 2.10647801  | 1.16600992  | pseudogene       | 20 | 10593509  | 10594877            |
| ENSG00000235041 | 0.499066092 | 0.950786998 | pseudogene       | 9  | 99673317  | 99674177            |
| ENSG00000235043 | 2.10647801  | 2.652276565 | pseudogene       | 4  | 87870818  | 87871276            |
| ENSG00000235044 | 1.16343121  | 1.353254395 | pseudogene       | 20 | 36158441  | 36158945 PPIAP3     |
| ENSG00000235045 | 0.499066092 | 0           | pseudogene       | 1  | 110193992 | 110194715           |
| ENSG00000235052 | 0.499066092 | 1.925536307 | lincRNA          | 1  | 23875630  | 23877406            |
| ENSG00000235060 | 0           | 0.390640832 | pseudogene       | 1  | 180403935 | 180405071 VDAC1P4   |
| ENSG00000235064 | 0.499066092 | 0.390640832 | pseudogene       | 2  | 34064849  | 34065745            |
| ENSG00000235065 | 4.165528823 | 4.547834947 | pseudogene       | 20 | 21095364  | 21095838 RPL24P2    |
| ENSG00000235072 | 0.869158192 | 0           | processed_transc | 2  | 25592042  | 25598714            |
| ENSG00000235076 | 0.869158192 | 1.925536307 | pseudogene       | 13 | 21932512  | 21933453 GAPDHP52   |
| ENSG00000235078 | 2.10647801  | 1.518964905 | antisense        | 2  | 3523046   | 3526968             |
| ENSG00000235079 | 0           | 0.950786998 | antisense        | 1  | 71514538  | 71532867 ZRANB2-AS1 |
| ENSG00000235081 | 1.407729925 | 1.925536307 | pseudogene       | 19 | 54732911  | 54734088            |
| ENSG00000235082 | 0.869158192 | 1.518964905 | pseudogene       | 1  | 160287191 | 160287496           |
| ENSG00000235084 | 2.35979773  | 1.518964905 | pseudogene       | 1  | 15931077  | 15931538 CHCHD2P6   |
| ENSG00000235085 | 1.407729925 | 2.039052734 | antisense        | 17 | 4578674   | 4600129             |
| ENSG00000235088 | 0           | 0.390640832 | pseudogene       | 20 | 40087994  | 40090584            |
| ENSG00000235089 | 0.499066092 | 0           | pseudogene       | 1  | 81674253  | 81674895            |
| ENSG00000235090 | 0.869158192 | 0           | pseudogene       | 7  | 75552073  | 75552761 RPL7L1P3   |
| ENSG00000235091 | 0.869158192 | 0.697730409 | lincRNA          | 22 | 46271879  | 46283628            |
| ENSG00000235092 | 0.499066092 | 0.697730409 | antisense        | 2  | 8806766   | 8821993             |
| ENSG00000235096 | 0           | 0.697730409 | antisense        | 1  | 246196853 | 246198905           |
| ENSG00000235098 | 5.090170488 | 2.721932731 | protein_coding   | 1  | 1353800   | 1357149 ANKRD65     |

|                 |             |             |                  |    |           |                     |
|-----------------|-------------|-------------|------------------|----|-----------|---------------------|
| ENSG00000235100 | 1.407729925 | 2.420525079 | antisense        | 10 | 91426944  | 91461177            |
| ENSG00000235105 | 1.16343121  | 1.802319292 | pseudogene       | 1  | 48901639  | 48902895            |
| ENSG00000235106 | 8.267164507 | 8.022604578 | antisense        | 9  | 136890561 | 136894637 LINC00094 |
| ENSG00000235109 | 5.498982484 | 5.466810074 | protein_coding   | 6  | 28292470  | 28324048 ZNF323     |
| ENSG00000235112 | 0           | 0.697730409 | pseudogene       | 1  | 21487968  | 21488574            |
| ENSG00000235117 | 1.960915222 | 2.039052734 | antisense        | 9  | 139931492 | 139932407           |
| ENSG00000235119 | 0.869158192 | 0.697730409 | lincRNA          | 9  | 117159004 | 117160783           |
| ENSG00000235121 | 1.16343121  | 1.667587519 | antisense        | 1  | 201692422 | 201706634           |
| ENSG00000235124 | 0           | 0.390640832 | pseudogene       | X  | 58011120  | 58012567 KRT8P17    |
| ENSG00000235126 | 0           | 0.390640832 | lincRNA          | 3  | 197171932 | 197185194           |
| ENSG00000235129 | 0.499066092 | 0           | pseudogene       | 2  | 96034255  | 96034633 FABP7P2    |
| ENSG00000235131 | 0           | 0.390640832 | antisense        | 1  | 3628764   | 3630862             |
| ENSG00000235137 | 0.499066092 | 0           | pseudogene       | 13 | 97536096  | 97542067 HSP90AB6P  |
| ENSG00000235138 | 2.238690726 | 3.081239798 | antisense        | 9  | 136919412 | 136923927           |
| ENSG00000235145 | 0           | 0.697730409 | pseudogene       | 1  | 179937821 | 179938636           |
| ENSG00000235151 | 1.16343121  | 0.697730409 | antisense        | 2  | 242786532 | 242787188           |
| ENSG00000235159 | 1.616589159 | 1.353254395 | antisense        | 22 | 46463236  | 46465771            |
| ENSG00000235162 | 6.386460534 | 7.329495501 | protein_coding   | 12 | 105629068 | 105789875 C12orf75  |
| ENSG00000235167 | 3.911897206 | 3.183544561 | processed_transc | 20 | 36120874  | 36137633            |
| ENSG00000235169 | 1.407729925 | 0.950786998 | protein_coding   | 1  | 3689352   | 3692546             |
| ENSG00000235172 | 0.869158192 | 0.950786998 | lincRNA          | 5  | 169758433 | 169760883           |
| ENSG00000235173 | 3.448790144 | 2.788380093 | protein_coding   | 8  | 145192672 | 145195746 FAM203A   |
| ENSG00000235174 | 2.35979773  | 2.501982735 | pseudogene       | 6  | 74082831  | 74082986            |
| ENSG00000235175 | 0.499066092 | 0.697730409 | pseudogene       | Y  | 5661341   | 5661778 RPL26P37    |
| ENSG00000235180 | 3.211941663 | 4.075511708 | lincRNA          | 10 | 128102438 | 128110448           |
| ENSG00000235183 | 0           | 0.390640832 | pseudogene       | 17 | 47872705  | 47873031            |
| ENSG00000235185 | 0.499066092 | 0           | antisense        | 1  | 19918296  | 19923326            |
| ENSG00000235191 | 0.499066092 | 0.697730409 | antisense        | 19 | 49414187  | 49422148 NUCB1-AS1  |
| ENSG00000235192 | 0           | 0.390640832 | lincRNA          | 2  | 166651361 | 166666520           |
| ENSG00000235194 | 5.538004898 | 6.403479675 | protein_coding   | 14 | 23765112  | 23772057 PPP1R3E    |
| ENSG00000235196 | 0           | 0.390640832 | pseudogene       | X  | 101166533 | 101167441           |
| ENSG00000235204 | 1.616589159 | 2.039052734 | antisense        | 9  | 127021529 | 127023435           |
| ENSG00000235207 | 0           | 0.950786998 | pseudogene       | 7  | 55713313  | 55714644            |
| ENSG00000235209 | 0           | 0.390640832 | lincRNA          | 22 | 39317232  | 39320713            |
| ENSG00000235213 | 0.499066092 | 0           | pseudogene       | 14 | 23171352  | 23172274 OR6E1P     |
| ENSG00000235214 | 0.499066092 | 1.667587519 | antisense        | 20 | 33873054  | 33873559 FAM83C-AS1 |
| ENSG00000235217 | 2.57521082  | 2.721932731 | pseudogene       | 20 | 30774280  | 30778330 TSPY26P    |
| ENSG00000235225 | 1.960915222 | 2.579085888 | pseudogene       | 2  | 223591176 | 223591553           |
| ENSG00000235229 | 0.499066092 | 0.390640832 | sense_intronic   | 10 | 24604218  | 24621071            |
| ENSG00000235236 | 1.407729925 | 1.16600992  | antisense        | 3  | 49017351  | 49021418            |
| ENSG00000235237 | 2.762599152 | 3.32456471  | antisense        | 22 | 37562797  | 37578890            |
| ENSG00000235238 | 0           | 0.697730409 | pseudogene       | 6  | 29603837  | 29604120 SUMO2P1    |
| ENSG00000235241 | 1.16343121  | 1.353254395 | pseudogene       | 1  | 17215590  | 17216097            |
| ENSG00000235244 | 2.10647801  | 2.912743273 | processed_transc | X  | 115032519 | 115085422           |
| ENSG00000235245 | 3.448790144 | 4.810179682 | antisense        | 10 | 135108691 | 135109481           |
| ENSG00000235246 | 1.407729925 | 0.390640832 | processed_transc | 22 | 38627326  | 38628254            |
| ENSG00000235253 | 2.10647801  | 2.334191469 | pseudogene       | 5  | 132278624 | 132280742           |
| ENSG00000235257 | 3.077135474 | 3.845183986 | processed_transc | 3  | 37795180  | 37903271            |
| ENSG00000235258 | 0           | 0.390640832 | pseudogene       | 2  | 113043634 | 113043999           |
| ENSG00000235262 | 0           | 1.925536307 | sense_intronic   | X  | 53241590  | 53243861 KDM5C-IT1  |
| ENSG00000235264 | 1.16343121  | 1.16600992  | pseudogene       | 10 | 134958116 | 134958808           |
| ENSG00000235266 | 0           | 0.697730409 | pseudogene       | 10 | 104647631 | 104647945           |
| ENSG00000235267 | 0.499066092 | 0.390640832 | pseudogene       | 2  | 27678023  | 27678729            |
| ENSG00000235269 | 0.499066092 | 0           | lincRNA          | 14 | 54235660  | 54317600            |
| ENSG00000235270 | 1.960915222 | 2.420525079 | pseudogene       | X  | 150192078 | 150192203           |
| ENSG00000235271 | 0.499066092 | 1.353254395 | lincRNA          | 22 | 27299255  | 27316574            |
| ENSG00000235272 | 0           | 0.390640832 | pseudogene       | 6  | 166999612 | 166999965 FAM103A2P |
| ENSG00000235275 | 0.869158192 | 1.353254395 | pseudogene       | 5  | 122971804 | 122973097 KRT18P16  |
| ENSG00000235277 | 1.616589159 | 0.950786998 | antisense        | 21 | 16290855  | 16319417            |
| ENSG00000235278 | 0           | 0.390640832 | pseudogene       | 3  | 50824105  | 50825716 ZNF652P1   |
| ENSG00000235280 | 0.499066092 | 0           | antisense        | 13 | 113621823 | 113623138 MCF2L-AS1 |
| ENSG00000235282 | 0           | 0.390640832 | pseudogene       | 1  | 18839612  | 18839881            |
| ENSG00000235286 | 0.869158192 | 2.420525079 | pseudogene       | 11 | 111541680 | 111543128           |

|                 |             |             |                  |    |           |           |           |
|-----------------|-------------|-------------|------------------|----|-----------|-----------|-----------|
| ENSG00000235290 | 1.407729925 | 1.667587519 | pseudogene       | 6  | 29924373  | 29926347  | HLA-W     |
| ENSG00000235295 | 0           | 0.697730409 | lincRNA          | 22 | 18512151  | 18520734  |           |
| ENSG00000235296 | 0.499066092 | 0           | antisense        | 17 | 79899745  | 79905477  |           |
| ENSG00000235297 | 2.762599152 | 2.788380093 | pseudogene       | 18 | 72057119  | 72057532  |           |
| ENSG00000235298 | 0.869158192 | 1.518964905 | antisense        | 9  | 86587148  | 86590692  |           |
| ENSG00000235299 | 0           | 0.390640832 | pseudogene       | 1  | 113168552 | 113168847 | MRPL53P1  |
| ENSG00000235301 | 0.499066092 | 0.390640832 | pseudogene       | 6  | 32864193  | 32864267  | HLA-Z     |
| ENSG00000235308 | 0.869158192 | 0           | pseudogene       | 1  | 89389053  | 89389527  |           |
| ENSG00000235311 | 0           | 0.950786998 | lincRNA          | 9  | 97247982  | 97250077  |           |
| ENSG00000235313 | 3.004694206 | 3.027231696 | sense_intronic   | 20 | 30150969  | 30151879  | HM13-IT1  |
| ENSG00000235314 | 5.331395195 | 5.212303549 | processed_transc | 7  | 44078770  | 44081905  |           |
| ENSG00000235315 | 0.499066092 | 0.390640832 | pseudogene       | 13 | 25780187  | 25780640  | RPL23AP69 |
| ENSG00000235316 | 4.381167248 | 4.127774132 | pseudogene       | 10 | 75491582  | 75493396  |           |
| ENSG00000235318 | 0           | 0.390640832 | pseudogene       | 2  | 202079376 | 202079673 |           |
| ENSG00000235319 | 0.499066092 | 1.16600992  | lincRNA          | 2  | 105940667 | 105946986 |           |
| ENSG00000235325 | 1.16343121  | 0.697730409 | pseudogene       | 2  | 108537219 | 108537704 |           |
| ENSG00000235326 | 0.869158192 | 0.697730409 | lincRNA          | 9  | 3674546   | 3691814   |           |
| ENSG00000235328 | 0           | 0.390640832 | pseudogene       | 22 | 17574502  | 17574829  |           |
| ENSG00000235330 | 0           | 0.390640832 | pseudogene       | 9  | 477856    | 478349    |           |
| ENSG00000235331 | 2.10647801  | 2.144285137 | pseudogene       | 9  | 141130159 | 141130441 |           |
| ENSG00000235332 | 0           | 0.390640832 | pseudogene       | 9  | 127956928 | 127958101 |           |
| ENSG00000235337 | 0.499066092 | 0           | lincRNA          | 2  | 220992267 | 221077212 |           |
| ENSG00000235347 | 0.869158192 | 0.697730409 | pseudogene       | 22 | 46188298  | 46189516  |           |
| ENSG00000235349 | 0.869158192 | 0.950786998 | pseudogene       | 7  | 64027192  | 64027821  |           |
| ENSG00000235351 | 1.16343121  | 2.144285137 | antisense        | 2  | 242664030 | 242665108 |           |
| ENSG00000235354 | 0.499066092 | 0.697730409 | pseudogene       | 7  | 102989048 | 102989218 |           |
| ENSG00000235358 | 1.407729925 | 0.950786998 | lincRNA          | 1  | 41708045  | 41750533  |           |
| ENSG00000235359 | 1.407729925 | 0.950786998 | antisense        | 1  | 32786799  | 32788162  |           |
| ENSG00000235363 | 0           | 0.390640832 | pseudogene       | 1  | 205320375 | 205320599 | SNRPGP10  |
| ENSG00000235369 | 0.869158192 | 0.697730409 | pseudogene       | 2  | 48024965  | 48025230  | RPL36AP15 |
| ENSG00000235370 | 2.928422289 | 2.579085888 | processed_transc | 15 | 84953014  | 84966399  | CSPG4P5   |
| ENSG00000235371 | 1.16343121  | 0           | pseudogene       | 1  | 236273361 | 236275670 |           |
| ENSG00000235373 | 4.593635215 | 3.906303962 | lincRNA          | 1  | 677193    | 685396    |           |
| ENSG00000235374 | 1.799000381 | 2.971122874 | pseudogene       | 21 | 46491648  | 46494080  | SSR4P1    |
| ENSG00000235375 | 0           | 0.390640832 | pseudogene       | 9  | 45783410  | 45783620  |           |
| ENSG00000235376 | 0.499066092 | 1.16600992  | pseudogene       | 10 | 105005644 | 105007773 |           |
| ENSG00000235377 | 0           | 0.390640832 | pseudogene       | 9  | 84745667  | 84746547  |           |
| ENSG00000235381 | 4.734682531 | 4.528525526 | antisense        | 6  | 155574273 | 155577858 |           |
| ENSG00000235385 | 4.618121645 | 5.96747225  | lincRNA          | X  | 13284167  | 13321571  |           |
| ENSG00000235387 | 0.869158192 | 0.390640832 | processed_transc | 9  | 35909480  | 35911683  |           |
| ENSG00000235397 | 0.499066092 | 0.950786998 | antisense        | 17 | 19199909  | 19209574  | EPN2-AS1  |
| ENSG00000235398 | 0           | 0.697730409 | processed_transc | 1  | 144275918 | 144341756 |           |
| ENSG00000235400 | 4.903563137 | 5.212303549 | pseudogene       | 1  | 79214758  | 79216344  |           |
| ENSG00000235408 | 0           | 0.390640832 | non_coding       | 20 | 37053843  | 37053978  |           |
| ENSG00000235410 | 0           | 0.390640832 | antisense        | 10 | 14116283  | 14129604  |           |
| ENSG00000235411 | 1.960915222 | 0.697730409 | pseudogene       | 2  | 20439653  | 20440807  |           |
| ENSG00000235413 | 0.499066092 | 0.950786998 | pseudogene       | 4  | 17913297  | 17914599  |           |
| ENSG00000235419 | 0.869158192 | 0.390640832 | processed_transc | 2  | 231385309 | 231444721 |           |
| ENSG00000235420 | 0           | 0.950786998 | pseudogene       | 15 | 71088936  | 71095027  | RPL29P30  |
| ENSG00000235422 | 0.499066092 | 0           | pseudogene       | 18 | 2593673   | 2594912   |           |
| ENSG00000235423 | 3.004694206 | 3.183544561 | 3prime_overlapp  | 12 | 123728734 | 123746030 |           |
| ENSG00000235426 | 0.869158192 | 0           | antisense        | 10 | 81142084  | 81169030  |           |
| ENSG00000235427 | 1.616589159 | 0.390640832 | antisense        | 7  | 116182772 | 116192023 |           |
| ENSG00000235429 | 0           | 0.697730409 | pseudogene       | 7  | 132999763 | 133000167 |           |
| ENSG00000235436 | 4.842525946 | 4.202780776 | pseudogene       | 7  | 89748714  | 89754914  | DPY19L2P4 |
| ENSG00000235437 | 5.752272083 | 6.084484284 | processed_transc | X  | 62729822  | 62780929  |           |
| ENSG00000235438 | 0           | 0.390640832 | pseudogene       | 13 | 21834171  | 21835719  | ESRRAP2   |
| ENSG00000235440 | 0.869158192 | 0.697730409 | pseudogene       | 2  | 26324186  | 26325005  |           |
| ENSG00000235445 | 0           | 0.390640832 | sense_intronic   | 22 | 18465971  | 18466385  |           |
| ENSG00000235448 | 0.869158192 | 2.334191469 | processed_transc | 9  | 12700100  | 12814344  |           |
| ENSG00000235449 | 1.16343121  | 1.16600992  | pseudogene       | 1  | 202736357 | 202736548 |           |
| ENSG00000235453 | 3.146112541 | 3.748356452 | processed_transc | 9  | 32551142  | 32567003  | C9orf133  |
| ENSG00000235454 | 1.799000381 | 1.667587519 | pseudogene       | 7  | 53929926  | 53931032  |           |

|                 |             |             |                  |    |           |           |            |
|-----------------|-------------|-------------|------------------|----|-----------|-----------|------------|
| ENSG00000235459 | 0.499066092 | 0.697730409 | pseudogene       | 7  | 122321344 | 122321757 | RPS26P31   |
| ENSG00000235470 | 0           | 0.390640832 | antisense        | 10 | 105239360 | 105277150 |            |
| ENSG00000235471 | 3.448790144 | 2.579085888 | protein_coding   | 1  | 168048781 | 168054469 |            |
| ENSG00000235472 | 1.616589159 | 1.518964905 | pseudogene       | 13 | 29172970  | 29174189  | EIF4A1P7   |
| ENSG00000235475 | 2.35979773  | 1.518964905 | lincRNA          | 7  | 66800963  | 66805011  |            |
| ENSG00000235477 | 5.649112675 | 5.784235782 | antisense        | 1  | 161337812 | 161341754 |            |
| ENSG00000235478 | 0.499066092 | 1.16600992  | protein_coding   | 22 | 17602476  | 17612994  |            |
| ENSG00000235481 | 0           | 0.390640832 | antisense        | 9  | 33785948  | 33799911  |            |
| ENSG00000235483 | 0           | 0.390640832 | antisense        | X  | 2770781   | 2771801   | GYG2-AS1   |
| ENSG00000235488 | 1.960915222 | 2.039052734 | antisense        | 6  | 15248046  | 15248865  | JARID2-AS1 |
| ENSG00000235489 | 2.471521042 | 1.16600992  | pseudogene       | 10 | 65928715  | 65930611  |            |
| ENSG00000235494 | 0           | 0.390640832 | lincRNA          | 9  | 99995483  | 99997296  |            |
| ENSG00000235499 | 2.238690726 | 2.334191469 | lincRNA          | 2  | 74212259  | 74213470  |            |
| ENSG00000235500 | 1.407729925 | 2.420525079 | pseudogene       | 13 | 19466400  | 19469370  | SNX19P2    |
| ENSG00000235501 | 3.211941663 | 3.279072565 | antisense        | 1  | 95393122  | 95428826  |            |
| ENSG00000235505 | 0           | 1.667587519 | pseudogene       | 11 | 104772276 | 104789800 |            |
| ENSG00000235508 | 3.335220907 | 3.570966319 | pseudogene       | 20 | 44269125  | 44270009  | RPS2P7     |
| ENSG00000235513 | 3.146112541 | 2.788380093 | antisense        | 22 | 41605126  | 41613631  |            |
| ENSG00000235527 | 0.869158192 | 1.518964905 | processed_transc | 1  | 114466622 | 114472114 |            |
| ENSG00000235529 | 2.471521042 | 2.721932731 | sense_intronic   | 2  | 236414395 | 236416210 | AGAP1-IT1  |
| ENSG00000235530 | 1.407729925 | 2.242360793 | antisense        | 17 | 21117671  | 21133348  |            |
| ENSG00000235531 | 4.712111592 | 5.564846512 | protein_coding   | 8  | 72740402  | 73030628  |            |
| ENSG00000235532 | 0           | 0.390640832 | processed_transc | 13 | 74805594  | 74834113  | LINC00402  |
| ENSG00000235545 | 1.616589159 | 1.802319292 | antisense        | 1  | 63154153  | 63176365  |            |
| ENSG00000235552 | 2.10647801  | 2.652276565 | pseudogene       | 18 | 6462143   | 6463009   |            |
| ENSG00000235554 | 0           | 0.950786998 | pseudogene       | 17 | 16520162  | 16521195  |            |
| ENSG00000235559 | 0           | 0.390640832 | pseudogene       | 6  | 28751410  | 28751781  |            |
| ENSG00000235560 | 3.603959378 | 3.570966319 | processed_transc | 16 | 30546073  | 30548465  |            |
| ENSG00000235562 | 0           | 0.390640832 | pseudogene       | 9  | 67343677  | 67344322  |            |
| ENSG00000235565 | 0.499066092 | 1.16600992  | lincRNA          | 1  | 95086707  | 95089740  |            |
| ENSG00000235568 | 6.809636522 | 7.067139131 | protein_coding   | 22 | 42776416  | 42828401  | NFAM1      |
| ENSG00000235574 | 0           | 0.390640832 | pseudogene       | 7  | 27531301  | 27532384  |            |
| ENSG00000235579 | 0.499066092 | 0.697730409 | pseudogene       | 2  | 202027207 | 202027403 |            |
| ENSG00000235582 | 0.499066092 | 0           | pseudogene       | 1  | 197704766 | 197705239 |            |
| ENSG00000235584 | 0.499066092 | 0.697730409 | lincRNA          | 2  | 96331832  | 96334010  |            |
| ENSG00000235586 | 0.499066092 | 0.390640832 | antisense        | 2  | 38828740  | 38829320  |            |
| ENSG00000235587 | 3.335220907 | 2.501982735 | pseudogene       | X  | 46299144  | 46300149  | GAPDHP65   |
| ENSG00000235590 | 0           | 0.390640832 | antisense        | 20 | 57393974  | 57425958  | GNAS-AS1   |
| ENSG00000235594 | 0.499066092 | 0           | pseudogene       | 20 | 54842928  | 54844287  |            |
| ENSG00000235602 | 0.499066092 | 0.950786998 | pseudogene       | 12 | 8286372   | 8287447   | POU5F1P3   |
| ENSG00000235605 | 1.799000381 | 1.667587519 | pseudogene       | 1  | 234492450 | 234492887 |            |
| ENSG00000235609 | 3.004694206 | 2.334191469 | processed_transc | 21 | 16195290  | 16254296  |            |
| ENSG00000235613 | 0.499066092 | 0.390640832 | pseudogene       | 1  | 78312793  | 78314487  | NSRP1P1    |
| ENSG00000235617 | 2.10647801  | 2.242360793 | pseudogene       | 22 | 18584378  | 18584654  |            |
| ENSG00000235618 | 2.847891871 | 2.721932731 | processed_transc | 10 | 51780942  | 51827563  |            |
| ENSG00000235619 | 0.869158192 | 0           | pseudogene       | 9  | 35507561  | 35507870  |            |
| ENSG00000235621 | 3.211941663 | 2.144285137 | processed_transc | 20 | 46983957  | 46999372  | LINC00494  |
| ENSG00000235623 | 0.499066092 | 0           | pseudogene       | 10 | 15028873  | 15031447  |            |
| ENSG00000235627 | 0           | 0.697730409 | pseudogene       | 3  | 48202666  | 48202907  | SNRFPF4    |
| ENSG00000235631 | 1.16343121  | 0.697730409 | protein_coding   | 7  | 122341718 | 122343021 | RNF148     |
| ENSG00000235635 | 0.499066092 | 0.390640832 | antisense        | 5  | 56237134  | 56242979  |            |
| ENSG00000235636 | 0           | 0.950786998 | pseudogene       | X  | 47372001  | 47372882  | NUS1P1     |
| ENSG00000235641 | 1.407729925 | 0.390640832 | lincRNA          | 9  | 93922051  | 93927858  | LINC00484  |
| ENSG00000235643 | 0.499066092 | 0.697730409 | lincRNA          | 1  | 11669588  | 11673412  |            |
| ENSG00000235651 | 0.499066092 | 0.697730409 | pseudogene       | 2  | 136268116 | 136269513 |            |
| ENSG00000235652 | 1.960915222 | 1.16600992  | processed_transc | 6  | 146136377 | 146204575 |            |
| ENSG00000235655 | 4.77879189  | 5.125003832 | pseudogene       | 2  | 175584505 | 175585526 | H3F3AP4    |
| ENSG00000235659 | 0.869158192 | 0           | lincRNA          | 9  | 45001907  | 45003117  |            |
| ENSG00000235663 | 0           | 0.390640832 | antisense        | 6  | 31732087  | 31733365  | SAPCD1-AS1 |
| ENSG00000235664 | 0.869158192 | 1.353254395 | lincRNA          | 7  | 22928990  | 22980809  |            |
| ENSG00000235667 | 3.603959378 | 2.242360793 | lincRNA          | 2  | 220594832 | 220602464 |            |
| ENSG00000235672 | 0.499066092 | 1.353254395 | pseudogene       | 17 | 18811592  | 18812178  |            |
| ENSG00000235674 | 1.407729925 | 0.950786998 | pseudogene       | 1  | 235901305 | 235902289 | LDHAP2     |

|                 |             |             |                  |    |           |                       |
|-----------------|-------------|-------------|------------------|----|-----------|-----------------------|
| ENSG00000235677 | 1.616589159 | 2.652276565 | pseudogene       | 10 | 98319942  | 98320679              |
| ENSG00000235681 | 1.799000381 | 2.788380093 | pseudogene       | 19 | 54958008  | 54958225              |
| ENSG00000235686 | 1.799000381 | 0.950786998 | pseudogene       | 19 | 12618943  | 12619077 PPIAP20      |
| ENSG00000235695 | 0           | 0.697730409 | pseudogene       | 3  | 47705116  | 47705424              |
| ENSG00000235698 | 1.16343121  | 1.353254395 | pseudogene       | 20 | 12360704  | 12361903 PA2G4P2      |
| ENSG00000235700 | 0           | 0.697730409 | pseudogene       | 1  | 157098154 | 157098463 CYCSP52     |
| ENSG00000235701 | 1.16343121  | 1.802319292 | pseudogene       | 21 | 40543056  | 40544032 PCBP2P1      |
| ENSG00000235703 | 5.40360309  | 5.9163892   | processed_transc | X  | 149106846 | 149392815             |
| ENSG00000235704 | 0.499066092 | 0           | lincRNA          | 22 | 20377669  | 20378803              |
| ENSG00000235706 | 5.695874189 | 5.41517489  | processed_transc | 14 | 95623982  | 95646263 DICER1-AS    |
| ENSG00000235720 | 0.499066092 | 0           | pseudogene       | 7  | 63353664  | 63355019              |
| ENSG00000235721 | 1.616589159 | 1.518964905 | pseudogene       | 2  | 110765252 | 110768360             |
| ENSG00000235724 | 0.869158192 | 2.039052734 | antisense        | 2  | 162079296 | 162111154             |
| ENSG00000235725 | 0           | 0.390640832 | lincRNA          | 2  | 65816700  | 65867311              |
| ENSG00000235726 | 0.869158192 | 1.16600992  | processed_transc | 2  | 235742959 | 235822028             |
| ENSG00000235730 | 0.499066092 | 0           | pseudogene       | X  | 130753023 | 130753911             |
| ENSG00000235740 | 0           | 0.390640832 | antisense        | 6  | 143875462 | 143883168             |
| ENSG00000235746 | 0.499066092 | 0.950786998 | pseudogene       | 10 | 96406121  | 96407753              |
| ENSG00000235748 | 1.407729925 | 1.16600992  | pseudogene       | 1  | 197107878 | 197108437             |
| ENSG00000235750 | 3.950976309 | 1.16600992  | lincRNA          | 1  | 175126123 | 175162224 KIAA0040    |
| ENSG00000235760 | 1.16343121  | 2.144285137 | antisense        | 2  | 47754676  | 47762338              |
| ENSG00000235763 | 0.499066092 | 0.390640832 | pseudogene       | 10 | 13146574  | 13146793 SNRPGP5      |
| ENSG00000235768 | 0           | 0.390640832 | pseudogene       | 13 | 95409705  | 95411526 BRD7P5       |
| ENSG00000235770 | 0.869158192 | 1.802319292 | processed_transc | 2  | 216476286 | 216708445             |
| ENSG00000235772 | 0.499066092 | 0.390640832 | antisense        | 21 | 43980484  | 43982044              |
| ENSG00000235776 | 1.960915222 | 2.579085888 | pseudogene       | 22 | 19779817  | 19780614              |
| ENSG00000235777 | 0.499066092 | 0.697730409 | antisense        | 1  | 98262477  | 98263622 DPYD-AS2     |
| ENSG00000235781 | 0.869158192 | 1.667587519 | antisense        | 6  | 30484043  | 30486994              |
| ENSG00000235782 | 0           | 0.390640832 | antisense        | 1  | 71413062  | 71417176              |
| ENSG00000235784 | 0.499066092 | 1.16600992  | pseudogene       | 13 | 94047181  | 94048108 HNRNPA1P29   |
| ENSG00000235786 | 1.407729925 | 1.353254395 | sense_intronic   | 22 | 29388709  | 29414608 ZNRF3-IT1    |
| ENSG00000235790 | 0           | 1.518964905 | antisense        | 1  | 32121710  | 32125539              |
| ENSG00000235795 | 2.238690726 | 2.144285137 | antisense        | 1  | 101461029 | 101461816             |
| ENSG00000235802 | 0.869158192 | 1.518964905 | antisense        | X  | 153234776 | 153235538 HCFC1-AS1   |
| ENSG00000235806 | 0           | 0.390640832 | lincRNA          | X  | 38629584  | 38658911              |
| ENSG00000235808 | 0.499066092 | 0.697730409 | pseudogene       | 21 | 40860253  | 40860686 MYL6P2       |
| ENSG00000235812 | 1.616589159 | 1.353254395 | pseudogene       | 14 | 70712470  | 70714518 ADAM21P1     |
| ENSG00000235821 | 0           | 0.950786998 | pseudogene       | 6  | 29718506  | 29718925 IFITM4P      |
| ENSG00000235823 | 8.061582684 | 6.945015469 | processed_transc | 10 | 102133372 | 102143125 LINC00263   |
| ENSG00000235827 | 0.869158192 | 0           | pseudogene       | 1  | 227693883 | 227695993             |
| ENSG00000235828 | 0.499066092 | 0           | pseudogene       | 7  | 15741057  | 15741377              |
| ENSG00000235831 | 3.871730003 | 2.851901313 | processed_transc | 3  | 4938493   | 5021646               |
| ENSG00000235833 | 1.799000381 | 1.16600992  | pseudogene       | 2  | 98140412  | 98141439              |
| ENSG00000235834 | 0.499066092 | 1.16600992  | sense_intronic   | X  | 17546558  | 17605281              |
| ENSG00000235837 | 1.799000381 | 1.16600992  | antisense        | 7  | 16735496  | 16759523              |
| ENSG00000235840 | 0.499066092 | 0           | lincRNA          | 2  | 121076583 | 121083874             |
| ENSG00000235842 | 2.671945279 | 0.390640832 | processed_transc | 6  | 138144810 | 138147031             |
| ENSG00000235847 | 1.960915222 | 1.802319292 | pseudogene       | 2  | 85004383  | 85005347 LDHAP7       |
| ENSG00000235848 | 0           | 0.390640832 | antisense        | 2  | 38177477  | 38263484              |
| ENSG00000235852 | 2.238690726 | 2.144285137 | antisense        | 2  | 191745523 | 191746785             |
| ENSG00000235859 | 5.848544806 | 5.383282767 | pseudogene       | 7  | 30410987  | 30412357              |
| ENSG00000235863 | 4.409500985 | 4.17820932  | protein_coding   | 6  | 33244917  | 33246602 B3GALT4      |
| ENSG00000235865 | 2.10647801  | 2.851901313 | antisense        | 9  | 124043046 | 124047808 C9orf31     |
| ENSG00000235872 | 0           | 0.390640832 | antisense        | 12 | 68052771  | 68064699              |
| ENSG00000235874 | 1.616589159 | 1.802319292 | antisense        | 10 | 112188598 | 112255954             |
| ENSG00000235878 | 3.950976309 | 3.532712221 | protein_coding   | 21 | 47609638  | 47613673              |
| ENSG00000235884 | 6.738827102 | 6.677762549 | processed_transc | 12 | 30947977  | 30955645              |
| ENSG00000235885 | 0           | 0.390640832 | lincRNA          | 2  | 67313578  | 67523207              |
| ENSG00000235888 | 1.616589159 | 2.039052734 | lincRNA          | 21 | 40360633  | 40378079              |
| ENSG00000235890 | 4.352265886 | 5.125003832 | antisense        | 21 | 45926690  | 45935738 TSPEAR-AS1   |
| ENSG00000235897 | 3.335220907 | 2.501982735 | antisense        | 3  | 196045201 | 196052441 TM4SF19-AS1 |
| ENSG00000235904 | 0.869158192 | 2.420525079 | antisense        | 3  | 29305685  | 29332217 RBMS3-AS3    |
| ENSG00000235907 | 0           | 0.697730409 | pseudogene       | 1  | 33977608  | 33978343              |

|                 |             |             |                  |    |           |           |           |
|-----------------|-------------|-------------|------------------|----|-----------|-----------|-----------|
| ENSG00000235908 | 0.869158192 | 2.039052734 | sense_intronic   | 3  | 49402578  | 49404439  | RHOA-IT1  |
| ENSG00000235910 | 0           | 1.353254395 | antisense        | 11 | 116706833 | 116726445 |           |
| ENSG00000235912 | 0.869158192 | 1.16600992  | pseudogene       | 1  | 27975930  | 27976121  |           |
| ENSG00000235916 | 0.869158192 | 0           | pseudogene       | X  | 53852385  | 53852807  |           |
| ENSG00000235919 | 4.491309013 | 5.383282767 | processed_transc | 1  | 155531833 | 155533735 |           |
| ENSG00000235920 | 0.499066092 | 0.390640832 | pseudogene       | 7  | 11859943  | 11860920  |           |
| ENSG00000235924 | 0           | 0.390640832 | pseudogene       | 10 | 81741595  | 81741968  |           |
| ENSG00000235927 | 2.928422289 | 2.912743273 | processed_transc | 1  | 78347033  | 78355224  | NEXN-AS1  |
| ENSG00000235934 | 1.16343121  | 2.242360793 | antisense        | 2  | 171672803 | 171674547 |           |
| ENSG00000235935 | 2.471521042 | 2.652276565 | protein_coding   | 17 | 75424897  | 75427072  |           |
| ENSG00000235937 | 0.499066092 | 0.950786998 | pseudogene       | 2  | 54256689  | 54257819  |           |
| ENSG00000235939 | 0           | 0.697730409 | antisense        | 10 | 50627323  | 50680949  |           |
| ENSG00000235944 | 6.984620223 | 6.831423059 | pseudogene       | 7  | 5862791   | 5894066   | ZNF815    |
| ENSG00000235945 | 0.869158192 | 0.950786998 | pseudogene       | 7  | 116513508 | 116516430 |           |
| ENSG00000235947 | 0.869158192 | 1.518964905 | non_coding       | 3  | 4790876   | 4793274   | EGOT      |
| ENSG00000235954 | 8.039090007 | 8.843538053 | processed_transc | 22 | 28315364  | 28404569  | TTC28-AS1 |
| ENSG00000235955 | 1.16343121  | 0.390640832 | pseudogene       | 7  | 45855815  | 45858615  |           |
| ENSG00000235958 | 2.847891871 | 2.652276565 | processed_transc | 20 | 3087559   | 3131513   |           |
| ENSG00000235962 | 0.499066092 | 0.697730409 | pseudogene       | 10 | 33346543  | 33347343  |           |
| ENSG00000235963 | 0.869158192 | 0           | pseudogene       | 6  | 29875560  | 29876422  | MCCD1P1   |
| ENSG00000235964 | 0           | 0.950786998 | pseudogene       | 10 | 38380692  | 38380979  | FXD6P2    |
| ENSG00000235967 | 0           | 0.390640832 | pseudogene       | 7  | 133412121 | 133412487 | COX5BP3   |
| ENSG00000235974 | 5.158541613 | 4.841813558 | pseudogene       | 19 | 58523957  | 58537294  | VN2R19P   |
| ENSG00000235978 | 0.869158192 | 1.16600992  | protein_coding   | 3  | 4855978   | 4928977   |           |
| ENSG00000235979 | 0.869158192 | 0.950786998 | processed_transc | 17 | 19342456  | 19364048  |           |
| ENSG00000235982 | 1.616589159 | 0.390640832 | pseudogene       | 7  | 97512594  | 97513107  |           |
| ENSG00000235983 | 1.407729925 | 2.039052734 | antisense        | 9  | 33983643  | 33984662  |           |
| ENSG00000235989 | 6.610461229 | 6.084484284 | antisense        | 22 | 31318295  | 31328436  | MORC2-AS1 |
| ENSG00000235990 | 1.407729925 | 1.16600992  | pseudogene       | 1  | 242079378 | 242079846 |           |
| ENSG00000235994 | 0.869158192 | 0.390640832 | lincRNA          | 6  | 168376604 | 168379053 |           |
| ENSG00000235999 | 6.212449006 | 6.338437404 | processed_transc | 1  | 149287451 | 149291743 |           |
| ENSG00000236002 | 1.616589159 | 2.579085888 | pseudogene       | 17 | 34930301  | 34931164  |           |
| ENSG00000236003 | 1.16343121  | 1.16600992  | antisense        | 22 | 20876357  | 20878157  |           |
| ENSG00000236004 | 0           | 0.390640832 | pseudogene       | 1  | 52655587  | 52655980  |           |
| ENSG00000236008 | 0           | 0.390640832 | lincRNA          | 2  | 8699963   | 8723922   |           |
| ENSG00000236015 | 2.35979773  | 2.971122874 | pseudogene       | 7  | 39608975  | 39609797  |           |
| ENSG00000236016 | 2.10647801  | 1.518964905 | antisense        | 6  | 86340107  | 86340841  |           |
| ENSG00000236017 | 5.286269488 | 6.016808232 | antisense        | X  | 1520662   | 1534319   | ASMTL-AS1 |
| ENSG00000236018 | 1.960915222 | 1.518964905 | pseudogene       | 7  | 156990294 | 156991205 |           |
| ENSG00000236021 | 0           | 0.697730409 | antisense        | 1  | 176176784 | 176198466 |           |
| ENSG00000236027 | 0.869158192 | 0.697730409 | protein_coding   | 11 | 125658006 | 125661495 | PATE3     |
| ENSG00000236029 | 0           | 0.390640832 | protein_coding   | 9  | 47295855  | 47314322  |           |
| ENSG00000236031 | 0           | 0.697730409 | antisense        | 1  | 243708834 | 243711631 |           |
| ENSG00000236035 | 0.499066092 | 0.697730409 | pseudogene       | 1  | 203626095 | 203626888 |           |
| ENSG00000236044 | 0           | 0.390640832 | pseudogene       | 13 | 52540878  | 52541285  | FABP5P2   |
| ENSG00000236045 | 0.499066092 | 0           | antisense        | 1  | 15660662  | 15661960  |           |
| ENSG00000236047 | 0.499066092 | 0.390640832 | pseudogene       | 2  | 203385124 | 203385712 |           |
| ENSG00000236048 | 0           | 0.390640832 | pseudogene       | 7  | 12510978  | 12512171  |           |
| ENSG00000236049 | 0           | 0.950786998 | lincRNA          | 2  | 151409046 | 151428735 |           |
| ENSG00000236055 | 0.499066092 | 1.16600992  | pseudogene       | 1  | 142790583 | 142791175 |           |
| ENSG00000236058 | 0           | 1.16600992  | pseudogene       | 10 | 120631561 | 120632114 |           |
| ENSG00000236060 | 2.57521082  | 2.039052734 | pseudogene       | 9  | 74622797  | 74623052  | HSPB1P1   |
| ENSG00000236064 | 0           | 1.16600992  | processed_transc | X  | 107137827 | 107179210 |           |
| ENSG00000236065 | 1.960915222 | 1.353254395 | processed_transc | 1  | 33452676  | 33498070  |           |
| ENSG00000236066 | 1.16343121  | 1.802319292 | lincRNA          | 1  | 113550876 | 113589677 |           |
| ENSG00000236073 | 0.499066092 | 0.390640832 | pseudogene       | 1  | 21400063  | 21400246  |           |
| ENSG00000236078 | 1.960915222 | 0.697730409 | lincRNA          | 7  | 47661537  | 47669491  |           |
| ENSG00000236081 | 5.613019223 | 5.938503778 | lincRNA          | 7  | 1778266   | 1781927   |           |
| ENSG00000236083 | 1.799000381 | 1.518964905 | pseudogene       | 9  | 35859059  | 35859980  | OR13E1P   |
| ENSG00000236086 | 0.499066092 | 0           | pseudogene       | 6  | 2341684   | 2341950   | HMG2P28   |
| ENSG00000236088 | 3.78787645  | 5.150490275 | lincRNA          | 17 | 13679951  | 13695867  |           |
| ENSG00000236090 | 0.869158192 | 1.16600992  | pseudogene       | 2  | 42046887  | 42047894  | LDHAP3    |
| ENSG00000236091 | 0.869158192 | 1.667587519 | lincRNA          | X  | 134083579 | 134087412 |           |

|                 |             |             |                  |    |           |           |            |
|-----------------|-------------|-------------|------------------|----|-----------|-----------|------------|
| ENSG00000236092 | 0.499066092 | 0.390640832 | processed_transc | 13 | 19312245  | 19317477  | LINC00417  |
| ENSG00000236095 | 0           | 1.16600992  | sense_intronic   | 9  | 97662711  | 97667036  |            |
| ENSG00000236097 | 1.407729925 | 0           | pseudogene       | 22 | 16627920  | 16628496  | BNIP3P2    |
| ENSG00000236098 | 2.762599152 | 1.16600992  | lincRNA          | 1  | 94784035  | 94790125  |            |
| ENSG00000236104 | 7.210761201 | 7.423961341 | protein_coding   | 6  | 33282183  | 33285719  | ZBTB22     |
| ENSG00000236108 | 0.499066092 | 0.390640832 | pseudogene       | 1  | 205103774 | 205104078 |            |
| ENSG00000236111 | 0.499066092 | 1.667587519 | pseudogene       | 1  | 46246949  | 46247629  |            |
| ENSG00000236114 | 0           | 0.390640832 | pseudogene       | 10 | 44018704  | 44020665  |            |
| ENSG00000236115 | 0           | 0.950786998 | antisense        | 9  | 94967638  | 94972440  |            |
| ENSG00000236123 | 0           | 0.697730409 | pseudogene       | 19 | 43783085  | 43788470  | CEACAMP11  |
| ENSG00000236130 | 0.499066092 | 0.390640832 | lincRNA          | 9  | 100568217 | 100572290 |            |
| ENSG00000236132 | 1.16343121  | 0.390640832 | pseudogene       | 22 | 32212365  | 32213477  |            |
| ENSG00000236137 | 1.407729925 | 1.16600992  | antisense        | 1  | 117568104 | 117602112 |            |
| ENSG00000236138 | 1.16343121  | 1.353254395 | pseudogene       | 3  | 75718082  | 75719336  |            |
| ENSG00000236144 | 3.744048221 | 3.993387124 | antisense        | 19 | 36032862  | 36036405  |            |
| ENSG00000236152 | 0.499066092 | 0           | pseudogene       | 3  | 6814724   | 6815030   | MRPS36P1   |
| ENSG00000236156 | 1.960915222 | 0.697730409 | pseudogene       | 9  | 37434109  | 37434577  |            |
| ENSG00000236162 | 0           | 0.390640832 | lincRNA          | 2  | 10857899  | 10861078  |            |
| ENSG00000236163 | 3.211941663 | 3.232099092 | sense_intronic   | 6  | 42756998  | 42759057  |            |
| ENSG00000236165 | 1.407729925 | 2.652276565 | pseudogene       | 3  | 37017807  | 37018331  |            |
| ENSG00000236166 | 0           | 0.697730409 | lincRNA          | 6  | 132406224 | 132420419 |            |
| ENSG00000236173 | 0.499066092 | 0.950786998 | lincRNA          | 6  | 170209414 | 170210198 |            |
| ENSG00000236182 | 0           | 0.390640832 | pseudogene       | 3  | 188707171 | 188707924 |            |
| ENSG00000236184 | 2.471521042 | 1.667587519 | pseudogene       | 9  | 32979558  | 32980401  |            |
| ENSG00000236187 | 0           | 0.390640832 | pseudogene       | X  | 18553199  | 18554240  | GJA6P      |
| ENSG00000236188 | 0.499066092 | 0           | antisense        | X  | 3577528   | 3586233   | PRKX-AS1   |
| ENSG00000236189 | 0.499066092 | 0           | pseudogene       | X  | 110867404 | 110867954 | RPL18AP15  |
| ENSG00000236194 | 0           | 1.16600992  | antisense        | 17 | 40423352  | 40424701  |            |
| ENSG00000236198 | 0.499066092 | 0.390640832 | pseudogene       | 2  | 84101832  | 84103457  |            |
| ENSG00000236199 | 0.499066092 | 0           | antisense        | 9  | 2041900   | 2046023   |            |
| ENSG00000236200 | 3.652182994 | 3.368666104 | antisense        | 1  | 44165436  | 44173809  |            |
| ENSG00000236204 | 2.35979773  | 2.501982735 | lincRNA          | 2  | 19167729  | 19546509  |            |
| ENSG00000236209 | 0.499066092 | 0.390640832 | lincRNA          | 2  | 75146682  | 75151973  |            |
| ENSG00000236212 | 2.238690726 | 1.667587519 | lincRNA          | 7  | 34249138  | 34295955  |            |
| ENSG00000236213 | 0           | 0.390640832 | antisense        | 2  | 37827279  | 37873841  |            |
| ENSG00000236215 | 1.16343121  | 0.390640832 | pseudogene       | 9  | 66454941  | 66456495  |            |
| ENSG00000236220 | 0           | 0.697730409 | pseudogene       | 17 | 18609924  | 18610199  |            |
| ENSG00000236226 | 0.869158192 | 0.950786998 | antisense        | 7  | 102670551 | 102671801 |            |
| ENSG00000236229 | 0           | 0.390640832 | pseudogene       | 3  | 192873245 | 192874997 | VEZF1P1    |
| ENSG00000236231 | 0           | 0.390640832 | lincRNA          | 2  | 177389607 | 177396411 |            |
| ENSG00000236233 | 3.652182994 | 3.679994897 | pseudogene       | 9  | 67792167  | 67794649  |            |
| ENSG00000236234 | 1.16343121  | 1.925536307 | antisense        | 17 | 43530210  | 43541431  |            |
| ENSG00000236238 | 0.499066092 | 0.390640832 | pseudogene       | 7  | 131350266 | 131350617 |            |
| ENSG00000236239 | 2.471521042 | 0.950786998 | lincRNA          | 1  | 1363502   | 1365635   |            |
| ENSG00000236242 | 0.499066092 | 0           | antisense        | 13 | 109816250 | 109853831 | MYO16-AS1  |
| ENSG00000236243 | 0.499066092 | 0           | pseudogene       | X  | 97506677  | 97507535  | RPL6P29    |
| ENSG00000236255 | 5.986594255 | 5.808454063 | lincRNA          | 2  | 118591513 | 118599234 |            |
| ENSG00000236256 | 1.16343121  | 0.697730409 | antisense        | X  | 96686257  | 96897588  | DIAPH2-AS1 |
| ENSG00000236257 | 5.316509574 | 5.317302248 | pseudogene       | 1  | 158423988 | 158425063 |            |
| ENSG00000236259 | 0           | 0.390640832 | pseudogene       | 2  | 68352397  | 68352879  |            |
| ENSG00000236264 | 0.499066092 | 0.950786998 | pseudogene       | 11 | 2356365   | 2357001   | RPL26P30   |
| ENSG00000236266 | 1.16343121  | 0.950786998 | antisense        | 1  | 7870302   | 7887402   |            |
| ENSG00000236269 | 2.762599152 | 3.232099092 | sense_intronic   | 1  | 8935847   | 8938066   | ENO1-IT1   |
| ENSG00000236272 | 0           | 0.390640832 | antisense        | 22 | 43608680  | 43609667  |            |
| ENSG00000236281 | 0.869158192 | 0.950786998 | pseudogene       | 7  | 131438505 | 131439011 |            |
| ENSG00000236287 | 8.479173607 | 8.566610935 | protein_coding   | 11 | 10833621  | 10880343  | ZBED5      |
| ENSG00000236295 | 0.499066092 | 0           | antisense        | 2  | 217735164 | 217738655 |            |
| ENSG00000236305 | 1.16343121  | 0.697730409 | antisense        | 7  | 100434936 | 100450238 |            |
| ENSG00000236307 | 1.616589159 | 1.353254395 | pseudogene       | 2  | 112645491 | 112646317 |            |
| ENSG00000236308 | 2.671945279 | 2.420525079 | antisense        | 10 | 101949793 | 101950504 |            |
| ENSG00000236310 | 0           | 0.697730409 | processed_transc | 7  | 41706766  | 41744933  |            |
| ENSG00000236311 | 0           | 0.390640832 | antisense        | 10 | 102849078 | 102901023 |            |
| ENSG00000236312 | 0           | 0.390640832 | pseudogene       | 19 | 22551401  | 22551754  |            |



|                 |             |             |                  |    |           |           |            |
|-----------------|-------------|-------------|------------------|----|-----------|-----------|------------|
| ENSG00000236316 | 0.499066092 | 0           | pseudogene       | 9  | 93504808  | 93505662  |            |
| ENSG00000236317 | 0.499066092 | 0.390640832 | pseudogene       | 1  | 213028517 | 213028708 |            |
| ENSG00000236318 | 0.499066092 | 0.390640832 | lincRNA          | 7  | 17414491  | 17506288  |            |
| ENSG00000236327 | 0.499066092 | 0.950786998 | pseudogene       | 1  | 153863071 | 153863338 |            |
| ENSG00000236330 | 1.16343121  | 0.390640832 | pseudogene       | 2  | 111725411 | 111726296 |            |
| ENSG00000236334 | 0.499066092 | 0           | protein_coding   | 1  | 143767144 | 143767881 | PPIAL4G    |
| ENSG00000236337 | 1.616589159 | 1.518964905 | sense_intronic   | X  | 147028461 | 147029103 | FMR1-IT1   |
| ENSG00000236345 | 0.869158192 | 0.390640832 | antisense        | 6  | 64516729  | 64532535  |            |
| ENSG00000236347 | 0.499066092 | 0           | lincRNA          | 6  | 113852320 | 113864995 |            |
| ENSG00000236348 | 0.499066092 | 0           | pseudogene       | 2  | 17566358  | 17567684  | PSMC1P10   |
| ENSG00000236349 | 0.499066092 | 0           | pseudogene       | 12 | 94942017  | 94943312  |            |
| ENSG00000236357 | 0           | 0.390640832 | pseudogene       | 3  | 175785830 | 175786696 |            |
| ENSG00000236358 | 0.869158192 | 1.518964905 | antisense        | 1  | 234492752 | 234501574 |            |
| ENSG00000236361 | 0.499066092 | 0           | lincRNA          | 9  | 40740776  | 40742447  |            |
| ENSG00000236364 | 1.960915222 | 3.411459265 | antisense        | 1  | 165865116 | 165869592 |            |
| ENSG00000236366 | 0           | 0.697730409 | lincRNA          | 6  | 142847592 | 142959026 |            |
| ENSG00000236370 | 3.146112541 | 2.144285137 | antisense        | 10 | 75556276  | 75561157  |            |
| ENSG00000236373 | 0           | 0.390640832 | lincRNA          | 10 | 92162278  | 92300562  |            |
| ENSG00000236375 | 0           | 0.390640832 | pseudogene       | 10 | 69770184  | 69770601  | POU5F1P5   |
| ENSG00000236383 | 2.847891871 | 3.081239798 | antisense        | 17 | 41368960  | 41381062  |            |
| ENSG00000236384 | 1.16343121  | 0.390640832 | processed_transc | 21 | 43131680  | 43135935  | LINC00479  |
| ENSG00000236391 | 0.499066092 | 0           | processed_transc | 2  | 174203068 | 174220936 |            |
| ENSG00000236393 | 3.393122761 | 2.912743273 | lincRNA          | X  | 40122170  | 40146973  |            |
| ENSG00000236394 | 0           | 0.697730409 | antisense        | 9  | 139947226 | 139947826 |            |
| ENSG00000236395 | 0           | 0.390640832 | pseudogene       | 7  | 131387028 | 131387412 |            |
| ENSG00000236397 | 1.16343121  | 2.242360793 | pseudogene       | 2  | 114356606 | 114359144 | DDX11L2    |
| ENSG00000236409 | 0.869158192 | 0           | pseudogene       | 3  | 47053032  | 47054636  | NRADDP     |
| ENSG00000236411 | 0.499066092 | 1.16600992  | pseudogene       | 3  | 37831412  | 37831936  |            |
| ENSG00000236423 | 0.869158192 | 3.027231696 | processed_transc | 1  | 3816936   | 3833789   |            |
| ENSG00000236427 | 1.407729925 | 0.950786998 | antisense        | 1  | 152178334 | 152179533 |            |
| ENSG00000236430 | 0           | 0.390640832 | pseudogene       | 1  | 203841702 | 203843315 | KRT8P29    |
| ENSG00000236431 | 2.10647801  | 2.334191469 | pseudogene       | 2  | 96201865  | 96202243  |            |
| ENSG00000236432 | 1.960915222 | 2.652276565 | antisense        | 2  | 228085768 | 228189917 |            |
| ENSG00000236434 | 0.869158192 | 0           | antisense        | 1  | 51730588  | 51731705  |            |
| ENSG00000236438 | 1.616589159 | 0.950786998 | protein_coding   | 3  | 197879237 | 197896723 | FAM157A    |
| ENSG00000236439 | 0.499066092 | 0.697730409 | pseudogene       | 1  | 202440937 | 202441258 |            |
| ENSG00000236440 | 0.869158192 | 0           | pseudogene       | 2  | 141440929 | 141441457 |            |
| ENSG00000236444 | 0.499066092 | 0.390640832 | pseudogene       | 13 | 31002084  | 31002656  | UBE2L5P    |
| ENSG00000236449 | 0.499066092 | 0           | processed_transc | 2  | 175411869 | 175639555 |            |
| ENSG00000236451 | 0.499066092 | 0.950786998 | lincRNA          | 2  | 221315400 | 221569286 |            |
| ENSG00000236453 | 3.335220907 | 3.608232228 | lincRNA          | 7  | 93652145  | 93695973  |            |
| ENSG00000236455 | 3.077135474 | 3.232099092 | antisense        | 7  | 30624316  | 30625588  |            |
| ENSG00000236456 | 0.869158192 | 1.16600992  | pseudogene       | 20 | 32833759  | 32834343  |            |
| ENSG00000236459 | 0           | 0.697730409 | pseudogene       | 3  | 42930853  | 42931798  | HNRNPA1P22 |
| ENSG00000236463 | 0.499066092 | 0           | lincRNA          | 13 | 30890497  | 30894040  | LINC00427  |
| ENSG00000236465 | 2.35979773  | 2.420525079 | pseudogene       | 9  | 128035814 | 128036159 |            |
| ENSG00000236468 | 0           | 0.950786998 | pseudogene       | 1  | 199356269 | 199357603 |            |
| ENSG00000236469 | 0.499066092 | 0           | processed_transc | 2  | 71229661  | 71291873  |            |
| ENSG00000236474 | 0.499066092 | 0.390640832 | pseudogene       | 20 | 18400804  | 18402098  | GCNT1P1    |
| ENSG00000236478 | 1.960915222 | 2.144285137 | pseudogene       | 2  | 217039617 | 217040755 |            |
| ENSG00000236480 | 2.57521082  | 2.579085888 | pseudogene       | 1  | 115078616 | 115080461 |            |
| ENSG00000236483 | 1.960915222 | 2.721932731 | pseudogene       | 19 | 12613489  | 12614920  |            |
| ENSG00000236484 | 0           | 0.390640832 | pseudogene       | 1  | 161348497 | 161349148 | RRM2P2     |
| ENSG00000236489 | 0.499066092 | 0.390640832 | pseudogene       | 3  | 185324363 | 185324661 |            |
| ENSG00000236493 | 2.10647801  | 2.721932731 | pseudogene       | 10 | 94428502  | 94429500  | EIF2S2P3   |
| ENSG00000236496 | 0           | 0.697730409 | pseudogene       | 9  | 2875449   | 2876427   |            |
| ENSG00000236498 | 2.238690726 | 1.518964905 | antisense        | 2  | 62095567  | 62113217  |            |
| ENSG00000236499 | 0.869158192 | 1.353254395 | protein_coding   | 22 | 20194100  | 20194706  |            |
| ENSG00000236502 | 0.499066092 | 0           | antisense        | 2  | 45167293  | 45169012  |            |
| ENSG00000236509 | 0.869158192 | 0.390640832 | pseudogene       | X  | 133741187 | 133741655 |            |
| ENSG00000236510 | 0           | 0.950786998 | antisense        | 7  | 3682447   | 3683416   |            |
| ENSG00000236512 | 0.499066092 | 0.390640832 | pseudogene       | 6  | 7620655   | 7621111   |            |
| ENSG00000236514 | 0.869158192 | 1.353254395 | antisense        | 10 | 38146668  | 38148038  |            |

|                 |             |             |                  |    |           |                      |
|-----------------|-------------|-------------|------------------|----|-----------|----------------------|
| ENSG00000236519 | 0.869158192 | 1.802319292 | antisense        | 21 | 46222492  | 46224632             |
| ENSG00000236523 | 0           | 0.697730409 | pseudogene       | 1  | 203224871 | 203225605            |
| ENSG00000236526 | 0           | 2.242360793 | antisense        | 20 | 11890052  | 11899325             |
| ENSG00000236527 | 0.869158192 | 1.16600992  | pseudogene       | 20 | 61503602  | 61504428 ARF4P2      |
| ENSG00000236528 | 0           | 0.390640832 | antisense        | 1  | 26186104  | 26189911             |
| ENSG00000236529 | 0           | 0.950786998 | pseudogene       | 7  | 65305199  | 65305583             |
| ENSG00000236530 | 0.499066092 | 0.950786998 | pseudogene       | 4  | 81000686  | 81002273             |
| ENSG00000236533 | 0.499066092 | 0           | pseudogene       | 2  | 42077343  | 42077741             |
| ENSG00000236534 | 0.499066092 | 0.697730409 | pseudogene       | 13 | 72249199  | 72249601 H3F3BP1     |
| ENSG00000236535 | 0.499066092 | 0           | sense_intronic   | 1  | 173978405 | 173985344 RC3H1-IT1  |
| ENSG00000236537 | 2.671945279 | 2.912743273 | lincRNA          | 6  | 158703295 | 158733390            |
| ENSG00000236539 | 0.869158192 | 0           | pseudogene       | 1  | 179425359 | 179426450            |
| ENSG00000236540 | 4.19837882  | 4.274079748 | antisense        | 22 | 20050503  | 20053600             |
| ENSG00000236542 | 0           | 0.950786998 | pseudogene       | 20 | 25650493  | 25651022             |
| ENSG00000236544 | 0           | 0.390640832 | antisense        | 7  | 155213901 | 155249794            |
| ENSG00000236545 | 0           | 1.353254395 | antisense        | 21 | 43290742  | 43292163             |
| ENSG00000236549 | 0           | 1.16600992  | pseudogene       | 2  | 48110594  | 48111048             |
| ENSG00000236552 | 3.502389126 | 4.021284656 | pseudogene       | 10 | 98510045  | 98510675 RPL13AP5    |
| ENSG00000236554 | 0           | 0.390640832 | pseudogene       | 13 | 100714550 | 100715855 ASNSP3     |
| ENSG00000236557 | 2.847891871 | 3.133298822 | protein_coding   | 21 | 10181168  | 10182885             |
| ENSG00000236558 | 1.407729925 | 0.950786998 | antisense        | 2  | 47713153  | 47715691             |
| ENSG00000236559 | 1.616589159 | 1.925536307 | antisense        | 20 | 30274019  | 30304628             |
| ENSG00000236562 | 0.499066092 | 0.390640832 | pseudogene       | 4  | 66959844  | 66960244             |
| ENSG00000236565 | 0.869158192 | 0.950786998 | pseudogene       | 13 | 66362064  | 66362896 HNRNPA3P5   |
| ENSG00000236567 | 0.869158192 | 0           | pseudogene       | 9  | 5110913   | 5112842              |
| ENSG00000236570 | 0.499066092 | 0           | pseudogene       | 3  | 18580165  | 18581391             |
| ENSG00000236577 | 1.407729925 | 0.697730409 | pseudogene       | 13 | 50063106  | 50063500 SNRPGP14    |
| ENSG00000236581 | 0.499066092 | 0           | antisense        | 13 | 33851690  | 33855471 STARD13-AS2 |
| ENSG00000236582 | 0.499066092 | 0           | pseudogene       | 10 | 17619361  | 17620211             |
| ENSG00000236583 | 1.16343121  | 1.353254395 | pseudogene       | 8  | 100245276 | 100246687            |
| ENSG00000236591 | 1.799000381 | 1.925536307 | antisense        | 6  | 149348836 | 149353709            |
| ENSG00000236603 | 1.407729925 | 0           | pseudogene       | 6  | 30453717  | 30454367 RANP1       |
| ENSG00000236605 | 0.499066092 | 0           | lincRNA          | 2  | 67551759  | 67552436             |
| ENSG00000236607 | 0           | 0.390640832 | pseudogene       | 11 | 61936765  | 61937300             |
| ENSG00000236608 | 0.869158192 | 0.950786998 | pseudogene       | 13 | 61211022  | 61212231 EIF4A1P6    |
| ENSG00000236609 | 1.616589159 | 1.353254395 | protein_coding   | 7  | 6655248   | 6663921 ZNF853       |
| ENSG00000236611 | 0.499066092 | 0.697730409 | lincRNA          | 22 | 23668803  | 23670680             |
| ENSG00000236616 | 0           | 0.390640832 | pseudogene       | 11 | 130416694 | 130417324 BAK1P2     |
| ENSG00000236617 | 1.407729925 | 1.802319292 | antisense        | 12 | 133464428 | 133465169            |
| ENSG00000236618 | 6.146643566 | 7.204272857 | antisense        | 17 | 1420225   | 1421389              |
| ENSG00000236624 | 5.848544806 | 5.466810074 | protein_coding   | 1  | 45959538  | 45965751 CCDC163P    |
| ENSG00000236636 | 0.869158192 | 1.518964905 | pseudogene       | 1  | 227451900 | 227452908            |
| ENSG00000236641 | 1.799000381 | 1.667587519 | lincRNA          | 22 | 25608709  | 25609652             |
| ENSG00000236643 | 0.869158192 | 0.697730409 | antisense        | 9  | 127532402 | 127535206            |
| ENSG00000236650 | 0.499066092 | 0.390640832 | pseudogene       | 22 | 25574049  | 25574727             |
| ENSG00000236651 | 1.799000381 | 0.390640832 | antisense        | 2  | 172967734 | 172974710            |
| ENSG00000236654 | 0.869158192 | 0           | pseudogene       | 7  | 23520372  | 23520578             |
| ENSG00000236658 | 0.499066092 | 1.16600992  | antisense        | 9  | 133809238 | 133820907            |
| ENSG00000236662 | 0.869158192 | 0.697730409 | processed_transc | 10 | 102740264 | 102745371            |
| ENSG00000236663 | 2.928422289 | 3.232099092 | antisense        | 21 | 44560633  | 44561202             |
| ENSG00000236667 | 0.499066092 | 0.390640832 | pseudogene       | 2  | 181803557 | 181804025            |
| ENSG00000236668 | 0           | 1.16600992  | antisense        | 9  | 126768556 | 126771675            |
| ENSG00000236670 | 0.869158192 | 1.353254395 | pseudogene       | 22 | 20837102  | 20838392 KRT18P5     |
| ENSG00000236671 | 2.671945279 | 1.667587519 | processed_transc | 10 | 53990519  | 54073888             |
| ENSG00000236673 | 0.499066092 | 0           | processed_transc | 6  | 132223103 | 132241705            |
| ENSG00000236675 | 4.618121645 | 3.748356452 | pseudogene       | 1  | 155200766 | 155204116 MTX1P1     |
| ENSG00000236680 | 0           | 0.390640832 | pseudogene       | 9  | 19026890  | 19028127             |
| ENSG00000236682 | 4.062237333 | 3.570966319 | processed_transc | 2  | 128146706 | 128158156            |
| ENSG00000236683 | 3.004694206 | 1.667587519 | pseudogene       | X  | 26766146  | 26767207 HMGA1P1     |
| ENSG00000236686 | 0           | 0.697730409 | pseudogene       | 3  | 172143640 | 172144879 BZW1P1     |
| ENSG00000236687 | 0.499066092 | 0           | lincRNA          | 9  | 134691579 | 134696375            |
| ENSG00000236698 | 1.960915222 | 1.925536307 | pseudogene       | 1  | 17012116  | 17012550             |
| ENSG00000236699 | 0           | 1.353254395 | protein_coding   | 4  | 106473777 | 106616835 ARHGEF38   |

|                 |             |             |                  |    |           |                     |
|-----------------|-------------|-------------|------------------|----|-----------|---------------------|
| ENSG00000236700 | 1.16343121  | 2.039052734 | lincRNA          | 6  | 134758854 | 134825719           |
| ENSG00000236703 | 0           | 0.390640832 | antisense        | 6  | 135516221 | 135517133 MYB-AS1   |
| ENSG00000236708 | 0           | 0.390640832 | antisense        | 7  | 3303664   | 3342084             |
| ENSG00000236709 | 0           | 0.390640832 | sense_intronic   | 9  | 90168369  | 90169374 DAPK1-IT1  |
| ENSG00000236710 | 1.16343121  | 0.697730409 | pseudogene       | 11 | 3105623   | 3106673             |
| ENSG00000236713 | 0           | 0.697730409 | pseudogene       | 1  | 150752748 | 150753120           |
| ENSG00000236714 | 0.869158192 | 0.950786998 | lincRNA          | 5  | 142125165 | 142140563           |
| ENSG00000236725 | 1.16343121  | 1.353254395 | pseudogene       | 9  | 70645650  | 70646409            |
| ENSG00000236732 | 0.869158192 | 0.697730409 | pseudogene       | 3  | 32192575  | 32193387            |
| ENSG00000236734 | 0.499066092 | 0           | processed_transc | 7  | 2514360   | 2516528 GRIFIN      |
| ENSG00000236735 | 1.799000381 | 1.16600992  | pseudogene       | X  | 67819926  | 67820315 RPL31P63   |
| ENSG00000236739 | 0.499066092 | 0.950786998 | pseudogene       | 9  | 22747699  | 22748227            |
| ENSG00000236740 | 0.499066092 | 0           | processed_transc | 6  | 53794820  | 53862465            |
| ENSG00000236745 | 0.869158192 | 0.950786998 | pseudogene       | 9  | 99717359  | 99717737 YRDCP2     |
| ENSG00000236750 | 0           | 0.950786998 | pseudogene       | 2  | 96307382  | 96307728            |
| ENSG00000236751 | 3.077135474 | 3.279072565 | lincRNA          | X  | 46185359  | 46187080            |
| ENSG00000236753 | 5.207774174 | 4.547834947 | processed_transc | 7  | 130994503 | 131012981           |
| ENSG00000236754 | 1.16343121  | 0.950786998 | antisense        | 22 | 18062923  | 18071958            |
| ENSG00000236760 | 0.869158192 | 0.697730409 | lincRNA          | 2  | 3135353   | 3149551             |
| ENSG00000236762 | 0           | 0.697730409 | pseudogene       | 10 | 122892604 | 122893237           |
| ENSG00000236768 | 0.499066092 | 1.353254395 | pseudogene       | 3  | 48162159  | 48162705            |
| ENSG00000236772 | 0.499066092 | 1.16600992  | antisense        | 20 | 31037558  | 31041410            |
| ENSG00000236775 | 0.499066092 | 0.390640832 | pseudogene       | 1  | 247178370 | 247180593           |
| ENSG00000236776 | 0.499066092 | 0           | pseudogene       | 1  | 57004124  | 57004583            |
| ENSG00000236778 | 0.499066092 | 0.390640832 | processed_transc | 13 | 52028283  | 52124128            |
| ENSG00000236779 | 0           | 0.390640832 | pseudogene       | 1  | 204497973 | 204498820           |
| ENSG00000236780 | 0           | 0.390640832 | lincRNA          | 2  | 67350489  | 67442451            |
| ENSG00000236782 | 0.869158192 | 0.697730409 | antisense        | 1  | 26496438  | 26498312            |
| ENSG00000236792 | 0.499066092 | 0           | pseudogene       | 1  | 192216635 | 192217077           |
| ENSG00000236796 | 0.499066092 | 0.950786998 | pseudogene       | 9  | 32836573  | 32869593            |
| ENSG00000236799 | 0.499066092 | 0           | lincRNA          | 10 | 116754416 | 116756352           |
| ENSG00000236801 | 2.238690726 | 1.925536307 | pseudogene       | 9  | 72832111  | 72832584            |
| ENSG00000236804 | 0.499066092 | 0.390640832 | pseudogene       | 1  | 119669162 | 119669914 RPS3AP12  |
| ENSG00000236806 | 0           | 0.950786998 | pseudogene       | 1  | 146695146 | 146695940           |
| ENSG00000236809 | 1.616589159 | 1.802319292 | pseudogene       | 1  | 211590367 | 211591276 SNX25P1   |
| ENSG00000236810 | 3.077135474 | 3.714580548 | antisense        | 1  | 24086872  | 24104777            |
| ENSG00000236811 | 2.671945279 | 1.353254395 | pseudogene       | 20 | 13373324  | 13374321 GAPDHP2    |
| ENSG00000236813 | 0.869158192 | 0           | pseudogene       | X  | 62986755  | 62987280 BTF3P8     |
| ENSG00000236814 | 0.499066092 | 1.518964905 | pseudogene       | 8  | 56962597  | 56963766            |
| ENSG00000236824 | 5.806547963 | 5.734544355 | lincRNA          | 2  | 47558199  | 47571656 BCYRN1     |
| ENSG00000236829 | 1.616589159 | 2.039052734 | processed_transc | 16 | 432097    | 442960              |
| ENSG00000236830 | 2.57521082  | 2.039052734 | processed_transc | 21 | 37504065  | 37528605            |
| ENSG00000236833 | 0.869158192 | 0.697730409 | processed_transc | 3  | 197387436 | 197392628           |
| ENSG00000236838 | 1.407729925 | 0.697730409 | antisense        | 17 | 2116991   | 2117922             |
| ENSG00000236844 | 1.960915222 | 2.501982735 | pseudogene       | 3  | 195281428 | 195281901           |
| ENSG00000236846 | 0           | 0.390640832 | lincRNA          | 1  | 223317391 | 223318296           |
| ENSG00000236848 | 1.407729925 | 1.16600992  | pseudogene       | 7  | 102792454 | 102792772           |
| ENSG00000236849 | 0.499066092 | 0           | lincRNA          | 9  | 75486644  | 75489025            |
| ENSG00000236850 | 7.35977471  | 7.452416987 | pseudogene       | 22 | 22657589  | 22677203            |
| ENSG00000236852 | 0           | 1.16600992  | pseudogene       | X  | 61998720  | 61999796            |
| ENSG00000236858 | 0           | 0.390640832 | lincRNA          | 22 | 27444106  | 27456480            |
| ENSG00000236859 | 4.593635215 | 5.125003832 | processed_transc | 2  | 122407226 | 122485784           |
| ENSG00000236861 | 0.869158192 | 1.16600992  | antisense        | 7  | 93598754  | 93640425            |
| ENSG00000236863 | 0.499066092 | 0           | pseudogene       | 1  | 235459180 | 235459648 RPL23AP23 |
| ENSG00000236867 | 0.869158192 | 2.144285137 | pseudogene       | 22 | 50210896  | 50211360            |
| ENSG00000236869 | 1.407729925 | 0.950786998 | processed_transc | 3  | 44598849  | 44727145            |
| ENSG00000236871 | 4.409500985 | 5.175534283 | lincRNA          | X  | 1515320   | 1518295 LINC00106   |
| ENSG00000236875 | 0           | 0.697730409 | pseudogene       | 9  | 11987     | 14522               |
| ENSG00000236876 | 0.869158192 | 1.16600992  | pseudogene       | 1  | 42965876  | 42966067 TMSB4XP1   |
| ENSG00000236878 | 1.16343121  | 0.390640832 | pseudogene       | 2  | 120968630 | 120969291           |
| ENSG00000236882 | 2.10647801  | 1.353254395 | protein_coding   | 5  | 95187936  | 95195837 C5orf27    |
| ENSG00000236887 | 0.499066092 | 0           | pseudogene       | 1  | 113741447 | 113741880           |
| ENSG00000236890 | 0           | 0.950786998 | pseudogene       | 22 | 18564232  | 18564441            |

|                 |             |             |                  |    |           |                       |
|-----------------|-------------|-------------|------------------|----|-----------|-----------------------|
| ENSG00000236896 | 2.238690726 | 2.334191469 | antisense        | 9  | 100748833 | 100749938             |
| ENSG00000236900 | 0           | 0.390640832 | pseudogene       | 10 | 76104308  | 76104563 TIMM9P1      |
| ENSG00000236901 | 6.204385613 | 5.863430791 | ncrna_host       | 9  | 125871773 | 125877756 MIR600HG    |
| ENSG00000236905 | 0.499066092 | 0.697730409 | pseudogene       | 1  | 212997369 | 212997846             |
| ENSG00000236908 | 2.471521042 | 3.279072565 | lincRNA          | 12 | 3427884   | 3434509               |
| ENSG00000236913 | 0.499066092 | 0.697730409 | pseudogene       | 2  | 42696957  | 42697406              |
| ENSG00000236914 | 0.869158192 | 1.925536307 | processed_transc | 15 | 38361682  | 38365160              |
| ENSG00000236919 | 0           | 0.390640832 | pseudogene       | 11 | 50205725  | 50206932              |
| ENSG00000236928 | 1.16343121  | 0.390640832 | pseudogene       | 7  | 65899621  | 65900465              |
| ENSG00000236933 | 1.616589159 | 0.950786998 | antisense        | 1  | 120835810 | 120838343             |
| ENSG00000236935 | 1.16343121  | 0.697730409 | antisense        | 11 | 64092522  | 64096976              |
| ENSG00000236936 | 1.407729925 | 0.950786998 | antisense        | 1  | 21592575  | 21593744              |
| ENSG00000236937 | 1.407729925 | 0.950786998 | pseudogene       | 10 | 104605352 | 104605702             |
| ENSG00000236938 | 0.499066092 | 0.697730409 | lincRNA          | 7  | 93701071  | 93706469              |
| ENSG00000236940 | 0.499066092 | 0.390640832 | pseudogene       | 1  | 151730135 | 151730918             |
| ENSG00000236942 | 0.869158192 | 1.667587519 | pseudogene       | 1  | 205594611 | 205595281             |
| ENSG00000236943 | 2.928422289 | 2.971122874 | antisense        | 1  | 144456138 | 144521970             |
| ENSG00000236944 | 0.499066092 | 0           | pseudogene       | 10 | 52722753  | 52723118              |
| ENSG00000236947 | 2.238690726 | 2.721932731 | lincRNA          | 1  | 156416204 | 156426369             |
| ENSG00000236953 | 1.407729925 | 2.242360793 | sense_intronic   | 13 | 21951116  | 21952013 ZDHC20-IT1   |
| ENSG00000236957 | 0           | 0.390640832 | pseudogene       | 1  | 157894855 | 157918861             |
| ENSG00000236961 | 0           | 0.390640832 | lincRNA          | 6  | 43690523  | 43705571              |
| ENSG00000236969 | 0           | 0.950786998 | pseudogene       | 2  | 91963970  | 91969195 GGT8P        |
| ENSG00000236972 | 0           | 0.697730409 | pseudogene       | 13 | 73674713  | 73675123 FABP5P1      |
| ENSG00000236973 | 0           | 0.390640832 | pseudogene       | 1  | 52172810  | 52173809 GAPDHP51     |
| ENSG00000236976 | 0.869158192 | 1.353254395 | pseudogene       | 7  | 63601916  | 63602779              |
| ENSG00000236977 | 0           | 0.390640832 | sense_intronic   | 2  | 198115582 | 198167243 ANKRD44-IT1 |
| ENSG00000236982 | 0           | 0.390640832 | pseudogene       | X  | 63946628  | 63946928              |
| ENSG00000236986 | 0           | 0.950786998 | antisense        | 9  | 134012047 | 134042795             |
| ENSG00000236991 | 1.616589159 | 0.950786998 | antisense        | 10 | 127433296 | 127439035             |
| ENSG00000236992 | 1.16343121  | 0.697730409 | pseudogene       | 20 | 19804087  | 19804587              |
| ENSG00000236993 | 0.499066092 | 0.950786998 | pseudogene       | 10 | 57427101  | 57428110 GAPDHP21     |
| ENSG00000236997 | 1.799000381 | 0.697730409 | antisense        | 1  | 11882854  | 11883337              |
| ENSG00000236998 | 0           | 0.390640832 | pseudogene       | 9  | 71403227  | 71404586              |
| ENSG00000237003 | 0           | 0.390640832 | pseudogene       | 1  | 93656297  | 93656617              |
| ENSG00000237004 | 4.734682531 | 4.319727133 | pseudogene       | 7  | 32767742  | 32769595 ZNRF2P1      |
| ENSG00000237007 | 0           | 0.390640832 | pseudogene       | 2  | 32047660  | 32048505 KRT18P52     |
| ENSG00000237008 | 0.499066092 | 0           | pseudogene       | 1  | 153352325 | 153353440             |
| ENSG00000237015 | 4.618121645 | 4.319727133 | antisense        | 22 | 29656878  | 29658026              |
| ENSG00000237017 | 3.698846687 | 3.679994897 | antisense        | 19 | 54622891  | 54628722              |
| ENSG00000237021 | 0.499066092 | 0.697730409 | processed_transc | 6  | 116575370 | 116576437             |
| ENSG00000237025 | 0.499066092 | 0.950786998 | pseudogene       | X  | 123012440 | 123013146             |
| ENSG00000237026 | 0.869158192 | 0.390640832 | pseudogene       | 7  | 64696164  | 64697097              |
| ENSG00000237030 | 1.16343121  | 0.390640832 | processed_transc | 13 | 113351145 | 113371989             |
| ENSG00000237036 | 3.698846687 | 5.072639111 | antisense        | 10 | 31596658  | 31608810 ZEB1-AS1     |
| ENSG00000237037 | 3.502389126 | 3.748356452 | processed_transc | 22 | 42486937  | 42533614              |
| ENSG00000237039 | 0           | 0.390640832 | pseudogene       | 2  | 232120810 | 232121019             |
| ENSG00000237054 | 1.799000381 | 2.501982735 | antisense        | 14 | 23388665  | 23392610 PRMT5-AS1    |
| ENSG00000237059 | 3.698846687 | 3.027231696 | antisense        | 7  | 33055671  | 33056504              |
| ENSG00000237063 | 0.499066092 | 0           | lincRNA          | 20 | 34674174  | 34676114              |
| ENSG00000237064 | 0           | 0.390640832 | pseudogene       | 7  | 109599275 | 109600241 EIF3IP1     |
| ENSG00000237068 | 0.499066092 | 0           | pseudogene       | 20 | 44119458  | 44120311 RPL5P2       |
| ENSG00000237073 | 0.499066092 | 0           | antisense        | 9  | 116332470 | 116352299             |
| ENSG00000237074 | 0.499066092 | 0           | lincRNA          | 1  | 207422412 | 207482466             |
| ENSG00000237077 | 0.499066092 | 0           | pseudogene       | 2  | 78015508  | 78020213              |
| ENSG00000237080 | 0           | 0.390640832 | antisense        | 6  | 31851538  | 31851831 EHMT2-AS1    |
| ENSG00000237081 | 0           | 0.697730409 | lincRNA          | 1  | 90421225  | 90422281              |
| ENSG00000237082 | 1.16343121  | 0.697730409 | pseudogene       | 13 | 101276129 | 101276683 COX5BP6     |
| ENSG00000237088 | 0           | 0.390640832 | pseudogene       | 9  | 20532550  | 20533337              |
| ENSG00000237094 | 3.871730003 | 3.570966319 | processed_transc | 1  | 320162    | 328453                |
| ENSG00000237101 | 0.869158192 | 1.353254395 | antisense        | 1  | 224407315 | 224415745             |
| ENSG00000237107 | 0           | 0.390640832 | pseudogene       | 6  | 42467448  | 42467760              |
| ENSG00000237115 | 0.499066092 | 0.697730409 | pseudogene       | 6  | 132147121 | 132149553             |

|                 |             |             |                  |    |           |           |            |
|-----------------|-------------|-------------|------------------|----|-----------|-----------|------------|
| ENSG00000237118 | 1.616589159 | 1.16600992  | pseudogene       | 19 | 41324626  | 41332677  | CYP2F1P    |
| ENSG00000237126 | 1.616589159 | 0.950786998 | antisense        | 2  | 233445658 | 233449247 |            |
| ENSG00000237128 | 0.499066092 | 0           | lincRNA          | 10 | 28721937  | 28784742  |            |
| ENSG00000237130 | 0.499066092 | 0           | pseudogene       | 1  | 51312140  | 51312509  | MRPS6P2    |
| ENSG00000237133 | 1.407729925 | 1.16600992  | antisense        | 2  | 33780114  | 33788614  |            |
| ENSG00000237135 | 0.869158192 | 1.518964905 | pseudogene       | 10 | 31207941  | 31210164  |            |
| ENSG00000237136 | 0.499066092 | 0           | protein_coding   | 4  | 146601356 | 146692184 | C4orf51    |
| ENSG00000237139 | 0.499066092 | 0           | pseudogene       | 10 | 75297561  | 75298149  |            |
| ENSG00000237149 | 0.869158192 | 3.133298822 | protein_coding   | 10 | 77161277  | 77168740  | ZNF503-AS2 |
| ENSG00000237154 | 0.869158192 | 0.390640832 | pseudogene       | 6  | 27375476  | 27375775  | MCFD2P1    |
| ENSG00000237161 | 1.960915222 | 2.144285137 | pseudogene       | 15 | 21936548  | 21938111  |            |
| ENSG00000237162 | 0.499066092 | 0           | pseudogene       | 2  | 63167051  | 63167417  |            |
| ENSG00000237167 | 0.499066092 | 0           | lincRNA          | 3  | 197185276 | 197193976 |            |
| ENSG00000237168 | 2.35979773  | 2.144285137 | pseudogene       | 1  | 149664577 | 149664889 |            |
| ENSG00000237172 | 7.603059879 | 7.582164879 | protein_coding   | 16 | 67182008  | 67185117  | B3GNT9     |
| ENSG00000237176 | 0.869158192 | 0.950786998 | pseudogene       | 12 | 60205883  | 60206357  |            |
| ENSG00000237181 | 1.616589159 | 3.453019579 | antisense        | 7  | 642822    | 648119    |            |
| ENSG00000237186 | 0           | 0.390640832 | pseudogene       | 3  | 57516072  | 57516694  |            |
| ENSG00000237187 | 4.821592551 | 3.781359661 | lincRNA          | 5  | 92746995  | 92921354  |            |
| ENSG00000237188 | 3.911897206 | 4.676215056 | processed_transc | 1  | 146644806 | 146646726 |            |
| ENSG00000237190 | 7.556308086 | 7.260948155 | protein_coding   | 5  | 133737778 | 133747589 | CDKN2AIPNL |
| ENSG00000237198 | 0.869158192 | 1.667587519 | protein_coding   | 9  | 46385691  | 46387031  |            |
| ENSG00000237200 | 0.869158192 | 0.950786998 | sense_intronic   | 1  | 22843967  | 22846201  | ZBTB40-IT1 |
| ENSG00000237202 | 3.502389126 | 1.16600992  | pseudogene       | 21 | 14492565  | 14493128  |            |
| ENSG00000237210 | 0.499066092 | 0           | pseudogene       | 7  | 55311940  | 55313374  |            |
| ENSG00000237211 | 0.869158192 | 0.390640832 | pseudogene       | X  | 84010144  | 84010854  | SETP4      |
| ENSG00000237212 | 0.499066092 | 0.390640832 | lincRNA          | 9  | 98857493  | 98864194  |            |
| ENSG00000237214 | 0.499066092 | 0.390640832 | pseudogene       | 22 | 41460056  | 41460640  |            |
| ENSG00000237222 | 0           | 0.390640832 | processed_transc | 3  | 194429150 | 194502897 |            |
| ENSG00000237225 | 0.499066092 | 0.697730409 | pseudogene       | X  | 130696712 | 130697808 |            |
| ENSG00000237232 | 2.928422289 | 3.279072565 | lincRNA          | 21 | 43429303  | 43445033  | ZNF295-AS1 |
| ENSG00000237238 | 4.618121645 | 4.622587519 | pseudogene       | 9  | 67327775  | 67334983  |            |
| ENSG00000237240 | 6.585843317 | 6.795524906 | protein_coding   | 12 | 6953963   | 6960433   |            |
| ENSG00000237243 | 0           | 0.390640832 | antisense        | 7  | 137638094 | 137642712 |            |
| ENSG00000237248 | 0.869158192 | 0.390640832 | processed_transc | 12 | 9392599   | 9395635   |            |
| ENSG00000237257 | 0           | 0.697730409 | pseudogene       | 9  | 81356636  | 81357660  | MTND2P8    |
| ENSG00000237259 | 0           | 0.390640832 | antisense        | 20 | 18294409  | 18295755  |            |
| ENSG00000237261 | 0.499066092 | 0.950786998 | pseudogene       | 2  | 90532368  | 90532626  |            |
| ENSG00000237262 | 0.499066092 | 0           | lincRNA          | 2  | 136835462 | 136836083 |            |
| ENSG00000237263 | 0.499066092 | 1.353254395 | pseudogene       | 13 | 42643068  | 42645229  | MAPK6PS3   |
| ENSG00000237264 | 2.671945279 | 2.912743273 | pseudogene       | 8  | 82433921  | 82434467  | FTH1P11    |
| ENSG00000237265 | 0.499066092 | 0           | processed_transc | X  | 70882845  | 70885603  |            |
| ENSG00000237268 | 4.381167248 | 4.585695337 | pseudogene       | 7  | 56489550  | 56516068  |            |
| ENSG00000237271 | 0           | 0.390640832 | lincRNA          | 2  | 205092860 | 205099708 |            |
| ENSG00000237273 | 1.407729925 | 1.802319292 | pseudogene       | 19 | 12207239  | 12207730  | RSL24D1P8  |
| ENSG00000237276 | 2.57521082  | 2.501982735 | protein_coding   | 1  | 16542404  | 16543823  | ANO7L1     |
| ENSG00000237280 | 0.499066092 | 0.390640832 | sense_intronic   | 10 | 88873711  | 88875280  |            |
| ENSG00000237281 | 0           | 0.697730409 | antisense        | 2  | 219191612 | 219222689 |            |
| ENSG00000237285 | 0           | 0.390640832 | pseudogene       | 6  | 32292996  | 32293955  | HNRNPA1P2  |
| ENSG00000237289 | 3.448790144 | 0.390640832 | protein_coding   | 15 | 43885252  | 43988917  | CKMT1B     |
| ENSG00000237291 | 0           | 1.518964905 | lincRNA          | 1  | 143154493 | 143169960 |            |
| ENSG00000237292 | 0           | 0.390640832 | lincRNA          | 1  | 181143620 | 181151344 |            |
| ENSG00000237296 | 1.960915222 | 1.353254395 | pseudogene       | 16 | 22448329  | 22503541  |            |
| ENSG00000237298 | 2.847891871 | 3.232099092 | processed_transc | 2  | 179387554 | 179484941 |            |
| ENSG00000237301 | 1.16343121  | 1.353254395 | processed_transc | 1  | 15912631  | 15930121  |            |
| ENSG00000237306 | 0           | 0.390640832 | pseudogene       | 9  | 94789780  | 94790106  |            |
| ENSG00000237307 | 1.616589159 | 0.697730409 | pseudogene       | X  | 136066582 | 136067864 | SRRM1P3    |
| ENSG00000237310 | 4.6658819   | 5.137803333 | lincRNA          | 7  | 65958693  | 65960461  |            |
| ENSG00000237328 | 1.16343121  | 1.518964905 | antisense        | 17 | 17662468  | 17674135  | RAI1-AS1   |
| ENSG00000237329 | 0.499066092 | 0.697730409 | pseudogene       | 1  | 31509616  | 31510090  |            |
| ENSG00000237330 | 3.744048221 | 1.16600992  | protein_coding   | 1  | 1007126   | 1009687   | RNF223     |
| ENSG00000237331 | 0.499066092 | 0           | antisense        | X  | 123006476 | 123007782 | XIAP-AS1   |
| ENSG00000237332 | 0.499066092 | 0           | pseudogene       | X  | 114658576 | 114660070 |            |

|                 |             |             |                  |   |    |           |           |           |
|-----------------|-------------|-------------|------------------|---|----|-----------|-----------|-----------|
| ENSG00000237338 | 1.16343121  | 0.390640832 | antisense        |   | 21 | 47571528  | 47572561  | FTCD-AS1  |
| ENSG00000237341 | 0           | 0.390640832 | antisense        | X |    | 49055425  | 49058913  | SYP-AS1   |
| ENSG00000237346 | 0           | 0.390640832 | lincRNA          |   | 6  | 14391462  | 14393519  |           |
| ENSG00000237347 | 0.869158192 | 0.950786998 | pseudogene       |   | 22 | 19043327  | 19044020  |           |
| ENSG00000237349 | 0.499066092 | 0.390640832 | pseudogene       |   | 1  | 109529585 | 109529867 |           |
| ENSG00000237350 | 1.407729925 | 1.925536307 | pseudogene       |   | 4  | 22728998  | 22729573  |           |
| ENSG00000237351 | 0.869158192 | 2.039052734 | pseudogene       | X |    | 47016037  | 47017598  |           |
| ENSG00000237352 | 0.499066092 | 0.390640832 | lincRNA          |   | 1  | 59522315  | 59553867  |           |
| ENSG00000237353 | 0.499066092 | 2.039052734 | protein_coding   |   | 11 | 125703211 | 125709964 | PATE4     |
| ENSG00000237356 | 1.407729925 | 2.334191469 | lincRNA          |   | 14 | 53635772  | 54153976  |           |
| ENSG00000237358 | 0           | 0.390640832 | pseudogene       |   | 22 | 17357442  | 17357792  |           |
| ENSG00000237359 | 0.499066092 | 0           | lincRNA          |   | 9  | 3647335   | 3648338   |           |
| ENSG00000237360 | 0           | 0.390640832 | pseudogene       |   | 9  | 110859712 | 110860190 |           |
| ENSG00000237361 | 0           | 0.390640832 | processed_transc |   | 13 | 44974487  | 44980002  |           |
| ENSG00000237364 | 0.869158192 | 0.950786998 | lincRNA          |   | 10 | 132001138 | 132001392 |           |
| ENSG00000237371 | 0.499066092 | 0.697730409 | antisense        |   | 20 | 62688156  | 62688437  |           |
| ENSG00000237373 | 0           | 0.390640832 | processed_transc |   | 21 | 40589019  | 40591731  | BRWD1-IT1 |
| ENSG00000237380 | 1.16343121  | 1.925536307 | antisense        |   | 2  | 176986339 | 177001826 |           |
| ENSG00000237382 | 0           | 1.518964905 | pseudogene       |   | 17 | 18216074  | 18216847  |           |
| ENSG00000237387 | 0           | 0.390640832 | antisense        |   | 22 | 25976208  | 25977349  |           |
| ENSG00000237390 | 0.869158192 | 0.697730409 | processed_transc |   | 1  | 156358018 | 156365401 |           |
| ENSG00000237399 | 4.6658819   | 4.385599336 | antisense        |   | 10 | 3183864   | 3204580   |           |
| ENSG00000237404 | 0           | 0.390640832 | lincRNA          |   | 6  | 19690056  | 19753344  |           |
| ENSG00000237406 | 0.869158192 | 0.697730409 | pseudogene       |   | 22 | 36293318  | 36294452  |           |
| ENSG00000237412 | 0.499066092 | 0           | pseudogene       |   | 2  | 233388570 | 233390435 |           |
| ENSG00000237413 | 0           | 0.390640832 | processed_transc |   | 1  | 78695283  | 78835149  |           |
| ENSG00000237415 | 0.499066092 | 0.950786998 | pseudogene       |   | 1  | 111390702 | 111391563 |           |
| ENSG00000237418 | 1.960915222 | 0.950786998 | pseudogene       |   | 3  | 196024932 | 196025086 |           |
| ENSG00000237423 | 0.499066092 | 0.697730409 | lincRNA          |   | 20 | 46609232  | 46617488  |           |
| ENSG00000237424 | 6.023726639 | 6.071200665 | antisense        |   | 1  | 47897805  | 47900313  |           |
| ENSG00000237425 | 0.499066092 | 0           | pseudogene       |   | 6  | 28699794  | 28700681  | RPSAP2    |
| ENSG00000237429 | 0.499066092 | 0           | antisense        |   | 1  | 27852316  | 27857072  |           |
| ENSG00000237432 | 0.499066092 | 0.390640832 | pseudogene       | X |    | 133784860 | 133785436 | RPS7P12   |
| ENSG00000237433 | 2.10647801  | 1.518964905 | pseudogene       |   | 3  | 32232239  | 32233119  |           |
| ENSG00000237436 | 0.499066092 | 1.16600992  | antisense        |   | 1  | 6843952   | 6844903   |           |
| ENSG00000237437 | 3.652182994 | 3.679994897 | pseudogene       |   | 9  | 32945994  | 32947220  | ASS1P12   |
| ENSG00000237438 | 4.962122459 | 5.466810074 | lincRNA          |   | 22 | 17517460  | 17539682  | CECR7     |
| ENSG00000237440 | 7.334137164 | 7.507697912 | protein_coding   |   | 19 | 20720799  | 20748626  | ZNF737    |
| ENSG00000237441 | 8.899456749 | 9.222677059 | protein_coding   |   | 6  | 33259431  | 33267176  | RGL2      |
| ENSG00000237445 | 0           | 0.390640832 | lincRNA          |   | 1  | 13983806  | 13987033  |           |
| ENSG00000237447 | 1.616589159 | 1.353254395 | pseudogene       | Y |    | 10027986  | 10029907  | CDC27P2   |
| ENSG00000237452 | 0           | 0.697730409 | protein_coding   |   | 19 | 46236509  | 46264988  |           |
| ENSG00000237453 | 0.499066092 | 0.390640832 | antisense        |   | 1  | 55258558  | 55260578  |           |
| ENSG00000237461 | 0.499066092 | 0           | processed_transc |   | 9  | 102348068 | 102582171 |           |
| ENSG00000237470 | 1.407729925 | 2.144285137 | pseudogene       |   | 10 | 15057071  | 15130775  |           |
| ENSG00000237471 | 0           | 0.950786998 | lincRNA          |   | 7  | 46009256  | 46019790  |           |
| ENSG00000237472 | 0.499066092 | 0           | pseudogene       |   | 22 | 23330438  | 23330756  |           |
| ENSG00000237476 | 3.335220907 | 2.579085888 | lincRNA          |   | 22 | 21311380  | 21318967  |           |
| ENSG00000237481 | 0.499066092 | 0.950786998 | antisense        |   | 1  | 229455150 | 229458834 |           |
| ENSG00000237483 | 0           | 0.697730409 | pseudogene       |   | 3  | 171943218 | 171943662 |           |
| ENSG00000237487 | 0.499066092 | 0           | pseudogene       |   | 9  | 38504444  | 38505479  | VN1R48P   |
| ENSG00000237489 | 3.830412367 | 4.547834947 | lincRNA          |   | 10 | 131864638 | 131909081 |           |
| ENSG00000237491 | 1.799000381 | 1.518964905 | processed_transc |   | 1  | 714162    | 740255    |           |
| ENSG00000237493 | 1.16343121  | 1.925536307 | pseudogene       |   | 12 | 56374216  | 56374819  |           |
| ENSG00000237499 | 1.616589159 | 2.971122874 | processed_transc |   | 6  | 138178423 | 138188841 |           |
| ENSG00000237502 | 0.499066092 | 0.697730409 | antisense        |   | 6  | 149896841 | 149897260 |           |
| ENSG00000237505 | 1.616589159 | 1.925536307 | processed_transc |   | 1  | 89003196  | 89150887  |           |
| ENSG00000237506 | 0.499066092 | 0.697730409 | pseudogene       | X |    | 86958277  | 86959307  | RPSAP9    |
| ENSG00000237510 | 5.346128795 | 5.516660875 | pseudogene       |   | 2  | 96455402  | 96465916  |           |
| ENSG00000237512 | 0.869158192 | 0.697730409 | antisense        |   | 10 | 72976981  | 72977969  |           |
| ENSG00000237513 | 1.16343121  | 0           | processed_transc |   | 7  | 104581510 | 104602781 |           |
| ENSG00000237514 | 0.499066092 | 0           | pseudogene       |   | 1  | 176585404 | 176585925 | PTP4A1P7  |
| ENSG00000237515 | 0.499066092 | 1.16600992  | protein_coding   |   | 16 | 12995455  | 13334272  | SHISA9    |

|                 |             |             |                  |    |           |           |            |
|-----------------|-------------|-------------|------------------|----|-----------|-----------|------------|
| ENSG00000237517 | 5.81716234  | 4.903073497 | antisense        | 22 | 18958027  | 19018742  | DGCR5      |
| ENSG00000237522 | 3.911897206 | 3.781359661 | pseudogene       | 2  | 61163954  | 61165184  | NONOP2     |
| ENSG00000237523 | 4.77879189  | 5.150490275 | processed_transc | 10 | 81967466  | 81979413  |            |
| ENSG00000237525 | 0           | 0.390640832 | lincRNA          | 2  | 216397856 | 216578618 |            |
| ENSG00000237531 | 0           | 0.390640832 | lincRNA          | X  | 950956    | 955100    |            |
| ENSG00000237539 | 1.407729925 | 1.16600992  | pseudogene       | X  | 15664290  | 15664998  |            |
| ENSG00000237543 | 0           | 0.390640832 | processed_transc | 9  | 69146939  | 69149621  |            |
| ENSG00000237548 | 0.499066092 | 1.16600992  | processed_transc | 9  | 124646915 | 124725998 | C9orf148   |
| ENSG00000237550 | 0.869158192 | 0.390640832 | pseudogene       | 15 | 82664416  | 82748784  | RPL9P9     |
| ENSG00000237569 | 0.869158192 | 0.390640832 | pseudogene       | 21 | 24779978  | 24781448  | TUBAP      |
| ENSG00000237575 | 0.499066092 | 1.16600992  | processed_transc | 17 | 26553840  | 26555091  | PYY2       |
| ENSG00000237584 | 0.499066092 | 0           | pseudogene       | X  | 136523417 | 136523995 | RAC1P4     |
| ENSG00000237586 | 0           | 0.697730409 | pseudogene       | 8  | 125313556 | 125314045 |            |
| ENSG00000237594 | 3.004694206 | 3.133298822 | lincRNA          | 21 | 32931537  | 32932800  |            |
| ENSG00000237595 | 1.616589159 | 1.802319292 | lincRNA          | 20 | 48780001  | 48782639  |            |
| ENSG00000237596 | 2.471521042 | 5.072639111 | antisense        | 6  | 136415853 | 136546733 |            |
| ENSG00000237604 | 3.146112541 | 4.048652948 | lincRNA          | 21 | 45595372  | 45596336  |            |
| ENSG00000237605 | 0           | 0.697730409 | antisense        | 1  | 206807994 | 206808967 |            |
| ENSG00000237609 | 0.869158192 | 1.16600992  | lincRNA          | 21 | 40400461  | 40401053  |            |
| ENSG00000237611 | 1.407729925 | 1.667587519 | pseudogene       | 1  | 54565641  | 54565897  |            |
| ENSG00000237614 | 0.499066092 | 0           | lincRNA          | 2  | 121300485 | 121301902 |            |
| ENSG00000237617 | 1.616589159 | 0.390640832 | pseudogene       | 2  | 174570676 | 174570876 |            |
| ENSG00000237627 | 0.499066092 | 0           | pseudogene       | 17 | 76244574  | 76250497  | THA1P      |
| ENSG00000237629 | 0.499066092 | 0.950786998 | pseudogene       | 2  | 26217663  | 26217950  | UQRHP2     |
| ENSG00000237631 | 0.869158192 | 0.390640832 | pseudogene       | 9  | 98680418  | 98680982  |            |
| ENSG00000237632 | 0.499066092 | 0           | pseudogene       | 7  | 102902447 | 102902758 | S100A11P1  |
| ENSG00000237641 | 1.16343121  | 1.667587519 | pseudogene       | 2  | 232654191 | 232654597 |            |
| ENSG00000237643 | 3.077135474 | 3.232099092 | lincRNA          | 6  | 71104590  | 71109120  |            |
| ENSG00000237644 | 1.799000381 | 0.697730409 | antisense        | 13 | 20252830  | 20253837  | PSPC1-AS1  |
| ENSG00000237646 | 0           | 0.390640832 | sense_intronic   | 21 | 38176285  | 38178585  | HLCS-IT1   |
| ENSG00000237649 | 9.628700366 | 9.656512011 | protein_coding   | 6  | 33359313  | 33377701  | KIFC1      |
| ENSG00000237661 | 1.16343121  | 0.697730409 | pseudogene       | X  | 40691097  | 40691815  |            |
| ENSG00000237664 | 1.616589159 | 1.16600992  | lincRNA          | 21 | 46758505  | 46761905  | LINC00316  |
| ENSG00000237668 | 1.407729925 | 1.667587519 | pseudogene       | 22 | 36817318  | 36817689  |            |
| ENSG00000237669 | 2.57521082  | 4.048652948 | pseudogene       | 6  | 29973898  | 29974893  | HCG4P3     |
| ENSG00000237672 | 1.616589159 | 1.16600992  | pseudogene       | 13 | 20644390  | 20646276  | KRR1P1     |
| ENSG00000237676 | 0.499066092 | 0           | pseudogene       | 3  | 32676714  | 32677046  |            |
| ENSG00000237679 | 1.407729925 | 0.950786998 | pseudogene       | 9  | 97049987  | 97050830  |            |
| ENSG00000237683 | 7.123655438 | 6.50081754  | pseudogene       | 1  | 134901    | 139697    |            |
| ENSG00000237685 | 1.16343121  | 1.16600992  | processed_transc | 6  | 10511269  | 10514779  |            |
| ENSG00000237686 | 5.223818625 | 4.15321211  | processed_transc | 6  | 43963460  | 44042389  |            |
| ENSG00000237688 | 0.499066092 | 0           | lincRNA          | 1  | 201084904 | 201096312 |            |
| ENSG00000237689 | 1.407729925 | 0.950786998 | lincRNA          | 22 | 17350368  | 17352016  |            |
| ENSG00000237693 | 0.499066092 | 1.16600992  | protein_coding   | 5  | 150226085 | 150280298 | IRGM       |
| ENSG00000237697 | 2.471521042 | 1.16600992  | lincRNA          | 3  | 8614371   | 8615561   | LINC00312  |
| ENSG00000237705 | 0.499066092 | 0.390640832 | antisense        | 5  | 56137843  | 56157991  |            |
| ENSG00000237709 | 0           | 0.697730409 | pseudogene       | 7  | 88268328  | 88269730  | EEF1A1P28  |
| ENSG00000237714 | 0.499066092 | 0           | antisense        | 5  | 131520569 | 131528501 | P4HA2-AS1  |
| ENSG00000237718 | 1.799000381 | 1.353254395 | antisense        | 16 | 67648284  | 67649245  |            |
| ENSG00000237719 | 3.448790144 | 3.027231696 | pseudogene       | 6  | 36059768  | 36060423  |            |
| ENSG00000237721 | 0.499066092 | 1.925536307 | lincRNA          | 21 | 40378574  | 40383255  |            |
| ENSG00000237729 | 1.407729925 | 1.518964905 | pseudogene       | 7  | 93299138  | 93299389  |            |
| ENSG00000237730 | 0           | 0.390640832 | pseudogene       | X  | 6340133   | 6340742   |            |
| ENSG00000237732 | 0.869158192 | 0.697730409 | antisense        | 2  | 223182996 | 223186441 |            |
| ENSG00000237737 | 0.499066092 | 0.950786998 | processed_transc | 2  | 74612613  | 74621009  |            |
| ENSG00000237738 | 0.869158192 | 0.697730409 | sense_intronic   | 7  | 5702063   | 5720092   | RNF216-IT1 |
| ENSG00000237746 | 0.499066092 | 0           | pseudogene       | 10 | 28627483  | 28629871  |            |
| ENSG00000237748 | 0           | 0.697730409 | pseudogene       | X  | 56763675  | 56764010  | UQRBP1     |
| ENSG00000237749 | 1.616589159 | 1.802319292 | pseudogene       | 1  | 38021843  | 38022108  |            |
| ENSG00000237753 | 4.352265886 | 3.532712221 | processed_transc | 2  | 113399409 | 113403267 |            |
| ENSG00000237756 | 1.16343121  | 1.353254395 | lincRNA          | 1  | 163229640 | 163230449 |            |
| ENSG00000237757 | 1.16343121  | 1.16600992  | pseudogene       | X  | 119344309 | 119346528 | EEF1A1P30  |
| ENSG00000237758 | 1.407729925 | 1.16600992  | pseudogene       | 2  | 231589858 | 231590118 |            |

|                 |             |             |                  |    |           |                     |
|-----------------|-------------|-------------|------------------|----|-----------|---------------------|
| ENSG00000237764 | 0           | 0.390640832 | processed_transc | 7  | 124812272 | 125019375           |
| ENSG00000237765 | 6.535310252 | 7.650745242 | protein_coding   | 4  | 15683285  | 15707188 FAM200B    |
| ENSG00000237766 | 0.499066092 | 1.353254395 | pseudogene       | 12 | 67659622  | 67660746            |
| ENSG00000237768 | 0.499066092 | 0           | antisense        | 10 | 74831101  | 74833766            |
| ENSG00000237772 | 0.869158192 | 0           | lincRNA          | 2  | 139362080 | 139370737           |
| ENSG00000237773 | 1.799000381 | 1.518964905 | antisense        | 7  | 17319458  | 17338981            |
| ENSG00000237774 | 0.869158192 | 1.667587519 | pseudogene       | 12 | 95519536  | 95520165            |
| ENSG00000237775 | 0.499066092 | 0           | antisense        | 6  | 30834759  | 30843695 TIGD1L     |
| ENSG00000237779 | 2.57521082  | 2.144285137 | sense_intronic   | 2  | 71601068  | 71602662 ZNF638-IT1 |
| ENSG00000237781 | 4.543379137 | 4.508954154 | antisense        | 1  | 150521040 | 150530949           |
| ENSG00000237784 | 0           | 0.390640832 | pseudogene       | 2  | 235238127 | 235238482           |
| ENSG00000237786 | 0           | 0.390640832 | antisense        | 6  | 13486526  | 13487084 GFOD1-AS1  |
| ENSG00000237788 | 1.407729925 | 0.950786998 | pseudogene       | 20 | 48445662  | 48447622            |
| ENSG00000237792 | 0           | 0.390640832 | pseudogene       | 9  | 65585692  | 65661972            |
| ENSG00000237793 | 1.616589159 | 2.039052734 | pseudogene       | X  | 152927611 | 152928147 RPL18AP16 |
| ENSG00000237794 | 1.407729925 | 0.697730409 | pseudogene       | 1  | 171308440 | 171309103 TOP1P1    |
| ENSG00000237796 | 0.499066092 | 0.950786998 | antisense        | 13 | 95954705  | 95956401 LINC00361  |
| ENSG00000237799 | 0.499066092 | 0.390640832 | pseudogene       | 7  | 55804472  | 55807289 CICIP1     |
| ENSG00000237803 | 0.499066092 | 0.697730409 | lincRNA          | 2  | 38053390  | 38103417 LINC00211  |
| ENSG00000237804 | 0           | 0.390640832 | pseudogene       | 2  | 175174743 | 175175702           |
| ENSG00000237805 | 0.869158192 | 1.667587519 | antisense        | 17 | 34195971  | 34212867            |
| ENSG00000237807 | 4.517578978 | 2.501982735 | lincRNA          | 8  | 54427731  | 54436491            |
| ENSG00000237813 | 2.57521082  | 0.697730409 | antisense        | 7  | 115878312 | 116139600           |
| ENSG00000237815 | 1.407729925 | 1.16600992  | pseudogene       | 7  | 76689662  | 76689796            |
| ENSG00000237819 | 1.16343121  | 1.667587519 | antisense        | 7  | 92465797  | 92546501            |
| ENSG00000237821 | 0           | 0.390640832 | pseudogene       | 7  | 132854174 | 132855272           |
| ENSG00000237822 | 0.499066092 | 0.390640832 | sense_intronic   | 13 | 96567601  | 96568330 UGGT2-IT1  |
| ENSG00000237827 | 0.499066092 | 0.390640832 | pseudogene       | 10 | 104884774 | 104885173           |
| ENSG00000237828 | 1.407729925 | 0.697730409 | pseudogene       | X  | 120002465 | 120003661 PA2G4P1   |
| ENSG00000237836 | 0.499066092 | 0.950786998 | antisense        | X  | 18908414  | 18912615            |
| ENSG00000237840 | 0.499066092 | 1.518964905 | pseudogene       | 10 | 46201879  | 46217887            |
| ENSG00000237842 | 0           | 1.16600992  | pseudogene       | 1  | 157029023 | 157030554           |
| ENSG00000237845 | 0.499066092 | 0           | lincRNA          | 1  | 236105853 | 236107105           |
| ENSG00000237846 | 0           | 0.390640832 | pseudogene       | 9  | 42250840  | 42251545            |
| ENSG00000237847 | 1.616589159 | 0.950786998 | protein_coding   | 1  | 16999498  | 17000007            |
| ENSG00000237849 | 0.499066092 | 0           | pseudogene       | 13 | 64549584  | 64550555 NFYAP1     |
| ENSG00000237851 | 0.499066092 | 0           | lincRNA          | 6  | 143109260 | 143115223           |
| ENSG00000237852 | 0.499066092 | 0           | sense_intronic   | 1  | 65952089  | 65959871            |
| ENSG00000237853 | 0.499066092 | 0           | antisense        | 1  | 61714617  | 61719182            |
| ENSG00000237854 | 4.464551814 | 4.693656882 | processed_transc | 17 | 66097708  | 66111659            |
| ENSG00000237857 | 4.026095388 | 3.845183986 | lincRNA          | 9  | 98177781  | 98189078            |
| ENSG00000237861 | 0           | 0.390640832 | pseudogene       | 1  | 197191352 | 197192385           |
| ENSG00000237862 | 2.847891871 | 0.950786998 | lincRNA          | 22 | 37748230  | 37750879            |
| ENSG00000237864 | 0.499066092 | 0           | processed_transc | 21 | 44742297  | 44751919 LINC00322  |
| ENSG00000237866 | 0.499066092 | 0.950786998 | antisense        | 10 | 126617452 | 126619962           |
| ENSG00000237870 | 2.847891871 | 0.950786998 | processed_transc | 7  | 115915660 | 115926788           |
| ENSG00000237872 | 0.499066092 | 0.950786998 | pseudogene       | 1  | 155402969 | 155404046 POU5F1P4  |
| ENSG00000237877 | 0.499066092 | 1.518964905 | lincRNA          | 2  | 186897872 | 186947960           |
| ENSG00000237879 | 0           | 0.390640832 | lincRNA          | 13 | 31377343  | 31384782 LINC00398  |
| ENSG00000237882 | 1.407729925 | 1.353254395 | pseudogene       | 10 | 76849006  | 76849483 PPIAP13    |
| ENSG00000237883 | 3.554067925 | 3.993387124 | antisense        | 2  | 74174769  | 74208568 DGUOK-AS1  |
| ENSG00000237886 | 4.491309013 | 4.622587519 | antisense        | 9  | 139440664 | 139444345           |
| ENSG00000237887 | 0.499066092 | 0.390640832 | pseudogene       | 2  | 54756480  | 54756938            |
| ENSG00000237888 | 0           | 1.16600992  | pseudogene       | 17 | 41553566  | 41554033            |
| ENSG00000237892 | 2.238690726 | 1.667587519 | sense_intronic   | 2  | 207985608 | 207986768 KLF7-IT1  |
| ENSG00000237895 | 1.407729925 | 1.16600992  | sense_intronic   | 1  | 28356225  | 28357423 EYA3-IT1   |
| ENSG00000237897 | 0.499066092 | 0           | pseudogene       | 1  | 106433315 | 106434052           |
| ENSG00000237899 | 1.16343121  | 0.950786998 | lincRNA          | 1  | 41134761  | 41153260            |
| ENSG00000237903 | 1.16343121  | 1.16600992  | sense_intronic   | X  | 118556880 | 118557510           |
| ENSG00000237911 | 0           | 0.390640832 | pseudogene       | 17 | 20319106  | 20320016 SRP68P3    |
| ENSG00000237914 | 1.16343121  | 0           | processed_transc | 20 | 1614154   | 1629118             |
| ENSG00000237916 | 1.16343121  | 1.353254395 | pseudogene       | 2  | 110310113 | 110310423           |
| ENSG00000237927 | 1.16343121  | 2.501982735 | lincRNA          | 6  | 160007987 | 160010201           |



|                 |             |             |                    |   |    |           |                     |
|-----------------|-------------|-------------|--------------------|---|----|-----------|---------------------|
| ENSG00000237931 | 1.16343121  | 0.950786998 | pseudogene         | X |    | 40936252  | 40937003            |
| ENSG00000237934 | 1.799000381 | 1.518964905 | antisense          |   | 1  | 29550445  | 29551328            |
| ENSG00000237938 | 2.238690726 | 2.039052734 | antisense          |   | 1  | 16049214  | 16063391            |
| ENSG00000237940 | 1.407729925 | 2.039052734 | processed_transc   |   | 2  | 242912834 | 242919427           |
| ENSG00000237945 | 2.10647801  | 2.579085888 | processed_transc   |   | 21 | 35303464  | 35349992            |
| ENSG00000237950 | 2.238690726 | 2.788380093 | antisense          |   | 1  | 44410042  | 44412223            |
| ENSG00000237959 | 0           | 0.390640832 | pseudogene         |   | 1  | 89043563  | 89043884            |
| ENSG00000237961 | 0           | 0.390640832 | pseudogene         |   | 4  | 49239116  | 49247435            |
| ENSG00000237972 | 2.35979773  | 2.144285137 | pseudogene         |   | 7  | 43958296  | 43959653 TUBG1P     |
| ENSG00000237973 | 13.36297974 | 12.93177906 | pseudogene         |   | 1  | 566454    | 567996              |
| ENSG00000237975 | 4.821592551 | 5.656642807 | processed_transc   |   | 1  | 152161827 | 152339163           |
| ENSG00000237976 | 0.869158192 | 2.039052734 | antisense          |   | 1  | 151319443 | 151320503           |
| ENSG00000237977 | 3.004694206 | 3.027231696 | pseudogene         |   | 22 | 31298206  | 31298768            |
| ENSG00000237979 | 1.407729925 | 1.353254395 | pseudogene         |   | 2  | 65728127  | 65729272            |
| ENSG00000237980 | 0.499066092 | 0           | lincRNA            |   | 1  | 212827341 | 212838776           |
| ENSG00000237982 | 0.499066092 | 0.390640832 | pseudogene         |   | 3  | 38311774  | 38312258            |
| ENSG00000237984 | 1.799000381 | 1.518964905 | pseudogene         |   | 9  | 33673502  | 33677497 PTENP1     |
| ENSG00000237987 | 0           | 0.390640832 | lincRNA            |   | 6  | 168625959 | 168627197           |
| ENSG00000237988 | 0           | 1.802319292 | pseudogene         |   | 6  | 29520996  | 29521943 OR211P     |
| ENSG00000237989 | 0.499066092 | 0           | processed_transc   |   | 21 | 44778027  | 44782229            |
| ENSG00000237991 | 0.869158192 | 1.925536307 | pseudogene         |   | 1  | 237144639 | 237145008 RPL35P1   |
| ENSG00000237993 | 0.499066092 | 0           | antisense          |   | 1  | 116556434 | 116560326           |
| ENSG00000237996 | 1.16343121  | 1.802319292 | sense_intronic     |   | 10 | 114843553 | 114846535           |
| ENSG00000237998 | 1.616589159 | 0.697730409 | antisense          |   | 10 | 72622528  | 72626426            |
| ENSG00000237999 | 0.869158192 | 0           | pseudogene         |   | 9  | 103493522 | 103494621           |
| ENSG00000238000 | 1.616589159 | 2.039052734 | pseudogene         |   | 5  | 97549106  | 97549825            |
| ENSG00000238001 | 0.499066092 | 1.353254395 | pseudogene         |   | 9  | 32676066  | 32676518            |
| ENSG00000238003 | 0           | 0.697730409 | pseudogene         |   | 1  | 201947770 | 201948077           |
| ENSG00000238005 | 1.16343121  | 1.16600992  | lincRNA            |   | 1  | 235093089 | 235105809           |
| ENSG00000238008 | 0           | 0.390640832 | pseudogene         |   | 3  | 33596128  | 33596351            |
| ENSG00000238009 | 2.847891871 | 2.579085888 | antisense          |   | 1  | 89295     | 133566              |
| ENSG00000238018 | 3.652182994 | 2.851901313 | antisense          |   | 2  | 54888148  | 54889929            |
| ENSG00000238024 | 0           | 0.390640832 | pseudogene         |   | 6  | 29960986  | 29961382 DDX39BP2   |
| ENSG00000238029 | 0           | 0.390640832 | pseudogene         |   | 2  | 101041810 | 101042569           |
| ENSG00000238031 | 0.499066092 | 0           | lincRNA            |   | 3  | 194548619 | 194553321           |
| ENSG00000238033 | 0           | 0.697730409 | lincRNA            |   | 7  | 22689579  | 22705152            |
| ENSG00000238039 | 0           | 1.518964905 | processed_transc X |   |    | 148593039 | 148607803           |
| ENSG00000238041 | 0.499066092 | 0.950786998 | pseudogene         |   | 11 | 56457941  | 56458199            |
| ENSG00000238042 | 2.10647801  | 1.16600992  | lincRNA            |   | 1  | 222054323 | 222151865           |
| ENSG00000238045 | 5.072559152 | 5.923798455 | antisense          |   | 16 | 29819966  | 29831687            |
| ENSG00000238055 | 0           | 0.390640832 | pseudogene         |   | 6  | 108639283 | 108639608           |
| ENSG00000238057 | 0           | 0.390640832 | antisense          |   | 2  | 145275982 | 145278683 ZEB2-AS1  |
| ENSG00000238058 | 2.10647801  | 3.411459265 | antisense          |   | 9  | 138799658 | 138805359           |
| ENSG00000238061 | 0           | 0.697730409 | pseudogene         |   | 1  | 185249976 | 185250954           |
| ENSG00000238062 | 1.616589159 | 2.242360793 | processed_transc   |   | 2  | 231849083 | 231860747           |
| ENSG00000238068 | 0.869158192 | 0           | antisense          | X |    | 47915699  | 47925971 ZNF630-AS1 |
| ENSG00000238072 | 0           | 0.390640832 | pseudogene         |   | 7  | 129049954 | 129050211           |
| ENSG00000238076 | 0.869158192 | 0.950786998 | pseudogene         |   | 6  | 10460139  | 10460774            |
| ENSG00000238077 | 0           | 0.390640832 | pseudogene         |   | 3  | 189884553 | 189885440           |
| ENSG00000238078 | 0           | 0.390640832 | lincRNA            |   | 1  | 221002597 | 221005771           |
| ENSG00000238079 | 0           | 0.390640832 | pseudogene         |   | 6  | 108693976 | 108694131           |
| ENSG00000238082 | 1.799000381 | 2.420525079 | pseudogene         |   | 2  | 179319443 | 179320155           |
| ENSG00000238083 | 3.448790144 | 3.411459265 | protein_coding     |   | 17 | 44590076  | 44633016 LRRC37A2   |
| ENSG00000238085 | 2.35979773  | 2.144285137 | pseudogene         |   | 1  | 241161751 | 241162094           |
| ENSG00000238086 | 0.869158192 | 0.697730409 | pseudogene         |   | 13 | 48890999  | 48894611 PPP1R26P1  |
| ENSG00000238090 | 0.499066092 | 0.390640832 | pseudogene         |   | 7  | 33419576  | 33420498            |
| ENSG00000238092 | 0           | 0.697730409 | pseudogene         |   | 19 | 43285358  | 43290747 CEACAMP6   |
| ENSG00000238098 | 4.77879189  | 5.446377228 | pseudogene         |   | 16 | 2389151   | 2476700 ABCA17P     |
| ENSG00000238103 | 0           | 1.16600992  | pseudogene         | X |    | 23854761  | 23855459 RPL9P7     |
| ENSG00000238105 | 6.560798025 | 6.310446475 | pseudogene         |   | 12 | 100550135 | 100567437           |
| ENSG00000238107 | 0.499066092 | 0.697730409 | lincRNA            |   | 1  | 147767287 | 147769663           |
| ENSG00000238109 | 2.238690726 | 1.518964905 | pseudogene         |   | 7  | 98596161  | 98597553            |
| ENSG00000238113 | 2.847891871 | 2.501982735 | processed_transc   |   | 9  | 66457285  | 66470542            |

|                 |             |             |                  |   |    |           |                     |
|-----------------|-------------|-------------|------------------|---|----|-----------|---------------------|
| ENSG00000238116 | 0           | 0.697730409 | pseudogene       | X |    | 100056166 | 100058046           |
| ENSG00000238120 | 4.322773689 | 2.242360793 | antisense        |   | 22 | 46000312  | 46001501            |
| ENSG00000238121 | 0           | 0.390640832 | lincRNA          |   | 13 | 30914407  | 30951282 LINC00426  |
| ENSG00000238123 | 1.799000381 | 3.183544561 | antisense        | X |    | 38660821  | 38663136 MID1P1-AS1 |
| ENSG00000238133 | 2.671945279 | 1.802319292 | antisense        |   | 2  | 174031174 | 174146764 MLK7-AS1  |
| ENSG00000238140 | 0           | 0.390640832 | antisense        |   | 1  | 51927393  | 51929088            |
| ENSG00000238141 | 0           | 0.390640832 | antisense        |   | 21 | 40687633  | 40695144 BRWD1-AS1  |
| ENSG00000238142 | 0.499066092 | 0.697730409 | lincRNA          |   | 1  | 17215033  | 17216144            |
| ENSG00000238150 | 0.869158192 | 1.16600992  | pseudogene       |   | 19 | 54278853  | 54279136            |
| ENSG00000238151 | 1.16343121  | 1.16600992  | pseudogene       |   | 20 | 29637799  | 29638060 MLLT10P1   |
| ENSG00000238153 | 2.671945279 | 1.667587519 | pseudogene       |   | 22 | 35560297  | 35561340            |
| ENSG00000238157 | 1.407729925 | 3.279072565 | lincRNA          |   | 20 | 25844905  | 25848315            |
| ENSG00000238160 | 1.16343121  | 0.950786998 | antisense        |   | 5  | 131755108 | 131762406           |
| ENSG00000238164 | 3.077135474 | 3.714580548 | processed_transc |   | 1  | 2481359   | 2488470             |
| ENSG00000238165 | 0.499066092 | 0.697730409 | pseudogene       |   | 2  | 51056580  | 51056816            |
| ENSG00000238166 | 0           | 0.390640832 | pseudogene       |   | 15 | 79044449  | 79045715            |
| ENSG00000238167 | 0.869158192 | 0.950786998 | antisense        |   | 17 | 76311810  | 76343879            |
| ENSG00000238168 | 0.499066092 | 0.390640832 | pseudogene       |   | 12 | 112019179 | 112019607           |
| ENSG00000238171 | 0.499066092 | 0           | lincRNA          |   | 2  | 181940778 | 181970695           |
| ENSG00000238172 | 1.616589159 | 1.667587519 | pseudogene       |   | 9  | 102879037 | 102879933           |
| ENSG00000238173 | 0           | 0.390640832 | pseudogene       |   | 1  | 11293020  | 11293169 RPL39P6    |
| ENSG00000238178 | 1.16343121  | 0.390640832 | antisense        | X |    | 16171064  | 16188992            |
| ENSG00000238179 | 0.869158192 | 0.390640832 | processed_transc |   | 13 | 24993688  | 24995180 PARP4-AS1  |
| ENSG00000238180 | 0.499066092 | 0           | pseudogene       |   | 2  | 128975162 | 128975646           |
| ENSG00000238181 | 1.16343121  | 0.390640832 | pseudogene       |   | 9  | 123482951 | 123484241           |
| ENSG00000238184 | 1.799000381 | 2.242360793 | processed_transc |   | 11 | 2349979   | 2399222             |
| ENSG00000238186 | 2.35979773  | 2.579085888 | antisense        |   | 1  | 40981426  | 40982846            |
| ENSG00000238188 | 0           | 1.16600992  | pseudogene       | X |    | 129779697 | 129780299           |
| ENSG00000238195 | 1.799000381 | 1.925536307 | lincRNA          |   | 22 | 27600173  | 27601088            |
| ENSG00000238197 | 3.554067925 | 2.971122874 | processed_transc |   | 21 | 34100426  | 34115433 GCFC1-AS1  |
| ENSG00000238198 | 2.762599152 | 2.721932731 | processed_transc |   | 1  | 113554309 | 113615727           |
| ENSG00000238199 | 1.407729925 | 0.950786998 | pseudogene       |   | 1  | 11338673  | 11339408            |
| ENSG00000238205 | 0           | 0.390640832 | pseudogene       | X |    | 40482836  | 40483112            |
| ENSG00000238206 | 3.830412367 | 4.448594745 | antisense        |   | 4  | 39549456  | 39551432            |
| ENSG00000238221 | 1.407729925 | 0.390640832 | antisense        |   | 6  | 7276264   | 7299105             |
| ENSG00000238222 | 1.16343121  | 2.144285137 | pseudogene       | X |    | 40693738  | 40695258 MKRN4P     |
| ENSG00000238227 | 9.588218042 | 9.224178134 | protein_coding   |   | 9  | 139006427 | 139010731 C9orf69   |
| ENSG00000238228 | 2.10647801  | 1.667587519 | pseudogene       |   | 7  | 97576299  | 97577310            |
| ENSG00000238231 | 0.499066092 | 1.16600992  | pseudogene       |   | 1  | 28316647  | 28317035            |
| ENSG00000238240 | 1.16343121  | 2.420525079 | pseudogene       |   | 1  | 2283095   | 2283298             |
| ENSG00000238244 | 0.499066092 | 0.390640832 | protein_coding   |   | 15 | 90890819  | 90892669 GABARAPL3  |
| ENSG00000238245 | 0.869158192 | 1.16600992  | pseudogene       |   | 9  | 66513032  | 66514283 MYO5BP2    |
| ENSG00000238247 | 0           | 0.950786998 | pseudogene       | X |    | 27536001  | 27537876            |
| ENSG00000238249 | 0.499066092 | 0.950786998 | pseudogene       |   | 1  | 8953468   | 8954210 HMGN2P17    |
| ENSG00000238251 | 1.616589159 | 1.667587519 | pseudogene       |   | 9  | 99169566  | 99170075            |
| ENSG00000238258 | 0.869158192 | 2.039052734 | antisense        |   | 10 | 33500205  | 33502732            |
| ENSG00000238259 | 0.869158192 | 0           | pseudogene       |   | 2  | 169088431 | 169088730           |
| ENSG00000238260 | 0           | 0.950786998 | antisense        |   | 1  | 3539754   | 3541307             |
| ENSG00000238261 | 1.960915222 | 1.802319292 | lincRNA          |   | 1  | 143377281 | 143404415           |
| ENSG00000238266 | 4.942865586 | 2.334191469 | processed_transc |   | 10 | 6821560   | 6884868             |
| ENSG00000238268 | 0           | 0.390640832 | antisense        |   | 9  | 139869546 | 139871433           |
| ENSG00000238269 | 0.869158192 | 0.697730409 | protein_coding   | X |    | 55101496  | 55119260 PAGE2B     |
| ENSG00000238271 | 2.471521042 | 2.144285137 | pseudogene       |   | 9  | 21455483  | 21456044 IFNWP19    |
| ENSG00000238273 | 1.616589159 | 0.390640832 | antisense        |   | 2  | 105992323 | 105995298           |
| ENSG00000238278 | 3.871730003 | 3.64455972  | pseudogene       |   | 3  | 75464221  | 75471294            |
| ENSG00000238279 | 4.517578978 | 4.585695337 | antisense        |   | 1  | 153506079 | 153507591           |
| ENSG00000238280 | 0           | 0.390640832 | antisense        |   | 10 | 64553322  | 64565647            |
| ENSG00000238286 | 0.499066092 | 1.16600992  | pseudogene       |   | 13 | 21181407  | 21182270 SLC35E1P1  |
| ENSG00000238287 | 1.960915222 | 2.788380093 | antisense        |   | 1  | 40958829  | 40974333            |
| ENSG00000238288 | 0.499066092 | 1.16600992  | pseudogene       |   | 9  | 94872450  | 94872796            |
| ENSG00000238290 | 1.799000381 | 1.353254395 | processed_transc |   | 1  | 8086798   | 8182762             |
| ENSG00000238298 | 1.16343121  | 1.925536307 | snoRNA           |   | 9  | 133325241 | 133325342           |
| ENSG00000238304 | 0           | 0.390640832 | snRNA            |   | 11 | 3802625   | 3802686 RNU7-50P    |

|                 |             |             |          |    |           |                    |
|-----------------|-------------|-------------|----------|----|-----------|--------------------|
| ENSG00000238311 | 0           | 0.390640832 | snoRNA   | 15 | 65989171  | 65989274           |
| ENSG00000238317 | 1.16343121  | 0.950786998 | snoRNA   | 2  | 203157772 | 203157859 SNORD11  |
| ENSG00000238318 | 0.499066092 | 0           | snoRNA   | 4  | 71677963  | 71678063           |
| ENSG00000238319 | 0.499066092 | 0           | snoRNA   | 4  | 184195614 | 184195717          |
| ENSG00000238324 | 0           | 0.390640832 | misc_RNA | 7  | 102497897 | 102498202          |
| ENSG00000238326 | 0           | 0.390640832 | snoRNA   | 5  | 55296346  | 55296449           |
| ENSG00000238329 | 0           | 0.390640832 | snoRNA   | 16 | 18881488  | 18881591           |
| ENSG00000238334 | 0.499066092 | 2.242360793 | snoRNA   | 5  | 68471651  | 68471754           |
| ENSG00000238336 | 2.238690726 | 2.851901313 | snoRNA   | 7  | 129959119 | 129959222          |
| ENSG00000238339 | 0.499066092 | 0.390640832 | snoRNA   | 2  | 179990263 | 179990364          |
| ENSG00000238342 | 0           | 0.390640832 | snoRNA   | 15 | 33187401  | 33187502           |
| ENSG00000238344 | 0.499066092 | 0.390640832 | snoRNA   | 14 | 20794609  | 20794685 SNORD126  |
| ENSG00000238349 | 1.407729925 | 2.334191469 | snoRNA   | 19 | 11549997  | 11550096           |
| ENSG00000238350 | 0.499066092 | 0           | snoRNA   | 3  | 47507839  | 47507938           |
| ENSG00000238358 | 0           | 0.697730409 | lincRNA  | 7  | 89748613  | 89752204           |
| ENSG00000238359 | 0           | 0.390640832 | snoRNA   | 3  | 171411001 | 171411104          |
| ENSG00000238363 | 1.960915222 | 1.353254395 | snoRNA   | 5  | 111497182 | 111497314 SNORA13  |
| ENSG00000238365 | 0           | 0.697730409 | snRNA    | 1  | 154311219 | 154311278 RNU7-57P |
| ENSG00000238366 | 1.16343121  | 0           | misc_RNA | 10 | 6287694   | 6287794            |
| ENSG00000238368 | 0.499066092 | 0.697730409 | snoRNA   | 2  | 120674894 | 120675000          |
| ENSG00000238369 | 2.10647801  | 1.667587519 | snoRNA   | 5  | 149408912 | 149409015          |
| ENSG00000238390 | 1.16343121  | 0.697730409 | snoRNA   | 21 | 33036619  | 33036795           |
| ENSG00000238394 | 0.499066092 | 0.390640832 | snoRNA   | 7  | 5525026   | 5525132            |
| ENSG00000238403 | 0.869158192 | 0.697730409 | snoRNA   | 17 | 80540381  | 80540476           |
| ENSG00000238419 | 0           | 0.697730409 | snRNA    | 17 | 45336724  | 45336786           |
| ENSG00000238420 | 0           | 0.390640832 | snRNA    | 6  | 108251292 | 108251386          |
| ENSG00000238423 | 0           | 0.950786998 | snoRNA   | 17 | 27047568  | 27047634 SNORD42B  |
| ENSG00000238437 | 0           | 0.950786998 | snoRNA   | 11 | 93530379  | 93530479           |
| ENSG00000238446 | 0           | 0.390640832 | snRNA    | 10 | 73604492  | 73604551 RNU7-38P  |
| ENSG00000238460 | 0.499066092 | 0           | miRNA    | 8  | 12435514  | 12435661           |
| ENSG00000238462 | 0           | 0.390640832 | snoRNA   | 2  | 9672371   | 9672474            |
| ENSG00000238465 | 0           | 1.802319292 | snoRNA   | 2  | 70139827  | 70139931           |
| ENSG00000238480 | 0.499066092 | 0           | snoRNA   | 3  | 122469219 | 122469322          |
| ENSG00000238484 | 0.499066092 | 0           | snoRNA   | 6  | 34660557  | 34660660           |
| ENSG00000238498 | 0.499066092 | 0.697730409 | snoRNA   | 22 | 42472062  | 42472165           |
| ENSG00000238505 | 1.407729925 | 0.390640832 | snoRNA   | 2  | 203156058 | 203156141 SNORD11B |
| ENSG00000238511 | 0.499066092 | 1.925536307 | snoRNA   | 1  | 153726600 | 153726703          |
| ENSG00000238513 | 0           | 0.390640832 | snoRNA   | 15 | 56247899  | 56248002           |
| ENSG00000238516 | 0.499066092 | 0           | misc_RNA | 17 | 27161740  | 27161840           |
| ENSG00000238526 | 0           | 0.390640832 | snoRNA   | 1  | 150234093 | 150234196          |
| ENSG00000238528 | 1.616589159 | 1.353254395 | snoRNA   | 12 | 66739499  | 66739602           |
| ENSG00000238531 | 0.499066092 | 0.697730409 | snoRNA   | 19 | 10220433  | 10220511 SNORD105B |
| ENSG00000238532 | 0           | 0.390640832 | miRNA    | 1  | 117134728 | 117134821          |
| ENSG00000238534 | 1.16343121  | 0           | misc_RNA | 7  | 6214842   | 6214935            |
| ENSG00000238541 | 0           | 0.697730409 | snoRNA   | 4  | 57972409  | 57972511           |
| ENSG00000238544 | 0           | 0.697730409 | snoRNA   | 16 | 50386100  | 50386203           |
| ENSG00000238549 | 0.869158192 | 0.390640832 | snoRNA   | 20 | 34304393  | 34304492           |
| ENSG00000238553 | 0           | 0.390640832 | miRNA    | 4  | 103487032 | 103487124          |
| ENSG00000238574 | 0           | 0.390640832 | miRNA    | 2  | 101752517 | 101752580          |
| ENSG00000238583 | 0.869158192 | 1.518964905 | snoRNA   | 15 | 45783782  | 45783885           |
| ENSG00000238585 | 0           | 0.390640832 | misc_RNA | 4  | 56367762  | 56367875           |
| ENSG00000238597 | 1.799000381 | 2.242360793 | snoRNA   | 17 | 27050700  | 27050771 SNORD4B   |
| ENSG00000238608 | 0           | 0.390640832 | snoRNA   | 9  | 86067188  | 86067290           |
| ENSG00000238610 | 0           | 0.697730409 | snRNA    | 6  | 27865282  | 27865344 RNU7-26P  |
| ENSG00000238621 | 1.16343121  | 2.242360793 | miRNA    | 6  | 26988114  | 26988226 TRNAI2    |
| ENSG00000238641 | 0           | 0.390640832 | miRNA    | 2  | 190749490 | 190749579          |
| ENSG00000238645 | 0.499066092 | 0           | snoRNA   | 16 | 53368474  | 53368576           |
| ENSG00000238646 | 0           | 0.390640832 | snoRNA   | 3  | 32214148  | 32214252           |
| ENSG00000238649 | 1.960915222 | 1.353254395 | snoRNA   | 17 | 27050447  | 27050510 SNORD42A  |
| ENSG00000238657 | 0.499066092 | 0           | snoRNA   | 9  | 135968439 | 135968538          |
| ENSG00000238663 | 0.499066092 | 0           | snoRNA   | 2  | 216167489 | 216167587          |
| ENSG00000238673 | 0.499066092 | 0.390640832 | snoRNA   | 7  | 56168352  | 56168445           |
| ENSG00000238678 | 0           | 1.16600992  | snoRNA   | 15 | 25287121  | 25287187 SNORD109A |

|                 |             |             |          |    |           |                    |
|-----------------|-------------|-------------|----------|----|-----------|--------------------|
| ENSG00000238679 | 0           | 0.390640832 | snoRNA   | 1  | 119801664 | 119801764          |
| ENSG00000238683 | 0           | 0.390640832 | snoRNA   | 16 | 69742475  | 69742578           |
| ENSG00000238686 | 0.499066092 | 0.390640832 | snoRNA   | 11 | 3713273   | 3713375            |
| ENSG00000238711 | 0           | 0.697730409 | misc_RNA | 1  | 151411476 | 151411571 RNY4P25  |
| ENSG00000238713 | 0           | 0.697730409 | misc_RNA | 4  | 146070689 | 146070801          |
| ENSG00000238717 | 0           | 0.390640832 | snoRNA   | 5  | 56152975  | 56153078           |
| ENSG00000238728 | 0           | 0.390640832 | miRNA    | 16 | 15104178  | 15104254 MIR1972-1 |
| ENSG00000238732 | 1.407729925 | 0.390640832 | snoRNA   | 10 | 43305675  | 43305778           |
| ENSG00000238736 | 0.499066092 | 0           | snoRNA   | 2  | 219193303 | 219193403          |
| ENSG00000238739 | 0           | 0.390640832 | snoRNA   | 7  | 90236318  | 90236422           |
| ENSG00000238741 | 0           | 0.950786998 | snoRNA   | 3  | 160232695 | 160233024 SCARNA7  |
| ENSG00000238744 | 0           | 0.390640832 | snoRNA   | 4  | 169231843 | 169231946          |
| ENSG00000238755 | 0.499066092 | 0           | lincRNA  | 3  | 153102723 | 153105157          |
| ENSG00000238756 | 0           | 0.390640832 | snoRNA   | 2  | 54066862  | 54066966           |
| ENSG00000238770 | 0           | 0.390640832 | snoRNA   | 2  | 202946598 | 202946701          |
| ENSG00000238774 | 0.499066092 | 0.390640832 | miRNA    | 16 | 11442584  | 11442653           |
| ENSG00000238775 | 0.499066092 | 0.390640832 | snoRNA   | 6  | 111284669 | 111284772          |
| ENSG00000238781 | 0           | 0.390640832 | snoRNA   | 7  | 4729111   | 4729214            |
| ENSG00000238793 | 1.960915222 | 1.518964905 | snoRNA   | 17 | 38183795  | 38183898 SNORD124  |
| ENSG00000238795 | 2.35979773  | 3.027231696 | snoRNA   | 12 | 7076500   | 7076769 SCARNA12   |
| ENSG00000238805 | 0           | 0.390640832 | snoRNA   | 1  | 155385349 | 155385453          |
| ENSG00000238806 | 0.499066092 | 0.390640832 | snoRNA   | 17 | 15141102  | 15141200           |
| ENSG00000238807 | 0.499066092 | 0           | snoRNA   | 17 | 4017902   | 4018004            |
| ENSG00000238818 | 0           | 0.390640832 | snoRNA   | 1  | 16237392  | 16237492           |
| ENSG00000238821 | 0.499066092 | 0           | snoRNA   | 1  | 28843988  | 28844087           |
| ENSG00000238824 | 1.16343121  | 0.697730409 | snoRNA   | 9  | 140017961 | 140018060          |
| ENSG00000238829 | 0.499066092 | 0.697730409 | snRNA    | 2  | 202006627 | 202006689 RNU7-45P |
| ENSG00000238832 | 1.16343121  | 1.353254395 | snoRNA   | 7  | 107243808 | 107243952          |
| ENSG00000238834 | 0           | 0.950786998 | snoRNA   | 16 | 47154830  | 47154932           |
| ENSG00000238835 | 0.499066092 | 0           | snoRNA   | 5  | 82360023  | 82360156 SCARNA18  |
| ENSG00000238840 | 0.499066092 | 0.697730409 | snoRNA   | 10 | 5004628   | 5004760            |
| ENSG00000238841 | 0           | 0.390640832 | snoRNA   | 7  | 66255341  | 66255451           |
| ENSG00000238843 | 0           | 0.697730409 | snoRNA   | 1  | 156499122 | 156499221          |
| ENSG00000238857 | 0.499066092 | 0           | snoRNA   | 7  | 2590504   | 2590599            |
| ENSG00000238868 | 1.407729925 | 1.353254395 | snoRNA   | 7  | 140075363 | 140075466          |
| ENSG00000238878 | 0           | 0.390640832 | snoRNA   | 13 | 22101939  | 22102039           |
| ENSG00000238881 | 3.211941663 | 4.547834947 | snoRNA   | 1  | 109642815 | 109643234 SCARNA2  |
| ENSG00000238892 | 0           | 0.950786998 | snoRNA   | 11 | 66988379  | 66988487           |
| ENSG00000238910 | 1.16343121  | 1.16600992  | snoRNA   | 22 | 32349391  | 32349493           |
| ENSG00000238913 | 0           | 0.697730409 | snRNA    | 5  | 73123837  | 73123898           |
| ENSG00000238917 | 5.637181576 | 5.620622115 | snoRNA   | 17 | 7480129   | 7480270 SNORD10    |
| ENSG00000238922 | 0.499066092 | 0           | snoRNA   | 7  | 110749324 | 110749413          |
| ENSG00000238924 | 2.35979773  | 0.390640832 | snRNA    | 10 | 1088233   | 1088295            |
| ENSG00000238937 | 0           | 0.390640832 | miRNA    | 1  | 142656014 | 142656096          |
| ENSG00000238946 | 0           | 0.390640832 | snoRNA   | 17 | 1519486   | 1519589            |
| ENSG00000238947 | 0.499066092 | 0.697730409 | snoRNA   | 17 | 80099539  | 80099649           |
| ENSG00000238961 | 0           | 0.697730409 | snoRNA   | 5  | 76376259  | 76376396 SNORA47   |
| ENSG00000238964 | 0           | 0.390640832 | snRNA    | 16 | 14737645  | 14737706           |
| ENSG00000238974 | 0           | 0.390640832 | snoRNA   | 6  | 108564659 | 108564762          |
| ENSG00000238975 | 1.616589159 | 1.667587519 | snoRNA   | 1  | 113195210 | 113195310          |
| ENSG00000238994 | 0           | 0.390640832 | snoRNA   | 9  | 140315596 | 140315690          |
| ENSG00000238995 | 0.499066092 | 0           | snoRNA   | 11 | 82554927  | 82555027           |
| ENSG00000239005 | 0.499066092 | 0.697730409 | snoRNA   | 4  | 140357522 | 140357648          |
| ENSG00000239014 | 1.799000381 | 1.518964905 | snoRNA   | 15 | 25232072  | 25232142 SNORD108  |
| ENSG00000239024 | 0.499066092 | 0           | snoRNA   | 17 | 2558973   | 2559076            |
| ENSG00000239028 | 1.16343121  | 0           | miRNA    | 9  | 69821760  | 69821841           |
| ENSG00000239040 | 2.35979773  | 1.518964905 | misc_RNA | 4  | 56278803  | 56278905           |
| ENSG00000239043 | 0           | 0.697730409 | snoRNA   | 14 | 45580086  | 45580171 SNORD127  |
| ENSG00000239055 | 0.499066092 | 0.390640832 | snoRNA   | 9  | 131511637 | 131511740          |
| ENSG00000239063 | 0           | 0.390640832 | snoRNA   | 1  | 52877114  | 52877194           |
| ENSG00000239064 | 0.499066092 | 0.390640832 | snoRNA   | 2  | 71157470  | 71157545           |
| ENSG00000239079 | 0           | 0.390640832 | snoRNA   | 11 | 122596916 | 122597019          |
| ENSG00000239082 | 0.499066092 | 0           | snRNA    | 12 | 122346009 | 122346069          |

|                 |             |             |                  |    |           |                      |
|-----------------|-------------|-------------|------------------|----|-----------|----------------------|
| ENSG00000239091 | 0.499066092 | 0           | snoRNA           | 10 | 103131609 | 103131709            |
| ENSG00000239093 | 1.407729925 | 1.667587519 | snoRNA           | 3  | 187141103 | 187141207            |
| ENSG00000239096 | 0.869158192 | 0.697730409 | snoRNA           | 3  | 179332563 | 179332666            |
| ENSG00000239100 | 0.499066092 | 0.390640832 | snoRNA           | 15 | 58892331  | 58892434             |
| ENSG00000239109 | 0           | 0.390640832 | miRNA            | 20 | 30875957  | 30876036             |
| ENSG00000239112 | 0           | 0.390640832 | snoRNA           | 5  | 9548948   | 9549017 SNORD123     |
| ENSG00000239121 | 0.499066092 | 0           | snoRNA           | 16 | 58652579  | 58652668             |
| ENSG00000239122 | 0.499066092 | 0.697730409 | snRNA            | 3  | 195655460 | 195655646            |
| ENSG00000239123 | 0.499066092 | 0           | snoRNA           | 7  | 138167225 | 138167328            |
| ENSG00000239127 | 2.762599152 | 2.721932731 | snoRNA           | 22 | 29729152  | 29729247 SNORD125    |
| ENSG00000239133 | 0.869158192 | 0.697730409 | snoRNA           | 7  | 99011601  | 99011701             |
| ENSG00000239135 | 0.499066092 | 1.16600992  | snoRNA           | 17 | 48322257  | 48322365             |
| ENSG00000239149 | 0.499066092 | 0           | snoRNA           | 1  | 12567300  | 12567451 SNORA59A    |
| ENSG00000239157 | 0.869158192 | 0.390640832 | snoRNA           | 20 | 48556833  | 48556937             |
| ENSG00000239171 | 0           | 0.390640832 | snoRNA           | 21 | 30761707  | 30761810             |
| ENSG00000239180 | 0           | 0.390640832 | misc_RNA         | 9  | 72926523  | 72926617             |
| ENSG00000239182 | 0.499066092 | 0           | snoRNA           | X  | 117872018 | 117872145            |
| ENSG00000239183 | 0.499066092 | 1.16600992  | snoRNA           | 9  | 95054743  | 95054875 SNORA84     |
| ENSG00000239198 | 0.499066092 | 0.697730409 | pseudogene       | 8  | 28157200  | 28158083             |
| ENSG00000239202 | 0           | 0.390640832 | scRNA_pseudoge   | 2  | 232510709 | 232510984            |
| ENSG00000239207 | 0           | 0.697730409 | pseudogene       | 3  | 138496674 | 138497652 GAPDHP39   |
| ENSG00000239212 | 0           | 0.390640832 | pseudogene       | 3  | 155375549 | 155376401 RPL6P7     |
| ENSG00000239213 | 4.734682531 | 4.976162367 | antisense        | 3  | 136560568 | 136580896            |
| ENSG00000239218 | 0.869158192 | 0.950786998 | pseudogene       | 8  | 38291865  | 38293182 RPS20P22    |
| ENSG00000239221 | 0           | 0.390640832 | scRNA_pseudoge   | 17 | 16095146  | 16095461             |
| ENSG00000239224 | 1.16343121  | 0.950786998 | scRNA_pseudoge   | 14 | 103049225 | 103049509            |
| ENSG00000239227 | 0.869158192 | 0.697730409 | pseudogene       | 3  | 166579732 | 166579898            |
| ENSG00000239235 | 3.744048221 | 3.96493948  | processed_transc | 2  | 54197975  | 54307601             |
| ENSG00000239238 | 0           | 0.390640832 | pseudogene       | 3  | 167606202 | 167606503 MEMO1P3    |
| ENSG00000239241 | 0           | 0.390640832 | rRNA_pseudogen   | 6  | 74185643  | 74185803             |
| ENSG00000239246 | 1.616589159 | 1.16600992  | pseudogene       | 17 | 60593682  | 60594128             |
| ENSG00000239247 | 0           | 0.697730409 | scRNA_pseudoge   | 4  | 2317924   | 2318232              |
| ENSG00000239248 | 0.499066092 | 0           | rRNA_pseudogen   | 15 | 56724896  | 56724968             |
| ENSG00000239253 | 0           | 0.390640832 | pseudogene       | 19 | 34512564  | 34512800             |
| ENSG00000239254 | 1.616589159 | 1.667587519 | pseudogene       | 7  | 138857262 | 138859012            |
| ENSG00000239256 | 0           | 0.390640832 | pseudogene       | 17 | 27667500  | 27667840             |
| ENSG00000239264 | 6.62865285  | 6.811590016 | protein_coding   | 6  | 7881483   | 8026646 TXNDC5       |
| ENSG00000239265 | 0           | 0.390640832 | antisense        | 3  | 150570271 | 150798513 CLRN1-AS1  |
| ENSG00000239266 | 0           | 0.390640832 | snoRNA_pseudog   | 22 | 21300933  | 21301002             |
| ENSG00000239269 | 0           | 0.390640832 | pseudogene       | 14 | 95192625  | 95193512 RPSAP4      |
| ENSG00000239272 | 1.799000381 | 1.16600992  | pseudogene       | 14 | 78149545  | 78150332             |
| ENSG00000239278 | 0           | 0.697730409 | Mt_tRNA_pseudc   | 2  | 156120525 | 156120593            |
| ENSG00000239280 | 1.16343121  | 1.667587519 | pseudogene       | 3  | 113459670 | 113460101            |
| ENSG00000239282 | 3.871730003 | 3.714580548 | protein_coding   | 22 | 30681106  | 30685616 GATSL3      |
| ENSG00000239283 | 0           | 0.950786998 | Mt_tRNA_pseudc   | 16 | 3417648   | 3417717              |
| ENSG00000239291 | 0.499066092 | 1.16600992  | pseudogene       | 17 | 45236557  | 45237359             |
| ENSG00000239298 | 0.499066092 | 1.353254395 | processed_transc | 1  | 1335799   | 1337426              |
| ENSG00000239300 | 1.407729925 | 1.353254395 | antisense        | 2  | 9645574   | 9652541              |
| ENSG00000239302 | 0.869158192 | 0.950786998 | scRNA_pseudoge   | 2  | 39715331  | 39715584             |
| ENSG00000239305 | 6.984620223 | 7.644032061 | protein_coding   | 2  | 86830516  | 86850989 RNF103      |
| ENSG00000239306 | 10.1097262  | 10.05263426 | protein_coding   | 11 | 66384053  | 66406124 RBM14       |
| ENSG00000239317 | 0           | 0.950786998 | pseudogene       | 5  | 145518334 | 145518571            |
| ENSG00000239322 | 3.393122761 | 3.608232228 | antisense        | 2  | 71168947  | 71175740             |
| ENSG00000239325 | 0.499066092 | 0.697730409 | rRNA_pseudogen   | 7  | 148481397 | 148481485            |
| ENSG00000239332 | 3.502389126 | 2.242360793 | protein_coding   | 2  | 47043836  | 47086146             |
| ENSG00000239335 | 1.960915222 | 1.802319292 | antisense        | 12 | 66524531  | 66528229             |
| ENSG00000239344 | 0.869158192 | 0           | pseudogene       | 8  | 104780509 | 104781257            |
| ENSG00000239345 | 0.869158192 | 0.390640832 | pseudogene       | X  | 100110392 | 100111369 HNRNPA1P26 |
| ENSG00000239351 | 0.869158192 | 0.390640832 | pseudogene       | 3  | 149656784 | 149657586            |
| ENSG00000239352 | 0.499066092 | 0.697730409 | processed_transc | 19 | 36195429  | 36205962             |
| ENSG00000239353 | 2.762599152 | 1.802319292 | processed_transc | 9  | 132264269 | 132275965            |
| ENSG00000239365 | 0           | 0.950786998 | pseudogene       | 14 | 105297175 | 105297508 RPS26P49   |
| ENSG00000239366 | 0           | 1.16600992  | pseudogene       | 18 | 21252214  | 21252712             |

|                 |             |             |                    |    |           |                      |
|-----------------|-------------|-------------|--------------------|----|-----------|----------------------|
| ENSG00000239367 | 0           | 0.390640832 | scRNA_pseudoge     | 19 | 1570575   | 1570859              |
| ENSG00000239368 | 0.869158192 | 0.697730409 | lincRNA            | 1  | 164405    | 173864               |
| ENSG00000239373 | 0           | 0.390640832 | scRNA_pseudoge     | 1  | 171461553 | 171461842            |
| ENSG00000239374 | 0.499066092 | 0           | pseudogene         | 12 | 117193200 | 117193679            |
| ENSG00000239377 | 2.57521082  | 2.039052734 | antisense          | 7  | 150076943 | 150080973            |
| ENSG00000239379 | 1.16343121  | 0.390640832 | scRNA_pseudoge     | 4  | 73969561  | 73969647             |
| ENSG00000239382 | 5.036678094 | 4.990346085 | protein_coding     | 19 | 36500023  | 36505145 ALKBH6      |
| ENSG00000239388 | 3.211941663 | 2.721932731 | protein_coding     | 3  | 57302375  | 57326710 ASB14       |
| ENSG00000239389 | 4.131913373 | 3.453019579 | protein_coding     | 5  | 140261793 | 140391929 PCDHA13    |
| ENSG00000239392 | 0           | 1.518964905 | pseudogene         | 9  | 34133161  | 34134694             |
| ENSG00000239393 | 0.869158192 | 0.950786998 | pseudogene         | 5  | 176773074 | 176773427            |
| ENSG00000239398 | 0           | 0.697730409 | scRNA_pseudoge     | 18 | 57640146  | 57640439             |
| ENSG00000239405 | 3.004694206 | 2.652276565 | pseudogene         | 3  | 128256863 | 128257474 TMED10P2   |
| ENSG00000239407 | 3.554067925 | 4.319727133 | processed_transc X |    | 102139342 | 102161086            |
| ENSG00000239413 | 2.10647801  | 2.334191469 | pseudogene         | 12 | 101818219 | 101818469 RPS27P23   |
| ENSG00000239415 | 4.689181911 | 4.202780776 | processed_transc   | 21 | 47671463  | 47674047             |
| ENSG00000239419 | 1.407729925 | 1.16600992  | scRNA_pseudoge     | 7  | 142987708 | 142987999            |
| ENSG00000239433 | 0           | 0.697730409 | Mt_tRNA_pseudc     | 16 | 3419882   | 3419949              |
| ENSG00000239437 | 2.10647801  | 2.144285137 | scRNA_pseudoge     | 3  | 129310192 | 129310407            |
| ENSG00000239445 | 0           | 1.518964905 | antisense          | 3  | 98433174  | 98451495 ST3GAL6-AS1 |
| ENSG00000239447 | 0           | 0.697730409 | rRNA_pseudogen     | 15 | 59203645  | 59203752             |
| ENSG00000239448 | 0.499066092 | 0           | rRNA_pseudogen     | 2  | 232110047 | 232110189            |
| ENSG00000239455 | 1.16343121  | 0.697730409 | pseudogene         | 3  | 106823758 | 106825847            |
| ENSG00000239462 | 1.16343121  | 0.950786998 | antisense          | 3  | 98621268  | 98737406             |
| ENSG00000239465 | 0           | 0.697730409 | pseudogene         | 15 | 64923308  | 64924113             |
| ENSG00000239466 | 0.869158192 | 0           | scRNA_pseudoge     | 4  | 85608879  | 85609168             |
| ENSG00000239467 | 4.568725997 | 5.32851069  | lincRNA            | 2  | 171627623 | 171634658            |
| ENSG00000239472 | 0.499066092 | 0.697730409 | scRNA_pseudoge     | 6  | 5918790   | 5919077              |
| ENSG00000239473 | 0           | 0.390640832 | pseudogene         | 12 | 80422673  | 80423411             |
| ENSG00000239474 | 1.16343121  | 1.925536307 | protein_coding     | 2  | 170366212 | 170382772 KBTBD10    |
| ENSG00000239480 | 0           | 0.950786998 | antisense          | 7  | 102067265 | 102075227            |
| ENSG00000239482 | 0.869158192 | 0.390640832 | processed_transc   | 3  | 112021325 | 112051638            |
| ENSG00000239483 | 0           | 1.353254395 | pseudogene         | 3  | 128517684 | 128518044 RPS15AP16  |
| ENSG00000239486 | 1.16343121  | 1.518964905 | pseudogene         | 7  | 102020912 | 102023184            |
| ENSG00000239494 | 0.499066092 | 0.390640832 | scRNA_pseudoge     | 1  | 169828902 | 169829193            |
| ENSG00000239498 | 0.499066092 | 0.697730409 | lincRNA            | 2  | 220970377 | 221315499            |
| ENSG00000239501 | 0           | 0.390640832 | processed_transc   | 13 | 21834168  | 21867568             |
| ENSG00000239503 | 1.407729925 | 0.950786998 | pseudogene         | 3  | 128467381 | 128468332 MARK2P8    |
| ENSG00000239507 | 0           | 0.390640832 | scRNA_pseudoge     | 17 | 62867623  | 62867898             |
| ENSG00000239510 | 1.16343121  | 0           | pseudogene         | 14 | 59030864  | 59031334 RPL9P5      |
| ENSG00000239511 | 0.499066092 | 0.390640832 | protein_coding     | 22 | 21477050  | 21482352 POM121L7    |
| ENSG00000239517 | 0           | 1.16600992  | pseudogene         | 5  | 74227487  | 74227642             |
| ENSG00000239520 | 1.16343121  | 0.697730409 | pseudogene         | 17 | 34046907  | 34047461 RPL17P42    |
| ENSG00000239521 | 4.642199401 | 4.888000647 | pseudogene         | 7  | 99798276  | 99869837             |
| ENSG00000239523 | 3.989024711 | 4.17820932  | processed_transc   | 3  | 123304389 | 123363415 MYLK-AS1   |
| ENSG00000239524 | 0.499066092 | 1.16600992  | pseudogene         | 19 | 5277745   | 5278148              |
| ENSG00000239528 | 0.869158192 | 0           | pseudogene         | 5  | 115898258 | 115898626            |
| ENSG00000239530 | 0.869158192 | 0.697730409 | Mt_tRNA_pseudc     | 1  | 568069    | 568136               |
| ENSG00000239538 | 0           | 0.697730409 | snRNA_pseudoge     | 16 | 20834764  | 20834856             |
| ENSG00000239544 | 1.616589159 | 0.950786998 | pseudogene         | 14 | 73430353  | 73430716             |
| ENSG00000239545 | 0           | 0.697730409 | scRNA_pseudoge     | 4  | 140076301 | 140076597            |
| ENSG00000239553 | 0           | 0.697730409 | scRNA_pseudoge     | 11 | 66480191  | 66480480             |
| ENSG00000239556 | 1.960915222 | 1.518964905 | pseudogene         | 7  | 44024597  | 44029806             |
| ENSG00000239557 | 0.499066092 | 1.353254395 | pseudogene         | 3  | 52407668  | 52408898             |
| ENSG00000239559 | 1.407729925 | 0.950786998 | pseudogene         | 11 | 67450243  | 67450529 RPL37P2     |
| ENSG00000239560 | 0.499066092 | 0.390640832 | scRNA_pseudoge     | 1  | 44582770  | 44583063             |
| ENSG00000239561 | 0           | 0.390640832 | Mt_tRNA_pseudc     | 20 | 55936040  | 55936110             |
| ENSG00000239568 | 0           | 0.390640832 | pseudogene         | 3  | 72632521  | 72632686             |
| ENSG00000239569 | 4.062237333 | 4.42790041  | antisense          | 7  | 104653872 | 104654768            |
| ENSG00000239573 | 0.499066092 | 0.390640832 | scRNA_pseudoge     | 11 | 66934049  | 66934303             |
| ENSG00000239576 | 0           | 0.390640832 | pseudogene         | 3  | 49795916  | 49796089             |
| ENSG00000239577 | 0           | 0.390640832 | scRNA_pseudoge X   |    | 71418563  | 71418900             |
| ENSG00000239578 | 0.499066092 | 0.390640832 | scRNA_pseudoge     | 9  | 68685991  | 68686231             |

|                 |             |             |                  |    |           |                      |
|-----------------|-------------|-------------|------------------|----|-----------|----------------------|
| ENSG00000239581 | 0.499066092 | 0.697730409 | pseudogene       | 17 | 35497536  | 35498349             |
| ENSG00000239583 | 0.499066092 | 0           | scRNA_pseudoge   | 8  | 91100534  | 91100711             |
| ENSG00000239601 | 0           | 0.697730409 | scRNA_pseudoge   | 19 | 15418780  | 15419103             |
| ENSG00000239602 | 0.499066092 | 0.390640832 | pseudogene       | 5  | 145517318 | 145517944            |
| ENSG00000239605 | 0           | 0.697730409 | protein_coding   | 2  | 47314130  | 47382517 C2orf61     |
| ENSG00000239607 | 0.499066092 | 0.390640832 | scRNA_pseudoge   | 17 | 73037858  | 73038048             |
| ENSG00000239608 | 1.407729925 | 1.16600992  | antisense        | 3  | 127794653 | 127797899 RUVBL1-AS1 |
| ENSG00000239617 | 0.499066092 | 0.697730409 | pseudogene       | 12 | 49297201  | 49297596             |
| ENSG00000239620 | 4.409500985 | 3.714580548 | pseudogene       | 3  | 127002924 | 127003524            |
| ENSG00000239622 | 1.407729925 | 1.802319292 | pseudogene       | 7  | 25729200  | 25729579             |
| ENSG00000239626 | 0.869158192 | 0.390640832 | pseudogene       | 6  | 74000126  | 74000985             |
| ENSG00000239628 | 0.499066092 | 0           | lincRNA          | 3  | 170063466 | 170071749            |
| ENSG00000239631 | 0           | 0.390640832 | tRNA_pseudogen   | 8  | 99153462  | 99153530             |
| ENSG00000239636 | 1.960915222 | 1.925536307 | antisense        | 1  | 36035414  | 36043330             |
| ENSG00000239644 | 2.57521082  | 1.353254395 | pseudogene       | 1  | 17007487  | 17046652             |
| ENSG00000239647 | 1.16343121  | 0.950786998 | rRNA_pseudogen   | 10 | 50911035  | 50911419             |
| ENSG00000239648 | 0           | 0.390640832 | pseudogene       | 7  | 141503501 | 141504452 MTND1P3    |
| ENSG00000239650 | 0.499066092 | 1.802319292 | pseudogene       | 6  | 58246051  | 58256570             |
| ENSG00000239652 | 0.499066092 | 0.390640832 | processed_transc | 7  | 135392889 | 135414006            |
| ENSG00000239653 | 4.593635215 | 4.7279204   | antisense        | 3  | 63989698  | 63997824             |
| ENSG00000239660 | 1.407729925 | 0.390640832 | scRNA_pseudoge   | 19 | 54067350  | 54067697             |
| ENSG00000239665 | 5.575999561 | 5.47691899  | processed_transc | 10 | 13629006  | 13697929             |
| ENSG00000239666 | 0.869158192 | 1.353254395 | processed_transc | 10 | 99625988  | 99631337             |
| ENSG00000239670 | 2.57521082  | 3.279072565 | pseudogene       | 1  | 33452553  | 33453834             |
| ENSG00000239671 | 0.499066092 | 0.390640832 | pseudogene       | 17 | 40866317  | 40866661             |
| ENSG00000239672 | 8.565120083 | 8.891561392 | protein_coding   | 17 | 49230897  | 49239789 NME1        |
| ENSG00000239674 | 0.869158192 | 1.353254395 | processed_transc | 22 | 32528388  | 32539259             |
| ENSG00000239680 | 1.16343121  | 1.16600992  | pseudogene       | 19 | 6593338   | 6594069              |
| ENSG00000239686 | 0           | 0.390640832 | pseudogene       | 14 | 55749014  | 55749361             |
| ENSG00000239688 | 0.869158192 | 0           | scRNA_pseudoge   | 21 | 47955709  | 47956005             |
| ENSG00000239697 | 5.124761037 | 6.27612435  | protein_coding   | 17 | 7452208   | 7464925 TNFSF12      |
| ENSG00000239704 | 4.230497448 | 4.761389014 | protein_coding   | 17 | 15339332  | 15466899 CDRT4       |
| ENSG00000239705 | 0.499066092 | 0.950786998 | antisense        | 9  | 128003942 | 128019297            |
| ENSG00000239713 | 8.05038018  | 7.964516916 | protein_coding   | 22 | 39436924  | 39483748 APOBEC3G    |
| ENSG00000239719 | 0.869158192 | 0           | pseudogene       | 7  | 148888135 | 148888315            |
| ENSG00000239722 | 0           | 0.697730409 | pseudogene       | 7  | 128333504 | 128333978            |
| ENSG00000239726 | 0           | 0.697730409 | scRNA_pseudoge   | 11 | 118801921 | 118802186            |
| ENSG00000239731 | 0.499066092 | 0           | scRNA_pseudoge   | 10 | 32281016  | 32281295             |
| ENSG00000239732 | 0           | 0.390640832 | protein_coding   | 3  | 52255096  | 52260179 TLR9        |
| ENSG00000239735 | 5.107569429 | 4.810179682 | rRNA_pseudogen   | 4  | 7584187   | 7584364              |
| ENSG00000239739 | 0.499066092 | 0.390640832 | lincRNA          | 3  | 170458140 | 170459154            |
| ENSG00000239758 | 0           | 0.697730409 | rRNA_pseudogen   | 2  | 115695018 | 115695281            |
| ENSG00000239763 | 2.238690726 | 2.579085888 | pseudogene       | 16 | 74346507  | 74347288             |
| ENSG00000239765 | 0           | 0.390640832 | rRNA_pseudogen   | 15 | 45845717  | 45845802             |
| ENSG00000239770 | 0           | 0.950786998 | scRNA_pseudoge   | 5  | 90584749  | 90585004             |
| ENSG00000239776 | 13.24381165 | 13.13625942 | rRNA_pseudogen   | 12 | 127650453 | 127650987            |
| ENSG00000239777 | 0           | 1.518964905 | rRNA_pseudogen   | 8  | 46951571  | 46952175             |
| ENSG00000239779 | 5.207774174 | 5.583678991 | protein_coding   | 2  | 74685456  | 74688018 WBP1        |
| ENSG00000239781 | 0.499066092 | 0.697730409 | tRNA_pseudogen   | 1  | 149278785 | 149278857 TRNAE29P   |
| ENSG00000239789 | 6.103936836 | 5.901455548 | protein_coding   | 7  | 56019512  | 56024192 MRPS17      |
| ENSG00000239791 | 1.16343121  | 1.925536307 | antisense        | 16 | 30583571  | 30595181             |
| ENSG00000239795 | 0.499066092 | 0.390640832 | lincRNA          | 2  | 99385424  | 99388543             |
| ENSG00000239797 | 0           | 0.390640832 | pseudogene       | 3  | 145542044 | 145542526            |
| ENSG00000239799 | 0           | 0.390640832 | antisense        | 3  | 52857951  | 52859330 ITIH4-AS1   |
| ENSG00000239804 | 0.499066092 | 0.390640832 | pseudogene       | 3  | 125506731 | 125506989            |
| ENSG00000239809 | 0.869158192 | 1.353254395 | pseudogene       | 17 | 60459029  | 60459376             |
| ENSG00000239815 | 0.869158192 | 0.950786998 | lincRNA          | 7  | 128506633 | 128508898            |
| ENSG00000239820 | 0.499066092 | 0           | scRNA_pseudoge   | 14 | 68217945  | 68218261             |
| ENSG00000239821 | 0.499066092 | 0.390640832 | scRNA_pseudoge   | 19 | 18444086  | 18444383             |
| ENSG00000239822 | 0           | 0.390640832 | scRNA_pseudoge   | 10 | 476179    | 476444               |
| ENSG00000239827 | 1.960915222 | 0.697730409 | protein_coding   | 13 | 41482294  | 41495910 SUGT1P3     |
| ENSG00000239830 | 6.212449006 | 6.619638408 | pseudogene       | 19 | 9793970   | 9794749              |
| ENSG00000239835 | 1.16343121  | 1.16600992  | pseudogene       | 3  | 119747587 | 119748715            |

|                 |             |             |                  |    |           |           |            |
|-----------------|-------------|-------------|------------------|----|-----------|-----------|------------|
| ENSG00000239840 | 0           | 0.390640832 | pseudogene       | 16 | 47184043  | 47184477  | RPL23AP72  |
| ENSG00000239843 | 6.75547892  | 6.803579823 | rRNA_pseudogen   | 7  | 80962917  | 80963147  |            |
| ENSG00000239850 | 3.335220907 | 2.912743273 | scRNA_pseudoge   | 1  | 150541447 | 150541745 |            |
| ENSG00000239857 | 6.435508026 | 6.45552765  | protein_coding   | 7  | 916189    | 936073    | GET4       |
| ENSG00000239873 | 0           | 0.390640832 | pseudogene       | 1  | 120101378 | 120102397 | GAPDHP27   |
| ENSG00000239883 | 0.869158192 | 0.950786998 | processed_transc | 10 | 46349534  | 46411606  |            |
| ENSG00000239884 | 2.471521042 | 3.081239798 | scRNA_pseudoge   | 17 | 2584250   | 2584530   |            |
| ENSG00000239887 | 5.191549282 | 2.912743273 | protein_coding   | 1  | 162336698 | 162356600 | C1orf226   |
| ENSG00000239899 | 4.491309013 | 4.468996429 | scRNA_pseudoge   | 2  | 11724899  | 11725098  |            |
| ENSG00000239900 | 10.01436362 | 10.46944323 | protein_coding   | 22 | 40742507  | 40764823  | ADSL       |
| ENSG00000239906 | 2.671945279 | 2.039052734 | antisense        | 1  | 139790    | 140339    |            |
| ENSG00000239908 | 1.799000381 | 1.16600992  | scRNA_pseudoge   | 9  | 102864841 | 102865121 |            |
| ENSG00000239909 | 0.869158192 | 0.390640832 | rRNA_pseudogen   | 5  | 122990602 | 122991011 |            |
| ENSG00000239911 | 5.360713447 | 4.888000647 | antisense        | 7  | 151574127 | 151576299 |            |
| ENSG00000239912 | 3.004694206 | 2.579085888 | pseudogene       | 19 | 53916443  | 53916598  |            |
| ENSG00000239917 | 0.499066092 | 0           | pseudogene       | 8  | 118535510 | 118536300 | RPS10P16   |
| ENSG00000239919 | 0.869158192 | 0.950786998 | pseudogene       | 7  | 129117716 | 129117942 | SNRPGP3    |
| ENSG00000239920 | 0.499066092 | 0           | processed_transc | 11 | 5593552   | 5646126   |            |
| ENSG00000239923 | 0           | 0.390640832 | scRNA_pseudoge   | 20 | 14203698  | 14203915  |            |
| ENSG00000239926 | 0.499066092 | 0.950786998 | pseudogene       | 3  | 64160077  | 64160823  |            |
| ENSG00000239930 | 0           | 1.16600992  | processed_transc | 21 | 43916118  | 43918313  |            |
| ENSG00000239935 | 14.91360146 | 14.88064798 | rRNA_pseudogen   | 5  | 71146740  | 71146942  |            |
| ENSG00000239943 | 0.869158192 | 0.697730409 | rRNA_pseudogen   | 12 | 38531448  | 38531930  |            |
| ENSG00000239946 | 0           | 0.697730409 | lincRNA          | 3  | 114591961 | 114595361 | ZBTB20-AS3 |
| ENSG00000239948 | 2.762599152 | 0.697730409 | scRNA_pseudoge   | 19 | 44164642  | 44164928  |            |
| ENSG00000239953 | 0.499066092 | 0           | scRNA_pseudoge   | 6  | 37328961  | 37329259  |            |
| ENSG00000239959 | 0.869158192 | 0.950786998 | pseudogene       | 3  | 75495920  | 75540353  |            |
| ENSG00000239976 | 0.499066092 | 0.697730409 | snRNA_pseudoge   | 11 | 62634154  | 62634346  |            |
| ENSG00000239983 | 0           | 0.390640832 | pseudogene       | 4  | 33969796  | 33970148  |            |
| ENSG00000239996 | 0.499066092 | 0           | snoRNA_pseudog   | 2  | 55806556  | 55806626  |            |
| ENSG00000239997 | 0           | 0.390640832 | pseudogene       | 3  | 106567518 | 106568107 |            |
| ENSG00000240002 | 0           | 0.390640832 | pseudogene       | 3  | 114649388 | 114650296 | YBX1P3     |
| ENSG00000240003 | 0.869158192 | 0.950786998 | pseudogene       | 5  | 79796151  | 79797219  |            |
| ENSG00000240004 | 0.869158192 | 0.697730409 | scRNA_pseudoge   | 19 | 15418447  | 15418645  |            |
| ENSG00000240005 | 1.616589159 | 1.353254395 | antisense        | 4  | 26861428  | 26862221  |            |
| ENSG00000240006 | 0.499066092 | 0.950786998 | lincRNA          | 3  | 134032418 | 134040013 |            |
| ENSG00000240007 | 0           | 0.390640832 | pseudogene       | 1  | 143719704 | 143721519 |            |
| ENSG00000240015 | 0.499066092 | 0.390640832 | antisense        | 8  | 37980792  | 37982169  |            |
| ENSG00000240022 | 0.499066092 | 0           | scRNA_pseudoge   | 2  | 24228262  | 24228483  |            |
| ENSG00000240023 | 0.499066092 | 0.390640832 | pseudogene       | 14 | 35857327  | 35858275  |            |
| ENSG00000240024 | 4.981125677 | 5.486957566 | pseudogene       | 3  | 183165396 | 183173801 |            |
| ENSG00000240032 | 2.10647801  | 3.183544561 | antisense        | 3  | 145784131 | 145786972 |            |
| ENSG00000240036 | 0.499066092 | 1.16600992  | pseudogene       | 11 | 27603227  | 27603602  |            |
| ENSG00000240038 | 0.869158192 | 0.697730409 | protein_coding   | 1  | 104096437 | 104122156 | AMY2B      |
| ENSG00000240048 | 1.407729925 | 2.039052734 | pseudogene       | 3  | 154069925 | 154072588 | DDX50P2    |
| ENSG00000240050 | 2.10647801  | 2.501982735 | processed_transc | 6  | 116601362 | 116691436 |            |
| ENSG00000240051 | 0           | 0.390640832 | pseudogene       | 14 | 96922913  | 96923378  |            |
| ENSG00000240053 | 5.741167503 | 5.863430791 | protein_coding   | 6  | 31636895  | 31641553  | LY6G5B     |
| ENSG00000240057 | 1.16343121  | 1.802319292 | antisense        | 3  | 112738379 | 112902148 |            |
| ENSG00000240063 | 0.499066092 | 0.950786998 | antisense        | 3  | 182501024 | 182511182 |            |
| ENSG00000240065 | 9.064459359 | 9.564707123 | protein_coding   | 6  | 32811913  | 32847364  | PSMB9      |
| ENSG00000240067 | 0           | 0.390640832 | scRNA_pseudoge   | 8  | 70763383  | 70763657  |            |
| ENSG00000240072 | 2.847891871 | 2.579085888 | scRNA_pseudoge   | 22 | 24221349  | 24221606  |            |
| ENSG00000240074 | 0.869158192 | 0.390640832 | pseudogene       | 17 | 28182777  | 28183350  |            |
| ENSG00000240087 | 0           | 1.16600992  | pseudogene       | 12 | 68946775  | 68947662  |            |
| ENSG00000240093 | 1.16343121  | 0.950786998 | antisense        | 7  | 182935    | 194180    |            |
| ENSG00000240095 | 0           | 0.390640832 | lincRNA          | 3  | 145679542 | 145681410 |            |
| ENSG00000240096 | 1.616589159 | 0.950786998 | pseudogene       | 14 | 93689944  | 93690485  |            |
| ENSG00000240098 | 0           | 0.390640832 | scRNA_pseudoge   | 11 | 126114930 | 126115177 |            |
| ENSG00000240106 | 1.16343121  | 1.667587519 | scRNA_pseudoge   | 19 | 16650513  | 16650795  |            |
| ENSG00000240114 | 0.499066092 | 0           | Mt_tRNA_pseudc   | 19 | 38067154  | 38067223  |            |
| ENSG00000240117 | 1.960915222 | 1.667587519 | rRNA_pseudogen   | 17 | 19355539  | 19356104  |            |
| ENSG00000240125 | 0.499066092 | 0           | pseudogene       | 17 | 38595719  | 38596169  |            |



|                 |             |             |                  |    |           |           |             |
|-----------------|-------------|-------------|------------------|----|-----------|-----------|-------------|
| ENSG00000240128 | 0           | 0.390640832 | pseudogene       | 3  | 169620768 | 169622048 | KRT18P43    |
| ENSG00000240132 | 2.671945279 | 1.802319292 | pseudogene       | 7  | 151198964 | 151200549 | ETF1P2      |
| ENSG00000240135 | 0.499066092 | 0.390640832 | pseudogene       | 3  | 72925888  | 72927253  |             |
| ENSG00000240137 | 2.57521082  | 2.334191469 | antisense        | 3  | 150421351 | 150437933 |             |
| ENSG00000240143 | 0           | 1.16600992  | processed_transc | X  | 128928970 | 128930939 |             |
| ENSG00000240150 | 0.499066092 | 0.697730409 | Mt_tRNA_pseudc   | 2  | 202414210 | 202414281 |             |
| ENSG00000240155 | 1.407729925 | 1.16600992  | Mt_tRNA_pseudc   | 1  | 564952    | 565019    |             |
| ENSG00000240159 | 0           | 0.950786998 | pseudogene       | 4  | 185175662 | 185176483 |             |
| ENSG00000240160 | 0.499066092 | 0           | scRNA_pseudoge   | 22 | 23603969  | 23604250  |             |
| ENSG00000240163 | 3.698846687 | 2.971122874 | pseudogene       | 15 | 60682570  | 60682881  |             |
| ENSG00000240166 | 0.499066092 | 0           | scRNA_pseudoge   | 13 | 49003405  | 49003610  |             |
| ENSG00000240175 | 0           | 1.16600992  | antisense        | 3  | 65879491  | 65910972  | MAGI1-AS1   |
| ENSG00000240183 | 0           | 0.390640832 | scRNA_pseudoge   | 2  | 112687804 | 112688042 |             |
| ENSG00000240184 | 8.043616684 | 7.096940025 | protein_coding   | 5  | 140855580 | 140892542 | PCDHGC3     |
| ENSG00000240185 | 0.499066092 | 0.697730409 | processed_transc | 19 | 37957641  | 37960165  |             |
| ENSG00000240198 | 0           | 0.390640832 | antisense        | 3  | 56974068  | 56994882  | ARHGEF3-AS1 |
| ENSG00000240204 | 5.124761037 | 5.42565083  | protein_coding   | 7  | 129142320 | 129152759 |             |
| ENSG00000240207 | 2.847891871 | 2.851901313 | processed_transc | 3  | 158450116 | 158501859 |             |
| ENSG00000240210 | 0.499066092 | 1.16600992  | pseudogene       | 14 | 68805445  | 68806258  |             |
| ENSG00000240211 | 0.869158192 | 0           | antisense        | 7  | 100033827 | 100036127 |             |
| ENSG00000240212 | 0.499066092 | 0           | scRNA_pseudoge   | 15 | 49377702  | 49377794  |             |
| ENSG00000240216 | 1.16343121  | 0           | pseudogene       | 3  | 148947143 | 148994451 | CPHL1P      |
| ENSG00000240219 | 1.407729925 | 0.950786998 | lincRNA          | 1  | 204595903 | 204598840 |             |
| ENSG00000240225 | 8.521975964 | 8.637044457 | pseudogene       | 19 | 56879468  | 56891197  | ZNF542      |
| ENSG00000240230 | 7.565780433 | 7.151604372 | protein_coding   | 7  | 938415    | 1015235   | COX19       |
| ENSG00000240231 | 0           | 1.802319292 | pseudogene       | 19 | 23780143  | 23780394  |             |
| ENSG00000240233 | 1.16343121  | 0.950786998 | scRNA_pseudoge   | 14 | 78013909  | 78014201  |             |
| ENSG00000240239 | 0.869158192 | 0.950786998 | scRNA_pseudoge   | 14 | 55751945  | 55752276  |             |
| ENSG00000240243 | 0.499066092 | 0.950786998 | tRNA_pseudogen   | 14 | 24027031  | 24027100  |             |
| ENSG00000240244 | 0.869158192 | 0.390640832 | pseudogene       | 1  | 120138790 | 120139802 | GAPDHP33    |
| ENSG00000240250 | 0.499066092 | 0           | scRNA_pseudoge   | 5  | 133853501 | 133853728 |             |
| ENSG00000240254 | 0.499066092 | 0           | antisense        | 3  | 118945333 | 119009513 | B4GALT4-AS1 |
| ENSG00000240256 | 1.16343121  | 1.518964905 | processed_transc | 3  | 65858490  | 65940233  | MAGI1-IT1   |
| ENSG00000240262 | 0.499066092 | 0.950786998 | rRNA_pseudogen X |    | 133660311 | 133660450 |             |
| ENSG00000240270 | 0           | 0.697730409 | pseudogene       | 17 | 78950254  | 78950748  |             |
| ENSG00000240271 | 0.499066092 | 0           | pseudogene       | 8  | 106023335 | 106023796 |             |
| ENSG00000240275 | 0.499066092 | 0.697730409 | scRNA_pseudoge   | 1  | 33129760  | 33129850  |             |
| ENSG00000240277 | 0           | 0.390640832 | Mt_tRNA_pseudc   | 19 | 12206905  | 12206962  |             |
| ENSG00000240280 | 7.792473675 | 7.911465009 | pseudogene       | 17 | 61926652  | 61941739  |             |
| ENSG00000240286 | 0.499066092 | 0           | pseudogene       | 2  | 210043528 | 210046742 | MEAF6P1     |
| ENSG00000240288 | 4.230497448 | 4.585695337 | processed_transc | 3  | 10327472  | 10334334  | GHRLOS      |
| ENSG00000240291 | 4.026095388 | 3.993387124 | processed_transc | 10 | 18802044  | 18834580  |             |
| ENSG00000240293 | 0.499066092 | 0.950786998 | processed_transc | 22 | 35796135  | 35806001  |             |
| ENSG00000240298 | 0           | 0.390640832 | pseudogene       | 11 | 25610021  | 25610389  | RPL36AP40   |
| ENSG00000240299 | 0.499066092 | 0.390640832 | scRNA_pseudoge   | 9  | 124256797 | 124257099 |             |
| ENSG00000240303 | 0           | 0.390640832 | protein_coding   | 3  | 132276982 | 132379567 | ACAD11      |
| ENSG00000240305 | 1.16343121  | 1.802319292 | pseudogene       | 17 | 42797128  | 42797965  |             |
| ENSG00000240308 | 0.499066092 | 0           | snRNA_pseudoge   | 2  | 232622597 | 232622660 |             |
| ENSG00000240311 | 0.499066092 | 0.950786998 | pseudogene       | 16 | 3546201   | 3546768   |             |
| ENSG00000240322 | 2.10647801  | 0.697730409 | scRNA_pseudoge   | 7  | 142995610 | 142995905 |             |
| ENSG00000240328 | 0.499066092 | 0           | pseudogene       | 12 | 19661838  | 19662179  |             |
| ENSG00000240336 | 7.214780754 | 7.326703453 | processed_transc | 9  | 37485959  | 37506561  |             |
| ENSG00000240338 | 2.471521042 | 2.144285137 | pseudogene       | 16 | 75259972  | 75262093  |             |
| ENSG00000240342 | 3.211941663 | 3.781359661 | pseudogene       | 12 | 118683877 | 118684807 | RPS2P5      |
| ENSG00000240344 | 6.710639711 | 7.100213554 | protein_coding   | 2  | 201735630 | 201754026 | PPIL3       |
| ENSG00000240350 | 3.652182994 | 3.679994897 | lincRNA          | 2  | 112248850 | 112268567 |             |
| ENSG00000240351 | 0           | 0.390640832 | scRNA_pseudoge   | 8  | 28773096  | 28773381  |             |
| ENSG00000240356 | 3.744048221 | 3.935919592 | pseudogene       | 2  | 114368079 | 114384667 | RPL23AP7    |
| ENSG00000240366 | 0.499066092 | 0.950786998 | pseudogene       | 15 | 75478992  | 75479309  | RPL36AP45   |
| ENSG00000240368 | 1.407729925 | 0.950786998 | processed_transc | 21 | 34931848  | 34950669  |             |
| ENSG00000240370 | 5.458875168 | 5.03207928  | pseudogene       | 12 | 6982553   | 6993905   | RPL13P5     |
| ENSG00000240371 | 1.960915222 | 2.039052734 | pseudogene       | 11 | 57343765  | 57344553  |             |
| ENSG00000240375 | 0           | 0.390640832 | pseudogene       | 3  | 113638069 | 113639047 |             |

|                 |             |             |                  |    |           |                      |
|-----------------|-------------|-------------|------------------|----|-----------|----------------------|
| ENSG00000240376 | 2.928422289 | 4.048652948 | pseudogene       | 5  | 33162285  | 33162913             |
| ENSG00000240379 | 8.364450825 | 8.394645624 | scRNA_pseudoge   | 6  | 74197313  | 74197600             |
| ENSG00000240387 | 0           | 0.390640832 | scRNA_pseudoge   | 4  | 190814875 | 190815073            |
| ENSG00000240388 | 0.499066092 | 1.518964905 | pseudogene       | 5  | 90650295  | 90650751             |
| ENSG00000240392 | 0.499066092 | 0.390640832 | pseudogene       | 14 | 35731668  | 35732242             |
| ENSG00000240395 | 1.16343121  | 1.16600992  | pseudogene       | 8  | 42199285  | 42200152             |
| ENSG00000240399 | 2.238690726 | 1.802319292 | pseudogene       | 12 | 48448596  | 48449374             |
| ENSG00000240401 | 0           | 0.390640832 | antisense        | 2  | 55535967  | 55541797             |
| ENSG00000240405 | 0.499066092 | 1.16600992  | processed_transc | 3  | 70048728  | 70064469             |
| ENSG00000240409 | 1.799000381 | 0.390640832 | pseudogene       | 1  | 568915    | 569121               |
| ENSG00000240414 | 5.090170488 | 5.018301917 | Mt_tRNA_pseudc   | 1  | 566376    | 566441               |
| ENSG00000240418 | 1.799000381 | 1.667587519 | pseudogene       | 19 | 16523495  | 16524387             |
| ENSG00000240428 | 0.499066092 | 0.390640832 | protein_coding   | 2  | 110656009 | 110726134 LIMS3      |
| ENSG00000240429 | 3.448790144 | 3.368666104 | pseudogene       | 3  | 178976816 | 178979061 LRRFIP1P1  |
| ENSG00000240435 | 0           | 1.353254395 | pseudogene       | 16 | 68243365  | 68243684             |
| ENSG00000240440 | 0.499066092 | 0           | lincRNA          | 2  | 208100023 | 208102599            |
| ENSG00000240441 | 0.869158192 | 0           | pseudogene       | 12 | 108113376 | 108113910            |
| ENSG00000240442 | 0           | 0.390640832 | rRNA_pseudogen   | 18 | 21191674  | 21191827             |
| ENSG00000240445 | 5.072559152 | 5.236305879 | pseudogene       | 17 | 18574217  | 18576239             |
| ENSG00000240449 | 3.698846687 | 3.96493948  | antisense        | 7  | 150060866 | 150069679            |
| ENSG00000240455 | 1.16343121  | 0           | scRNA_pseudoge   | 4  | 1870787   | 1871064              |
| ENSG00000240457 | 0           | 0.950786998 | scRNA_pseudoge   | 14 | 102543517 | 102543806            |
| ENSG00000240459 | 0.499066092 | 0           | pseudogene       | 4  | 113037666 | 113038059            |
| ENSG00000240463 | 3.871730003 | 4.585695337 | pseudogene       | 14 | 35037895  | 35038335 RPS19P3     |
| ENSG00000240468 | 2.57521082  | 3.453019579 | lincRNA          | 17 | 33615     | 37038                |
| ENSG00000240470 | 0.499066092 | 0           | scRNA_pseudoge   | 15 | 90709468  | 90709758             |
| ENSG00000240476 | 4.517578978 | 5.709041716 | lincRNA          | 3  | 98699902  | 98701940             |
| ENSG00000240480 | 1.16343121  | 1.353254395 | pseudogene       | 17 | 7657638   | 7658294 RPL29P2      |
| ENSG00000240485 | 0.499066092 | 0.390640832 | rRNA_pseudogen   | 7  | 104630545 | 104630760            |
| ENSG00000240489 | 2.671945279 | 2.501982735 | pseudogene       | 3  | 155705093 | 155705965 SETP14     |
| ENSG00000240493 | 0.869158192 | 0.950786998 | tRNA_pseudogen   | 19 | 41748142  | 41748214 TRNAK38P    |
| ENSG00000240494 | 2.471521042 | 0.697730409 | pseudogene       | 17 | 26982610  | 26982999             |
| ENSG00000240495 | 1.407729925 | 1.16600992  | rRNA_pseudogen   | 2  | 128049135 | 128049383            |
| ENSG00000240497 | 0.499066092 | 0.950786998 | lincRNA          | 3  | 171185873 | 171187422            |
| ENSG00000240498 | 2.928422289 | 3.608232228 | processed_transc | 9  | 21994790  | 22121096 CDKN2B-AS   |
| ENSG00000240499 | 0.499066092 | 0           | antisense        | 7  | 121968523 | 122019000            |
| ENSG00000240505 | 0           | 0.390640832 | protein_coding   | 17 | 16832849  | 16875402 TNFRSF13B   |
| ENSG00000240509 | 1.16343121  | 1.16600992  | pseudogene       | 8  | 94969566  | 94969919             |
| ENSG00000240512 | 1.616589159 | 0.390640832 | scRNA_pseudoge   | 19 | 58581834  | 58581920             |
| ENSG00000240522 | 3.393122761 | 3.570966319 | pseudogene       | 19 | 21332451  | 21333241             |
| ENSG00000240529 | 3.830412367 | 4.794098771 | processed_transc | 22 | 31832963  | 31835893             |
| ENSG00000240531 | 0.869158192 | 0.390640832 | pseudogene       | 17 | 28043297  | 28043703             |
| ENSG00000240540 | 1.616589159 | 1.16600992  | pseudogene       | 8  | 80483388  | 80484570 RPL3P9      |
| ENSG00000240541 | 1.616589159 | 0.950786998 | antisense        | 3  | 149095565 | 149104370 TM4SF1-AS1 |
| ENSG00000240549 | 1.616589159 | 1.353254395 | antisense        | 3  | 63846321  | 63847495 THOC7-AS1   |
| ENSG00000240551 | 0           | 0.390640832 | scRNA_pseudoge   | 5  | 78523097  | 78523353             |
| ENSG00000240554 | 0.869158192 | 0.950786998 | pseudogene       | 11 | 29747311  | 29748112 RPL7AP58    |
| ENSG00000240567 | 0           | 0.950786998 | processed_transc | 3  | 161144215 | 161166030            |
| ENSG00000240571 | 1.407729925 | 0.697730409 | antisense        | 7  | 129813558 | 129845201            |
| ENSG00000240579 | 0           | 0.390640832 | pseudogene       | 7  | 127497905 | 127498541            |
| ENSG00000240583 | 5.175139844 | 5.187895122 | protein_coding   | 7  | 30893010  | 30965131 AQP1        |
| ENSG00000240589 | 0.499066092 | 1.16600992  | scRNA_pseudoge   | 17 | 42486427  | 42486726             |
| ENSG00000240591 | 0.869158192 | 0.390640832 | antisense        | 22 | 31850237  | 31860190             |
| ENSG00000240602 | 3.077135474 | 0.697730409 | pseudogene       | 3  | 151488216 | 151502682            |
| ENSG00000240607 | 0.499066092 | 0.697730409 | scRNA_pseudoge   | 2  | 122409203 | 122409310            |
| ENSG00000240614 | 0           | 0.390640832 | scRNA_pseudoge   | 19 | 33145583  | 33145851             |
| ENSG00000240616 | 3.146112541 | 3.714580548 | pseudogene       | 19 | 13004947  | 13005694             |
| ENSG00000240618 | 4.062237333 | 3.532712221 | processed_transc | 1  | 694412    | 700305               |
| ENSG00000240622 | 0.499066092 | 0.390640832 | pseudogene       | 3  | 123870807 | 123871910            |
| ENSG00000240624 | 3.744048221 | 4.048652948 | pseudogene       | 14 | 103749270 | 103749805            |
| ENSG00000240625 | 1.407729925 | 0.697730409 | scRNA_pseudoge   | 6  | 43003934  | 43004238             |
| ENSG00000240634 | 1.799000381 | 2.971122874 | pseudogene       | 16 | 28825301  | 28825994             |
| ENSG00000240645 | 0           | 0.390640832 | scRNA_pseudoge   | 16 | 58762500  | 58762580 RNY5P9      |

|                 |             |             |                            |    |           |                       |
|-----------------|-------------|-------------|----------------------------|----|-----------|-----------------------|
| ENSG00000240652 | 4.821592551 | 5.018301917 | pseudogene                 | 11 | 107779146 | 107779490             |
| ENSG00000240654 | 0.499066092 |             | 0 protein_coding           | 13 | 24881304  | 24896673 C1QTNF9      |
| ENSG00000240656 | 10.88083905 | 10.73119995 | rRNA_pseudogen             | 17 | 75158032  | 75158389              |
| ENSG00000240660 | 1.407729925 | 1.667587519 | pseudogene                 | 10 | 52418289  | 52420232              |
| ENSG00000240661 | 0.499066092 |             | 0 antisense                | 3  | 120068357 | 120086845             |
| ENSG00000240668 | 1.616589159 | 1.353254395 | pseudogene                 | 3  | 137820320 | 137821759 KRT8P36     |
| ENSG00000240673 | 1.407729925 | 1.667587519 | pseudogene                 | 19 | 20190627  | 20191348              |
| ENSG00000240674 | 0.499066092 |             | 0 pseudogene               | 4  | 165933518 | 165933997             |
| ENSG00000240680 | 0.499066092 |             | 0 pseudogene               | 7  | 130507964 | 130508270             |
| ENSG00000240681 | 0.499066092 |             | 0 scRNA_pseudoge           | 12 | 46267823  | 46268113              |
| ENSG00000240682 | 7.292905885 | 6.737844962 | protein_coding             | 3  | 128846258 | 128880136 ISY1        |
| ENSG00000240694 | 5.191549282 | 3.453019579 | protein_coding             | 8  | 26362217  | 26371608 PNMA2        |
| ENSG00000240695 | 0.499066092 | 1.16600992  | pseudogene                 | 3  | 136455342 | 136456071             |
| ENSG00000240701 | 0.499066092 |             | 0 Mt_tRNA_pseudc           | 11 | 122874304 | 122874371             |
| ENSG00000240704 | 0.499066092 | 0.950786998 | pseudogene                 | 3  | 170670639 | 170671686 KLF7P1      |
| ENSG00000240707 | 0.869158192 |             | 0 processed_transc         | 10 | 134779038 | 134789858             |
| ENSG00000240710 |             | 0           | 0.390640832 antisense      | 1  | 204572163 | 204585693             |
| ENSG00000240718 | 1.16343121  | 0.950786998 | scRNA_pseudoge             | 7  | 6087354   | 6087645               |
| ENSG00000240720 |             | 0           | 0.390640832 protein_coding | 7  | 91741473  | 91808845 LRRD1        |
| ENSG00000240723 |             | 0           | 0.390640832 scRNA_pseudoge | 4  | 140021531 | 140021812             |
| ENSG00000240724 |             | 0           | 0.390640832 pseudogene     | 8  | 103515981 | 103516365 RPS12P15    |
| ENSG00000240729 | 0.499066092 | 0.390640832 | pseudogene                 | 5  | 176691767 | 176692242             |
| ENSG00000240731 | 4.999881834 | 4.888000647 | processed_transc           | 1  | 1252961   | 1254069               |
| ENSG00000240733 | 0.499066092 | 0.390640832 | scRNA_pseudoge             | 6  | 36418699  | 36418974              |
| ENSG00000240738 | 0.499066092 | 0.950786998 | pseudogene                 | 8  | 33716998  | 33717741              |
| ENSG00000240742 | 2.671945279 | 3.608232228 | processed_transc           | 20 | 44650415  | 44656438              |
| ENSG00000240743 |             | 0           | 0.390640832 snoRNA_pseudog | 14 | 102840581 | 102840656             |
| ENSG00000240747 | 4.642199401 | 5.960284481 | protein_coding             | 3  | 42850938  | 43097363 KRBOX1       |
| ENSG00000240750 | 0.869158192 | 0.697730409 | scRNA_pseudoge             | 1  | 28358395  | 28358691              |
| ENSG00000240751 | 0.869158192 | 1.353254395 | pseudogene                 | 3  | 113079114 | 113080166             |
| ENSG00000240758 | 3.911897206 | 3.993387124 | pseudogene                 | 7  | 128095991 | 128109251             |
| ENSG00000240759 | 0.499066092 | 0.390640832 | pseudogene                 | 12 | 43072675  | 43072926              |
| ENSG00000240761 | 2.57521082  | 2.912743273 | pseudogene                 | 2  | 203638443 | 203639083             |
| ENSG00000240764 | 2.238690726 | 2.912743273 | protein_coding             | 5  | 140868808 | 140892546 PCDHGC5     |
| ENSG00000240770 | 0.499066092 | 0.390640832 | processed_transc           | 21 | 19135632  | 19164840 C21orf91-OT1 |
| ENSG00000240771 | 6.442380648 | 7.195117037 | protein_coding             | 12 | 58003963  | 58017959 ARHGEF25     |
| ENSG00000240776 | 1.407729925 | 1.16600992  | pseudogene                 | 3  | 113569084 | 113569578             |
| ENSG00000240790 | 0.869158192 |             | 0 antisense                | 7  | 127284739 | 127292066             |
| ENSG00000240791 | 0.499066092 |             | 0 pseudogene               | 9  | 94872857  | 94873150              |
| ENSG00000240793 | 1.16343121  | 1.353254395 | pseudogene                 | 16 | 48368382  | 48368765 UBA52P8      |
| ENSG00000240794 | 8.668385155 | 8.606292299 | scRNA_pseudoge             | 7  | 72312016  | 72312305              |
| ENSG00000240806 |             | 0           | 0.390640832 scRNA_pseudoge | 3  | 9416007   | 9416135               |
| ENSG00000240808 | 1.16343121  | 0.950786998 | pseudogene                 | 11 | 17159523  | 17159812              |
| ENSG00000240809 | 3.274897671 | 3.493416095 | pseudogene                 | 3  | 76483169  | 76484579              |
| ENSG00000240820 | 0.869158192 | 0.390640832 | scRNA_pseudoge             | 18 | 48633122  | 48633416              |
| ENSG00000240823 | 0.869158192 | 1.667587519 | scRNA_pseudoge             | 11 | 61211612  | 61211901              |
| ENSG00000240828 | 0.499066092 | 0.390640832 | pseudogene                 | 17 | 41231319  | 41231797              |
| ENSG00000240831 | 12.27617308 | 12.16449493 | rRNA_pseudogen             | 12 | 20704358  | 20704522              |
| ENSG00000240849 | 9.098577113 | 8.704198827 | protein_coding             | 20 | 48697663  | 48770335 TMEM189      |
| ENSG00000240854 | 4.821592551 | 4.961837817 | pseudogene                 | 3  | 131894246 | 131895555             |
| ENSG00000240857 | 6.99208722  | 6.445267191 | protein_coding             | 2  | 18735989  | 18741946 RDH14        |
| ENSG00000240859 | 5.191549282 | 5.47691899  | processed_transc           | 7  | 149597    | 155465                |
| ENSG00000240860 |             | 0           | 0.390640832 scRNA_pseudoge | 6  | 105278662 | 105278922             |
| ENSG00000240861 |             | 0           | 0.390640832 pseudogene     | 16 | 74586149  | 74586644              |
| ENSG00000240869 | 11.38846227 | 11.30395119 | scRNA_pseudoge             | 6  | 20421880  | 20422118              |
| ENSG00000240875 | 4.593635215 | 4.566889334 | processed_transc           | 3  | 156465135 | 156534851             |
| ENSG00000240877 | 0.499066092 | 1.802319292 | scRNA_pseudoge             | 7  | 148822783 | 148823078             |
| ENSG00000240878 | 0.499066092 |             | 0 scRNA_pseudoge           | 2  | 120628997 | 120629160             |
| ENSG00000240882 | 1.16343121  | 1.353254395 | pseudogene                 | 3  | 120025573 | 120026799             |
| ENSG00000240888 | 0.499066092 |             | 0 sense_intronic           | 3  | 143031909 | 143033271             |
| ENSG00000240889 | 2.471521042 | 2.144285137 | antisense                  | 7  | 140395136 | 140396877             |
| ENSG00000240890 | 0.499066092 | 0.697730409 | pseudogene                 | 3  | 132105366 | 132107918             |
| ENSG00000240891 | 3.603959378 | 3.453019579 | protein_coding             | 3  | 111393523 | 111565294 PLCXD2      |

|                 |             |             |                  |    |           |                           |
|-----------------|-------------|-------------|------------------|----|-----------|---------------------------|
| ENSG00000240895 | 0           | 0.390640832 | lincRNA          | 3  | 110246329 | 110248429                 |
| ENSG00000240896 | 0           | 0.390640832 | Mt_tRNA_pseudc X |    | 102065046 | 102065114                 |
| ENSG00000240898 | 1.16343121  | 2.144285137 | pseudogene       | 17 | 3568514   | 3568996                   |
| ENSG00000240905 | 0           | 0.390640832 | scRNA_pseudoge   | 8  | 56892800  | 56893093                  |
| ENSG00000240906 | 2.928422289 | 1.518964905 | pseudogene       | 22 | 25047814  | 25048364                  |
| ENSG00000240912 | 0.499066092 | 0.390640832 | pseudogene       | 3  | 113822096 | 113822475                 |
| ENSG00000240914 | 0           | 0.950786998 | pseudogene       | 14 | 95267186  | 95267800 RPL15P2          |
| ENSG00000240915 | 0           | 0.697730409 | antisense        | 8  | 63925627  | 63927240                  |
| ENSG00000240925 | 0           | 0.950786998 | pseudogene       | 12 | 120685263 | 120685594 RPS20P31        |
| ENSG00000240934 | 0.499066092 | 0           | pseudogene       | 15 | 58492805  | 58493214                  |
| ENSG00000240935 | 1.799000381 | 1.667587519 | pseudogene       | 2  | 106998562 | 107010027 PLGLA           |
| ENSG00000240950 | 2.238690726 | 2.721932731 | pseudogene       | 3  | 142545938 | 142546570                 |
| ENSG00000240954 | 1.407729925 | 0           | pseudogene       | 14 | 22218553  | 22219830                  |
| ENSG00000240964 | 0.869158192 | 0.390640832 | scRNA_pseudoge   | 3  | 78987189  | 78987429                  |
| ENSG00000240970 | 3.744048221 | 3.781359661 | pseudogene       | 11 | 118873722 | 118874156 RPL23AP64       |
| ENSG00000240972 | 3.335220907 | 3.493416095 | protein_coding   | 22 | 24236191  | 24237414 MIF              |
| ENSG00000240984 | 3.502389126 | 4.17820932  | processed_transc | 17 | 18601367  | 18639432                  |
| ENSG00000240990 | 0.499066092 | 0           | antisense        | 7  | 27224137  | 27228912 HOXA11-AS1       |
| ENSG00000240991 | 1.407729925 | 1.16600992  | pseudogene       | 12 | 133702065 | 133702536 RPL23AP67       |
| ENSG00000240996 | 1.407729925 | 0.697730409 | antisense        | 10 | 91454052  | 91457685                  |
| ENSG00000241007 | 1.16343121  | 1.16600992  | pseudogene       | 7  | 152064604 | 152065746 SEPT7P6         |
| ENSG00000241008 | 0.869158192 | 0           | pseudogene       | 11 | 7805244   | 7805954                   |
| ENSG00000241011 | 0           | 0.697730409 | pseudogene       | 4  | 189027712 | 189028068                 |
| ENSG00000241014 | 4.800350936 | 4.604259349 | processed_transc | 1  | 35439957  | 35450914                  |
| ENSG00000241015 | 6.710639711 | 6.624193585 | pseudogene       | 19 | 53935237  | 53947923                  |
| ENSG00000241026 | 0           | 0.390640832 | pseudogene       | 8  | 22247378  | 22248168                  |
| ENSG00000241030 | 0.869158192 | 0           | pseudogene       | 12 | 120960467 | 120961246 RPL29P24        |
| ENSG00000241035 | 0.499066092 | 0.390640832 | pseudogene       | 14 | 21867084  | 21867398                  |
| ENSG00000241043 | 3.077135474 | 3.027231696 | protein_coding   | 9  | 32566787  | 32568619 TIGD1L2          |
| ENSG00000241047 | 0.499066092 | 0           | Mt_tRNA_pseudc   | 5  | 79946867  | 79946935                  |
| ENSG00000241051 | 0.499066092 | 0.390640832 | Mt_tRNA_pseudc   | 16 | 3419744   | 3419811                   |
| ENSG00000241056 | 2.35979773  | 2.242360793 | rRNA_pseudogen   | 16 | 29941277  | 29941461                  |
| ENSG00000241057 | 1.407729925 | 1.16600992  | pseudogene       | 7  | 44001189  | 44012924                  |
| ENSG00000241058 | 7.026383958 | 6.440109466 | protein_coding   | 10 | 18834490  | 18940551 NSUN6            |
| ENSG00000241059 | 0.499066092 | 0           | antisense        | 5  | 90651197  | 90651843                  |
| ENSG00000241061 | 0.869158192 | 1.16600992  | pseudogene       | 15 | 25154076  | 25154972                  |
| ENSG00000241081 | 2.762599152 | 3.32456471  | pseudogene       | 14 | 77352720  | 77353093                  |
| ENSG00000241093 | 0.869158192 | 0.950786998 | Mt_tRNA_pseudc   | 11 | 10530736  | 10530804                  |
| ENSG00000241095 | 0.869158192 | 0.390640832 | pseudogene       | 3  | 82855666  | 82857172                  |
| ENSG00000241104 | 1.16343121  | 2.242360793 | pseudogene       | 19 | 43715943  | 43752798 CEACAMP10        |
| ENSG00000241106 | 0.869158192 | 0.950786998 | protein_coding   | 6  | 32780540  | 32784825 HLA-DOB          |
| ENSG00000241107 | 0           | 0.390640832 | processed_transc | 10 | 15139236  | 15181817                  |
| ENSG00000241111 | 0.869158192 | 0.697730409 | antisense        | 3  | 64053640  | 64088807                  |
| ENSG00000241112 | 1.16343121  | 0.697730409 | pseudogene       | 5  | 148924946 | 148925373                 |
| ENSG00000241115 | 11.21946611 | 11.28645558 | rRNA_pseudogen   | 21 | 15456966  | 15457502                  |
| ENSG00000241117 | 0.499066092 | 0           | tRNA_pseudogen   | 10 | 75281056  | 75281117                  |
| ENSG00000241120 | 1.16343121  | 1.16600992  | pseudogene       | 3  | 167412143 | 167412430 HMGN1P8         |
| ENSG00000241127 | 6.196276899 | 6.686500471 | protein_coding   | 7  | 39605975  | 39649919 YAE1D1           |
| ENSG00000241134 | 0           | 0.390640832 | pseudogene       | 7  | 150446824 | 150487837                 |
| ENSG00000241150 | 0.499066092 | 0.697730409 | pseudogene X     |    | 136041042 | 136103638                 |
| ENSG00000241155 | 0           | 1.925536307 | antisense        | 3  | 119033140 | 119041607 ARHGAP31-AS1    |
| ENSG00000241157 | 0.499066092 | 0.697730409 | pseudogene       | 17 | 58322649  | 58323008                  |
| ENSG00000241158 | 1.407729925 | 0.697730409 | processed_transc | 3  | 64547014  | 64572995 ADAMTS9-AS1      |
| ENSG00000241163 | 0           | 0.390640832 | processed_transc | 3  | 72084670  | 72291716                  |
| ENSG00000241169 | 0.499066092 | 0.390640832 | lincRNA          | 1  | 27783709  | 27786093                  |
| ENSG00000241170 | 4.097495944 | 4.888000647 | pseudogene       | 11 | 74587331  | 74631067                  |
| ENSG00000241173 | 0           | 0.390640832 | scRNA_pseudoge   | 2  | 62155758  | 62155827                  |
| ENSG00000241179 | 0.499066092 | 0           | pseudogene       | 5  | 134140468 | 134140822                 |
| ENSG00000241181 | 5.718698586 | 4.17820932  | processed_transc | 7  | 1583450   | 1585885                   |
| ENSG00000241188 | 0.499066092 | 0.390640832 | scRNA_pseudoge   | 1  | 27141316  | 27141598                  |
| ENSG00000241211 | 2.238690726 | 1.518964905 | antisense        | 3  | 159483176 | 159486401 IQCJ-SCHIP1-AS1 |
| ENSG00000241212 | 0.499066092 | 0           | snoRNA_pseudog   | 10 | 120827690 | 120827783                 |
| ENSG00000241217 | 2.10647801  | 2.144285137 | scRNA_pseudoge   | 12 | 57064234  | 57064530                  |

|                 |             |             |                    |           |           |                     |
|-----------------|-------------|-------------|--------------------|-----------|-----------|---------------------|
| ENSG00000241218 | 2.238690726 | 1.802319292 | pseudogene         | 3         | 107046677 | 107048044           |
| ENSG00000241219 | 0           | 0.950786998 | lincRNA            | 3         | 112769759 | 112782290           |
| ENSG00000241226 | 0.499066092 | 0           | scRNA_pseudoge     | 19        | 46154768  | 46155061            |
| ENSG00000241228 | 0.499066092 | 0.697730409 | pseudogene         | 11        | 36018776  | 36019225            |
| ENSG00000241229 | 0.499066092 | 0.950786998 | scRNA_pseudoge     | 20        | 42635888  | 42636179            |
| ENSG00000241230 | 0           | 0.390640832 | scRNA_pseudoge     | 5         | 53343838  | 53344138            |
| ENSG00000241233 | 0           | 1.16600992  | protein_coding     | 11        | 71249071  | 71250253 KRTAP5-8   |
| ENSG00000241238 | 1.407729925 | 0.950786998 | processed_transc   | 21        | 45141573  | 45152146            |
| ENSG00000241243 | 0.499066092 | 0           | scRNA_pseudoge     | 5         | 86590006  | 86590290            |
| ENSG00000241251 | 0           | 0.390640832 | pseudogene         | 12        | 43954641  | 43955100            |
| ENSG00000241255 | 1.616589159 | 1.925536307 | pseudogene         | 11        | 33258554  | 33258955            |
| ENSG00000241258 | 9.261910407 | 8.468698482 | protein_coding     | 7         | 65579591  | 65619555 CRCP       |
| ENSG00000241262 | 0.869158192 | 0.390640832 | tRNA_pseudogen     | 8         | 124270725 | 124270797 TRNAF14P  |
| ENSG00000241270 | 0.499066092 | 0.390640832 | pseudogene         | 1         | 165677520 | 165678747           |
| ENSG00000241278 | 3.146112541 | 2.971122874 | pseudogene         | 3         | 125567066 | 125628215           |
| ENSG00000241279 | 12.07500952 | 12.0586785  | rRNA_pseudogen     | 4         | 76807176  | 76807697            |
| ENSG00000241280 | 0.869158192 | 0           | lincRNA            | 3         | 101679202 | 101716770           |
| ENSG00000241288 | 4.863159938 | 4.841813558 | lincRNA            | 3         | 125581417 | 125606178           |
| ENSG00000241293 | 0           | 0.390640832 | pseudogene         | 3         | 87100342  | 87101888 PPATP1     |
| ENSG00000241301 | 0.499066092 | 0.697730409 | snoRNA_pseudog     | 10        | 88810003  | 88810077            |
| ENSG00000241307 | 0           | 0.697730409 | pseudogene         | 3         | 155478406 | 155479006           |
| ENSG00000241310 | 0           | 0.697730409 | rRNA_pseudogen     | 16        | 34980624  | 34980742            |
| ENSG00000241313 | 2.57521082  | 1.667587519 | processed_transc   | 3         | 149374807 | 149379151 WWTR1-AS1 |
| ENSG00000241316 | 3.554067925 | 4.29708397  | processed_transc   | 3         | 67705121  | 67998137            |
| ENSG00000241319 | 0.499066092 | 0.697730409 | pseudogene         | 3         | 81661389  | 81661956 SETP6      |
| ENSG00000241322 | 1.616589159 | 0.950786998 | protein_coding     | 17        | 15468798  | 15502111 CDRT1      |
| ENSG00000241333 | 5.741167503 | 5.545764946 | scRNA_pseudoge     | 22        | 38065471  | 38065746            |
| ENSG00000241343 | 7.416718478 | 7.546612122 | protein_coding X   | 100645812 | 100651106 | 100651705 RPL36A    |
| ENSG00000241351 | 0           | 0.390640832 | IG_V_gene          | 2         | 89326668  | 89327228 IGKV3-11   |
| ENSG00000241352 | 0           | 0.390640832 | pseudogene         | 12        | 13003916  | 13004671            |
| ENSG00000241354 | 0.499066092 | 0           | pseudogene         | 14        | 61068794  | 61069310            |
| ENSG00000241358 | 0           | 0.390640832 | pseudogene         | 3         | 146109150 | 146134390           |
| ENSG00000241360 | 4.165528823 | 4.274079748 | protein_coding     | 22        | 38054734  | 38062941 PDXP       |
| ENSG00000241370 | 4.517578978 | 5.32851069  | protein_coding     | 6         | 30312908  | 30314661 RPP21      |
| ENSG00000241371 | 0.499066092 | 0           | rRNA_pseudogen     | 6         | 43720580  | 43720688            |
| ENSG00000241376 | 11.01222327 | 11.0956623  | rRNA_pseudogen     | 6         | 120583432 | 120583547           |
| ENSG00000241388 | 0.499066092 | 0           | antisense          | 12        | 121406416 | 121418768 HNF1A-AS1 |
| ENSG00000241396 | 0.869158192 | 0           | tRNA_pseudogen     | 1         | 161390661 | 161390733           |
| ENSG00000241399 | 3.830412367 | 2.912743273 | protein_coding     | 2         | 160625364 | 160654753 CD302     |
| ENSG00000241404 | 4.568725997 | 4.976162367 | protein_coding     | 6         | 32132360  | 32136058 EGFL8      |
| ENSG00000241409 | 0           | 0.697730409 | processed_transc   | 2         | 233624856 | 233632659           |
| ENSG00000241411 | 0.499066092 | 0.950786998 | pseudogene         | 4         | 135873414 | 135874044           |
| ENSG00000241413 | 0.499066092 | 0           | scRNA_pseudoge     | 12        | 110304026 | 110304314           |
| ENSG00000241416 | 0.869158192 | 1.353254395 | pseudogene         | 3         | 170213416 | 170214425 KRT8P13   |
| ENSG00000241418 | 1.407729925 | 0.950786998 | pseudogene X       | 130929685 | 130930195 |                     |
| ENSG00000241420 | 1.16343121  | 0.390640832 | scRNA_pseudoge     | 7         | 33085410  | 33085702            |
| ENSG00000241429 | 0.499066092 | 1.353254395 | pseudogene         | 3         | 138543905 | 138545171 EEF1A1P25 |
| ENSG00000241431 | 3.830412367 | 4.048652948 | pseudogene         | 8         | 57500944  | 57501346            |
| ENSG00000241438 | 0.869158192 | 0.697730409 | pseudogene         | 3         | 135874391 | 135874838 TDGF1P6   |
| ENSG00000241449 | 0.499066092 | 0           | lincRNA            | 7         | 149737610 | 149773744           |
| ENSG00000241456 | 0.499066092 | 0.390640832 | antisense          | 7         | 151124769 | 151136210           |
| ENSG00000241458 | 0.869158192 | 0.950786998 | pseudogene         | 5         | 137809433 | 137810050           |
| ENSG00000241463 | 0           | 0.390640832 | rRNA_pseudogen     | 16        | 34983941  | 34984034            |
| ENSG00000241464 | 1.407729925 | 0.390640832 | pseudogene         | 19        | 18396153  | 18396306            |
| ENSG00000241468 | 8.823839897 | 9.086540754 | protein_coding     | 7         | 99046098  | 99063954 ATP5J2     |
| ENSG00000241472 | 3.652182994 | 3.232099092 | processed_transc   | 3         | 62247498  | 62355005            |
| ENSG00000241473 | 0           | 0.390640832 | pseudogene         | 3         | 180538332 | 180539400           |
| ENSG00000241475 | 1.16343121  | 0           | processed_transc   | 1         | 234796017 | 234802850           |
| ENSG00000241478 | 1.407729925 | 1.353254395 | pseudogene         | 3         | 137599137 | 137601079           |
| ENSG00000241481 | 2.10647801  | 2.652276565 | lincRNA            | 2         | 98086678  | 98100408            |
| ENSG00000241482 | 12.07542405 | 12.11356942 | rRNA_pseudogen     | 2         | 203210989 | 203211097           |
| ENSG00000241484 | 5.270908378 | 0.390640832 | protein_coding     | 22        | 45098355  | 45258665 ARHGAP8    |
| ENSG00000241489 | 3.502389126 | 3.608232228 | processed_transc X | 148564621 | 148614672 |                     |

|                 |             |             |                    |           |           |                      |
|-----------------|-------------|-------------|--------------------|-----------|-----------|----------------------|
| ENSG00000241493 | 0.869158192 | 0           | pseudogene         | 7         | 128309141 | 128309946            |
| ENSG00000241494 | 4.165528823 | 4.777836593 | pseudogene         | 14        | 102144280 | 102144717            |
| ENSG00000241499 | 0.499066092 | 0.697730409 | pseudogene         | 14        | 93710356  | 93710669             |
| ENSG00000241506 | 2.762599152 | 1.667587519 | pseudogene         | 3         | 68684856  | 68686175 PSMC1P1     |
| ENSG00000241511 | 1.16343121  | 0.697730409 | pseudogene         | 8         | 29974900  | 29975295 RPS15AP24   |
| ENSG00000241520 | 0.869158192 | 1.518964905 | antisense          | 2         | 217347755 | 217351919            |
| ENSG00000241527 | 3.989024711 | 3.532712221 | pseudogene         | 22        | 19019077  | 19022077             |
| ENSG00000241528 | 3.652182994 | 4.903073497 | processed_transc   | 22        | 30770930  | 30773862             |
| ENSG00000241529 | 2.57521082  | 2.144285137 | scRNA_pseudoge     | 3         | 113351551 | 113351746            |
| ENSG00000241530 | 13.07960281 | 13.18023035 | rRNA_pseudogen     | 2         | 230045488 | 230045666            |
| ENSG00000241532 | 0           | 0.390640832 | pseudogene         | 3         | 75702712  | 75703924 AGGF1P3     |
| ENSG00000241535 | 0.869158192 | 0.697730409 | pseudogene         | 3         | 88144558  | 88145118 CBX5P1      |
| ENSG00000241537 | 0           | 0.390640832 | pseudogene         | 3         | 72821690  | 72822622             |
| ENSG00000241539 | 0.499066092 | 0.390640832 | pseudogene         | 7         | 6963709   | 6964144              |
| ENSG00000241542 | 0           | 0.390640832 | scRNA_pseudoge     | 14        | 68172673  | 68172969             |
| ENSG00000241544 | 1.16343121  | 0.390640832 | processed_transc   | 3         | 156799630 | 156806336            |
| ENSG00000241546 | 0           | 0.390640832 | pseudogene         | 3         | 119760037 | 119760384            |
| ENSG00000241547 | 3.077135474 | 2.912743273 | pseudogene         | 1         | 27651820  | 27652287             |
| ENSG00000241549 | 3.554067925 | 3.813624741 | pseudogene         | 6         | 26839263  | 26924333 GUSBP2      |
| ENSG00000241553 | 9.557686483 | 9.14238723  | protein_coding     | 3         | 9834179   | 9855035 ARPC4        |
| ENSG00000241556 | 0.869158192 | 0           | pseudogene         | 12        | 95861173  | 95861637             |
| ENSG00000241560 | 0           | 1.16600992  | antisense          | 3         | 114070658 | 114107825 ZBTB20-AS1 |
| ENSG00000241563 | 2.762599152 | 2.144285137 | protein_coding     | 1         | 10509776  | 10511959 CORT        |
| ENSG00000241568 | 0.499066092 | 0           | scRNA_pseudoge     | 9         | 35049268  | 35049560             |
| ENSG00000241570 | 1.407729925 | 2.144285137 | antisense          | 3         | 142682900 | 142719932            |
| ENSG00000241580 | 0           | 0.390640832 | scRNA_pseudoge     | 12        | 49560794  | 49560938             |
| ENSG00000241582 | 0.869158192 | 0.390640832 | pseudogene         | 14        | 35163376  | 35163850             |
| ENSG00000241593 | 2.471521042 | 0.950786998 | lincRNA            | 3         | 81295730  | 81346496             |
| ENSG00000241599 | 1.16343121  | 1.518964905 | lincRNA            | 1         | 160446    | 161525               |
| ENSG00000241612 | 0.499066092 | 0.390640832 | pseudogene         | 4         | 19815372  | 19815854             |
| ENSG00000241621 | 0           | 0.390640832 | pseudogene         | 10        | 30653339  | 30663315             |
| ENSG00000241622 | 0           | 0.390640832 | pseudogene         | 3         | 75707685  | 75708165             |
| ENSG00000241627 | 1.407729925 | 2.144285137 | pseudogene         | 3         | 148703655 | 148705455 UBQLN4P1   |
| ENSG00000241634 | 3.393122761 | 3.87606762  | pseudogene         | 3         | 108262214 | 108262722            |
| ENSG00000241640 | 0           | 0.390640832 | pseudogene         | 15        | 59341598  | 59342585             |
| ENSG00000241641 | 0.499066092 | 0.697730409 | pseudogene         | 16        | 12175094  | 12175759 RPS23P6     |
| ENSG00000241644 | 1.616589159 | 0.390640832 | protein_coding     | 7         | 30737601  | 30797218 INMT        |
| ENSG00000241651 | 0.499066092 | 0           | pseudogene         | 4         | 128990169 | 128990767            |
| ENSG00000241661 | 0.499066092 | 0           | pseudogene         | 7         | 139992552 | 139993139 PPP1R2P6   |
| ENSG00000241668 | 0           | 0.390640832 | pseudogene         | 5         | 31053672  | 31054260             |
| ENSG00000241680 | 0.499066092 | 0.697730409 | pseudogene         | 12        | 110898793 | 110899167 RPL31P49   |
| ENSG00000241684 | 2.35979773  | 0.950786998 | processed_transc   | 3         | 64670585  | 64997143 ADAMTS9-AS2 |
| ENSG00000241685 | 10.84530541 | 10.18609153 | protein_coding     | 7         | 98923521  | 98985787 ARPC1A      |
| ENSG00000241693 | 0.499066092 | 0.697730409 | scRNA_pseudoge     | 22        | 38627727  | 38628006             |
| ENSG00000241697 | 1.616589159 | 2.579085888 | protein_coding     | 9         | 103204560 | 103339918 TMEFF1     |
| ENSG00000241708 | 0           | 0.390640832 | scRNA_pseudoge     | 17        | 8450233   | 8450526              |
| ENSG00000241720 | 0.869158192 | 0           | processed_transc   | 1         | 110230450 | 110318050            |
| ENSG00000241721 | 0.499066092 | 0           | pseudogene         | 20        | 52491791  | 52492096 SUMO1P1     |
| ENSG00000241733 | 0           | 0.390640832 | snRNA_pseudoge     | 17        | 19751382  | 19751437             |
| ENSG00000241735 | 0.869158192 | 0.697730409 | pseudogene         | 7         | 152133980 | 152140272 FABP5P3    |
| ENSG00000241738 | 0.869158192 | 1.518964905 | pseudogene         | 3         | 101076136 | 101078086 ZNF90P1    |
| ENSG00000241741 | 2.57521082  | 3.183544561 | pseudogene         | 4         | 113709239 | 113710034            |
| ENSG00000241746 | 1.407729925 | 0.697730409 | pseudogene         | 8         | 81177763  | 81178390             |
| ENSG00000241749 | 4.923348194 | 2.788380093 | pseudogene         | 12        | 66151800  | 66220777 RPSAP52     |
| ENSG00000241760 | 0           | 0.390640832 | tRNA_pseudogen     | 11        | 68227616  | 68227687             |
| ENSG00000241762 | 0           | 0.950786998 | processed_transc   | 19        | 36195461  | 36204444             |
| ENSG00000241764 | 1.407729925 | 1.518964905 | processed_transc   | 7         | 107383262 | 107385026            |
| ENSG00000241765 | 0.499066092 | 0           | pseudogene         | 12        | 69816441  | 69816772             |
| ENSG00000241768 | 2.471521042 | 3.027231696 | lincRNA            | 1         | 740179    | 745440               |
| ENSG00000241769 | 2.238690726 | 2.144285137 | processed_transc X | 148614831 | 148622358 |                      |
| ENSG00000241770 | 0.499066092 | 0.390640832 | antisense          | 3         | 156881241 | 156886922            |
| ENSG00000241781 | 11.74283304 | 11.76945734 | rRNA_pseudogen     | 9         | 79186649  | 79186950             |
| ENSG00000241782 | 0.869158192 | 1.16600992  | pseudogene         | 11        | 77579768  | 77580241             |

|                 |             |             |                    |    |           |                     |
|-----------------|-------------|-------------|--------------------|----|-----------|---------------------|
| ENSG00000241784 | 1.616589159 | 1.802319292 | antisense          | 1  | 43302603  | 43312033            |
| ENSG00000241785 | 0           | 0.390640832 | scRNA_pseudoge     | 12 | 54649411  | 54649693            |
| ENSG00000241787 | 0.869158192 | 0           | pseudogene         | 3  | 106613199 | 106614565 MTND4P16  |
| ENSG00000241789 | 0           | 0.697730409 | scRNA_pseudoge     | 3  | 51906267  | 51906480            |
| ENSG00000241794 | 1.407729925 | 0           | protein_coding     | 1  | 153028589 | 153030013 SPRR2A    |
| ENSG00000241800 | 1.799000381 | 2.242360793 | Mt_tRNA_pseudc     | 1  | 567996    | 568067              |
| ENSG00000241802 | 0.499066092 | 0           | tRNA_pseudogen     | 1  | 149287359 | 149287430 TRNAF17P  |
| ENSG00000241810 | 0.499066092 | 0.390640832 | pseudogene         | 3  | 152785067 | 152785340 HMG2P13   |
| ENSG00000241812 | 0.499066092 | 0.697730409 | pseudogene         | 19 | 8839097   | 8839566             |
| ENSG00000241818 | 0.499066092 | 0.697730409 | antisense          | 15 | 32948285  | 32965266            |
| ENSG00000241825 | 0.499066092 | 0.697730409 | pseudogene         | 12 | 69078375  | 69080085            |
| ENSG00000241829 | 0           | 1.16600992  | pseudogene         | 5  | 34883162  | 34883625 RPL21P54   |
| ENSG00000241830 | 0.869158192 | 0           | rRNA_pseudogen     | 5  | 10374042  | 10375088            |
| ENSG00000241836 | 3.448790144 | 4.127774132 | processed_transc   | 2  | 217364673 | 217394207           |
| ENSG00000241837 | 8.280649185 | 8.742412084 | protein_coding     | 21 | 35275757  | 35288284 ATP5O      |
| ENSG00000241839 | 7.572060955 | 8.188649093 | protein_coding     | 15 | 65134088  | 65160206 PLEKHO2    |
| ENSG00000241847 | 1.799000381 | 1.667587519 | pseudogene         | 6  | 143811652 | 143812504           |
| ENSG00000241852 | 6.693459083 | 7.289906366 | protein_coding     | 8  | 22457114  | 22461663 C8orf58    |
| ENSG00000241860 | 4.568725997 | 3.532712221 | antisense          | 1  | 141474    | 149707              |
| ENSG00000241865 | 1.16343121  | 2.144285137 | pseudogene         | 17 | 76842032  | 76842950            |
| ENSG00000241868 | 0           | 0.697730409 | scRNA_pseudoge     | 3  | 196124386 | 196124649           |
| ENSG00000241877 | 0.869158192 | 1.518964905 | pseudogene         | 4  | 179207849 | 179208439           |
| ENSG00000241878 | 10.06589555 | 10.50599904 | protein_coding     | 22 | 32014477  | 32058418 PISD       |
| ENSG00000241884 | 0           | 0.390640832 | lincRNA            | 3  | 67346724  | 67356783            |
| ENSG00000241886 | 1.407729925 | 2.334191469 | processed_transc X |    | 30716324  | 30740049            |
| ENSG00000241889 | 2.238690726 | 1.925536307 | pseudogene         | 3  | 113604145 | 113604878           |
| ENSG00000241890 | 0.499066092 | 0.950786998 | pseudogene         | 15 | 75680608  | 75681169 RPL13P4    |
| ENSG00000241902 | 1.407729925 | 0.697730409 | scRNA_pseudoge     | 19 | 17338097  | 17338197            |
| ENSG00000241903 | 0           | 0.697730409 | tRNA_pseudogen     | 3  | 17741392  | 17741464 TRNAC31P   |
| ENSG00000241907 | 1.407729925 | 1.16600992  | pseudogene         | 5  | 149401130 | 149401484           |
| ENSG00000241912 | 0           | 0.390640832 | lincRNA            | 3  | 153094620 | 153095351           |
| ENSG00000241923 | 0.869158192 | 1.518964905 | pseudogene         | 4  | 141287394 | 141288015           |
| ENSG00000241933 | 0           | 0.950786998 | processed_transc   | 3  | 57678932  | 57682323            |
| ENSG00000241935 | 2.35979773  | 2.912743273 | protein_coding     | 10 | 99344080  | 99372559 HOGA1      |
| ENSG00000241942 | 0.499066092 | 0           | pseudogene         | 8  | 72808226  | 72808562 RPS20P20   |
| ENSG00000241945 | 9.31529953  | 9.222677059 | protein_coding     | 21 | 45527176  | 45551063 PWP2       |
| ENSG00000241954 | 1.407729925 | 1.353254395 | antisense          | 22 | 32779773  | 32781618            |
| ENSG00000241955 | 0           | 0.697730409 | Mt_tRNA_pseudc     | 2  | 120972637 | 120972694           |
| ENSG00000241957 | 3.603959378 | 2.912743273 | scRNA_pseudoge     | 20 | 36726862  | 36727102            |
| ENSG00000241959 | 0.869158192 | 0.390640832 | scRNA_pseudoge     | 7  | 151161737 | 151162023           |
| ENSG00000241962 | 2.762599152 | 2.652276565 | protein_coding     | 2  | 99757948  | 99939204 C2orf15    |
| ENSG00000241973 | 10.08358792 | 10.4139632  | protein_coding     | 22 | 21061979  | 21213705 PI4KA      |
| ENSG00000241975 | 1.407729925 | 1.16600992  | pseudogene         | 1  | 89294785  | 89295102 TCEB1P19   |
| ENSG00000241978 | 3.393122761 | 3.32456471  | protein_coding     | 9  | 112542769 | 112934792 AKAP2     |
| ENSG00000241981 | 0           | 0.697730409 | pseudogene         | 4  | 103583768 | 103584230           |
| ENSG00000241983 | 0           | 0.950786998 | scRNA_pseudoge     | 19 | 39859790  | 39860088            |
| ENSG00000241984 | 1.407729925 | 1.353254395 | pseudogene         | 14 | 39625946  | 39627056            |
| ENSG00000241985 | 1.960915222 | 0.950786998 | sense_intronic     | 3  | 149366784 | 149367971 WWTR1-IT1 |
| ENSG00000241988 | 3.911897206 | 3.027231696 | Mt_tRNA_pseudc     | 5  | 93905172  | 93905240            |
| ENSG00000241990 | 4.689181911 | 5.306006045 | processed_transc   | 22 | 46449585  | 46453090            |
| ENSG00000241991 | 0.499066092 | 0.390640832 | pseudogene         | 5  | 61857686  | 61858043            |
| ENSG00000242006 | 0           | 0.390640832 | Mt_tRNA_pseudc X   |    | 102062821 | 102062873           |
| ENSG00000242009 | 0           | 0.390640832 | lincRNA            | 3  | 81889698  | 81972012            |
| ENSG00000242010 | 0.499066092 | 0           | processed_transc   | 9  | 108148969 | 108158299           |
| ENSG00000242013 | 5.625150983 | 5.700439663 | pseudogene X       |    | 49644470  | 49647166            |
| ENSG00000242017 | 0.869158192 | 1.353254395 | pseudogene         | 3  | 155761944 | 155762737           |
| ENSG00000242020 | 0           | 0.390640832 | scRNA_pseudoge     | 5  | 140858883 | 140859192           |
| ENSG00000242021 | 0.869158192 | 2.144285137 | lincRNA X          |    | 27177022  | 27194415            |
| ENSG00000242024 | 0           | 0.390640832 | scRNA_pseudoge     | 3  | 128392525 | 128392864           |
| ENSG00000242026 | 0           | 0.390640832 | pseudogene         | 6  | 26866490  | 26867376            |
| ENSG00000242028 | 4.062237333 | 3.845183986 | protein_coding     | 15 | 44088340  | 44095241 C15orf63   |
| ENSG00000242048 | 1.16343121  | 0           | antisense          | 7  | 151503744 | 151507558           |
| ENSG00000242056 | 0           | 0.390640832 | Mt_tRNA_pseudc X   |    | 102041672 | 102041740           |

|                 |             |             |                  |    |           |           |           |
|-----------------|-------------|-------------|------------------|----|-----------|-----------|-----------|
| ENSG00000242058 | 0           | 0.390640832 | pseudogene       | 18 | 9020019   | 9020765   |           |
| ENSG00000242060 | 1.407729925 | 2.652276565 | pseudogene       | 18 | 57816808  | 57817597  |           |
| ENSG00000242062 | 0.499066092 | 0.390640832 | pseudogene       | 3  | 128570955 | 128571851 | MARK2P6   |
| ENSG00000242068 | 0.499066092 | 0.950786998 | pseudogene       | 3  | 180490538 | 180491702 |           |
| ENSG00000242071 | 3.989024711 | 4.363974406 | pseudogene       | 14 | 70352057  | 70352869  | RPL7AP6   |
| ENSG00000242078 | 0.499066092 | 0.950786998 | lincRNA          | 7  | 129423210 | 129425025 |           |
| ENSG00000242082 | 2.471521042 | 2.788380093 | processed_transc | 22 | 32601102  | 32665653  |           |
| ENSG00000242085 | 3.077135474 | 2.501982735 | pseudogene       | 14 | 105840955 | 105841308 | RPS20P33  |
| ENSG00000242086 | 5.879259127 | 5.283144778 | processed_transc | 3  | 195415518 | 195451630 |           |
| ENSG00000242087 | 0.499066092 | 0.390640832 | pseudogene       | 12 | 64265522  | 64265824  |           |
| ENSG00000242088 | 0           | 0.697730409 | pseudogene       | 15 | 25156021  | 25156272  |           |
| ENSG00000242094 | 0           | 2.144285137 | sense_intronic   | 3  | 71619406  | 71623608  | FOXP1-IT1 |
| ENSG00000242095 | 1.407729925 | 1.518964905 | scRNA_pseudoge   | 2  | 85595405  | 85595703  |           |
| ENSG00000242100 | 0.869158192 | 0.950786998 | pseudogene       | 19 | 30447319  | 30447895  |           |
| ENSG00000242104 | 0.869158192 | 0.390640832 | lincRNA          | 3  | 141382041 | 141439915 |           |
| ENSG00000242110 | 4.689181911 | 5.059245468 | protein_coding   | 5  | 33986283  | 34008220  | AMACR     |
| ENSG00000242114 | 5.763291843 | 6.470782801 | protein_coding   | 22 | 30821518  | 30825045  | MTFP1     |
| ENSG00000242125 | 10.11080508 | 9.794762494 | processed_transc | 1  | 28832492  | 28837404  | SNHG3     |
| ENSG00000242136 | 1.616589159 | 0           | processed_transc | 2  | 9243569   | 9245243   |           |
| ENSG00000242142 | 0.499066092 | 0.697730409 | pseudogene       | 3  | 53098299  | 53099107  |           |
| ENSG00000242147 | 3.78787645  | 1.667587519 | lincRNA          | 10 | 5636954   | 5638081   |           |
| ENSG00000242154 | 1.16343121  | 0           | antisense        | 7  | 104944724 | 104947089 |           |
| ENSG00000242159 | 0           | 0.390640832 | pseudogene       | 3  | 88366306  | 88368172  |           |
| ENSG00000242162 | 0.499066092 | 0.697730409 | pseudogene       | 7  | 128706075 | 128706516 |           |
| ENSG00000242163 | 0.499066092 | 0           | pseudogene       | 14 | 81799305  | 81799705  |           |
| ENSG00000242169 | 0.499066092 | 1.16600992  | pseudogene       | 4  | 189270578 | 189271178 |           |
| ENSG00000242173 | 1.616589159 | 1.16600992  | protein_coding   | 16 | 318726    | 333003    | ARHGDI3   |
| ENSG00000242175 | 0           | 1.16600992  | scRNA_pseudoge   | 4  | 79820010  | 79820308  |           |
| ENSG00000242179 | 0           | 0.390640832 | rRNA_pseudogen   | 8  | 56821654  | 56822036  |           |
| ENSG00000242182 | 0           | 0.390640832 | scRNA_pseudoge   | 18 | 20584522  | 20584825  |           |
| ENSG00000242193 | 6.155035276 | 5.6022688   | pseudogene       | 1  | 177975271 | 178007085 |           |
| ENSG00000242198 | 1.960915222 | 1.16600992  | pseudogene       | 5  | 74670288  | 74670634  |           |
| ENSG00000242199 | 0.869158192 | 1.667587519 | pseudogene       | 3  | 124452265 | 124452601 |           |
| ENSG00000242208 | 1.407729925 | 1.518964905 | pseudogene       | 11 | 56124804  | 56125697  | RPL5P29   |
| ENSG00000242209 | 0           | 0.390640832 | pseudogene       | 4  | 13649321  | 13650024  |           |
| ENSG00000242212 | 0           | 0.390640832 | scRNA_pseudoge   | 16 | 4708852   | 4709152   |           |
| ENSG00000242215 | 2.671945279 | 2.912743273 | pseudogene       | 9  | 19276173  | 19336492  |           |
| ENSG00000242219 | 1.799000381 | 1.353254395 | scRNA_pseudoge   | 19 | 11122384  | 11122682  |           |
| ENSG00000242220 | 2.238690726 | 2.420525079 | protein_coding   | 21 | 33948862  | 33957843  | TCP10L    |
| ENSG00000242221 | 1.616589159 | 3.232099092 | protein_coding   | 19 | 43568363  | 43568820  | PSG2      |
| ENSG00000242236 | 0           | 0.697730409 | scRNA_pseudoge   | 20 | 25635232  | 25635517  |           |
| ENSG00000242242 | 1.16343121  | 3.87606762  | antisense        | 3  | 110612555 | 110790400 | PVRL3-AS1 |
| ENSG00000242247 | 9.188186835 | 9.554600493 | protein_coding   | 22 | 43192508  | 43267429  | ARFGAP3   |
| ENSG00000242251 | 0           | 0.390640832 | scRNA_pseudoge   | 22 | 32153188  | 32153484  |           |
| ENSG00000242252 | 1.960915222 | 2.721932731 | protein_coding   | 1  | 156211753 | 156213112 | BGLAP     |
| ENSG00000242256 | 0.499066092 | 0.390640832 | scRNA_pseudoge   | 9  | 115004830 | 115005119 |           |
| ENSG00000242257 | 8.243750574 | 7.869875863 | rRNA_pseudogen   | 11 | 45848153  | 45848297  |           |
| ENSG00000242258 | 5.018397273 | 5.32851069  | processed_transc | 7  | 150130742 | 150145228 |           |
| ENSG00000242259 | 6.343050432 | 6.535085617 | protein_coding   | 22 | 19338891  | 19435755  | C22orf39  |
| ENSG00000242261 | 5.929039784 | 4.990346085 | pseudogene       | 7  | 127946702 | 127947731 |           |
| ENSG00000242262 | 0.869158192 | 0.697730409 | pseudogene       | 4  | 47708389  | 47709004  |           |
| ENSG00000242265 | 11.8552501  | 9.248723012 | protein_coding   | 7  | 94285637  | 94299007  | PEG10     |
| ENSG00000242267 | 0           | 0.950786998 | pseudogene       | 1  | 48630301  | 48648100  |           |
| ENSG00000242272 | 1.960915222 | 0           | pseudogene       | 2  | 32048482  | 32048886  | AK2P2     |
| ENSG00000242276 | 0.499066092 | 0.950786998 | pseudogene       | 15 | 71355440  | 71356328  | RPL5P3    |
| ENSG00000242282 | 3.830412367 | 3.993387124 | processed_transc | 2  | 3579403   | 3584463   |           |
| ENSG00000242284 | 1.16343121  | 0.950786998 | protein_coding   | X  | 134944381 | 134953994 | CT45A5    |
| ENSG00000242288 | 3.502389126 | 2.912743273 | processed_transc | 10 | 75434053  | 75490272  |           |
| ENSG00000242290 | 0           | 0.390640832 | lincRNA          | 3  | 114172440 | 114238979 |           |
| ENSG00000242294 | 2.10647801  | 2.144285137 | pseudogene       | 7  | 99933748  | 99938951  |           |
| ENSG00000242297 | 0.869158192 | 0           | scRNA_pseudoge   | 8  | 11000760  | 11000848  |           |
| ENSG00000242299 | 3.871730003 | 4.508954154 | pseudogene       | 3  | 101295333 | 101295791 |           |
| ENSG00000242307 | 0.869158192 | 0.697730409 | pseudogene       | 16 | 14016189  | 14016536  |           |



|                 |             |             |                  |    |           |                    |
|-----------------|-------------|-------------|------------------|----|-----------|--------------------|
| ENSG00000242308 | 0           | 0.390640832 | pseudogene       | 3  | 112415755 | 112416553          |
| ENSG00000242311 | 0.499066092 | 0.950786998 | scRNA_pseudoge   | 10 | 104285744 | 104286003          |
| ENSG00000242314 | 0.869158192 | 0.950786998 | pseudogene       | 12 | 32101268  | 32101761           |
| ENSG00000242318 | 0           | 0.390640832 | pseudogene       | 4  | 99330441  | 99330914           |
| ENSG00000242325 | 0.869158192 | 0.390640832 | pseudogene       | 19 | 33126984  | 33127381           |
| ENSG00000242327 | 0.869158192 | 1.353254395 | pseudogene       | 15 | 52387492  | 52387944           |
| ENSG00000242330 | 0           | 0.390640832 | scRNA_pseudoge   | 14 | 71915406  | 71915675           |
| ENSG00000242337 | 0.499066092 | 0.950786998 | pseudogene       | 3  | 133380842 | 133473420 TFP1     |
| ENSG00000242338 | 0.869158192 | 0.697730409 | pseudogene       | 10 | 75476873  | 75488338 BMS1P4    |
| ENSG00000242343 | 0.499066092 | 0.390640832 | scRNA_pseudoge   | 14 | 81668791  | 81669006           |
| ENSG00000242349 | 4.923348194 | 4.94736961  | antisense        | 1  | 11901074  | 11908136 NPPA-AS1  |
| ENSG00000242355 | 0.869158192 | 0.950786998 | scRNA_pseudoge   | 2  | 201962467 | 201962814          |
| ENSG00000242357 | 0.499066092 | 0.390640832 | processed_transc | 10 | 709498    | 712562             |
| ENSG00000242358 | 2.35979773  | 1.518964905 | pseudogene       | 4  | 16257931  | 16258178           |
| ENSG00000242372 | 10.82704081 | 11.52512084 | protein_coding   | 20 | 33866714  | 33872788 EIF6      |
| ENSG00000242391 | 1.407729925 | 1.667587519 | processed_transc | 1  | 53346888  | 53347402           |
| ENSG00000242398 | 0.499066092 | 0.390640832 | scRNA_pseudoge   | 17 | 60083098  | 60083331           |
| ENSG00000242400 | 0           | 0.390640832 | scRNA_pseudoge   | 18 | 21759005  | 21759255           |
| ENSG00000242405 | 0.499066092 | 1.518964905 | pseudogene       | 12 | 12308196  | 12308703           |
| ENSG00000242411 | 0           | 0.697730409 | pseudogene       | 19 | 56728537  | 56729148           |
| ENSG00000242419 | 2.238690726 | 1.802319292 | protein_coding   | 5  | 140864741 | 140892546 PCDHGC4  |
| ENSG00000242421 | 0.499066092 | 0           | scRNA_pseudoge   | 2  | 97766328  | 97766611           |
| ENSG00000242429 | 0.869158192 | 0.390640832 | pseudogene       | 17 | 35519530  | 35520053           |
| ENSG00000242431 | 0           | 0.390640832 | pseudogene       | 4  | 47492984  | 47493488           |
| ENSG00000242439 | 0.499066092 | 0           | pseudogene       | 17 | 29157919  | 29158336           |
| ENSG00000242445 | 2.10647801  | 1.16600992  | pseudogene       | 3  | 121212957 | 121213755 RPL7AP11 |
| ENSG00000242457 | 0.499066092 | 1.353254395 | pseudogene       | 3  | 93794756  | 93796019 RBBP4P2   |
| ENSG00000242463 | 0.499066092 | 0.390640832 | scRNA_pseudoge   | 22 | 50809639  | 50809925           |
| ENSG00000242474 | 3.603959378 | 3.748356452 | lincRNA          | 7  | 135853    | 149466             |
| ENSG00000242477 | 1.960915222 | 2.039052734 | pseudogene       | 5  | 86180048  | 86180698           |
| ENSG00000242481 | 3.274897671 | 3.493416095 | rRNA_pseudogen   | 10 | 115463415 | 115463578          |
| ENSG00000242485 | 8.135536446 | 8.309531754 | protein_coding   | 1  | 1337288   | 1342693 MRPL20     |
| ENSG00000242488 | 0           | 1.16600992  | pseudogene       | 14 | 76304468  | 76305457           |
| ENSG00000242498 | 7.921045056 | 7.752033772 | protein_coding   | 15 | 90443159  | 90456188 C15orf38  |
| ENSG00000242507 | 0.499066092 | 1.925536307 | pseudogene       | 20 | 34108569  | 34117481           |
| ENSG00000242510 | 0           | 0.390640832 | pseudogene       | 3  | 67564364  | 67564744           |
| ENSG00000242516 | 4.642199401 | 5.974624386 | processed_transc | 3  | 75721542  | 75728454           |
| ENSG00000242526 | 0           | 0.390640832 | Mt_tRNA_pseudc   | 7  | 141501873 | 141501938          |
| ENSG00000242527 | 0           | 0.950786998 | pseudogene       | 11 | 27505397  | 27505675           |
| ENSG00000242531 | 0           | 0.390640832 | pseudogene       | 3  | 122135729 | 122135859          |
| ENSG00000242539 | 6.541724534 | 6.210997888 | antisense        | 3  | 179115405 | 179116506          |
| ENSG00000242550 | 0.499066092 | 0           | protein_coding   | 18 | 61564408  | 61603345 SERPINB10 |
| ENSG00000242551 | 0.499066092 | 0.390640832 | pseudogene       | 3  | 128393578 | 128395848 POU5F1P6 |
| ENSG00000242553 | 2.10647801  | 3.279072565 | processed_transc | 21 | 38593720  | 38610045           |
| ENSG00000242557 | 0.869158192 | 1.667587519 | processed_transc | 1  | 151031995 | 151042801          |
| ENSG00000242559 | 0.499066092 | 0.697730409 | scRNA_pseudoge X |    | 41542421  | 41542719           |
| ENSG00000242562 | 0.499066092 | 0           | pseudogene       | 7  | 105765817 | 105767146          |
| ENSG00000242569 | 1.407729925 | 1.518964905 | lincRNA          | 1  | 143347958 | 143379903          |
| ENSG00000242572 | 0.499066092 | 0           | rRNA_pseudogen   | 7  | 99065860  | 99066197           |
| ENSG00000242574 | 2.10647801  | 1.925536307 | protein_coding   | 6  | 32902406  | 32908847 HLA-DMB   |
| ENSG00000242575 | 1.616589159 | 1.16600992  | pseudogene       | 2  | 154277191 | 154278471          |
| ENSG00000242578 | 0.499066092 | 0           | lincRNA          | 3  | 170128300 | 170136403          |
| ENSG00000242585 | 0.499066092 | 0.390640832 | scRNA_pseudoge   | 16 | 3684835   | 3685119            |
| ENSG00000242588 | 4.863159938 | 4.976162367 | pseudogene       | 7  | 128173706 | 128256024          |
| ENSG00000242597 | 0           | 0.697730409 | rRNA_pseudogen   | 10 | 68805211  | 68805467           |
| ENSG00000242602 | 0           | 0.697730409 | pseudogene       | 5  | 72174695  | 72175012           |
| ENSG00000242604 | 0           | 0.390640832 | rRNA_pseudogen   | 1  | 120543874 | 120544125          |
| ENSG00000242607 | 0.869158192 | 0.697730409 | pseudogene       | 8  | 12427859  | 12428639 RPS3AP34  |
| ENSG00000242611 | 1.407729925 | 0.390640832 | lincRNA          | 7  | 77038     | 80418              |
| ENSG00000242612 | 7.878603882 | 7.879433769 | protein_coding   | 16 | 451826    | 462487 DECR2       |
| ENSG00000242615 | 4.821592551 | 5.187895122 | pseudogene       | 19 | 12252621  | 12254137           |
| ENSG00000242616 | 5.613019223 | 5.163066621 | protein_coding   | 9  | 114423615 | 114432504 GNG10    |
| ENSG00000242618 | 0           | 0.390640832 | lincRNA          | 3  | 72252095  | 72259043           |

|                 |             |             |                  |    |           |           |
|-----------------|-------------|-------------|------------------|----|-----------|-----------|
| ENSG00000242620 | 0.499066092 | 0           | scRNA_pseudoge   | 15 | 90837247  | 90837408  |
| ENSG00000242622 | 3.652182994 | 3.183544561 | processed_transc | 3  | 119813742 | 119855630 |
| ENSG00000242626 | 0           | 0.697730409 | Mt_tRNA_pseudc   | 16 | 82155379  | 82155447  |
| ENSG00000242628 | 0           | 0.390640832 | antisense        | 2  | 24437250  | 24444385  |
| ENSG00000242629 | 4.131913373 | 3.845183986 | processed_transc | 10 | 11605186  | 11615495  |
| ENSG00000242639 | 0.869158192 | 0.950786998 | processed_transc | 10 | 46088878  | 46090046  |
| ENSG00000242659 | 0.869158192 | 0.390640832 | lincRNA          | 3  | 113465719 | 113466255 |
| ENSG00000242660 | 0           | 0.390640832 | pseudogene       | 17 | 33893536  | 33893691  |
| ENSG00000242661 | 0           | 0.697730409 | pseudogene       | 12 | 8511650   | 8512430   |
| ENSG00000242663 | 0.499066092 | 0.390640832 | processed_transc | 1  | 149754433 | 149783312 |
| ENSG00000242667 | 2.35979773  | 2.144285137 | pseudogene       | 15 | 60696662  | 60697159  |
| ENSG00000242670 | 0           | 0.390640832 | pseudogene       | 4  | 55087293  | 55087639  |
| ENSG00000242675 | 0           | 0.697730409 | pseudogene       | 19 | 45835956  | 45836382  |
| ENSG00000242677 | 0           | 0.390640832 | scRNA_pseudoge   | 2  | 3426729   | 3426954   |
| ENSG00000242680 | 2.471521042 | 2.788380093 | Mt_tRNA_pseudc   | 14 | 32954083  | 32954148  |
| ENSG00000242681 | 0.499066092 | 0           | snRNA_pseudoge   | 1  | 75188120  | 75188216  |
| ENSG00000242687 | 5.346128795 | 4.976162367 | antisense        | 7  | 98610788  | 98645863  |
| ENSG00000242689 | 3.830412367 | 3.493416095 | protein_coding   | 11 | 58390146  | 58393198  |
| ENSG00000242692 | 0           | 1.16600992  | pseudogene       | 17 | 10162079  | 10162549  |
| ENSG00000242693 | 2.35979773  | 2.242360793 | rRNA_pseudogen   | 2  | 191402645 | 191402786 |
| ENSG00000242696 | 3.004694206 | 3.368666104 | scRNA_pseudoge   | 2  | 203221886 | 203222140 |
| ENSG00000242697 | 0.869158192 | 0.697730409 | pseudogene       | 4  | 98946541  | 98947391  |
| ENSG00000242703 | 0.499066092 | 0           | pseudogene       | 7  | 140697752 | 140699600 |
| ENSG00000242712 | 2.57521082  | 2.334191469 | scRNA_pseudoge   | 11 | 118865044 | 118865269 |
| ENSG00000242715 | 2.762599152 | 0.697730409 | protein_coding   | 13 | 36801182  | 36871977  |
| ENSG00000242719 | 0           | 0.950786998 | scRNA_pseudoge   | 8  | 42736379  | 42736607  |
| ENSG00000242724 | 0           | 0.390640832 | snRNA_pseudoge   | 7  | 29734925  | 29735011  |
| ENSG00000242731 | 0.869158192 | 0.390640832 | pseudogene       | 7  | 6971315   | 6979234   |
| ENSG00000242732 | 3.989024711 | 6.104183162 | protein_coding   | X  | 71346958  | 71351758  |
| ENSG00000242737 | 0           | 0.697730409 | pseudogene       | 15 | 50758935  | 50759293  |
| ENSG00000242742 | 2.10647801  | 1.16600992  | Mt_tRNA_pseudc   | 5  | 134262280 | 134262348 |
| ENSG00000242747 | 0.869158192 | 0.390640832 | pseudogene       | 15 | 59161858  | 59162333  |
| ENSG00000242748 | 0.499066092 | 1.802319292 | pseudogene       | 20 | 39825331  | 39825797  |
| ENSG00000242750 | 0.499066092 | 0           | scRNA_pseudoge   | 19 | 38690874  | 38691172  |
| ENSG00000242756 | 0           | 0.697730409 | pseudogene       | 13 | 19411908  | 19412238  |
| ENSG00000242759 | 3.077135474 | 3.813624741 | processed_transc | 3  | 106555658 | 106959488 |
| ENSG00000242761 | 0           | 0.390640832 | pseudogene       | 18 | 32153951  | 32154569  |
| ENSG00000242765 | 0.499066092 | 0           | snRNA_pseudoge   | 5  | 58518794  | 58518947  |
| ENSG00000242767 | 0           | 0.697730409 | lincRNA          | 3  | 114819270 | 114821908 |
| ENSG00000242779 | 8.146099194 | 8.029489191 | pseudogene       | 19 | 53471504  | 53496777  |
| ENSG00000242795 | 0           | 0.390640832 | sense_intronic   | 3  | 169331298 | 169341739 |
| ENSG00000242797 | 1.407729925 | 0.950786998 | processed_transc | 3  | 52322596  | 52333083  |
| ENSG00000242798 | 2.762599152 | 2.579085888 | processed_transc | 7  | 99712837  | 99724762  |
| ENSG00000242802 | 9.347691482 | 9.303711094 | protein_coding   | 7  | 4815253   | 4833943   |
| ENSG00000242814 | 0.499066092 | 0.390640832 | pseudogene       | 5  | 124144521 | 124144926 |
| ENSG00000242821 | 0           | 0.390640832 | rRNA_pseudogen   | 1  | 42779299  | 42779471  |
| ENSG00000242829 | 0.499066092 | 1.16600992  | pseudogene       | 3  | 119017512 | 119017859 |
| ENSG00000242837 | 0.499066092 | 0           | pseudogene       | 14 | 103707829 | 103708309 |
| ENSG00000242841 | 0.869158192 | 0           | pseudogene       | 3  | 63082050  | 63083387  |
| ENSG00000242852 | 3.652182994 | 3.081239798 | protein_coding   | 19 | 12571998  | 12624668  |
| ENSG00000242853 | 0           | 0.390640832 | scRNA_pseudoge   | 10 | 120972369 | 120972658 |
| ENSG00000242858 | 1.616589159 | 2.579085888 | pseudogene       | 5  | 83042207  | 83042808  |
| ENSG00000242860 | 0           | 0.390640832 | scRNA_pseudoge   | 1  | 62538120  | 62538413  |
| ENSG00000242861 | 4.491309013 | 4.319727133 | processed_transc | 1  | 226028584 | 226034223 |
| ENSG00000242866 | 3.004694206 | 2.334191469 | protein_coding   | 15 | 43891596  | 44020948  |
| ENSG00000242870 | 0           | 0.950786998 | processed_transc | 7  | 91321323  | 91510004  |
| ENSG00000242876 | 0           | 1.16600992  | scRNA_pseudoge   | 22 | 20836222  | 20836500  |
| ENSG00000242882 | 0.499066092 | 0           | pseudogene       | 4  | 174340396 | 174341288 |
| ENSG00000242883 | 0.499066092 | 0.390640832 | scRNA_pseudoge   | 1  | 156702981 | 156703049 |
| ENSG00000242888 | 0.499066092 | 0.697730409 | pseudogene       | 14 | 100440673 | 100441486 |
| ENSG00000242893 | 0.499066092 | 0           | scRNA_pseudoge   | 13 | 52168055  | 52168350  |
| ENSG00000242894 | 2.10647801  | 1.353254395 | scRNA_pseudoge   | 14 | 104479979 | 104480270 |
| ENSG00000242899 | 0.499066092 | 0.697730409 | pseudogene       | 3  | 131962372 | 131963109 |

|                 |             |             |                  |    |           |           |          |
|-----------------|-------------|-------------|------------------|----|-----------|-----------|----------|
| ENSG00000242904 | 0           | 0.390640832 | tRNA_pseudogen   | 1  | 149672905 | 149672976 | TRNAF16P |
| ENSG00000242908 | 0           | 0.390640832 | processed_transc | 3  | 151469231 | 151645963 |          |
| ENSG00000242910 | 0.499066092 | 0           | scRNA_pseudoge   | 12 | 58251213  | 58251448  |          |
| ENSG00000242912 | 0           | 0.390640832 | scRNA_pseudoge   | 10 | 116183529 | 116183826 |          |
| ENSG00000242927 | 2.928422289 | 2.788380093 | Mt_tRNA_pseudc   | 7  | 145694421 | 145694483 |          |
| ENSG00000242931 | 0.869158192 | 0           | pseudogene       | 17 | 74426499  | 74427206  |          |
| ENSG00000242937 | 2.10647801  | 2.971122874 | lincRNA          | 1  | 717325    | 720070    |          |
| ENSG00000242941 | 0.499066092 | 0           | pseudogene       | 14 | 69159807  | 69160300  |          |
| ENSG00000242946 | 0           | 0.390640832 | Mt_tRNA_pseudc   | 8  | 32874566  | 32874633  |          |
| ENSG00000242948 | 0.499066092 | 0           | pseudogene       | 7  | 46820971  | 46823041  | EPS15P1  |
| ENSG00000242950 | 1.407729925 | 1.667587519 | protein_coding   | 7  | 92097695  | 92100738  | ERVW-1   |
| ENSG00000242951 | 0.499066092 | 1.16600992  | pseudogene       | 14 | 76062148  | 76062549  |          |
| ENSG00000242952 | 0.869158192 | 0.697730409 | pseudogene       | 14 | 77101118  | 77102004  |          |
| ENSG00000242953 | 0.499066092 | 0           | pseudogene       | 3  | 75444555  | 75444687  |          |
| ENSG00000242956 | 0           | 0.390640832 | rRNA_pseudogen   | 15 | 55655754  | 55655843  |          |
| ENSG00000242958 | 0           | 0.390640832 | pseudogene       | 8  | 28667620  | 28667935  |          |
| ENSG00000242959 | 2.671945279 | 2.420525079 | processed_transc | 1  | 120143780 | 120145118 |          |
| ENSG00000242960 | 5.270908378 | 5.404622322 | pseudogene       | 3  | 72978195  | 72978744  | FTH1P23  |
| ENSG00000242961 | 1.16343121  | 0           | rRNA_pseudogen   | 14 | 23986946  | 23987095  |          |
| ENSG00000242968 | 0           | 0.697730409 | pseudogene       | 3  | 136527393 | 136528465 |          |
| ENSG00000242970 | 0.499066092 | 0           | pseudogene       | 8  | 59500979  | 59501323  |          |
| ENSG00000242973 | 0           | 0.390640832 | processed_transc | 6  | 46638181  | 46655902  |          |
| ENSG00000242974 | 0.499066092 | 0           | rRNA_pseudogen   | 6  | 3080073   | 3080131   |          |
| ENSG00000242990 | 0           | 0.950786998 | pseudogene       | 12 | 58068448  | 58069027  |          |
| ENSG00000242992 | 3.652182994 | 3.411459265 | pseudogene       | 3  | 128483309 | 128483861 | FTH1P4   |
| ENSG00000242996 | 0           | 1.518964905 | processed_transc | 6  | 30201816  | 30293911  | HCG17    |
| ENSG00000242999 | 0           | 0.697730409 | scRNA_pseudoge   | 11 | 74556956  | 74557247  |          |
| ENSG00000243005 | 0.499066092 | 0           | scRNA_pseudoge   | 4  | 24564816  | 24565083  |          |
| ENSG00000243007 | 1.960915222 | 2.039052734 | pseudogene       | 15 | 72671556  | 72672051  |          |
| ENSG00000243013 | 4.999881834 | 5.125003832 | rRNA_pseudogen   | 1  | 145277250 | 145277501 |          |
| ENSG00000243014 | 0           | 1.353254395 | pseudogene       | 3  | 116745545 | 116745886 | PTMAP8   |
| ENSG00000243015 | 2.471521042 | 2.912743273 | scRNA_pseudoge   | 12 | 93903263  | 93903545  |          |
| ENSG00000243016 | 2.238690726 | 0.697730409 | pseudogene       | 3  | 126940037 | 126940724 |          |
| ENSG00000243020 | 0           | 0.390640832 | pseudogene       | 12 | 65261736  | 65262479  |          |
| ENSG00000243023 | 0           | 0.390640832 | pseudogene       | 14 | 58607997  | 58608378  | UBA52P3  |
| ENSG00000243024 | 2.35979773  | 2.721932731 | pseudogene       | 12 | 64616117  | 64790845  | RPS11P6  |
| ENSG00000243025 | 0           | 0.390640832 | pseudogene       | 3  | 158327399 | 158328646 | MTAPP1   |
| ENSG00000243028 | 0.499066092 | 0.390640832 | scRNA_pseudoge   | 6  | 28111272  | 28111354  |          |
| ENSG00000243043 | 0           | 0.390640832 | Mt_tRNA_pseudc   | 11 | 10531757  | 10531827  |          |
| ENSG00000243049 | 0           | 0.390640832 | scRNA_pseudoge   | 17 | 2461136   | 2461388   |          |
| ENSG00000243051 | 0           | 0.697730409 | scRNA_pseudoge   | 1  | 169927083 | 169927386 |          |
| ENSG00000243053 | 0           | 0.390640832 | pseudogene       | 17 | 27129468  | 27129842  |          |
| ENSG00000243055 | 0.869158192 | 1.925536307 | antisense        | X  | 30718115  | 30742291  | GK-AS1   |
| ENSG00000243056 | 3.448790144 | 1.925536307 | protein_coding   | 5  | 139927251 | 139929163 | EIF4EBP3 |
| ENSG00000243077 | 0           | 0.390640832 | processed_transc | 3  | 62246540  | 62248415  |          |
| ENSG00000243079 | 0           | 0.390640832 | processed_transc | 13 | 47029338  | 47035157  |          |
| ENSG00000243084 | 0           | 0.390640832 | Mt_tRNA_pseudc   | 3  | 152637483 | 152637548 |          |
| ENSG00000243089 | 0           | 0.390640832 | lincRNA          | 3  | 99226031  | 99245957  |          |
| ENSG00000243092 | 10.39698226 | 10.42052507 | rRNA_pseudogen   | 12 | 34372314  | 34372611  |          |
| ENSG00000243093 | 0           | 0.390640832 | rRNA_pseudogen   | 9  | 32537939  | 32538175  |          |
| ENSG00000243094 | 0.499066092 | 0.697730409 | pseudogene       | 15 | 34378112  | 34378515  |          |
| ENSG00000243095 | 0.499066092 | 0.390640832 | pseudogene       | 8  | 39015057  | 39016220  |          |
| ENSG00000243099 | 0           | 0.950786998 | pseudogene       | 7  | 138373725 | 138374267 |          |
| ENSG00000243101 | 0           | 0.697730409 | pseudogene       | 16 | 78859178  | 78859903  |          |
| ENSG00000243103 | 0.499066092 | 0           | scRNA_pseudoge   | 14 | 51104409  | 51104699  |          |
| ENSG00000243107 | 3.274897671 | 3.081239798 | processed_transc | 7  | 91829328  | 91836171  |          |
| ENSG00000243116 | 0           | 0.390640832 | pseudogene       | 3  | 159439313 | 159440190 |          |
| ENSG00000243130 | 0           | 0.697730409 | protein_coding   | 19 | 43511808  | 43530664  | PSG11    |
| ENSG00000243133 | 0.499066092 | 0           | scRNA_pseudoge   | 8  | 74746008  | 74746277  |          |
| ENSG00000243137 | 6.710639711 | 7.896480033 | protein_coding   | 19 | 43696854  | 43709926  | PSG4     |
| ENSG00000243147 | 8.677151638 | 9.709987339 | protein_coding   | 2  | 27994584  | 28210954  | MRPL33   |
| ENSG00000243153 | 0.869158192 | 1.353254395 | antisense        | 1  | 43300352  | 43312093  |          |
| ENSG00000243155 | 3.077135474 | 3.183544561 | processed_transc | 1  | 180913178 | 180945618 |          |

|                 |             |             |                  |    |           |           |           |
|-----------------|-------------|-------------|------------------|----|-----------|-----------|-----------|
| ENSG00000243156 | 3.603959378 | 4.342020395 | protein_coding   | 22 | 18317094  | 18507325  | MICAL3    |
| ENSG00000243167 | 1.16343121  | 0.390640832 | pseudogene       | 19 | 43174157  | 43174968  |           |
| ENSG00000243172 | 14.28733166 | 14.38993904 | rRNA_pseudogen   | 11 | 85195012  | 85195304  |           |
| ENSG00000243175 | 0           | 0.950786998 | pseudogene       | 4  | 144345906 | 144347166 |           |
| ENSG00000243176 | 0.869158192 | 0.950786998 | processed_transc | 3  | 156893012 | 157099054 |           |
| ENSG00000243181 | 0.499066092 | 0.390640832 | pseudogene       | 8  | 34731677  | 34732151  |           |
| ENSG00000243185 | 13.26776881 | 13.36481607 | rRNA_pseudogen   | 4  | 70296579  | 70296753  |           |
| ENSG00000243190 | 1.407729925 | 1.518964905 | scRNA_pseudoge   | 6  | 43004258  | 43004560  |           |
| ENSG00000243199 | 4.842525946 | 4.547834947 | pseudogene       | 4  | 66439177  | 66440046  |           |
| ENSG00000243201 | 0           | 0.390640832 | tRNA_pseudogen   | 17 | 38273553  | 38273626  | TRNAU3    |
| ENSG00000243223 | 0           | 0.390640832 | snoRNA_pseudog   | 1  | 45238315  | 45238388  |           |
| ENSG00000243224 | 2.35979773  | 2.721932731 | processed_transc | 3  | 52273274  | 52275113  |           |
| ENSG00000243225 | 1.407729925 | 0.390640832 | pseudogene       | 14 | 77435026  | 77435489  |           |
| ENSG00000243232 | 4.999881834 | 4.622587519 | protein_coding   | 5  | 140345820 | 140391936 | PCDHAC2   |
| ENSG00000243234 | 1.616589159 | 2.039052734 | pseudogene       | 19 | 58464526  | 58465127  |           |
| ENSG00000243243 | 3.211941663 | 1.925536307 | antisense        | 7  | 115877983 | 115967950 |           |
| ENSG00000243244 | 1.960915222 | 1.667587519 | protein_coding   | 2  | 48756522  | 48826025  | STON1     |
| ENSG00000243250 | 0.869158192 | 0.697730409 | pseudogene       | 11 | 112106094 | 112106748 | RPS6P16   |
| ENSG00000243251 | 0           | 0.390640832 | protein_coding   | 10 | 50723151  | 50732273  | PGBD3     |
| ENSG00000243256 | 0           | 0.390640832 | pseudogene       | 18 | 59072091  | 59072438  |           |
| ENSG00000243260 | 0           | 0.390640832 | scRNA_pseudoge   | 4  | 39762620  | 39762918  |           |
| ENSG00000243265 | 1.16343121  | 1.667587519 | pseudogene       | 8  | 23064431  | 23064882  |           |
| ENSG00000243273 | 0.499066092 | 0           | antisense        | 3  | 150608423 | 150756605 |           |
| ENSG00000243276 | 0           | 0.390640832 | lincRNA          | 3  | 117723666 | 118276515 |           |
| ENSG00000243279 | 7.985986001 | 8.530667964 | protein_coding   | X  | 48928820  | 48931733  | PRAF2     |
| ENSG00000243280 | 0.499066092 | 0.390640832 | pseudogene       | 4  | 113092371 | 113092683 |           |
| ENSG00000243284 | 1.407729925 | 2.501982735 | protein_coding   | 1  | 159824106 | 159832447 | VSIG8     |
| ENSG00000243297 | 0.499066092 | 0.697730409 | pseudogene       | 19 | 37392644  | 37393021  |           |
| ENSG00000243302 | 5.869093502 | 5.726093467 | pseudogene       | 7  | 128291239 | 128292388 |           |
| ENSG00000243304 | 0.499066092 | 1.16600992  | pseudogene       | 5  | 114600350 | 114601214 |           |
| ENSG00000243312 | 4.821592551 | 4.932754837 | pseudogene       | 4  | 87791344  | 87792187  |           |
| ENSG00000243314 | 0.499066092 | 0.390640832 | pseudogene       | 3  | 158214350 | 158214723 |           |
| ENSG00000243315 | 1.799000381 | 1.925536307 | scRNA_pseudoge   | 11 | 118865384 | 118865470 |           |
| ENSG00000243317 | 8.94855698  | 8.749726325 | protein_coding   | 7  | 135347244 | 135378166 | C7orf73   |
| ENSG00000243323 | 1.16343121  | 1.16600992  | pseudogene       | 1  | 202137179 | 202158583 | PTPRVP    |
| ENSG00000243329 | 0.499066092 | 0           | Mt_tRNA_pseudc   | 1  | 564879    | 564950    |           |
| ENSG00000243335 | 7.058051099 | 6.970281236 | protein_coding   | 7  | 66093868  | 66276446  | KCTD7     |
| ENSG00000243339 | 0.499066092 | 0.950786998 | scRNA_pseudoge   | 3  | 196126793 | 196127077 |           |
| ENSG00000243352 | 0.869158192 | 0.697730409 | scRNA_pseudoge   | 7  | 104552368 | 104552584 |           |
| ENSG00000243353 | 0           | 0.697730409 | pseudogene       | 11 | 113621838 | 113622008 |           |
| ENSG00000243357 | 0.499066092 | 0           | Mt_tRNA_pseudc   | 21 | 45894981  | 45895050  |           |
| ENSG00000243364 | 6.652556929 | 7.195117037 | protein_coding   | 1  | 155036207 | 155042029 | EFNA4     |
| ENSG00000243368 | 1.16343121  | 1.353254395 | antisense        | 3  | 182734043 | 182735420 | MCCC1-AS1 |
| ENSG00000243370 | 0.499066092 | 0.697730409 | scRNA_pseudoge   | 17 | 17081733  | 17081985  |           |
| ENSG00000243375 | 0.869158192 | 0.390640832 | scRNA_pseudoge   | 11 | 126186597 | 126186713 |           |
| ENSG00000243388 | 0.499066092 | 0.390640832 | pseudogene       | 14 | 57445127  | 57446339  | RPL3P3    |
| ENSG00000243389 | 1.407729925 | 0.697730409 | processed_transc | 2  | 113346617 | 113372008 |           |
| ENSG00000243396 | 0.499066092 | 0           | pseudogene       | 3  | 101318087 | 101318488 |           |
| ENSG00000243398 | 0.869158192 | 0.950786998 | scRNA_pseudoge   | 3  | 171955137 | 171955387 |           |
| ENSG00000243402 | 1.16343121  | 0           | pseudogene       | 8  | 130876724 | 130877298 |           |
| ENSG00000243403 | 0           | 0.950786998 | pseudogene       | 15 | 64885178  | 64885525  |           |
| ENSG00000243404 | 0.499066092 | 1.353254395 | pseudogene       | 15 | 66738792  | 66739115  | RPL35AP32 |
| ENSG00000243408 | 0           | 0.390640832 | scRNA_pseudoge   | 1  | 32545086  | 32545298  |           |
| ENSG00000243415 | 0           | 1.667587519 | processed_transc | 3  | 145781829 | 145822991 |           |
| ENSG00000243422 | 1.799000381 | 3.081239798 | pseudogene       | 3  | 75673837  | 75674304  |           |
| ENSG00000243423 | 0.499066092 | 0           | pseudogene       | 17 | 33403756  | 33404026  |           |
| ENSG00000243426 | 1.16343121  | 0.950786998 | scRNA_pseudoge   | 17 | 76528941  | 76529137  |           |
| ENSG00000243429 | 0.499066092 | 0.697730409 | pseudogene       | 3  | 125430983 | 125431889 |           |
| ENSG00000243431 | 1.16343121  | 1.518964905 | pseudogene       | 11 | 118431405 | 118432295 | RPL5P30   |
| ENSG00000243433 | 2.10647801  | 1.518964905 | antisense        | 7  | 150725868 | 150726841 |           |
| ENSG00000243437 | 0           | 0.390640832 | scRNA_pseudoge   | 1  | 78111009  | 78111303  |           |
| ENSG00000243438 | 0.499066092 | 0           | pseudogene       | 7  | 105955671 | 105956189 |           |
| ENSG00000243443 | 0           | 0.697730409 | scRNA_pseudoge   | 10 | 74830283  | 74830390  |           |

|                 |             |             |                  |    |           |           |           |
|-----------------|-------------|-------------|------------------|----|-----------|-----------|-----------|
| ENSG00000243444 | 6.343050432 | 6.293387477 | protein_coding   | 9  | 112403068 | 112713755 | PALM2     |
| ENSG00000243445 | 0           | 1.353254395 | pseudogene       | 16 | 2382314   | 2382733   |           |
| ENSG00000243449 | 6.032862302 | 6.577981353 | protein_coding   | 4  | 2043689   | 2045697   | C4orf48   |
| ENSG00000243452 | 7.23866569  | 7.747865429 | protein_coding   | 1  | 148555979 | 148596267 | NBPF15    |
| ENSG00000243453 | 0.499066092 | 1.16600992  | pseudogene       | 22 | 35590692  | 35590935  |           |
| ENSG00000243455 | 0           | 0.697730409 | pseudogene       | 19 | 18159447  | 18159910  |           |
| ENSG00000243468 | 0.869158192 | 0.390640832 | pseudogene       | X  | 70711529  | 70712778  | INGX      |
| ENSG00000243473 | 1.16343121  | 0.950786998 | processed_transc | 20 | 1146924   | 1160596   |           |
| ENSG00000243477 | 6.830742851 | 7.04692429  | protein_coding   | 3  | 50333833  | 50336852  | NAT6      |
| ENSG00000243478 | 0.869158192 | 0.390640832 | pseudogene       | 2  | 201560640 | 201658962 | AOX2P     |
| ENSG00000243479 | 5.431503808 | 4.841813558 | antisense        | 7  | 156803499 | 156809120 |           |
| ENSG00000243483 | 0.499066092 | 0.390640832 | pseudogene       | 3  | 112760237 | 112760661 |           |
| ENSG00000243491 | 0.869158192 | 0           | lincRNA          | 2  | 9897625   | 9910470   |           |
| ENSG00000243498 | 1.407729925 | 1.667587519 | pseudogene       | 8  | 124249092 | 124249302 | UBA52P5   |
| ENSG00000243504 | 0.499066092 | 0.390640832 | pseudogene       | 8  | 98877282  | 98877713  |           |
| ENSG00000243508 | 0           | 0.390640832 | pseudogene       | 3  | 125062929 | 125063641 |           |
| ENSG00000243514 | 0           | 0.390640832 | pseudogene       | 17 | 70623370  | 70623766  | RPL32P33  |
| ENSG00000243517 | 1.616589159 | 2.420525079 | pseudogene       | 12 | 31404926  | 31405531  |           |
| ENSG00000243519 | 1.616589159 | 0.697730409 | pseudogene       | 22 | 32772669  | 32773122  |           |
| ENSG00000243526 | 0           | 0.390640832 | snoRNA_pseudog   | 14 | 31775726  | 31775799  |           |
| ENSG00000243533 | 1.16343121  | 0.697730409 | processed_transc | 1  | 235582830 | 235590298 |           |
| ENSG00000243537 | 0           | 0.950786998 | pseudogene       | 8  | 134338240 | 134338647 |           |
| ENSG00000243538 | 1.16343121  | 0.390640832 | pseudogene       | 5  | 16902403  | 16902750  |           |
| ENSG00000243546 | 0           | 0.697730409 | scRNA_pseudoge   | 14 | 68702960  | 68703255  |           |
| ENSG00000243547 | 2.847891871 | 2.721932731 | pseudogene       | 3  | 96068398  | 96069783  | HNRNPKP4  |
| ENSG00000243554 | 5.458875168 | 5.683080141 | pseudogene       | 7  | 97598317  | 97601566  |           |
| ENSG00000243560 | 0.869158192 | 0.390640832 | scRNA_pseudoge   | 19 | 47192054  | 47192325  |           |
| ENSG00000243562 | 0.869158192 | 0.390640832 | scRNA_pseudoge   | 11 | 440473    | 440692    |           |
| ENSG00000243563 | 0           | 0.697730409 | scRNA_pseudoge   | 1  | 33494833  | 33495177  |           |
| ENSG00000243565 | 0           | 0.390640832 | processed_transc | 2  | 231067826 | 231099681 |           |
| ENSG00000243566 | 3.077135474 | 1.802319292 | protein_coding   | 7  | 76139745  | 76648340  | UPK3B     |
| ENSG00000243582 | 0.869158192 | 0           | snRNA_pseudoge   | 17 | 41445276  | 41445450  |           |
| ENSG00000243587 | 5.107569429 | 5.09905904  | protein_coding   | 6  | 109487036 | 109592217 | C6orf183  |
| ENSG00000243592 | 1.16343121  | 1.925536307 | pseudogene       | 5  | 55432806  | 55433358  | RPL17P22  |
| ENSG00000243597 | 0           | 0.390640832 | rRNA_pseudogen   | 10 | 70770155  | 70770289  |           |
| ENSG00000243607 | 0.499066092 | 0.697730409 | pseudogene       | 11 | 126148209 | 126148472 | RPL35AP26 |
| ENSG00000243609 | 0           | 0.390640832 | pseudogene       | 16 | 48611435  | 48612280  | RPS2P44   |
| ENSG00000243627 | 0.869158192 | 0.390640832 | protein_coding   | 21 | 35786792  | 35796264  |           |
| ENSG00000243628 | 2.471521042 | 3.411459265 | processed_transc | 10 | 104221152 | 104230846 |           |
| ENSG00000243629 | 1.407729925 | 1.353254395 | lincRNA          | 3  | 156799456 | 156840793 |           |
| ENSG00000243630 | 0.499066092 | 1.16600992  | snoRNA_pseudog   | 17 | 4185068   | 4185139   |           |
| ENSG00000243635 | 0.499066092 | 2.334191469 | pseudogene       | 3  | 104221544 | 104222110 |           |
| ENSG00000243637 | 1.16343121  | 0           | processed_transc | 2  | 234263220 | 234301045 |           |
| ENSG00000243642 | 1.960915222 | 1.925536307 | scRNA_pseudoge   | 19 | 58581338  | 58581656  |           |
| ENSG00000243646 | 6.93675248  | 6.544728831 | protein_coding   | 21 | 34638663  | 34669539  | IL10RB    |
| ENSG00000243648 | 0           | 0.390640832 | pseudogene       | 5  | 133758529 | 133759026 |           |
| ENSG00000243649 | 8.241782151 | 9.102951831 | protein_coding   | 6  | 31895475  | 31919861  | CFB       |
| ENSG00000243650 | 0.869158192 | 0.697730409 | scRNA_pseudoge   | 2  | 231371816 | 231372101 |           |
| ENSG00000243658 | 0.499066092 | 0.390640832 | pseudogene       | 3  | 106617736 | 106619438 | MTND5P16  |
| ENSG00000243660 | 3.077135474 | 3.183544561 | protein_coding   | 10 | 43932282  | 43991517  | ZNF487P   |
| ENSG00000243663 | 1.799000381 | 3.368666104 | pseudogene       | 12 | 1866397   | 1867177   |           |
| ENSG00000243667 | 5.331395195 | 4.65855978  | protein_coding   | 2  | 68350068  | 68384692  | WDR92     |
| ENSG00000243669 | 0.499066092 | 0.390640832 | pseudogene       | 11 | 122906575 | 122906932 | RPL34P23  |
| ENSG00000243672 | 0.499066092 | 0           | pseudogene       | 11 | 67693122  | 67693902  | RPS3AP40  |
| ENSG00000243675 | 0           | 0.390640832 | pseudogene       | 3  | 158481220 | 158481542 |           |
| ENSG00000243679 | 6.47626108  | 6.204928885 | pseudogene       | 7  | 128294023 | 128294776 |           |
| ENSG00000243680 | 1.616589159 | 3.081239798 | pseudogene       | 19 | 52646296  | 52646589  |           |
| ENSG00000243683 | 0           | 0.390640832 | rRNA_pseudogen   | 9  | 126813738 | 126813813 |           |
| ENSG00000243687 | 0.499066092 | 0           | pseudogene       | 3  | 160060473 | 160060803 |           |
| ENSG00000243696 | 3.502389126 | 2.851901313 | protein_coding   | 3  | 52847298  | 52874278  | MUSTN1    |
| ENSG00000243697 | 1.799000381 | 1.802319292 | pseudogene       | 16 | 86559063  | 86559858  |           |
| ENSG00000243698 | 0.499066092 | 0.390640832 | processed_transc | 10 | 75570442  | 75571556  |           |
| ENSG00000243701 | 7.140657543 | 7.408200217 | processed_transc | 3  | 106959539 | 107045811 |           |

|                 |             |             |                  |    |           |           |            |
|-----------------|-------------|-------------|------------------|----|-----------|-----------|------------|
| ENSG00000243708 | 3.393122761 | 3.027231696 | protein_coding   | 15 | 42129973  | 42140345  | PLA2G4B    |
| ENSG00000243709 | 0.869158192 | 1.353254395 | protein_coding   | 1  | 226073982 | 226099082 | LEFTY1     |
| ENSG00000243710 | 3.274897671 | 3.279072565 | protein_coding   | 1  | 43637820  | 43720029  | WDR65      |
| ENSG00000243716 | 5.91922012  | 5.43605125  | protein_coding   | 16 | 22490442  | 22547842  |            |
| ENSG00000243721 | 1.16343121  | 0.697730409 | pseudogene       | 11 | 43740226  | 43740696  |            |
| ENSG00000243725 | 4.517578978 | 4.744751758 | protein_coding   | 1  | 55181495  | 55208330  | TTC4       |
| ENSG00000243726 | 0           | 0.390640832 | snoRNA_pseudog   | 17 | 11980411  | 11980485  |            |
| ENSG00000243736 | 0.499066092 | 0.697730409 | processed_transc | X  | 108867473 | 108877915 |            |
| ENSG00000243738 | 0           | 1.16600992  | scRNA_pseudoge   | 9  | 123965440 | 123965713 |            |
| ENSG00000243742 | 6.681890601 | 7.100213554 | pseudogene       | 11 | 61382508  | 61406921  | RPLP0P2    |
| ENSG00000243744 | 2.35979773  | 2.144285137 | pseudogene       | 5  | 13638028  | 13638490  |            |
| ENSG00000243745 | 1.960915222 | 1.802319292 | scRNA_pseudoge   | 19 | 16509482  | 16509770  |            |
| ENSG00000243746 | 2.238690726 | 2.144285137 | pseudogene       | 7  | 144344279 | 144345668 | EEF1A1P10  |
| ENSG00000243753 | 4.734682531 | 5.6022688   | pseudogene       | 6  | 30227361  | 30260791  | HLA-L      |
| ENSG00000243754 | 1.407729925 | 1.802319292 | processed_transc | 9  | 4860454   | 4885917   |            |
| ENSG00000243756 | 0.499066092 | 0           | Mt_tRNA_pseudc   | 19 | 38063089  | 38063151  |            |
| ENSG00000243759 | 1.16343121  | 0.390640832 | pseudogene       | 3  | 143235965 | 143237071 | ST13P15    |
| ENSG00000243768 | 0           | 0.390640832 | processed_transc | X  | 152617487 | 152625568 |            |
| ENSG00000243770 | 0           | 0.697730409 | scRNA_pseudoge   | 2  | 175104873 | 175105190 |            |
| ENSG00000243771 | 0.499066092 | 0.390640832 | pseudogene       | 19 | 17700404  | 17700880  |            |
| ENSG00000243775 | 3.077135474 | 2.420525079 | pseudogene       | 6  | 159262149 | 159278664 | OSTCP1     |
| ENSG00000243779 | 0           | 0.390640832 | pseudogene       | 18 | 13919602  | 13919922  |            |
| ENSG00000243782 | 0           | 0.390640832 | scRNA_pseudoge   | 10 | 89592575  | 89592847  |            |
| ENSG00000243788 | 1.616589159 | 1.353254395 | processed_transc | 2  | 37440610  | 37443336  |            |
| ENSG00000243790 | 0           | 0.697730409 | scRNA_pseudoge   | 15 | 72904207  | 72904373  |            |
| ENSG00000243795 | 0.499066092 | 0.950786998 | lincRNA          | 3  | 112861197 | 112886666 |            |
| ENSG00000243797 | 1.407729925 | 0           | processed_transc | 7  | 106012697 | 106372895 |            |
| ENSG00000243800 | 0.499066092 | 0           | scRNA_pseudoge   | 12 | 120456703 | 120457065 |            |
| ENSG00000243802 | 0.869158192 | 0.390640832 | pseudogene       | 11 | 47212732  | 47213093  |            |
| ENSG00000243811 | 7.066972635 | 6.754561598 | protein_coding   | 22 | 39410368  | 39429256  | APOBEC3D   |
| ENSG00000243819 | 1.616589159 | 0.697730409 | scRNA_pseudoge   | 2  | 10831664  | 10831957  |            |
| ENSG00000243822 | 0.499066092 | 0           | pseudogene       | 3  | 149074956 | 149075332 |            |
| ENSG00000243829 | 3.077135474 | 3.183544561 | pseudogene       | 19 | 50222755  | 50223338  |            |
| ENSG00000243830 | 0           | 0.697730409 | pseudogene       | 12 | 8613214   | 8613825   |            |
| ENSG00000243844 | 0.869158192 | 1.667587519 | pseudogene       | 8  | 29489607  | 29490160  | RPL17P33   |
| ENSG00000243849 | 0.869158192 | 0.950786998 | antisense        | 3  | 113122838 | 113152839 | WDR52-AS1  |
| ENSG00000243854 | 0.869158192 | 0.390640832 | scRNA_pseudoge   | 12 | 19456415  | 19456708  |            |
| ENSG00000243859 | 1.16343121  | 1.16600992  | pseudogene       | 5  | 84760252  | 84761128  |            |
| ENSG00000243871 | 1.16343121  | 0           | scRNA_pseudoge   | 15 | 43683661  | 43683918  |            |
| ENSG00000243884 | 5.036678094 | 5.018301917 | rRNA_pseudogen   | 14 | 90341365  | 90341577  |            |
| ENSG00000243886 | 1.407729925 | 0.697730409 | pseudogene       | 3  | 137254414 | 137254984 |            |
| ENSG00000243888 | 0.499066092 | 0.390640832 | lincRNA          | 9  | 72043164  | 72043637  |            |
| ENSG00000243902 | 2.762599152 | 2.420525079 | processed_transc | 22 | 37735624  | 37823505  |            |
| ENSG00000243904 | 1.16343121  | 0.390640832 | pseudogene       | 14 | 103840370 | 103841253 |            |
| ENSG00000243905 | 0.869158192 | 1.16600992  | scRNA_pseudoge   | 1  | 26919736  | 26920037  |            |
| ENSG00000243910 | 0.499066092 | 1.518964905 | pseudogene       | 2  | 220117965 | 220136910 | TUBA4B     |
| ENSG00000243916 | 0           | 0.390640832 | pseudogene       | 12 | 15592461  | 15593335  |            |
| ENSG00000243918 | 0.499066092 | 0           | pseudogene       | 3  | 122379460 | 122381285 | EIF4BP8    |
| ENSG00000243926 | 2.471521042 | 3.081239798 | antisense        | 3  | 156389651 | 156392167 | TIPARP-AS1 |
| ENSG00000243927 | 8.233881494 | 8.415818989 | protein_coding   | 21 | 35445524  | 35515334  | MRPS6      |
| ENSG00000243943 | 6.146643566 | 7.093659051 | protein_coding   | 2  | 27805897  | 27858041  | ZNF512     |
| ENSG00000243955 | 0.869158192 | 2.144285137 | protein_coding   | 6  | 52656462  | 52668708  | GSTA1      |
| ENSG00000243959 | 0           | 0.390640832 | scRNA_pseudoge   | 5  | 175974447 | 175974727 |            |
| ENSG00000243960 | 1.799000381 | 1.802319292 | processed_transc | 1  | 111981260 | 111983986 |            |
| ENSG00000243964 | 2.10647801  | 0.950786998 | pseudogene       | 11 | 9627689   | 9628156   |            |
| ENSG00000243970 | 1.960915222 | 2.242360793 | pseudogene       | 1  | 39997510  | 40024379  | PPIEL      |
| ENSG00000243974 | 0.499066092 | 0.390640832 | pseudogene       | 3  | 99944218  | 99944917  |            |
| ENSG00000243978 | 2.35979773  | 1.667587519 | protein_coding   | X  | 109602044 | 109699562 | RGAG1      |
| ENSG00000243979 | 1.16343121  | 1.518964905 | pseudogene       | 8  | 95903467  | 95904335  |            |
| ENSG00000243986 | 0.499066092 | 0.390640832 | pseudogene       | 3  | 124580941 | 124582164 | ENO1P3     |
| ENSG00000243989 | 3.502389126 | 4.127774132 | protein_coding   | 3  | 52009066  | 52023213  | ACY1       |
| ENSG00000244001 | 1.16343121  | 0           | scRNA_pseudoge   | 7  | 150053841 | 150053924 |            |
| ENSG00000244002 | 0           | 0.390640832 | pseudogene       | 4  | 81082283  | 81083165  |            |

|                 |             |             |                  |    |           |           |            |
|-----------------|-------------|-------------|------------------|----|-----------|-----------|------------|
| ENSG00000244005 | 9.43383913  | 9.416334062 | protein_coding   | 20 | 34220262  | 34287281  | NFS1       |
| ENSG00000244008 | 0           | 0.697730409 | processed_transc | 7  | 63580809  | 63611099  |            |
| ENSG00000244009 | 0.499066092 | 1.16600992  | pseudogene       | 3  | 160170386 | 160171191 |            |
| ENSG00000244018 | 0           | 0.390640832 | pseudogene       | 8  | 18632057  | 18632428  | RPL35P6    |
| ENSG00000244022 | 1.407729925 | 0.950786998 | scRNA_pseudoge   | 14 | 73528590  | 73528837  |            |
| ENSG00000244026 | 6.777386522 | 6.870289474 | pseudogene       | 3  | 75470703  | 75484261  | FAM86DP    |
| ENSG00000244036 | 0.499066092 | 0.390640832 | antisense        | 7  | 129648694 | 129666391 |            |
| ENSG00000244038 | 11.06466575 | 11.2337767  | protein_coding   | 1  | 20978270  | 20988000  | DDOST      |
| ENSG00000244040 | 0.869158192 | 0.697730409 | processed_transc | 3  | 159631189 | 159943086 |            |
| ENSG00000244041 | 3.211941663 | 3.532712221 | processed_transc | 6  | 2988201   | 2991400   |            |
| ENSG00000244044 | 1.407729925 | 0.697730409 | scRNA_pseudoge   | 17 | 64360147  | 64360437  |            |
| ENSG00000244045 | 7.266040677 | 6.99862477  | protein_coding   | 17 | 26684646  | 26708716  | TMEM199    |
| ENSG00000244050 | 0.499066092 | 0.390640832 | pseudogene       | 12 | 8352195   | 8371507   |            |
| ENSG00000244052 | 1.16343121  | 1.518964905 | pseudogene       | 8  | 103935599 | 103936483 | RPL5P24    |
| ENSG00000244053 | 0           | 0.390640832 | pseudogene       | 14 | 47669778  | 47670307  | RPL13AP2   |
| ENSG00000244054 | 2.471521042 | 1.802319292 | processed_transc | 13 | 21872278  | 21878694  |            |
| ENSG00000244055 | 0.869158192 | 1.925536307 | processed_transc | 7  | 92086878  | 92120924  |            |
| ENSG00000244056 | 0           | 0.697730409 | scRNA_pseudoge   | 15 | 84948845  | 84949003  |            |
| ENSG00000244060 | 0.499066092 | 0           | pseudogene       | 12 | 112317167 | 112318048 | RPS2P41    |
| ENSG00000244061 | 0           | 0.390640832 | pseudogene       | 5  | 71677621  | 71678220  |            |
| ENSG00000244063 | 0.499066092 | 0.390640832 | lincRNA          | 2  | 114586967 | 114588696 |            |
| ENSG00000244067 | 1.799000381 | 3.027231696 | protein_coding   | 6  | 52614897  | 52628367  | GSTA2      |
| ENSG00000244071 | 0           | 0.390640832 | pseudogene       | 19 | 52124389  | 52124954  | RPL9P33    |
| ENSG00000244073 | 1.799000381 | 2.334191469 | pseudogene       | 5  | 37085158  | 37085954  |            |
| ENSG00000244080 | 0           | 1.353254395 | scRNA_pseudoge   | 19 | 11626862  | 11627124  |            |
| ENSG00000244086 | 0           | 0.390640832 | pseudogene       | 17 | 37011567  | 37011923  |            |
| ENSG00000244092 | 1.16343121  | 0           | tRNA_pseudogen   | 10 | 969234    | 969312    |            |
| ENSG00000244097 | 2.35979773  | 2.242360793 | pseudogene       | 17 | 560034    | 560787    |            |
| ENSG00000244103 | 0.499066092 | 0           | tRNA_pseudogen   | 16 | 3246153   | 3246225   | TRNAK37P   |
| ENSG00000244117 | 3.335220907 | 3.411459265 | processed_transc | 7  | 63539167  | 63545179  |            |
| ENSG00000244118 | 0.499066092 | 0.390640832 | scRNA_pseudoge   | 4  | 18576746  | 18576848  |            |
| ENSG00000244119 | 0.869158192 | 1.16600992  | pseudogene       | 3  | 101431316 | 101432035 |            |
| ENSG00000244124 | 2.762599152 | 2.652276565 | antisense        | 3  | 141637094 | 141637863 | ATP1B3-AS1 |
| ENSG00000244131 | 0           | 0.390640832 | pseudogene       | 12 | 8895057   | 8895669   | RPSAP51    |
| ENSG00000244134 | 0           | 0.697730409 | pseudogene       | 11 | 72419231  | 72419610  | RPS12P20   |
| ENSG00000244137 | 0           | 0.950786998 | processed_transc | 1  | 230846444 | 230931238 |            |
| ENSG00000244144 | 1.799000381 | 1.518964905 | pseudogene       | 3  | 111904327 | 111904845 |            |
| ENSG00000244146 | 0           | 1.353254395 | pseudogene       | 4  | 165841770 | 165842215 |            |
| ENSG00000244151 | 4.352265886 | 4.226940739 | antisense        | 7  | 150771829 | 150773617 |            |
| ENSG00000244152 | 0.869158192 | 0           | scRNA_pseudoge   | 11 | 47475440  | 47475562  |            |
| ENSG00000244153 | 0.499066092 | 0.697730409 | pseudogene       | 3  | 98376646  | 98379414  |            |
| ENSG00000244155 | 0           | 0.390640832 | pseudogene       | 13 | 19315870  | 19316858  | CYP4F34P   |
| ENSG00000244159 | 1.16343121  | 0.697730409 | pseudogene       | 8  | 54799568  | 54799804  |            |
| ENSG00000244161 | 5.774228067 | 5.085909553 | antisense        | 3  | 58148274  | 58156363  | FLNB-AS1   |
| ENSG00000244165 | 6.887241849 | 6.387491945 | protein_coding   | 19 | 10222214  | 10226048  | P2RY11     |
| ENSG00000244171 | 2.238690726 | 1.518964905 | pseudogene       | 3  | 142895127 | 142897307 | PBX2P1     |
| ENSG00000244176 | 1.616589159 | 1.353254395 | pseudogene       | 11 | 61779223  | 61780074  |            |
| ENSG00000244179 | 0           | 0.697730409 | processed_transc | 6  | 110545499 | 110552835 |            |
| ENSG00000244183 | 0.499066092 | 0           | pseudogene       | 3  | 60717877  | 60718369  |            |
| ENSG00000244184 | 2.10647801  | 2.334191469 | antisense        | 17 | 4607525   | 4608824   |            |
| ENSG00000244187 | 8.412490565 | 8.726612716 | protein_coding   | 9  | 139685807 | 139695010 | TMEM141    |
| ENSG00000244192 | 0.499066092 | 0.390640832 | pseudogene       | 5  | 130325590 | 130326121 |            |
| ENSG00000244198 | 0           | 0.390640832 | antisense        | 7  | 143891951 | 143977640 |            |
| ENSG00000244203 | 0           | 0.390640832 | processed_transc | 3  | 71338920  | 71355004  | FOXP1-AS1  |
| ENSG00000244209 | 1.16343121  | 0.950786998 | antisense        | 17 | 76841412  | 76842209  |            |
| ENSG00000244210 | 3.698846687 | 2.334191469 | processed_transc | 9  | 129986890 | 130003594 |            |
| ENSG00000244217 | 0.499066092 | 0           | pseudogene       | 8  | 95365151  | 95365881  |            |
| ENSG00000244218 | 2.762599152 | 1.353254395 | scRNA_pseudoge   | 7  | 128401395 | 128401652 |            |
| ENSG00000244219 | 1.960915222 | 1.925536307 | processed_transc | 7  | 99195689  | 99208436  |            |
| ENSG00000244226 | 0.499066092 | 0.390640832 | pseudogene       | 3  | 65672976  | 65674143  |            |
| ENSG00000244229 | 0.869158192 | 1.16600992  | pseudogene       | 18 | 74546385  | 74546844  |            |
| ENSG00000244230 | 2.10647801  | 2.501982735 | scRNA_pseudoge   | 9  | 21699311  | 21699523  |            |
| ENSG00000244232 | 0           | 0.390640832 | scRNA_pseudoge   | 3  | 128503991 | 128504290 |            |

|                 |             |             |                    |    |           |           |           |
|-----------------|-------------|-------------|--------------------|----|-----------|-----------|-----------|
| ENSG00000244234 | 4.517578978 | 4.622587519 | pseudogene         | 5  | 177612720 | 177614300 | GMCL1P1   |
| ENSG00000244242 | 7.190493718 | 5.751299057 | protein_coding     | 11 | 1753640   | 1771821   | IFITM10   |
| ENSG00000244245 | 0.499066092 | 0           | pseudogene         | 5  | 107929310 | 107929668 |           |
| ENSG00000244250 | 1.960915222 | 2.971122874 | processed_transc   | 1  | 1663993   | 1667414   |           |
| ENSG00000244251 | 0           | 0.950786998 | pseudogene         | 15 | 40772951  | 40773514  |           |
| ENSG00000244256 | 1.799000381 | 1.802319292 | scRNA_pseudoge     | 1  | 64121426  | 64121718  |           |
| ENSG00000244257 | 0.499066092 | 0.390640832 | pseudogene         | 16 | 16404198  | 16444435  | PKD1P1    |
| ENSG00000244260 | 1.16343121  | 0           | lincRNA            | 2  | 9814152   | 9848542   |           |
| ENSG00000244264 | 0.499066092 | 0.390640832 | scRNA_pseudoge     | 13 | 41696017  | 41696307  |           |
| ENSG00000244265 | 0           | 0.697730409 | antisense          | 3  | 150479724 | 150480325 | SIAH2-AS1 |
| ENSG00000244266 | 0.869158192 | 0.390640832 | pseudogene         | 12 | 50759435  | 50759869  |           |
| ENSG00000244267 | 0.869158192 | 0.950786998 | pseudogene         | 11 | 44650907  | 44651224  |           |
| ENSG00000244268 | 0.499066092 | 0           | antisense          | 3  | 152874300 | 152879564 |           |
| ENSG00000244274 | 3.146112541 | 3.96493948  | protein_coding     | 20 | 44034697  | 44039250  | DBNDD2    |
| ENSG00000244281 | 0           | 0.390640832 | pseudogene         | 3  | 81416141  | 81417172  |           |
| ENSG00000244285 | 0           | 0.390640832 | scRNA_pseudoge     | 10 | 70922597  | 70922685  |           |
| ENSG00000244286 | 0.499066092 | 0           | antisense          | 3  | 124500002 | 124506604 | ITGB5-AS1 |
| ENSG00000244288 | 1.960915222 | 1.802319292 | rRNA_pseudogen     | 18 | 77772847  | 77773065  |           |
| ENSG00000244291 | 5.389447744 | 5.767861411 | protein_coding     | 7  | 156431057 | 156433348 | C7orf13   |
| ENSG00000244296 | 0.869158192 | 0.950786998 | scRNA_pseudoge     | 22 | 19353288  | 19353567  |           |
| ENSG00000244300 | 6.204385613 | 6.030599799 | processed_transc   | 3  | 128208055 | 128221191 |           |
| ENSG00000244306 | 6.922076877 | 8.316585024 | lincRNA            | 14 | 19854098  | 19925348  |           |
| ENSG00000244308 | 0.499066092 | 0.390640832 | scRNA_pseudoge     | 3  | 119829355 | 119829633 |           |
| ENSG00000244313 | 5.223818625 | 6.064512706 | pseudogene         | 11 | 46450163  | 46450700  |           |
| ENSG00000244314 | 0           | 0.697730409 | scRNA_pseudoge     | 3  | 194867457 | 194867732 |           |
| ENSG00000244321 | 0           | 0.390640832 | lincRNA            | 3  | 166287481 | 166288551 |           |
| ENSG00000244324 | 2.10647801  | 0.697730409 | processed_transc   | 1  | 55314138  | 55316072  |           |
| ENSG00000244327 | 0.499066092 | 1.518964905 | processed_transc   | 3  | 142184157 | 142191179 |           |
| ENSG00000244331 | 0           | 0.390640832 | pseudogene         | 5  | 157358266 | 157358571 |           |
| ENSG00000244332 | 0.869158192 | 1.518964905 | processed_transc   | 10 | 96337196  | 96370995  |           |
| ENSG00000244336 | 0.499066092 | 2.721932731 | processed_transc   | 10 | 33247414  | 33249432  |           |
| ENSG00000244342 | 0.499066092 | 0           | processed_transc   | 3  | 62936105  | 63110738  |           |
| ENSG00000244344 | 0.499066092 | 0.950786998 | lincRNA            | 1  | 211859864 | 211863445 |           |
| ENSG00000244346 | 0           | 0.390640832 | pseudogene         | 3  | 182668571 | 182674095 |           |
| ENSG00000244349 | 0.499066092 | 1.518964905 | antisense          | 6  | 28954577  | 28956313  | HCG16     |
| ENSG00000244351 | 0.499066092 | 0.950786998 | processed_transc   | 3  | 133784147 | 133794057 |           |
| ENSG00000244356 | 0           | 0.390640832 | scRNA_pseudoge     | 10 | 33577232  | 33577529  |           |
| ENSG00000244361 | 0.499066092 | 0.390640832 | pseudogene         | 5  | 10488932  | 10489254  |           |
| ENSG00000244363 | 0.869158192 | 1.518964905 | pseudogene         | 5  | 76878201  | 76878947  |           |
| ENSG00000244365 | 1.960915222 | 1.667587519 | processed_transc   | 10 | 74998540  | 75003156  |           |
| ENSG00000244371 | 1.16343121  | 0           | pseudogene         | 1  | 146392451 | 146392852 | PFN1P8    |
| ENSG00000244378 | 1.16343121  | 0.950786998 | pseudogene         | 16 | 69067578  | 69069945  | RPS2P45   |
| ENSG00000244380 | 0           | 0.390640832 | processed_transc   | 3  | 48481762  | 48488060  |           |
| ENSG00000244387 | 0.869158192 | 0.697730409 | Mt_tRNA_pseudc     | 5  | 134264017 | 134264081 |           |
| ENSG00000244388 | 0           | 0.390640832 | scRNA_pseudoge     | 19 | 47216612  | 47216683  |           |
| ENSG00000244393 | 0           | 0.390640832 | processed_transc   | 10 | 51253146  | 51371338  |           |
| ENSG00000244396 | 0           | 0.390640832 | tRNA_pseudogen     | 6  | 27228710  | 27228784  |           |
| ENSG00000244398 | 3.146112541 | 4.048652948 | pseudogene         | 11 | 16996240  | 16996560  |           |
| ENSG00000244405 | 9.153007996 | 9.286571792 | protein_coding     | 3  | 185764097 | 185828107 | ETV5      |
| ENSG00000244411 | 0.869158192 | 0.950786998 | protein_coding     | 11 | 71238313  | 71239210  | KRTAP5-7  |
| ENSG00000244416 | 0.499066092 | 1.353254395 | scRNA_pseudoge X   |    | 73462444  | 73462739  |           |
| ENSG00000244425 | 1.407729925 | 2.039052734 | scRNA_pseudoge     | 22 | 24221715  | 24221977  |           |
| ENSG00000244428 | 0           | 0.390640832 | rRNA_pseudogen Y   |    | 3005051   | 3005141   |           |
| ENSG00000244436 | 0           | 0.950786998 | pseudogene         | 12 | 32050754  | 32051042  |           |
| ENSG00000244439 | 2.35979773  | 2.652276565 | processed_transc X |    | 119745184 | 119754929 |           |
| ENSG00000244440 | 0.499066092 | 0.697730409 | scRNA_pseudoge     | 11 | 46801472  | 46801678  |           |
| ENSG00000244451 | 1.16343121  | 0.950786998 | pseudogene         | 11 | 129952390 | 129952676 | RPL34P21  |
| ENSG00000244456 | 0.499066092 | 0           | pseudogene         | 17 | 20859992  | 20861715  |           |
| ENSG00000244459 | 2.671945279 | 3.608232228 | lincRNA            | 4  | 1575789   | 1581980   |           |
| ENSG00000244462 | 10.14174685 | 9.922765621 | protein_coding     | 20 | 34236847  | 34252878  | RBM12     |
| ENSG00000244465 | 0.499066092 | 0           | scRNA_pseudoge     | 9  | 12731979  | 12732170  |           |
| ENSG00000244466 | 2.671945279 | 2.579085888 | rRNA_pseudogen     | 17 | 55868619  | 55868752  |           |
| ENSG00000244468 | 1.616589159 | 1.353254395 | antisense          | 3  | 149002569 | 149051440 |           |



|                 |             |             |                  |    |           |           |           |
|-----------------|-------------|-------------|------------------|----|-----------|-----------|-----------|
| ENSG00000244469 | 0           | 0.390640832 | tRNA_pseudogen   | 22 | 44546537  | 44546622  | TRNAU2    |
| ENSG00000244476 | 1.799000381 | 2.721932731 | protein_coding   | 6  | 11102722  | 11111965  | ERVFRD-1  |
| ENSG00000244479 | 2.671945279 | 1.667587519 | lincRNA          | 7  | 143948357 | 144053274 |           |
| ENSG00000244480 | 3.554067925 | 3.87606762  | pseudogene       | 7  | 30562759  | 30564151  |           |
| ENSG00000244482 | 3.448790144 | 3.608232228 | protein_coding   | 19 | 54720737  | 54747130  | LILRA6    |
| ENSG00000244484 | 0.499066092 | 0           | processed_transc | 1  | 153653277 | 153654268 |           |
| ENSG00000244485 | 0           | 0.390640832 | pseudogene       | 16 | 76268953  | 76269521  | RPL18P13  |
| ENSG00000244486 | 6.902274257 | 7.138927266 | protein_coding   | 22 | 20778874  | 20792146  | SCARF2    |
| ENSG00000244490 | 0.869158192 | 0.697730409 | pseudogene       | 7  | 104941969 | 104942533 | RWDD4P1   |
| ENSG00000244491 | 0.499066092 | 0.390640832 | processed_transc | 22 | 39130730  | 39134770  |           |
| ENSG00000244498 | 0           | 0.697730409 | processed_transc | 9  | 123970072 | 124027464 |           |
| ENSG00000244509 | 8.827781978 | 8.065104068 | protein_coding   | 22 | 39410088  | 39414931  | APOBEC3C  |
| ENSG00000244513 | 0.869158192 | 1.667587519 | antisense        | 3  | 69063272  | 69097812  |           |
| ENSG00000244515 | 1.799000381 | 1.353254395 | pseudogene       | 3  | 156880452 | 156881721 | KRT18P34  |
| ENSG00000244535 | 0.499066092 | 0.390640832 | pseudogene       | 11 | 32779814  | 32780160  |           |
| ENSG00000244538 | 2.35979773  | 2.721932731 | pseudogene       | 4  | 22595819  | 22596073  |           |
| ENSG00000244556 | 2.762599152 | 2.652276565 | pseudogene       | 7  | 128668943 | 128670581 |           |
| ENSG00000244558 | 1.799000381 | 2.144285137 | antisense        | 20 | 43323533  | 43374662  |           |
| ENSG00000244560 | 3.146112541 | 3.027231696 | pseudogene       | 7  | 148982372 | 148994403 |           |
| ENSG00000244567 | 4.352265886 | 4.127774132 | lincRNA          | 2  | 208686014 | 208687493 |           |
| ENSG00000244577 | 0           | 0.697730409 | scRNA_pseudoge   | 16 | 89452290  | 89452449  |           |
| ENSG00000244578 | 2.671945279 | 2.788380093 | processed_transc | 3  | 138654031 | 138662862 |           |
| ENSG00000244580 | 0.499066092 | 0.390640832 | rRNA_pseudogen   | 6  | 133593943 | 133594166 |           |
| ENSG00000244582 | 0           | 0.390640832 | pseudogene       | 17 | 21407884  | 21408385  |           |
| ENSG00000244585 | 1.16343121  | 0           | pseudogene       | 12 | 121354548 | 121355039 | RPL12P33  |
| ENSG00000244586 | 1.960915222 | 1.16600992  | antisense        | 3  | 55521727  | 55522336  | WNT5A-AS1 |
| ENSG00000244588 | 0.499066092 | 0.697730409 | protein_coding   | 20 | 1206700   | 1277065   | RAD21L1   |
| ENSG00000244591 | 0.499066092 | 0.390640832 | tRNA_pseudogen   | 1  | 147825689 | 147825760 | TRNAQ51P  |
| ENSG00000244593 | 0.499066092 | 0.697730409 | pseudogene       | 8  | 18240784  | 18241427  |           |
| ENSG00000244595 | 0           | 0.390640832 | scRNA_pseudoge   | 12 | 12275468  | 12275543  |           |
| ENSG00000244605 | 0.869158192 | 0.390640832 | scRNA_pseudoge   | 11 | 46801064  | 46801333  |           |
| ENSG00000244607 | 1.616589159 | 1.353254395 | protein_coding   | 3  | 42734155  | 42814745  | CCDC13    |
| ENSG00000244609 | 0.499066092 | 0.390640832 | scRNA_pseudoge   | 1  | 24063099  | 24063380  |           |
| ENSG00000244617 | 2.928422289 | 3.608232228 | protein_coding   | 2  | 70187226  | 70189397  | ASPRV1    |
| ENSG00000244618 | 0           | 0.697730409 | scRNA_pseudoge   | 6  | 25031221  | 25031510  |           |
| ENSG00000244619 | 0.499066092 | 0           | processed_transc | 1  | 145541593 | 145542229 |           |
| ENSG00000244623 | 0           | 0.697730409 | protein_coding   | 7  | 99473610  | 99474680  | OR2AE1    |
| ENSG00000244625 | 4.999881834 | 5.742946029 | processed_transc | 22 | 27068730  | 27176170  |           |
| ENSG00000244627 | 4.491309013 | 4.932754837 | pseudogene       | 22 | 38731767  | 38794934  |           |
| ENSG00000244630 | 0.499066092 | 0.390640832 | pseudogene       | 5  | 80151326  | 80151662  |           |
| ENSG00000244637 | 0.869158192 | 0.390640832 | rRNA_pseudogen   | 3  | 141773745 | 141774236 |           |
| ENSG00000244642 | 3.989024711 | 3.453019579 | scRNA_pseudoge   | 8  | 120874903 | 120875102 |           |
| ENSG00000244647 | 0           | 0.390640832 | rRNA_pseudogen   | 16 | 34983687  | 34983780  |           |
| ENSG00000244668 | 0.499066092 | 0.950786998 | pseudogene       | 3  | 150437784 | 150438623 |           |
| ENSG00000244671 | 0           | 0.697730409 | scRNA_pseudoge   | 22 | 22077190  | 22077451  |           |
| ENSG00000244675 | 4.165528823 | 3.781359661 | processed_transc | 3  | 194217053 | 194222232 |           |
| ENSG00000244676 | 0.869158192 | 0.697730409 | processed_transc | 21 | 19165805  | 19183162  |           |
| ENSG00000244677 | 0           | 0.390640832 | scRNA_pseudoge   | 14 | 68616335  | 68616625  |           |
| ENSG00000244681 | 0           | 0.950786998 | pseudogene       | 3  | 95373267  | 95402037  |           |
| ENSG00000244683 | 1.16343121  | 0.390640832 | rRNA_pseudogen   | 4  | 120158523 | 120158690 |           |
| ENSG00000244687 | 5.613019223 | 5.150490275 | protein_coding   | 20 | 48697661  | 48732496  | UBE2V1    |
| ENSG00000244691 | 0.869158192 | 1.16600992  | pseudogene       | 14 | 103878456 | 103879098 |           |
| ENSG00000244694 | 1.799000381 | 0           | protein_coding   | 6  | 47845764  | 48036425  | C6orf138  |
| ENSG00000244697 | 0           | 1.16600992  | processed_transc | 1  | 222817657 | 222856105 |           |
| ENSG00000244701 | 4.097495944 | 4.274079748 | processed_transc | 7  | 141352181 | 141356610 |           |
| ENSG00000244703 | 0.499066092 | 0           | pseudogene       | 1  | 207818579 | 207830755 | CD46P1    |
| ENSG00000244705 | 0           | 0.390640832 | pseudogene       | 15 | 40604553  | 40605490  |           |
| ENSG00000244710 | 0           | 0.390640832 | scRNA_pseudoge   | 6  | 106731288 | 106731586 |           |
| ENSG00000244712 | 1.16343121  | 1.353254395 | pseudogene       | 12 | 28717611  | 28718074  |           |
| ENSG00000244716 | 0.499066092 | 0           | pseudogene       | 1  | 109534878 | 109535489 |           |
| ENSG00000244722 | 1.616589159 | 1.518964905 | pseudogene       | 3  | 110401133 | 110402001 |           |
| ENSG00000244723 | 2.928422289 | 2.721932731 | pseudogene       | 22 | 23991400  | 23995521  | ASLP1     |
| ENSG00000244731 | 2.671945279 | 3.679994897 | protein_coding   | 6  | 31949801  | 31970458  | C4A       |

|                 |             |             |                  |    |           |                    |
|-----------------|-------------|-------------|------------------|----|-----------|--------------------|
| ENSG00000244733 | 3.502389126 | 3.679994897 | lincRNA          | 10 | 81420645  | 81436855           |
| ENSG00000244748 | 0           | 0.390640832 | scRNA_pseudoge   | 5  | 71610224  | 71610510           |
| ENSG00000244752 | 2.671945279 | 2.334191469 | protein_coding   | 22 | 25615489  | 25627836 CRYBB2    |
| ENSG00000244754 | 8.3480754   | 7.57982176  | protein_coding   | 13 | 33006924  | 33112970 N4BP2L2   |
| ENSG00000244758 | 0           | 0.390640832 | lincRNA          | 7  | 19757     | 35479              |
| ENSG00000244791 | 1.16343121  | 0.697730409 | lincRNA          | 8  | 127337740 | 127341780          |
| ENSG00000244879 | 5.967663407 | 6.535085617 | processed_transc | 15 | 50647156  | 50659636           |
| ENSG00000244921 | 3.335220907 | 2.912743273 | pseudogene       | 5  | 134258993 | 134259739          |
| ENSG00000244926 | 2.57521082  | 2.501982735 | antisense        | 11 | 43930842  | 43942494           |
| ENSG00000244932 | 2.847891871 | 3.027231696 | pseudogene       | 3  | 129100141 | 129112992          |
| ENSG00000244945 | 2.762599152 | 2.242360793 | antisense        | 5  | 179022905 | 179030742          |
| ENSG00000244952 | 1.16343121  | 1.667587519 | lincRNA          | 15 | 32905934  | 32907312           |
| ENSG00000244968 | 3.004694206 | 2.721932731 | lincRNA          | 5  | 38556888  | 38671318 LIFR-AS1  |
| ENSG00000244998 | 0.499066092 | 1.16600992  | processed_transc | 8  | 142400039 | 142402674          |
| ENSG00000245017 | 0.499066092 | 1.667587519 | protein_coding   | 12 | 98879322  | 98897633           |
| ENSG00000245025 | 1.960915222 | 1.802319292 | processed_transc | 8  | 22842109  | 22876848           |
| ENSG00000245059 | 0.869158192 | 1.518964905 | lincRNA          | 16 | 81110924  | 81112466           |
| ENSG00000245060 | 6.103936836 | 5.94580061  | lincRNA          | 5  | 180257957 | 180262726          |
| ENSG00000245067 | 0           | 1.353254395 | antisense        | 4  | 57975928  | 58071676           |
| ENSG00000245080 | 0.499066092 | 0.390640832 | processed_transc | 8  | 96079036  | 96085410           |
| ENSG00000245105 | 2.10647801  | 0.950786998 | processed_transc | 12 | 9217773   | 9220651            |
| ENSG00000245146 | 2.57521082  | 2.788380093 | lincRNA          | 5  | 139452442 | 139488215          |
| ENSG00000245148 | 1.799000381 | 2.242360793 | antisense        | 11 | 72411519  | 72416652 ARAP1-AS2 |
| ENSG00000245149 | 4.568725997 | 4.547834947 | processed_transc | 8  | 125474726 | 125486817          |
| ENSG00000245156 | 2.35979773  | 3.081239798 | lincRNA          | 11 | 66037303  | 66045996           |
| ENSG00000245205 | 2.762599152 | 2.652276565 | pseudogene       | 12 | 19609178  | 19610582           |
| ENSG00000245213 | 4.437288965 | 4.075511708 | processed_transc | 4  | 174053079 | 174090803          |
| ENSG00000245248 | 5.286269488 | 5.393992    | protein_coding   | 11 | 119252520 | 119397374          |
| ENSG00000245275 | 2.57521082  | 2.971122874 | lincRNA          | 5  | 153708997 | 153825410          |
| ENSG00000245281 | 1.16343121  | 2.420525079 | processed_transc | 8  | 17942377  | 17953903           |
| ENSG00000245293 | 0.869158192 | 1.16600992  | antisense        | 4  | 108784635 | 108899955          |
| ENSG00000245311 | 0.499066092 | 0.390640832 | antisense        | 12 | 27542722  | 27599558           |
| ENSG00000245317 | 2.35979773  | 2.501982735 | protein_coding   | 5  | 179286013 | 179288283          |
| ENSG00000245322 | 1.16343121  | 0.697730409 | antisense        | 4  | 100871163 | 101116256          |
| ENSG00000245330 | 0.499066092 | 0.390640832 | processed_transc | 8  | 120879659 | 120886728          |
| ENSG00000245468 | 0.869158192 | 0           | processed_transc | 4  | 7102967   | 7105112            |
| ENSG00000245479 | 0           | 0.950786998 | sense_overlappin | 15 | 91203465  | 91208198           |
| ENSG00000245498 | 2.671945279 | 3.027231696 | processed_transc | 11 | 124670346 | 124704383          |
| ENSG00000245522 | 2.928422289 | 4.250702764 | processed_transc | 11 | 9776317   | 9781080            |
| ENSG00000245526 | 1.616589159 | 2.420525079 | lincRNA          | 5  | 87803363  | 87986858 LINC00461 |
| ENSG00000245532 | 12.17497428 | 12.86322656 | lincRNA          | 11 | 65190245  | 65213011 NEAT1     |
| ENSG00000245534 | 1.616589159 | 1.518964905 | antisense        | 15 | 60771377  | 60922836           |
| ENSG00000245552 | 1.16343121  | 1.667587519 | processed_transc | 11 | 94883703  | 94967268           |
| ENSG00000245556 | 5.223818625 | 5.306006045 | lincRNA          | 5  | 77638189  | 77656331           |
| ENSG00000245562 | 0           | 0.697730409 | processed_transc | 4  | 7096298   | 7105107            |
| ENSG00000245571 | 4.437288965 | 4.585695337 | lincRNA          | 11 | 58897606  | 58910488           |
| ENSG00000245573 | 2.762599152 | 2.579085888 | processed_transc | 11 | 27528385  | 27719721 BDNF-AS1  |
| ENSG00000245598 | 1.616589159 | 0.697730409 | processed_transc | 19 | 47163621  | 47180704           |
| ENSG00000245600 | 4.062237333 | 4.65855978  | antisense        | 16 | 30538239  | 30539615           |
| ENSG00000245614 | 3.652182994 | 4.468996429 | processed_transc | 12 | 31173697  | 31226781           |
| ENSG00000245648 | 1.407729925 | 2.420525079 | lincRNA          | 12 | 10516368  | 10551105           |
| ENSG00000245651 | 0           | 0.390640832 | lincRNA          | 12 | 58263618  | 58290265           |
| ENSG00000245667 | 0           | 0.697730409 | antisense        | 12 | 6652670   | 6654097            |
| ENSG00000245680 | 5.60078458  | 5.808454063 | protein_coding   | 19 | 37675722  | 37709055 ZNF585B   |
| ENSG00000245685 | 1.799000381 | 2.144285137 | processed_transc | 4  | 190701490 | 190861426          |
| ENSG00000245688 | 0           | 0.390640832 | sense_intronic   | 5  | 177865682 | 177870095          |
| ENSG00000245694 | 6.407685389 | 7.255086103 | antisense        | 16 | 54951749  | 54963101 CRNDE     |
| ENSG00000245711 | 3.652182994 | 2.721932731 | antisense        | 5  | 36221157  | 36222004           |
| ENSG00000245748 | 1.16343121  | 1.667587519 | processed_transc | 4  | 7032281   | 7047958            |
| ENSG00000245750 | 1.407729925 | 0.950786998 | lincRNA          | 15 | 69755365  | 69863775           |
| ENSG00000245768 | 0.499066092 | 1.16600992  | lincRNA          | 16 | 58767816  | 59142878           |
| ENSG00000245848 | 1.407729925 | 1.16600992  | protein_coding   | 19 | 33790840  | 33793470 CEBPA     |
| ENSG00000245849 | 4.962122459 | 4.468996429 | processed_transc | 15 | 40978922  | 40987305           |

|                 |             |             |                  |    |           |                       |
|-----------------|-------------|-------------|------------------|----|-----------|-----------------------|
| ENSG00000245856 | 2.762599152 | 1.518964905 | antisense        | 12 | 10370462  | 10372350              |
| ENSG00000245857 | 0.499066092 | 0.390640832 | processed_transc | 8  | 6693076   | 6742798               |
| ENSG00000245869 | 1.16343121  | 0.390640832 | protein_coding   | 11 | 118756550 | 118758451             |
| ENSG00000245888 | 1.616589159 | 2.242360793 | protein_coding   | 16 | 27279526  | 27301813              |
| ENSG00000245904 | 2.238690726 | 2.144285137 | antisense        | 12 | 92539349  | 92583436              |
| ENSG00000245910 | 9.239397198 | 9.827720232 | processed_transc | 8  | 67833919  | 67838633 SNHG6        |
| ENSG00000245928 | 0.499066092 | 0           | antisense        | 4  | 76901943  | 76927095              |
| ENSG00000245937 | 7.234712227 | 7.073814954 | lincRNA          | 5  | 127276118 | 127418792             |
| ENSG00000245954 | 0.499066092 | 0.390640832 | processed_transc | 4  | 153021906 | 153025872             |
| ENSG00000245958 | 5.458875168 | 5.816437314 | pseudogene       | 4  | 120375946 | 120473180             |
| ENSG00000245970 | 4.19837882  | 4.710890357 | antisense        | 8  | 99053954  | 99056349              |
| ENSG00000245975 | 2.35979773  | 1.667587519 | processed_transc | 15 | 59060271  | 59063173              |
| ENSG00000246016 | 0.499066092 | 0           | antisense        | 5  | 10479483  | 10482421              |
| ENSG00000246022 | 0           | 0.390640832 | processed_transc | 3  | 125898908 | 125929012 ALDH1L1-AS2 |
| ENSG00000246067 | 5.239686603 | 6.117167886 | lincRNA          | 11 | 82783108  | 82817761              |
| ENSG00000246082 | 5.83815965  | 4.319727133 | pseudogene       | 3  | 131080742 | 131083966             |
| ENSG00000246089 | 4.437288965 | 5.339632724 | processed_transc | 8  | 6261072   | 6264663               |
| ENSG00000246090 | 1.960915222 | 3.781359661 | processed_transc | 4  | 100010008 | 100222513             |
| ENSG00000246100 | 0.869158192 | 0.390640832 | lincRNA          | 11 | 115624966 | 115631345             |
| ENSG00000246115 | 2.10647801  | 2.579085888 | pseudogene       | 12 | 8664970   | 8665322               |
| ENSG00000246130 | 2.238690726 | 1.518964905 | processed_transc | 8  | 22925742  | 22941132              |
| ENSG00000246139 | 0.869158192 | 1.353254395 | lincRNA          | 12 | 125343129 | 125362549             |
| ENSG00000246145 | 0           | 0.697730409 | processed_transc | 8  | 67331824  | 67341212              |
| ENSG00000246174 | 3.077135474 | 3.781359661 | processed_transc | 11 | 77850817  | 77885023              |
| ENSG00000246203 | 3.004694206 | 3.279072565 | pseudogene       | 1  | 155584517 | 155630036             |
| ENSG00000246225 | 0.869158192 | 0.697730409 | non_coding       | 11 | 22850926  | 22966939              |
| ENSG00000246228 | 5.191549282 | 4.508954154 | antisense        | 8  | 128302062 | 128494384             |
| ENSG00000246250 | 2.928422289 | 2.144285137 | antisense        | 11 | 43851259  | 43902276              |
| ENSG00000246263 | 2.762599152 | 3.279072565 | antisense        | 8  | 103251622 | 103265561             |
| ENSG00000246273 | 5.072559152 | 5.545764946 | processed_transc | 11 | 9779839   | 9832866               |
| ENSG00000246308 | 4.261916566 | 4.566889334 | processed_transc | 11 | 10830844  | 10844478              |
| ENSG00000246323 | 0.499066092 | 0.697730409 | lincRNA          | 5  | 137368463 | 137372955             |
| ENSG00000246331 | 0.869158192 | 2.039052734 | processed_transc | 12 | 30908008  | 30933673              |
| ENSG00000246334 | 3.830412367 | 3.96493948  | lincRNA          | 5  | 176865504 | 176874700             |
| ENSG00000246339 | 2.471521042 | 2.242360793 | processed_transc | 8  | 28553718  | 28558981              |
| ENSG00000246350 | 0.499066092 | 0.950786998 | processed_transc | 6  | 28555155  | 28559524              |
| ENSG00000246363 | 0.499066092 | 0           | lincRNA          | 12 | 89404458  | 89413456              |
| ENSG00000246366 | 1.16343121  | 1.667587519 | protein_coding   | 8  | 71520812  | 71575514              |
| ENSG00000246375 | 0           | 0.950786998 | processed_transc | 4  | 89206094  | 89252573              |
| ENSG00000246379 | 1.16343121  | 2.721932731 | processed_transc | 16 | 56126899  | 56225006              |
| ENSG00000246394 | 0           | 0.390640832 | lincRNA          | 12 | 133609245 | 133613808             |
| ENSG00000246422 | 0.869158192 | 0.950786998 | antisense        | 5  | 140937878 | 140944830             |
| ENSG00000246451 | 5.763291843 | 4.932754837 | processed_transc | 14 | 104148699 | 104150352             |
| ENSG00000246465 | 2.35979773  | 2.579085888 | lincRNA          | 16 | 28296206  | 28303385              |
| ENSG00000246477 | 1.616589159 | 1.925536307 | protein_coding   | 8  | 11173374  | 11182938              |
| ENSG00000246523 | 1.616589159 | 1.353254395 | processed_transc | 11 | 86666754  | 86712001              |
| ENSG00000246526 | 2.10647801  | 1.802319292 | processed_transc | 4  | 6689175   | 6692246               |
| ENSG00000246528 | 3.211941663 | 3.781359661 | processed_transc | 8  | 70746346  | 70767206              |
| ENSG00000246548 | 2.10647801  | 2.039052734 | lincRNA          | 14 | 77507407  | 77535846              |
| ENSG00000246560 | 1.960915222 | 2.501982735 | processed_transc | 4  | 103749212 | 103765232             |
| ENSG00000246575 | 4.409500985 | 3.993387124 | pseudogene       | 2  | 85542164  | 85543652              |
| ENSG00000246582 | 5.525114348 | 5.045726316 | processed_transc | 8  | 23081984  | 23088439              |
| ENSG00000246596 | 1.799000381 | 2.420525079 | pseudogene       | 5  | 177046060 | 177099210             |
| ENSG00000246627 | 0.869158192 | 0           | antisense        | 12 | 2785167   | 2800366 CACNA1C-AS1   |
| ENSG00000246640 | 3.502389126 | 0.697730409 | processed_transc | 17 | 48127713  | 48133103              |
| ENSG00000246662 | 0.869158192 | 1.353254395 | processed_transc | 8  | 94225531  | 94712661 LINC00535    |
| ENSG00000246695 | 4.923348194 | 5.466810074 | antisense        | 12 | 26092262  | 26112698              |
| ENSG00000246705 | 9.333898174 | 9.940224002 | protein_coding   | 12 | 14927270  | 14930936 H2AFJ        |
| ENSG00000246731 | 3.077135474 | 4.385599336 | processed_transc | 17 | 72206119  | 72209481              |
| ENSG00000246740 | 2.471521042 | 2.039052734 | antisense        | 15 | 42264961  | 42291292              |
| ENSG00000246763 | 2.671945279 | 3.64455972  | antisense        | 5  | 98105322  | 98109173              |
| ENSG00000246777 | 0.499066092 | 1.518964905 | lincRNA          | 16 | 66785655  | 66788643              |
| ENSG00000246792 | 1.960915222 | 2.144285137 | processed_transc | 8  | 91658669  | 91668826              |

|                 |             |             |                  |    |           |                     |
|-----------------|-------------|-------------|------------------|----|-----------|---------------------|
| ENSG00000246851 | 2.35979773  | 1.802319292 | antisense        | 9  | 134065297 | 134069592           |
| ENSG00000246859 | 4.883502971 | 5.878761167 | lincRNA          | 5  | 110847924 | 111075423           |
| ENSG00000246863 | 1.16343121  | 0.697730409 | processed_transc | 15 | 40213243  | 40218081            |
| ENSG00000246877 | 3.448790144 | 2.971122874 | antisense        | 15 | 76020011  | 76030964            |
| ENSG00000246889 | 4.097495944 | 4.29708397  | antisense        | 11 | 70218352  | 70244594            |
| ENSG00000246898 | 3.989024711 | 4.810179682 | lincRNA          | 16 | 66442427  | 66446038            |
| ENSG00000246922 | 5.472368541 | 5.47691899  | protein_coding   | 15 | 65385338  | 65407535 UBAP1L     |
| ENSG00000246982 | 1.960915222 | 3.493416095 | processed_transc | 6  | 36114475  | 36164982            |
| ENSG00000246985 | 2.35979773  | 2.971122874 | processed_transc | 12 | 93936239  | 93965544            |
| ENSG00000247077 | 9.633212506 | 8.942603846 | protein_coding   | 12 | 133287405 | 133299228 PGAM5     |
| ENSG00000247081 | 2.928422289 | 3.027231696 | processed_transc | 8  | 104169218 | 104311000           |
| ENSG00000247092 | 5.60078458  | 5.893930351 | ncrna_host       | 14 | 95998634  | 96001209 SNHG10     |
| ENSG00000247095 | 5.977159882 | 6.520498852 | processed_transc | 11 | 565660    | 568457 MIR210HG     |
| ENSG00000247121 | 1.616589159 | 2.420525079 | protein_coding   | 5  | 96149731  | 96271513            |
| ENSG00000247131 | 0           | 0.390640832 | antisense        | 12 | 70107413  | 70132348            |
| ENSG00000247134 | 4.322773689 | 5.271576845 | processed_transc | 8  | 32853696  | 32902373            |
| ENSG00000247137 | 4.352265886 | 4.903073497 | lincRNA          | 11 | 82902071  | 82904836            |
| ENSG00000247151 | 0.869158192 | 1.802319292 | non_coding       | 11 | 33183203  | 33213144            |
| ENSG00000247157 | 1.799000381 | 2.144285137 | processed_transc | 12 | 11700964  | 11743303            |
| ENSG00000247199 | 0           | 0.390640832 | lincRNA          | 5  | 147647870 | 147763346           |
| ENSG00000247213 | 0.499066092 | 0.390640832 | processed_transc | 12 | 108827907 | 108886362           |
| ENSG00000247228 | 6.005279909 | 6.252780742 | antisense        | 16 | 70190243  | 70207351            |
| ENSG00000247240 | 4.6658819   | 4.508954154 | antisense        | 15 | 74753606  | 74773643            |
| ENSG00000247270 | 1.16343121  | 0.697730409 | lincRNA          | 16 | 66516775  | 66519747            |
| ENSG00000247271 | 5.718698586 | 5.486957566 | processed_transc | 11 | 10879806  | 10928349            |
| ENSG00000247311 | 0.869158192 | 0.390640832 | antisense        | 5  | 121464457 | 121490551           |
| ENSG00000247317 | 4.381167248 | 4.048652948 | processed_transc | 8  | 144063155 | 144099854           |
| ENSG00000247324 | 0           | 0.950786998 | antisense        | 16 | 71496181  | 71499844            |
| ENSG00000247345 | 0.499066092 | 0           | antisense        | 5  | 58335588  | 58359330            |
| ENSG00000247363 | 1.616589159 | 1.518964905 | lincRNA          | 12 | 69068151  | 69081535            |
| ENSG00000247373 | 2.238690726 | 3.081239798 | lincRNA          | 12 | 124066767 | 124069662           |
| ENSG00000247400 | 4.322773689 | 4.693656882 | processed_transc | 13 | 96325089  | 96329179 DNAJC3-AS1 |
| ENSG00000247473 | 0.499066092 | 2.420525079 | antisense        | 11 | 3050624   | 3062490 CARS-AS1    |
| ENSG00000247498 | 5.498982484 | 5.863430791 | antisense        | 12 | 13080660  | 13137579            |
| ENSG00000247516 | 5.785082014 | 6.510691757 | lincRNA          | 5  | 8457606   | 8460776             |
| ENSG00000247556 | 9.825536602 | 9.617635386 | processed_transc | 15 | 41576188  | 41601901 OIP5-AS1   |
| ENSG00000247570 | 0.499066092 | 0           | pseudogene       | 8  | 70855183  | 70856883            |
| ENSG00000247572 | 5.795854912 | 5.555337277 | processed_transc | 5  | 80499915  | 80597379            |
| ENSG00000247595 | 3.502389126 | 4.385599336 | processed_transc | 11 | 18621334  | 18631802            |
| ENSG00000247596 | 7.935731106 | 7.593823731 | protein_coding   | 3  | 52262626  | 52273177 TWF2       |
| ENSG00000247624 | 2.238690726 | 0.390640832 | processed_transc | 4  | 14911585  | 15003669            |
| ENSG00000247626 | 8.074911866 | 7.644032061 | protein_coding   | 2  | 198570087 | 198573113 MARS2     |
| ENSG00000247627 | 10.77354482 | 10.02921141 | pseudogene       | 5  | 134262350 | 134263726 MTND4P12  |
| ENSG00000247629 | 2.10647801  | 2.334191469 | lincRNA          | 11 | 73594907  | 73597748            |
| ENSG00000247675 | 1.960915222 | 2.501982735 | processed_transc | 11 | 46867963  | 46895947            |
| ENSG00000247679 | 4.593635215 | 3.96493948  | antisense        | 5  | 177038254 | 177046755           |
| ENSG00000247699 | 0           | 0.390640832 | antisense        | 5  | 159622751 | 159631833           |
| ENSG00000247708 | 2.762599152 | 3.183544561 | processed_transc | 4  | 4543858   | 4639631             |
| ENSG00000247728 | 2.847891871 | 3.453019579 | antisense        | 15 | 30909201  | 30917976            |
| ENSG00000247735 | 3.502389126 | 3.993387124 | antisense        | 16 | 29938157  | 29940254            |
| ENSG00000247746 | 2.35979773  | 0.950786998 | protein_coding X | 5  | 55511049  | 55515635 USP51      |
| ENSG00000247763 | 0.499066092 | 1.16600992  | pseudogene       | 5  | 43231914  | 43233275            |
| ENSG00000247765 | 1.799000381 | 1.16600992  | lincRNA          | 15 | 21941147  | 21968151            |
| ENSG00000247774 | 2.10647801  | 1.353254395 | processed_transc | 12 | 47599681  | 47610239            |
| ENSG00000247796 | 5.827699195 | 5.84793576  | lincRNA          | 5  | 52405672  | 52410956            |
| ENSG00000247809 | 1.960915222 | 2.851901313 | antisense        | 15 | 96670598  | 96870590            |
| ENSG00000247828 | 5.107569429 | 5.372493443 | lincRNA          | 5  | 87564712  | 87732502            |
| ENSG00000247853 | 3.393122761 | 2.501982735 | ncrna_host       | 12 | 6687788   | 6693905             |
| ENSG00000247872 | 1.16343121  | 0.390640832 | pseudogene       | 5  | 816461    | 817116              |
| ENSG00000247877 | 0.499066092 | 1.16600992  | lincRNA          | 5  | 99785458  | 99870966            |
| ENSG00000247903 | 3.502389126 | 2.971122874 | antisense        | 12 | 27124519  | 27132515            |
| ENSG00000247934 | 1.16343121  | 1.802319292 | antisense        | 12 | 28316231  | 28343299            |
| ENSG00000247950 | 1.799000381 | 2.579085888 | processed_transc | 4  | 110268631 | 110354973           |

|                 |             |             |                  |    |           |                     |
|-----------------|-------------|-------------|------------------|----|-----------|---------------------|
| ENSG00000247970 | 0           | 0.390640832 | lincRNA          | 14 | 100070893 | 100092077           |
| ENSG00000247982 | 3.393122761 | 4.17820932  | lincRNA          | 15 | 57592563  | 57599959            |
| ENSG00000248008 | 6.435508026 | 6.911866869 | processed_transc | 12 | 120928131 | 120933743           |
| ENSG00000248015 | 4.19837882  | 4.489113623 | antisense        | 19 | 1392169   | 1396466             |
| ENSG00000248019 | 2.10647801  | 3.027231696 | antisense        | 4  | 89630940  | 89651254 FAM13A-AS1 |
| ENSG00000248027 | 1.960915222 | 2.501982735 | processed_transc | 11 | 100554893 | 100558686           |
| ENSG00000248044 | 6.014532757 | 6.398170093 | lincRNA          | 5  | 36864527  | 36876759            |
| ENSG00000248049 | 6.693459083 | 7.373448694 | processed_transc | 4  | 68566998  | 68946670            |
| ENSG00000248079 | 1.616589159 | 2.652276565 | lincRNA          | 15 | 35838396  | 36151202            |
| ENSG00000248092 | 3.146112541 | 1.925536307 | lincRNA          | 5  | 43575425  | 43603332            |
| ENSG00000248098 | 4.517578978 | 4.547834947 | protein_coding   | 19 | 41903365  | 41937250 BCKDHA     |
| ENSG00000248099 | 3.78787645  | 2.579085888 | protein_coding   | 19 | 17927324  | 17932383 INSL3      |
| ENSG00000248100 | 0           | 0.697730409 | lincRNA          | 12 | 27699983  | 27705706            |
| ENSG00000248112 | 2.847891871 | 0           | lincRNA          | 5  | 82215195  | 82216938            |
| ENSG00000248113 | 0           | 0.697730409 | pseudogene       | 4  | 83501273  | 83502537            |
| ENSG00000248115 | 0           | 0.697730409 | antisense        | 4  | 53811816  | 53824254            |
| ENSG00000248121 | 1.16343121  | 1.353254395 | pseudogene       | 17 | 28927883  | 28948040            |
| ENSG00000248124 | 3.146112541 | 4.021284656 | pseudogene       | 16 | 21807951  | 21831731 RRN3P1     |
| ENSG00000248126 | 0.499066092 | 0.697730409 | pseudogene       | 5  | 1598242   | 1598362             |
| ENSG00000248132 | 0.499066092 | 1.518964905 | lincRNA          | 5  | 57403459  | 57418168            |
| ENSG00000248150 | 0           | 0.697730409 | lincRNA          | 5  | 16373470  | 16440190            |
| ENSG00000248152 | 0           | 0.390640832 | antisense        | 4  | 113900746 | 113993118           |
| ENSG00000248155 | 1.16343121  | 0           | pseudogene       | 4  | 2609597   | 2609873             |
| ENSG00000248159 | 1.407729925 | 1.16600992  | pseudogene       | 8  | 30094898  | 30098513            |
| ENSG00000248161 | 2.762599152 | 3.813624741 | processed_transc | 4  | 103339759 | 103371167           |
| ENSG00000248162 | 0           | 0.390640832 | pseudogene       | 4  | 165646462 | 165647858           |
| ENSG00000248175 | 4.689181911 | 3.532712221 | lincRNA          | 5  | 114539713 | 114541943           |
| ENSG00000248180 | 0.869158192 | 1.667587519 | pseudogene       | 4  | 88128244  | 88129238 GAPDHP60   |
| ENSG00000248187 | 1.799000381 | 0.950786998 | lincRNA          | 4  | 129489127 | 129491686           |
| ENSG00000248196 | 1.616589159 | 0.390640832 | pseudogene       | 4  | 88087996  | 88088886            |
| ENSG00000248201 | 0.499066092 | 0.390640832 | processed_transc | 1  | 112999440 | 113006078           |
| ENSG00000248208 | 0.499066092 | 1.16600992  | pseudogene       | 4  | 154579724 | 154580805           |
| ENSG00000248213 | 1.799000381 | 1.667587519 | pseudogene       | 4  | 119558111 | 119559179 CICIP16   |
| ENSG00000248216 | 0.499066092 | 0           | pseudogene       | 5  | 37505790  | 37506959            |
| ENSG00000248221 | 0           | 0.390640832 | sense_intronic   | 4  | 4477848   | 4483427 STX18-IT1   |
| ENSG00000248228 | 0           | 0.390640832 | sense_intronic   | 4  | 20393812  | 20396479 SLIT2-IT1  |
| ENSG00000248235 | 0           | 0.390640832 | protein_coding   | 8  | 22446787  | 22459597            |
| ENSG00000248240 | 0.499066092 | 0           | antisense        | 5  | 43515376  | 43525412            |
| ENSG00000248243 | 2.35979773  | 1.667587519 | lincRNA          | 3  | 129808276 | 129813147           |
| ENSG00000248256 | 1.16343121  | 1.353254395 | antisense        | 4  | 48854025  | 48862220 OCIAD1-AS1 |
| ENSG00000248257 | 0           | 1.518964905 | pseudogene       | 19 | 43348511  | 43359771 PSG10P     |
| ENSG00000248265 | 3.335220907 | 5.200150955 | lincRNA          | 12 | 54452038  | 54516018            |
| ENSG00000248271 | 0           | 0.950786998 | pseudogene       | 5  | 57457024  | 57457579 PGAM1P1    |
| ENSG00000248275 | 4.568725997 | 4.961837817 | antisense        | 5  | 180688213 | 180699308           |
| ENSG00000248278 | 1.407729925 | 1.353254395 | pseudogene       | 17 | 46952222  | 46986345            |
| ENSG00000248279 | 0.869158192 | 0.390640832 | lincRNA          | 5  | 32947549  | 32962573            |
| ENSG00000248280 | 1.16343121  | 0.950786998 | pseudogene       | 4  | 120361716 | 120371312           |
| ENSG00000248288 | 0.499066092 | 1.353254395 | pseudogene       | 5  | 64505748  | 64506775            |
| ENSG00000248309 | 1.616589159 | 1.16600992  | lincRNA          | 5  | 88179145  | 88762215            |
| ENSG00000248323 | 7.437505974 | 8.001751392 | lincRNA          | 5  | 90598846  | 90610219            |
| ENSG00000248327 | 0           | 0.390640832 | pseudogene       | 4  | 166468684 | 166472212           |
| ENSG00000248333 | 7.950269163 | 7.603083446 | pseudogene       | 1  | 1571100   | 1588935 CDK11B      |
| ENSG00000248334 | 4.026095388 | 4.385599336 | pseudogene       | 15 | 28982729  | 29002537 WHAMMP2    |
| ENSG00000248335 | 0           | 0.697730409 | antisense        | 4  | 141633322 | 141637235           |
| ENSG00000248340 | 0           | 0.390640832 | pseudogene       | 4  | 26875264  | 26875972            |
| ENSG00000248356 | 0           | 0.697730409 | antisense        | 4  | 146563488 | 146571776           |
| ENSG00000248362 | 0           | 1.667587519 | antisense        | 5  | 147265649 | 147266441           |
| ENSG00000248367 | 2.847891871 | 3.183544561 | antisense        | 5  | 179720245 | 179722253           |
| ENSG00000248370 | 2.10647801  | 0.950786998 | lincRNA          | 4  | 189081219 | 189082293           |
| ENSG00000248371 | 0           | 0.390640832 | lincRNA          | 5  | 71869947  | 71956496            |
| ENSG00000248374 | 0.499066092 | 0.390640832 | pseudogene       | 3  | 143339370 | 143346532           |
| ENSG00000248375 | 1.616589159 | 1.16600992  | pseudogene       | 4  | 53586248  | 53586998            |
| ENSG00000248380 | 0.499066092 | 1.353254395 | antisense        | 17 | 48553180  | 48555752            |

|                 |             |             |                  |    |           |           |              |
|-----------------|-------------|-------------|------------------|----|-----------|-----------|--------------|
| ENSG00000248383 | 4.543379137 | 4.585695337 | protein_coding   | 5  | 140306302 | 140391929 | PCDHAC1      |
| ENSG00000248394 | 0           | 1.353254395 | pseudogene       | 4  | 129076544 | 129077359 |              |
| ENSG00000248399 | 0.869158192 | 0           | sense_intronic   | 4  | 2465524   | 2465851   |              |
| ENSG00000248400 | 0.869158192 | 0.390640832 | pseudogene       | 5  | 82264707  | 82272963  | ST13P12      |
| ENSG00000248401 | 0.869158192 | 1.667587519 | pseudogene       | 4  | 84168331  | 84169334  |              |
| ENSG00000248405 | 2.238690726 | 0           | protein_coding   | 22 | 45098113  | 45258586  | PRR5-ARHGAP8 |
| ENSG00000248408 | 0.869158192 | 0.950786998 | lincRNA          | 4  | 80584915  | 80617991  |              |
| ENSG00000248415 | 0.499066092 | 0.697730409 | pseudogene       | 15 | 64820866  | 64821870  | GAPDHP61     |
| ENSG00000248416 | 0.499066092 | 1.353254395 | antisense        | 4  | 716064    | 717823    |              |
| ENSG00000248428 | 0.499066092 | 0           | processed_transc | 5  | 110306650 | 110344598 |              |
| ENSG00000248429 | 2.238690726 | 0.697730409 | processed_transc | 4  | 159091904 | 159124029 |              |
| ENSG00000248432 | 0           | 0.390640832 | lincRNA          | 4  | 112725574 | 112730850 |              |
| ENSG00000248433 | 0           | 0.390640832 | pseudogene       | 1  | 142697653 | 142713881 |              |
| ENSG00000248444 | 0           | 0.390640832 | pseudogene       | 4  | 24773089  | 24774042  |              |
| ENSG00000248445 | 2.35979773  | 1.925536307 | antisense        | 5  | 115783243 | 115843972 |              |
| ENSG00000248449 | 3.554067925 | 3.608232228 | pseudogene       | 5  | 140805853 | 140808219 | PCDHGB8P     |
| ENSG00000248453 | 3.274897671 | 1.518964905 | pseudogene       | 19 | 15947287  | 15947865  |              |
| ENSG00000248455 | 0.499066092 | 0           | lincRNA          | 5  | 17404128  | 17441803  |              |
| ENSG00000248468 | 0.869158192 | 1.16600992  | antisense        | 3  | 131236675 | 131239724 |              |
| ENSG00000248476 | 1.407729925 | 1.925536307 | sense_intronic   | 21 | 30723955  | 30734215  | BACH1-IT1    |
| ENSG00000248482 | 0           | 0.697730409 | lincRNA          | 5  | 134460070 | 134466939 |              |
| ENSG00000248483 | 0.499066092 | 1.16600992  | pseudogene       | 5  | 93076284  | 93077268  | POU5F2       |
| ENSG00000248485 | 1.16343121  | 1.667587519 | protein_coding   | 1  | 161228517 | 161255240 | PCP4L1       |
| ENSG00000248487 | 4.962122459 | 5.248158938 | protein_coding   | 3  | 52005442  | 52015212  | ABHD14A      |
| ENSG00000248489 | 0.869158192 | 1.518964905 | processed_transc | 5  | 98264875  | 98330717  |              |
| ENSG00000248493 | 0           | 0.390640832 | pseudogene       | 5  | 145376781 | 145377566 |              |
| ENSG00000248498 | 0.499066092 | 0.697730409 | pseudogene       | 8  | 47490835  | 47526145  | ASNSP1       |
| ENSG00000248503 | 0           | 1.518964905 | pseudogene       | X  | 77218050  | 77218386  |              |
| ENSG00000248508 | 5.018397273 | 4.528525526 | processed_transc | 15 | 40331512  | 40359491  |              |
| ENSG00000248514 | 0.869158192 | 0           | antisense        | 5  | 180632361 | 180633120 |              |
| ENSG00000248516 | 0.499066092 | 0           | lincRNA          | 4  | 4323689   | 4335909   |              |
| ENSG00000248527 | 5.175139844 | 4.29708397  | pseudogene       | 1  | 569076    | 569756    |              |
| ENSG00000248530 | 0.499066092 | 0           | pseudogene       | 3  | 131245291 | 131246023 |              |
| ENSG00000248538 | 2.35979773  | 0.697730409 | lincRNA          | 8  | 9046521   | 9060364   |              |
| ENSG00000248539 | 0.499066092 | 0           | lincRNA          | 5  | 37899465  | 37920971  |              |
| ENSG00000248554 | 0.869158192 | 1.16600992  | antisense        | 5  | 43511160  | 43521913  |              |
| ENSG00000248557 | 1.616589159 | 1.802319292 | pseudogene       | 3  | 126343635 | 126344904 |              |
| ENSG00000248559 | 1.616589159 | 1.925536307 | antisense        | 5  | 133735186 | 133737612 |              |
| ENSG00000248564 | 1.616589159 | 0           | pseudogene       | 4  | 331886    | 332372    |              |
| ENSG00000248568 | 0           | 0.390640832 | pseudogene       | 5  | 146085944 | 146087163 |              |
| ENSG00000248569 | 0.499066092 | 0.697730409 | pseudogene       | 5  | 79646840  | 79647775  |              |
| ENSG00000248571 | 0.499066092 | 0.390640832 | antisense        | 4  | 153587520 | 153591259 |              |
| ENSG00000248576 | 0.869158192 | 0.950786998 | antisense        | 12 | 54556923  | 54562379  |              |
| ENSG00000248578 | 0.499066092 | 0.697730409 | pseudogene       | 8  | 57013758  | 57014826  | NPM1P21      |
| ENSG00000248586 | 0           | 0.390640832 | pseudogene       | 5  | 56613816  | 56615847  |              |
| ENSG00000248593 | 5.431503808 | 5.09905904  | pseudogene       | 12 | 6994062   | 6994848   | DSTNP2       |
| ENSG00000248596 | 1.407729925 | 1.802319292 | lincRNA          | 5  | 175570088 | 175626298 |              |
| ENSG00000248599 | 0.499066092 | 0.390640832 | lincRNA          | 8  | 102064282 | 102088479 |              |
| ENSG00000248603 | 6.26766507  | 6.332882496 | processed_transc | 22 | 31497862  | 31500743  |              |
| ENSG00000248605 | 0           | 0.390640832 | lincRNA          | 5  | 25404842  | 25446034  |              |
| ENSG00000248607 | 0.499066092 | 0           | antisense        | 3  | 125775766 | 125777071 |              |
| ENSG00000248610 | 0.869158192 | 1.16600992  | pseudogene       | 5  | 129475724 | 129477643 |              |
| ENSG00000248616 | 0           | 0.697730409 | pseudogene       | 5  | 136193317 | 136194031 |              |
| ENSG00000248625 | 0.499066092 | 0           | pseudogene       | 4  | 170753804 | 170754514 |              |
| ENSG00000248626 | 3.603959378 | 2.652276565 | pseudogene       | 5  | 159377500 | 159378505 | GAPDHP40     |
| ENSG00000248632 | 2.928422289 | 4.872768657 | pseudogene       | 4  | 165889739 | 165891154 |              |
| ENSG00000248641 | 2.928422289 | 2.334191469 | pseudogene       | 4  | 73964539  | 73964862  | HMGA1P2      |
| ENSG00000248643 | 3.393122761 | 3.714580548 | protein_coding   | 11 | 66384097  | 66413940  | RBM14-RBM4   |
| ENSG00000248645 | 0           | 0.390640832 | pseudogene       | 4  | 165859474 | 165861142 |              |
| ENSG00000248647 | 0.499066092 | 0.950786998 | antisense        | 5  | 148543518 | 148656339 |              |
| ENSG00000248648 | 0           | 1.518964905 | pseudogene       | 5  | 132338811 | 132339057 |              |
| ENSG00000248659 | 0.499066092 | 0           | pseudogene       | 3  | 129350862 | 129351335 |              |
| ENSG00000248664 | 0.499066092 | 0           | antisense        | 5  | 68408939  | 68432221  |              |

|                 |             |             |                  |    |           |                       |
|-----------------|-------------|-------------|------------------|----|-----------|-----------------------|
| ENSG00000248666 | 2.471521042 | 1.802319292 | processed_transc | 9  | 130455257 | 130477926             |
| ENSG00000248668 | 2.471521042 | 1.518964905 | processed_transc | 5  | 41870132  | 41871059 OXCT1-AS1    |
| ENSG00000248669 | 0           | 0.390640832 | pseudogene       | 4  | 4119652   | 4120011               |
| ENSG00000248671 | 2.671945279 | 3.133298822 | processed_transc | 11 | 71505409  | 71524905              |
| ENSG00000248677 | 1.407729925 | 1.925536307 | lincRNA          | 5  | 6686438   | 6707824               |
| ENSG00000248682 | 0.499066092 | 0.390640832 | sense_intronic   | 10 | 49718568  | 49719632 ARHGAP22-IT1 |
| ENSG00000248690 | 2.35979773  | 3.027231696 | antisense        | 8  | 122651533 | 122656933 HAS2-AS1    |
| ENSG00000248693 | 1.799000381 | 1.802319292 | lincRNA          | 5  | 18704542  | 18746282              |
| ENSG00000248694 | 0           | 0.390640832 | antisense        | 4  | 183693718 | 183695084             |
| ENSG00000248696 | 0           | 0.390640832 | pseudogene       | 5  | 149394348 | 149394717             |
| ENSG00000248697 | 0.869158192 | 0           | pseudogene       | 4  | 113377080 | 113378941             |
| ENSG00000248698 | 0           | 0.697730409 | processed_transc | 4  | 14113592  | 14141676              |
| ENSG00000248704 | 0           | 0.697730409 | pseudogene       | 7  | 63564471  | 63565673 MTND4P2      |
| ENSG00000248711 | 0           | 0.390640832 | pseudogene       | 7  | 40191212  | 40193750              |
| ENSG00000248712 | 1.799000381 | 2.334191469 | protein_coding   | 11 | 119060347 | 119067479 CCDC153     |
| ENSG00000248713 | 3.393122761 | 3.845183986 | protein_coding   | 4  | 100557686 | 100575805             |
| ENSG00000248714 | 0.499066092 | 0.697730409 | lincRNA          | 17 | 47438527  | 47447360              |
| ENSG00000248719 | 0.499066092 | 0.697730409 | antisense        | 4  | 81104434  | 81111323              |
| ENSG00000248721 | 2.10647801  | 2.144285137 | processed_transc | 5  | 131528679 | 131529261             |
| ENSG00000248722 | 0           | 0.390640832 | pseudogene       | 5  | 114738077 | 114738659 AK3P4       |
| ENSG00000248727 | 1.407729925 | 0           | protein_coding   | 5  | 55753622  | 55777773              |
| ENSG00000248730 | 0           | 0.390640832 | antisense        | 5  | 38282366  | 38291088 EGFLAM-AS4   |
| ENSG00000248734 | 1.407729925 | 3.027231696 | antisense        | 5  | 96120481  | 96121703              |
| ENSG00000248746 | 1.799000381 | 2.039052734 | polymorphic_pse  | 11 | 66313866  | 66330800 ACTN3        |
| ENSG00000248751 | 0           | 0.697730409 | protein_coding   | 22 | 30681227  | 30695471              |
| ENSG00000248758 | 0           | 0.697730409 | antisense        | 5  | 96523794  | 96537584              |
| ENSG00000248767 | 0.499066092 | 0           | lincRNA          | 7  | 331310    | 334388                |
| ENSG00000248773 | 0.869158192 | 0.950786998 | sense_intronic   | 3  | 140691586 | 140692097             |
| ENSG00000248774 | 0.499066092 | 1.925536307 | antisense        | 4  | 174243357 | 174250845             |
| ENSG00000248780 | 0.869158192 | 0.390640832 | pseudogene       | 4  | 40788127  | 40788727              |
| ENSG00000248785 | 0           | 0.950786998 | pseudogene       | 4  | 110594999 | 110595280 HIGD1AP14   |
| ENSG00000248787 | 2.57521082  | 1.925536307 | lincRNA          | 3  | 125626848 | 125629115             |
| ENSG00000248791 | 0           | 0.390640832 | pseudogene       | 5  | 14620129  | 14621422              |
| ENSG00000248794 | 1.407729925 | 1.16600992  | pseudogene       | 5  | 80538149  | 80538418              |
| ENSG00000248795 | 0.869158192 | 0           | pseudogene       | 4  | 139481858 | 139483095             |
| ENSG00000248809 | 0.499066092 | 0           | lincRNA          | 4  | 147030607 | 147043065             |
| ENSG00000248810 | 0           | 1.16600992  | lincRNA          | 4  | 142240604 | 142253772             |
| ENSG00000248827 | 0.869158192 | 0.950786998 | pseudogene       | 5  | 107060662 | 107062818             |
| ENSG00000248830 | 0           | 0.390640832 | pseudogene       | 19 | 35033367  | 35036300 ZNF807       |
| ENSG00000248832 | 0           | 1.518964905 | processed_transc | 20 | 49620194  | 49624577              |
| ENSG00000248835 | 5.090170488 | 4.489113623 | protein_coding   | 1  | 54635333  | 54637997              |
| ENSG00000248840 | 0.499066092 | 0.697730409 | pseudogene       | 4  | 3314239   | 3314577               |
| ENSG00000248843 | 0           | 0.390640832 | pseudogene       | 4  | 3325704   | 3326489               |
| ENSG00000248846 | 1.16343121  | 0.390640832 | lincRNA          | 5  | 65502040  | 65505275              |
| ENSG00000248850 | 0.499066092 | 0           | pseudogene       | 3  | 126390949 | 126392066             |
| ENSG00000248851 | 0           | 0.697730409 | pseudogene       | 4  | 16309079  | 16309790              |
| ENSG00000248854 | 0.499066092 | 0.950786998 | pseudogene       | 5  | 55134629  | 55135853              |
| ENSG00000248858 | 1.16343121  | 1.667587519 | processed_transc | 8  | 93711970  | 93891730              |
| ENSG00000248863 | 0.499066092 | 1.353254395 | pseudogene       | 4  | 140348131 | 140352037             |
| ENSG00000248865 | 0.499066092 | 1.353254395 | processed_transc | 12 | 40223927  | 40229562              |
| ENSG00000248866 | 1.407729925 | 3.714580548 | antisense        | 4  | 53525573  | 53527835              |
| ENSG00000248869 | 2.10647801  | 0           | lincRNA          | 4  | 137717877 | 138133953             |
| ENSG00000248873 | 0.869158192 | 1.667587519 | pseudogene       | 5  | 42465502  | 42468970              |
| ENSG00000248884 | 0.499066092 | 0           | lincRNA          | 5  | 67726254  | 67730308              |
| ENSG00000248885 | 0.869158192 | 1.353254395 | pseudogene       | 5  | 118462477 | 118464139             |
| ENSG00000248890 | 0           | 1.16600992  | processed_transc | 4  | 145564074 | 145582509             |
| ENSG00000248896 | 0           | 1.16600992  | processed_transc | 8  | 10586824  | 10628902              |
| ENSG00000248905 | 7.136425764 | 5.045726316 | protein_coding   | 15 | 33057747  | 33486897 FMN1         |
| ENSG00000248909 | 0.499066092 | 1.667587519 | pseudogene       | 5  | 77940088  | 77940668 HMGB1P21     |
| ENSG00000248916 | 0           | 0.950786998 | pseudogene       | 3  | 129041889 | 129044269 NUP210P3    |
| ENSG00000248923 | 5.072559152 | 4.676215056 | pseudogene       | 5  | 134260338 | 134262149 MTND5P11    |
| ENSG00000248925 | 0.869158192 | 1.667587519 | antisense        | 5  | 269973    | 271631                |
| ENSG00000248926 | 0           | 0.390640832 | pseudogene       | 4  | 78879154  | 78879934              |

|                 |             |             |                  |    |           |                   |
|-----------------|-------------|-------------|------------------|----|-----------|-------------------|
| ENSG00000248930 | 0.499066092 | 0           | pseudogene       | 5  | 72316527  | 72317106          |
| ENSG00000248932 | 1.960915222 | 3.411459265 | processed_transc | 3  | 139108657 | 139302161         |
| ENSG00000248936 | 0.869158192 | 1.16600992  | antisense        | 4  | 37589709  | 37590497          |
| ENSG00000248949 | 0.499066092 | 0           | lincRNA          | 5  | 946430    | 956635            |
| ENSG00000248951 | 2.238690726 | 0.697730409 | pseudogene       | 5  | 1370634   | 1371057           |
| ENSG00000248954 | 0           | 0.390640832 | processed_transc | 17 | 47964961  | 47978257          |
| ENSG00000248956 | 0           | 0.390640832 | pseudogene       | 4  | 78885094  | 78885665 HMGB1P44 |
| ENSG00000248964 | 1.407729925 | 0.390640832 | lincRNA          | 8  | 29672520  | 29712059          |
| ENSG00000248966 | 0.499066092 | 0.697730409 | pseudogene       | 5  | 110283728 | 110286479         |
| ENSG00000248968 | 1.407729925 | 0.950786998 | antisense        | 5  | 10248437  | 10250027          |
| ENSG00000248969 | 0           | 0.390640832 | antisense        | 5  | 35678586  | 35827120          |
| ENSG00000248971 | 2.671945279 | 2.579085888 | pseudogene       | 4  | 103649948 | 103651328 KRT8P46 |
| ENSG00000248975 | 0           | 0.390640832 | lincRNA          | 14 | 30421603  | 30766249          |
| ENSG00000248988 | 4.131913373 | 4.101879561 | pseudogene       | 4  | 159928271 | 159928987         |
| ENSG00000248996 | 2.10647801  | 1.925536307 | antisense        | 5  | 176921996 | 176930648         |
| ENSG00000249004 | 0           | 0.697730409 | pseudogene       | 4  | 148379876 | 148380473         |
| ENSG00000249006 | 0.499066092 | 0.390640832 | pseudogene       | 4  | 2090445   | 2092344           |
| ENSG00000249007 | 3.911897206 | 2.334191469 | processed_transc | 1  | 201980498 | 201984785         |
| ENSG00000249013 | 0           | 0.390640832 | pseudogene       | 4  | 156927630 | 156928140 FTH1P21 |
| ENSG00000249014 | 0.499066092 | 0.697730409 | pseudogene       | 5  | 75537817  | 75538229 HMGN2P4  |
| ENSG00000249019 | 0           | 0.697730409 | pseudogene       | 4  | 39715831  | 39716071          |
| ENSG00000249025 | 0           | 0.697730409 | pseudogene       | 4  | 387323    | 387447            |
| ENSG00000249026 | 1.16343121  | 0.390640832 | pseudogene       | 5  | 114725340 | 114728067         |
| ENSG00000249031 | 0           | 0.390640832 | pseudogene       | 5  | 173988779 | 173989066 SUMO2P6 |
| ENSG00000249034 | 1.960915222 | 1.16600992  | protein_coding   | 5  | 140240341 | 140243224         |
| ENSG00000249035 | 1.616589159 | 1.16600992  | lincRNA          | 5  | 151056506 | 151104343         |
| ENSG00000249042 | 5.752272083 | 5.988823159 | antisense        | 5  | 79778112  | 79783882          |
| ENSG00000249044 | 3.871730003 | 4.710890357 | processed_transc | 9  | 99660348  | 99711867          |
| ENSG00000249047 | 0.869158192 | 0.950786998 | pseudogene       | 4  | 2235978   | 2236223           |
| ENSG00000249052 | 0           | 0.950786998 | lincRNA          | 4  | 92809037  | 92825486          |
| ENSG00000249055 | 0           | 0.390640832 | pseudogene       | 4  | 99830688  | 99830999 TBCAP3   |
| ENSG00000249060 | 1.16343121  | 0.697730409 | pseudogene       | 4  | 73672984  | 73673907          |
| ENSG00000249064 | 0.499066092 | 0           | pseudogene       | 4  | 40021860  | 40023137 KRT18P25 |
| ENSG00000249068 | 0           | 1.16600992  | pseudogene       | 5  | 109175829 | 109176393         |
| ENSG00000249072 | 0.499066092 | 0.950786998 | pseudogene       | 4  | 78929666  | 78929842          |
| ENSG00000249079 | 0           | 0.390640832 | pseudogene       | 4  | 49214268  | 49214641          |
| ENSG00000249084 | 1.616589159 | 1.667587519 | antisense        | 4  | 178264158 | 178278186         |
| ENSG00000249085 | 0           | 0.390640832 | antisense        | 5  | 72090232  | 72112392          |
| ENSG00000249086 | 1.16343121  | 0.390640832 | processed_transc | 11 | 1885407   | 1887897           |
| ENSG00000249087 | 3.448790144 | 4.250702764 | protein_coding   | 1  | 23695490  | 23698332 C1orf213 |
| ENSG00000249089 | 0.869158192 | 0.390640832 | pseudogene       | 5  | 39022513  | 39022660          |
| ENSG00000249092 | 1.407729925 | 0           | pseudogene       | 5  | 42892421  | 42892919          |
| ENSG00000249094 | 0.499066092 | 0           | lincRNA          | 12 | 110318481 | 110326272         |
| ENSG00000249096 | 0.499066092 | 1.16600992  | lincRNA          | 4  | 185286341 | 185291024         |
| ENSG00000249098 | 0           | 0.390640832 | pseudogene       | 3  | 130637070 | 130637964         |
| ENSG00000249099 | 0.499066092 | 0           | lincRNA          | 5  | 26382628  | 26399928          |
| ENSG00000249102 | 0.869158192 | 0           | lincRNA          | 5  | 33009100  | 33025830          |
| ENSG00000249112 | 0           | 0.390640832 | protein_coding   | 5  | 124043520 | 124046430         |
| ENSG00000249119 | 10.48947188 | 9.647589989 | pseudogene       | 5  | 134259813 | 134260334 MTND6P4 |
| ENSG00000249121 | 1.16343121  | 0.697730409 | processed_transc | 13 | 33764078  | 33859873          |
| ENSG00000249129 | 1.16343121  | 0.697730409 | pseudogene       | 5  | 177398317 | 177399282         |
| ENSG00000249131 | 0.499066092 | 0.390640832 | lincRNA          | 5  | 139120934 | 139125808         |
| ENSG00000249137 | 1.16343121  | 1.353254395 | antisense        | 11 | 68857484  | 68858431          |
| ENSG00000249138 | 0.869158192 | 0           | pseudogene       | 4  | 185719450 | 185720200         |
| ENSG00000249140 | 0.869158192 | 0.950786998 | pseudogene       | 5  | 178999157 | 178999742         |
| ENSG00000249141 | 0.499066092 | 0.390640832 | protein_coding   | 6  | 167271582 | 167369612         |
| ENSG00000249142 | 0.499066092 | 0.390640832 | pseudogene       | 5  | 32522864  | 32523971          |
| ENSG00000249144 | 0.499066092 | 0.390640832 | antisense        | 17 | 48452420  | 48453244          |
| ENSG00000249148 | 0           | 0.390640832 | pseudogene       | 4  | 13633446  | 13634223          |
| ENSG00000249158 | 5.81716234  | 4.990346085 | protein_coding   | 5  | 140248689 | 140391929 PCDHA11 |
| ENSG00000249163 | 0.869158192 | 0           | antisense        | 14 | 45552248  | 45553180          |
| ENSG00000249167 | 0           | 0.390640832 | lincRNA          | 5  | 115910178 | 115927094         |
| ENSG00000249175 | 0           | 0.390640832 | antisense        | 5  | 94124494  | 94129304          |



|                 |             |             |                  |    |           |           |            |
|-----------------|-------------|-------------|------------------|----|-----------|-----------|------------|
| ENSG00000249177 | 0           | 0.390640832 | pseudogene       | 2  | 202419107 | 202420774 | MTND4P29   |
| ENSG00000249179 | 1.799000381 | 2.039052734 | processed_transc | 3  | 130569627 | 130575067 |            |
| ENSG00000249180 | 0           | 0.697730409 | antisense        | 5  | 96076783  | 96078402  |            |
| ENSG00000249183 | 0.499066092 | 0.390640832 | pseudogene       | 5  | 68364752  | 68365027  | SUMO2P4    |
| ENSG00000249188 | 0           | 0.950786998 | pseudogene       | 8  | 8011830   | 8074438   |            |
| ENSG00000249192 | 0.499066092 | 0.950786998 | pseudogene       | 5  | 134264083 | 134264217 |            |
| ENSG00000249193 | 1.16343121  | 0.950786998 | pseudogene       | 4  | 145766777 | 145768496 | HSPD1P5    |
| ENSG00000249196 | 0           | 0.390640832 | processed_transc | 12 | 129594174 | 129597839 |            |
| ENSG00000249199 | 0.499066092 | 0           | lincRNA          | 5  | 17369334  | 17375686  |            |
| ENSG00000249201 | 2.10647801  | 1.802319292 | antisense        | 5  | 1173256   | 1178720   |            |
| ENSG00000249206 | 0           | 0.697730409 | pseudogene       | 5  | 22580355  | 22580928  | GCNT1P2    |
| ENSG00000249207 | 0.499066092 | 1.518964905 | antisense        | 4  | 39114297  | 39128438  |            |
| ENSG00000249210 | 0           | 0.390640832 | pseudogene       | 19 | 47061898  | 47062899  |            |
| ENSG00000249212 | 0.499066092 | 0.390640832 | pseudogene       | 4  | 42031226  | 42032140  | ATP1B1P1   |
| ENSG00000249222 | 0.869158192 | 1.16600992  | protein_coding   | 22 | 43035809  | 43036607  | ATP5L2     |
| ENSG00000249234 | 0.499066092 | 0.950786998 | antisense        | 4  | 16180562  | 16184743  |            |
| ENSG00000249238 | 0           | 0.390640832 | pseudogene       | 5  | 66932210  | 66934770  |            |
| ENSG00000249241 | 0.499066092 | 0           | lincRNA          | 4  | 40318502  | 40332436  |            |
| ENSG00000249242 | 0.499066092 | 0.950786998 | protein_coding   | 4  | 83405743  | 83483510  | TMEM150C   |
| ENSG00000249244 | 1.799000381 | 1.353254395 | pseudogene       | 4  | 120312986 | 120316490 |            |
| ENSG00000249245 | 1.407729925 | 0.697730409 | pseudogene       | 4  | 146545313 | 146547187 |            |
| ENSG00000249249 | 2.762599152 | 2.420525079 | antisense        | 5  | 114937754 | 114956356 |            |
| ENSG00000249256 | 0           | 0.390640832 | pseudogene       | 4  | 24659734  | 24659998  | ATP5LP3    |
| ENSG00000249264 | 4.568725997 | 5.072639111 | pseudogene       | 4  | 106405855 | 106407237 | EEF1A1P9   |
| ENSG00000249266 | 0           | 0.697730409 | pseudogene       | 5  | 41967241  | 41968468  |            |
| ENSG00000249271 | 0           | 0.390640832 | pseudogene       | 15 | 66108640  | 66109819  |            |
| ENSG00000249274 | 0.499066092 | 1.16600992  | pseudogene       | 3  | 98501032  | 98502037  |            |
| ENSG00000249275 | 0.499066092 | 0           | lincRNA          | 4  | 158558839 | 158588196 |            |
| ENSG00000249279 | 2.762599152 | 2.039052734 | processed_transc | 5  | 60497136  | 60560756  |            |
| ENSG00000249281 | 3.146112541 | 3.845183986 | processed_transc | 17 | 16285881  | 16287220  |            |
| ENSG00000249286 | 1.407729925 | 1.16600992  | pseudogene       | 5  | 43587020  | 43588325  |            |
| ENSG00000249293 | 0           | 1.16600992  | antisense        | 5  | 73073864  | 73082316  |            |
| ENSG00000249295 | 1.616589159 | 0.697730409 | processed_transc | 5  | 68773299  | 68798293  |            |
| ENSG00000249302 | 0.869158192 | 0.697730409 | pseudogene       | 4  | 140467505 | 140467889 | FTH1P24    |
| ENSG00000249304 | 1.16343121  | 1.16600992  | antisense        | 4  | 114864412 | 114865476 |            |
| ENSG00000249306 | 5.538004898 | 6.35497494  | processed_transc | 5  | 173763298 | 173959460 |            |
| ENSG00000249307 | 2.57521082  | 1.16600992  | antisense        | 4  | 79892902  | 80229952  |            |
| ENSG00000249310 | 0           | 0.390640832 | antisense        | 22 | 39387564  | 39394214  |            |
| ENSG00000249313 | 2.762599152 | 1.925536307 | processed_transc | 20 | 57572451  | 57573051  |            |
| ENSG00000249316 | 0.499066092 | 0.390640832 | pseudogene       | 8  | 11138873  | 11140010  |            |
| ENSG00000249320 | 0.499066092 | 0           | pseudogene       | 4  | 25474139  | 25475437  |            |
| ENSG00000249328 | 0           | 0.950786998 | lincRNA          | 8  | 80681607  | 80783994  |            |
| ENSG00000249331 | 0           | 0.390640832 | processed_transc | 22 | 42610853  | 42739622  |            |
| ENSG00000249337 | 0.499066092 | 0           | pseudogene       | 4  | 49590806  | 49591540  | SNX18P25   |
| ENSG00000249346 | 0.499066092 | 0           | lincRNA          | 6  | 33835283  | 33864691  |            |
| ENSG00000249348 | 2.238690726 | 2.788380093 | antisense        | 4  | 39529639  | 39596327  | UGDH-AS1   |
| ENSG00000249349 | 0           | 0.390640832 | lincRNA          | 5  | 84408160  | 84408574  |            |
| ENSG00000249353 | 1.16343121  | 0.390640832 | pseudogene       | 5  | 93019034  | 93019373  |            |
| ENSG00000249356 | 0.499066092 | 0           | lincRNA          | 4  | 119990479 | 119991452 |            |
| ENSG00000249359 | 0           | 0.697730409 | lincRNA          | 5  | 21323945  | 21341484  |            |
| ENSG00000249363 | 0.869158192 | 1.16600992  | pseudogene       | 5  | 145107923 | 145108912 |            |
| ENSG00000249375 | 3.335220907 | 3.027231696 | processed_transc | 8  | 128698588 | 128746213 |            |
| ENSG00000249378 | 4.19837882  | 4.274079748 | processed_transc | 4  | 189321890 | 189602205 |            |
| ENSG00000249379 | 0.499066092 | 0.390640832 | antisense        | 6  | 53367983  | 53371717  |            |
| ENSG00000249383 | 0           | 0.390640832 | lincRNA          | 17 | 49389970  | 49412526  |            |
| ENSG00000249388 | 1.16343121  | 0.697730409 | lincRNA          | 12 | 54475902  | 54496477  |            |
| ENSG00000249396 | 0.499066092 | 0           | lincRNA          | 5  | 10493639  | 10502840  |            |
| ENSG00000249405 | 0.499066092 | 0           | lincRNA          | 5  | 50154594  | 50155854  |            |
| ENSG00000249406 | 1.407729925 | 1.518964905 | lincRNA          | 17 | 48286333  | 48291820  |            |
| ENSG00000249407 | 1.16343121  | 0.390640832 | antisense        | 3  | 136677967 | 136701038 | IL20RB-AS1 |
| ENSG00000249412 | 0           | 0.390640832 | antisense        | 5  | 179390615 | 179391419 |            |
| ENSG00000249417 | 1.407729925 | 0.390640832 | processed_transc | 3  | 140986195 | 141085979 |            |
| ENSG00000249425 | 0.869158192 | 0.390640832 | lincRNA          | 4  | 161460406 | 161507969 |            |

|                 |             |             |                  |    |           |                      |
|-----------------|-------------|-------------|------------------|----|-----------|----------------------|
| ENSG00000249428 | 0           | 1.353254395 | protein_coding   | 4  | 2451700   | 2464668              |
| ENSG00000249429 | 0           | 0.390640832 | lincRNA          | 5  | 142869420 | 142910915            |
| ENSG00000249437 | 4.734682531 | 4.961837817 | protein_coding   | 5  | 70264310  | 70320941 NAIP        |
| ENSG00000249451 | 0           | 0.697730409 | antisense        | 17 | 48580773  | 48585689             |
| ENSG00000249456 | 0           | 2.242360793 | processed_transc | 10 | 126605712 | 126631450            |
| ENSG00000249459 | 5.090170488 | 5.072639111 | pseudogene       | 17 | 18561742  | 18585572             |
| ENSG00000249464 | 0.499066092 | 0           | processed_transc | 4  | 124571422 | 124851561            |
| ENSG00000249465 | 0           | 0.697730409 | pseudogene       | 4  | 110267482 | 110268615 RBMXP4     |
| ENSG00000249471 | 6.592037289 | 6.874119142 | protein_coding   | 19 | 58962971  | 58969199 ZNF324B     |
| ENSG00000249476 | 3.274897671 | 2.971122874 | lincRNA          | 5  | 108572821 | 108662070            |
| ENSG00000249483 | 0           | 0.390640832 | lincRNA          | 5  | 81147420  | 81148020             |
| ENSG00000249485 | 1.16343121  | 0.697730409 | pseudogene       | 5  | 14797234  | 14798509 RBBP4P1     |
| ENSG00000249487 | 0           | 0.697730409 | lincRNA          | 15 | 89128802  | 89148341             |
| ENSG00000249489 | 1.960915222 | 1.353254395 | pseudogene       | 11 | 88141347  | 88142391 GAPDHP70    |
| ENSG00000249492 | 3.448790144 | 3.081239798 | processed_transc | 5  | 43484061  | 43509458             |
| ENSG00000249493 | 1.16343121  | 1.925536307 | pseudogene       | 21 | 15436646  | 15441408 ANKRD20A18P |
| ENSG00000249494 | 0           | 0.390640832 | antisense        | 5  | 118342042 | 118406585            |
| ENSG00000249500 | 1.799000381 | 1.667587519 | lincRNA          | 4  | 166605791 | 166683930            |
| ENSG00000249502 | 1.407729925 | 0.950786998 | antisense        | 4  | 17589090  | 17616194             |
| ENSG00000249505 | 0.499066092 | 0           | pseudogene       | 3  | 128764606 | 128765764            |
| ENSG00000249509 | 0.499066092 | 0           | antisense        | 4  | 113436541 | 113468037            |
| ENSG00000249526 | 0.869158192 | 0.950786998 | lincRNA          | 5  | 139064230 | 139124595            |
| ENSG00000249548 | 3.146112541 | 2.144285137 | antisense        | 4  | 1246779   | 1259951              |
| ENSG00000249550 | 2.57521082  | 1.518964905 | lincRNA          | 12 | 114117264 | 114211488            |
| ENSG00000249558 | 0           | 1.353254395 | pseudogene       | 3  | 126485277 | 126486318 RCC2P4     |
| ENSG00000249565 | 1.960915222 | 2.144285137 | pseudogene       | 4  | 79102193  | 79103200             |
| ENSG00000249572 | 2.928422289 | 2.242360793 | antisense        | 5  | 33424131  | 33440725             |
| ENSG00000249574 | 0.869158192 | 1.16600992  | processed_transc | 7  | 419325    | 422678               |
| ENSG00000249584 | 0.499066092 | 0           | lincRNA          | 5  | 57186154  | 57194989             |
| ENSG00000249592 | 4.19837882  | 4.363974406 | processed_transc | 4  | 756175    | 775637               |
| ENSG00000249593 | 0.499066092 | 0.950786998 | antisense        | 5  | 138348336 | 138386892            |
| ENSG00000249595 | 0           | 0.390640832 | sense_intronic   | 7  | 74856621  | 74857439             |
| ENSG00000249602 | 0.869158192 | 0.390640832 | processed_transc | 1  | 151735860 | 151741977            |
| ENSG00000249609 | 1.407729925 | 2.039052734 | antisense        | 4  | 169750070 | 169754088            |
| ENSG00000249623 | 1.16343121  | 1.16600992  | antisense        | 4  | 169569047 | 169569738            |
| ENSG00000249624 | 0.499066092 | 1.353254395 | protein_coding   | 21 | 34619079  | 34656082             |
| ENSG00000249626 | 2.238690726 | 3.32456471  | pseudogene       | 3  | 197361186 | 197362682            |
| ENSG00000249628 | 3.211941663 | 2.579085888 | lincRNA          | 12 | 1609691   | 1616484              |
| ENSG00000249631 | 0.869158192 | 0           | lincRNA          | 4  | 11627338  | 11815582             |
| ENSG00000249633 | 0.499066092 | 0.697730409 | pseudogene       | 11 | 5548507   | 5549404 OR52V1P      |
| ENSG00000249635 | 0.869158192 | 0.950786998 | antisense        | 4  | 106924474 | 106943635            |
| ENSG00000249637 | 2.238690726 | 2.420525079 | antisense        | 5  | 139750476 | 139780952            |
| ENSG00000249639 | 1.16343121  | 0           | antisense        | 5  | 134786303 | 134794387            |
| ENSG00000249641 | 0.869158192 | 0.950786998 | antisense        | 12 | 54329112  | 54333427             |
| ENSG00000249643 | 0           | 0.390640832 | antisense        | 5  | 124073092 | 124073698            |
| ENSG00000249647 | 0.499066092 | 0           | protein_coding   | 5  | 134571924 | 134583869            |
| ENSG00000249650 | 0.869158192 | 0.390640832 | antisense        | 5  | 602735    | 612325               |
| ENSG00000249655 | 0.499066092 | 1.16600992  | antisense        | 5  | 79926132  | 79927409             |
| ENSG00000249661 | 1.407729925 | 2.039052734 | pseudogene       | 4  | 141562994 | 141566643            |
| ENSG00000249664 | 0.869158192 | 0.390640832 | lincRNA          | 5  | 82308104  | 82308928             |
| ENSG00000249673 | 6.984620223 | 7.275499917 | processed_transc | 4  | 2936626   | 2963465 C4orf10      |
| ENSG00000249679 | 1.960915222 | 1.802319292 | protein_coding   | 4  | 186392670 | 186393417            |
| ENSG00000249680 | 0           | 0.390640832 | pseudogene       | 22 | 21419749  | 21424386             |
| ENSG00000249682 | 0           | 0.390640832 | pseudogene       | 4  | 78137566  | 78138028 FTLP9       |
| ENSG00000249684 | 1.616589159 | 1.802319292 | antisense        | 5  | 177377336 | 177390961            |
| ENSG00000249685 | 2.35979773  | 3.133298822 | lincRNA          | 4  | 39135533  | 39137228             |
| ENSG00000249690 | 0           | 0.950786998 | processed_transc | 4  | 151500241 | 151502697            |
| ENSG00000249693 | 0           | 0.390640832 | protein_coding   | 4  | 57396775  | 57469673             |
| ENSG00000249695 | 0.869158192 | 0           | antisense        | 12 | 246577    | 258335               |
| ENSG00000249700 | 0.869158192 | 0.697730409 | antisense        | 4  | 56230138  | 56251747             |
| ENSG00000249706 | 0.499066092 | 0           | sense_intronic   | 4  | 54766038  | 54783002             |
| ENSG00000249709 | 6.931877181 | 7.628245414 | protein_coding   | 19 | 12636185  | 12662327 ZNF564      |
| ENSG00000249715 | 2.57521082  | 2.144285137 | processed_transc | 2  | 97308474  | 97370624 FER1L5      |

|                 |             |             |                  |    |           |           |          |
|-----------------|-------------|-------------|------------------|----|-----------|-----------|----------|
| ENSG00000249719 | 0.869158192 | 0.697730409 | processed_transc | 6  | 88360648  | 88362932  |          |
| ENSG00000249722 | 0.499066092 | 0           | lincRNA          | 5  | 173756615 | 173757506 |          |
| ENSG00000249734 | 1.16343121  | 0.950786998 | lincRNA          | 5  | 6795993   | 6826841   |          |
| ENSG00000249738 | 0.499066092 | 0           | lincRNA          | 5  | 158737941 | 158789842 |          |
| ENSG00000249740 | 4.131913373 | 3.368666104 | lincRNA          | 5  | 38736157  | 38845931  |          |
| ENSG00000249743 | 0.499066092 | 0.390640832 | lincRNA          | 5  | 72509774  | 72590761  |          |
| ENSG00000249751 | 0           | 0.390640832 | protein_coding   | 5  | 138784245 | 138842328 | ECSCR    |
| ENSG00000249752 | 0           | 0.697730409 | lincRNA          | 4  | 149948597 | 149983674 |          |
| ENSG00000249753 | 0.869158192 | 0.390640832 | processed_transc | 12 | 64017568  | 64189498  |          |
| ENSG00000249755 | 0           | 0.950786998 | pseudogene       | 4  | 89448308  | 89449321  |          |
| ENSG00000249762 | 1.799000381 | 0.390640832 | processed_transc | 4  | 8242571   | 8243530   |          |
| ENSG00000249767 | 0.499066092 | 1.353254395 | pseudogene       | 4  | 9080749   | 9143334   |          |
| ENSG00000249768 | 0.499066092 | 0           | pseudogene       | 5  | 126073475 | 126073687 |          |
| ENSG00000249773 | 0.499066092 | 0.390640832 | protein_coding   | 7  | 55954970  | 56022932  |          |
| ENSG00000249774 | 0.499066092 | 0.390640832 | pseudogene       | 5  | 31923473  | 31923638  |          |
| ENSG00000249779 | 0.869158192 | 1.353254395 | pseudogene       | 5  | 43206811  | 43207913  |          |
| ENSG00000249780 | 2.57521082  | 0.390640832 | pseudogene       | 4  | 12641922  | 12642261  |          |
| ENSG00000249781 | 1.407729925 | 0.950786998 | processed_transc | 5  | 9629558   | 9903938   |          |
| ENSG00000249790 | 4.026095388 | 2.242360793 | processed_transc | 12 | 8940853   | 8948385   |          |
| ENSG00000249791 | 0           | 0.697730409 | antisense        | 5  | 114524260 | 114524629 |          |
| ENSG00000249798 | 0.869158192 | 0.390640832 | pseudogene       | 1  | 120081132 | 120088536 | HSD3BP3  |
| ENSG00000249807 | 1.16343121  | 0.390640832 | lincRNA          | 5  | 10137250  | 10138477  |          |
| ENSG00000249816 | 0           | 0.390640832 | processed_transc | 8  | 125860979 | 125966570 |          |
| ENSG00000249823 | 0           | 0.390640832 | processed_transc | 4  | 106616681 | 106629250 |          |
| ENSG00000249825 | 0.869158192 | 1.16600992  | antisense        | 5  | 79348197  | 79379477  |          |
| ENSG00000249835 | 0.869158192 | 0.950786998 | antisense        | 5  | 82827171  | 82877139  | VCAN-AS1 |
| ENSG00000249840 | 0.499066092 | 0.390640832 | pseudogene       | 19 | 11696061  | 11697950  |          |
| ENSG00000249846 | 1.16343121  | 1.518964905 | processed_transc | 3  | 129831393 | 129838359 |          |
| ENSG00000249850 | 1.16343121  | 2.242360793 | pseudogene       | 5  | 36885308  | 36886599  |          |
| ENSG00000249852 | 2.10647801  | 2.420525079 | protein_coding   | 7  | 227554    | 229557    |          |
| ENSG00000249853 | 1.616589159 | 1.802319292 | protein_coding   | 6  | 114376750 | 114664209 | HS3ST5   |
| ENSG00000249855 | 4.261916566 | 5.072639111 | pseudogene       | 5  | 43495175  | 43496556  |          |
| ENSG00000249858 | 0.499066092 | 0           | pseudogene       | 4  | 77266240  | 77266739  | SNX5P1   |
| ENSG00000249859 | 12.14987068 | 11.66791197 | processed_transc | 8  | 128806779 | 129113499 | PVT1     |
| ENSG00000249863 | 3.744048221 | 3.453019579 | pseudogene       | 4  | 37869804  | 37871589  |          |
| ENSG00000249867 | 1.16343121  | 0.697730409 | lincRNA          | 11 | 28724162  | 29085368  |          |
| ENSG00000249894 | 1.616589159 | 0.697730409 | lincRNA          | 5  | 67096568  | 67185924  |          |
| ENSG00000249896 | 1.407729925 | 2.579085888 | lincRNA          | 4  | 6202460   | 6240044   |          |
| ENSG00000249898 | 3.448790144 | 3.608232228 | antisense        | 8  | 6475996   | 6565730   |          |
| ENSG00000249899 | 0           | 0.697730409 | antisense        | 5  | 52228249  | 52286108  |          |
| ENSG00000249906 | 0.869158192 | 0.390640832 | antisense        | 17 | 47583019  | 47651426  |          |
| ENSG00000249908 | 0           | 0.390640832 | pseudogene       | 5  | 767512    | 769046    |          |
| ENSG00000249911 | 0           | 0.697730409 | lincRNA          | 5  | 38710469  | 38720375  |          |
| ENSG00000249913 | 0           | 0.390640832 | antisense        | 1  | 112957339 | 112958909 |          |
| ENSG00000249915 | 10.09780491 | 10.23344426 | protein_coding   | 5  | 271736    | 353971    | PDCD6    |
| ENSG00000249920 | 0.499066092 | 0.390640832 | pseudogene       | 4  | 74804321  | 74805278  |          |
| ENSG00000249921 | 1.16343121  | 0.390640832 | pseudogene       | 5  | 108119799 | 108121240 |          |
| ENSG00000249923 | 0.499066092 | 0           | antisense        | 22 | 20186252  | 20192441  |          |
| ENSG00000249931 | 0           | 0.390640832 | protein_coding   | 15 | 32684983  | 32695396  |          |
| ENSG00000249934 | 0           | 0.697730409 | pseudogene       | 4  | 89429748  | 89431354  |          |
| ENSG00000249936 | 3.146112541 | 2.652276565 | pseudogene       | 4  | 46725793  | 46726625  | RAC1P2   |
| ENSG00000249942 | 0.869158192 | 0           | antisense        | 4  | 75418301  | 75514664  |          |
| ENSG00000249947 | 2.10647801  | 0.950786998 | pseudogene       | 5  | 112220791 | 112221442 | XBP1P1   |
| ENSG00000249952 | 2.671945279 | 3.570966319 | pseudogene       | 4  | 49517190  | 49518352  |          |
| ENSG00000249955 | 0           | 0.390640832 | antisense        | 4  | 170902898 | 170914957 |          |
| ENSG00000249961 | 0.499066092 | 0.390640832 | pseudogene       | 16 | 66788879  | 66835523  | CCDC79   |
| ENSG00000249963 | 0           | 0.950786998 | pseudogene       | 5  | 99332251  | 99333636  |          |
| ENSG00000249965 | 0           | 0.390640832 | pseudogene       | 4  | 110476326 | 110476887 |          |
| ENSG00000249977 | 0           | 0.697730409 | pseudogene       | 5  | 96785062  | 96785445  |          |
| ENSG00000249986 | 0           | 0.390640832 | pseudogene       | 3  | 141319118 | 141319421 | YWHAQP6  |
| ENSG00000249992 | 8.971306859 | 8.609741755 | protein_coding   | 3  | 45265958  | 45267770  | TMEM158  |
| ENSG00000249996 | 0           | 0.950786998 | antisense        | 5  | 122371966 | 122390362 |          |
| ENSG00000250011 | 0           | 0.697730409 | pseudogene       | 2  | 231379738 | 231380353 | HMGB1P3  |

|                 |             |             |                  |    |           |                         |
|-----------------|-------------|-------------|------------------|----|-----------|-------------------------|
| ENSG00000250012 | 0.869158192 | 1.353254395 | antisense        | 3  | 125803063 | 125814192               |
| ENSG00000250021 | 2.671945279 | 2.242360793 | protein_coding   | 15 | 90377540  | 90456114 C15orf38-AP3S2 |
| ENSG00000250027 | 0.499066092 | 0.950786998 | antisense        | 4  | 164029937 | 164041117               |
| ENSG00000250031 | 2.10647801  | 1.16600992  | pseudogene       | 8  | 59337147  | 59339244                |
| ENSG00000250033 | 0.869158192 | 2.652276565 | processed_transc | 4  | 138978618 | 139099331               |
| ENSG00000250039 | 1.407729925 | 0.950786998 | antisense        | 4  | 21950638  | 22331953                |
| ENSG00000250041 | 3.554067925 | 0.697730409 | processed_transc | 11 | 10906432  | 10920869                |
| ENSG00000250045 | 0.499066092 | 0.697730409 | pseudogene       | 5  | 112113357 | 112113858 CBX3P3        |
| ENSG00000250057 | 0.499066092 | 0.950786998 | lincRNA          | 4  | 84154665  | 84168366                |
| ENSG00000250061 | 0.499066092 | 0.950786998 | antisense        | 5  | 162439271 | 162864332               |
| ENSG00000250067 | 7.703736051 | 7.88892877  | protein_coding   | 19 | 19627036  | 19648393 YJEFN3         |
| ENSG00000250068 | 1.16343121  | 0.950786998 | pseudogene       | 9  | 115344059 | 115344870               |
| ENSG00000250069 | 1.799000381 | 0.697730409 | sense_intronic   | 5  | 139579748 | 139582772               |
| ENSG00000250072 | 0.869158192 | 0           | lincRNA          | 5  | 148442880 | 148489350               |
| ENSG00000250073 | 1.407729925 | 2.039052734 | processed_transc | 11 | 124629025 | 124635832               |
| ENSG00000250075 | 0           | 0.697730409 | lincRNA          | 4  | 68283023  | 68333969                |
| ENSG00000250076 | 0.499066092 | 0           | pseudogene       | 4  | 33012570  | 33013368                |
| ENSG00000250081 | 1.799000381 | 2.039052734 | lincRNA          | 5  | 64782271  | 64782875                |
| ENSG00000250091 | 2.928422289 | 4.048652948 | protein_coding   | 12 | 124410971 | 124419531 DNAH10OS      |
| ENSG00000250094 | 0.869158192 | 0.950786998 | processed_transc | 1  | 95448745  | 95492759                |
| ENSG00000250098 | 0           | 0.390640832 | lincRNA          | 4  | 12949198  | 12950294                |
| ENSG00000250101 | 0.499066092 | 0.950786998 | antisense        | 5  | 177366623 | 177410055               |
| ENSG00000250105 | 0.869158192 | 0.697730409 | lincRNA          | 11 | 66326337  | 66327855                |
| ENSG00000250106 | 0.499066092 | 0.697730409 | antisense        | 5  | 10627372  | 10628337 ANKRD33B-AS1   |
| ENSG00000250107 | 0.499066092 | 0.390640832 | processed_transc | 17 | 48633568  | 48639469                |
| ENSG00000250114 | 0           | 0.390640832 | pseudogene       | 5  | 162843531 | 162843737               |
| ENSG00000250116 | 2.471521042 | 2.501982735 | antisense        | 2  | 46795395  | 46807377                |
| ENSG00000250120 | 4.942865586 | 4.448594745 | protein_coding   | 5  | 140235595 | 140391929 PCDHA10       |
| ENSG00000250130 | 1.16343121  | 0.390640832 | pseudogene       | 15 | 44646889  | 44647890                |
| ENSG00000250131 | 1.799000381 | 2.039052734 | antisense        | 4  | 178366133 | 178598280               |
| ENSG00000250132 | 4.292665995 | 4.585695337 | processed_transc | 12 | 1084464   | 1099207                 |
| ENSG00000250133 | 2.10647801  | 2.579085888 | antisense        | 12 | 54388992  | 54390569                |
| ENSG00000250138 | 0.499066092 | 0           | pseudogene       | 5  | 68927790  | 68932312                |
| ENSG00000250140 | 0           | 0.390640832 | pseudogene       | 5  | 34860888  | 34861611                |
| ENSG00000250144 | 1.16343121  | 2.912743273 | pseudogene       | 4  | 135966619 | 135968005               |
| ENSG00000250148 | 0           | 0.950786998 | pseudogene       | 5  | 60039390  | 60040797 KRT8P31        |
| ENSG00000250155 | 0           | 0.390640832 | antisense        | 5  | 36666316  | 36725297                |
| ENSG00000250158 | 0           | 0.390640832 | lincRNA          | 5  | 95583480  | 95614455                |
| ENSG00000250159 | 1.799000381 | 1.802319292 | antisense        | 5  | 137150022 | 137225025               |
| ENSG00000250163 | 0.499066092 | 0.697730409 | processed_transc | 4  | 88140676  | 88161466                |
| ENSG00000250170 | 0           | 0.390640832 | sense_intronic   | 3  | 141243975 | 141244963 RASA2-IT1     |
| ENSG00000250174 | 0           | 0.950786998 | antisense        | 3  | 123408491 | 123411254 MYLK-AS2      |
| ENSG00000250182 | 4.409500985 | 4.17820932  | pseudogene       | 5  | 14652050  | 14653438                |
| ENSG00000250188 | 2.928422289 | 3.87606762  | processed_transc | 1  | 1337454   | 1339205                 |
| ENSG00000250192 | 0.499066092 | 1.518964905 | lincRNA          | 4  | 58020743  | 58022618                |
| ENSG00000250195 | 0.869158192 | 0           | antisense        | 4  | 139741108 | 139933800               |
| ENSG00000250197 | 0.499066092 | 0           | pseudogene       | 5  | 114624733 | 114625027 HMG1P15       |
| ENSG00000250220 | 2.238690726 | 2.579085888 | antisense        | 4  | 74124926  | 74183670                |
| ENSG00000250221 | 0.499066092 | 0.390640832 | pseudogene       | 5  | 97727774  | 97729234 KRT8P32        |
| ENSG00000250222 | 1.407729925 | 2.334191469 | antisense        | 5  | 180618924 | 180621429               |
| ENSG00000250227 | 1.407729925 | 0.950786998 | pseudogene       | 4  | 165836717 | 165838135 TRIM60P14     |
| ENSG00000250230 | 0.499066092 | 0           | lincRNA          | 11 | 61355966  | 61375022                |
| ENSG00000250234 | 0           | 0.697730409 | antisense        | 5  | 34656517  | 34657355                |
| ENSG00000250235 | 1.16343121  | 1.16600992  | antisense        | 4  | 157852970 | 157854283               |
| ENSG00000250240 | 1.799000381 | 1.16600992  | antisense        | 5  | 95036953  | 95067999                |
| ENSG00000250251 | 6.138202758 | 6.554308016 | pseudogene       | 16 | 15219099  | 15248421 PKD1P6         |
| ENSG00000250259 | 0           | 0.390640832 | lincRNA          | 4  | 1021466   | 1022760                 |
| ENSG00000250260 | 0           | 0.390640832 | lincRNA          | 5  | 137374888 | 137375668               |
| ENSG00000250267 | 0.499066092 | 1.16600992  | antisense        | 8  | 110310827 | 110328742               |
| ENSG00000250271 | 1.16343121  | 0.697730409 | lincRNA          | 3  | 151515272 | 151526037               |
| ENSG00000250274 | 0           | 0.697730409 | lincRNA          | 5  | 169735705 | 169739720               |
| ENSG00000250280 | 1.16343121  | 1.667587519 | sense_intronic   | 12 | 65675437  | 65680508                |
| ENSG00000250286 | 0           | 1.518964905 | processed_transc | 17 | 48614655  | 48616115                |

|                 |             |             |                  |    |           |                     |
|-----------------|-------------|-------------|------------------|----|-----------|---------------------|
| ENSG00000250295 | 1.616589159 | 1.353254395 | antisense        | 8  | 74209946  | 74268696            |
| ENSG00000250303 | 4.437288965 | 5.072639111 | processed_transc | 11 | 112141472 | 112233257           |
| ENSG00000250310 | 0           | 0.390640832 | antisense        | 17 | 47622209  | 47655324            |
| ENSG00000250312 | 5.223818625 | 5.57429348  | lincRNA          | 4  | 124386    | 157779 ZNF718       |
| ENSG00000250317 | 7.119373418 | 7.475288518 | protein_coding   | 4  | 25863452  | 25931435 C4orf52    |
| ENSG00000250318 | 4.437288965 | 4.640685763 | pseudogene       | 22 | 31049864  | 31050801            |
| ENSG00000250320 | 3.744048221 | 1.353254395 | antisense        | 5  | 83680245  | 83786583            |
| ENSG00000250321 | 0           | 0.390640832 | pseudogene       | 4  | 336610    | 336751              |
| ENSG00000250322 | 0           | 0.697730409 | pseudogene       | 4  | 124181085 | 124181273           |
| ENSG00000250326 | 0.499066092 | 1.16600992  | antisense        | 4  | 143854348 | 144106014           |
| ENSG00000250328 | 0.499066092 | 0           | antisense        | 5  | 121772192 | 121814782           |
| ENSG00000250329 | 1.16343121  | 0           | pseudogene       | 5  | 127445178 | 127446686 KDELC1P1  |
| ENSG00000250330 | 0           | 0.390640832 | pseudogene       | 5  | 78525727  | 78526411            |
| ENSG00000250331 | 0           | 0.390640832 | lincRNA          | 5  | 96840400  | 97006750            |
| ENSG00000250332 | 0           | 0.390640832 | pseudogene       | 5  | 23303674  | 23305252            |
| ENSG00000250337 | 7.334137164 | 7.402908012 | lincRNA          | 5  | 27472399  | 27496508            |
| ENSG00000250343 | 0.499066092 | 0           | antisense        | 5  | 146559767 | 146614422           |
| ENSG00000250346 | 0.499066092 | 0.390640832 | pseudogene       | 5  | 147301742 | 147302984           |
| ENSG00000250354 | 0           | 0.390640832 | antisense        | 4  | 149067622 | 149130031           |
| ENSG00000250362 | 0           | 0.697730409 | processed_transc | 5  | 95197490  | 95210223            |
| ENSG00000250363 | 0.869158192 | 0           | pseudogene       | 4  | 116841863 | 116843134 KRT18P21  |
| ENSG00000250365 | 2.762599152 | 3.532712221 | antisense        | 14 | 31889492  | 31922089            |
| ENSG00000250366 | 0.499066092 | 1.16600992  | lincRNA          | 14 | 96342729  | 96391908            |
| ENSG00000250381 | 0.499066092 | 1.518964905 | pseudogene       | 4  | 4145185   | 4152148             |
| ENSG00000250397 | 5.795854912 | 5.393992    | antisense        | 11 | 856880    | 859795              |
| ENSG00000250400 | 0           | 0.390640832 | lincRNA          | 8  | 130228728 | 130253496           |
| ENSG00000250404 | 0.499066092 | 0           | processed_transc | 11 | 3837982   | 3843130             |
| ENSG00000250410 | 1.799000381 | 1.667587519 | antisense        | 4  | 186291879 | 186312082           |
| ENSG00000250412 | 0           | 0.697730409 | pseudogene       | 4  | 120255484 | 120299388           |
| ENSG00000250420 | 7.599989788 | 7.460081189 | pseudogene       | 5  | 178191862 | 178245436 AACSP1    |
| ENSG00000250423 | 0.499066092 | 0           | protein_coding X |    | 118212598 | 118284542 KIAA1210  |
| ENSG00000250432 | 0           | 0.950786998 | processed_transc | 12 | 54478916  | 54519776            |
| ENSG00000250439 | 0.869158192 | 0           | pseudogene       | 3  | 13974553  | 13978989            |
| ENSG00000250443 | 0           | 1.16600992  | pseudogene       | 3  | 197232135 | 197233857           |
| ENSG00000250444 | 2.35979773  | 1.925536307 | pseudogene       | 5  | 114847774 | 114849391 CCT5P1    |
| ENSG00000250451 | 2.35979773  | 2.144285137 | antisense        | 12 | 54392806  | 54393794            |
| ENSG00000250461 | 0           | 1.667587519 | pseudogene       | 5  | 60670939  | 60671682            |
| ENSG00000250469 | 1.799000381 | 1.16600992  | processed_transc | 10 | 47011753  | 47174018            |
| ENSG00000250471 | 1.16343121  | 1.925536307 | pseudogene       | 4  | 8176148   | 8176721 GMPPSP1     |
| ENSG00000250473 | 0           | 0.697730409 | pseudogene       | 4  | 52731216  | 52731701 DUTP7      |
| ENSG00000250474 | 2.471521042 | 1.16600992  | pseudogene       | 7  | 107268998 | 107269943           |
| ENSG00000250476 | 0.869158192 | 0.697730409 | pseudogene       | 4  | 3968761   | 3969387             |
| ENSG00000250479 | 8.744039402 | 7.955508102 | protein_coding   | 22 | 24108021  | 24110630 CHCHD10    |
| ENSG00000250483 | 0           | 0.390640832 | pseudogene       | 8  | 15663658  | 15664792 PPM1A1P1   |
| ENSG00000250486 | 2.928422289 | 4.048652948 | protein_coding   | 4  | 165878100 | 165880274 C4orf39   |
| ENSG00000250490 | 0.499066092 | 1.518964905 | lincRNA          | 5  | 6310554   | 6339997             |
| ENSG00000250492 | 0.869158192 | 0           | pseudogene       | 5  | 39719086  | 39721615            |
| ENSG00000250496 | 0           | 0.390640832 | pseudogene       | 4  | 99943462  | 99944279 ABT1P1     |
| ENSG00000250508 | 2.471521042 | 2.420525079 | lincRNA          | 11 | 68638132  | 68642010            |
| ENSG00000250509 | 3.335220907 | 4.048652948 | lincRNA          | 5  | 179868559 | 179870238           |
| ENSG00000250510 | 3.004694206 | 3.411459265 | protein_coding   | 12 | 6930711   | 6936586 GPR162      |
| ENSG00000250513 | 0.869158192 | 0.697730409 | antisense        | 5  | 134369072 | 134551255           |
| ENSG00000250519 | 1.16343121  | 3.081239798 | lincRNA          | 11 | 93971316  | 94012372            |
| ENSG00000250526 | 1.407729925 | 1.802319292 | pseudogene       | 5  | 14639535  | 14641127 CCT6P2     |
| ENSG00000250530 | 0           | 0.390640832 | antisense        | 5  | 124065403 | 124065848           |
| ENSG00000250535 | 0.869158192 | 0.390640832 | pseudogene       | 6  | 31981047  | 31981564 STK19P     |
| ENSG00000250536 | 0.499066092 | 1.16600992  | pseudogene       | 1  | 214778813 | 214782183 FAM108A4P |
| ENSG00000250539 | 2.928422289 | 2.788380093 | pseudogene       | 5  | 122736616 | 122738038 KRT8P33   |
| ENSG00000250541 | 0           | 0.390640832 | antisense        | 4  | 25771888  | 25775199            |
| ENSG00000250546 | 0.869158192 | 0           | processed_transc | 4  | 84717589  | 85214565            |
| ENSG00000250547 | 0           | 0.390640832 | pseudogene       | 4  | 164186727 | 164187735           |
| ENSG00000250548 | 3.393122761 | 2.420525079 | lincRNA          | 14 | 62023031  | 62037371            |
| ENSG00000250551 | 0           | 0.390640832 | lincRNA          | 5  | 95385819  | 95551223            |

|                 |             |             |                  |    |           |                       |
|-----------------|-------------|-------------|------------------|----|-----------|-----------------------|
| ENSG00000250559 | 0.869158192 | 0.697730409 | processed_transc | 9  | 37432084  | 37433871              |
| ENSG00000250561 | 0.499066092 | 0           | pseudogene       | 7  | 6919258   | 6920209               |
| ENSG00000250565 | 6.710639711 | 6.440109466 | protein_coding   | 2  | 46717889  | 46769696 ATP6V1E2     |
| ENSG00000250568 | 1.799000381 | 1.667587519 | pseudogene       | 4  | 39974748  | 39975062              |
| ENSG00000250569 | 1.16343121  | 2.039052734 | pseudogene       | 8  | 87493983  | 87495231              |
| ENSG00000250571 | 6.716321419 | 6.866449614 | protein_coding   | 8  | 144349603 | 144359101 GLI4        |
| ENSG00000250575 | 0           | 0.697730409 | pseudogene       | 1  | 326096    | 328112                |
| ENSG00000250580 | 0           | 0.697730409 | pseudogene       | 3  | 129918551 | 129918761             |
| ENSG00000250584 | 5.909333162 | 5.931169853 | protein_coding   | 5  | 1363697   | 1380182               |
| ENSG00000250588 | 5.909333162 | 6.009862691 | protein_coding   | 3  | 158680024 | 159615155 IQCJ-SCHIP1 |
| ENSG00000250591 | 0.499066092 | 0           | pseudogene       | 7  | 142468264 | 142471794             |
| ENSG00000250592 | 0           | 0.390640832 | processed_transc | 3  | 130618258 | 130648820             |
| ENSG00000250596 | 0           | 0.390640832 | processed_transc | 4  | 175444852 | 175461495             |
| ENSG00000250600 | 0           | 0.390640832 | antisense        | 5  | 10441402  | 10441904 ROPN1L-AS1   |
| ENSG00000250602 | 2.10647801  | 1.16600992  | antisense        | 5  | 125769197 | 125826063             |
| ENSG00000250608 | 2.57521082  | 2.039052734 | processed_transc | 3  | 131043936 | 131100319             |
| ENSG00000250610 | 0           | 1.16600992  | processed_transc | 4  | 57896939  | 57931769              |
| ENSG00000250614 | 0.499066092 | 0           | antisense        | 7  | 76103904  | 76108173 DTX2         |
| ENSG00000250616 | 3.211941663 | 3.781359661 | antisense        | 16 | 30107751  | 30115437              |
| ENSG00000250629 | 1.16343121  | 0.390640832 | antisense        | 5  | 38783682  | 38792856              |
| ENSG00000250635 | 0.869158192 | 1.802319292 | lincRNA          | 5  | 139028584 | 139029313             |
| ENSG00000250638 | 0.499066092 | 0.390640832 | processed_transc | 19 | 18313148  | 18314845              |
| ENSG00000250645 | 0.499066092 | 1.353254395 | pseudogene       | 5  | 418818    | 419224                |
| ENSG00000250651 | 0.499066092 | 0           | pseudogene       | 4  | 103817882 | 103819394 PABPC1P7    |
| ENSG00000250654 | 0.869158192 | 1.353254395 | pseudogene       | 12 | 54470622  | 54475687              |
| ENSG00000250656 | 0.869158192 | 1.667587519 | pseudogene       | 4  | 68582580  | 68583107              |
| ENSG00000250657 | 2.10647801  | 0.390640832 | processed_transc | 4  | 43342892  | 43347617              |
| ENSG00000250659 | 1.616589159 | 1.353254395 | antisense        | 11 | 62304784  | 62309490              |
| ENSG00000250661 | 0           | 0.390640832 | processed_transc | 1  | 150131600 | 150136916             |
| ENSG00000250666 | 0           | 0.390640832 | lincRNA          | 4  | 190802670 | 190806023             |
| ENSG00000250673 | 0           | 1.353254395 | protein_coding   | 4  | 147145709 | 147150208             |
| ENSG00000250677 | 0.499066092 | 0.390640832 | pseudogene       | 4  | 84158456  | 84158597              |
| ENSG00000250697 | 2.10647801  | 2.501982735 | processed_transc | 5  | 32925745  | 33298016              |
| ENSG00000250699 | 0.499066092 | 0.390640832 | protein_coding   | 11 | 117187078 | 117198754             |
| ENSG00000250703 | 0           | 0.390640832 | pseudogene       | 5  | 26670443  | 26670590              |
| ENSG00000250705 | 0.499066092 | 0           | pseudogene       | 5  | 87898598  | 87898935              |
| ENSG00000250719 | 0.499066092 | 0           | processed_transc | 1  | 46641158  | 46642150              |
| ENSG00000250727 | 0.499066092 | 0           | pseudogene       | 8  | 125154129 | 125155753             |
| ENSG00000250731 | 1.616589159 | 1.16600992  | pseudogene       | 19 | 53982604  | 53983345 TPM3P6       |
| ENSG00000250733 | 0.499066092 | 0           | protein_coding   | 8  | 140943416 | 140946190 C8orf17     |
| ENSG00000250734 | 0.499066092 | 0.697730409 | processed_transc | 1  | 151584514 | 151585839             |
| ENSG00000250742 | 1.960915222 | 3.532712221 | lincRNA          | 12 | 54519882  | 54526627              |
| ENSG00000250746 | 0.869158192 | 0           | pseudogene       | 4  | 165109463 | 165111519             |
| ENSG00000250748 | 2.762599152 | 1.802319292 | lincRNA          | 12 | 65860600  | 66036152              |
| ENSG00000250751 | 0           | 0.697730409 | antisense        | 17 | 47785696  | 47797422              |
| ENSG00000250752 | 0           | 0.390640832 | pseudogene       | 8  | 6756400   | 6756990               |
| ENSG00000250762 | 2.35979773  | 2.039052734 | pseudogene       | 1  | 167789136 | 167789486             |
| ENSG00000250763 | 4.800350936 | 5.045726316 | processed_transc | 5  | 69274357  | 69293569              |
| ENSG00000250764 | 3.004694206 | 2.144285137 | antisense        | 5  | 32103551  | 32122047              |
| ENSG00000250769 | 0.499066092 | 0.390640832 | pseudogene       | 4  | 49509781  | 49510641              |
| ENSG00000250770 | 2.238690726 | 1.16600992  | lincRNA          | 12 | 3405368   | 3409390               |
| ENSG00000250771 | 0.869158192 | 1.925536307 | pseudogene       | 4  | 154599411 | 154601702             |
| ENSG00000250784 | 3.393122761 | 3.714580548 | processed_transc | 1  | 155108373 | 155109607             |
| ENSG00000250786 | 5.958104008 | 5.486957566 | lincRNA          | 5  | 9546312   | 9550721               |
| ENSG00000250787 | 0           | 0.390640832 | pseudogene       | 5  | 55677608  | 55677902 HMGN1P17     |
| ENSG00000250790 | 3.950976309 | 3.96493948  | lincRNA          | 12 | 133488056 | 133491318             |
| ENSG00000250794 | 2.10647801  | 1.802319292 | pseudogene       | 8  | 12278541  | 12282509              |
| ENSG00000250802 | 2.847891871 | 3.453019579 | processed_transc | 5  | 76382565  | 76462734              |
| ENSG00000250803 | 0           | 0.390640832 | pseudogene       | 5  | 121493063 | 121518353             |
| ENSG00000250808 | 0           | 0.390640832 | pseudogene       | 5  | 5396085   | 5396448               |
| ENSG00000250814 | 0           | 0.390640832 | lincRNA          | 5  | 9854489   | 9890049               |
| ENSG00000250816 | 1.16343121  | 0.390640832 | pseudogene       | 5  | 17202383  | 17203254              |
| ENSG00000250833 | 0           | 0.390640832 | pseudogene       | 10 | 30642635  | 30646294 DNM1P17      |

|                 |             |             |                    |    |           |           |              |
|-----------------|-------------|-------------|--------------------|----|-----------|-----------|--------------|
| ENSG00000250841 | 0.869158192 |             | 0 sense_intronic   | 5  | 10594938  | 10596322  | ANKRD33B-IT1 |
| ENSG00000250842 | 0.499066092 |             | 0 lincRNA          | 5  | 144717495 | 144761233 |              |
| ENSG00000250848 | 1.407729925 | 2.039052734 | pseudogene         | 5  | 288948    | 290436    |              |
| ENSG00000250853 | 1.407729925 | 0.390640832 | pseudogene         | 5  | 54825984  | 54826529  | RNF138P1     |
| ENSG00000250854 | 0.869158192 | 0.390640832 | antisense          | 5  | 52965911  | 52968075  |              |
| ENSG00000250859 | 1.16343121  | 0.950786998 | pseudogene         | 5  | 126847156 | 126848534 | HNRNPKP1     |
| ENSG00000250866 | 0.499066092 | 0.390640832 | antisense          | 5  | 5142251   | 5176327   |              |
| ENSG00000250869 | 0.869158192 | 0.950786998 | pseudogene         | 8  | 68045789  | 68048146  |              |
| ENSG00000250889 | 0.499066092 | 1.925536307 | lincRNA            | 5  | 74343544  | 74348668  |              |
| ENSG00000250892 | 3.448790144 | 2.788380093 | pseudogene         | 4  | 195198    | 198798    |              |
| ENSG00000250893 | 0.499066092 |             | 0 antisense        | 4  | 40428136  | 40429602  |              |
| ENSG00000250896 | 1.16343121  | 0.697730409 | pseudogene         | 4  | 11373599  | 11374516  | RNPS1P1      |
| ENSG00000250899 | 7.093410923 | 5.96747225  | lincRNA            | 12 | 3150603   | 3154116   |              |
| ENSG00000250900 | 0           | 0.697730409 | antisense          | 5  | 180622496 | 180630103 |              |
| ENSG00000250903 | 4.19837882  | 4.777836593 | processed_transc   | 6  | 2245982   | 2413825   |              |
| ENSG00000250906 | 0.499066092 |             | 0 antisense        | 4  | 40814796  | 40828168  |              |
| ENSG00000250909 | 1.407729925 | 1.925536307 | antisense          | 5  | 175774944 | 175780587 |              |
| ENSG00000250917 | 2.35979773  | 2.242360793 | processed_transc   | 20 | 32822646  | 32868979  |              |
| ENSG00000250918 | 0           | 0.697730409 | pseudogene         | 5  | 69825198  | 69826377  |              |
| ENSG00000250927 | 0.499066092 |             | 0 pseudogene       | 4  | 28824866  | 28825833  | MESTP3       |
| ENSG00000250929 | 0           | 0.390640832 | processed_transc   | 8  | 104133260 | 104145194 |              |
| ENSG00000250937 | 0.869158192 | 0.390640832 | lincRNA            | 12 | 8404007   | 8450140   |              |
| ENSG00000250938 | 0.499066092 | 0.950786998 | processed_transc   | 4  | 120988113 | 121337921 |              |
| ENSG00000250948 | 0           | 0.390640832 | antisense          | 17 | 47452742  | 47457456  |              |
| ENSG00000250950 | 2.35979773  | 3.279072565 | processed_transc   | 4  | 120377505 | 120378432 |              |
| ENSG00000250954 | 0.499066092 |             | 0 lincRNA          | 4  | 33777969  | 34041515  |              |
| ENSG00000250956 | 0.499066092 | 1.16600992  | pseudogene         | 5  | 126515448 | 126515592 |              |
| ENSG00000250959 | 3.78787645  | 3.87606762  | pseudogene         | 10 | 75490320  | 75497069  | C10orf102    |
| ENSG00000250966 | 0           | 0.697730409 | pseudogene         | 4  | 113486144 | 113486527 |              |
| ENSG00000250970 | 0.499066092 | 2.652276565 | processed_transc   | 1  | 154675205 | 154680702 |              |
| ENSG00000250978 | 0           | 0.390640832 | lincRNA            | 5  | 66759637  | 66771420  |              |
| ENSG00000250980 | 0           | 1.16600992  | pseudogene         | 4  | 153717215 | 153717983 |              |
| ENSG00000250982 | 3.004694206 | 2.652276565 | pseudogene         | 16 | 28251014  | 28251989  |              |
| ENSG00000250986 | 1.616589159 | 0.950786998 | processed_transc   | 4  | 3760475   | 3765117   |              |
| ENSG00000250988 | 4.381167248 | 4.826083323 | processed_transc   | 15 | 83419316  | 83425958  |              |
| ENSG00000250989 | 1.16343121  | 1.353254395 | pseudogene         | 9  | 38543101  | 38543443  |              |
| ENSG00000250990 | 0           | 0.390640832 | antisense          | 7  | 76875657  | 76887440  |              |
| ENSG00000250991 | 2.238690726 | 3.279072565 | pseudogene         | 6  | 29709508  | 29716746  | MICE         |
| ENSG00000250994 | 0.499066092 |             | 0 lincRNA          | 5  | 133772402 | 133828210 |              |
| ENSG00000250995 | 0.499066092 |             | 0 pseudogene       | X  | 117903759 | 117904820 |              |
| ENSG00000250999 | 0.499066092 | 0.697730409 | antisense          | 5  | 179084763 | 179091433 |              |
| ENSG00000251000 | 0.869158192 | 0.390640832 | pseudogene         | 5  | 95170128  | 95170750  |              |
| ENSG00000251002 | 0.499066092 | 0.390640832 | processed_transc   | 14 | 22849083  | 22951948  |              |
| ENSG00000251003 | 5.301468762 | 5.6022688   | processed_transc   | 8  | 106792474 | 107072752 |              |
| ENSG00000251009 | 0           | 0.390640832 | lincRNA            | 4  | 25866503  | 25871172  |              |
| ENSG00000251013 | 0.869158192 |             | 0 pseudogene       | 8  | 101562952 | 101563941 | GAPDHP62     |
| ENSG00000251015 | 0.869158192 | 0.697730409 | lincRNA            | 13 | 45992297  | 45994506  | SLC25A30-AS1 |
| ENSG00000251017 | 0.499066092 | 0.390640832 | pseudogene         | 4  | 74951712  | 74952389  |              |
| ENSG00000251018 | 0           | 0.697730409 | antisense          | 5  | 162910071 | 162921064 |              |
| ENSG00000251020 | 0.499066092 | 0.697730409 | processed_transc   | 1  | 27218269  | 27219052  |              |
| ENSG00000251022 | 8.652173596 | 8.559493622 | processed_transc   | 4  | 83814639  | 83822113  |              |
| ENSG00000251023 | 0.869158192 | 0.390640832 | sense_intronic     | 5  | 93196375  | 93199531  |              |
| ENSG00000251034 | 2.928422289 | 3.411459265 | antisense          | 8  | 22398358  | 22402918  |              |
| ENSG00000251046 | 3.502389126 | 3.781359661 | pseudogene         | 4  | 111337438 | 111339511 |              |
| ENSG00000251050 | 1.407729925 | 2.144285137 | pseudogene         | 5  | 79315432  | 79315743  |              |
| ENSG00000251054 | 0           | 0.697730409 | lincRNA            | 5  | 96559075  | 96563661  |              |
| ENSG00000251056 | 0           | 0.390640832 | pseudogene         | 4  | 49504162  | 49508039  | ANKRD20A17P  |
| ENSG00000251059 | 0.499066092 |             | 0 antisense        | 4  | 82086094  | 82114549  |              |
| ENSG00000251063 | 0.499066092 |             | 0 processed_transc | 10 | 98133458  | 98135109  |              |
| ENSG00000251072 | 0           | 0.390640832 | antisense          | 5  | 126091229 | 126112178 |              |
| ENSG00000251079 | 3.393122761 | 2.501982735 | pseudogene         | 10 | 47228366  | 47241942  | BMS1P2       |
| ENSG00000251085 | 0.869158192 | 1.353254395 | lincRNA            | 17 | 48292055  | 48292781  |              |
| ENSG00000251087 | 0.499066092 |             | 0 pseudogene       | 4  | 9705374   | 9712436   |              |

|                 |             |             |                  |    |           |                        |
|-----------------|-------------|-------------|------------------|----|-----------|------------------------|
| ENSG00000251093 | 0           | 0.390640832 | lincRNA          | 5  | 90522292  | 90522888               |
| ENSG00000251102 | 0.869158192 | 0.950786998 | pseudogene       | 5  | 97912045  | 97912964               |
| ENSG00000251107 | 0           | 1.802319292 | pseudogene       | 5  | 75576781  | 75577092               |
| ENSG00000251111 | 0.499066092 | 0.390640832 | pseudogene       | 4  | 56217980  | 56218575               |
| ENSG00000251127 | 2.57521082  | 0.697730409 | lincRNA          | 8  | 62671653  | 62678528               |
| ENSG00000251128 | 0           | 0.697730409 | antisense        | 4  | 184154781 | 184161787              |
| ENSG00000251129 | 0.499066092 | 0           | lincRNA          | 4  | 31999019  | 32157028               |
| ENSG00000251131 | 0.869158192 | 1.16600992  | antisense        | 5  | 43018531  | 43024349               |
| ENSG00000251136 | 5.752272083 | 5.41517489  | processed_transc | 8  | 90621629  | 90769955               |
| ENSG00000251139 | 0.869158192 | 0.390640832 | protein_coding   | 4  | 185734773 | 185742443              |
| ENSG00000251141 | 3.146112541 | 2.420525079 | antisense        | 5  | 44745002  | 44808879               |
| ENSG00000251143 | 3.077135474 | 2.851901313 | antisense        | 11 | 71725337  | 71731956               |
| ENSG00000251144 | 5.107569429 | 4.319727133 | lincRNA          | 5  | 174247030 | 174253327              |
| ENSG00000251148 | 0           | 0.390640832 | antisense        | 4  | 2297311   | 2320816                |
| ENSG00000251151 | 0.499066092 | 2.334191469 | antisense        | 12 | 54375293  | 54379303               |
| ENSG00000251152 | 0.869158192 | 0           | lincRNA          | 4  | 11470874  | 11479820               |
| ENSG00000251160 | 0.869158192 | 0.950786998 | processed_transc | 4  | 35949843  | 36075457               |
| ENSG00000251161 | 1.616589159 | 0.390640832 | lincRNA          | 15 | 41199009  | 41201540               |
| ENSG00000251163 | 0.499066092 | 0           | pseudogene       | 5  | 42897364  | 42897934               |
| ENSG00000251164 | 0           | 0.390640832 | lincRNA          | 6  | 8652370   | 8654079 HULC           |
| ENSG00000251169 | 1.407729925 | 0.390640832 | lincRNA          | 5  | 133842243 | 133844415              |
| ENSG00000251171 | 0.499066092 | 0.697730409 | antisense        | 4  | 170122945 | 170141500              |
| ENSG00000251175 | 0.499066092 | 0.390640832 | antisense        | 4  | 106667402 | 106748329              |
| ENSG00000251179 | 2.238690726 | 2.652276565 | antisense        | 17 | 48358938  | 48365216               |
| ENSG00000251188 | 4.062237333 | 3.96493948  | pseudogene       | 4  | 262771    | 263320                 |
| ENSG00000251192 | 5.672682881 | 6.281901708 | protein_coding X | 4  | 46357162  | 46404892 ZNF674        |
| ENSG00000251194 | 4.165528823 | 4.448594745 | sense_intronic   | 11 | 35234097  | 35235554               |
| ENSG00000251196 | 5.107569429 | 4.274079748 | pseudogene       | 5  | 10652323  | 10656037               |
| ENSG00000251201 | 1.16343121  | 0           | protein_coding   | 5  | 114914339 | 114961858 TMED7-TICAM2 |
| ENSG00000251203 | 1.16343121  | 0.950786998 | pseudogene       | 8  | 26290545  | 26291581               |
| ENSG00000251211 | 0.869158192 | 0           | pseudogene       | 5  | 177592703 | 177593563              |
| ENSG00000251221 | 0.869158192 | 1.802319292 | lincRNA          | 5  | 79904442  | 79918343               |
| ENSG00000251224 | 0.499066092 | 0           | antisense        | 3  | 32772127  | 32778946 CNOT10-AS1    |
| ENSG00000251229 | 2.10647801  | 1.667587519 | pseudogene       | 4  | 2506808   | 2508006                |
| ENSG00000251230 | 0.499066092 | 0           | processed_transc | 4  | 185765739 | 185776905              |
| ENSG00000251234 | 0.869158192 | 0.390640832 | pseudogene       | 8  | 94951592  | 94955105               |
| ENSG00000251235 | 0.869158192 | 0.390640832 | pseudogene       | 5  | 75672500  | 75672974               |
| ENSG00000251247 | 3.950976309 | 4.406904905 | protein_coding   | 19 | 37341780  | 37383936 ZNF345        |
| ENSG00000251257 | 0.499066092 | 0.390640832 | antisense        | 5  | 38461029  | 38468441               |
| ENSG00000251258 | 0.499066092 | 0           | protein_coding   | 6  | 112668532 | 112672498 RFPL4B       |
| ENSG00000251259 | 1.407729925 | 1.16600992  | lincRNA          | 4  | 106058437 | 106061776              |
| ENSG00000251267 | 2.762599152 | 3.183544561 | processed_transc | 22 | 38616982  | 38618939               |
| ENSG00000251271 | 1.16343121  | 0           | pseudogene       | 4  | 3937174   | 3944248                |
| ENSG00000251273 | 0.499066092 | 0.950786998 | lincRNA          | 5  | 25126414  | 25190765               |
| ENSG00000251279 | 0.499066092 | 0           | antisense        | 5  | 60457897  | 60527867               |
| ENSG00000251281 | 0           | 0.697730409 | lincRNA          | 5  | 33011428  | 33017713               |
| ENSG00000251286 | 0           | 0.390640832 | pseudogene       | 4  | 53306721  | 53307701               |
| ENSG00000251287 | 1.960915222 | 1.667587519 | pseudogene       | 3  | 129800674 | 129832070              |
| ENSG00000251288 | 0.499066092 | 1.802319292 | pseudogene       | 4  | 103672558 | 103673794              |
| ENSG00000251298 | 0           | 0.697730409 | antisense        | 4  | 148530703 | 148538396              |
| ENSG00000251301 | 0           | 0.390640832 | lincRNA          | 12 | 68726668  | 68845443               |
| ENSG00000251303 | 0           | 0.697730409 | pseudogene       | 5  | 59926341  | 59926800               |
| ENSG00000251307 | 1.407729925 | 0.697730409 | antisense        | 5  | 54529762  | 54591029               |
| ENSG00000251310 | 0.499066092 | 0           | lincRNA          | 4  | 190114254 | 190126031              |
| ENSG00000251314 | 0           | 0.950786998 | processed_transc | 5  | 95297705  | 95970220               |
| ENSG00000251320 | 0           | 2.242360793 | antisense        | 5  | 147266675 | 147267267              |
| ENSG00000251322 | 1.16343121  | 1.16600992  | protein_coding   | 22 | 51113070  | 51171641 SHANK3        |
| ENSG00000251323 | 1.960915222 | 2.039052734 | lincRNA          | 11 | 78135028  | 78140882               |
| ENSG00000251324 | 0           | 0.390640832 | antisense        | 5  | 72750012  | 72768721               |
| ENSG00000251330 | 0.869158192 | 0           | antisense        | 5  | 147809722 | 147810370              |
| ENSG00000251332 | 0.499066092 | 0.697730409 | pseudogene       | 4  | 37997115  | 37997824               |
| ENSG00000251333 | 0.499066092 | 1.16600992  | pseudogene       | 4  | 146296693 | 146297405 RTN3P1       |
| ENSG00000251339 | 0.499066092 | 0           | lincRNA          | 4  | 59646791  | 59849870               |



|                 |             |             |                  |    |           |                    |
|-----------------|-------------|-------------|------------------|----|-----------|--------------------|
| ENSG00000251340 | 0           | 0.950786998 | pseudogene       | 5  | 93905245  | 93906381           |
| ENSG00000251348 | 2.10647801  | 1.353254395 | pseudogene       | 5  | 95104703  | 95106404 HSPD1P11  |
| ENSG00000251350 | 0.869158192 | 0.697730409 | processed_transc | 4  | 44018878  | 44024080           |
| ENSG00000251352 | 0           | 0.390640832 | pseudogene       | 5  | 180098892 | 180099598          |
| ENSG00000251354 | 0.499066092 | 0.697730409 | pseudogene       | 8  | 48459366  | 48460488           |
| ENSG00000251359 | 1.16343121  | 2.971122874 | protein_coding   | 4  | 184018188 | 184020352 C4orf38  |
| ENSG00000251361 | 0.869158192 | 0.390640832 | lincRNA          | 5  | 92355369  | 92404375           |
| ENSG00000251364 | 2.238690726 | 2.652276565 | processed_transc | 11 | 7448497   | 7533746            |
| ENSG00000251365 | 1.16343121  | 0.697730409 | lincRNA          | 5  | 6766004   | 6772066            |
| ENSG00000251370 | 0.499066092 | 0           | lincRNA          | 5  | 9511445   | 9518198            |
| ENSG00000251374 | 0           | 0.697730409 | pseudogene       | 5  | 81560976  | 81561078 RPS23P5   |
| ENSG00000251377 | 0           | 0.390640832 | lincRNA          | 4  | 153128573 | 153147022          |
| ENSG00000251378 | 0.499066092 | 0.390640832 | pseudogene       | 7  | 45858181  | 45858696           |
| ENSG00000251381 | 0.499066092 | 0           | processed_transc | 11 | 12984057  | 13011095           |
| ENSG00000251387 | 0.499066092 | 0           | lincRNA          | 5  | 139152113 | 139154991          |
| ENSG00000251389 | 0           | 0.697730409 | pseudogene       | 5  | 96704480  | 96706125 YTHDF1P1  |
| ENSG00000251390 | 1.960915222 | 2.420525079 | processed_transc | 20 | 826100    | 837992             |
| ENSG00000251391 | 0.499066092 | 0.697730409 | lincRNA          | 5  | 65492117  | 65867801           |
| ENSG00000251393 | 0.869158192 | 0.390640832 | processed_transc | 14 | 73929129  | 73943880           |
| ENSG00000251396 | 2.10647801  | 2.788380093 | processed_transc | 8  | 61297147  | 61429354           |
| ENSG00000251400 | 0.869158192 | 1.353254395 | pseudogene       | 5  | 76586093  | 76587625 ALDH7A1P1 |
| ENSG00000251405 | 0           | 1.353254395 | processed_transc | 5  | 156789623 | 156887086          |
| ENSG00000251410 | 0           | 0.390640832 | lincRNA          | 4  | 27969345  | 27986685           |
| ENSG00000251411 | 2.238690726 | 1.925536307 | pseudogene       | 4  | 87834419  | 87835970           |
| ENSG00000251414 | 2.35979773  | 2.242360793 | antisense        | 5  | 175781209 | 175783171          |
| ENSG00000251417 | 2.238690726 | 2.971122874 | lincRNA          | 16 | 28814097  | 28829149           |
| ENSG00000251418 | 0           | 0.390640832 | pseudogene       | 4  | 149447645 | 149448293          |
| ENSG00000251423 | 0.499066092 | 0.390640832 | antisense        | 5  | 13860447  | 13897880           |
| ENSG00000251429 | 0           | 0.390640832 | pseudogene       | 4  | 159191530 | 159199828          |
| ENSG00000251432 | 3.744048221 | 5.212303549 | processed_transc | 4  | 129213906 | 129440549          |
| ENSG00000251435 | 0.499066092 | 0.390640832 | pseudogene       | 5  | 55488357  | 55489460           |
| ENSG00000251441 | 1.407729925 | 1.353254395 | pseudogene       | 4  | 113277291 | 113280900          |
| ENSG00000251442 | 3.830412367 | 3.813624741 | processed_transc | 4  | 79567057  | 79603853           |
| ENSG00000251443 | 0           | 0.390640832 | lincRNA          | 5  | 33229841  | 33255659           |
| ENSG00000251450 | 0           | 0.390640832 | antisense        | 5  | 80243516  | 80256726           |
| ENSG00000251451 | 1.407729925 | 0.950786998 | pseudogene       | 7  | 65872275  | 65874226           |
| ENSG00000251453 | 0.499066092 | 0           | pseudogene       | 5  | 139961089 | 139961920          |
| ENSG00000251455 | 2.238690726 | 1.925536307 | antisense        | 4  | 152595635 | 152599045          |
| ENSG00000251459 | 0           | 0.390640832 | lincRNA          | 4  | 58357556  | 58361399           |
| ENSG00000251463 | 1.16343121  | 0.390640832 | pseudogene       | 4  | 119114560 | 119115908          |
| ENSG00000251467 | 1.16343121  | 0.390640832 | pseudogene       | 5  | 72292747  | 72293469           |
| ENSG00000251470 | 0.499066092 | 0           | pseudogene       | 8  | 47609252  | 47610310 ASNSP4    |
| ENSG00000251474 | 6.851544845 | 6.766973175 | pseudogene       | 3  | 129101765 | 129118498 RPL32P3  |
| ENSG00000251476 | 0           | 0.950786998 | pseudogene       | 5  | 5396586   | 5397081            |
| ENSG00000251484 | 0           | 1.16600992  | pseudogene       | 1  | 109646053 | 109647388          |
| ENSG00000251485 | 1.799000381 | 2.144285137 | pseudogene       | 2  | 233207826 | 233208613          |
| ENSG00000251495 | 1.16343121  | 0.390640832 | pseudogene       | 5  | 81305421  | 81305913 PPIAP11   |
| ENSG00000251497 | 1.16343121  | 1.353254395 | lincRNA          | 12 | 123565931 | 123569291          |
| ENSG00000251499 | 0           | 0.950786998 | processed_transc | 6  | 2749422   | 2765826            |
| ENSG00000251520 | 0.869158192 | 0.697730409 | pseudogene       | 1  | 180933647 | 180935045          |
| ENSG00000251521 | 0.499066092 | 0           | pseudogene       | 8  | 82517804  | 82543369 IMPA1P    |
| ENSG00000251523 | 1.16343121  | 0.390640832 | antisense        | 4  | 99417515  | 99431086           |
| ENSG00000251532 | 0.499066092 | 0.390640832 | lincRNA          | 5  | 1544222   | 1551825            |
| ENSG00000251533 | 1.616589159 | 1.925536307 | lincRNA          | 14 | 103653558 | 103655365          |
| ENSG00000251535 | 0           | 0.390640832 | pseudogene       | 4  | 330047    | 330575             |
| ENSG00000251537 | 3.78787645  | 3.748356452 | protein_coding   | 17 | 15474805  | 15554967           |
| ENSG00000251540 | 1.16343121  | 1.518964905 | processed_transc | 9  | 115196096 | 115246906          |
| ENSG00000251544 | 0           | 1.353254395 | pseudogene       | 5  | 93903166  | 93904614 MTND5P12  |
| ENSG00000251548 | 0           | 0.390640832 | pseudogene       | 5  | 10664607  | 10665225           |
| ENSG00000251552 | 0.499066092 | 0           | pseudogene       | 5  | 82575740  | 82576463           |
| ENSG00000251555 | 0           | 0.390640832 | lincRNA          | 4  | 132851186 | 132897107          |
| ENSG00000251556 | 1.799000381 | 2.579085888 | antisense        | 5  | 145478969 | 145499975          |
| ENSG00000251562 | 12.08478828 | 12.45811423 | processed_transc | 11 | 65265233  | 65273940 MALAT1    |

|                 |             |             |                  |    |           |                      |
|-----------------|-------------|-------------|------------------|----|-----------|----------------------|
| ENSG00000251563 | 0           | 0.950786998 | pseudogene       | 8  | 88610690  | 88613862             |
| ENSG00000251568 | 0.499066092 | 0.390640832 | pseudogene       | 5  | 5375836   | 5376949              |
| ENSG00000251571 | 0           | 0.390640832 | pseudogene       | 4  | 104493246 | 104495239 DDX3YP3    |
| ENSG00000251576 | 0.499066092 | 0.390640832 | non_coding       | 3  | 14389951  | 14394068             |
| ENSG00000251579 | 0.499066092 | 0.390640832 | pseudogene       | 3  | 130646598 | 130647120            |
| ENSG00000251580 | 0.499066092 | 0.950786998 | antisense        | 4  | 6672452   | 6675557              |
| ENSG00000251582 | 3.146112541 | 1.667587519 | processed_transc | 10 | 75432880  | 75435692             |
| ENSG00000251583 | 0.869158192 | 0.697730409 | pseudogene       | 5  | 149311577 | 149312231            |
| ENSG00000251586 | 0.499066092 | 0           | antisense        | 4  | 106092511 | 106099220 TET2-AS1   |
| ENSG00000251587 | 0.869158192 | 0           | pseudogene       | 4  | 4895909   | 4896900 LDHAP1       |
| ENSG00000251593 | 2.762599152 | 3.32456471  | pseudogene       | 5  | 25909612  | 25911343 MSNP1       |
| ENSG00000251595 | 4.19837882  | 3.813624741 | pseudogene       | 4  | 419224    | 467918 ABCA11P       |
| ENSG00000251596 | 0.499066092 | 1.667587519 | pseudogene       | 4  | 166325219 | 166327502 HADHAP1    |
| ENSG00000251602 | 3.989024711 | 3.935919592 | antisense        | 14 | 105883221 | 105886076            |
| ENSG00000251603 | 3.950976309 | 3.748356452 | antisense        | 4  | 152588376 | 152591654            |
| ENSG00000251604 | 0.869158192 | 1.518964905 | lincRNA          | 5  | 72747323  | 72749220             |
| ENSG00000251606 | 0           | 0.390640832 | protein_coding   | 5  | 96424779  | 96519354             |
| ENSG00000251611 | 2.35979773  | 1.667587519 | lincRNA          | 4  | 152328703 | 152329987            |
| ENSG00000251614 | 0.499066092 | 0.390640832 | pseudogene       | 3  | 132364675 | 132369227            |
| ENSG00000251615 | 4.568725997 | 5.212303549 | lincRNA          | 4  | 8357038   | 8359103              |
| ENSG00000251629 | 0           | 0.697730409 | lincRNA          | 5  | 20611949  | 20937800             |
| ENSG00000251637 | 0.869158192 | 1.802319292 | lincRNA          | 11 | 67653948  | 67673821             |
| ENSG00000251639 | 1.960915222 | 1.353254395 | pseudogene       | 4  | 1093831   | 1095346              |
| ENSG00000251648 | 0           | 0.390640832 | pseudogene       | 5  | 65028800  | 65029481             |
| ENSG00000251652 | 1.799000381 | 1.802319292 | antisense        | 4  | 1107427   | 1126765              |
| ENSG00000251661 | 1.616589159 | 0           | processed_transc | 11 | 318640    | 319615               |
| ENSG00000251664 | 4.381167248 | 4.202780776 | protein_coding   | 5  | 140255058 | 140391929 PCDHA12    |
| ENSG00000251666 | 0.869158192 | 1.667587519 | sense_intronic   | 5  | 176478715 | 176479964 ZNF346-IT1 |
| ENSG00000251667 | 0.869158192 | 1.667587519 | pseudogene       | 5  | 175735066 | 175736016            |
| ENSG00000251669 | 4.618121645 | 4.841813558 | pseudogene       | 4  | 3943487   | 3957146 FAM86EP      |
| ENSG00000251675 | 0.499066092 | 1.16600992  | antisense        | 5  | 79424184  | 79439706             |
| ENSG00000251682 | 1.960915222 | 0           | pseudogene       | 5  | 60642953  | 60643543             |
| ENSG00000251687 | 0.499066092 | 0.950786998 | antisense        | 4  | 146754270 | 146760732            |
| ENSG00000251689 | 2.10647801  | 2.579085888 | pseudogene       | 4  | 263655    | 263964               |
| ENSG00000251692 | 0.499066092 | 1.667587519 | protein_coding   | 16 | 1535887   | 1538982 PTX4         |
| ENSG00000251703 | 0.499066092 | 0           | snRNA            | 4  | 57868858  | 57868958             |
| ENSG00000251705 | 8.649206367 | 9.186944555 | rRNA             | Y  | 10037764  | 10037915 RN5-8S6     |
| ENSG00000251713 | 0.499066092 | 0           | miRNA            | 20 | 18150549  | 18150633             |
| ENSG00000251717 | 0           | 0.390640832 | rRNA             | 16 | 34988167  | 34988301             |
| ENSG00000251720 | 0           | 0.390640832 | snRNA            | 1  | 64002382  | 64002441             |
| ENSG00000251721 | 0.869158192 | 0           | snoRNA           | 2  | 159390712 | 159390796            |
| ENSG00000251728 | 0.499066092 | 0           | misc_RNA         | 7  | 139794497 | 139794592            |
| ENSG00000251733 | 0.499066092 | 0           | snoRNA           | 9  | 19063654  | 19063784 SCARNA8     |
| ENSG00000251737 | 0.499066092 | 0           | snoRNA           | 22 | 18124172  | 18124285             |
| ENSG00000251739 | 0.869158192 | 0.390640832 | snRNA            | 4  | 184627084 | 184627184            |
| ENSG00000251756 | 0.869158192 | 0.390640832 | rRNA             | 14 | 52159470  | 52159579             |
| ENSG00000251765 | 0.499066092 | 0.390640832 | miRNA            | 14 | 77870251  | 77870336             |
| ENSG00000251771 | 0           | 0.390640832 | snRNA            | 14 | 52071557  | 52071618             |
| ENSG00000251774 | 0           | 0.950786998 | snRNA            | 3  | 12556205  | 12556306             |
| ENSG00000251775 | 0.499066092 | 0.390640832 | snoRNA           | 2  | 64110383  | 64110525             |
| ENSG00000251786 | 0.869158192 | 0           | misc_RNA         | 17 | 19552807  | 19552900             |
| ENSG00000251787 | 0.499066092 | 0.697730409 | snRNA            | 3  | 142520049 | 142520110 RNU7-47P   |
| ENSG00000251791 | 2.238690726 | 1.802319292 | snoRNA           | 2  | 234197322 | 234197586 SCARNA6    |
| ENSG00000251794 | 0           | 0.697730409 | snRNA            | 16 | 74490439  | 74490509             |
| ENSG00000251795 | 3.077135474 | 2.721932731 | snoRNA           | 1  | 93303575  | 93303627             |
| ENSG00000251806 | 2.238690726 | 2.420525079 | snoRNA           | 20 | 2443608   | 2443683 SNORD119     |
| ENSG00000251815 | 0.499066092 | 0.697730409 | snoRNA           | 15 | 25344646  | 25344741 SNORD116-26 |
| ENSG00000251819 | 0           | 0.390640832 | snRNA            | 15 | 101092025 | 101092127            |
| ENSG00000251821 | 0.499066092 | 0           | snRNA            | 4  | 128813146 | 128813237            |
| ENSG00000251823 | 0           | 0.390640832 | rRNA             | 4  | 57197343  | 57197383 RN5S162     |
| ENSG00000251826 | 6.103936836 | 6.246885341 | miRNA            | 1  | 237766512 | 237766585            |
| ENSG00000251860 | 0.499066092 | 0           | snoRNA           | 17 | 7514499   | 7514591              |
| ENSG00000251866 | 0           | 0.390640832 | snoRNA           | 1  | 15868660  | 15868799             |

|                 |             |             |            |    |           |                      |
|-----------------|-------------|-------------|------------|----|-----------|----------------------|
| ENSG00000251868 | 0.869158192 |             | 0 snRNA    | 16 | 72855832  | 72855891 RNU7-71P    |
| ENSG00000251870 | 0.499066092 |             | 0 snRNA    | 18 | 56593429  | 56593528             |
| ENSG00000251880 | 1.407729925 | 0.950786998 | snRNA      | 5  | 37327237  | 37327298 RNU7-75P    |
| ENSG00000251889 | 0           | 0.390640832 | snRNA      | 2  | 48567826  | 48567965             |
| ENSG00000251890 | 0           | 0.697730409 | rRNA       | 22 | 33031088  | 33031184             |
| ENSG00000251891 | 0.499066092 |             | 0 snRNA    | 15 | 85933054  | 85933115 RNU7-79P    |
| ENSG00000251896 | 0.499066092 |             | 0 snoRNA   | 15 | 25346722  | 25346813 SNORD116-27 |
| ENSG00000251898 | 0.869158192 |             | 0 snoRNA   | 12 | 6690640   | 6690775 SCARNA11     |
| ENSG00000251933 | 0.499066092 |             | 0 miRNA    | 1  | 224910169 | 224910243            |
| ENSG00000251938 | 0.499066092 |             | 0 snoRNA   | 3  | 47130098  | 47130169             |
| ENSG00000251939 | 0.499066092 | 0.390640832 | snRNA      | 18 | 43701581  | 43701687             |
| ENSG00000251945 | 0           | 0.950786998 | rRNA       | 16 | 34980894  | 34981007             |
| ENSG00000251948 | 12.37197404 | 12.48716136 | miRNA      | 19 | 24184075  | 24184165             |
| ENSG00000251957 | 0.499066092 | 1.16600992  | snRNA      | 10 | 11965180  | 11965287             |
| ENSG00000251971 | 0           | 0.390640832 | snRNA      | 2  | 238937612 | 238937704            |
| ENSG00000251978 | 1.16343121  | 1.518964905 | rRNA       | 7  | 106422046 | 106422161 RN5S236    |
| ENSG00000251984 | 0           | 0.390640832 | snRNA      | 22 | 30306777  | 30306829 RNU5F-5P    |
| ENSG00000251985 | 0.869158192 |             | 0 snRNA    | 22 | 46020411  | 46020512             |
| ENSG00000251988 | 0.869158192 | 1.16600992  | snRNA      | 6  | 160141447 | 160141572            |
| ENSG00000251991 | 0.499066092 | 0.697730409 | snRNA      | 11 | 14500438  | 14500499 RNU7-49P    |
| ENSG00000251992 | 3.004694206 | 3.714580548 | snoRNA     | 18 | 47340503  | 47340646 SCARNA17    |
| ENSG00000251994 | 2.35979773  | 2.420525079 | snRNA      | 18 | 9518117   | 9518258              |
| ENSG00000252007 | 1.960915222 | 1.518964905 | miRNA      | 19 | 10778447  | 10778519             |
| ENSG00000252010 | 0           | 0.390640832 | snoRNA     | 2  | 234184373 | 234184648 SCARNA5    |
| ENSG00000252011 | 0           | 0.390640832 | snoRNA     | 1  | 246996750 | 246996831            |
| ENSG00000252026 | 0.499066092 |             | 0 snRNA    | 16 | 68318126  | 68318221             |
| ENSG00000252032 | 0.499066092 |             | 0 snRNA    | 1  | 52004297  | 52004401             |
| ENSG00000252042 | 1.407729925 | 2.242360793 | misc_RNA   | 17 | 73141765  | 73141857             |
| ENSG00000252043 | 0           | 0.390640832 | rRNA       | 16 | 34981143  | 34981265             |
| ENSG00000252048 | 0           | 0.950786998 | snoRNA     | 4  | 184097914 | 184098084            |
| ENSG00000252050 | 0           | 0.390640832 | snoRNA     | X  | 38167365  | 38167494             |
| ENSG00000252058 | 0           | 0.697730409 | snoRNA     | 20 | 4863030   | 4863122              |
| ENSG00000252060 | 1.16343121  | 0.390640832 | rRNA       | 19 | 12107624  | 12107731             |
| ENSG00000252061 | 0.869158192 |             | 0 snRNA    | 15 | 79191182  | 79191278             |
| ENSG00000252062 | 0.499066092 |             | 0 snRNA    | 4  | 85807539  | 85807639             |
| ENSG00000252071 | 0.869158192 |             | 0 snoRNA   | 19 | 47451546  | 47451631             |
| ENSG00000252079 | 0           | 0.950786998 | snRNA      | 12 | 133411960 | 133412086            |
| ENSG00000252094 | 0.869158192 | 0.390640832 | rRNA       | 16 | 34980360  | 34980465             |
| ENSG00000252096 | 0           | 0.390640832 | snoRNA     | 20 | 4849630   | 4849764              |
| ENSG00000252097 | 0.499066092 | 0.390640832 | snRNA      | 18 | 74512620  | 74512730             |
| ENSG00000252101 | 0.499066092 |             | 0 snRNA    | 16 | 75320610  | 75320696             |
| ENSG00000252102 | 0           | 0.697730409 | snoRNA     | 7  | 64791632  | 64791729             |
| ENSG00000252105 | 0.499066092 | 0.390640832 | snRNA      | 1  | 149286177 | 149286322            |
| ENSG00000252114 | 0.499066092 |             | 0 snoRNA   | 14 | 23486367  | 23486590             |
| ENSG00000252124 | 0.499066092 | 0.697730409 | miRNA      | 22 | 40924061  | 40924137             |
| ENSG00000252126 | 0.869158192 |             | 0 snRNA    | 7  | 65809291  | 65809401             |
| ENSG00000252128 | 0           | 0.390640832 | snoRNA     | 13 | 21714025  | 21714096             |
| ENSG00000252131 | 0.499066092 |             | 0 miRNA    | 1  | 231124735 | 231124869            |
| ENSG00000252132 | 0           | 0.697730409 | snRNA      | 10 | 38332801  | 38332903             |
| ENSG00000252134 | 0           | 0.390640832 | misc_RNA   | 1  | 171783652 | 171783766            |
| ENSG00000252139 | 2.35979773  | 2.242360793 | snoRNA     | 18 | 47340731  | 47340813             |
| ENSG00000252147 | 0           | 0.390640832 | misc_RNA   | X  | 118590521 | 118590621            |
| ENSG00000252150 | 1.799000381 | 1.353254395 | miRNA      | 4  | 461317    | 461425               |
| ENSG00000252153 | 0.869158192 |             | 0 miRNA    | 9  | 97572244  | 97572339 MIR2278     |
| ENSG00000252157 | 0           | 0.390640832 | snRNA      | 4  | 184574725 | 184574829            |
| ENSG00000252172 | 0           | 0.697730409 | snRNA      | 3  | 149635129 | 149635236            |
| ENSG00000252174 | 0.499066092 |             | 0 snRNA    | 3  | 195799690 | 195799751            |
| ENSG00000252182 | 0           | 1.16600992  | rRNA       | 16 | 34981403  | 34981511             |
| ENSG00000252192 | 0.499066092 | 0.697730409 | snoRNA     | 12 | 122976660 | 122976788            |
| ENSG00000252194 | 10.29293587 | 10.41855964 | miRNA      | 1  | 108113461 | 108113552            |
| ENSG00000252195 | 0.499066092 |             | 0 snRNA    | 3  | 196442094 | 196442148            |
| ENSG00000252197 | 12.45513333 | 12.50864623 | miRNA      | 8  | 70602344  | 70602417             |
| ENSG00000252198 | 0.499066092 |             | 0 misc_RNA | 14 | 58908562  | 58908710             |

|                 |             |             |          |    |           |                    |
|-----------------|-------------|-------------|----------|----|-----------|--------------------|
| ENSG00000252200 | 0           | 0.390640832 | snoRNA   | 19 | 45229248  | 45229322           |
| ENSG00000252201 | 0.499066092 | 0           | snRNA    | 1  | 44182138  | 44182227           |
| ENSG00000252202 | 0.499066092 | 0.390640832 | misc_RNA | 5  | 179274035 | 179274130          |
| ENSG00000252206 | 0.499066092 | 0.390640832 | snRNA    | 12 | 56746171  | 56746234 RNU7-40P  |
| ENSG00000252207 | 0.499066092 | 0           | rRNA     | 12 | 90120713  | 90120819           |
| ENSG00000252211 | 0.499066092 | 0           | rRNA     | 19 | 58874805  | 58874929           |
| ENSG00000252212 | 0           | 0.950786998 | snRNA    | 17 | 57206637  | 57206819           |
| ENSG00000252213 | 0.499066092 | 1.518964905 | snoRNA   | 5  | 138611869 | 138612009          |
| ENSG00000252225 | 0.499066092 | 0           | misc_RNA | 22 | 36836925  | 36837015           |
| ENSG00000252229 | 15.03262403 | 15.07384097 | miRNA    | 1  | 91852862  | 91852949           |
| ENSG00000252230 | 0           | 0.390640832 | snoRNA   | 19 | 35128601  | 35128686           |
| ENSG00000252234 | 0           | 0.390640832 | miRNA    | 18 | 14118593  | 14118701           |
| ENSG00000252239 | 0           | 0.390640832 | snRNA    | 2  | 39620663  | 39620759           |
| ENSG00000252245 | 0           | 0.390640832 | snRNA    | 3  | 139107119 | 139107206          |
| ENSG00000252248 | 4.821592551 | 5.150490275 | miRNA    | 7  | 68527371  | 68527457           |
| ENSG00000252253 | 0           | 1.16600992  | misc_RNA | 6  | 52955199  | 52955301           |
| ENSG00000252255 | 0.499066092 | 0           | snRNA    | 11 | 125519641 | 125519782          |
| ENSG00000252268 | 0           | 0.390640832 | rRNA     | 16 | 34986199  | 34986306           |
| ENSG00000252269 | 0.499066092 | 0           | snRNA    | 12 | 133571776 | 133571888          |
| ENSG00000252274 | 0.869158192 | 0.390640832 | snoRNA   | 17 | 70814975  | 70815111           |
| ENSG00000252282 | 0           | 0.390640832 | snRNA    | 1  | 245186317 | 245186420          |
| ENSG00000252297 | 0           | 0.390640832 | snRNA    | 8  | 124354654 | 124354759          |
| ENSG00000252309 | 0.499066092 | 0           | miRNA    | 6  | 84077425  | 84077510           |
| ENSG00000252311 | 1.407729925 | 1.518964905 | snRNA    | 16 | 85815381  | 85815505           |
| ENSG00000252318 | 12.10617925 | 12.17131979 | miRNA    | 2  | 133038647 | 133038738          |
| ENSG00000252327 | 0.499066092 | 0           | snRNA    | 11 | 47461557  | 47461617           |
| ENSG00000252328 | 0.499066092 | 0.697730409 | misc_RNA | 17 | 33424579  | 33424676           |
| ENSG00000252331 | 3.78787645  | 3.453019579 | miRNA    | 11 | 77597679  | 77597752           |
| ENSG00000252333 | 0           | 0.390640832 | snRNA    | 2  | 230802530 | 230802598          |
| ENSG00000252334 | 0           | 0.390640832 | snRNA    | 19 | 58995116  | 58995210           |
| ENSG00000252335 | 0.499066092 | 0.390640832 | snRNA    | 13 | 95671489  | 95671590 RNU6-62   |
| ENSG00000252349 | 0.499066092 | 0           | snoRNA   | 17 | 19565313  | 19565403           |
| ENSG00000252355 | 0.499066092 | 0.697730409 | misc_RNA | 11 | 43456682  | 43456947           |
| ENSG00000252361 | 0.869158192 | 0.697730409 | snRNA    | 11 | 62583438  | 62583539           |
| ENSG00000252367 | 0.869158192 | 1.667587519 | misc_RNA | 20 | 5094639   | 5094729            |
| ENSG00000252378 | 0.499066092 | 0.390640832 | miRNA    | 7  | 73985677  | 73985754           |
| ENSG00000252379 | 0.499066092 | 0.390640832 | snRNA    | 18 | 29249252  | 29249341           |
| ENSG00000252389 | 0           | 0.950786998 | rRNA     | 16 | 34982891  | 34983026           |
| ENSG00000252390 | 0           | 0.390640832 | snRNA    | 12 | 31747027  | 31747140 RNU5F-4P  |
| ENSG00000252408 | 0.869158192 | 0           | snoRNA   | 19 | 3521246   | 3521318            |
| ENSG00000252412 | 0.869158192 | 1.353254395 | misc_RNA | 22 | 37409266  | 37409360           |
| ENSG00000252414 | 0.499066092 | 0           | snRNA    | 2  | 64806026  | 64806131           |
| ENSG00000252416 | 0.499066092 | 0           | snRNA    | 10 | 43327895  | 43327998           |
| ENSG00000252419 | 2.57521082  | 3.183544561 | misc_RNA | 6  | 5045818   | 5046335            |
| ENSG00000252427 | 0           | 0.697730409 | snoRNA   | 11 | 46780316  | 46780423           |
| ENSG00000252438 | 0           | 0.390640832 | snoRNA   | 10 | 12457927  | 12457999           |
| ENSG00000252447 | 2.762599152 | 2.788380093 | snoRNA   | 11 | 47749098  | 47749189           |
| ENSG00000252456 | 0           | 0.390640832 | rRNA     | 17 | 3960050   | 3960170            |
| ENSG00000252464 | 0           | 1.16600992  | misc_RNA | 5  | 178046729 | 178046999          |
| ENSG00000252465 | 0.499066092 | 0.390640832 | misc_RNA | 2  | 161253340 | 161253479          |
| ENSG00000252469 | 0.499066092 | 0           | snRNA    | 14 | 104016682 | 104016743          |
| ENSG00000252473 | 0.499066092 | 0.390640832 | snoRNA   | 2  | 39510798  | 39510932           |
| ENSG00000252478 | 0.499066092 | 0.390640832 | snRNA    | 2  | 85600577  | 85600637           |
| ENSG00000252481 | 1.16343121  | 2.579085888 | snoRNA   | 14 | 95999692  | 95999666 SCARNA13  |
| ENSG00000252483 | 0.869158192 | 0.697730409 | snRNA    | 17 | 20797845  | 20797951           |
| ENSG00000252494 | 0           | 0.390640832 | snRNA    | 11 | 77844466  | 77844568           |
| ENSG00000252498 | 1.16343121  | 1.353254395 | snRNA    | 6  | 76353800  | 76353893           |
| ENSG00000252503 | 1.16343121  | 0.950786998 | snRNA    | 4  | 139976629 | 139976732          |
| ENSG00000252504 | 0           | 0.950786998 | miRNA    | 3  | 53243969  | 53244062           |
| ENSG00000252516 | 1.407729925 | 1.353254395 | rRNA     | 1  | 247367872 | 247367963 RN5S82   |
| ENSG00000252525 | 0           | 0.390640832 | snoRNA   | X  | 70660367  | 70660477           |
| ENSG00000252539 | 0           | 0.390640832 | rRNA     | 19 | 453134    | 453245             |
| ENSG00000252542 | 0.499066092 | 0.697730409 | snoRNA   | 9  | 136217702 | 136217767 SNORD36C |

|                 |             |             |          |    |           |           |          |
|-----------------|-------------|-------------|----------|----|-----------|-----------|----------|
| ENSG00000252543 | 0.499066092 | 0           | snoRNA   | 8  | 8916049   | 8916140   |          |
| ENSG00000252546 | 0           | 0.390640832 | rRNA     | 19 | 12180979  | 12181086  |          |
| ENSG00000252549 | 0.499066092 | 1.16600992  | snRNA    | 20 | 34235250  | 34235352  |          |
| ENSG00000252552 | 1.16343121  | 0           | snRNA    | 1  | 174965661 | 174965766 |          |
| ENSG00000252564 | 0.499066092 | 0.390640832 | rRNA     | 2  | 162266065 | 162266181 | RN5S108  |
| ENSG00000252569 | 0.869158192 | 0           | snRNA    | 16 | 53477140  | 53477244  |          |
| ENSG00000252577 | 0.499066092 | 0.697730409 | snoRNA   | 17 | 58308877  | 58309007  | SCARNA20 |
| ENSG00000252579 | 0           | 0.390640832 | snRNA    | 16 | 89599924  | 89599962  |          |
| ENSG00000252580 | 0           | 0.390640832 | snoRNA   | 9  | 26796171  | 26796302  |          |
| ENSG00000252581 | 1.16343121  | 0           | snRNA    | 3  | 149243418 | 149243513 |          |
| ENSG00000252584 | 0.499066092 | 0           | miRNA    | 12 | 32068570  | 32068641  |          |
| ENSG00000252585 | 0.869158192 | 0.390640832 | misc_RNA | 12 | 27905807  | 27905919  |          |
| ENSG00000252587 | 0           | 0.697730409 | rRNA     | 16 | 34989294  | 34989404  |          |
| ENSG00000252589 | 0.499066092 | 0           | miRNA    | 17 | 41522174  | 41522253  | MIR2117  |
| ENSG00000252602 | 0           | 0.697730409 | snoRNA   | 15 | 30935128  | 30935255  |          |
| ENSG00000252609 | 0.499066092 | 0.697730409 | snoRNA   | 6  | 157712343 | 157712431 |          |
| ENSG00000252611 | 0           | 0.390640832 | snRNA    | 10 | 116729219 | 116729327 |          |
| ENSG00000252614 | 0           | 0.950786998 | snRNA    | 15 | 102188409 | 102188515 |          |
| ENSG00000252615 | 0.499066092 | 0           | misc_RNA | 6  | 151699135 | 151699234 |          |
| ENSG00000252616 | 0           | 0.390640832 | miRNA    | 4  | 218004    | 218112    |          |
| ENSG00000252620 | 0.499066092 | 0.950786998 | snRNA    | 3  | 195249885 | 195250019 |          |
| ENSG00000252629 | 0.499066092 | 0           | miRNA    | 20 | 51679156  | 51679240  |          |
| ENSG00000252632 | 2.671945279 | 2.501982735 | miRNA    | 19 | 58378631  | 58378717  |          |
| ENSG00000252637 | 0.499066092 | 0           | rRNA     | 8  | 68011537  | 68011660  | RN5S268  |
| ENSG00000252641 | 0           | 0.390640832 | snRNA    | 3  | 133383779 | 133383878 |          |
| ENSG00000252643 | 0.499066092 | 0           | snRNA    | 7  | 102475052 | 102475155 |          |
| ENSG00000252645 | 3.744048221 | 3.608232228 | snRNA    | 15 | 90440808  | 90440869  |          |
| ENSG00000252647 | 0           | 0.390640832 | rRNA     | 16 | 34985945  | 34986055  |          |
| ENSG00000252648 | 0           | 0.390640832 | miRNA    | X  | 16316513  | 16316597  |          |
| ENSG00000252652 | 0.499066092 | 0.390640832 | misc_RNA | 11 | 43352811  | 43352906  |          |
| ENSG00000252656 | 0.499066092 | 0           | misc_RNA | 1  | 145044651 | 145044900 |          |
| ENSG00000252666 | 12.45141201 | 12.50378782 | miRNA    | 19 | 36066627  | 36066721  |          |
| ENSG00000252672 | 0           | 0.390640832 | snoRNA   | 7  | 116073268 | 116073354 |          |
| ENSG00000252673 | 0           | 0.390640832 | rRNA     | 16 | 34988926  | 34989059  |          |
| ENSG00000252677 | 0.499066092 | 0           | snoRNA   | 18 | 19291911  | 19292080  |          |
| ENSG00000252680 | 0.869158192 | 0.697730409 | rRNA     | 18 | 9844714   | 9844843   |          |
| ENSG00000252685 | 0           | 0.390640832 | snRNA    | 17 | 64634389  | 64634492  |          |
| ENSG00000252699 | 1.616589159 | 2.501982735 | snoRNA   | 17 | 37007777  | 37007912  |          |
| ENSG00000252700 | 0.499066092 | 0           | snRNA    | 3  | 33455642  | 33455703  |          |
| ENSG00000252702 | 0.499066092 | 0.390640832 | snRNA    | 4  | 184090501 | 184090570 |          |
| ENSG00000252707 | 0.499066092 | 0           | snRNA    | 17 | 11939813  | 11939954  |          |
| ENSG00000252712 | 0.499066092 | 0           | snoRNA   | 15 | 66639545  | 66639680  | SCARNA14 |
| ENSG00000252732 | 0           | 0.390640832 | misc_RNA | 11 | 73375560  | 73375642  |          |
| ENSG00000252733 | 0.499066092 | 0           | miRNA    | 3  | 189861445 | 189861532 |          |
| ENSG00000252743 | 3.077135474 | 2.788380093 | snRNA    | 6  | 31724728  | 31724830  |          |
| ENSG00000252747 | 0           | 0.390640832 | rRNA     | 12 | 88445478  | 88445555  |          |
| ENSG00000252750 | 0           | 0.390640832 | snRNA    | 1  | 113177341 | 113177406 | RNU7-70P |
| ENSG00000252759 | 1.407729925 | 1.353254395 | misc_RNA | 2  | 201727875 | 201727970 |          |
| ENSG00000252768 | 0           | 0.390640832 | snRNA    | 3  | 52585862  | 52585959  |          |
| ENSG00000252771 | 0           | 0.390640832 | snoRNA   | 21 | 43024746  | 43024843  |          |
| ENSG00000252774 | 0           | 0.390640832 | snoRNA   | 15 | 64634738  | 64634897  |          |
| ENSG00000252779 | 0.499066092 | 0.390640832 | snRNA    | 2  | 172713076 | 172713180 |          |
| ENSG00000252782 | 0.499066092 | 0.697730409 | snRNA    | 14 | 58759011  | 58759106  |          |
| ENSG00000252786 | 0.499066092 | 0           | snRNA    | 3  | 129538620 | 129538719 |          |
| ENSG00000252787 | 0           | 0.390640832 | snoRNA   | 3  | 52722898  | 52722977  |          |
| ENSG00000252791 | 0           | 0.390640832 | misc_RNA | 20 | 36681049  | 36681148  |          |
| ENSG00000252792 | 0.869158192 | 0           | snoRNA   | 14 | 68212084  | 68212191  |          |
| ENSG00000252803 | 0           | 0.697730409 | snRNA    | 1  | 43489220  | 43489308  |          |
| ENSG00000252808 | 1.616589159 | 1.16600992  | snoRNA   | 1  | 155895749 | 155895877 | SCARNA4  |
| ENSG00000252813 | 0           | 0.390640832 | miRNA    | 15 | 71767826  | 71767901  |          |
| ENSG00000252817 | 0.499066092 | 2.334191469 | miRNA    | 1  | 154226921 | 154226997 |          |
| ENSG00000252821 | 0.499066092 | 0           | snRNA    | 7  | 33041562  | 33041666  |          |
| ENSG00000252827 | 1.799000381 | 1.802319292 | misc_RNA | 12 | 96820978  | 96821264  |          |

|                 |             |             |                  |    |           |           |          |
|-----------------|-------------|-------------|------------------|----|-----------|-----------|----------|
| ENSG00000252835 | 0.499066092 | 1.16600992  | snoRNA           | 17 | 7809440   | 7809578   | SCARNA21 |
| ENSG00000252838 | 1.407729925 | 0.697730409 | misc_RNA         | 16 | 23424905  | 23425197  |          |
| ENSG00000252839 | 0           | 0.390640832 | snRNA            | 14 | 73713526  | 73713588  |          |
| ENSG00000252841 | 0           | 0.390640832 | miRNA            | 1  | 9338450   | 9338592   |          |
| ENSG00000252859 | 0.499066092 | 0           | snRNA            | 22 | 41564221  | 41564320  |          |
| ENSG00000252865 | 0.499066092 | 0           | snRNA            | 12 | 57904847  | 57904918  |          |
| ENSG00000252869 | 0           | 0.390640832 | miRNA            | 14 | 59866741  | 59866869  |          |
| ENSG00000252871 | 0.499066092 | 0.390640832 | snRNA            | 6  | 43509912  | 43509973  |          |
| ENSG00000252874 | 0.499066092 | 0.390640832 | misc_RNA         | 11 | 47841755  | 47841844  |          |
| ENSG00000252892 | 0           | 0.697730409 | snRNA            | 2  | 65221880  | 65221994  |          |
| ENSG00000252895 | 0           | 0.697730409 | misc_RNA         | 10 | 95806795  | 95806882  | RNY4P26  |
| ENSG00000252899 | 0.499066092 | 0.390640832 | snRNA            | 5  | 133997420 | 133997479 |          |
| ENSG00000252906 | 0           | 0.390640832 | snoRNA           | 1  | 175937534 | 175937676 | SCARNA3  |
| ENSG00000252908 | 0           | 0.697730409 | snRNA            | 5  | 17240720  | 17240824  |          |
| ENSG00000252910 | 0           | 0.390640832 | snRNA            | 8  | 98786206  | 98786261  |          |
| ENSG00000252912 | 0           | 0.390640832 | rRNA             | 17 | 34847043  | 34847166  |          |
| ENSG00000252914 | 0           | 0.390640832 | snRNA            | 3  | 136440236 | 136440337 |          |
| ENSG00000252915 | 0.499066092 | 0.390640832 | misc_RNA         | 21 | 40716463  | 40716554  |          |
| ENSG00000252916 | 0.499066092 | 0.950786998 | snRNA            | 2  | 201763743 | 201763844 |          |
| ENSG00000252921 | 0           | 0.390640832 | snoRNA           | 18 | 23879079  | 23879219  |          |
| ENSG00000252923 | 0           | 0.390640832 | snoRNA           | 2  | 197550872 | 197551054 |          |
| ENSG00000252926 | 2.10647801  | 3.493416095 | snRNA            | 10 | 30725515  | 30725576  |          |
| ENSG00000252929 | 0.499066092 | 0           | snRNA            | 7  | 6097131   | 6097235   |          |
| ENSG00000252933 | 1.799000381 | 1.518964905 | snRNA            | 19 | 1616491   | 1616594   |          |
| ENSG00000252947 | 0.499066092 | 0.697730409 | snoRNA           | 1  | 28160912  | 28161077  | SCARNA1  |
| ENSG00000252949 | 0           | 0.390640832 | miRNA            | 6  | 20422549  | 20422632  |          |
| ENSG00000252951 | 0.499066092 | 0.697730409 | rRNA             | 4  | 148666454 | 148666568 | RN5S165  |
| ENSG00000252965 | 1.407729925 | 0.950786998 | misc_RNA         | 3  | 125247088 | 125247193 |          |
| ENSG00000252967 | 1.16343121  | 1.518964905 | miRNA            | 7  | 68527589  | 68527662  |          |
| ENSG00000252970 | 0.499066092 | 0.390640832 | rRNA             | 4  | 39938373  | 39938475  | RN5S159  |
| ENSG00000252971 | 0           | 0.697730409 | snRNA            | 17 | 20193570  | 20193671  |          |
| ENSG00000252972 | 0           | 0.390640832 | rRNA             | 15 | 69659924  | 69660020  |          |
| ENSG00000252975 | 0.499066092 | 0           | misc_RNA         | 4  | 39711705  | 39711796  |          |
| ENSG00000252981 | 0           | 0.390640832 | snoRNA           | 2  | 170672789 | 170672888 |          |
| ENSG00000252992 | 0.499066092 | 0.697730409 | snoRNA           | 11 | 117134515 | 117134668 |          |
| ENSG00000252993 | 0           | 0.390640832 | snoRNA           | 10 | 93835999  | 93836122  |          |
| ENSG00000253007 | 0           | 0.697730409 | snoRNA           | 22 | 34100772  | 34100908  |          |
| ENSG00000253015 | 0.499066092 | 0           | misc_RNA         | 5  | 138668727 | 138669054 |          |
| ENSG00000253022 | 0.499066092 | 0           | snRNA            | 1  | 6600914   | 6601024   |          |
| ENSG00000253024 | 0.869158192 | 0.390640832 | snRNA            | 11 | 67162681  | 67162782  |          |
| ENSG00000253047 | 0.499066092 | 0           | snoRNA           | 1  | 150573015 | 150573135 |          |
| ENSG00000253051 | 0.869158192 | 0.950786998 | snoRNA           | 13 | 45910449  | 45910582  |          |
| ENSG00000253054 | 0.499066092 | 0           | snRNA            | 10 | 35424371  | 35424430  | RNU7-77P |
| ENSG00000253055 | 0           | 0.390640832 | rRNA             | 16 | 34984432  | 34984546  |          |
| ENSG00000253057 | 0           | 0.390640832 | misc_RNA         | 5  | 111055466 | 111055758 |          |
| ENSG00000253058 | 0           | 0.390640832 | rRNA             | 17 | 30290824  | 30290952  |          |
| ENSG00000253068 | 0.869158192 | 0           | snoRNA           | 10 | 103862019 | 103862089 |          |
| ENSG00000253075 | 0.499066092 | 0           | misc_RNA         | 14 | 100953881 | 100954124 |          |
| ENSG00000253079 | 0           | 0.390640832 | misc_RNA         | 9  | 129170320 | 129170689 | NRON     |
| ENSG00000253081 | 0           | 0.950786998 | snRNA            | 3  | 8406215   | 8406334   |          |
| ENSG00000253084 | 0.869158192 | 0           | snRNA            | 17 | 33420928  | 33420992  |          |
| ENSG00000253092 | 0           | 0.390640832 | snoRNA           | 3  | 183170355 | 183170552 |          |
| ENSG00000253093 | 0           | 0.697730409 | rRNA             | 5  | 16854103  | 16854223  | RN5S179  |
| ENSG00000253095 | 0           | 0.390640832 | snRNA            | 12 | 11315699  | 11315763  |          |
| ENSG00000253102 | 0.499066092 | 1.16600992  | antisense        | 17 | 48473799  | 48475249  |          |
| ENSG00000253105 | 0.499066092 | 0           | protein_coding   | 8  | 97384093  | 97399666  |          |
| ENSG00000253106 | 3.004694206 | 3.608232228 | antisense        | 8  | 125500751 | 125503884 |          |
| ENSG00000253112 | 0.499066092 | 0           | antisense        | 8  | 30454431  | 30455049  |          |
| ENSG00000253114 | 0.499066092 | 0.697730409 | pseudogene       | 8  | 55608958  | 55609678  |          |
| ENSG00000253119 | 0.499066092 | 0           | pseudogene       | 5  | 153717031 | 153718012 |          |
| ENSG00000253125 | 0.499066092 | 2.144285137 | processed_transc | 8  | 22547663  | 22656129  |          |
| ENSG00000253130 | 1.16343121  | 0.390640832 | lincRNA          | 8  | 8418901   | 8427198   |          |
| ENSG00000253133 | 0           | 1.518964905 | protein_coding   | 8  | 41391674  | 41435887  |          |

|                 |             |             |                |    |           |           |              |
|-----------------|-------------|-------------|----------------|----|-----------|-----------|--------------|
| ENSG00000253141 | 0           | 1.667587519 | lincRNA        | 5  | 172890503 | 172911587 |              |
| ENSG00000253153 | 0.499066092 | 0           | pseudogene     | 8  | 102574236 | 102574716 |              |
| ENSG00000253155 | 0.499066092 | 0           | pseudogene     | 5  | 156849447 | 156849881 |              |
| ENSG00000253159 | 7.46813618  | 7.213370937 | protein_coding | 5  | 140810185 | 140892546 | PCDHGA12     |
| ENSG00000253161 | 2.847891871 | 2.652276565 | protein_coding | 8  | 37278859  | 37411701  |              |
| ENSG00000253166 | 0           | 0.390640832 | pseudogene     | 8  | 152660    | 152897    |              |
| ENSG00000253167 | 1.616589159 | 2.039052734 | antisense      | 8  | 126052926 | 126057231 | KIAA0196-AS1 |
| ENSG00000253168 | 0.499066092 | 0.390640832 | antisense      | 8  | 17561497  | 17563696  |              |
| ENSG00000253172 | 0.499066092 | 0           | antisense      | 5  | 172571165 | 172572042 |              |
| ENSG00000253173 | 0.499066092 | 0           | pseudogene     | 8  | 71016028  | 71016414  |              |
| ENSG00000253174 | 0           | 0.950786998 | antisense      | 8  | 41397900  | 41402563  |              |
| ENSG00000253175 | 0           | 0.390640832 | pseudogene     | 8  | 95577264  | 95577943  |              |
| ENSG00000253180 | 0.499066092 | 1.16600992  | pseudogene     | 8  | 100015635 | 100016070 |              |
| ENSG00000253183 | 0           | 0.697730409 | pseudogene     | 7  | 139187199 | 139188558 |              |
| ENSG00000253187 | 1.16343121  | 0.697730409 | antisense      | 7  | 27208238  | 27211534  |              |
| ENSG00000253190 | 0           | 0.697730409 | protein_coding | 8  | 67024902  | 67027414  |              |
| ENSG00000253194 | 0           | 0.390640832 | antisense      | 6  | 119255950 | 119352706 |              |
| ENSG00000253196 | 0.499066092 | 0           | antisense      | 8  | 143844534 | 143847845 |              |
| ENSG00000253200 | 4.19837882  | 4.406904905 | protein_coding | 8  | 22471421  | 22474170  |              |
| ENSG00000253203 | 3.448790144 | 3.935919592 | pseudogene     | 5  | 68790040  | 69006341  | GUSBP3       |
| ENSG00000253204 | 0           | 0.697730409 | pseudogene     | 8  | 30778576  | 30778851  |              |
| ENSG00000253210 | 1.799000381 | 1.518964905 | antisense      | 8  | 142136143 | 142140060 |              |
| ENSG00000253213 | 0.499066092 | 1.667587519 | pseudogene     | 5  | 170678870 | 170679986 |              |
| ENSG00000253214 | 0.869158192 | 0.697730409 | lincRNA        | 8  | 82066514  | 82076834  |              |
| ENSG00000253218 | 0.499066092 | 0.697730409 | pseudogene     | 5  | 171681422 | 171682443 | KLF3P1       |
| ENSG00000253227 | 0.869158192 | 0.697730409 | lincRNA        | 8  | 125283924 | 125289825 |              |
| ENSG00000253245 | 0           | 0.390640832 | pseudogene     | 11 | 103278169 | 103279104 | MTND1P36     |
| ENSG00000253250 | 0           | 0.697730409 | protein_coding | 8  | 91970865  | 91997485  |              |
| ENSG00000253251 | 3.448790144 | 4.202780776 | protein_coding | 5  | 64920592  | 64926718  |              |
| ENSG00000253257 | 0.499066092 | 0           | pseudogene     | 8  | 13210910  | 13211039  | MTND4P7      |
| ENSG00000253258 | 0.869158192 | 1.353254395 | protein_coding | 8  | 124193878 | 124195028 |              |
| ENSG00000253263 | 0.499066092 | 0.950786998 | sense_intronic | 8  | 103904104 | 103905836 |              |
| ENSG00000253270 | 1.616589159 | 0.390640832 | lincRNA        | 8  | 19536083  | 19546445  |              |
| ENSG00000253273 | 0           | 0.390640832 | pseudogene     | 8  | 74743378  | 74744182  |              |
| ENSG00000253276 | 7.562629889 | 7.093659051 | protein_coding | 7  | 106297211 | 106301442 | CCDC71L      |
| ENSG00000253284 | 0.869158192 | 1.518964905 | sense_intronic | 12 | 19300008  | 19307593  |              |
| ENSG00000253286 | 0.869158192 | 0.390640832 | antisense      | 8  | 124626465 | 124670810 |              |
| ENSG00000253293 | 5.239686603 | 5.361622823 | protein_coding | 7  | 27210210  | 27219880  | HOXA10       |
| ENSG00000253295 | 1.16343121  | 0           | antisense      | 5  | 172185229 | 172189559 |              |
| ENSG00000253298 | 0           | 0.390640832 | lincRNA        | 5  | 158875564 | 158893284 |              |
| ENSG00000253299 | 0.499066092 | 0           | pseudogene     | 8  | 101177454 | 101177706 |              |
| ENSG00000253302 | 0.499066092 | 0.390640832 | lincRNA        | 8  | 74332239  | 74353761  |              |
| ENSG00000253304 | 6.305850085 | 6.349483465 | protein_coding | 1  | 29445940  | 29450447  | TMEM200B     |
| ENSG00000253305 | 5.124761037 | 4.640685763 | protein_coding | 5  | 140787770 | 140892546 | PCDHGB6      |
| ENSG00000253307 | 0.499066092 | 0           | antisense      | 8  | 142262385 | 142263391 |              |
| ENSG00000253308 | 0.499066092 | 0           | protein_coding | 7  | 27278862  | 27280847  |              |
| ENSG00000253309 | 3.652182994 | 3.183544561 | protein_coding | 13 | 51909909  | 51938871  | SERPINE3     |
| ENSG00000253313 | 2.928422289 | 0.390640832 | protein_coding | 1  | 43747554  | 43751288  | C1orf210     |
| ENSG00000253315 | 0.869158192 | 0.390640832 | lincRNA        | 5  | 158654723 | 158672135 |              |
| ENSG00000253317 | 0           | 0.390640832 | lincRNA        | 8  | 73108569  | 73114504  |              |
| ENSG00000253320 | 3.274897671 | 3.714580548 | protein_coding | 8  | 103876528 | 103990104 |              |
| ENSG00000253326 | 0.869158192 | 1.353254395 | pseudogene     | 1  | 243218160 | 243220496 |              |
| ENSG00000253327 | 0.869158192 | 0.950786998 | protein_coding | 8  | 117886663 | 117889123 | RAD21-AS1    |
| ENSG00000253328 | 0.499066092 | 0.390640832 | pseudogene     | 8  | 103254268 | 103254847 |              |
| ENSG00000253330 | 2.671945279 | 3.027231696 | pseudogene     | 8  | 48423596  | 48424703  |              |
| ENSG00000253335 | 0.869158192 | 0.390640832 | antisense      | 8  | 18846789  | 18858462  |              |
| ENSG00000253341 | 2.471521042 | 2.721932731 | pseudogene     | 8  | 75515479  | 75516479  |              |
| ENSG00000253347 | 1.16343121  | 0.697730409 | antisense      | 17 | 45486688  | 45500892  |              |
| ENSG00000253351 | 0           | 0.390640832 | lincRNA        | 8  | 96219235  | 96228602  |              |
| ENSG00000253352 | 11.53229244 | 11.72482311 | lincRNA        | 22 | 31366663  | 31374831  | TUG1         |
| ENSG00000253368 | 6.835971536 | 6.619638408 | protein_coding | 1  | 27320198  | 27327147  | TRNP1        |
| ENSG00000253372 | 1.616589159 | 1.16600992  | sense_intronic | 8  | 123819985 | 123828756 |              |
| ENSG00000253384 | 0.499066092 | 0.390640832 | pseudogene     | 8  | 17946078  | 17947196  |              |

|                 |             |             |                    |    |           |                      |
|-----------------|-------------|-------------|--------------------|----|-----------|----------------------|
| ENSG00000253385 | 0.869158192 | 0.697730409 | lincRNA            | 8  | 103866683 | 103868303            |
| ENSG00000253390 | 1.960915222 | 0.950786998 | lincRNA            | 8  | 23316114  | 23342484             |
| ENSG00000253392 | 1.960915222 | 2.788380093 | antisense          | 19 | 2915144   | 2917105              |
| ENSG00000253395 | 0.869158192 | 0.390640832 | lincRNA            | 8  | 102134373 | 102138386            |
| ENSG00000253399 | 0.499066092 |             | 0 sense_intronic   | 4  | 1352267   | 1353249              |
| ENSG00000253404 | 0.499066092 | 0.950786998 | antisense          | 5  | 138080123 | 138088998            |
| ENSG00000253405 | 0.499066092 | 0.390640832 | antisense          | 7  | 27281048  | 27286848             |
| ENSG00000253406 | 2.238690726 | 1.518964905 | antisense          | 5  | 148596086 | 148656368            |
| ENSG00000253408 | 0           | 1.16600992  | antisense          | 8  | 42091193  | 42128715             |
| ENSG00000253410 | 0.869158192 |             | 0 pseudogene       | 8  | 124205115 | 124205172            |
| ENSG00000253414 | 2.35979773  | 2.144285137 | protein_coding     | 8  | 37373968  | 37374539             |
| ENSG00000253416 | 0           | 0.390640832 | lincRNA            | 8  | 77816827  | 77825635             |
| ENSG00000253426 | 0           | 0.950786998 | protein_coding     | 8  | 9009252   | 9025646              |
| ENSG00000253430 | 0.499066092 |             | 0 sense_intronic   | 8  | 26280109  | 26281445             |
| ENSG00000253434 | 0.499066092 |             | 0 processed_transc | 8  | 112388868 | 112555202            |
| ENSG00000253439 | 0           | 0.390640832 | pseudogene         | 5  | 172512345 | 172513213            |
| ENSG00000253454 | 0.499066092 | 0.697730409 | pseudogene         | 8  | 105578314 | 105578657            |
| ENSG00000253457 | 0.499066092 | 0.390640832 | protein_coding     | 8  | 30496117  | 30503581             |
| ENSG00000253459 | 1.16343121  | 1.925536307 | protein_coding     | 14 | 50064193  | 50065882             |
| ENSG00000253463 | 0.499066092 | 0.697730409 | pseudogene         | 8  | 124135346 | 124135922 HMGB1P19   |
| ENSG00000253468 | 0           | 0.390640832 | pseudogene         | 8  | 99425110  | 99426012             |
| ENSG00000253476 | 1.16343121  | 1.518964905 | lincRNA            | 8  | 25283037  | 25284096             |
| ENSG00000253481 | 0           | 0.390640832 | IG_V_pseudogen     | 22 | 17414465  | 17414716 IGKV1OR22-1 |
| ENSG00000253483 | 1.407729925 | 1.667587519 | pseudogene         | 8  | 23340529  | 23341047             |
| ENSG00000253485 | 4.026095388 | 3.570966319 | protein_coding     | 5  | 140743898 | 140892546 PCDHGA5    |
| ENSG00000253488 | 0           | 0.390640832 | pseudogene         | 8  | 23492389  | 23493020             |
| ENSG00000253500 | 0           | 2.144285137 | processed_transc   | 8  | 88554214  | 88767946             |
| ENSG00000253502 | 0.499066092 |             | 0 pseudogene       | 8  | 48105625  | 48105970 ATP6V1G1P2  |
| ENSG00000253516 | 0.499066092 | 0.950786998 | pseudogene         | 8  | 81724377  | 81724816 HMGB1P41    |
| ENSG00000253517 | 0           | 0.390640832 | pseudogene         | 8  | 63767627  | 63769693             |
| ENSG00000253518 | 5.346128795 | 5.855704078 | antisense          | 5  | 55240484  | 55240957             |
| ENSG00000253522 | 6.372135143 | 7.88892877  | lincRNA            | 5  | 159895275 | 159914433            |
| ENSG00000253526 | 0           | 0.390640832 | lincRNA            | 8  | 106838798 | 106846266            |
| ENSG00000253528 | 0.499066092 | 0.390640832 | pseudogene         | 8  | 95986799  | 95987081             |
| ENSG00000253530 | 0.499066092 |             | 0 lincRNA          | 8  | 127530943 | 127534596            |
| ENSG00000253532 | 0           | 0.390640832 | sense_intronic     | 8  | 100131580 | 100132809            |
| ENSG00000253536 | 0.499066092 |             | 0 pseudogene       | 5  | 70771588  | 70772143             |
| ENSG00000253537 | 4.517578978 | 4.17820932  | protein_coding     | 5  | 140762467 | 140892546 PCDHGA7    |
| ENSG00000253540 | 5.286269488 | 5.200150955 | pseudogene         | 3  | 129817935 | 129830315 FAM86HP    |
| ENSG00000253541 | 0.869158192 | 0.390640832 | pseudogene         | 8  | 57389385  | 57390546 SEPT10P1    |
| ENSG00000253543 | 0.499066092 | 0.697730409 | pseudogene         | 8  | 127594876 | 127595251            |
| ENSG00000253548 | 0.869158192 | 0.390640832 | protein_coding     | 3  | 191178952 | 191179245 PYDC2      |
| ENSG00000253552 | 0.499066092 | 0.390640832 | antisense          | 7  | 27147396  | 27173921             |
| ENSG00000253558 | 0.499066092 | 0.390640832 | pseudogene         | 5  | 77337703  | 77339962             |
| ENSG00000253559 | 0           | 0.390640832 | antisense          | 2  | 190627430 | 190630282            |
| ENSG00000253563 | 0           | 0.390640832 | antisense          | 14 | 36988483  | 36992221 NKX2-1-AS1  |
| ENSG00000253567 | 0.499066092 |             | 0 antisense        | 8  | 28304781  | 28313419             |
| ENSG00000253570 | 0.499066092 | 0.697730409 | pseudogene         | 8  | 38458179  | 38458718 RNF5P1      |
| ENSG00000253572 | 0.499066092 |             | 0 lincRNA          | 5  | 77238589  | 77242248             |
| ENSG00000253579 | 0.499066092 |             | 0 pseudogene       | 8  | 30989055  | 30989318             |
| ENSG00000253582 | 0           | 0.390640832 | antisense          | 8  | 107532702 | 107669776            |
| ENSG00000253584 | 0.499066092 |             | 0 lincRNA          | 5  | 104253193 | 104582065            |
| ENSG00000253585 | 0.499066092 |             | 0 lincRNA          | 8  | 95109992  | 95116550             |
| ENSG00000253591 | 0           | 0.390640832 | antisense          | 5  | 170066162 | 170108441            |
| ENSG00000253598 | 2.847891871 | 2.912743273 | protein_coding     | 8  | 82605842  | 82608409 SLC10A5     |
| ENSG00000253603 | 0.499066092 | 0.950786998 | antisense          | 8  | 56987151  | 56987833             |
| ENSG00000253605 | 0.499066092 | 1.16600992  | pseudogene         | 8  | 142469175 | 142470131            |
| ENSG00000253606 | 0.499066092 |             | 0 pseudogene       | 8  | 43125341  | 43127105 AFG3L2P1    |
| ENSG00000253607 | 0.499066092 | 0.950786998 | antisense          | 8  | 124014800 | 124042991            |
| ENSG00000253616 | 3.78787645  | 4.127774132 | antisense          | 8  | 22928890  | 22932001             |
| ENSG00000253618 | 0.499066092 | 0.697730409 | antisense          | 5  | 148727679 | 148737205            |
| ENSG00000253626 | 5.869093502 | 6.016808232 | protein_coding     | 10 | 81272357  | 81276188 EIF5AL1     |
| ENSG00000253630 | 0           | 0.390640832 | pseudogene         | 5  | 157174512 | 157174715            |



|                 |             |             |                  |    |           |                    |
|-----------------|-------------|-------------|------------------|----|-----------|--------------------|
| ENSG00000253632 | 0           | 0.390640832 | lincRNA          | 8  | 29384829  | 29387840           |
| ENSG00000253636 | 3.78787645  | 2.912743273 | antisense        | 8  | 73964413  | 73975296           |
| ENSG00000253641 | 0.499066092 | 1.518964905 | lincRNA          | 8  | 10332075  | 10339484           |
| ENSG00000253642 | 0.499066092 | 0           | lincRNA          | 8  | 33462374  | 33896526           |
| ENSG00000253649 | 0           | 1.353254395 | antisense        | 8  | 10340388  | 10405095           |
| ENSG00000253660 | 0           | 0.390640832 | antisense        | 5  | 167364722 | 167380474          |
| ENSG00000253667 | 2.847891871 | 2.420525079 | pseudogene       | 8  | 54883791  | 54886758           |
| ENSG00000253669 | 3.335220907 | 3.411459265 | lincRNA          | 8  | 103817745 | 103822199          |
| ENSG00000253671 | 2.238690726 | 3.748356452 | processed_transc | 8  | 17666450  | 17678377           |
| ENSG00000253676 | 3.448790144 | 3.714580548 | pseudogene       | 8  | 107709655 | 107710241 TAGLN2P1 |
| ENSG00000253677 | 0.869158192 | 0           | pseudogene       | 8  | 82167105  | 82167464 UBE2HP1   |
| ENSG00000253678 | 1.16343121  | 0           | lincRNA          | 8  | 10335001  | 10336885           |
| ENSG00000253683 | 0.869158192 | 1.16600992  | pseudogene       | 5  | 172083525 | 172083716          |
| ENSG00000253686 | 0           | 0.390640832 | lincRNA          | 5  | 173134617 | 173173214          |
| ENSG00000253687 | 0.869158192 | 0.950786998 | antisense        | 5  | 160040880 | 160066190          |
| ENSG00000253698 | 0           | 0.390640832 | antisense        | 5  | 177777868 | 177779251          |
| ENSG00000253704 | 0           | 0.950786998 | processed_transc | 8  | 95565950  | 95581973           |
| ENSG00000253710 | 5.090170488 | 4.744751758 | protein_coding   | 13 | 52586534  | 52603800 ALG11     |
| ENSG00000253715 | 0.499066092 | 0           | antisense        | 8  | 143866790 | 143893536          |
| ENSG00000253716 | 4.261916566 | 4.841813558 | antisense        | 8  | 144362331 | 144363860          |
| ENSG00000253718 | 0.869158192 | 1.518964905 | processed_transc | 5  | 178107232 | 178366360          |
| ENSG00000253719 | 9.111570361 | 9.264857299 | protein_coding   | 12 | 74931551  | 74935223 ATXN7L3B  |
| ENSG00000253720 | 0.499066092 | 0.697730409 | lincRNA          | 8  | 130952102 | 130961640          |
| ENSG00000253725 | 2.57521082  | 1.518964905 | pseudogene       | 5  | 178267098 | 178268135          |
| ENSG00000253729 | 12.21427813 | 12.28850031 | protein_coding   | 8  | 48685669  | 48872743 PRKDC     |
| ENSG00000253730 | 0.869158192 | 0.950786998 | antisense        | 17 | 48235694  | 48238637           |
| ENSG00000253731 | 5.40360309  | 5.03207928  | protein_coding   | 5  | 140753651 | 140892546 PCDHGA6  |
| ENSG00000253738 | 7.311793575 | 6.99862477  | antisense        | 8  | 92072137  | 92082417           |
| ENSG00000253741 | 1.799000381 | 3.027231696 | antisense        | 8  | 143783670 | 143808391          |
| ENSG00000253744 | 0.499066092 | 0.390640832 | antisense        | 5  | 65439984  | 65440623           |
| ENSG00000253746 | 1.799000381 | 1.16600992  | lincRNA          | 8  | 37262957  | 37264242           |
| ENSG00000253754 | 0.499066092 | 0.950786998 | antisense        | 8  | 109238429 | 109239773          |
| ENSG00000253760 | 0           | 0.390640832 | pseudogene       | 8  | 81480285  | 81480741           |
| ENSG00000253766 | 0           | 0.390640832 | antisense        | 5  | 21616371  | 21779631           |
| ENSG00000253767 | 5.286269488 | 4.810179682 | protein_coding   | 5  | 140772381 | 140892546 PCDHGA8  |
| ENSG00000253768 | 0           | 0.950786998 | lincRNA          | 5  | 172989481 | 173000202          |
| ENSG00000253773 | 0           | 1.16600992  | processed_transc | 8  | 96216684  | 96822364           |
| ENSG00000253785 | 1.16343121  | 0.950786998 | pseudogene       | 5  | 172402514 | 172403377          |
| ENSG00000253797 | 6.283060568 | 6.097646709 | protein_coding   | 13 | 52598827  | 52607701 UTP14C    |
| ENSG00000253802 | 0.499066092 | 1.16600992  | lincRNA          | 8  | 40156260  | 40200921           |
| ENSG00000253819 | 3.393122761 | 2.912743273 | protein_coding   | 8  | 123682624 | 123706345          |
| ENSG00000253825 | 0           | 0.390640832 | lincRNA          | 4  | 120956188 | 120961770          |
| ENSG00000253829 | 0           | 0.950786998 | antisense        | 8  | 38702384  | 38703957           |
| ENSG00000253830 | 0.499066092 | 1.16600992  | processed_transc | 5  | 149516867 | 149535435          |
| ENSG00000253832 | 0.499066092 | 0           | lincRNA          | 8  | 24849516  | 24867292           |
| ENSG00000253837 | 3.393122761 | 4.021284656 | processed_transc | 8  | 23193684  | 23223638           |
| ENSG00000253844 | 0.499066092 | 0           | lincRNA          | 8  | 52874018  | 52935534           |
| ENSG00000253846 | 4.942865586 | 4.101879561 | protein_coding   | 5  | 140792743 | 140892546 PCDHGA10 |
| ENSG00000253848 | 0.499066092 | 0.697730409 | antisense        | 8  | 94753421  | 94756762           |
| ENSG00000253854 | 3.554067925 | 3.183544561 | antisense        | 8  | 94731802  | 94733395           |
| ENSG00000253858 | 0           | 0.697730409 | antisense        | 5  | 169910810 | 169913411          |
| ENSG00000253869 | 0           | 0.390640832 | pseudogene       | 5  | 178349065 | 178349717          |
| ENSG00000253873 | 3.989024711 | 3.493416095 | protein_coding   | 5  | 140800762 | 140891835 PCDHGA11 |
| ENSG00000253875 | 0.499066092 | 0.390640832 | antisense        | 8  | 27590855  | 27613943           |
| ENSG00000253878 | 1.16343121  | 0.390640832 | sense_intronic   | 8  | 95962265  | 95963624           |
| ENSG00000253879 | 0           | 0.390640832 | lincRNA          | 8  | 60513937  | 60526334           |
| ENSG00000253882 | 5.417620896 | 6.371325053 | pseudogene       | 7  | 143339348 | 143534026          |
| ENSG00000253886 | 0.499066092 | 0.390640832 | pseudogene       | 5  | 153873136 | 153874303          |
| ENSG00000253893 | 1.616589159 | 2.242360793 | antisense        | 8  | 7992174   | 8085385            |
| ENSG00000253899 | 0.499066092 | 0.950786998 | pseudogene       | 8  | 26921513  | 26922795           |
| ENSG00000253908 | 1.799000381 | 0.950786998 | pseudogene       | 5  | 179684680 | 179685366          |
| ENSG00000253910 | 5.741167503 | 5.816437314 | protein_coding   | 5  | 140739703 | 140892546 PCDHGB2  |
| ENSG00000253917 | 0.499066092 | 0           | pseudogene       | 4  | 3916910   | 3957148            |

|                 |             |             |                  |    |           |                     |
|-----------------|-------------|-------------|------------------|----|-----------|---------------------|
| ENSG00000253921 | 0.499066092 | 1.518964905 | antisense        | 5  | 151133553 | 151146808           |
| ENSG00000253923 | 0           | 0.390640832 | pseudogene       | 8  | 103430207 | 103431181           |
| ENSG00000253930 | 3.335220907 | 2.788380093 | antisense        | 8  | 23046792  | 23048188            |
| ENSG00000253931 | 1.799000381 | 2.039052734 | antisense        | 8  | 144494919 | 144499224           |
| ENSG00000253932 | 0           | 0.697730409 | antisense        | 8  | 13196083  | 13200263            |
| ENSG00000253944 | 0.499066092 | 1.353254395 | antisense        | 8  | 17658854  | 17718578            |
| ENSG00000253948 | 3.502389126 | 3.679994897 | processed_transc | 8  | 100008991 | 100025272           |
| ENSG00000253950 | 3.004694206 | 2.652276565 | processed_transc | 19 | 35500023  | 35501430            |
| ENSG00000253952 | 0           | 0.390640832 | pseudogene       | 8  | 77925987  | 77926264 HIGD1AP18  |
| ENSG00000253953 | 7.136425764 | 7.315480906 | protein_coding   | 5  | 140767452 | 140892546 PCDHGB4   |
| ENSG00000253954 | 4.19837882  | 4.42790041  | pseudogene       | 15 | 93254977  | 93256105 HMGN1P38   |
| ENSG00000253955 | 1.16343121  | 1.802319292 | antisense        | 5  | 173006646 | 173012071           |
| ENSG00000253958 | 3.274897671 | 3.679994897 | protein_coding   | 8  | 8559448   | 8561616 CLDN23      |
| ENSG00000253961 | 0.499066092 | 0.390640832 | antisense        | 8  | 31024594  | 31034683            |
| ENSG00000253965 | 0           | 0.390640832 | antisense        | 5  | 139728069 | 139737379           |
| ENSG00000253966 | 2.847891871 | 2.334191469 | pseudogene       | 5  | 170323933 | 170331465           |
| ENSG00000253968 | 0           | 0.697730409 | lincRNA          | 5  | 172841038 | 172878168           |
| ENSG00000253971 | 0.869158192 | 0.390640832 | pseudogene       | 8  | 144077267 | 144077899           |
| ENSG00000253972 | 0.869158192 | 0           | lincRNA          | 8  | 120227351 | 120259088           |
| ENSG00000253978 | 0.499066092 | 1.16600992  | antisense        | 5  | 167656588 | 167659362           |
| ENSG00000253981 | 3.652182994 | 2.652276565 | pseudogene       | 8  | 8093525   | 8102189             |
| ENSG00000253982 | 5.018397273 | 5.42565083  | antisense        | 8  | 1710156   | 1712668             |
| ENSG00000253986 | 1.16343121  | 0.950786998 | lincRNA          | 8  | 23350522  | 23351711            |
| ENSG00000253991 | 0.499066092 | 0.390640832 | pseudogene       | 8  | 102540951 | 102541797           |
| ENSG00000254003 | 0.499066092 | 0           | antisense        | 7  | 87845975  | 87848541            |
| ENSG00000254004 | 7.494827594 | 7.541804862 | protein_coding   | 19 | 37001597  | 37019562 ZNF260     |
| ENSG00000254006 | 0.499066092 | 0           | lincRNA          | 8  | 65713793  | 65730130            |
| ENSG00000254008 | 1.16343121  | 0           | antisense        | 8  | 143279717 | 143290364 LINC00051 |
| ENSG00000254012 | 0.499066092 | 0.390640832 | pseudogene       | 5  | 170793303 | 170793615           |
| ENSG00000254013 | 0.499066092 | 0           | pseudogene       | 8  | 29885229  | 29886416 MAP2K1P1   |
| ENSG00000254016 | 1.407729925 | 0.950786998 | pseudogene       | 12 | 8380330   | 8384360 ALG1L2      |
| ENSG00000254017 | 0           | 0.390640832 | IG_C_pseudogen   | 9  | 5113549   | 5114804 IGHEP2      |
| ENSG00000254018 | 0           | 0.390640832 | protein_coding   | 8  | 122896963 | 122916512           |
| ENSG00000254023 | 0.499066092 | 1.353254395 | pseudogene       | 8  | 76288944  | 76289249            |
| ENSG00000254025 | 0.499066092 | 0.697730409 | pseudogene       | 8  | 52348162  | 52349069            |
| ENSG00000254027 | 2.10647801  | 2.242360793 | antisense        | 8  | 82192106  | 82193681            |
| ENSG00000254028 | 0           | 0.390640832 | lincRNA          | 8  | 135844990 | 135846725           |
| ENSG00000254034 | 0           | 1.16600992  | antisense        | 8  | 28655659  | 28656986            |
| ENSG00000254035 | 0.869158192 | 0.950786998 | antisense        | 5  | 178396391 | 178417117           |
| ENSG00000254038 | 0           | 0.697730409 | protein_coding   | 8  | 36924959  | 36926936            |
| ENSG00000254054 | 0.499066092 | 0           | lincRNA          | 8  | 17763265  | 17773919            |
| ENSG00000254057 | 1.407729925 | 1.925536307 | lincRNA          | 8  | 94846682  | 94858971            |
| ENSG00000254061 | 0.499066092 | 0.390640832 | pseudogene       | 8  | 33293786  | 33294218            |
| ENSG00000254064 | 3.448790144 | 3.32456471  | antisense        | 8  | 22112089  | 22132675            |
| ENSG00000254065 | 0.499066092 | 0           | pseudogene       | 8  | 48504709  | 48505171            |
| ENSG00000254071 | 0           | 0.950786998 | antisense        | 8  | 98703444  | 98711664            |
| ENSG00000254087 | 9.877806407 | 9.777485815 | protein_coding   | 8  | 56792372  | 56923939 LYN        |
| ENSG00000254088 | 0.499066092 | 1.518964905 | pseudogene       | 8  | 87515820  | 87517290            |
| ENSG00000254090 | 0           | 0.697730409 | pseudogene       | 8  | 32872779  | 32874561 MTND2P32   |
| ENSG00000254092 | 0           | 0.697730409 | lincRNA          | 8  | 20810156  | 20831388            |
| ENSG00000254093 | 6.163378456 | 6.408769788 | protein_coding   | 8  | 10622473  | 10697394 PINX1      |
| ENSG00000254094 | 0           | 0.950786998 | sense_intronic   | 4  | 1350369   | 1351863             |
| ENSG00000254099 | 0.499066092 | 0.390640832 | antisense        | 5  | 141350202 | 141362252           |
| ENSG00000254104 | 0           | 0.390640832 | pseudogene       | 8  | 214315    | 214672              |
| ENSG00000254105 | 0.499066092 | 0           | pseudogene       | 8  | 74563524  | 74563837 VENTXP6    |
| ENSG00000254109 | 1.799000381 | 2.652276565 | antisense        | 8  | 30239635  | 30242917            |
| ENSG00000254122 | 4.942865586 | 4.94736961  | protein_coding   | 5  | 140797427 | 140892546 PCDHGB7   |
| ENSG00000254130 | 1.960915222 | 0           | lincRNA          | 5  | 166332227 | 166353375           |
| ENSG00000254131 | 0           | 0.390640832 | pseudogene       | 8  | 42342118  | 42342537            |
| ENSG00000254132 | 0.499066092 | 0.390640832 | pseudogene       | 5  | 93904634  | 93905175 MTND6P3    |
| ENSG00000254142 | 2.57521082  | 3.32456471  | processed_transc | 8  | 55466921  | 55474487            |
| ENSG00000254143 | 0           | 0.390640832 | lincRNA          | 8  | 40018977  | 40030131            |
| ENSG00000254151 | 0           | 0.390640832 | pseudogene       | 8  | 82529455  | 82530795 NIPA2P4    |

|                 |             |             |                  |    |           |                    |
|-----------------|-------------|-------------|------------------|----|-----------|--------------------|
| ENSG00000254153 | 0.499066092 | 0           | lincRNA          | 8  | 8314419   | 8318847            |
| ENSG00000254154 | 0.499066092 | 0.697730409 | processed_transc | 1  | 177897923 | 178007142 SEC16B   |
| ENSG00000254162 | 3.652182994 | 2.971122874 | lincRNA          | 8  | 81447241  | 81451370           |
| ENSG00000254165 | 2.847891871 | 2.652276565 | antisense        | 8  | 42392672  | 42393447           |
| ENSG00000254170 | 0           | 1.16600992  | pseudogene       | 5  | 78004557  | 78011905           |
| ENSG00000254177 | 0.499066092 | 0.390640832 | lincRNA          | 8  | 81970758  | 81979979           |
| ENSG00000254180 | 0.499066092 | 0.390640832 | processed_transc | 8  | 91546839  | 91632298           |
| ENSG00000254184 | 2.762599152 | 2.912743273 | pseudogene       | 7  | 72023729  | 72298765 TYW1B     |
| ENSG00000254187 | 0.499066092 | 0           | antisense        | 5  | 167080233 | 167087486          |
| ENSG00000254197 | 0           | 0.390640832 | lincRNA          | 8  | 142288327 | 142302961          |
| ENSG00000254198 | 4.800350936 | 5.125003832 | pseudogene       | 8  | 42981138  | 42981540           |
| ENSG00000254200 | 0.499066092 | 0           | pseudogene       | 5  | 172652839 | 172653426 RPL7AP33 |
| ENSG00000254206 | 3.077135474 | 2.912743273 | protein_coding   | 16 | 29392675  | 29415350           |
| ENSG00000254207 | 0           | 0.390640832 | sense_intronic   | 8  | 675188    | 675877             |
| ENSG00000254208 | 0.869158192 | 0           | antisense        | 8  | 86089757  | 86090385           |
| ENSG00000254221 | 5.239686603 | 4.976162367 | protein_coding   | 5  | 140729828 | 140892546 PCDHGB1  |
| ENSG00000254224 | 0           | 0.390640832 | antisense        | 8  | 97247655  | 97250262           |
| ENSG00000254226 | 0.499066092 | 0.390640832 | lincRNA          | 5  | 151329132 | 151650009          |
| ENSG00000254231 | 0.869158192 | 0.697730409 | processed_transc | 8  | 87345503  | 87355543           |
| ENSG00000254233 | 1.799000381 | 3.845183986 | lincRNA          | 4  | 185505247 | 185546184          |
| ENSG00000254244 | 1.16343121  | 2.039052734 | pseudogene       | 8  | 4644854   | 4646106 PAICSP4    |
| ENSG00000254245 | 3.274897671 | 2.851901313 | protein_coding   | 5  | 140723601 | 140892546 PCDHGA3  |
| ENSG00000254251 | 1.16343121  | 2.652276565 | antisense        | 8  | 91818702  | 91871468           |
| ENSG00000254258 | 0.869158192 | 1.925536307 | lincRNA          | 8  | 140472305 | 140475259          |
| ENSG00000254263 | 1.799000381 | 0.697730409 | lincRNA          | 8  | 130902711 | 130914004          |
| ENSG00000254267 | 0.499066092 | 0.697730409 | lincRNA          | 8  | 99383583  | 99400475           |
| ENSG00000254270 | 0.499066092 | 0.390640832 | pseudogene       | 7  | 139218986 | 139219295 ERHP1    |
| ENSG00000254272 | 0.869158192 | 1.518964905 | pseudogene       | 8  | 22350144  | 22350557           |
| ENSG00000254273 | 0           | 0.390640832 | pseudogene       | 8  | 74423511  | 74423889           |
| ENSG00000254274 | 0.499066092 | 0           | pseudogene       | 8  | 54985674  | 54986126 TDGF1P5   |
| ENSG00000254281 | 0.869158192 | 0           | lincRNA          | 8  | 103991013 | 104012412          |
| ENSG00000254285 | 2.847891871 | 2.652276565 | pseudogene       | 8  | 62490779  | 62492230 KRT8P3    |
| ENSG00000254286 | 2.671945279 | 0.697730409 | antisense        | 8  | 127570120 | 127725660          |
| ENSG00000254294 | 0.499066092 | 0.390640832 | pseudogene       | 8  | 124412822 | 124414335 IMPDH1P6 |
| ENSG00000254295 | 0.499066092 | 0           | lincRNA          | 5  | 172381910 | 172384165          |
| ENSG00000254300 | 0.499066092 | 1.518964905 | lincRNA          | 8  | 77318889  | 77436591           |
| ENSG00000254305 | 0           | 0.390640832 | pseudogene       | 8  | 77515475  | 77516087 MRPL9P1   |
| ENSG00000254316 | 0.499066092 | 0           | pseudogene       | 8  | 30107018  | 30107608           |
| ENSG00000254317 | 2.238690726 | 2.039052734 | antisense        | 8  | 130844547 | 130856750          |
| ENSG00000254325 | 0           | 1.16600992  | sense_intronic   | 8  | 56806154  | 56808276           |
| ENSG00000254328 | 0           | 0.390640832 | pseudogene       | 5  | 172413683 | 172414201          |
| ENSG00000254331 | 0           | 0.390640832 | pseudogene       | 8  | 81557174  | 81557408 CKS1BP7   |
| ENSG00000254332 | 1.960915222 | 2.242360793 | pseudogene       | 8  | 70041833  | 70042580           |
| ENSG00000254333 | 0           | 0.697730409 | lincRNA          | 5  | 149855094 | 149865531          |
| ENSG00000254338 | 1.960915222 | 3.027231696 | antisense        | 8  | 144499849 | 144501320          |
| ENSG00000254340 | 1.407729925 | 1.353254395 | antisense        | 8  | 8998934   | 9002945            |
| ENSG00000254343 | 1.960915222 | 2.039052734 | lincRNA          | 8  | 121064419 | 121068423          |
| ENSG00000254346 | 0.499066092 | 0.390640832 | pseudogene       | 8  | 32871599  | 32872541 MTND1P6   |
| ENSG00000254352 | 1.16343121  | 0           | pseudogene       | 8  | 79636031  | 79636371           |
| ENSG00000254362 | 0.499066092 | 0           | sense_intronic   | 8  | 26298007  | 26300111           |
| ENSG00000254363 | 1.407729925 | 1.518964905 | lincRNA          | 5  | 139536904 | 139548370          |
| ENSG00000254367 | 3.211941663 | 2.334191469 | lincRNA          | 8  | 8581203   | 8639989            |
| ENSG00000254369 | 1.16343121  | 1.518964905 | antisense        | 7  | 27169596  | 27195542           |
| ENSG00000254370 | 1.16343121  | 0.390640832 | sense_intronic   | 8  | 28273041  | 28277572           |
| ENSG00000254373 | 0.869158192 | 0.950786998 | pseudogene       | 5  | 159685260 | 159685592          |
| ENSG00000254387 | 0           | 0.390640832 | pseudogene       | 8  | 94861789  | 94862303           |
| ENSG00000254388 | 1.799000381 | 0.950786998 | pseudogene       | 8  | 124364421 | 124364883 DUTP2    |
| ENSG00000254389 | 3.274897671 | 3.813624741 | antisense        | 8  | 144448801 | 144450718 C8orf51  |
| ENSG00000254391 | 0           | 0.697730409 | antisense        | 5  | 160112358 | 160119896          |
| ENSG00000254396 | 0.499066092 | 0           | lincRNA          | 9  | 27102628  | 27104726           |
| ENSG00000254397 | 1.799000381 | 1.16600992  | antisense        | 11 | 9451903   | 9455033            |
| ENSG00000254398 | 0           | 0.390640832 | pseudogene       | 15 | 28924551  | 28927398           |
| ENSG00000254403 | 0           | 0.390640832 | pseudogene       | 11 | 59495992  | 59496965 OR10Y1P   |

|                 |             |             |                  |    |           |           |           |
|-----------------|-------------|-------------|------------------|----|-----------|-----------|-----------|
| ENSG00000254408 | 0.869158192 | 0.390640832 | pseudogene       | 11 | 49919819  | 49920738  | OR4A1P    |
| ENSG00000254409 | 0.869158192 | 1.16600992  | processed_transc | 11 | 43942609  | 44022707  |           |
| ENSG00000254412 | 0           | 0.390640832 | pseudogene       | 11 | 49119715  | 49122720  |           |
| ENSG00000254414 | 0.499066092 | 0.390640832 | antisense        | 15 | 85175129  | 85177218  |           |
| ENSG00000254418 | 0           | 1.518964905 | antisense        | 11 | 14284392  | 14295237  |           |
| ENSG00000254419 | 2.35979773  | 2.334191469 | sense_intronic   | 20 | 57285851  | 57286689  |           |
| ENSG00000254420 | 0           | 1.16600992  | antisense        | 11 | 78035804  | 78155095  |           |
| ENSG00000254428 | 3.871730003 | 3.906303962 | antisense        | 11 | 118874452 | 118875603 |           |
| ENSG00000254429 | 5.40360309  | 4.917990497 | antisense        | 11 | 74971171  | 74972069  |           |
| ENSG00000254431 | 0.869158192 | 0.697730409 | antisense        | 8  | 126360438 | 126363658 |           |
| ENSG00000254432 | 0           | 0.950786998 | antisense        | 8  | 61721294  | 61722165  |           |
| ENSG00000254433 | 1.16343121  | 1.802319292 | antisense        | 11 | 105956717 | 105972702 |           |
| ENSG00000254438 | 0.499066092 | 0           | lincRNA          | 11 | 13942997  | 13946410  |           |
| ENSG00000254440 | 0           | 0.390640832 | protein_coding   | 6  | 138537123 | 138539628 | PBOV1     |
| ENSG00000254441 | 1.407729925 | 0.697730409 | pseudogene       | 11 | 82546551  | 82548264  |           |
| ENSG00000254449 | 0.499066092 | 0.390640832 | pseudogene       | 11 | 123468654 | 123470160 | SF3A3P2   |
| ENSG00000254451 | 0.499066092 | 1.16600992  | antisense        | 12 | 75628520  | 75692288  |           |
| ENSG00000254454 | 1.407729925 | 0.697730409 | pseudogene       | 11 | 62138618  | 62140640  | RCC2P6    |
| ENSG00000254459 | 0.499066092 | 0.390640832 | processed_transc | 11 | 77540700  | 77583308  |           |
| ENSG00000254461 | 3.989024711 | 4.048652948 | antisense        | 11 | 66027038  | 66029305  |           |
| ENSG00000254463 | 1.960915222 | 0.950786998 | pseudogene       | 11 | 43487942  | 43488421  |           |
| ENSG00000254469 | 4.230497448 | 4.547834947 | protein_coding   | 11 | 71576555  | 71639700  |           |
| ENSG00000254470 | 7.026383958 | 6.900645892 | protein_coding   | 11 | 65543364  | 65548273  |           |
| ENSG00000254471 | 0.499066092 | 0           | pseudogene       | 11 | 79698556  | 79700673  |           |
| ENSG00000254473 | 3.004694206 | 4.075511708 | antisense        | 9  | 86322509  | 86328293  |           |
| ENSG00000254477 | 0.869158192 | 1.353254395 | antisense        | 11 | 59520488  | 59522448  |           |
| ENSG00000254479 | 1.16343121  | 0.950786998 | pseudogene       | 11 | 85645780  | 85646706  |           |
| ENSG00000254480 | 2.35979773  | 3.183544561 | processed_transc | 11 | 4208370   | 4223885   |           |
| ENSG00000254484 | 0.499066092 | 0.390640832 | sense_intronic   | 11 | 70166034  | 70167521  |           |
| ENSG00000254485 | 1.407729925 | 1.353254395 | processed_transc | 3  | 9334272   | 9404987   |           |
| ENSG00000254495 | 1.16343121  | 0.950786998 | antisense        | 11 | 70204304  | 70204783  |           |
| ENSG00000254500 | 0.499066092 | 0.390640832 | pseudogene       | 11 | 74363681  | 74363956  | RANP3     |
| ENSG00000254501 | 1.616589159 | 1.925536307 | antisense        | 11 | 64878186  | 64879167  |           |
| ENSG00000254502 | 0.869158192 | 0.390640832 | pseudogene       | 11 | 85906174  | 85907308  |           |
| ENSG00000254503 | 3.077135474 | 3.027231696 | pseudogene       | 19 | 17527840  | 17529097  |           |
| ENSG00000254504 | 0.499066092 | 0.390640832 | processed_transc | 11 | 71383721  | 71421627  |           |
| ENSG00000254505 | 3.335220907 | 3.87606762  | protein_coding   | 14 | 24678789  | 24683075  | CHMP4A    |
| ENSG00000254509 | 2.35979773  | 2.912743273 | pseudogene       | 11 | 124661124 | 124661556 |           |
| ENSG00000254512 | 1.407729925 | 1.16600992  | pseudogene       | 11 | 43755309  | 43756114  |           |
| ENSG00000254526 | 0           | 0.697730409 | lincRNA          | 11 | 29181503  | 29288281  |           |
| ENSG00000254531 | 4.800350936 | 5.004391715 | protein_coding   | 4  | 102268937 | 102270040 |           |
| ENSG00000254533 | 0.869158192 | 0           | protein_coding   | 8  | 145923999 | 145924570 |           |
| ENSG00000254536 | 0           | 0.950786998 | protein_coding   | 10 | 135204338 | 135233999 | MTG1      |
| ENSG00000254538 | 0           | 0.950786998 | lincRNA          | 8  | 74582676  | 74645132  |           |
| ENSG00000254539 | 2.471521042 | 2.420525079 | antisense        | 1  | 144833168 | 144835867 |           |
| ENSG00000254542 | 0.499066092 | 0           | antisense        | 11 | 20000245  | 20002883  | NAV2-AS3  |
| ENSG00000254543 | 0.499066092 | 0.697730409 | pseudogene       | 8  | 7748525   | 7750077   | HSPD1P2   |
| ENSG00000254545 | 1.407729925 | 1.16600992  | antisense        | 1  | 32254731  | 32256923  |           |
| ENSG00000254548 | 0           | 0.390640832 | antisense        | 8  | 144800416 | 144801061 |           |
| ENSG00000254550 | 1.407729925 | 0           | protein_coding   | 11 | 76813886  | 76814377  | OMP       |
| ENSG00000254551 | 1.16343121  | 0.950786998 | antisense        | 11 | 82920473  | 82924421  |           |
| ENSG00000254552 | 0.499066092 | 0           | antisense        | 2  | 167980414 | 167997465 | XIRP2-AS1 |
| ENSG00000254554 | 2.57521082  | 3.453019579 | antisense        | 11 | 10324204  | 10325251  |           |
| ENSG00000254556 | 1.799000381 | 1.925536307 | protein_coding   | 8  | 10994408  | 10996117  |           |
| ENSG00000254561 | 2.471521042 | 1.667587519 | antisense        | 11 | 119479135 | 119529994 |           |
| ENSG00000254565 | 0           | 0.390640832 | pseudogene       | 11 | 103276941 | 103277969 | MTND2P26  |
| ENSG00000254566 | 0.499066092 | 0           | lincRNA          | 11 | 36342708  | 36344990  |           |
| ENSG00000254574 | 0.869158192 | 0           | antisense        | 8  | 144791177 | 144795754 |           |
| ENSG00000254577 | 0           | 0.950786998 | processed_transc | 11 | 43411833  | 43417045  |           |
| ENSG00000254589 | 0.869158192 | 1.802319292 | pseudogene       | 11 | 58009515  | 58010569  |           |
| ENSG00000254590 | 0.499066092 | 0.697730409 | pseudogene       | 11 | 119273502 | 119274798 |           |
| ENSG00000254592 | 0           | 0.390640832 | antisense        | 11 | 3357951   | 3361860   |           |
| ENSG00000254593 | 0.499066092 | 0.697730409 | pseudogene       | 11 | 71614240  | 71615127  |           |

|                 |             |             |                  |    |           |                    |
|-----------------|-------------|-------------|------------------|----|-----------|--------------------|
| ENSG00000254595 | 3.554067925 | 2.912743273 | pseudogene       | 11 | 6509416   | 6510607            |
| ENSG00000254598 | 2.762599152 | 2.971122874 | pseudogene       | 11 | 11373498  | 11374668 CSNK2A1P  |
| ENSG00000254602 | 2.10647801  | 2.420525079 | processed_transc | 11 | 57405497  | 57420263           |
| ENSG00000254604 | 2.471521042 | 2.501982735 | antisense        | 11 | 70128473  | 70209474           |
| ENSG00000254606 | 0.499066092 | 0           | lincRNA          | 11 | 28538379  | 28540888           |
| ENSG00000254610 | 0.869158192 | 0.697730409 | lincRNA          | 11 | 67702034  | 67707245           |
| ENSG00000254612 | 1.407729925 | 1.16600992  | pseudogene       | 11 | 127810829 | 127811552          |
| ENSG00000254614 | 3.448790144 | 3.679994897 | protein_coding   | 11 | 64945077  | 64949305           |
| ENSG00000254615 | 5.223818625 | 3.608232228 | processed_transc | 8  | 107282481 | 107285002          |
| ENSG00000254616 | 0           | 0.950786998 | pseudogene       | 11 | 134042990 | 134043575          |
| ENSG00000254617 | 0.499066092 | 0.950786998 | pseudogene       | 11 | 89620534  | 89623159           |
| ENSG00000254620 | 2.35979773  | 1.518964905 | lincRNA          | 20 | 57169473  | 57179029           |
| ENSG00000254632 | 0           | 0.390640832 | antisense        | 11 | 76470960  | 76479267           |
| ENSG00000254634 | 4.097495944 | 4.021284656 | pseudogene       | 16 | 29437121  | 29552957           |
| ENSG00000254635 | 7.72361917  | 8.46996432  | antisense        | 10 | 28811581  | 28821672           |
| ENSG00000254637 | 0           | 0.390640832 | pseudogene       | 11 | 49938943  | 49940030 OR4A18P   |
| ENSG00000254639 | 1.799000381 | 2.851901313 | lincRNA          | 11 | 46259933  | 46260818           |
| ENSG00000254648 | 0           | 0.697730409 | lincRNA          | 11 | 133905727 | 133907002          |
| ENSG00000254656 | 0.499066092 | 0.697730409 | protein_coding   | 14 | 101346992 | 101351184 RTL1     |
| ENSG00000254662 | 0.499066092 | 0.390640832 | antisense        | 11 | 57093077  | 57095432           |
| ENSG00000254664 | 0.499066092 | 0           | antisense        | 11 | 45237366  | 45256843           |
| ENSG00000254669 | 0           | 0.390640832 | lincRNA          | 11 | 35600978  | 35606858           |
| ENSG00000254671 | 0.869158192 | 1.802319292 | protein_coding   | 11 | 125440180 | 125462473          |
| ENSG00000254672 | 0           | 0.697730409 | pseudogene       | 11 | 35988560  | 35990226           |
| ENSG00000254675 | 0           | 0.697730409 | antisense        | 11 | 77733979  | 77734767           |
| ENSG00000254676 | 1.799000381 | 2.851901313 | processed_transc | 11 | 82891186  | 82895562           |
| ENSG00000254677 | 0.869158192 | 0           | pseudogene       | 11 | 90847892  | 90849119           |
| ENSG00000254678 | 0.499066092 | 0.390640832 | pseudogene       | 11 | 117014607 | 117014907          |
| ENSG00000254681 | 0.869158192 | 1.518964905 | pseudogene       | 16 | 18458147  | 18495797           |
| ENSG00000254682 | 5.255381949 | 5.018301917 | antisense        | 11 | 71159720  | 71163203           |
| ENSG00000254685 | 6.343050432 | 7.026422172 | protein_coding   | 1  | 74663922  | 74699770 FPGT      |
| ENSG00000254688 | 0           | 1.16600992  | antisense        | 11 | 12843982  | 12845214           |
| ENSG00000254690 | 2.238690726 | 2.501982735 | antisense        | 8  | 145538253 | 145538801          |
| ENSG00000254691 | 0.499066092 | 0.950786998 | antisense        | 11 | 77561650  | 77562557           |
| ENSG00000254693 | 0           | 0.697730409 | antisense        | 11 | 44626058  | 44626887           |
| ENSG00000254694 | 0.869158192 | 1.925536307 | antisense        | 11 | 126078506 | 126078922          |
| ENSG00000254702 | 0           | 0.390640832 | pseudogene       | 11 | 107606735 | 107609444          |
| ENSG00000254707 | 0           | 0.697730409 | antisense        | 11 | 7726835   | 7731064            |
| ENSG00000254708 | 0.499066092 | 1.518964905 | pseudogene       | 11 | 34356665  | 34357550           |
| ENSG00000254710 | 0.499066092 | 0.390640832 | antisense        | 11 | 123059510 | 123098985          |
| ENSG00000254716 | 1.407729925 | 1.16600992  | lincRNA          | 11 | 134815478 | 134846593          |
| ENSG00000254718 | 1.407729925 | 1.518964905 | antisense        | 14 | 60706839  | 60715483           |
| ENSG00000254726 | 6.640654398 | 6.365895578 | protein_coding   | 1  | 156046280 | 156051789 MEX3A    |
| ENSG00000254731 | 0.869158192 | 0.950786998 | lincRNA          | 11 | 86414141  | 86425134           |
| ENSG00000254732 | 0           | 0.950786998 | protein_coding   | 11 | 57509635  | 57560715           |
| ENSG00000254734 | 0           | 0.390640832 | processed_transc | 11 | 29735456  | 29903261           |
| ENSG00000254739 | 1.616589159 | 2.721932731 | antisense        | 11 | 528907    | 529659             |
| ENSG00000254740 | 0.499066092 | 0           | protein_coding   | 11 | 119251452 | 119252291          |
| ENSG00000254741 | 1.616589159 | 0.697730409 | antisense        | 8  | 144661806 | 144662840          |
| ENSG00000254742 | 0.869158192 | 1.518964905 | antisense        | 11 | 62357121  | 62357959           |
| ENSG00000254743 | 0           | 0.390640832 | pseudogene       | 11 | 59508798  | 59509522 OR10V3P   |
| ENSG00000254756 | 0.869158192 | 1.353254395 | antisense        | 11 | 66101965  | 66107346           |
| ENSG00000254757 | 0           | 0.390640832 | lincRNA          | 11 | 3490549   | 3552558            |
| ENSG00000254759 | 0.869158192 | 0.950786998 | pseudogene       | 11 | 125937434 | 125938496 NAP1L1P1 |
| ENSG00000254760 | 0.869158192 | 1.925536307 | antisense        | 19 | 51917552  | 51918219           |
| ENSG00000254771 | 1.16343121  | 0.390640832 | pseudogene       | 11 | 126049392 | 126049593          |
| ENSG00000254772 | 0           | 0.390640832 | protein_coding   | 11 | 62327073  | 62342401 EEF1G     |
| ENSG00000254774 | 1.960915222 | 0.697730409 | protein_coding   | 8  | 11410733  | 11411716           |
| ENSG00000254777 | 0.869158192 | 0           | lincRNA          | 8  | 61822612  | 61879116           |
| ENSG00000254780 | 0           | 1.16600992  | pseudogene       | 11 | 47926875  | 47927159           |
| ENSG00000254783 | 2.671945279 | 3.027231696 | pseudogene       | 11 | 85994969  | 85995710           |
| ENSG00000254791 | 0.499066092 | 1.353254395 | sense_intronic   | 11 | 13690874  | 13691696 FAR1-IT1  |
| ENSG00000254793 | 0           | 0.390640832 | pseudogene       | 15 | 43231508  | 43232556 FDPSP4    |

|                 |             |             |                  |    |           |           |            |
|-----------------|-------------|-------------|------------------|----|-----------|-----------|------------|
| ENSG00000254802 | 0.499066092 | 0           | processed_transc | 8  | 61878361  | 61880334  |            |
| ENSG00000254805 | 0           | 0.390640832 | pseudogene       | 11 | 71401499  | 71401703  |            |
| ENSG00000254812 | 0.499066092 | 2.144285137 | antisense        | 8  | 144714241 | 144715926 |            |
| ENSG00000254814 | 0.869158192 | 0.950786998 | antisense        | 11 | 75511922  | 75514460  |            |
| ENSG00000254815 | 3.448790144 | 2.788380093 | antisense        | 11 | 557595    | 560107    |            |
| ENSG00000254818 | 1.616589159 | 1.16600992  | pseudogene       | 11 | 89677203  | 89682570  |            |
| ENSG00000254821 | 0.499066092 | 0.697730409 | antisense        | 6  | 4135657   | 4146287   |            |
| ENSG00000254824 | 0           | 0.390640832 | pseudogene       | 11 | 103280308 | 103280385 |            |
| ENSG00000254826 | 1.616589159 | 0.950786998 | sense_intronic   | 11 | 75486949  | 75487974  |            |
| ENSG00000254827 | 2.847891871 | 2.579085888 | protein_coding   | 11 | 2909010   | 2924970   | SLC22A18AS |
| ENSG00000254833 | 2.471521042 | 2.334191469 | protein_coding   | 11 | 126030609 | 126045930 |            |
| ENSG00000254837 | 3.448790144 | 4.585695337 | processed_transc | 11 | 74204411  | 74209578  |            |
| ENSG00000254839 | 0.869158192 | 0.950786998 | protein_coding   | 8  | 10920157  | 10924599  |            |
| ENSG00000254842 | 1.960915222 | 1.802319292 | protein_coding   | 11 | 130714086 | 130732005 |            |
| ENSG00000254843 | 1.16343121  | 1.16600992  | pseudogene       | 11 | 86805776  | 86807627  |            |
| ENSG00000254846 | 0           | 0.390640832 | antisense        | 14 | 20812392  | 20815047  |            |
| ENSG00000254847 | 0.499066092 | 0.390640832 | lincRNA          | 11 | 12559630  | 12562514  |            |
| ENSG00000254851 | 0           | 0.390640832 | pseudogene       | 11 | 117006244 | 117009298 |            |
| ENSG00000254854 | 2.238690726 | 2.039052734 | antisense        | 11 | 119600293 | 119610333 |            |
| ENSG00000254855 | 1.799000381 | 1.802319292 | antisense        | 11 | 66032248  | 66033137  |            |
| ENSG00000254856 | 0           | 0.950786998 | pseudogene       | 11 | 68256077  | 68256308  |            |
| ENSG00000254858 | 8.387780826 | 8.386624806 | protein_coding   | 19 | 18304028  | 18307552  | MPV17L2    |
| ENSG00000254859 | 1.616589159 | 0.950786998 | antisense        | 8  | 144624143 | 144631899 |            |
| ENSG00000254860 | 3.78787645  | 3.813624741 | antisense        | 11 | 8986222   | 8999074   | TMEM9B-AS1 |
| ENSG00000254862 | 0.499066092 | 0.390640832 | antisense        | 11 | 27493276  | 27503980  |            |
| ENSG00000254864 | 0           | 0.390640832 | antisense        | 11 | 7590097   | 7593277   |            |
| ENSG00000254865 | 0.869158192 | 0           | antisense        | 11 | 10170739  | 10186656  |            |
| ENSG00000254866 | 0           | 0.390640832 | pseudogene       | 8  | 12008400  | 12008643  | DEFB109P3  |
| ENSG00000254867 | 1.16343121  | 0.697730409 | pseudogene       | 11 | 65751150  | 65751802  |            |
| ENSG00000254869 | 0.499066092 | 0           | lincRNA          | 8  | 61565061  | 61566120  |            |
| ENSG00000254872 | 1.407729925 | 1.518964905 | processed_transc | 11 | 1049880   | 1055749   |            |
| ENSG00000254873 | 0.869158192 | 0.697730409 | protein_coding   | 11 | 118267810 | 118272610 |            |
| ENSG00000254876 | 1.616589159 | 2.039052734 | processed_transc | 9  | 100000731 | 100059596 |            |
| ENSG00000254883 | 0           | 0.390640832 | pseudogene       | 11 | 67511793  | 67512116  |            |
| ENSG00000254884 | 0           | 0.390640832 | pseudogene       | 11 | 9332831   | 9333236   |            |
| ENSG00000254887 | 0           | 0.697730409 | antisense        | 19 | 42636707  | 42641251  |            |
| ENSG00000254893 | 1.407729925 | 1.353254395 | pseudogene       | 5  | 75465910  | 75470170  |            |
| ENSG00000254897 | 0           | 0.390640832 | pseudogene       | 11 | 85163326  | 85164742  |            |
| ENSG00000254898 | 0           | 0.390640832 | antisense        | 8  | 38193499  | 38195069  |            |
| ENSG00000254900 | 1.616589159 | 1.353254395 | antisense        | 11 | 8700636   | 8702460   |            |
| ENSG00000254901 | 6.676071387 | 7.195117037 | protein_coding   | 19 | 19287712  | 19303400  | MEF2BNB    |
| ENSG00000254907 | 0.499066092 | 1.353254395 | antisense        | 11 | 43350298  | 43380846  |            |
| ENSG00000254909 | 3.448790144 | 2.788380093 | pseudogene       | 11 | 118876437 | 118876644 |            |
| ENSG00000254910 | 1.407729925 | 1.518964905 | antisense        | 11 | 310139    | 311141    |            |
| ENSG00000254911 | 2.238690726 | 2.420525079 | antisense        | 11 | 93454679  | 93455031  | SCARNA9    |
| ENSG00000254912 | 0           | 1.667587519 | pseudogene       | 15 | 32786204  | 32792547  |            |
| ENSG00000254918 | 1.616589159 | 3.183544561 | protein_coding   | 11 | 133778459 | 133782257 |            |
| ENSG00000254924 | 1.16343121  | 0.697730409 | pseudogene       | 11 | 71217114  | 71217426  |            |
| ENSG00000254936 | 1.960915222 | 1.353254395 | protein_coding   | 8  | 10980891  | 10983574  |            |
| ENSG00000254940 | 0           | 0.390640832 | pseudogene       | 11 | 49941864  | 49942966  | OR4A19P    |
| ENSG00000254941 | 0.499066092 | 1.353254395 | pseudogene       | 11 | 124677718 | 124678165 |            |
| ENSG00000254944 | 0.869158192 | 0.390640832 | pseudogene       | 11 | 122831035 | 122831794 | ATP5F1P5   |
| ENSG00000254945 | 3.146112541 | 2.579085888 | pseudogene       | 8  | 8086117   | 8102387   |            |
| ENSG00000254951 | 0.499066092 | 0.697730409 | processed_transc | 11 | 7726175   | 7927502   |            |
| ENSG00000254964 | 1.407729925 | 0.390640832 | antisense        | 11 | 62373633  | 62373877  |            |
| ENSG00000254966 | 0.869158192 | 0.950786998 | antisense        | 11 | 18728084  | 18762115  |            |
| ENSG00000254973 | 2.10647801  | 0.697730409 | lincRNA          | 8  | 144840323 | 144853992 |            |
| ENSG00000254974 | 0.869158192 | 0           | pseudogene       | 11 | 74196625  | 74197096  |            |
| ENSG00000254977 | 0.499066092 | 0           | antisense        | 7  | 74862851  | 74863847  |            |
| ENSG00000254978 | 0.869158192 | 0.390640832 | pseudogene       | 11 | 71511587  | 71515691  |            |
| ENSG00000254981 | 0.499066092 | 0           | antisense        | 8  | 38258054  | 38259201  |            |
| ENSG00000254982 | 1.960915222 | 1.16600992  | pseudogene       | 17 | 35500531  | 35501387  | HMGB1P24   |
| ENSG00000254984 | 0.869158192 | 0.697730409 | pseudogene       | 11 | 66538717  | 66539138  |            |

|                 |             |             |                  |    |           |           |                 |
|-----------------|-------------|-------------|------------------|----|-----------|-----------|-----------------|
| ENSG00000254985 | 0.869158192 | 0.697730409 | sense_intronic   | 11 | 77428757  | 77429456  | RSF1-IT2        |
| ENSG00000254986 | 10.97893166 | 11.27509531 | protein_coding   | 11 | 66247484  | 66277130  | DPP3            |
| ENSG00000254988 | 0           | 0.390640832 | antisense        | 11 | 76666461  | 76689663  |                 |
| ENSG00000254990 | 0.499066092 | 0.697730409 | lincRNA          | 11 | 111639392 | 111649074 |                 |
| ENSG00000254991 | 0.499066092 | 1.802319292 | lincRNA          | 11 | 12088476  | 12094561  |                 |
| ENSG00000254995 | 3.077135474 | 3.493416095 | protein_coding   | 20 | 57226490  | 57290466  | STX16-NPEPL1    |
| ENSG00000254996 | 3.146112541 | 2.788380093 | protein_coding   | 5  | 139781493 | 139929154 | ANKHD1-EIF4EBP3 |
| ENSG00000254997 | 1.960915222 | 3.411459265 | protein_coding   | 11 | 71259466  | 71260653  | KRTAP5-9        |
| ENSG00000254999 | 9.535360944 | 9.825744083 | protein_coding   | 3  | 10157276  | 10168874  | BRK1            |
| ENSG00000255000 | 0           | 0.390640832 | pseudogene       | 8  | 146273246 | 146274275 |                 |
| ENSG00000255002 | 0           | 0.390640832 | lincRNA          | 14 | 65679611  | 65689065  |                 |
| ENSG00000255004 | 0.499066092 | 0           | antisense        | 11 | 35303360  | 35307556  |                 |
| ENSG00000255006 | 0           | 0.390640832 | pseudogene       | 11 | 120490643 | 120490976 |                 |
| ENSG00000255007 | 0           | 0.390640832 | antisense        | 11 | 46277906  | 46296098  |                 |
| ENSG00000255008 | 0.869158192 | 0           | lincRNA          | 11 | 59328572  | 59333547  |                 |
| ENSG00000255010 | 0.869158192 | 0.950786998 | pseudogene       | 11 | 82817622  | 82818003  |                 |
| ENSG00000255026 | 4.883502971 | 4.547834947 | antisense        | 11 | 287305    | 288987    |                 |
| ENSG00000255028 | 0           | 0.390640832 | processed_transc | 11 | 109225812 | 109454633 |                 |
| ENSG00000255031 | 4.6658819   | 3.993387124 | processed_transc | 11 | 67818207  | 67821229  |                 |
| ENSG00000255038 | 0           | 0.390640832 | protein_coding   | 11 | 65834748  | 65837090  |                 |
| ENSG00000255040 | 0           | 0.697730409 | pseudogene       | 11 | 14695152  | 14696101  |                 |
| ENSG00000255042 | 0           | 0.390640832 | pseudogene       | 11 | 50246832  | 50254505  |                 |
| ENSG00000255045 | 0.499066092 | 1.16600992  | antisense        | 11 | 124614530 | 124616233 |                 |
| ENSG00000255046 | 1.407729925 | 1.518964905 | protein_coding   | 8  | 11655437  | 11660077  |                 |
| ENSG00000255050 | 1.407729925 | 0.697730409 | antisense        | 8  | 144655660 | 144659567 |                 |
| ENSG00000255051 | 0           | 0.390640832 | pseudogene       | 11 | 82843098  | 82845779  | BCAS2P1         |
| ENSG00000255052 | 0.869158192 | 1.667587519 | antisense        | 8  | 11973284  | 12008698  | FAM66D          |
| ENSG00000255056 | 2.57521082  | 3.32456471  | antisense        | 7  | 97935795  | 97937162  | BAIAP2L1        |
| ENSG00000255057 | 0.499066092 | 0           | pseudogene       | 11 | 129878481 | 129879660 |                 |
| ENSG00000255058 | 0           | 0.390640832 | pseudogene       | 11 | 64927665  | 64927853  |                 |
| ENSG00000255062 | 2.762599152 | 1.518964905 | protein_coding   | 11 | 126164193 | 126174213 |                 |
| ENSG00000255063 | 0           | 0.390640832 | pseudogene       | 11 | 82516396  | 82517551  |                 |
| ENSG00000255067 | 0           | 0.390640832 | sense_intronic   | 11 | 12870342  | 12870980  |                 |
| ENSG00000255084 | 0           | 0.390640832 | antisense        | 11 | 78244222  | 78269611  |                 |
| ENSG00000255085 | 0.499066092 | 0           | protein_coding   | 8  | 145925738 | 145932815 |                 |
| ENSG00000255089 | 0.869158192 | 1.802319292 | antisense        | 11 | 321991    | 322426    |                 |
| ENSG00000255090 | 3.502389126 | 2.242360793 | processed_transc | 11 | 122026130 | 122293579 |                 |
| ENSG00000255092 | 0.499066092 | 0.697730409 | antisense        | 11 | 44627720  | 44629651  |                 |
| ENSG00000255094 | 0           | 1.518964905 | lincRNA          | 11 | 28000216  | 28041122  |                 |
| ENSG00000255097 | 0           | 0.697730409 | sense_intronic   | 11 | 9263995   | 9267056   |                 |
| ENSG00000255098 | 0.499066092 | 1.353254395 | protein_coding   | 8  | 11870545  | 11873043  |                 |
| ENSG00000255100 | 0.499066092 | 1.16600992  | antisense        | 11 | 76493625  | 76494106  |                 |
| ENSG00000255103 | 6.554468172 | 6.686500471 | protein_coding   | 1  | 39876151  | 39882154  | KIAA0754        |
| ENSG00000255104 | 0           | 0.697730409 | protein_coding   | 17 | 15603055  | 15648092  |                 |
| ENSG00000255108 | 0.869158192 | 0.390640832 | antisense        | 11 | 823634    | 832883    |                 |
| ENSG00000255111 | 1.960915222 | 2.039052734 | pseudogene       | 11 | 49913814  | 49915329  |                 |
| ENSG00000255112 | 9.674658935 | 9.081580806 | protein_coding   | 18 | 11851439  | 11854448  | CHMP1B          |
| ENSG00000255120 | 0.869158192 | 1.16600992  | antisense        | 11 | 65556522  | 65558339  |                 |
| ENSG00000255121 | 5.575999561 | 5.767861411 | protein_coding   | 11 | 118866905 | 118868714 |                 |
| ENSG00000255122 | 0.499066092 | 0.390640832 | pseudogene       | 8  | 12437796  | 12438572  |                 |
| ENSG00000255129 | 0.869158192 | 1.802319292 | antisense        | 11 | 113149159 | 113185159 |                 |
| ENSG00000255135 | 5.124761037 | 5.496926774 | antisense        | 11 | 76152382  | 76155618  |                 |
| ENSG00000255139 | 3.335220907 | 3.279072565 | antisense        | 11 | 59383902  | 59407334  |                 |
| ENSG00000255141 | 0.499066092 | 0.950786998 | pseudogene       | 11 | 3994111   | 3995467   |                 |
| ENSG00000255142 | 1.960915222 | 2.579085888 | antisense        | 11 | 781645    | 782105    |                 |
| ENSG00000255143 | 0.499066092 | 0           | processed_transc | 11 | 69975403  | 69995729  |                 |
| ENSG00000255145 | 0.869158192 | 1.16600992  | antisense        | 9  | 102648608 | 102668883 |                 |
| ENSG00000255146 | 0.499066092 | 0.390640832 | lincRNA          | 11 | 57811582  | 57827610  |                 |
| ENSG00000255148 | 0.499066092 | 0.390640832 | antisense        | 1  | 144858174 | 144865800 |                 |
| ENSG00000255150 | 5.054730169 | 3.493416095 | protein_coding   | 12 | 104697517 | 104698980 | EID3            |
| ENSG00000255151 | 0.499066092 | 0           | pseudogene       | 11 | 58853735  | 58862662  |                 |
| ENSG00000255153 | 3.603959378 | 4.508954154 | antisense        | 11 | 1330999   | 1331937   |                 |
| ENSG00000255154 | 2.10647801  | 2.420525079 | protein_coding   | 3  | 58291974  | 58305920  |                 |

|                 |             |             |                  |    |           |           |          |
|-----------------|-------------|-------------|------------------|----|-----------|-----------|----------|
| ENSG00000255158 | 2.10647801  | 1.802319292 | antisense        | 11 | 665910    | 678391    |          |
| ENSG00000255159 | 0.869158192 | 1.518964905 | antisense        | 11 | 8790325   | 8831778   |          |
| ENSG00000255160 | 0           | 0.697730409 | lincRNA          | 11 | 19321430  | 19329905  |          |
| ENSG00000255165 | 0.869158192 | 0           | sense_intronic   | 11 | 44093012  | 44093953  |          |
| ENSG00000255176 | 3.335220907 | 3.183544561 | antisense        | 11 | 118507338 | 118508815 |          |
| ENSG00000255181 | 0.869158192 | 0.390640832 | protein_coding   | 8  | 144788864 | 144790279 | CCDC166  |
| ENSG00000255182 | 1.616589159 | 1.802319292 | protein_coding   | 8  | 145721001 | 145730827 |          |
| ENSG00000255185 | 3.004694206 | 3.279072565 | pseudogene       | 16 | 70044654  | 70099848  |          |
| ENSG00000255188 | 0.499066092 | 0           | pseudogene       | 11 | 129657959 | 129658085 |          |
| ENSG00000255192 | 0           | 0.390640832 | pseudogene       | 15 | 35376394  | 35377311  | NANOGP8  |
| ENSG00000255197 | 1.16343121  | 3.279072565 | antisense        | 11 | 47404699  | 47430741  |          |
| ENSG00000255198 | 3.554067925 | 4.857374129 | lincRNA          | 16 | 2014960   | 2015510   | SNHG9    |
| ENSG00000255200 | 1.799000381 | 1.802319292 | pseudogene       | 11 | 64941588  | 64943941  |          |
| ENSG00000255201 | 0.499066092 | 1.518964905 | antisense        | 8  | 38279407  | 38283614  |          |
| ENSG00000255202 | 0.499066092 | 0           | antisense        | 11 | 33686766  | 33718247  |          |
| ENSG00000255203 | 0           | 0.697730409 | pseudogene       | 11 | 86568101  | 86568989  | OR7E2P   |
| ENSG00000255205 | 0           | 0.390640832 | pseudogene       | 11 | 96871274  | 96871711  |          |
| ENSG00000255210 | 0.499066092 | 0.390640832 | pseudogene       | 11 | 109920253 | 109920885 |          |
| ENSG00000255213 | 0           | 1.518964905 | pseudogene       | 11 | 62098418  | 62099285  |          |
| ENSG00000255220 | 0           | 1.16600992  | pseudogene       | 11 | 130165536 | 130166841 | DDX18P5  |
| ENSG00000255222 | 0           | 0.697730409 | pseudogene       | 11 | 86005802  | 86006618  | SETP17   |
| ENSG00000255224 | 3.274897671 | 3.781359661 | antisense        | 8  | 145132905 | 145134168 |          |
| ENSG00000255227 | 0           | 0.390640832 | lincRNA          | 11 | 29467034  | 29478940  |          |
| ENSG00000255231 | 0           | 0.390640832 | pseudogene       | 11 | 112079324 | 112079621 | MRPS36P4 |
| ENSG00000255234 | 0.869158192 | 0.950786998 | processed_transc | 11 | 82997171  | 83134559  |          |
| ENSG00000255236 | 1.407729925 | 1.518964905 | antisense        | 11 | 67889520  | 67897979  |          |
| ENSG00000255237 | 1.407729925 | 1.518964905 | antisense        | 11 | 462930    | 463899    |          |
| ENSG00000255239 | 0.869158192 | 1.16600992  | pseudogene       | 11 | 118558748 | 118561309 |          |
| ENSG00000255247 | 0.499066092 | 0           | protein_coding   | 11 | 119580630 | 119584635 |          |
| ENSG00000255248 | 7.768062907 | 7.219404604 | processed_transc | 11 | 121899063 | 121987031 |          |
| ENSG00000255250 | 1.407729925 | 0.950786998 | lincRNA          | 11 | 86438397  | 86476307  |          |
| ENSG00000255256 | 0           | 0.390640832 | sense_intronic   | 11 | 35993978  | 36010557  |          |
| ENSG00000255260 | 0.499066092 | 0           | lincRNA          | 11 | 11264735  | 11265262  |          |
| ENSG00000255263 | 2.57521082  | 2.334191469 | antisense        | 11 | 82530209  | 82533921  |          |
| ENSG00000255266 | 0           | 0.390640832 | pseudogene       | 11 | 57637794  | 57638043  |          |
| ENSG00000255275 | 0           | 0.390640832 | protein_coding   | 1  | 19180707  | 19247615  |          |
| ENSG00000255277 | 0.499066092 | 0.950786998 | pseudogene       | 16 | 14914649  | 14918563  | ABCC6P2  |
| ENSG00000255282 | 0.869158192 | 0           | pseudogene       | 11 | 102617699 | 102707497 |          |
| ENSG00000255284 | 4.863159938 | 5.236305879 | protein_coding   | 11 | 777578    | 784297    |          |
| ENSG00000255293 | 0           | 0.390640832 | pseudogene       | 11 | 23425351  | 23427649  |          |
| ENSG00000255296 | 0           | 0.390640832 | pseudogene       | 11 | 71649717  | 71650590  |          |
| ENSG00000255299 | 0           | 0.390640832 | lincRNA          | 11 | 58265361  | 58273231  |          |
| ENSG00000255302 | 9.405983977 | 9.162882465 | protein_coding   | 15 | 49170083  | 49172380  | EID1     |
| ENSG00000255303 | 0           | 0.390640832 | pseudogene       | 11 | 57633770  | 57634751  |          |
| ENSG00000255305 | 0.499066092 | 0           | pseudogene       | 11 | 89711708  | 89713829  |          |
| ENSG00000255306 | 3.652182994 | 3.96493948  | antisense        | 11 | 67792277  | 67797928  |          |
| ENSG00000255308 | 0           | 0.697730409 | antisense        | 11 | 19218322  | 19302973  |          |
| ENSG00000255310 | 5.175139844 | 5.516660875 | protein_coding   | 8  | 10964720  | 10967428  |          |
| ENSG00000255318 | 2.57521082  | 3.493416095 | lincRNA          | 11 | 67385750  | 67394775  |          |
| ENSG00000255319 | 0.499066092 | 0.950786998 | pseudogene       | 11 | 71422786  | 71492229  |          |
| ENSG00000255320 | 4.409500985 | 3.96493948  | antisense        | 11 | 66012311  | 66013710  |          |
| ENSG00000255321 | 0.499066092 | 0           | antisense        | 8  | 61464516  | 61465595  |          |
| ENSG00000255322 | 0.869158192 | 1.802319292 | lincRNA          | 11 | 28373654  | 28548588  |          |
| ENSG00000255325 | 0.499066092 | 0.697730409 | lincRNA          | 8  | 123497754 | 123502054 |          |
| ENSG00000255326 | 0.499066092 | 1.353254395 | antisense        | 11 | 75294241  | 75305710  |          |
| ENSG00000255327 | 1.960915222 | 0.950786998 | lincRNA          | 11 | 134820602 | 134821462 |          |
| ENSG00000255328 | 2.762599152 | 3.368666104 | lincRNA          | 11 | 327171    | 330122    |          |
| ENSG00000255329 | 0.499066092 | 1.667587519 | pseudogene       | 11 | 70125027  | 70125403  |          |
| ENSG00000255337 | 2.471521042 | 3.570966319 | antisense        | 11 | 102323650 | 102332739 |          |
| ENSG00000255342 | 0.499066092 | 0           | pseudogene       | 11 | 123006631 | 123007084 |          |
| ENSG00000255343 | 0           | 0.950786998 | processed_transc | 8  | 144915440 | 144916233 |          |
| ENSG00000255345 | 0.869158192 | 1.667587519 | lincRNA          | 11 | 78803893  | 78809048  |          |
| ENSG00000255346 | 1.407729925 | 0.950786998 | protein_coding   | 15 | 69307034  | 69349501  | NOX5     |



|                 |             |             |                  |    |           |           |          |
|-----------------|-------------|-------------|------------------|----|-----------|-----------|----------|
| ENSG00000255348 | 0           | 0.390640832 | antisense        | 11 | 134048719 | 134056061 |          |
| ENSG00000255350 | 0           | 0.390640832 | pseudogene       | 11 | 103275037 | 103276562 |          |
| ENSG00000255351 | 0.499066092 | 1.16600992  | antisense        | 11 | 11373973  | 11374854  |          |
| ENSG00000255353 | 2.671945279 | 0.390640832 | pseudogene       | 11 | 107047012 | 107048256 |          |
| ENSG00000255354 | 0           | 0.390640832 | protein_coding   | 8  | 11415975  | 11417529  |          |
| ENSG00000255355 | 1.799000381 | 1.802319292 | antisense        | 11 | 59436785  | 59443514  |          |
| ENSG00000255362 | 0.869158192 | 0.697730409 | lincRNA          | 11 | 75922000  | 75927069  |          |
| ENSG00000255364 | 1.16343121  | 1.518964905 | lincRNA          | 8  | 123426571 | 123440790 |          |
| ENSG00000255366 | 0.499066092 | 0           | protein_coding   | 8  | 48102395  | 48104885  |          |
| ENSG00000255367 | 0           | 1.16600992  | processed_transc | 11 | 3502750   | 3602441   |          |
| ENSG00000255370 | 0.499066092 | 0           | pseudogene       | 11 | 31302219  | 31302534  |          |
| ENSG00000255375 | 0.869158192 | 0.950786998 | lincRNA          | 11 | 32154245  | 32165125  |          |
| ENSG00000255379 | 0           | 0.390640832 | pseudogene       | 11 | 108693060 | 108693377 | CYCSP29  |
| ENSG00000255381 | 0           | 0.390640832 | pseudogene       | 11 | 58909594  | 58910083  |          |
| ENSG00000255382 | 0           | 0.390640832 | processed_transc | 11 | 82502704  | 82528188  |          |
| ENSG00000255384 | 0.499066092 | 0.697730409 | protein_coding   | 11 | 118303836 | 118305921 |          |
| ENSG00000255387 | 0.499066092 | 0.390640832 | pseudogene       | 11 | 4231584   | 4233321   |          |
| ENSG00000255389 | 1.16343121  | 2.420525079 | antisense        | 6  | 111921078 | 111923498 |          |
| ENSG00000255391 | 0.499066092 | 0.697730409 | pseudogene       | 11 | 87191778  | 87192339  |          |
| ENSG00000255395 | 0.869158192 | 0.697730409 | processed_transc | 11 | 74810217  | 74851193  |          |
| ENSG00000255397 | 1.407729925 | 1.353254395 | pseudogene       | 8  | 61850264  | 61852430  |          |
| ENSG00000255398 | 2.762599152 | 0.390640832 | protein_coding   | 12 | 123199303 | 123201439 | HCAR3    |
| ENSG00000255400 | 1.16343121  | 0.697730409 | lincRNA          | 11 | 12108438  | 12110988  |          |
| ENSG00000255408 | 3.274897671 | 3.183544561 | protein_coding   | 5  | 140180783 | 140391929 | PCDHA3   |
| ENSG00000255409 | 0           | 0.697730409 | sense_intronic   | 11 | 77449725  | 77450613  | RSF1-IT1 |
| ENSG00000255414 | 2.238690726 | 0.697730409 | processed_transc | 11 | 123325106 | 123331118 |          |
| ENSG00000255417 | 0           | 0.950786998 | pseudogene       | 11 | 103274240 | 103274895 |          |
| ENSG00000255418 | 0.499066092 | 0           | lincRNA          | 11 | 23186446  | 23224707  |          |
| ENSG00000255421 | 0.869158192 | 1.16600992  | antisense        | 11 | 75848359  | 75848775  |          |
| ENSG00000255422 | 0.499066092 | 0.390640832 | antisense        | 11 | 118575316 | 118620973 |          |
| ENSG00000255423 | 3.78787645  | 3.906303962 | protein_coding   | 3  | 73110810  | 73112488  | EBLN2    |
| ENSG00000255427 | 0.499066092 | 0.950786998 | lincRNA          | 11 | 34592423  | 34595529  |          |
| ENSG00000255434 | 0.869158192 | 0.390640832 | sense_intronic   | 11 | 75307189  | 75308315  |          |
| ENSG00000255435 | 0           | 0.697730409 | antisense        | 11 | 118382626 | 118401809 |          |
| ENSG00000255441 | 0.499066092 | 1.925536307 | antisense        | 19 | 51918978  | 51920679  |          |
| ENSG00000255442 | 0           | 0.390640832 | pseudogene       | 11 | 50129327  | 50149612  |          |
| ENSG00000255443 | 2.928422289 | 4.101879561 | antisense        | 11 | 35231890  | 35236532  |          |
| ENSG00000255445 | 0.869158192 | 1.353254395 | pseudogene       | 11 | 92885241  | 92885916  |          |
| ENSG00000255446 | 0.499066092 | 0           | antisense        | 11 | 62189317  | 62194196  |          |
| ENSG00000255449 | 0           | 0.697730409 | processed_transc | 11 | 77577458  | 77581137  |          |
| ENSG00000255450 | 0           | 0.950786998 | pseudogene       | 11 | 29297202  | 29298112  |          |
| ENSG00000255453 | 2.238690726 | 2.420525079 | antisense        | 11 | 59561584  | 59562189  |          |
| ENSG00000255455 | 5.60078458  | 4.794098771 | lincRNA          | 11 | 130732054 | 130737889 |          |
| ENSG00000255458 | 0.869158192 | 2.501982735 | processed_transc | 4  | 39640760  | 39668264  |          |
| ENSG00000255459 | 0.869158192 | 0.950786998 | pseudogene       | 8  | 7943544   | 7944287   |          |
| ENSG00000255462 | 0           | 0.697730409 | antisense        | 11 | 11591631  | 11595329  |          |
| ENSG00000255465 | 0           | 1.667587519 | lincRNA          | 11 | 128485760 | 128491711 |          |
| ENSG00000255467 | 0.499066092 | 0.390640832 | antisense        | 11 | 107975801 | 107992411 |          |
| ENSG00000255468 | 2.671945279 | 1.667587519 | protein_coding   | 11 | 66115421  | 66131231  |          |
| ENSG00000255470 | 0.499066092 | 0           | protein_coding   | 11 | 18161733  | 18211042  |          |
| ENSG00000255471 | 2.671945279 | 1.667587519 | antisense        | 11 | 86603256  | 86636079  |          |
| ENSG00000255474 | 0.499066092 | 0           | lincRNA          | 12 | 4809583   | 4829268   |          |
| ENSG00000255476 | 0.499066092 | 0.390640832 | antisense        | 11 | 9860690   | 9950810   |          |
| ENSG00000255478 | 0           | 0.390640832 | antisense        | 11 | 65134909  | 65142770  |          |
| ENSG00000255487 | 0           | 0.390640832 | antisense        | 8  | 38133406  | 38134198  |          |
| ENSG00000255491 | 0           | 0.390640832 | lincRNA          | 8  | 125823860 | 125827924 |          |
| ENSG00000255495 | 0.499066092 | 1.16600992  | antisense        | 8  | 12051976  | 12053789  |          |
| ENSG00000255496 | 0           | 0.390640832 | processed_transc | 11 | 27717859  | 27899195  |          |
| ENSG00000255502 | 0           | 0.697730409 | processed_transc | 11 | 97749781  | 97813762  |          |
| ENSG00000255503 | 1.616589159 | 1.353254395 | lincRNA          | 11 | 82783444  | 82808238  |          |
| ENSG00000255507 | 0.869158192 | 0.697730409 | antisense        | 11 | 75514476  | 75526451  |          |
| ENSG00000255508 | 3.274897671 | 4.319727133 | protein_coding   | 11 | 62327075  | 62359003  | MIR3654  |
| ENSG00000255509 | 4.75690578  | 2.242360793 | antisense        | 17 | 35218935  | 35293960  |          |

|                 |             |             |                    |    |           |                      |
|-----------------|-------------|-------------|--------------------|----|-----------|----------------------|
| ENSG00000255517 | 4.842525946 | 5.137803333 | antisense          | 11 | 66240961  | 66247704             |
| ENSG00000255518 | 1.616589159 |             | 0 antisense        | 8  | 11413760  | 11415531             |
| ENSG00000255519 | 0           | 0.390640832 | pseudogene         | 11 | 45535737  | 45536001             |
| ENSG00000255520 | 0.499066092 |             | 0 antisense        | 11 | 47144655  | 47152352             |
| ENSG00000255521 | 3.502389126 | 2.971122874 | antisense          | 11 | 35154202  | 35159579             |
| ENSG00000255524 | 1.407729925 | 0.950786998 | protein_coding     | 16 | 28648975  | 28670003             |
| ENSG00000255529 | 7.746012174 | 7.614575135 | protein_coding     | 15 | 57884231  | 58074960 POLR2M      |
| ENSG00000255533 | 0.499066092 |             | 0 pseudogene       | 11 | 303856    | 304144               |
| ENSG00000255538 | 0.499066092 | 0.697730409 | pseudogene         | 11 | 59516284  | 59517047 OR10V2P     |
| ENSG00000255539 | 0           | 0.390640832 | antisense          | 11 | 70170977  | 70173315             |
| ENSG00000255541 | 0.499066092 |             | 0 pseudogene       | 11 | 82920441  | 82920676             |
| ENSG00000255547 | 0           | 0.390640832 | pseudogene         | 11 | 100207588 | 100208357            |
| ENSG00000255548 | 0.499066092 |             | 0 antisense        | 11 | 103816276 | 103817274            |
| ENSG00000255550 | 0           | 0.390640832 | pseudogene         | 11 | 49875632  | 49880954             |
| ENSG00000255553 | 0           | 0.390640832 | lincRNA            | 11 | 61844749  | 61849656             |
| ENSG00000255557 | 1.16343121  | 1.925536307 | lincRNA            | 11 | 65513200  | 65539056             |
| ENSG00000255559 | 0.499066092 | 1.16600992  | protein_coding     | 8  | 146228197 | 146231432 C8orf77    |
| ENSG00000255561 | 5.417620896 | 5.259915406 | protein_coding     | 11 | 111744780 | 111751967 FDXACB1    |
| ENSG00000255565 | 0           | 0.697730409 | lincRNA            | 12 | 15933002  | 15935054             |
| ENSG00000255566 | 2.762599152 | 2.420525079 | pseudogene         | 12 | 64836290  | 64837110             |
| ENSG00000255568 | 0.499066092 | 0.697730409 | protein_coding     | 21 | 40685888  | 40686369 BRWD1-IT2   |
| ENSG00000255571 | 4.165528823 |             | 0 processed_transc | 15 | 89904810  | 89939471             |
| ENSG00000255580 | 0.499066092 | 0.697730409 | lincRNA            | 11 | 115234348 | 115248649            |
| ENSG00000255581 | 0           | 0.390640832 | pseudogene         | 12 | 8169797   | 8170456              |
| ENSG00000255585 | 0.869158192 | 1.16600992  | pseudogene         | 9  | 140682122 | 140683139            |
| ENSG00000255604 | 1.407729925 | 3.532712221 | protein_coding     | 17 | 26694297  | 26700110 VTN         |
| ENSG00000255621 | 0.499066092 |             | 0 processed_transc | 12 | 13153385  | 13193613             |
| ENSG00000255622 | 0.869158192 | 1.353254395 | protein_coding     | 5  | 140535577 | 140538639            |
| ENSG00000255624 | 2.35979773  | 4.448594745 | pseudogene         | 10 | 124639246 | 124658230            |
| ENSG00000255633 | 1.16343121  | 2.579085888 | protein_coding     | 6  | 62284008  | 62284534 MTRNR2L9    |
| ENSG00000255642 | 0.869158192 | 2.144285137 | pseudogene         | 12 | 64215801  | 64217675             |
| ENSG00000255644 | 2.10647801  | 1.16600992  | antisense          | 12 | 21912914  | 21919639             |
| ENSG00000255647 | 0           | 0.390640832 | pseudogene         | 5  | 89705817  | 89706485             |
| ENSG00000255649 | 0.499066092 |             | 0 antisense        | 12 | 14683085  | 14686163             |
| ENSG00000255650 | 3.78787645  | 3.453019579 | processed_transc   | 12 | 110171971 | 110211313            |
| ENSG00000255651 | 0           | 0.390640832 | processed_transc   | 11 | 63534956  | 63536113             |
| ENSG00000255652 | 0.499066092 | 0.697730409 | lincRNA            | 12 | 34343972  | 34371788             |
| ENSG00000255655 | 0.499066092 |             | 0 antisense        | 12 | 109883215 | 109885302            |
| ENSG00000255661 | 2.10647801  | 2.420525079 | protein_coding     | 12 | 12878851  | 12982909             |
| ENSG00000255663 | 0.869158192 | 0.390640832 | processed_transc   | 11 | 114271404 | 114314654            |
| ENSG00000255669 | 0           | 0.390640832 | lincRNA            | 12 | 2870366   | 2879621              |
| ENSG00000255670 | 0.499066092 | 0.697730409 | lincRNA            | 12 | 12638287  | 12644515             |
| ENSG00000255681 | 0           | 0.390640832 | pseudogene         | 8  | 145774891 | 145775057            |
| ENSG00000255692 | 0.499066092 | 0.697730409 | protein_coding     | 12 | 120137573 | 120138816            |
| ENSG00000255693 | 0.499066092 |             | 0 lincRNA          | 12 | 65277174  | 65371302             |
| ENSG00000255698 | 1.960915222 | 1.925536307 | antisense          | 11 | 67180162  | 67181038             |
| ENSG00000255709 | 0.499066092 |             | 0 antisense        | 11 | 72466374  | 72477338 STARD10-AS1 |
| ENSG00000255710 | 1.16343121  | 3.368666104 | pseudogene         | 11 | 113691580 | 113692607            |
| ENSG00000255717 | 9.989357796 | 10.64864799 | ncrna_host         | 11 | 62619460  | 62623386 SNHG1       |
| ENSG00000255734 | 0.499066092 |             | 0 pseudogene       | 12 | 10264337  | 10265070             |
| ENSG00000255735 | 1.799000381 | 0.950786998 | pseudogene         | 2  | 241390181 | 241391848            |
| ENSG00000255737 | 6.469548347 | 6.915587884 | protein_coding     | 12 | 58120054  | 58122139             |
| ENSG00000255741 | 3.448790144 | 3.232099092 | antisense          | 11 | 68708971  | 68710320             |
| ENSG00000255746 | 0           | 0.390640832 | sense_intronic     | 12 | 362608    | 366465               |
| ENSG00000255748 | 2.35979773  | 2.334191469 | protein_coding     | 12 | 133787246 | 133787772            |
| ENSG00000255750 | 0.499066092 | 0.950786998 | antisense          | 12 | 26383752  | 26472653             |
| ENSG00000255753 | 3.554067925 | 3.532712221 | pseudogene         | 12 | 9466998   | 9468769              |
| ENSG00000255760 | 0.869158192 |             | 0 lincRNA          | 12 | 32030013  | 32040137             |
| ENSG00000255763 | 0           | 0.390640832 | pseudogene         | 12 | 14390025  | 14390255             |
| ENSG00000255773 | 4.062237333 | 4.048652948 | lincRNA            | 16 | 89978527  | 89981576             |
| ENSG00000255775 | 0           | 0.390640832 | lincRNA            | 12 | 6264201   | 6269885              |
| ENSG00000255780 | 0           | 0.390640832 | pseudogene         | 12 | 64426192  | 64426445             |
| ENSG00000255804 | 0           | 0.390640832 | protein_coding     | 14 | 23102673  | 23103716 OR6J1       |

|                 |             |   |                              |    |           |                       |
|-----------------|-------------|---|------------------------------|----|-----------|-----------------------|
| ENSG00000255808 | 0.869158192 |   | 0 antisense                  | 11 | 72354281  | 72370451              |
| ENSG00000255817 |             | 0 | 0.390640832 antisense        | 12 | 64502543  | 64514269              |
| ENSG00000255819 |             | 0 | 0.697730409 protein_coding   | 12 | 10524950  | 10562745              |
| ENSG00000255823 | 3.393122761 |   | 4.127774132 protein_coding   | 11 | 10529434  | 10530723 MTRNR2L8     |
| ENSG00000255837 | 2.847891871 |   | 3.027231696 protein_coding   | 12 | 11149094  | 11150474 TAS2R20      |
| ENSG00000255843 | 1.407729925 |   | 0.950786998 antisense        | 11 | 72013183  | 72014009              |
| ENSG00000255847 | 1.16343121  |   | 0.390640832 antisense        | 11 | 73674702  | 73681332              |
| ENSG00000255856 | 1.16343121  |   | 0.390640832 lincRNA          | 12 | 122445340 | 122457920             |
| ENSG00000255857 | 4.543379137 |   | 4.508954154 antisense        | 12 | 120639094 | 120650941             |
| ENSG00000255867 | 1.799000381 |   | 1.925536307 antisense        | 12 | 31742857  | 31768600 DENND5B-AS1  |
| ENSG00000255872 | 0.499066092 |   | 0.390640832 protein_coding   | 9  | 37588410  | 38068684              |
| ENSG00000255874 | 3.950976309 |   | 3.232099092 protein_coding   | 13 | 111521578 | 111522162 LINC00346   |
| ENSG00000255875 | 1.16343121  |   | 2.144285137 pseudogene       | 19 | 53313119  | 53313961              |
| ENSG00000255883 |             | 0 | 0.390640832 pseudogene       | 5  | 72804510  | 72805079              |
| ENSG00000255886 |             | 0 | 0.390640832 antisense        | 12 | 64432342  | 64491398              |
| ENSG00000255893 | 5.207774174 |   | 5.84793576 antisense         | 11 | 94206074  | 94206736              |
| ENSG00000255896 | 2.10647801  |   | 1.925536307 protein_coding   | 12 | 7080084   | 7105520               |
| ENSG00000255906 |             | 0 | 0.390640832 processed_transc | 12 | 124457788 | 124796476             |
| ENSG00000255909 | 0.869158192 |   | 1.518964905 pseudogene       | 12 | 19566087  | 19566395              |
| ENSG00000255916 | 2.238690726 |   | 2.420525079 antisense        | 12 | 132906436 | 132908161             |
| ENSG00000255921 | 0.869158192 |   | 2.144285137 antisense        | 12 | 25102097  | 25113092              |
| ENSG00000255931 |             | 0 | 0.390640832 lincRNA          | 11 | 61263912  | 61267548              |
| ENSG00000255933 | 1.960915222 |   | 1.353254395 lincRNA          | 12 | 132241511 | 132242592             |
| ENSG00000255946 | 0.869158192 |   | 0 antisense                  | 12 | 121178273 | 121199395             |
| ENSG00000255959 | 0.499066092 |   | 0.697730409 antisense        | 11 | 60603469  | 60610438              |
| ENSG00000255964 | 0.499066092 |   | 0.390640832 pseudogene       | 12 | 8167620   | 8169002               |
| ENSG00000255965 | 0.869158192 |   | 1.16600992 pseudogene        | 12 | 124867927 | 124868056             |
| ENSG00000255966 | 0.869158192 |   | 1.518964905 antisense        | 12 | 6641456   | 6642664               |
| ENSG00000255967 | 0.499066092 |   | 0 pseudogene                 | 12 | 8786963   | 8790204               |
| ENSG00000255968 | 1.16343121  |   | 0.950786998 antisense        | 12 | 26471886  | 26574395              |
| ENSG00000255970 | 0.499066092 |   | 0.950786998 lincRNA          | 12 | 68102827  | 68123255              |
| ENSG00000255974 | 0.869158192 |   | 1.353254395 protein_coding   | 19 | 41349444  | 41356352 CYP2A6       |
| ENSG00000255980 | 0.499066092 |   | 0.390640832 lincRNA          | 11 | 69240458  | 69244389              |
| ENSG00000255982 |             | 0 | 0.390640832 pseudogene       | 11 | 114383428 | 114384153             |
| ENSG00000255986 | 1.407729925 |   | 0.697730409 pseudogene       | 16 | 56669651  | 56670998 MT1JP        |
| ENSG00000255989 | 2.35979773  |   | 1.518964905 lincRNA          | 2  | 74213653  | 74220867              |
| ENSG00000255992 | 2.35979773  |   | 2.788380093 lincRNA          | 12 | 132409281 | 132413896             |
| ENSG00000255993 | 1.407729925 |   | 0.697730409 pseudogene       | 12 | 18845696  | 18847030 PSMC1P9      |
| ENSG00000255996 | 0.499066092 |   | 0.390640832 pseudogene       | 12 | 5141554   | 5142107               |
| ENSG00000256001 | 0.499066092 |   | 0.950786998 lincRNA          | 12 | 127629617 | 127631077             |
| ENSG00000256006 | 2.238690726 |   | 3.570966319 sense_intronic   | 11 | 18427156  | 18428278              |
| ENSG00000256011 | 0.869158192 |   | 0.390640832 antisense        | 12 | 13115234  | 13116473              |
| ENSG00000256018 | 3.554067925 |   | 4.274079748 protein_coding   | 6  | 26271146  | 26271612 HIST1H3G     |
| ENSG00000256019 | 0.499066092 |   | 0.390640832 pseudogene       | 12 | 11200931  | 11201855 TAS2R63P     |
| ENSG00000256020 | 0.499066092 |   | 0 sense_intronic             | 12 | 695031    | 695652                |
| ENSG00000256021 | 0.869158192 |   | 0.390640832 pseudogene       | 12 | 21600479  | 21601248              |
| ENSG00000256028 | 1.16343121  |   | 1.518964905 processed_transc | 12 | 123459867 | 123467454             |
| ENSG00000256029 | 0.499066092 |   | 0 protein_coding             | 1  | 159827690 | 159842843             |
| ENSG00000256030 | 0.869158192 |   | 0.950786998 pseudogene       | 12 | 2896097   | 2903461 CBX3P4        |
| ENSG00000256037 | 0.499066092 |   | 0.950786998 pseudogene       | 12 | 67745216  | 67745819              |
| ENSG00000256043 | 6.877132514 |   | 7.966311947 protein_coding   | 4  | 156845270 | 156875069 CTSO        |
| ENSG00000256045 | 1.407729925 |   | 2.334191469 protein_coding X |    | 55207824  | 55208944 MTRNR2L10    |
| ENSG00000256049 | 0.499066092 |   | 0 processed_transc           | 1  | 17698691  | 17728195 PADI6        |
| ENSG00000256050 | 1.616589159 |   | 1.802319292 protein_coding   | 14 | 105147483 | 105151269             |
| ENSG00000256053 | 3.077135474 |   | 2.788380093 protein_coding   | 14 | 104029299 | 104073860 APOPT1      |
| ENSG00000256056 | 0.499066092 |   | 1.353254395 pseudogene       | 12 | 27745394  | 27746972              |
| ENSG00000256060 | 5.223818625 |   | 4.888000647 protein_coding   | 19 | 57874879  | 57876721 TRAPPC2P1    |
| ENSG00000256061 | 2.35979773  |   | 2.420525079 protein_coding   | 15 | 55669222  | 55800432 DYX1C1-CCPG1 |
| ENSG00000256069 | 0.499066092 |   | 0.390640832 pseudogene       | 12 | 9381129   | 9428413 A2MP1         |
| ENSG00000256073 | 4.6658819   |   | 5.564846512 protein_coding   | 21 | 33765439  | 33766269 C21orf119    |
| ENSG00000256075 |             | 0 | 0.390640832 pseudogene       | 12 | 68867521  | 68868682              |
| ENSG00000256079 | 0.499066092 |   | 0.697730409 pseudogene       | 12 | 25588515  | 25589172              |
| ENSG00000256083 | 0.499066092 |   | 1.16600992 antisense         | 12 | 66328557  | 66342259              |

|                 |             |             |                  |    |           |           |             |
|-----------------|-------------|-------------|------------------|----|-----------|-----------|-------------|
| ENSG00000256087 | 8.445362311 | 8.89533508  | protein_coding   | 19 | 52536361  | 52552106  | ZNF432      |
| ENSG00000256091 | 0.499066092 | 0.390640832 | pseudogene       | 11 | 113582442 | 113583120 |             |
| ENSG00000256092 | 2.10647801  | 2.788380093 | lincRNA          | 12 | 123849500 | 123850660 |             |
| ENSG00000256101 | 0.869158192 | 0.950786998 | lincRNA          | 12 | 8474472   | 8482210   |             |
| ENSG00000256108 | 0.499066092 | 0.697730409 | pseudogene       | 12 | 133321742 | 133322315 |             |
| ENSG00000256116 | 1.16343121  | 1.16600992  | antisense        | 11 | 63996686  | 64001824  |             |
| ENSG00000256128 | 4.464551814 | 5.372493443 | lincRNA          | 12 | 127214333 | 127256957 |             |
| ENSG00000256134 | 0.499066092 | 0.390640832 | pseudogene       | 12 | 16124824  | 16125543  |             |
| ENSG00000256139 | 0.499066092 | 1.16600992  | processed_transc | 12 | 109549023 | 109563369 |             |
| ENSG00000256143 | 0.499066092 | 1.925536307 | pseudogene       | 4  | 123966    | 125423    |             |
| ENSG00000256148 | 2.847891871 | 2.144285137 | pseudogene       | 11 | 73221703  | 73221865  |             |
| ENSG00000256150 | 0.499066092 | 0           | lincRNA          | 12 | 2851792   | 2881074   |             |
| ENSG00000256151 | 5.889353623 | 6.110690132 | lincRNA          | 12 | 131474683 | 131478521 |             |
| ENSG00000256155 | 0           | 0.390640832 | lincRNA          | 12 | 10511063  | 10513644  |             |
| ENSG00000256159 | 1.407729925 | 0           | pseudogene       | 12 | 31630440  | 31630921  |             |
| ENSG00000256162 | 0.499066092 | 0.697730409 | protein_coding   | 6  | 131148546 | 131158275 |             |
| ENSG00000256167 | 1.407729925 | 1.802319292 | pseudogene       | 11 | 113659953 | 113662088 | ATF4P4      |
| ENSG00000256176 | 0.869158192 | 0           | pseudogene       | 12 | 31464551  | 31464963  |             |
| ENSG00000256185 | 3.335220907 | 3.813624741 | lincRNA          | 12 | 26488797  | 26489883  |             |
| ENSG00000256188 | 0.869158192 | 1.353254395 | protein_coding   | 12 | 11285557  | 11287243  | TAS2R30     |
| ENSG00000256189 | 0.499066092 | 0           | pseudogene       | 11 | 73702328  | 73703225  |             |
| ENSG00000256192 | 0           | 0.390640832 | pseudogene       | 12 | 64660193  | 64660546  |             |
| ENSG00000256195 | 0           | 0.390640832 | antisense        | 11 | 114231357 | 114250767 |             |
| ENSG00000256196 | 1.407729925 | 2.242360793 | antisense        | 11 | 60685941  | 60692869  |             |
| ENSG00000256199 | 0           | 0.390640832 | lincRNA          | 12 | 64900946  | 64927418  |             |
| ENSG00000256210 | 1.16343121  | 0.697730409 | pseudogene       | 19 | 14903121  | 14903589  |             |
| ENSG00000256211 | 0.869158192 | 0.390640832 | pseudogene       | 12 | 17142060  | 17142870  |             |
| ENSG00000256222 | 0.499066092 | 1.925536307 | protein_coding   | 20 | 55933496  | 55934878  | MTRNR2L3    |
| ENSG00000256223 | 6.138202758 | 6.264499759 | protein_coding   | 12 | 133707161 | 133736051 | ZNF10       |
| ENSG00000256226 | 0.499066092 | 0.390640832 | lincRNA          | 12 | 27258084  | 27314326  |             |
| ENSG00000256229 | 7.15746161  | 7.164171052 | protein_coding   | 19 | 20278023  | 20308984  | ZNF486      |
| ENSG00000256232 | 0.499066092 | 0.390640832 | lincRNA          | 12 | 31516415  | 31522235  |             |
| ENSG00000256234 | 0.869158192 | 1.16600992  | antisense        | 12 | 26364097  | 26488789  |             |
| ENSG00000256235 | 6.515894502 | 6.097646709 | protein_coding   | 5  | 150157508 | 150176296 | C5orf62     |
| ENSG00000256238 | 3.950976309 | 3.608232228 | pseudogene       | 12 | 16552208  | 16555340  |             |
| ENSG00000256240 | 4.6658819   | 4.048652948 | pseudogene       | 19 | 21301321  | 21301529  |             |
| ENSG00000256248 | 0.869158192 | 1.16600992  | lincRNA          | 12 | 67285656  | 67462942  |             |
| ENSG00000256249 | 0.499066092 | 0           | lincRNA          | 12 | 123171672 | 123200526 |             |
| ENSG00000256250 | 0           | 0.697730409 | lincRNA          | 12 | 131295151 | 131296983 |             |
| ENSG00000256262 | 0.869158192 | 2.144285137 | antisense        | 12 | 109490155 | 109491757 |             |
| ENSG00000256268 | 3.335220907 | 4.489113623 | lincRNA          | 12 | 65996649  | 66006777  |             |
| ENSG00000256269 | 9.260938843 | 9.10539747  | protein_coding   | 11 | 118955576 | 118964259 | HMBS        |
| ENSG00000256271 | 0.499066092 | 0           | antisense        | 12 | 2777666   | 2781386   | CACNA1C-AS2 |
| ENSG00000256274 | 0.499066092 | 0           | pseudogene       | 12 | 11229368  | 11231770  | TAS2R64P    |
| ENSG00000256278 | 1.16343121  | 1.16600992  | antisense        | 15 | 85154920  | 85158200  |             |
| ENSG00000256282 | 2.671945279 | 3.081239798 | pseudogene       | 11 | 18617006  | 18621230  |             |
| ENSG00000256283 | 0.499066092 | 0.390640832 | pseudogene       | 12 | 15408147  | 15408757  |             |
| ENSG00000256285 | 0.499066092 | 0           | pseudogene       | 12 | 66957304  | 66957474  |             |
| ENSG00000256293 | 0           | 0.697730409 | pseudogene       | 12 | 64731957  | 64732577  |             |
| ENSG00000256294 | 5.938793061 | 6.104183162 | protein_coding   | 19 | 44617548  | 44637255  | ZNF225      |
| ENSG00000256299 | 0.869158192 | 0           | lincRNA          | 12 | 131295366 | 131297167 |             |
| ENSG00000256302 | 2.471521042 | 1.667587519 | antisense        | 12 | 9800643   | 9801422   |             |
| ENSG00000256304 | 2.35979773  | 2.788380093 | pseudogene       | 12 | 122806669 | 122808883 |             |
| ENSG00000256312 | 0.869158192 | 0.697730409 | lincRNA          | 12 | 132674758 | 132675542 |             |
| ENSG00000256315 | 0           | 0.950786998 | processed_transc | 11 | 115267474 | 115268376 |             |
| ENSG00000256316 | 1.960915222 | 1.16600992  | protein_coding   | 6  | 26250370  | 26250835  | HIST1H3F    |
| ENSG00000256323 | 0           | 0.950786998 | pseudogene       | 16 | 542366    | 542567    |             |
| ENSG00000256325 | 0           | 0.697730409 | antisense        | 12 | 69221898  | 69222333  |             |
| ENSG00000256326 | 0.869158192 | 0.697730409 | pseudogene       | 12 | 31868273  | 31868715  |             |
| ENSG00000256338 | 3.077135474 | 3.453019579 | pseudogene       | 15 | 28560798  | 28561102  |             |
| ENSG00000256340 | 0.499066092 | 0           | pseudogene       | 16 | 18582484  | 18608289  | ABCC6P1     |
| ENSG00000256341 | 0.499066092 | 0           | antisense        | 11 | 63885744  | 63886682  |             |
| ENSG00000256347 | 0.499066092 | 0           | pseudogene       | 11 | 72959824  | 72960912  |             |

|                 |             |             |                  |    |           |                     |
|-----------------|-------------|-------------|------------------|----|-----------|---------------------|
| ENSG00000256351 | 0           | 0.390640832 | pseudogene       | 12 | 110297572 | 110298225           |
| ENSG00000256356 | 1.407729925 | 1.667587519 | pseudogene       | 12 | 4206617   | 4208685             |
| ENSG00000256360 | 1.16343121  | 1.353254395 | lincRNA          | 11 | 73639578  | 73641417            |
| ENSG00000256361 | 1.16343121  | 0.950786998 | pseudogene       | 11 | 18532590  | 18533022            |
| ENSG00000256362 | 0           | 0.390640832 | lincRNA          | 12 | 127808700 | 127824617           |
| ENSG00000256373 | 0           | 0.390640832 | lincRNA          | 12 | 11365126  | 11404303            |
| ENSG00000256377 | 0           | 1.802319292 | antisense        | 12 | 27849321  | 27863703            |
| ENSG00000256381 | 0           | 0.390640832 | lincRNA          | 12 | 4754662   | 4757193             |
| ENSG00000256383 | 3.211941663 | 2.851901313 | pseudogene       | 19 | 35166998  | 35168486            |
| ENSG00000256392 | 2.10647801  | 2.501982735 | processed_transc | 12 | 122217514 | 122241309           |
| ENSG00000256393 | 4.464551814 | 4.585695337 | pseudogene       | 12 | 93477374  | 93477451            |
| ENSG00000256394 | 0.869158192 | 0.697730409 | protein_coding   | 4  | 156750881 | 156787425 ACCN5     |
| ENSG00000256399 | 1.16343121  | 2.039052734 | pseudogene       | 12 | 64281159  | 64282378            |
| ENSG00000256403 | 0           | 0.390640832 | antisense        | 11 | 72121760  | 72123123            |
| ENSG00000256407 | 0.499066092 | 0           | protein_coding   | 1  | 54606897  | 54665746            |
| ENSG00000256420 | 0           | 0.390640832 | pseudogene       | 12 | 66957747  | 66962974            |
| ENSG00000256428 | 0.869158192 | 0.390640832 | processed_transc | 11 | 61535973  | 61558075            |
| ENSG00000256433 | 4.593635215 | 3.96493948  | lincRNA          | 12 | 6503071   | 6504235             |
| ENSG00000256436 | 0.499066092 | 1.353254395 | protein_coding   | 12 | 11182986  | 11184006 TAS2R31    |
| ENSG00000256439 | 2.671945279 | 2.971122874 | pseudogene       | 16 | 24930714  | 24932325            |
| ENSG00000256443 | 1.616589159 | 1.16600992  | lincRNA          | 11 | 61306988  | 61309731            |
| ENSG00000256448 | 1.16343121  | 1.925536307 | antisense        | 11 | 73116342  | 73121727            |
| ENSG00000256450 | 0           | 1.16600992  | pseudogene       | 12 | 16666379  | 16667305            |
| ENSG00000256452 | 1.407729925 | 0.950786998 | antisense        | 11 | 113688799 | 113693180           |
| ENSG00000256464 | 0.869158192 | 1.16600992  | pseudogene       | 11 | 18511790  | 18512502            |
| ENSG00000256465 | 0           | 0.390640832 | pseudogene       | 12 | 32046304  | 32046636            |
| ENSG00000256481 | 1.799000381 | 1.16600992  | antisense        | 11 | 63849162  | 63854647            |
| ENSG00000256482 | 0.499066092 | 0.950786998 | antisense        | 12 | 24983355  | 24989492            |
| ENSG00000256486 | 1.799000381 | 2.501982735 | processed_transc | 12 | 109541772 | 109545809           |
| ENSG00000256500 | 0           | 1.518964905 | protein_coding   | 14 | 104029299 | 104152261           |
| ENSG00000256511 | 0.499066092 | 0           | protein_coding   | 22 | 24951977  | 25006498            |
| ENSG00000256525 | 7.584540566 | 7.720473624 | protein_coding   | 17 | 62473904  | 62493184 POLG2      |
| ENSG00000256533 | 0           | 0.697730409 | pseudogene       | 11 | 114323786 | 114324845           |
| ENSG00000256537 | 1.960915222 | 2.788380093 | pseudogene       | 12 | 11323963  | 11324164            |
| ENSG00000256538 | 2.10647801  | 2.144285137 | lincRNA          | 12 | 34190373  | 34209675            |
| ENSG00000256540 | 3.78787645  | 1.16600992  | lincRNA          | 12 | 276022    | 291565              |
| ENSG00000256542 | 4.026095388 | 2.912743273 | antisense        | 12 | 132853935 | 132855447           |
| ENSG00000256546 | 5.806547963 | 6.104183162 | processed_transc | 12 | 122501212 | 122506522           |
| ENSG00000256557 | 0           | 0.390640832 | pseudogene       | 12 | 27761666  | 27761979            |
| ENSG00000256563 | 0.499066092 | 0.390640832 | pseudogene       | 12 | 133548963 | 133549383 NANOGNBP2 |
| ENSG00000256564 | 1.16343121  | 2.242360793 | antisense        | 12 | 16720345  | 16726874            |
| ENSG00000256571 | 0.499066092 | 0.390640832 | sense_intronic   | 12 | 64272567  | 64273254            |
| ENSG00000256576 | 2.762599152 | 3.133298822 | lincRNA          | 12 | 132671287 | 132674240           |
| ENSG00000256579 | 0.499066092 | 0           | pseudogene       | 16 | 34232106  | 34232469            |
| ENSG00000256588 | 0.499066092 | 0           | sense_intronic   | 11 | 18529155  | 18530367            |
| ENSG00000256589 | 0.499066092 | 0           | pseudogene       | 12 | 8407123   | 8461445             |
| ENSG00000256591 | 2.671945279 | 1.353254395 | protein_coding   | 11 | 61196692  | 61253294            |
| ENSG00000256594 | 2.238690726 | 2.579085888 | pseudogene       | 12 | 9806279   | 9809639             |
| ENSG00000256603 | 0           | 0.390640832 | antisense        | 11 | 113641115 | 113642413           |
| ENSG00000256604 | 0.499066092 | 0           | pseudogene       | 7  | 102120179 | 102121095 MIR4448   |
| ENSG00000256609 | 1.16343121  | 0.390640832 | antisense        | 12 | 119619853 | 119621064           |
| ENSG00000256612 | 0.869158192 | 0.697730409 | protein_coding   | 19 | 41430178  | 41455139            |
| ENSG00000256615 | 4.292665995 | 3.183544561 | antisense        | 12 | 21815247  | 21912966            |
| ENSG00000256618 | 1.960915222 | 3.133298822 | protein_coding   | 17 | 22022437  | 22023991 MTRNR2L1   |
| ENSG00000256625 | 0.499066092 | 1.518964905 | pseudogene       | 12 | 27274843  | 27300597            |
| ENSG00000256628 | 1.616589159 | 2.579085888 | protein_coding   | 3  | 101395274 | 101396431           |
| ENSG00000256629 | 1.16343121  | 0.697730409 | pseudogene       | 12 | 11332272  | 11333061            |
| ENSG00000256632 | 0           | 0.697730409 | protein_coding   | 12 | 133264635 | 133294706           |
| ENSG00000256633 | 0           | 0.390640832 | antisense        | 11 | 72295616  | 72299023            |
| ENSG00000256642 | 3.393122761 | 4.604259349 | protein_coding   | 16 | 33961052  | 33962503 LINC00273  |
| ENSG00000256650 | 0.499066092 | 0.697730409 | sense_intronic   | 12 | 15265297  | 15267632 RERG-IT1   |
| ENSG00000256651 | 0.499066092 | 0           | pseudogene       | 12 | 10983673  | 10984615            |
| ENSG00000256655 | 6.386460534 | 6.1803943   | protein_coding   | 8  | 128959126 | 128960591 TMEM75    |

|                 |             |             |                  |    |           |                   |
|-----------------|-------------|-------------|------------------|----|-----------|-------------------|
| ENSG00000256658 | 0.499066092 | 0           | antisense        | 12 | 12876231  | 12876945          |
| ENSG00000256663 | 6.032862302 | 5.647721597 | pseudogene       | 12 | 20704524  | 20705946          |
| ENSG00000256667 | 5.072559152 | 5.816437314 | pseudogene       | 12 | 10741077  | 10752434          |
| ENSG00000256670 | 0.499066092 | 0           | antisense        | 12 | 64992858  | 65003239          |
| ENSG00000256673 | 2.762599152 | 3.081239798 | pseudogene       | 12 | 9550951   | 9567447           |
| ENSG00000256674 | 0           | 0.950786998 | pseudogene       | 11 | 114453975 | 114455414         |
| ENSG00000256681 | 0           | 0.390640832 | pseudogene       | 11 | 73561514  | 73562256          |
| ENSG00000256682 | 1.16343121  | 0.950786998 | pseudogene       | 12 | 11047542  | 11048481 TAS2R12  |
| ENSG00000256683 | 7.549958459 | 8.323603978 | protein_coding   | 19 | 52467594  | 52490079 ZNF350   |
| ENSG00000256690 | 1.799000381 | 2.242360793 | antisense        | 11 | 62599706  | 62601515          |
| ENSG00000256694 | 3.335220907 | 1.667587519 | antisense        | 12 | 273830    | 275487            |
| ENSG00000256704 | 0.869158192 | 0.390640832 | pseudogene       | 18 | 57677224  | 57678291          |
| ENSG00000256705 | 0.499066092 | 0.950786998 | antisense        | 14 | 102299772 | 102305868         |
| ENSG00000256712 | 3.698846687 | 3.453019579 | sense_intronic   | 12 | 11318689  | 11323952          |
| ENSG00000256733 | 0           | 0.697730409 | lincRNA          | 11 | 60823209  | 60835007          |
| ENSG00000256734 | 1.16343121  | 0.950786998 | pseudogene       | 11 | 18471659  | 18472415          |
| ENSG00000256739 | 0.869158192 | 0.390640832 | antisense        | 11 | 72062391  | 72064254          |
| ENSG00000256742 | 0.499066092 | 0.697730409 | lincRNA          | 12 | 122018697 | 122031409         |
| ENSG00000256745 | 0.869158192 | 1.353254395 | pseudogene       | 11 | 93921615  | 93922163          |
| ENSG00000256746 | 0           | 1.16600992  | antisense        | 11 | 47292208  | 47293661          |
| ENSG00000256756 | 0.499066092 | 0           | pseudogene       | 12 | 17553333  | 17553848          |
| ENSG00000256762 | 0.499066092 | 0           | protein_coding   | 17 | 44076616  | 44077060 STH      |
| ENSG00000256771 | 6.275383355 | 6.403479675 | protein_coding   | 19 | 19976714  | 20004292 ZNF253   |
| ENSG00000256783 | 1.407729925 | 0.697730409 | lincRNA          | 12 | 133033746 | 133036610         |
| ENSG00000256789 | 0.499066092 | 0.390640832 | antisense        | 11 | 63405149  | 63426434          |
| ENSG00000256802 | 5.684325135 | 4.489113623 | antisense        | 15 | 29967194  | 29973161          |
| ENSG00000256812 | 0.869158192 | 0           | protein_coding   | 16 | 55600584  | 55601599 CAPNS2   |
| ENSG00000256824 | 0           | 1.16600992  | processed_transc | 11 | 63803442  | 63871125          |
| ENSG00000256825 | 0           | 0.390640832 | protein_coding   | 12 | 133707454 | 133778956         |
| ENSG00000256826 | 0           | 0.390640832 | pseudogene       | 17 | 62487640  | 62487906          |
| ENSG00000256827 | 1.16343121  | 0.390640832 | pseudogene       | 12 | 124490418 | 124490772         |
| ENSG00000256843 | 0.499066092 | 0           | pseudogene       | 12 | 31901034  | 31901174          |
| ENSG00000256849 | 0.499066092 | 0.390640832 | pseudogene       | 12 | 20094455  | 20095952          |
| ENSG00000256850 | 0.499066092 | 0.697730409 | processed_transc | 11 | 113560055 | 113657508         |
| ENSG00000256872 | 4.863159938 | 5.901455548 | protein_coding   | 22 | 38077680  | 38089483          |
| ENSG00000256875 | 0.869158192 | 1.518964905 | lincRNA          | 12 | 133038828 | 133039312         |
| ENSG00000256885 | 3.603959378 | 3.453019579 | pseudogene       | 11 | 95556681  | 95557336          |
| ENSG00000256889 | 0.499066092 | 0           | pseudogene       | 4  | 92949929  | 92950119          |
| ENSG00000256892 | 0.499066092 | 0           | protein_coding   | 10 | 37890366  | 37891859 MTRNR2L7 |
| ENSG00000256893 | 2.57521082  | 2.144285137 | antisense        | 12 | 13080661  | 13106891          |
| ENSG00000256894 | 3.146112541 | 2.851901313 | antisense        | 12 | 26278088  | 26279550          |
| ENSG00000256895 | 0.869158192 | 0.950786998 | protein_coding   | 21 | 16422510  | 16424692          |
| ENSG00000256897 | 2.10647801  | 2.971122874 | antisense        | 11 | 47241769  | 47243302          |
| ENSG00000256898 | 0.499066092 | 0.950786998 | pseudogene       | 11 | 73632710  | 73633241          |
| ENSG00000256905 | 0           | 0.390640832 | pseudogene       | 8  | 41818758  | 41820184          |
| ENSG00000256913 | 2.471521042 | 0.697730409 | pseudogene       | 12 | 6586880   | 6589373           |
| ENSG00000256915 | 0           | 0.390640832 | lincRNA          | 12 | 66038114  | 66057079          |
| ENSG00000256916 | 0           | 0.390640832 | antisense        | 11 | 102477647 | 102498801         |
| ENSG00000256940 | 2.847891871 | 3.813624741 | antisense        | 11 | 64013436  | 64015689          |
| ENSG00000256943 | 3.554067925 | 2.420525079 | antisense        | 12 | 132851977 | 132854915         |
| ENSG00000256947 | 0.499066092 | 0           | antisense        | 11 | 114081338 | 114227293         |
| ENSG00000256950 | 0           | 0.390640832 | protein_coding   | 12 | 122326692 | 122359376         |
| ENSG00000256955 | 1.960915222 | 0.390640832 | lincRNA          | 12 | 132341965 | 132348596         |
| ENSG00000256967 | 3.744048221 | 3.781359661 | antisense        | 12 | 7281675   | 7283794           |
| ENSG00000256972 | 0           | 0.950786998 | lincRNA          | 11 | 115204296 | 115210981         |
| ENSG00000256973 | 2.35979773  | 1.802319292 | lincRNA          | 12 | 22613453  | 22616848          |
| ENSG00000256975 | 0           | 0.390640832 | pseudogene       | 12 | 9658943   | 9661036           |
| ENSG00000256980 | 0.499066092 | 0           | protein_coding   | 6  | 73918593  | 73972919          |
| ENSG00000256981 | 1.799000381 | 1.802319292 | pseudogene       | 12 | 11311384  | 11312293 TAS2R18  |
| ENSG00000256984 | 2.10647801  | 2.144285137 | lincRNA          | 12 | 31165437  | 31168601          |
| ENSG00000256987 | 0           | 0.390640832 | pseudogene       | 12 | 32106823  | 32108202          |
| ENSG00000256988 | 0.499066092 | 0           | lincRNA          | 12 | 4915708   | 4917807           |
| ENSG00000257004 | 0.499066092 | 0.697730409 | lincRNA          | 12 | 12821916  | 12838009          |

|                 |             |             |                  |    |           |                       |
|-----------------|-------------|-------------|------------------|----|-----------|-----------------------|
| ENSG00000257006 | 0.499066092 | 0.390640832 | sense_intronic   | 12 | 19411205  | 19412877              |
| ENSG00000257017 | 1.16343121  | 0.697730409 | protein_coding   | 16 | 72088491  | 72094954 HP           |
| ENSG00000257020 | 0.869158192 | 0.950786998 | antisense        | 12 | 122337854 | 122338900             |
| ENSG00000257022 | 0.869158192 | 0.390640832 | antisense        | 12 | 21980144  | 22040891              |
| ENSG00000257023 | 0           | 0.697730409 | antisense        | 12 | 22762162  | 22777949              |
| ENSG00000257027 | 4.026095388 | 3.570966319 | sense_intronic   | 12 | 9811163   | 9814681               |
| ENSG00000257038 | 1.960915222 | 2.501982735 | antisense        | 11 | 73018280  | 73020406              |
| ENSG00000257043 | 0.499066092 | 0.390640832 | pseudogene       | 11 | 18686597  | 18687095              |
| ENSG00000257045 | 0           | 0.390640832 | antisense        | 2  | 200190033 | 200194085             |
| ENSG00000257052 | 0.499066092 | 1.802319292 | antisense        | 11 | 60674261  | 60677214              |
| ENSG00000257058 | 0           | 0.390640832 | antisense        | 11 | 62313471  | 62315171              |
| ENSG00000257067 | 0           | 0.390640832 | lincRNA          | 11 | 115803492 | 115813713             |
| ENSG00000257070 | 0           | 1.16600992  | pseudogene       | 11 | 113640382 | 113640716             |
| ENSG00000257078 | 0.499066092 | 0           | pseudogene       | 12 | 7148460   | 7148945               |
| ENSG00000257084 | 1.16343121  | 0           | antisense        | 12 | 7072409   | 7073610               |
| ENSG00000257086 | 2.471521042 | 2.788380093 | processed_transc | 11 | 64014411  | 64016966              |
| ENSG00000257093 | 9.087659294 | 8.845489995 | protein_coding   | 7  | 141356528 | 141401953 KIAA1147    |
| ENSG00000257097 | 1.616589159 | 1.353254395 | lincRNA          | 12 | 122880089 | 122885404             |
| ENSG00000257101 | 0.869158192 | 0.697730409 | pseudogene       | 11 | 113662188 | 113662474             |
| ENSG00000257103 | 9.839270931 | 9.650384052 | protein_coding   | 19 | 34663352  | 34720420 LSM14A       |
| ENSG00000257108 | 2.762599152 | 2.788380093 | protein_coding   | 16 | 616996    | 619495 NHLRC4         |
| ENSG00000257113 | 0.499066092 | 0.390640832 | pseudogene       | 12 | 74668732  | 74669011              |
| ENSG00000257114 | 3.603959378 | 4.566889334 | lincRNA          | 12 | 43086018  | 43110653              |
| ENSG00000257117 | 2.10647801  | 2.579085888 | processed_transc | 12 | 53902047  | 53902749              |
| ENSG00000257120 | 0.499066092 | 0           | antisense        | 14 | 30122015  | 30127122              |
| ENSG00000257121 | 1.799000381 | 0.390640832 | pseudogene       | 12 | 95494307  | 95494821              |
| ENSG00000257122 | 5.4452544   | 5.317302248 | pseudogene       | 16 | 22430090  | 22449036 RRN3P3       |
| ENSG00000257135 | 2.928422289 | 3.027231696 | processed_transc | 2  | 10588820  | 10591453              |
| ENSG00000257137 | 0.499066092 | 0.950786998 | processed_transc | 12 | 52599368  | 52604639              |
| ENSG00000257150 | 1.16343121  | 0.697730409 | pseudogene       | 12 | 96043031  | 96067775 PGAM1P5      |
| ENSG00000257151 | 6.652556929 | 6.619638408 | lincRNA          | 15 | 25277020  | 25281637              |
| ENSG00000257159 | 0.869158192 | 0.390640832 | pseudogene       | 12 | 58360841  | 58362182              |
| ENSG00000257167 | 4.800350936 | 5.840125386 | processed_transc | 12 | 98906751  | 98910200              |
| ENSG00000257169 | 0.499066092 | 0           | pseudogene       | 12 | 96780596  | 96780972              |
| ENSG00000257176 | 2.35979773  | 4.127774132 | antisense        | 12 | 29433351  | 29470781              |
| ENSG00000257178 | 0.499066092 | 0           | ncrna_host       | 17 | 46656992  | 46659621              |
| ENSG00000257185 | 0.499066092 | 1.518964905 | lincRNA          | 14 | 27278623  | 27305664              |
| ENSG00000257193 | 0.869158192 | 1.667587519 | lincRNA          | 12 | 104564173 | 104571437             |
| ENSG00000257194 | 0.499066092 | 2.039052734 | lincRNA          | 12 | 90501516  | 90506066              |
| ENSG00000257195 | 0.869158192 | 0.697730409 | pseudogene       | 12 | 93277549  | 93278476              |
| ENSG00000257196 | 0.499066092 | 0.390640832 | processed_transc | 12 | 94208912  | 94209885              |
| ENSG00000257199 | 0           | 0.390640832 | pseudogene       | 12 | 77377864  | 77378451              |
| ENSG00000257202 | 0.869158192 | 0.390640832 | antisense        | 12 | 102317188 | 102318497             |
| ENSG00000257210 | 0.499066092 | 0           | pseudogene       | 12 | 93517839  | 93518319              |
| ENSG00000257218 | 7.1740722   | 7.060432274 | protein_coding   | 12 | 120884241 | 120899389             |
| ENSG00000257219 | 1.407729925 | 2.721932731 | processed_transc | 12 | 76653619  | 76698911              |
| ENSG00000257221 | 1.16343121  | 0.390640832 | antisense        | 12 | 109022463 | 109035094             |
| ENSG00000257222 | 0.869158192 | 1.667587519 | antisense        | 12 | 102457133 | 102468598             |
| ENSG00000257225 | 0.499066092 | 0.697730409 | antisense        | 12 | 42853168  | 42859930              |
| ENSG00000257231 | 0.869158192 | 0.390640832 | pseudogene       | 12 | 114227347 | 114227612             |
| ENSG00000257239 | 0           | 0.697730409 | processed_transc | 12 | 42223700  | 42326394              |
| ENSG00000257242 | 2.762599152 | 2.501982735 | protein_coding   | 12 | 92378756  | 92536690              |
| ENSG00000257243 | 1.407729925 | 2.242360793 | pseudogene       | 12 | 49988931  | 49989471              |
| ENSG00000257246 | 1.960915222 | 1.518964905 | pseudogene       | 12 | 51518411  | 51519164              |
| ENSG00000257252 | 0           | 0.390640832 | antisense        | 12 | 93710911  | 93771512              |
| ENSG00000257256 | 0.869158192 | 0           | antisense        | 12 | 50613387  | 50623767              |
| ENSG00000257261 | 3.78787645  | 3.183544561 | processed_transc | 12 | 46777462  | 46850051              |
| ENSG00000257262 | 0.499066092 | 0           | lincRNA          | 12 | 30353916  | 30370849              |
| ENSG00000257265 | 0.499066092 | 0           | processed_transc | 12 | 71401553  | 71425863              |
| ENSG00000257267 | 7.549958459 | 7.784953917 | pseudogene       | 18 | 32870246  | 32890730 ZNF271       |
| ENSG00000257270 | 3.744048221 | 3.845183986 | antisense        | 14 | 105934130 | 105936954             |
| ENSG00000257271 | 0.499066092 | 0           | antisense        | 11 | 126413842 | 126480843 KIRREL3-AS1 |
| ENSG00000257272 | 0.499066092 | 0           | lincRNA          | 14 | 36343063  | 36344509              |

|                 |             |             |                  |    |           |                  |
|-----------------|-------------|-------------|------------------|----|-----------|------------------|
| ENSG00000257279 | 1.616589159 | 0.950786998 | antisense        | 12 | 117415247 | 117425142        |
| ENSG00000257283 | 1.407729925 | 0.697730409 | antisense        | 12 | 94288741  | 94337379         |
| ENSG00000257285 | 2.762599152 | 3.183544561 | antisense        | 14 | 23398818  | 23424771         |
| ENSG00000257291 | 1.960915222 | 0.950786998 | antisense        | 12 | 50552484  | 50556731         |
| ENSG00000257298 | 3.554067925 | 2.501982735 | non_coding       | 12 | 50579363  | 50585146         |
| ENSG00000257302 | 0.499066092 | 0.390640832 | pseudogene       | 12 | 71065698  | 71066636 FAHD2P1 |
| ENSG00000257303 | 1.960915222 | 1.667587519 | antisense        | 12 | 56693926  | 56708592         |
| ENSG00000257307 | 1.616589159 | 2.501982735 | pseudogene       | 14 | 36350207  | 36350915         |
| ENSG00000257310 | 1.16343121  | 2.242360793 | lincRNA          | 14 | 19740033  | 19742744         |
| ENSG00000257315 | 4.883502971 | 5.112089758 | protein_coding   | 1  | 203765437 | 203769686 ZBED6  |
| ENSG00000257316 | 0.499066092 | 1.518964905 | pseudogene       | 12 | 33138772  | 33140004         |
| ENSG00000257327 | 0           | 0.390640832 | protein_coding   | 12 | 104235229 | 104238442        |
| ENSG00000257329 | 0.869158192 | 0           | processed_transc | 12 | 76358220  | 76360842         |
| ENSG00000257335 | 6.407685389 | 7.408200217 | protein_coding   | 7  | 141607613 | 141806547 MGAM   |
| ENSG00000257337 | 6.343050432 | 5.361622823 | antisense        | 12 | 53408380  | 53448222         |
| ENSG00000257341 | 0.499066092 | 0           | protein_coding   | 14 | 105953536 | 105958604        |
| ENSG00000257345 | 0           | 0.390640832 | lincRNA          | 12 | 93396903  | 93413596         |
| ENSG00000257346 | 0           | 0.390640832 | antisense        | 12 | 49483991  | 49487095         |
| ENSG00000257354 | 2.35979773  | 2.788380093 | antisense        | 12 | 62996532  | 63007855         |
| ENSG00000257365 | 4.800350936 | 5.045726316 | protein_coding   | 14 | 65453438  | 65529368 FNTB    |
| ENSG00000257376 | 0.499066092 | 0           | pseudogene       | 12 | 42825467  | 42827159         |
| ENSG00000257390 | 0.869158192 | 0           | protein_coding   | 12 | 56151059  | 56221330         |
| ENSG00000257391 | 1.616589159 | 0.390640832 | ncrna_host       | 16 | 15248760  | 15250877         |
| ENSG00000257403 | 0.869158192 | 1.16600992  | pseudogene       | 16 | 21358460  | 21363459         |
| ENSG00000257410 | 3.652182994 | 2.144285137 | processed_transc | 12 | 72187635  | 72193407         |
| ENSG00000257433 | 1.16343121  | 1.353254395 | lincRNA          | 12 | 48099868  | 48136077         |
| ENSG00000257443 | 1.16343121  | 0.390640832 | antisense        | 12 | 59314420  | 59458019         |
| ENSG00000257445 | 0.869158192 | 0.390640832 | processed_transc | 12 | 77252003  | 77261963         |
| ENSG00000257446 | 5.538004898 | 4.744751758 | protein_coding   | 19 | 12154620  | 12163754 ZNF878  |
| ENSG00000257449 | 0           | 0.390640832 | antisense        | 12 | 56423433  | 56435590         |
| ENSG00000257452 | 0           | 0.390640832 | antisense        | 12 | 113345433 | 113455556        |
| ENSG00000257453 | 0.499066092 | 0           | processed_transc | 12 | 76424274  | 76425158         |
| ENSG00000257464 | 0.869158192 | 0.950786998 | pseudogene       | 12 | 49836207  | 49836435         |
| ENSG00000257474 | 0.869158192 | 0.697730409 | non_coding       | 12 | 79933983  | 79944315         |
| ENSG00000257475 | 2.762599152 | 2.971122874 | non_coding       | 12 | 53405880  | 53407705         |
| ENSG00000257477 | 0           | 0.390640832 | processed_transc | 12 | 54822087  | 54823187         |
| ENSG00000257479 | 5.91922012  | 6.293387477 | lincRNA          | 12 | 53551573  | 53570212         |
| ENSG00000257480 | 0           | 0.390640832 | pseudogene       | 12 | 90146690  | 90147608 MRPL2P1 |
| ENSG00000257488 | 0.499066092 | 0           | lincRNA          | 12 | 48220637  | 48231681         |
| ENSG00000257489 | 2.57521082  | 2.579085888 | pseudogene       | 12 | 100566974 | 100593561        |
| ENSG00000257496 | 0           | 0.697730409 | processed_transc | 12 | 46778016  | 46780774         |
| ENSG00000257497 | 3.146112541 | 2.579085888 | processed_transc | 12 | 75877904  | 75883600         |
| ENSG00000257499 | 0.869158192 | 1.353254395 | 3prime_overlapp  | 12 | 58117572  | 58119448         |
| ENSG00000257500 | 0.499066092 | 0           | antisense        | 12 | 52801364  | 52822278         |
| ENSG00000257507 | 0.499066092 | 0.390640832 | processed_transc | 12 | 69843250  | 69854504         |
| ENSG00000257509 | 1.616589159 | 0.950786998 | non_coding       | 12 | 56155334  | 56156412         |
| ENSG00000257511 | 3.78787645  | 2.912743273 | pseudogene       | 12 | 32879317  | 32880321         |
| ENSG00000257512 | 2.10647801  | 0.390640832 | pseudogene       | 12 | 93708585  | 93709717         |
| ENSG00000257513 | 0           | 0.390640832 | protein_coding   | 18 | 11619508  | 11639698         |
| ENSG00000257523 | 0           | 0.390640832 | lincRNA          | 14 | 29445042  | 29448130         |
| ENSG00000257524 | 0           | 2.501982735 | processed_transc | 9  | 130630143 | 130649066        |
| ENSG00000257531 | 4.261916566 | 2.144285137 | pseudogene       | 12 | 50611445  | 50614726         |
| ENSG00000257534 | 1.960915222 | 1.925536307 | lincRNA          | 12 | 54555849  | 54558236         |
| ENSG00000257539 | 0           | 0.697730409 | pseudogene       | 12 | 111819672 | 111823442        |
| ENSG00000257543 | 1.16343121  | 1.16600992  | lincRNA          | 12 | 101802150 | 101802838        |
| ENSG00000257545 | 0.499066092 | 0.950786998 | protein_coding   | 12 | 106889736 | 107168696        |
| ENSG00000257550 | 1.16343121  | 0.950786998 | ncrna_host       | 12 | 53907768  | 53911392         |
| ENSG00000257556 | 3.502389126 | 2.039052734 | lincRNA          | 14 | 105559946 | 105565341        |
| ENSG00000257557 | 1.960915222 | 2.242360793 | antisense        | 12 | 80328681  | 80334448         |
| ENSG00000257568 | 0.499066092 | 0.390640832 | antisense        | 12 | 62876129  | 62878712         |
| ENSG00000257569 | 0.499066092 | 0           | pseudogene       | 12 | 56294084  | 56294402 GSTP1P1 |
| ENSG00000257573 | 1.799000381 | 2.579085888 | pseudogene       | 14 | 19719550  | 19720595         |
| ENSG00000257576 | 1.960915222 | 1.925536307 | pseudogene       | 12 | 56904786  | 56906487         |



|                 |             |             |                  |    |           |           |           |
|-----------------|-------------|-------------|------------------|----|-----------|-----------|-----------|
| ENSG00000257591 | 3.744048221 | 3.748356452 | protein_coding   | 19 | 12251032  | 12267546  |           |
| ENSG00000257594 | 1.960915222 | 2.039052734 | protein_coding   | 12 | 89913185  | 89918583  | GALNT4    |
| ENSG00000257595 | 0.499066092 | 0.697730409 | lincRNA          | 12 | 111807086 | 111841114 |           |
| ENSG00000257596 | 2.238690726 | 3.87606762  | antisense        | 12 | 54656399  | 54672847  |           |
| ENSG00000257605 | 2.35979773  | 3.133298822 | processed_transc | 12 | 53692449  | 53694098  |           |
| ENSG00000257606 | 1.616589159 | 1.925536307 | protein_coding   | 12 | 113836320 | 113864106 |           |
| ENSG00000257611 | 0.499066092 | 0           | pseudogene       | 12 | 106563782 | 106566215 |           |
| ENSG00000257613 | 1.16343121  | 0.950786998 | processed_transc | 12 | 70612912  | 70615642  |           |
| ENSG00000257621 | 8.635777795 | 8.794871435 | processed_transc | 14 | 58732083  | 58764852  |           |
| ENSG00000257639 | 0.499066092 | 0           | pseudogene       | 16 | 21544266  | 21561694  |           |
| ENSG00000257642 | 0           | 0.390640832 | antisense        | 12 | 105698645 | 105720795 |           |
| ENSG00000257643 | 0.499066092 | 0           | pseudogene       | 12 | 32845438  | 32845782  |           |
| ENSG00000257647 | 2.671945279 | 2.912743273 | lincRNA          | 15 | 25272883  | 25277194  |           |
| ENSG00000257649 | 0           | 0.390640832 | pseudogene       | 12 | 52622877  | 52623372  |           |
| ENSG00000257654 | 4.062237333 | 2.912743273 | lincRNA          | 12 | 117136141 | 117140935 |           |
| ENSG00000257658 | 0.499066092 | 0           | pseudogene       | 12 | 112759563 | 112760893 |           |
| ENSG00000257660 | 0           | 1.16600992  | lincRNA          | 12 | 49182930  | 49184318  |           |
| ENSG00000257666 | 0.499066092 | 0.697730409 | pseudogene       | 12 | 95680094  | 95680614  | CBX3P5    |
| ENSG00000257667 | 0.499066092 | 0.390640832 | processed_transc | 7  | 27202219  | 27214799  |           |
| ENSG00000257671 | 7.165790811 | 6.304782526 | processed_transc | 12 | 52638832  | 52641232  |           |
| ENSG00000257674 | 0           | 0.950786998 | pseudogene       | 12 | 42680713  | 42682362  |           |
| ENSG00000257675 | 1.16343121  | 0.697730409 | pseudogene       | 12 | 53142560  | 53143911  |           |
| ENSG00000257681 | 1.799000381 | 2.242360793 | antisense        | 12 | 104140093 | 104162636 |           |
| ENSG00000257692 | 0.869158192 | 0           | antisense        | 14 | 71394182  | 71693933  |           |
| ENSG00000257696 | 0           | 0.390640832 | antisense        | 12 | 100536836 | 100538449 |           |
| ENSG00000257698 | 5.729976786 | 6.847095496 | processed_transc | 12 | 58325311  | 58329958  |           |
| ENSG00000257702 | 0.869158192 | 0.950786998 | antisense        | 2  | 74729722  | 74731744  |           |
| ENSG00000257704 | 5.223818625 | 4.888000647 | protein_coding   | 19 | 47777710  | 47778964  | PRR24     |
| ENSG00000257718 | 1.960915222 | 2.652276565 | antisense        | 12 | 39300253  | 39303394  |           |
| ENSG00000257727 | 5.774228067 | 6.485878328 | protein_coding   | 12 | 56703626  | 56710120  | CNPY2     |
| ENSG00000257732 | 5.346128795 | 4.363974406 | antisense        | 12 | 104656092 | 104674500 |           |
| ENSG00000257740 | 2.10647801  | 2.039052734 | antisense        | 12 | 56702652  | 56703233  |           |
| ENSG00000257742 | 6.96088487  | 6.510691757 | lincRNA          | 12 | 44112796  | 44117803  |           |
| ENSG00000257743 | 0           | 0.390640832 | protein_coding   | 7  | 141811549 | 141921088 |           |
| ENSG00000257752 | 0.499066092 | 1.353254395 | pseudogene       | 12 | 88451653  | 88452355  |           |
| ENSG00000257754 | 0           | 0.390640832 | antisense        | 12 | 104213388 | 104215863 |           |
| ENSG00000257755 | 1.616589159 | 1.802319292 | protein_coding   | 12 | 50506037  | 50517565  |           |
| ENSG00000257758 | 0           | 0.390640832 | pseudogene       | 12 | 105370527 | 105371805 | KRT18P20  |
| ENSG00000257759 | 0.499066092 | 0.697730409 | lincRNA          | 14 | 70892529  | 71014181  |           |
| ENSG00000257760 | 0           | 0.390640832 | processed_transc | 12 | 110906085 | 110907073 |           |
| ENSG00000257763 | 0.499066092 | 0.390640832 | pseudogene       | 12 | 48749575  | 48750397  |           |
| ENSG00000257769 | 0           | 0.390640832 | antisense        | 16 | 15702331  | 15704420  |           |
| ENSG00000257773 | 0.869158192 | 0.390640832 | pseudogene       | 12 | 106409675 | 106410784 | ST13P3    |
| ENSG00000257790 | 1.799000381 | 2.144285137 | pseudogene       | 12 | 53547056  | 53548268  |           |
| ENSG00000257800 | 3.393122761 | 3.279072565 | pseudogene       | 2  | 74347807  | 74350345  |           |
| ENSG00000257802 | 0.499066092 | 0.697730409 | pseudogene       | 12 | 72243008  | 72244208  | MRS2P2    |
| ENSG00000257803 | 1.16343121  | 0.390640832 | pseudogene       | 12 | 100972561 | 100973973 |           |
| ENSG00000257808 | 0           | 0.697730409 | lincRNA          | 12 | 53553370  | 53554784  |           |
| ENSG00000257815 | 3.211941663 | 3.935919592 | processed_transc | 12 | 70297813  | 70637140  |           |
| ENSG00000257818 | 0.499066092 | 0.950786998 | pseudogene       | 12 | 69678177  | 69679265  |           |
| ENSG00000257829 | 0.869158192 | 0.697730409 | processed_transc | 12 | 52700400  | 52702155  |           |
| ENSG00000257830 | 1.16343121  | 0.697730409 | processed_transc | 12 | 52668431  | 52672940  |           |
| ENSG00000257831 | 1.16343121  | 1.353254395 | antisense        | 14 | 31717834  | 31771945  |           |
| ENSG00000257842 | 2.671945279 | 3.608232228 | antisense        | 14 | 27067618  | 27275673  | NOVA1-AS1 |
| ENSG00000257845 | 0.499066092 | 0.697730409 | lincRNA          | 14 | 27244701  | 27291313  |           |
| ENSG00000257849 | 0           | 0.697730409 | lincRNA          | 12 | 43359925  | 43361156  |           |
| ENSG00000257851 | 1.616589159 | 0.390640832 | pseudogene       | 12 | 52106253  | 52107390  |           |
| ENSG00000257859 | 0           | 0.697730409 | lincRNA          | 12 | 106097981 | 106137840 |           |
| ENSG00000257864 | 1.16343121  | 0.390640832 | pseudogene       | 12 | 44642215  | 44642787  |           |
| ENSG00000257875 | 0.499066092 | 0.950786998 | pseudogene       | 12 | 82862235  | 82862727  |           |
| ENSG00000257883 | 6.138202758 | 5.683080141 | lincRNA          | 12 | 117099387 | 117135870 |           |
| ENSG00000257884 | 0.499066092 | 0           | pseudogene       | 14 | 20145996  | 20148258  |           |
| ENSG00000257886 | 0.869158192 | 0           | antisense        | 12 | 105466264 | 105467799 |           |

|                 |             |             |                  |    |           |                    |
|-----------------|-------------|-------------|------------------|----|-----------|--------------------|
| ENSG00000257890 | 0.499066092 | 0           | lincRNA          | 12 | 106444739 | 106452032          |
| ENSG00000257894 | 1.16343121  | 0.697730409 | lincRNA          | 12 | 79734985  | 79897176           |
| ENSG00000257896 | 2.35979773  | 2.144285137 | pseudogene       | 12 | 44130431  | 44134870           |
| ENSG00000257898 | 4.381167248 | 6.349483465 | non_coding       | 14 | 19687688  | 19887497           |
| ENSG00000257903 | 1.407729925 | 0.697730409 | pseudogene       | 14 | 19718326  | 19759003           |
| ENSG00000257906 | 1.16343121  | 0.390640832 | lincRNA          | 12 | 47808791  | 47813962           |
| ENSG00000257907 | 2.10647801  | 2.039052734 | pseudogene       | 12 | 44053673  | 44054897 EEF1A1P17 |
| ENSG00000257910 | 0.499066092 | 0.697730409 | processed_transc | 12 | 77271973  | 77274132           |
| ENSG00000257913 | 4.230497448 | 3.96493948  | antisense        | 12 | 49392150  | 49412988           |
| ENSG00000257918 | 0           | 0.390640832 | processed_transc | 12 | 107108702 | 107126844          |
| ENSG00000257923 | 10.56423086 | 10.04501038 | protein_coding   | 7  | 101459219 | 101927250 CUX1     |
| ENSG00000257924 | 0.499066092 | 0.697730409 | lincRNA          | 12 | 47747537  | 47763718           |
| ENSG00000257925 | 1.407729925 | 0.390640832 | antisense        | 12 | 47631517  | 47672804           |
| ENSG00000257927 | 0           | 0.390640832 | pseudogene       | 12 | 43447892  | 43448189 MRPS36P5  |
| ENSG00000257941 | 1.407729925 | 1.518964905 | pseudogene       | 12 | 76451318  | 76451895           |
| ENSG00000257950 | 5.141750194 | 5.32851069  | protein_coding   | 17 | 3566357   | 3599488            |
| ENSG00000257953 | 0.869158192 | 0.950786998 | antisense        | 12 | 58230875  | 58236528           |
| ENSG00000257954 | 0.499066092 | 1.802319292 | pseudogene       | 12 | 49783299  | 49783945           |
| ENSG00000257956 | 0           | 0.697730409 | pseudogene       | 12 | 79952562  | 79952946           |
| ENSG00000257957 | 1.16343121  | 1.667587519 | pseudogene       | 14 | 36235001  | 36236316           |
| ENSG00000257960 | 0.499066092 | 0.697730409 | lincRNA          | 12 | 49672836  | 49676768           |
| ENSG00000257964 | 2.10647801  | 1.925536307 | antisense        | 12 | 49970623  | 49971288           |
| ENSG00000257966 | 0.499066092 | 0           | pseudogene       | 12 | 56263832  | 56266386           |
| ENSG00000257979 | 0.869158192 | 0.950786998 | pseudogene       | 12 | 116606850 | 116607063          |
| ENSG00000257985 | 0.499066092 | 0           | antisense        | 12 | 48405087  | 48419252           |
| ENSG00000257999 | 0           | 0.697730409 | antisense        | 12 | 105496250 | 105500957          |
| ENSG00000258001 | 1.16343121  | 0.697730409 | lincRNA          | 12 | 57824899  | 57827718           |
| ENSG00000258010 | 0.499066092 | 0.390640832 | antisense        | 15 | 80726136  | 80737493           |
| ENSG00000258011 | 2.238690726 | 0.390640832 | pseudogene       | 12 | 110867767 | 110868088 HMGA1P3  |
| ENSG00000258012 | 0.499066092 | 0.950786998 | pseudogene       | 12 | 93251855  | 93253049           |
| ENSG00000258017 | 0.869158192 | 1.16600992  | antisense        | 12 | 49521565  | 49541652           |
| ENSG00000258021 | 0           | 0.390640832 | pseudogene       | 12 | 52294349  | 52295120           |
| ENSG00000258033 | 0           | 0.697730409 | pseudogene       | 12 | 101460512 | 101463010          |
| ENSG00000258034 | 1.16343121  | 0           | antisense        | 12 | 116398992 | 116400538          |
| ENSG00000258040 | 0.499066092 | 0           | pseudogene       | 7  | 101805576 | 101806076          |
| ENSG00000258044 | 0           | 1.16600992  | non_coding       | 12 | 80217558  | 80219276           |
| ENSG00000258048 | 0.869158192 | 0.697730409 | lincRNA          | 12 | 80083924  | 80172231           |
| ENSG00000258053 | 1.799000381 | 0           | protein_coding   | 12 | 71441182  | 71512027           |
| ENSG00000258056 | 5.124761037 | 5.808454063 | antisense        | 12 | 56122888  | 56124467           |
| ENSG00000258057 | 3.448790144 | 4.250702764 | antisense        | 12 | 50222325  | 50234926           |
| ENSG00000258077 | 0.499066092 | 0.697730409 | processed_transc | 12 | 75956982  | 76377795           |
| ENSG00000258081 | 0           | 0.697730409 | lincRNA          | 14 | 27305934  | 27930810           |
| ENSG00000258082 | 1.16343121  | 0           | processed_transc | 1  | 235115394 | 235116551          |
| ENSG00000258086 | 0.869158192 | 2.420525079 | processed_transc | 12 | 54747576  | 54860769           |
| ENSG00000258088 | 1.407729925 | 0.390640832 | processed_transc | 12 | 76087790  | 76092596           |
| ENSG00000258090 | 0.499066092 | 0.390640832 | pseudogene       | 12 | 77150971  | 77151694           |
| ENSG00000258093 | 0           | 0.697730409 | pseudogene       | 7  | 101831879 | 101832108          |
| ENSG00000258096 | 1.16343121  | 1.518964905 | processed_transc | 12 | 46765246  | 46767561           |
| ENSG00000258099 | 0           | 1.353254395 | antisense        | 12 | 112037302 | 112038060          |
| ENSG00000258101 | 1.960915222 | 2.971122874 | antisense        | 12 | 49627352  | 49658539           |
| ENSG00000258102 | 1.16343121  | 0.697730409 | processed_transc | 12 | 116985911 | 116992186          |
| ENSG00000258104 | 0           | 0.697730409 | pseudogene       | 12 | 50013117  | 50013395 HIGD1AP9  |
| ENSG00000258111 | 0.499066092 | 0           | pseudogene       | 12 | 104907807 | 104908217          |
| ENSG00000258112 | 0.499066092 | 0           | pseudogene       | 12 | 75651415  | 75652414           |
| ENSG00000258115 | 0           | 0.390640832 | processed_transc | 12 | 72439929  | 72451157           |
| ENSG00000258116 | 0.499066092 | 1.353254395 | pseudogene       | 12 | 47735397  | 47735872           |
| ENSG00000258122 | 1.16343121  | 0.950786998 | processed_transc | 16 | 66875336  | 66887351           |
| ENSG00000258128 | 0           | 0.390640832 | pseudogene       | 12 | 88176897  | 88178337 MKRN9P    |
| ENSG00000258130 | 0.869158192 | 0.390640832 | protein_coding   | 16 | 30215637  | 30220392           |
| ENSG00000258133 | 0           | 0.697730409 | pseudogene       | 12 | 58788379  | 58788921           |
| ENSG00000258134 | 0.869158192 | 0.950786998 | pseudogene       | 12 | 32380344  | 32381088           |
| ENSG00000258136 | 1.407729925 | 1.802319292 | processed_transc | 12 | 108130332 | 108153745          |
| ENSG00000258137 | 1.407729925 | 1.16600992  | processed_transc | 12 | 54747445  | 54891472           |

|                 |             |             |                  |    |           |           |           |
|-----------------|-------------|-------------|------------------|----|-----------|-----------|-----------|
| ENSG00000258142 | 0           | 0.390640832 | pseudogene       | 12 | 102623805 | 102624331 |           |
| ENSG00000258150 | 0           | 0.390640832 | protein_coding   | 16 | 29476288  | 29479154  |           |
| ENSG00000258153 | 0           | 0.390640832 | pseudogene       | 12 | 102267094 | 102267401 |           |
| ENSG00000258168 | 2.671945279 | 2.242360793 | antisense        | 12 | 70861860  | 70932859  |           |
| ENSG00000258172 | 0.499066092 | 0.390640832 | antisense        | 12 | 94665926  | 94670971  |           |
| ENSG00000258175 | 0.499066092 | 0           | lincRNA          | 14 | 29061429  | 29082829  |           |
| ENSG00000258177 | 0           | 0.390640832 | processed_transc | 12 | 96616575  | 96617751  |           |
| ENSG00000258179 | 0.499066092 | 0.390640832 | pseudogene       | 12 | 88214431  | 88214695  |           |
| ENSG00000258181 | 1.799000381 | 1.925536307 | lincRNA          | 12 | 47641907  | 47651322  |           |
| ENSG00000258183 | 0.869158192 | 1.353254395 | lincRNA          | 12 | 90674671  | 90694117  |           |
| ENSG00000258186 | 2.238690726 | 2.039052734 | pseudogene       | 16 | 21531021  | 21531686  | SLC7A5P2  |
| ENSG00000258188 | 2.238690726 | 4.17820932  | non_coding       | 14 | 19812176  | 19859970  |           |
| ENSG00000258189 | 2.671945279 | 2.721932731 | non_coding       | 12 | 112931776 | 112934975 |           |
| ENSG00000258199 | 4.618121645 | 4.250702764 | non_coding       | 12 | 56556143  | 56584068  |           |
| ENSG00000258204 | 0.499066092 | 0           | pseudogene       | 12 | 99188263  | 99188742  |           |
| ENSG00000258210 | 1.616589159 | 1.353254395 | protein_coding   | 12 | 110825268 | 110883353 |           |
| ENSG00000258216 | 0.499066092 | 0           | lincRNA          | 12 | 90276442  | 90383066  |           |
| ENSG00000258225 | 0           | 0.390640832 | processed_transc | 12 | 78445961  | 78485517  |           |
| ENSG00000258230 | 0.869158192 | 0.390640832 | pseudogene       | 12 | 102166892 | 102167199 |           |
| ENSG00000258232 | 0.499066092 | 0.390640832 | antisense        | 12 | 49658939  | 49667089  |           |
| ENSG00000258240 | 0.869158192 | 0           | lincRNA          | 12 | 111389487 | 111395616 |           |
| ENSG00000258242 | 2.847891871 | 3.532712221 | processed_transc | 22 | 46409486  | 46411378  |           |
| ENSG00000258245 | 1.407729925 | 1.16600992  | pseudogene       | 12 | 76082574  | 76082876  |           |
| ENSG00000258256 | 0           | 0.390640832 | protein_coding   | 8  | 86134675  | 86157946  |           |
| ENSG00000258260 | 0.499066092 | 0.390640832 | antisense        | 12 | 56661577  | 56663888  |           |
| ENSG00000258272 | 0.869158192 | 0           | processed_transc | 12 | 96816104  | 96879220  |           |
| ENSG00000258279 | 0           | 0.390640832 | processed_transc | 12 | 52604714  | 52615812  |           |
| ENSG00000258282 | 0           | 0.697730409 | pseudogene       | 14 | 29142445  | 29142933  | BTF3P2    |
| ENSG00000258284 | 0.499066092 | 0.950786998 | pseudogene       | 12 | 49987874  | 49988041  | POLR2KP1  |
| ENSG00000258285 | 0.869158192 | 0.390640832 | lincRNA          | 12 | 117537286 | 117579896 |           |
| ENSG00000258289 | 7.81647827  | 7.830998152 | protein_coding   | 14 | 65381079  | 65411309  | CHURC1    |
| ENSG00000258290 | 0.499066092 | 0.390640832 | pseudogene       | 12 | 90313214  | 90313553  |           |
| ENSG00000258292 | 0           | 0.390640832 | protein_coding   | 12 | 96196875  | 96217085  |           |
| ENSG00000258297 | 7.269909329 | 7.029859489 | antisense        | 11 | 66433507  | 66435845  |           |
| ENSG00000258301 | 4.863159938 | 5.09905904  | lincRNA          | 14 | 77248083  | 77253067  |           |
| ENSG00000258302 | 2.847891871 | 2.788380093 | 3prime_overlapp  | 12 | 89954906  | 89987798  |           |
| ENSG00000258303 | 0.499066092 | 0.390640832 | processed_transc | 12 | 94229943  | 94231814  |           |
| ENSG00000258308 | 0           | 0.390640832 | lincRNA          | 12 | 102348776 | 102356168 |           |
| ENSG00000258311 | 3.603959378 | 3.133298822 | protein_coding   | 12 | 56109820  | 56118487  |           |
| ENSG00000258315 | 3.393122761 | 4.17820932  | protein_coding   | 17 | 6917814   | 6920844   |           |
| ENSG00000258317 | 1.616589159 | 1.925536307 | antisense        | 12 | 56513817  | 56523403  |           |
| ENSG00000258323 | 0           | 0.390640832 | processed_transc | 12 | 112501713 | 112503559 |           |
| ENSG00000258325 | 0.869158192 | 0.390640832 | antisense        | 12 | 2906043   | 2922068   |           |
| ENSG00000258331 | 0.499066092 | 0.390640832 | lincRNA          | 12 | 43549118  | 43556913  |           |
| ENSG00000258334 | 2.35979773  | 1.518964905 | antisense        | 12 | 49686414  | 49718359  |           |
| ENSG00000258337 | 0.499066092 | 0           | non_coding       | 12 | 116612307 | 116619100 |           |
| ENSG00000258343 | 1.407729925 | 0.390640832 | processed_transc | 12 | 96189123  | 96252617  |           |
| ENSG00000258344 | 0           | 1.518964905 | non_coding       | 12 | 54670415  | 54738867  |           |
| ENSG00000258351 | 2.57521082  | 1.353254395 | processed_transc | 12 | 53863570  | 53864527  |           |
| ENSG00000258352 | 0.869158192 | 0.697730409 | pseudogene       | 12 | 47529281  | 47532153  |           |
| ENSG00000258354 | 0           | 0.390640832 | ncrna_host       | 16 | 15003744  | 15005202  | MIR3180-1 |
| ENSG00000258355 | 0.499066092 | 1.16600992  | processed_transc | 12 | 106639391 | 106640734 |           |
| ENSG00000258357 | 0.499066092 | 0           | pseudogene       | 12 | 94914866  | 94915645  |           |
| ENSG00000258359 | 0           | 1.16600992  | pseudogene       | 12 | 112107656 | 112108166 |           |
| ENSG00000258365 | 2.10647801  | 2.579085888 | protein_coding   | 12 | 94671534  | 94676620  |           |
| ENSG00000258366 | 4.543379137 | 4.903073497 | protein_coding   | 20 | 62289163  | 62328416  |           |
| ENSG00000258368 | 0           | 0.390640832 | pseudogene       | 12 | 37969251  | 37970186  |           |
| ENSG00000258373 | 0           | 0.390640832 | pseudogene       | 12 | 112430800 | 112431679 |           |
| ENSG00000258376 | 6.086493765 | 5.953060722 | antisense        | 14 | 73710726  | 73712687  |           |
| ENSG00000258378 | 1.799000381 | 1.518964905 | antisense        | 14 | 58865275  | 58893843  |           |
| ENSG00000258382 | 1.407729925 | 1.518964905 | processed_transc | 15 | 93331144  | 93331702  |           |
| ENSG00000258383 | 1.16343121  | 0.697730409 | non_coding       | 14 | 99791136  | 99798352  |           |
| ENSG00000258384 | 0.869158192 | 2.144285137 | antisense        | 15 | 91495469  | 91498455  |           |

|                 |             |             |                  |    |           |                   |
|-----------------|-------------|-------------|------------------|----|-----------|-------------------|
| ENSG00000258386 | 0           | 0.390640832 | protein_coding   | 14 | 32476108  | 32487891          |
| ENSG00000258388 | 3.146112541 | 3.608232228 | protein_coding   | 6  | 32121622  | 32139755          |
| ENSG00000258391 | 0           | 0.697730409 | lincRNA          | 14 | 50508361  | 50519629          |
| ENSG00000258395 | 2.238690726 | 2.420525079 | antisense        | 2  | 113998307 | 113998987         |
| ENSG00000258398 | 1.16343121  | 1.353254395 | antisense        | 14 | 51350294  | 51353947          |
| ENSG00000258401 | 0           | 0.390640832 | pseudogene       | 14 | 49840684  | 49841101          |
| ENSG00000258402 | 0.499066092 | 0.390640832 | lincRNA          | 14 | 76747286  | 76776409          |
| ENSG00000258404 | 0           | 0.697730409 | lincRNA          | 14 | 102100791 | 102197445         |
| ENSG00000258405 | 7.612231145 | 7.465168131 | protein_coding   | 19 | 52956829  | 53020131 ZNF578   |
| ENSG00000258408 | 0.869158192 | 0.697730409 | pseudogene       | 14 | 74005925  | 74006485 NT5CP2   |
| ENSG00000258410 | 3.004694206 | 2.788380093 | lincRNA          | 15 | 20333998  | 20353206          |
| ENSG00000258412 | 1.616589159 | 0.390640832 | non_coding       | 14 | 96677197  | 96681155          |
| ENSG00000258413 | 0           | 0.390640832 | lincRNA          | 14 | 55729485  | 55738793          |
| ENSG00000258414 | 0           | 0.697730409 | processed_transc | 14 | 38033252  | 38048330          |
| ENSG00000258416 | 0.499066092 | 0.390640832 | lincRNA          | 14 | 80359423  | 80440512          |
| ENSG00000258424 | 2.238690726 | 2.971122874 | processed_transc | 14 | 90868867  | 90871579          |
| ENSG00000258425 | 0.869158192 | 0           | lincRNA          | 14 | 75018884  | 75026751          |
| ENSG00000258427 | 1.16343121  | 1.518964905 | pseudogene       | 14 | 60864475  | 60864996          |
| ENSG00000258428 | 0           | 0.390640832 | antisense        | 14 | 57099962  | 57115376          |
| ENSG00000258429 | 4.981125677 | 5.466810074 | protein_coding   | 16 | 69362524  | 69364498 PDF      |
| ENSG00000258433 | 0           | 0.390640832 | lincRNA          | 15 | 95577613  | 95578966          |
| ENSG00000258439 | 0.499066092 | 1.518964905 | pseudogene       | 14 | 75124752  | 75125293          |
| ENSG00000258441 | 7.169937448 | 6.130036786 | processed_transc | 14 | 21668238  | 21675059          |
| ENSG00000258443 | 0           | 0.390640832 | processed_transc | 14 | 73983937  | 73987352          |
| ENSG00000258445 | 0           | 0.950786998 | pseudogene       | 14 | 61246697  | 61247309          |
| ENSG00000258448 | 1.960915222 | 1.353254395 | pseudogene       | 14 | 73534816  | 73535326          |
| ENSG00000258450 | 0.499066092 | 1.925536307 | sense_intronic   | 14 | 50096009  | 50096608          |
| ENSG00000258451 | 0.499066092 | 0           | lincRNA          | 14 | 21161639  | 21175279          |
| ENSG00000258452 | 0.499066092 | 0           | pseudogene       | 14 | 81288868  | 81289140          |
| ENSG00000258454 | 1.799000381 | 1.353254395 | processed_transc | 14 | 76702160  | 76729817          |
| ENSG00000258455 | 0           | 0.390640832 | antisense        | 14 | 55792552  | 55806219          |
| ENSG00000258457 | 3.211941663 | 3.368666104 | antisense        | 14 | 23451907  | 23468287          |
| ENSG00000258458 | 0.499066092 | 1.16600992  | processed_transc | 14 | 23171820  | 23235771          |
| ENSG00000258461 | 1.616589159 | 2.501982735 | processed_transc | 15 | 42640301  | 42704515          |
| ENSG00000258465 | 0           | 0.697730409 | protein_coding   | 1  | 160187254 | 160254920         |
| ENSG00000258466 | 0.869158192 | 0.697730409 | protein_coding   | 14 | 68126537  | 68157084          |
| ENSG00000258469 | 2.762599152 | 1.353254395 | pseudogene       | 14 | 55765362  | 55765949 CHMP4BP1 |
| ENSG00000258471 | 0           | 0.697730409 | antisense        | 14 | 21463996  | 21467322          |
| ENSG00000258473 | 0           | 0.390640832 | processed_transc | 14 | 77514515  | 77552789          |
| ENSG00000258474 | 0.869158192 | 0           | protein_coding   | 14 | 32414059  | 32419588          |
| ENSG00000258477 | 0           | 0.950786998 | pseudogene       | 14 | 68888415  | 68888913          |
| ENSG00000258479 | 0.499066092 | 1.802319292 | lincRNA          | 14 | 51800111  | 51832275          |
| ENSG00000258480 | 0           | 0.390640832 | lincRNA          | 14 | 40856762  | 40858344          |
| ENSG00000258485 | 0.869158192 | 1.353254395 | pseudogene       | 14 | 61385961  | 61386873          |
| ENSG00000258486 | 15.90208542 | 15.97679898 | antisense        | 14 | 50053297  | 50053596 RN7SL1   |
| ENSG00000258487 | 0           | 0.390640832 | lincRNA          | 14 | 44913950  | 44949821          |
| ENSG00000258490 | 0.869158192 | 0.390640832 | antisense        | 14 | 67435755  | 67436533          |
| ENSG00000258492 | 5.036678094 | 5.361622823 | antisense        | 11 | 2696556   | 2721224 KCNQ1OT1  |
| ENSG00000258496 | 0.499066092 | 0           | lincRNA          | 14 | 87717447  | 87718023          |
| ENSG00000258498 | 2.10647801  | 0           | processed_transc | 14 | 102018558 | 102026768 DIO3OS  |
| ENSG00000258499 | 0           | 0.697730409 | lincRNA          | 14 | 93372042  | 93373827          |
| ENSG00000258501 | 0.869158192 | 0.390640832 | pseudogene       | 14 | 82382575  | 82384232          |
| ENSG00000258502 | 0.499066092 | 0           | lincRNA          | 14 | 66578299  | 66592565          |
| ENSG00000258509 | 0.499066092 | 0.390640832 | pseudogene       | 14 | 45356637  | 45356944          |
| ENSG00000258510 | 1.16343121  | 0.950786998 | pseudogene       | 14 | 77825766  | 77826304          |
| ENSG00000258512 | 1.799000381 | 0.950786998 | protein_coding   | 14 | 102196774 | 102198859         |
| ENSG00000258515 | 0.499066092 | 0.390640832 | non_coding       | 14 | 20919464  | 20920077          |
| ENSG00000258520 | 1.16343121  | 1.925536307 | lincRNA          | 14 | 69705883  | 69727284          |
| ENSG00000258521 | 3.077135474 | 2.851901313 | non_coding       | 14 | 100806169 | 100806891         |
| ENSG00000258522 | 0.499066092 | 0.697730409 | non_coding       | 14 | 100657423 | 100715854         |
| ENSG00000258523 | 0           | 1.16600992  | lincRNA          | 14 | 21510241  | 21514097          |
| ENSG00000258524 | 1.960915222 | 0.950786998 | pseudogene       | 14 | 74037863  | 74038371 NT5CP1   |
| ENSG00000258525 | 0.499066092 | 0.390640832 | antisense        | 14 | 31345385  | 31359014          |

|                 |             |             |                    |    |           |                        |
|-----------------|-------------|-------------|--------------------|----|-----------|------------------------|
| ENSG00000258526 | 0.869158192 | 0.390640832 | lincRNA            | 14 | 39944044  | 39982984               |
| ENSG00000258527 | 1.407729925 | 0.697730409 | pseudogene         | 15 | 93338877  | 93339669 ASB9P1        |
| ENSG00000258528 | 0.499066092 | 0           | lincRNA            | 14 | 50958330  | 50959289               |
| ENSG00000258531 | 0.869158192 | 1.353254395 | pseudogene         | 14 | 69403319  | 69403580               |
| ENSG00000258534 | 3.335220907 | 2.501982735 | lincRNA            | 14 | 104320703 | 104346448              |
| ENSG00000258535 | 0.499066092 | 1.16600992  | sense_overlappin   | 14 | 52231994  | 52292140               |
| ENSG00000258537 | 0.499066092 | 0           | lincRNA            | 14 | 51921230  | 52066670 FRMD6-AS2     |
| ENSG00000258539 | 1.407729925 | 2.144285137 | protein_coding     | 10 | 126305649 | 126480296              |
| ENSG00000258545 | 1.960915222 | 2.420525079 | processed_transc X |    | 119170201 | 119280760              |
| ENSG00000258550 | 0.499066092 | 0           | pseudogene         | 14 | 52229774  | 52230794               |
| ENSG00000258553 | 0.499066092 | 0.950786998 | antisense          | 14 | 60435834  | 60558501               |
| ENSG00000258556 | 0           | 0.697730409 | lincRNA            | 14 | 60789954  | 60790625               |
| ENSG00000258558 | 0.499066092 | 0           | antisense          | 14 | 31204132  | 31291908               |
| ENSG00000258559 | 3.502389126 | 4.15321211  | processed_transc   | 14 | 74755830  | 74761128               |
| ENSG00000258561 | 2.57521082  | 2.501982735 | lincRNA            | 14 | 66679528  | 66976112               |
| ENSG00000258565 | 3.077135474 | 3.081239798 | pseudogene         | 14 | 69334574  | 69336668               |
| ENSG00000258566 | 0           | 0.697730409 | pseudogene         | 14 | 77156485  | 77157236               |
| ENSG00000258568 | 2.10647801  | 2.971122874 | pseudogene         | 14 | 50066712  | 50067290 RHOQP1        |
| ENSG00000258571 | 0.499066092 | 0.697730409 | pseudogene         | 14 | 71552199  | 71552550 PTTG4P        |
| ENSG00000258577 | 0           | 0.390640832 | pseudogene         | 14 | 51038637  | 51038858               |
| ENSG00000258580 | 0.869158192 | 0           | processed_transc   | 14 | 32842543  | 32887180               |
| ENSG00000258581 | 1.16343121  | 0.697730409 | pseudogene         | 14 | 100832965 | 100833256              |
| ENSG00000258583 | 0.499066092 | 0           | lincRNA            | 14 | 59294952  | 59484046               |
| ENSG00000258590 | 1.799000381 | 1.667587519 | pseudogene         | 15 | 20862967  | 20893737 NBEAP1        |
| ENSG00000258591 | 0.869158192 | 0           | pseudogene         | 14 | 39577546  | 39577876               |
| ENSG00000258593 | 0           | 0.390640832 | antisense          | 14 | 105324129 | 105325618              |
| ENSG00000258597 | 0           | 0.390640832 | pseudogene         | 14 | 94830053  | 94833039 SERPINA2      |
| ENSG00000258599 | 0.869158192 | 2.039052734 | pseudogene         | 14 | 21451247  | 21453228               |
| ENSG00000258602 | 1.799000381 | 0.697730409 | lincRNA            | 14 | 77425981  | 77432145               |
| ENSG00000258603 | 1.616589159 | 2.242360793 | antisense          | 14 | 74083412  | 74100644               |
| ENSG00000258604 | 0.499066092 | 0           | lincRNA            | 14 | 21492331  | 21497430               |
| ENSG00000258608 | 1.16343121  | 0.697730409 | pseudogene         | 14 | 45759239  | 45759589               |
| ENSG00000258609 | 4.464551814 | 3.748356452 | lincRNA            | 18 | 54721813  | 54739350               |
| ENSG00000258611 | 0.499066092 | 0           | pseudogene         | 15 | 93608818  | 93609835               |
| ENSG00000258612 | 0.499066092 | 0           | processed_transc   | 14 | 35013705  | 35015183               |
| ENSG00000258613 | 0           | 0.390640832 | pseudogene         | 14 | 65733356  | 65734408               |
| ENSG00000258616 | 0           | 0.390640832 | lincRNA            | 14 | 46175453  | 46185155               |
| ENSG00000258620 | 0           | 0.950786998 | sense_intronic     | 14 | 100872936 | 100873950              |
| ENSG00000258623 | 1.407729925 | 0.390640832 | antisense          | 14 | 69150128  | 69152282               |
| ENSG00000258626 | 1.16343121  | 1.16600992  | pseudogene         | 14 | 68119008  | 68119331 COX7A2P1      |
| ENSG00000258633 | 3.448790144 | 2.144285137 | antisense          | 14 | 45346077  | 45366280               |
| ENSG00000258634 | 6.616550626 | 6.440109466 | antisense          | 1  | 110600962 | 110605177              |
| ENSG00000258640 | 0           | 0.390640832 | pseudogene         | 14 | 31580780  | 31581445 RPL21P5       |
| ENSG00000258642 | 0.499066092 | 2.334191469 | antisense          | 14 | 21342464  | 21343927               |
| ENSG00000258643 | 2.471521042 | 2.420525079 | protein_coding     | 14 | 23776044  | 23794578 BCL2L2-PABPN1 |
| ENSG00000258645 | 1.407729925 | 0.950786998 | pseudogene         | 14 | 64068227  | 64068529               |
| ENSG00000258646 | 1.16343121  | 1.925536307 | antisense          | 14 | 75471422  | 75475184               |
| ENSG00000258648 | 0           | 0.697730409 | pseudogene         | 14 | 31152251  | 31152804 UBE2CP1       |
| ENSG00000258654 | 0.499066092 | 0           | lincRNA            | 15 | 20549989  | 20564419               |
| ENSG00000258655 | 5.286269488 | 4.826083323 | antisense          | 14 | 32544625  | 32545999 ARHGAP5-AS1   |
| ENSG00000258658 | 0.499066092 | 0.697730409 | antisense          | 14 | 58836741  | 58862359               |
| ENSG00000258659 | 0           | 0.950786998 | protein_coding     | 11 | 5617946   | 5665628 TRIM34         |
| ENSG00000258660 | 3.502389126 | 3.714580548 | antisense          | 14 | 74164806  | 74167054               |
| ENSG00000258667 | 2.57521082  | 4.857374129 | lincRNA            | 14 | 62182276  | 62217815               |
| ENSG00000258670 | 0.499066092 | 0           | antisense          | 14 | 60981837  | 61021634               |
| ENSG00000258673 | 1.407729925 | 1.802319292 | antisense          | 1  | 110625310 | 110652341              |
| ENSG00000258679 | 0           | 0.390640832 | pseudogene         | 12 | 57216769  | 57268052               |
| ENSG00000258682 | 3.744048221 | 3.906303962 | processed_transc   | 14 | 58731380  | 58736399               |
| ENSG00000258684 | 0.499066092 | 0           | pseudogene         | 15 | 21365634  | 21372686               |
| ENSG00000258686 | 3.077135474 | 3.279072565 | processed_transc   | 1  | 110583793 | 110617263              |
| ENSG00000258689 | 0.869158192 | 0           | processed_transc   | 14 | 71165415  | 71178870               |
| ENSG00000258693 | 0.869158192 | 0.390640832 | non_coding         | 14 | 100443452 | 100444435              |
| ENSG00000258695 | 0.869158192 | 2.039052734 | antisense          | 14 | 73989582  | 73997314               |

|                 |             |             |                  |    |           |           |           |
|-----------------|-------------|-------------|------------------|----|-----------|-----------|-----------|
| ENSG00000258699 | 0.499066092 | 0           | processed_transc | 14 | 89821404  | 89822915  |           |
| ENSG00000258701 | 4.77879189  | 4.17820932  | lincRNA          | 14 | 105287538 | 105290055 |           |
| ENSG00000258704 | 3.698846687 | 4.226940739 | processed_transc | 14 | 35390064  | 35451738  |           |
| ENSG00000258708 | 2.35979773  | 1.925536307 | protein_coding   | 14 | 37641093  | 37643016  |           |
| ENSG00000258711 | 1.616589159 | 2.652276565 | lincRNA          | 14 | 51422977  | 51428720  |           |
| ENSG00000258712 | 0           | 0.390640832 | pseudogene       | 15 | 22015705  | 22016791  | CXADRP2   |
| ENSG00000258713 | 1.407729925 | 0.950786998 | protein_coding   | 20 | 2795657   | 2796481   |           |
| ENSG00000258716 | 0.869158192 | 0           | processed_transc | 14 | 91163677  | 91165718  |           |
| ENSG00000258725 | 2.671945279 | 2.971122874 | antisense        | 15 | 91509575  | 91531854  |           |
| ENSG00000258727 | 3.744048221 | 4.622587519 | antisense        | 14 | 24030306  | 24037282  |           |
| ENSG00000258730 | 1.799000381 | 2.039052734 | antisense        | 14 | 93533797  | 93538497  | ITPK1-AS1 |
| ENSG00000258731 | 0.499066092 | 0.697730409 | antisense        | 14 | 53620072  | 53624246  |           |
| ENSG00000258733 | 3.274897671 | 3.027231696 | lincRNA          | 14 | 86401054  | 86596117  |           |
| ENSG00000258734 | 0           | 0.390640832 | pseudogene       | 14 | 59294400  | 59294894  |           |
| ENSG00000258735 | 0.869158192 | 0           | protein_coding   | 14 | 104314058 | 104324386 |           |
| ENSG00000258736 | 1.407729925 | 0.697730409 | lincRNA          | 14 | 105119885 | 105122124 |           |
| ENSG00000258738 | 3.502389126 | 3.87606762  | antisense        | 14 | 35343549  | 35345665  |           |
| ENSG00000258741 | 0           | 0.950786998 | pseudogene       | 15 | 93277053  | 93277425  |           |
| ENSG00000258742 | 0.499066092 | 0           | lincRNA          | 14 | 93352697  | 93359851  |           |
| ENSG00000258744 | 0.869158192 | 1.518964905 | protein_coding   | 14 | 24970800  | 24977894  |           |
| ENSG00000258745 | 0.869158192 | 0.697730409 | antisense        | 14 | 51378944  | 51380076  |           |
| ENSG00000258752 | 1.16343121  | 0           | processed_transc | 14 | 89816629  | 89831043  |           |
| ENSG00000258754 | 0           | 0.390640832 | lincRNA          | 15 | 94261771  | 94614049  |           |
| ENSG00000258758 | 0.499066092 | 0.697730409 | pseudogene       | 14 | 57507603  | 57509222  |           |
| ENSG00000258759 | 0.499066092 | 0.697730409 | pseudogene       | 14 | 68265721  | 68266326  |           |
| ENSG00000258760 | 1.16343121  | 1.353254395 | processed_transc | 14 | 65703198  | 65785508  |           |
| ENSG00000258766 | 0.499066092 | 0.950786998 | antisense        | 14 | 80677762  | 80921812  |           |
| ENSG00000258768 | 3.911897206 | 4.342020395 | non_coding       | 14 | 20724717  | 20755899  |           |
| ENSG00000258769 | 0.499066092 | 1.353254395 | pseudogene       | 14 | 74949688  | 74950138  | RAP1AP    |
| ENSG00000258777 | 1.616589159 | 0.390640832 | lincRNA          | 14 | 62147759  | 62162541  |           |
| ENSG00000258778 | 0.499066092 | 1.16600992  | pseudogene       | 14 | 64201415  | 64202640  |           |
| ENSG00000258788 | 0.869158192 | 0.697730409 | pseudogene       | 14 | 96689445  | 96689681  |           |
| ENSG00000258789 | 2.762599152 | 3.081239798 | processed_transc | 14 | 89017941  | 89018837  |           |
| ENSG00000258790 | 2.57521082  | 2.721932731 | protein_coding   | 14 | 35591755  | 35786680  | KIAA0391  |
| ENSG00000258791 | 0.499066092 | 1.802319292 | processed_transc | 14 | 56247864  | 56263406  | LINC00520 |
| ENSG00000258793 | 3.211941663 | 1.802319292 | non_coding       | 14 | 96725748  | 96734961  |           |
| ENSG00000258796 | 0.499066092 | 0.390640832 | pseudogene       | 14 | 67227250  | 67227736  |           |
| ENSG00000258801 | 1.16343121  | 0.390640832 | lincRNA          | 14 | 70918874  | 70924555  |           |
| ENSG00000258802 | 0.869158192 | 0           | pseudogene       | 14 | 53265622  | 53265779  |           |
| ENSG00000258806 | 0.499066092 | 0.950786998 | polymorphic_pse  | 14 | 20697561  | 20698500  | OR11H7    |
| ENSG00000258808 | 0.499066092 | 0.390640832 | processed_transc | 14 | 51858846  | 51863853  |           |
| ENSG00000258809 | 0.869158192 | 1.802319292 | lincRNA          | 14 | 64825486  | 64846036  |           |
| ENSG00000258811 | 3.004694206 | 1.518964905 | lincRNA          | 14 | 105309000 | 105312253 |           |
| ENSG00000258813 | 0.499066092 | 1.353254395 | lincRNA          | 14 | 73525139  | 73526123  |           |
| ENSG00000258817 | 0.869158192 | 0.390640832 | protein_coding   | 11 | 49973943  | 49974971  | OR4C13    |
| ENSG00000258819 | 0.499066092 | 0           | lincRNA          | 14 | 77535523  | 77542687  |           |
| ENSG00000258821 | 0.869158192 | 1.925536307 | antisense        | 2  | 74725815  | 74726494  |           |
| ENSG00000258823 | 0           | 0.390640832 | pseudogene       | 14 | 23192685  | 23195781  |           |
| ENSG00000258824 | 5.018397273 | 4.448594745 | antisense        | 14 | 64889653  | 64915275  |           |
| ENSG00000258825 | 0.499066092 | 0.390640832 | processed_transc | 14 | 97397704  | 97409917  |           |
| ENSG00000258837 | 0           | 1.16600992  | antisense        | 14 | 68591721  | 68596913  |           |
| ENSG00000258838 | 0.499066092 | 0           | protein_coding   | 10 | 50723247  | 50747584  |           |
| ENSG00000258839 | 3.603959378 | 2.721932731 | protein_coding   | 16 | 89984287  | 89987385  | MC1R      |
| ENSG00000258846 | 0.499066092 | 0.390640832 | pseudogene       | 12 | 97294475  | 97296476  |           |
| ENSG00000258851 | 0.499066092 | 0.390640832 | sense_overlappin | 14 | 104019758 | 104028214 |           |
| ENSG00000258856 | 1.16343121  | 0           | pseudogene       | 14 | 58096644  | 58097407  |           |
| ENSG00000258857 | 0.869158192 | 1.353254395 | lincRNA          | 14 | 50863731  | 50865063  |           |
| ENSG00000258858 | 0           | 0.697730409 | antisense        | 14 | 105156428 | 105157621 |           |
| ENSG00000258863 | 0.499066092 | 0           | pseudogene       | 14 | 20996274  | 20997118  |           |
| ENSG00000258870 | 0.499066092 | 1.16600992  | pseudogene       | 14 | 21887779  | 21888119  |           |
| ENSG00000258871 | 0.499066092 | 0           | lincRNA          | 14 | 73019288  | 73061833  |           |
| ENSG00000258872 | 0.499066092 | 0.390640832 | pseudogene       | 14 | 55351566  | 55352931  |           |
| ENSG00000258875 | 2.471521042 | 2.242360793 | protein_coding   | 14 | 91709103  | 91717426  |           |

|                 |             |             |                  |    |           |                    |
|-----------------|-------------|-------------|------------------|----|-----------|--------------------|
| ENSG00000258876 | 0.499066092 | 0.390640832 | lincRNA          | 14 | 76437267  | 76437930           |
| ENSG00000258879 | 0           | 0.390640832 | lincRNA          | 12 | 25164349  | 25173827           |
| ENSG00000258884 | 2.238690726 | 0.950786998 | lincRNA          | 14 | 91288709  | 91294472           |
| ENSG00000258886 | 0           | 0.390640832 | pseudogene       | 14 | 31433553  | 31433830           |
| ENSG00000258889 | 6.196276899 | 6.123616685 | lincRNA          | 14 | 70833571  | 70839810           |
| ENSG00000258890 | 8.114176072 | 8.508664347 | protein_coding   | 17 | 62502255  | 62534060 CEP95     |
| ENSG00000258891 | 1.616589159 | 2.501982735 | antisense        | 14 | 74362867  | 74404817           |
| ENSG00000258895 | 0           | 0.390640832 | pseudogene       | 15 | 94576887  | 94577406           |
| ENSG00000258896 | 0.499066092 | 1.353254395 | pseudogene       | 14 | 60625694  | 60626042           |
| ENSG00000258900 | 3.950976309 | 4.17820932  | pseudogene       | 14 | 58987941  | 58988706 HNRPCP    |
| ENSG00000258903 | 0.499066092 | 0.390640832 | lincRNA          | 14 | 62570096  | 62583893           |
| ENSG00000258904 | 2.35979773  | 1.802319292 | sense_intronic   | 14 | 100730118 | 100731742          |
| ENSG00000258907 | 0.499066092 | 0.390640832 | pseudogene       | 12 | 56048346  | 56048952           |
| ENSG00000258914 | 2.57521082  | 1.353254395 | lincRNA          | 14 | 104341392 | 104343815          |
| ENSG00000258915 | 0.499066092 | 0           | pseudogene       | 14 | 81448332  | 81449982           |
| ENSG00000258917 | 1.616589159 | 1.353254395 | pseudogene       | 14 | 78162934  | 78163720           |
| ENSG00000258918 | 0.499066092 | 0.390640832 | lincRNA          | 14 | 21366144  | 21404414           |
| ENSG00000258919 | 0.499066092 | 0           | non_coding       | 14 | 102095321 | 102098867          |
| ENSG00000258920 | 4.712111592 | 4.903073497 | protein_coding   | 14 | 89883698  | 89886137           |
| ENSG00000258922 | 1.16343121  | 1.16600992  | processed_transc | 15 | 93349000  | 93351797           |
| ENSG00000258925 | 0.499066092 | 0.697730409 | pseudogene       | 15 | 92829082  | 92829907           |
| ENSG00000258929 | 5.431503808 | 5.248158938 | protein_coding   | 14 | 50474031  | 50507947           |
| ENSG00000258930 | 0.869158192 | 0.390640832 | pseudogene       | 14 | 71498403  | 71498687           |
| ENSG00000258935 | 0.499066092 | 0           | lincRNA          | 14 | 91033839  | 91036320           |
| ENSG00000258938 | 0.499066092 | 2.039052734 | antisense        | 14 | 36288430  | 36295971           |
| ENSG00000258939 | 0           | 0.390640832 | pseudogene       | 10 | 135468382 | 135469546          |
| ENSG00000258940 | 0.869158192 | 2.039052734 | antisense        | 14 | 39735624  | 39736265           |
| ENSG00000258942 | 0.869158192 | 0.390640832 | processed_transc | 14 | 51811632  | 51852321           |
| ENSG00000258944 | 2.57521082  | 3.027231696 | antisense        | 14 | 73738890  | 73740789           |
| ENSG00000258946 | 0.499066092 | 1.16600992  | lincRNA          | 14 | 50394289  | 50428678           |
| ENSG00000258947 | 4.464551814 | 2.721932731 | protein_coding   | 16 | 89979826  | 90002505           |
| ENSG00000258948 | 0.499066092 | 0           | pseudogene       | 14 | 39196479  | 39197703           |
| ENSG00000258949 | 5.331395195 | 5.94580061  | antisense        | 14 | 45368111  | 45381066           |
| ENSG00000258951 | 2.238690726 | 2.039052734 | pseudogene       | 14 | 71061269  | 71062487           |
| ENSG00000258953 | 0           | 0.390640832 | pseudogene       | 5  | 126381051 | 126409172          |
| ENSG00000258955 | 1.407729925 | 1.353254395 | lincRNA          | 14 | 51771134  | 51795104 LINC00519 |
| ENSG00000258957 | 1.616589159 | 1.802319292 | lincRNA          | 14 | 69649737  | 69680809           |
| ENSG00000258959 | 3.698846687 | 2.501982735 | antisense        | 14 | 102502652 | 102532565          |
| ENSG00000258960 | 0.499066092 | 0.950786998 | pseudogene       | 14 | 66367650  | 66368169           |
| ENSG00000258966 | 0           | 0.390640832 | pseudogene       | 14 | 71511092  | 71511357           |
| ENSG00000258968 | 0.869158192 | 0           | pseudogene       | 14 | 31487652  | 31488044           |
| ENSG00000258972 | 0           | 0.950786998 | pseudogene       | 14 | 74098179  | 74098723 NDUFB8P1  |
| ENSG00000258976 | 2.238690726 | 2.334191469 | lincRNA          | 14 | 75081396  | 75083350           |
| ENSG00000258978 | 0.499066092 | 0           | pseudogene       | 14 | 75583129  | 75583303           |
| ENSG00000258980 | 0           | 1.16600992  | pseudogene       | 14 | 65995548  | 65996292           |
| ENSG00000258982 | 1.16343121  | 0.697730409 | non_coding       | 14 | 100673744 | 100704892          |
| ENSG00000258983 | 0.869158192 | 0           | processed_transc | 14 | 88965678  | 88981433           |
| ENSG00000258984 | 0.869158192 | 0.390640832 | protein_coding   | 2  | 238875656 | 239008053          |
| ENSG00000258985 | 4.261916566 | 3.845183986 | antisense        | 14 | 53503473  | 53504969           |
| ENSG00000258987 | 0.499066092 | 0.390640832 | protein_coding   | 14 | 94405901  | 94410475           |
| ENSG00000258988 | 0           | 0.390640832 | pseudogene       | 14 | 67665779  | 67667044           |
| ENSG00000258997 | 0.499066092 | 0           | pseudogene       | 15 | 22133181  | 22152165 NF1P1     |
| ENSG00000258998 | 3.077135474 | 4.547834947 | lincRNA          | 14 | 45232360  | 45252032           |
| ENSG00000258999 | 2.238690726 | 1.16600992  | antisense        | 14 | 81573377  | 81636758           |
| ENSG00000259000 | 0           | 1.518964905 | pseudogene       | 14 | 45329519  | 45335450           |
| ENSG00000259001 | 0           | 0.390640832 | antisense        | 14 | 20811207  | 20811844           |
| ENSG00000259005 | 1.799000381 | 3.027231696 | lincRNA          | 14 | 74940710  | 74941567           |
| ENSG00000259006 | 0           | 0.697730409 | processed_transc | 16 | 89986235  | 89989070           |
| ENSG00000259008 | 0.499066092 | 0           | lincRNA          | 14 | 57822164  | 57826128           |
| ENSG00000259010 | 0           | 0.697730409 | pseudogene       | 14 | 65066961  | 65068362           |
| ENSG00000259013 | 0.499066092 | 0.697730409 | pseudogene       | 14 | 102435702 | 102435938          |
| ENSG00000259014 | 1.407729925 | 2.788380093 | processed_transc | 14 | 73768103  | 73769589           |
| ENSG00000259015 | 3.830412367 | 3.935919592 | pseudogene       | 14 | 73427303  | 73428701           |

|                 |             |             |                  |    |           |           |              |
|-----------------|-------------|-------------|------------------|----|-----------|-----------|--------------|
| ENSG00000259020 | 2.238690726 | 2.971122874 | pseudogene       | 14 | 92492910  | 92493231  |              |
| ENSG00000259023 | 1.799000381 | 1.353254395 | non_coding       | 14 | 101872324 | 101903211 | LINC00524    |
| ENSG00000259030 | 0           | 0.950786998 | protein_coding   | 1  | 74663926  | 75009666  |              |
| ENSG00000259031 | 0.499066092 | 0.390640832 | lincRNA          | 14 | 101005276 | 101006746 |              |
| ENSG00000259032 | 0.869158192 | 0           | pseudogene       | 14 | 83159049  | 83159399  |              |
| ENSG00000259033 | 0.499066092 | 0.950786998 | lincRNA          | 14 | 70742013  | 70758576  |              |
| ENSG00000259036 | 0.499066092 | 0.390640832 | non_coding       | 14 | 96699768  | 96700438  |              |
| ENSG00000259038 | 1.16343121  | 0.950786998 | antisense        | 14 | 69093883  | 69095162  |              |
| ENSG00000259039 | 0.499066092 | 0.697730409 | antisense        | 14 | 58045350  | 58048038  |              |
| ENSG00000259042 | 0           | 0.390640832 | processed_transc | 14 | 22886826  | 22887645  |              |
| ENSG00000259045 | 0           | 0.697730409 | pseudogene       | 14 | 32953304  | 32954006  |              |
| ENSG00000259051 | 1.799000381 | 1.16600992  | pseudogene       | 14 | 43769466  | 43769798  |              |
| ENSG00000259062 | 2.10647801  | 2.144285137 | antisense        | 14 | 69446399  | 69454180  | ACTN1-AS1    |
| ENSG00000259065 | 2.847891871 | 2.721932731 | antisense        | 14 | 74254063  | 74269973  |              |
| ENSG00000259066 | 0           | 0.390640832 | protein_coding   | 14 | 93651318  | 93684932  |              |
| ENSG00000259067 | 0.499066092 | 0.697730409 | lincRNA          | 14 | 105370679 | 105371541 |              |
| ENSG00000259070 | 0.499066092 | 1.518964905 | non_coding       | 14 | 39218545  | 39417477  |              |
| ENSG00000259071 | 2.57521082  | 3.133298822 | lincRNA          | 14 | 50793244  | 50794627  |              |
| ENSG00000259075 | 0           | 0.697730409 | protein_coding   | 12 | 89913185  | 89920039  | POC1B-GALNT4 |
| ENSG00000259078 | 0.869158192 | 0           | pseudogene       | 14 | 65745985  | 65747884  |              |
| ENSG00000259079 | 0.869158192 | 1.518964905 | pseudogene       | 14 | 71797059  | 71797455  |              |
| ENSG00000259081 | 1.407729925 | 2.579085888 | antisense        | 14 | 77240627  | 77247861  |              |
| ENSG00000259083 | 0.499066092 | 0.697730409 | lincRNA          | 14 | 39644089  | 39645084  |              |
| ENSG00000259085 | 2.762599152 | 2.851901313 | non_coding       | 14 | 20789322  | 20790303  |              |
| ENSG00000259088 | 1.16343121  | 0.697730409 | antisense        | 14 | 102262892 | 102276658 |              |
| ENSG00000259090 | 0           | 0.697730409 | pseudogene       | 14 | 35627110  | 35628305  |              |
| ENSG00000259093 | 0.499066092 | 0           | lincRNA          | 14 | 63589751  | 63594932  |              |
| ENSG00000259094 | 2.57521082  | 0.697730409 | antisense        | 2  | 119706882 | 119710559 |              |
| ENSG00000259096 | 0.499066092 | 0.697730409 | pseudogene       | 14 | 88418871  | 88421547  |              |
| ENSG00000259098 | 2.928422289 | 2.721932731 | pseudogene       | 15 | 22546089  | 22546799  |              |
| ENSG00000259100 | 2.671945279 | 1.925536307 | pseudogene       | 14 | 39854608  | 39856306  |              |
| ENSG00000259103 | 0.499066092 | 0           | antisense        | 14 | 76280845  | 76314041  |              |
| ENSG00000259107 | 0.499066092 | 0           | lincRNA          | 14 | 85860223  | 85886418  |              |
| ENSG00000259113 | 0.869158192 | 0           | lincRNA          | 14 | 50915525  | 50923460  |              |
| ENSG00000259116 | 3.146112541 | 3.027231696 | antisense        | 14 | 64980872  | 65007086  |              |
| ENSG00000259118 | 2.10647801  | 2.721932731 | antisense        | 14 | 65548752  | 65560930  |              |
| ENSG00000259120 | 1.16343121  | 0           | protein_coding   | 17 | 73643457  | 73643645  | C17orf110    |
| ENSG00000259121 | 0.499066092 | 1.518964905 | pseudogene       | 14 | 39560105  | 39560302  |              |
| ENSG00000259124 | 0           | 0.390640832 | lincRNA          | 14 | 76961706  | 77193055  |              |
| ENSG00000259125 | 0           | 0.390640832 | antisense        | 12 | 57538403  | 57541402  |              |
| ENSG00000259126 | 0.869158192 | 0.950786998 | lincRNA          | 14 | 44861734  | 44862919  |              |
| ENSG00000259127 | 0           | 0.390640832 | antisense        | 10 | 103973720 | 104016874 |              |
| ENSG00000259129 | 0           | 0.697730409 | lincRNA          | 14 | 48234157  | 48264295  |              |
| ENSG00000259130 | 0.499066092 | 1.667587519 | lincRNA          | 14 | 21338437  | 21341751  |              |
| ENSG00000259135 | 0.869158192 | 0.697730409 | processed_transc | 14 | 35025980  | 35030504  |              |
| ENSG00000259138 | 0           | 0.697730409 | antisense        | 14 | 75593856  | 75603633  |              |
| ENSG00000259143 | 3.830412367 | 1.16600992  | processed_transc | 14 | 95651454  | 95652191  |              |
| ENSG00000259144 | 0           | 0.950786998 | pseudogene       | 14 | 21188862  | 21191288  |              |
| ENSG00000259146 | 3.004694206 | 3.493416095 | antisense        | 14 | 71759435  | 71788531  |              |
| ENSG00000259151 | 0.499066092 | 0           | pseudogene       | 14 | 89756541  | 89757938  |              |
| ENSG00000259153 | 5.375152132 | 4.917990497 | lincRNA          | 14 | 71276922  | 71282120  |              |
| ENSG00000259155 | 1.16343121  | 1.802319292 | pseudogene       | 14 | 50144087  | 50144608  |              |
| ENSG00000259156 | 0.869158192 | 0           | pseudogene       | 15 | 20487997  | 20496839  | CHEK2P2      |
| ENSG00000259158 | 1.616589159 | 2.579085888 | lincRNA          | 14 | 70935598  | 70950473  | C14orf55     |
| ENSG00000259160 | 0           | 0.390640832 | pseudogene       | 14 | 65002420  | 65002597  |              |
| ENSG00000259161 | 0           | 0.697730409 | pseudogene       | 14 | 102309734 | 102310459 |              |
| ENSG00000259162 | 0           | 0.390640832 | pseudogene       | 14 | 20906141  | 20909427  |              |
| ENSG00000259163 | 0.499066092 | 0.390640832 | processed_transc | 14 | 91108982  | 91115238  |              |
| ENSG00000259165 | 1.16343121  | 2.039052734 | pseudogene       | 14 | 69550115  | 69552106  | DDX18P1      |
| ENSG00000259166 | 0.499066092 | 0.390640832 | non_coding       | 14 | 101913979 | 101923454 |              |
| ENSG00000259172 | 1.799000381 | 1.518964905 | antisense        | 15 | 101835624 | 101845942 |              |
| ENSG00000259174 | 0.499066092 | 0.697730409 | pseudogene       | 15 | 23181938  | 23182642  |              |
| ENSG00000259175 | 0.869158192 | 0.390640832 | antisense        | 15 | 80846950  | 80855285  |              |



|                 |             |             |                  |    |           |                        |
|-----------------|-------------|-------------|------------------|----|-----------|------------------------|
| ENSG00000259177 | 1.16343121  | 0.697730409 | antisense        | 15 | 90936722  | 90941113               |
| ENSG00000259178 | 0           | 0.697730409 | non_coding       | 15 | 52374499  | 52378771               |
| ENSG00000259179 | 0.499066092 | 0           | pseudogene       | 15 | 31712331  | 31712865               |
| ENSG00000259180 | 0           | 0.390640832 | antisense        | 15 | 55972583  | 55973661               |
| ENSG00000259182 | 0.499066092 | 0.390640832 | lincRNA          | 15 | 101708735 | 101711026              |
| ENSG00000259191 | 2.35979773  | 1.518964905 | pseudogene       | 15 | 69726808  | 69727459               |
| ENSG00000259192 | 0.869158192 | 1.353254395 | pseudogene       | 15 | 38750961  | 38751741               |
| ENSG00000259195 | 0.869158192 | 0           | pseudogene       | 15 | 86314221  | 86314394               |
| ENSG00000259196 | 0           | 0.390640832 | sense_intronic   | 8  | 28807193  | 28813472               |
| ENSG00000259201 | 0.499066092 | 0           | antisense        | 15 | 52179757  | 52193320               |
| ENSG00000259202 | 2.238690726 | 1.802319292 | protein_coding   | 15 | 67435072  | 67439277               |
| ENSG00000259205 | 1.16343121  | 1.925536307 | pseudogene       | 15 | 101093734 | 101099159 PRKXP1       |
| ENSG00000259207 | 7.695130106 | 8.431497548 | protein_coding   | 17 | 45331208  | 45421658 ITGB3         |
| ENSG00000259209 | 1.960915222 | 0.950786998 | antisense        | 16 | 72840887  | 72843538               |
| ENSG00000259211 | 0.869158192 | 0.390640832 | antisense        | 15 | 40756392  | 40758925               |
| ENSG00000259212 | 0.499066092 | 1.667587519 | antisense        | 15 | 91139072  | 91139679               |
| ENSG00000259214 | 0           | 0.390640832 | pseudogene       | 15 | 21031783  | 21031969               |
| ENSG00000259215 | 0           | 0.697730409 | lincRNA          | 15 | 69750861  | 69754145               |
| ENSG00000259216 | 0.499066092 | 0           | pseudogene       | 15 | 49017535  | 49018025               |
| ENSG00000259220 | 1.799000381 | 2.144285137 | protein_coding   | 15 | 64752941  | 64795257               |
| ENSG00000259224 | 1.616589159 | 2.242360793 | protein_coding   | 17 | 7384721   | 7386383 SLC35G6        |
| ENSG00000259228 | 0.499066092 | 0.697730409 | pseudogene       | 15 | 99824830  | 99825781               |
| ENSG00000259230 | 2.35979773  | 0.950786998 | lincRNA          | 14 | 103011591 | 103022163              |
| ENSG00000259232 | 0.499066092 | 0           | pseudogene       | 15 | 65767661  | 65767952               |
| ENSG00000259236 | 0.499066092 | 1.518964905 | pseudogene       | 15 | 102311961 | 102322192              |
| ENSG00000259238 | 0           | 0.390640832 | antisense        | 15 | 59980716  | 59981617               |
| ENSG00000259242 | 1.616589159 | 1.16600992  | antisense        | 19 | 19716690  | 19719991               |
| ENSG00000259244 | 1.16343121  | 0.950786998 | processed_transc | 15 | 85056472  | 85070180               |
| ENSG00000259245 | 0           | 0.390640832 | lincRNA          | 15 | 36338283  | 36341730               |
| ENSG00000259248 | 2.847891871 | 3.32456471  | antisense        | 15 | 63836446  | 63893788               |
| ENSG00000259250 | 4.19837882  | 3.570966319 | antisense        | 15 | 58879706  | 58883875               |
| ENSG00000259251 | 0.499066092 | 0.390640832 | antisense        | 15 | 62352702  | 62354633               |
| ENSG00000259254 | 1.616589159 | 0.390640832 | sense_intronic   | 15 | 40935131  | 40939055               |
| ENSG00000259258 | 0           | 0.390640832 | pseudogene       | 15 | 65397872  | 65398138               |
| ENSG00000259263 | 0.869158192 | 0.697730409 | antisense        | 7  | 101796635 | 101797743              |
| ENSG00000259264 | 3.871730003 | 2.501982735 | antisense        | 15 | 74495046  | 74513896               |
| ENSG00000259265 | 0           | 0.390640832 | antisense        | 15 | 69329889  | 69335905               |
| ENSG00000259275 | 0.499066092 | 0           | lincRNA          | 15 | 96897466  | 96946964               |
| ENSG00000259276 | 0.869158192 | 0.390640832 | antisense        | 15 | 86164495  | 86170920               |
| ENSG00000259280 | 0.499066092 | 0           | processed_transc | 15 | 37168580  | 37179236               |
| ENSG00000259283 | 1.407729925 | 0.390640832 | antisense        | 16 | 55293877  | 55367500               |
| ENSG00000259286 | 0           | 0.390640832 | pseudogene       | 15 | 69126169  | 69127081               |
| ENSG00000259287 | 2.471521042 | 2.039052734 | antisense        | 15 | 34150918  | 34157026               |
| ENSG00000259291 | 2.847891871 | 3.133298822 | processed_transc | 15 | 90617747  | 90625439               |
| ENSG00000259294 | 1.616589159 | 1.802319292 | antisense        | 7  | 101465527 | 101468009              |
| ENSG00000259295 | 4.77879189  | 5.045726316 | pseudogene       | 15 | 85734669  | 85757136               |
| ENSG00000259298 | 1.616589159 | 1.353254395 | antisense        | 15 | 50789392  | 50790941               |
| ENSG00000259299 | 0.499066092 | 0           | pseudogene       | 15 | 29525877  | 29527341               |
| ENSG00000259300 | 0           | 0.390640832 | pseudogene       | 15 | 29904774  | 29906478               |
| ENSG00000259305 | 3.077135474 | 2.039052734 | protein_coding   | 8  | 124238431 | 124279627 ZHX1-C8ORF76 |
| ENSG00000259308 | 1.616589159 | 0           | pseudogene       | 15 | 83713120  | 83713523               |
| ENSG00000259313 | 4.322773689 | 4.021284656 | lincRNA          | 7  | 101993676 | 101995807              |
| ENSG00000259314 | 0.869158192 | 0.390640832 | antisense        | 15 | 91147457  | 91157790               |
| ENSG00000259315 | 1.960915222 | 1.667587519 | pseudogene       | 15 | 83394625  | 83407656               |
| ENSG00000259316 | 2.471521042 | 2.501982735 | processed_transc | 15 | 64472547  | 64665980               |
| ENSG00000259318 | 2.847891871 | 3.411459265 | pseudogene       | 14 | 55861658  | 55861951               |
| ENSG00000259319 | 0.869158192 | 2.039052734 | antisense        | 14 | 75890386  | 75894444               |
| ENSG00000259321 | 1.407729925 | 2.788380093 | lincRNA          | 14 | 24608654  | 24609653               |
| ENSG00000259322 | 0.869158192 | 1.16600992  | antisense        | 15 | 78585628  | 78588391               |
| ENSG00000259326 | 1.960915222 | 2.144285137 | antisense        | 15 | 38795054  | 38797182               |
| ENSG00000259327 | 1.616589159 | 0.950786998 | lincRNA          | 15 | 52408771  | 52414328               |
| ENSG00000259328 | 2.35979773  | 1.518964905 | pseudogene       | 15 | 82944773  | 82974312               |
| ENSG00000259329 | 0.499066092 | 0           | processed_transc | 15 | 78979260  | 79020096               |

|                 |             |             |                  |    |           |                    |
|-----------------|-------------|-------------|------------------|----|-----------|--------------------|
| ENSG00000259330 | 6.050961887 | 5.751299057 | antisense        | 15 | 40617417  | 40618916           |
| ENSG00000259334 | 0           | 0.390640832 | processed_transc | 14 | 24391456  | 24403777 C14orf165 |
| ENSG00000259335 | 0           | 0.697730409 | pseudogene       | 15 | 44739775  | 44741542           |
| ENSG00000259336 | 0.499066092 | 0.390640832 | processed_transc | 15 | 35391223  | 35461899           |
| ENSG00000259341 | 0.869158192 | 0           | lincRNA          | 15 | 99967214  | 99971233           |
| ENSG00000259342 | 2.762599152 | 2.788380093 | antisense        | 15 | 45722850  | 45734006           |
| ENSG00000259343 | 2.238690726 | 2.851901313 | antisense        | 15 | 81616718  | 81654378           |
| ENSG00000259345 | 3.698846687 | 3.411459265 | processed_transc | 15 | 39157523  | 39719396           |
| ENSG00000259349 | 0.499066092 | 2.039052734 | antisense        | 17 | 58603654  | 58628159           |
| ENSG00000259353 | 1.799000381 | 1.667587519 | antisense        | 15 | 59149030  | 59157262           |
| ENSG00000259354 | 5.613019223 | 6.2290532   | lincRNA          | 15 | 45740625  | 45805965           |
| ENSG00000259358 | 0           | 0.697730409 | pseudogene       | 15 | 32057946  | 32060404           |
| ENSG00000259359 | 0           | 0.390640832 | lincRNA          | 15 | 96714810  | 96717568           |
| ENSG00000259363 | 2.471521042 | 2.788380093 | protein_coding   | 15 | 100347228 | 100417353          |
| ENSG00000259364 | 0.499066092 | 0.697730409 | antisense        | 15 | 40745643  | 40746838           |
| ENSG00000259366 | 3.146112541 | 3.411459265 | 3prime_overlapp  | 8  | 28913452  | 28914202           |
| ENSG00000259370 | 0.499066092 | 0.390640832 | antisense        | 15 | 63124323  | 63176233           |
| ENSG00000259372 | 0.499066092 | 0.390640832 | lincRNA          | 15 | 81702858  | 81711358           |
| ENSG00000259373 | 2.10647801  | 0.697730409 | protein_coding   | 17 | 35294084  | 35295143           |
| ENSG00000259374 | 1.407729925 | 1.353254395 | pseudogene       | 14 | 103606012 | 103606406          |
| ENSG00000259376 | 1.16343121  | 1.16600992  | antisense        | 15 | 101583921 | 101589661          |
| ENSG00000259377 | 0           | 0.390640832 | sense_intronic   | 15 | 52044682  | 52048672           |
| ENSG00000259378 | 0.869158192 | 0.390640832 | pseudogene       | 15 | 51236860  | 51238193           |
| ENSG00000259381 | 0.499066092 | 1.16600992  | pseudogene       | 15 | 101185617 | 101186860          |
| ENSG00000259384 | 0.869158192 | 0           | protein_coding   | 17 | 61994563  | 61996198 GH1       |
| ENSG00000259386 | 0.499066092 | 0           | protein_coding   | 15 | 69110560  | 69238461           |
| ENSG00000259387 | 0           | 0.390640832 | pseudogene       | 15 | 82888224  | 82924290           |
| ENSG00000259388 | 0.499066092 | 0           | pseudogene       | 15 | 50086443  | 50088294           |
| ENSG00000259389 | 0.499066092 | 0           | pseudogene       | 15 | 40243642  | 40243909           |
| ENSG00000259394 | 0.869158192 | 0.950786998 | pseudogene       | 15 | 63245372  | 63246320           |
| ENSG00000259395 | 0.499066092 | 0           | lincRNA          | 15 | 36633940  | 36636367           |
| ENSG00000259396 | 0           | 1.353254395 | sense_intronic   | 15 | 41635278  | 41636423           |
| ENSG00000259397 | 0.499066092 | 0.390640832 | pseudogene       | 15 | 35384682  | 35385414           |
| ENSG00000259398 | 0           | 0.390640832 | sense_intronic   | 15 | 52325904  | 52327822           |
| ENSG00000259402 | 0           | 0.390640832 | sense_intronic   | 15 | 59107471  | 59109927           |
| ENSG00000259405 | 1.407729925 | 0.950786998 | pseudogene       | 15 | 41240934  | 41241067 ISCA1P4   |
| ENSG00000259406 | 0           | 0.390640832 | processed_transc | 15 | 101093557 | 101100057          |
| ENSG00000259407 | 1.16343121  | 0.950786998 | antisense        | 15 | 86287340  | 86293512           |
| ENSG00000259408 | 1.960915222 | 2.144285137 | antisense        | 15 | 34147101  | 34149010           |
| ENSG00000259410 | 0.499066092 | 0.390640832 | processed_transc | 15 | 68125063  | 68166204           |
| ENSG00000259412 | 0           | 0.697730409 | sense_overlappin | 8  | 28718058  | 28810397           |
| ENSG00000259416 | 0.499066092 | 1.518964905 | antisense        | 15 | 86298172  | 86299468           |
| ENSG00000259417 | 1.16343121  | 0.950786998 | antisense        | 15 | 80487826  | 80544555           |
| ENSG00000259419 | 0           | 0.390640832 | pseudogene       | 15 | 79528674  | 79529544           |
| ENSG00000259422 | 1.407729925 | 2.242360793 | antisense        | 15 | 76467232  | 76473827           |
| ENSG00000259424 | 0           | 0.697730409 | antisense        | 15 | 99190180  | 99190600           |
| ENSG00000259426 | 3.448790144 | 3.64455972  | processed_transc | 15 | 69689243  | 69707368           |
| ENSG00000259431 | 5.346128795 | 6.2290532   | protein_coding   | 14 | 24025216  | 24029480 THTPA     |
| ENSG00000259436 | 1.960915222 | 1.802319292 | antisense        | 19 | 42656721  | 42661675           |
| ENSG00000259437 | 0           | 0.390640832 | lincRNA          | 15 | 67212149  | 67224093           |
| ENSG00000259438 | 1.16343121  | 2.501982735 | lincRNA          | 15 | 52303196  | 52311292           |
| ENSG00000259439 | 3.871730003 | 3.813624741 | antisense        | 2  | 45147332  | 45166338           |
| ENSG00000259440 | 0           | 0.390640832 | pseudogene       | 15 | 73454120  | 73455269           |
| ENSG00000259442 | 3.393122761 | 2.652276565 | antisense        | 15 | 83412975  | 83419041           |
| ENSG00000259447 | 0           | 0.390640832 | processed_transc | 15 | 39592619  | 39602983           |
| ENSG00000259448 | 0           | 0.697730409 | processed_transc | 15 | 31508223  | 31516648           |
| ENSG00000259450 | 1.407729925 | 2.334191469 | lincRNA          | 15 | 39480639  | 39486510           |
| ENSG00000259453 | 1.16343121  | 0.697730409 | sense_intronic   | 15 | 86244340  | 86246002           |
| ENSG00000259454 | 0           | 0.390640832 | pseudogene       | 15 | 102427557 | 102427970          |
| ENSG00000259456 | 3.004694206 | 2.912743273 | antisense        | 20 | 49547521  | 49561316           |
| ENSG00000259463 | 0.499066092 | 0.390640832 | antisense        | 15 | 41303795  | 41305498           |
| ENSG00000259465 | 0           | 0.390640832 | pseudogene       | 15 | 50709582  | 50710887           |
| ENSG00000259466 | 0           | 0.390640832 | pseudogene       | 15 | 62374649  | 62375504           |

|                 |             |             |                    |    |           |                    |
|-----------------|-------------|-------------|--------------------|----|-----------|--------------------|
| ENSG00000259467 | 0.499066092 | 0.390640832 | pseudogene         | 15 | 49448526  | 49449044           |
| ENSG00000259469 | 1.960915222 | 1.667587519 | lincRNA            | 15 | 49021277  | 49022041           |
| ENSG00000259470 | 1.407729925 | 2.334191469 | pseudogene         | 15 | 71151053  | 71152496 KRT8P9    |
| ENSG00000259475 | 0.869158192 | 0.697730409 | antisense          | 15 | 99497378  | 99646030           |
| ENSG00000259478 | 0.499066092 |             | 0 processed_transc | 15 | 98525739  | 98535455           |
| ENSG00000259479 | 3.744048221 | 3.32456471  | pseudogene         | 15 | 45118569  | 45176892           |
| ENSG00000259480 | 1.16343121  |             | 0 pseudogene       | 15 | 23128188  | 23145997           |
| ENSG00000259484 | 2.928422289 | 2.851901313 | processed_transc   | 15 | 57151866  | 57210697           |
| ENSG00000259486 | 2.10647801  | 2.652276565 | protein_coding     | 19 | 57285920  | 57352097           |
| ENSG00000259488 | 1.16343121  | 1.16600992  | antisense          | 15 | 48604550  | 48624053           |
| ENSG00000259493 | 0.499066092 | 0.390640832 | pseudogene         | 15 | 79851599  | 79852646           |
| ENSG00000259494 | 5.660945913 | 6.365895578 | protein_coding     | 15 | 89002707  | 89010650           |
| ENSG00000259498 | 4.962122459 | 6.186567173 | antisense          | 15 | 63338233  | 63341586           |
| ENSG00000259499 | 0.499066092 |             | 0 non_coding       | 15 | 44679518  | 44682649           |
| ENSG00000259500 | 0           | 0.697730409 | pseudogene         | 15 | 49264000  | 49265558           |
| ENSG00000259501 | 0           | 0.697730409 | pseudogene         | 15 | 22646603  | 22647417           |
| ENSG00000259502 | 0           | 0.390640832 | pseudogene         | 14 | 68077703  | 68080581           |
| ENSG00000259505 | 0.499066092 | 0.390640832 | pseudogene         | 15 | 34282887  | 34284249           |
| ENSG00000259508 | 0.499066092 |             | 0 processed_transc | 14 | 103236377 | 103241128          |
| ENSG00000259510 | 0.499066092 | 1.353254395 | antisense          | 15 | 71125221  | 71146145           |
| ENSG00000259511 | 1.407729925 | 2.144285137 | protein_coding     | 15 | 84841242  | 84850986           |
| ENSG00000259512 | 0.499066092 |             | 0 pseudogene       | 15 | 67920190  | 67921468           |
| ENSG00000259513 | 0.499066092 | 0.390640832 | pseudogene         | 15 | 60850279  | 60850600           |
| ENSG00000259515 | 3.78787645  | 2.420525079 | antisense          | 14 | 103399911 | 103403514          |
| ENSG00000259516 | 0.499066092 | 0.390640832 | pseudogene         | 15 | 35474000  | 35530398 ANP32AP1  |
| ENSG00000259518 | 2.35979773  | 4.29708397  | protein_coding     | 15 | 82380935  | 82390035           |
| ENSG00000259520 | 0.499066092 | 0.950786998 | antisense          | 15 | 45543884  | 45571449           |
| ENSG00000259521 | 0.869158192 |             | 0 antisense        | 15 | 41309005  | 41320091           |
| ENSG00000259522 | 0           | 0.390640832 | protein_coding     | 14 | 24649601  | 24659622           |
| ENSG00000259523 | 2.671945279 | 1.16600992  | antisense          | 15 | 30114834  | 30116284           |
| ENSG00000259525 | 0.499066092 |             | 0 pseudogene       | 14 | 103650541 | 103651376          |
| ENSG00000259526 | 1.407729925 | 1.667587519 | processed_transc   | 15 | 64982366  | 64995393           |
| ENSG00000259527 | 1.16343121  | 0.390640832 | lincRNA            | 15 | 88120160  | 88122917 LINC00052 |
| ENSG00000259529 | 4.322773689 | 4.048652948 | protein_coding     | 14 | 24620427  | 24636611           |
| ENSG00000259531 | 0.869158192 | 0.950786998 | pseudogene         | 15 | 49657325  | 49658882           |
| ENSG00000259532 | 0.499066092 | 0.390640832 | lincRNA            | 15 | 71041271  | 71046516           |
| ENSG00000259535 | 0.499066092 |             | 0 pseudogene       | 14 | 103614934 | 103615745          |
| ENSG00000259536 | 1.616589159 | 1.802319292 | antisense          | 15 | 40780240  | 40850183           |
| ENSG00000259537 | 0           | 0.390640832 | antisense          | 15 | 71143766  | 71145864           |
| ENSG00000259538 | 0           | 0.697730409 | pseudogene         | 15 | 84967471  | 84976535           |
| ENSG00000259542 | 0.499066092 |             | 0 lincRNA          | 15 | 96936375  | 96948419           |
| ENSG00000259544 | 0.499066092 | 0.950786998 | antisense          | 15 | 86269346  | 86270458           |
| ENSG00000259545 | 0           | 0.390640832 | pseudogene         | 15 | 49469807  | 49470938           |
| ENSG00000259547 | 0.499066092 |             | 0 pseudogene       | 15 | 41401076  | 41401376 CYCSP2    |
| ENSG00000259553 | 0           | 0.390640832 | lincRNA            | 15 | 102500051 | 102501611          |
| ENSG00000259555 | 0           | 0.697730409 | antisense          | 15 | 78918237  | 78920535           |
| ENSG00000259556 | 2.847891871 | 2.334191469 | pseudogene         | 15 | 52211270  | 52222824           |
| ENSG00000259557 | 1.799000381 |             | 0 pseudogene       | 15 | 62654230  | 62654530           |
| ENSG00000259562 | 3.78787645  | 3.081239798 | pseudogene         | 15 | 78582853  | 78583563           |
| ENSG00000259563 | 0.499066092 | 1.16600992  | antisense          | 15 | 44808848  | 44809681           |
| ENSG00000259569 | 0           | 0.390640832 | pseudogene         | 15 | 89111518  | 89111787           |
| ENSG00000259570 | 1.16343121  | 0.697730409 | pseudogene         | 15 | 84949210  | 84950212           |
| ENSG00000259571 | 0.499066092 |             | 0 protein_coding   | 11 | 121986062 | 121986923 BLID     |
| ENSG00000259577 | 1.960915222 | 0.950786998 | lincRNA            | 15 | 52472290  | 52498071           |
| ENSG00000259581 | 2.10647801  | 2.242360793 | pseudogene         | 15 | 76551327  | 76554031 TYRO3P    |
| ENSG00000259583 | 4.19837882  | 3.87606762  | antisense          | 15 | 101433945 | 101459488          |
| ENSG00000259584 | 0.869158192 | 0.950786998 | processed_transc   | 15 | 40367405  | 40370905           |
| ENSG00000259585 | 0.499066092 |             | 0 pseudogene       | 15 | 35590448  | 35591641           |
| ENSG00000259590 | 0.499066092 |             | 0 lincRNA          | 15 | 99935384  | 99936798           |
| ENSG00000259592 | 0           | 0.697730409 | pseudogene         | 15 | 35413774  | 35414285           |
| ENSG00000259595 | 1.407729925 | 0.697730409 | antisense          | 15 | 44694883  | 44719342           |
| ENSG00000259597 | 1.799000381 | 2.579085888 | antisense          | 15 | 45799602  | 45800215           |
| ENSG00000259599 | 0.499066092 | 1.16600992  | 3prime_overlapp    | 8  | 28910034  | 28911276           |

|                 |             |             |                   |    |           |                   |
|-----------------|-------------|-------------|-------------------|----|-----------|-------------------|
| ENSG00000259601 | 0.499066092 | 0.390640832 | pseudogene        | 15 | 60163708  | 60165694          |
| ENSG00000259604 | 0           | 0.390640832 | lincRNA           | 15 | 101402048 | 101414195         |
| ENSG00000259605 | 2.35979773  | 2.652276565 | antisense         | 19 | 46268043  | 46272311          |
| ENSG00000259606 | 2.57521082  | 3.32456471  | antisense         | 14 | 75283941  | 75322378          |
| ENSG00000259612 | 2.57521082  | 3.279072565 | pseudogene        | 15 | 53229336  | 53230715          |
| ENSG00000259614 | 0.499066092 | 0.390640832 | pseudogene        | 15 | 96931442  | 96932285          |
| ENSG00000259617 | 0           | 1.16600992  | antisense         | 15 | 41291472  | 41297063          |
| ENSG00000259618 | 0.869158192 | 0.390640832 | lincRNA           | 15 | 50786215  | 50789277          |
| ENSG00000259619 | 0           | 0.390640832 | pseudogene        | 15 | 54340785  | 54343074          |
| ENSG00000259621 | 0.499066092 | 0           | antisense         | 15 | 99423888  | 99436764          |
| ENSG00000259623 | 6.664362065 | 6.866449614 | sense_overlappin  | 17 | 40004770  | 40007699          |
| ENSG00000259630 | 2.471521042 | 3.133298822 | pseudogene        | 15 | 85958398  | 85959083          |
| ENSG00000259632 | 0.869158192 | 0           | pseudogene        | 15 | 52151387  | 52153490          |
| ENSG00000259635 | 1.799000381 | 0           | lincRNA           | 15 | 64993447  | 65011801          |
| ENSG00000259638 | 0           | 0.950786998 | antisense         | 15 | 37316133  | 37322426          |
| ENSG00000259639 | 1.16343121  | 0.950786998 | lincRNA           | 15 | 36231368  | 36544458          |
| ENSG00000259640 | 0.499066092 | 1.16600992  | sense_overlappinX |    | 83755033  | 83757461          |
| ENSG00000259641 | 0           | 0.390640832 | processed_transc  | 15 | 69884468  | 69988089          |
| ENSG00000259642 | 1.616589159 | 1.925536307 | protein_coding    | 15 | 80215113  | 80217194 C15orf37 |
| ENSG00000259643 | 0           | 0.390640832 | processed_transc  | 7  | 101816779 | 101818248         |
| ENSG00000259644 | 1.407729925 | 1.518964905 | sense_intronic    | 15 | 30020390  | 30021735          |
| ENSG00000259645 | 0           | 1.353254395 | sense_intronic    | 15 | 69683531  | 69684488          |
| ENSG00000259648 | 0.499066092 | 0.950786998 | pseudogene        | 14 | 68081646  | 68083343          |
| ENSG00000259649 | 0.499066092 | 0.390640832 | protein_coding    | 15 | 81188532  | 81202118          |
| ENSG00000259650 | 0           | 0.390640832 | antisense         | 15 | 73627601  | 73634728          |
| ENSG00000259652 | 1.407729925 | 0           | lincRNA           | 15 | 77336022  | 77337502          |
| ENSG00000259654 | 0.499066092 | 0           | antisense         | 15 | 85229115  | 85230177          |
| ENSG00000259656 | 1.616589159 | 0.950786998 | non_coding        | 15 | 49393988  | 49395461          |
| ENSG00000259657 | 1.16343121  | 0.950786998 | pseudogene        | 15 | 59968956  | 59969520          |
| ENSG00000259658 | 1.616589159 | 3.608232228 | protein_coding    | 15 | 102277298 | 102285913         |
| ENSG00000259659 | 2.847891871 | 2.788380093 | sense_intronic    | 15 | 44850027  | 44851386          |
| ENSG00000259660 | 1.407729925 | 2.420525079 | processed_transc  | 15 | 102291235 | 102334505         |
| ENSG00000259665 | 0.499066092 | 0           | pseudogene        | 15 | 35373345  | 35373714          |
| ENSG00000259668 | 1.16343121  | 1.802319292 | antisense         | 15 | 51749483  | 51752779          |
| ENSG00000259672 | 0.869158192 | 0.950786998 | lincRNA           | 15 | 63391069  | 63402602          |
| ENSG00000259673 | 3.502389126 | 4.29708397  | lincRNA           | 15 | 67695957  | 67814182          |
| ENSG00000259677 | 0.869158192 | 1.802319292 | pseudogene        | 15 | 90419772  | 90420517          |
| ENSG00000259678 | 0.499066092 | 0           | antisense         | 15 | 51706294  | 51791030          |
| ENSG00000259679 | 0           | 0.390640832 | sense_intronic    | 15 | 52237616  | 52238253          |
| ENSG00000259681 | 0           | 0.390640832 | non_coding        | 15 | 45850796  | 45855075          |
| ENSG00000259683 | 2.57521082  | 2.420525079 | pseudogene        | 15 | 84944427  | 84950601          |
| ENSG00000259684 | 1.407729925 | 1.353254395 | antisense         | 15 | 50849798  | 50852697          |
| ENSG00000259686 | 0.499066092 | 0.697730409 | pseudogene        | 15 | 33304320  | 33305269          |
| ENSG00000259687 | 0.869158192 | 1.353254395 | lincRNA           | 14 | 75761107  | 75763341          |
| ENSG00000259696 | 0.499066092 | 0.390640832 | pseudogene        | 15 | 31745346  | 31746342          |
| ENSG00000259698 | 0           | 0.390640832 | pseudogene        | 15 | 21224717  | 21226180          |
| ENSG00000259705 | 0.499066092 | 0           | lincRNA           | 15 | 48938148  | 48944213          |
| ENSG00000259706 | 2.57521082  | 2.721932731 | pseudogene        | 15 | 99797837  | 99800220 HSP90B2P |
| ENSG00000259708 | 0.869158192 | 0.390640832 | antisense         | 15 | 78542844  | 78556498          |
| ENSG00000259709 | 1.616589159 | 1.518964905 | antisense         | 15 | 52416758  | 52432443          |
| ENSG00000259711 | 0.869158192 | 0.697730409 | lincRNA           | 16 | 54968825  | 54988577          |
| ENSG00000259712 | 3.554067925 | 3.993387124 | non_coding        | 15 | 52348872  | 52392720          |
| ENSG00000259715 | 3.004694206 | 3.532712221 | non_coding        | 15 | 50651647  | 50652391          |
| ENSG00000259717 | 1.407729925 | 1.16600992  | protein_coding    | 14 | 103587184 | 103589344         |
| ENSG00000259722 | 0.499066092 | 0           | pseudogene        | 15 | 77496920  | 77497442          |
| ENSG00000259725 | 0.499066092 | 0.390640832 | antisense         | 16 | 54971698  | 54972583          |
| ENSG00000259726 | 2.35979773  | 3.453019579 | pseudogene        | 15 | 84855504  | 84866136          |
| ENSG00000259727 | 1.799000381 | 3.133298822 | lincRNA           | 15 | 63188011  | 63191742          |
| ENSG00000259728 | 1.616589159 | 1.518964905 | pseudogene        | 15 | 85113880  | 85123406          |
| ENSG00000259729 | 0.499066092 | 1.16600992  | processed_transc  | 20 | 35141012  | 35154533          |
| ENSG00000259732 | 2.10647801  | 1.667587519 | sense_overlappin  | 15 | 59413233  | 59425449          |
| ENSG00000259735 | 0.869158192 | 0.697730409 | sense_intronic    | 15 | 59640847  | 59652088          |
| ENSG00000259736 | 0.869158192 | 0.390640832 | antisense         | 15 | 91163239  | 91260372          |

|                 |             |             |                  |    |           |           |          |
|-----------------|-------------|-------------|------------------|----|-----------|-----------|----------|
| ENSG00000259744 | 0.869158192 | 1.667587519 | antisense        | 15 | 71141222  | 71142109  |          |
| ENSG00000259746 | 0.499066092 | 0.697730409 | pseudogene       | 15 | 91177957  | 91178265  |          |
| ENSG00000259748 | 3.448790144 | 4.101879561 | non_coding       | 15 | 52206915  | 52207768  |          |
| ENSG00000259751 | 2.471521042 | 2.039052734 | pseudogene       | 15 | 35141338  | 35142596  |          |
| ENSG00000259758 | 9.264821181 | 8.993663261 | antisense        | 8  | 141530255 | 141539600 |          |
| ENSG00000259760 | 0           | 0.390640832 | antisense        | 15 | 99936818  | 99941520  |          |
| ENSG00000259762 | 1.16343121  | 1.16600992  | antisense        | 15 | 86293567  | 86296132  |          |
| ENSG00000259764 | 0           | 0.390640832 | antisense        | 15 | 101874642 | 101877633 |          |
| ENSG00000259767 | 0.869158192 | 1.16600992  | sense_intronic   | 15 | 83690988  | 83693088  |          |
| ENSG00000259768 | 3.004694206 | 3.081239798 | processed_transc | 16 | 72779302  | 72821143  |          |
| ENSG00000259771 | 0.499066092 | 1.353254395 | sense_intronic   | 15 | 59558919  | 59563361  |          |
| ENSG00000259772 | 0.869158192 | 0.697730409 | processed_transc | 15 | 31514202  | 31523041  |          |
| ENSG00000259774 | 2.471521042 | 3.081239798 | lincRNA          | 15 | 84977316  | 84980581  |          |
| ENSG00000259775 | 0.869158192 | 0           | antisense        | 14 | 103798011 | 103798704 |          |
| ENSG00000259780 | 0.499066092 | 0.697730409 | lincRNA          | 16 | 2285690   | 2286914   |          |
| ENSG00000259781 | 3.211941663 | 3.133298822 | pseudogene       | 15 | 71457109  | 71457754  |          |
| ENSG00000259782 | 0.869158192 | 0.390640832 | sense_intronic   | 16 | 23457791  | 23458603  |          |
| ENSG00000259783 | 0           | 0.390640832 | lincRNA          | 15 | 72900828  | 72929260  |          |
| ENSG00000259787 | 0.499066092 | 0.390640832 | sense_overlappin | 5  | 143861871 | 143865249 |          |
| ENSG00000259790 | 2.10647801  | 1.16600992  | pseudogene       | 15 | 75613738  | 75615034  | ANP32BP1 |
| ENSG00000259791 | 0           | 0.390640832 | lincRNA          | 16 | 34874400  | 34874953  |          |
| ENSG00000259792 | 0.499066092 | 0.697730409 | antisense        | 15 | 78285747  | 78287631  |          |
| ENSG00000259796 | 1.616589159 | 0.390640832 | sense_overlappin | 14 | 62577593  | 62579268  |          |
| ENSG00000259797 | 0.869158192 | 1.518964905 | sense_intronic   | 16 | 68350704  | 68352939  |          |
| ENSG00000259798 | 0.499066092 | 0           | antisense        | 16 | 71147255  | 71147903  |          |
| ENSG00000259799 | 3.698846687 | 3.906303962 | antisense        | 11 | 68923378  | 68927220  |          |
| ENSG00000259802 | 4.230497448 | 3.781359661 | antisense        | 5  | 10352813  | 10353713  |          |
| ENSG00000259803 | 5.124761037 | 4.15321211  | antisense        | 16 | 89262559  | 89266726  |          |
| ENSG00000259804 | 1.407729925 | 1.925536307 | antisense        | 16 | 67595314  | 67596212  |          |
| ENSG00000259806 | 4.292665995 | 3.679994897 | lincRNA          | 16 | 23683256  | 23686820  |          |
| ENSG00000259807 | 0           | 0.390640832 | lincRNA          | 16 | 29228491  | 29231352  |          |
| ENSG00000259810 | 1.616589159 | 1.802319292 | 3prime_overlapp  | 16 | 31799523  | 31801961  |          |
| ENSG00000259814 | 1.616589159 | 0           | lincRNA          | 15 | 29901880  | 29903416  |          |
| ENSG00000259818 | 1.407729925 | 0.950786998 | antisense        | 1  | 53686335  | 53689925  |          |
| ENSG00000259820 | 4.800350936 | 5.620622115 | lincRNA          | 8  | 135804263 | 135810515 |          |
| ENSG00000259822 | 0.499066092 | 0.390640832 | pseudogene       | 16 | 32290193  | 32290657  |          |
| ENSG00000259826 | 2.57521082  | 2.721932731 | antisense        | 7  | 39987121  | 39989354  |          |
| ENSG00000259834 | 0.499066092 | 1.802319292 | lincRNA          | 1  | 111196182 | 111199662 |          |
| ENSG00000259838 | 0.499066092 | 0.390640832 | pseudogene       | 15 | 41849225  | 41849633  | TCEB1P2  |
| ENSG00000259840 | 1.616589159 | 1.518964905 | lincRNA          | 16 | 760746    | 761277    |          |
| ENSG00000259844 | 0           | 0.390640832 | pseudogene       | 16 | 60688139  | 60690553  | GNPATP   |
| ENSG00000259845 | 2.35979773  | 1.925536307 | pseudogene       | 15 | 31107474  | 31136356  |          |
| ENSG00000259848 | 3.211941663 | 3.279072565 | lincRNA          | 2  | 95533231  | 95613086  |          |
| ENSG00000259850 | 9.260938843 | 8.73189842  | lincRNA          | 17 | 17091982  | 17095962  |          |
| ENSG00000259856 | 0.869158192 | 0.390640832 | pseudogene       | 16 | 46660316  | 46660904  | RAB43P1  |
| ENSG00000259860 | 2.671945279 | 2.971122874 | antisense        | 16 | 56385798  | 56387436  |          |
| ENSG00000259865 | 5.729976786 | 6.299096252 | lincRNA          | 1  | 247350583 | 247351828 |          |
| ENSG00000259867 | 1.16343121  | 3.368666104 | antisense        | 16 | 80188950  | 80597032  |          |
| ENSG00000259869 | 3.146112541 | 5.018301917 | lincRNA          | 10 | 43246626  | 43247593  |          |
| ENSG00000259876 | 0.499066092 | 0.697730409 | antisense        | 16 | 12650210  | 12651551  |          |
| ENSG00000259877 | 3.989024711 | 4.547834947 | antisense        | 16 | 89281638  | 89284061  |          |
| ENSG00000259881 | 0.499066092 | 0.390640832 | antisense        | 16 | 88947446  | 88953544  |          |
| ENSG00000259883 | 1.616589159 | 0.697730409 | antisense        | 15 | 42213615  | 42221081  |          |
| ENSG00000259884 | 5.360713447 | 0.390640832 | lincRNA          | 12 | 52452243  | 52453287  |          |
| ENSG00000259886 | 0           | 0.390640832 | lincRNA          | X  | 152689210 | 152691934 |          |
| ENSG00000259891 | 3.077135474 | 3.714580548 | antisense        | 8  | 141515912 | 141518142 |          |
| ENSG00000259894 | 0.499066092 | 0.390640832 | lincRNA          | 15 | 90788645  | 90789043  |          |
| ENSG00000259895 | 1.407729925 | 2.851901313 | antisense        | 16 | 2514951   | 2518214   |          |
| ENSG00000259899 | 0           | 0.390640832 | antisense        | 16 | 12654613  | 12704901  |          |
| ENSG00000259901 | 6.760987087 | 6.754561598 | antisense        | 16 | 72823142  | 72825522  |          |
| ENSG00000259904 | 0.499066092 | 0.390640832 | pseudogene       | 15 | 34665742  | 34666804  |          |
| ENSG00000259907 | 0           | 0.390640832 | lincRNA          | 14 | 71648173  | 71648823  |          |
| ENSG00000259910 | 0.869158192 | 0.697730409 | antisense        | 16 | 1209548   | 1210176   |          |

|                 |             |             |                  |    |           |                    |
|-----------------|-------------|-------------|------------------|----|-----------|--------------------|
| ENSG00000259915 | 0.499066092 | 0.697730409 | lincRNA          | 2  | 187219299 | 187221500          |
| ENSG00000259917 | 2.847891871 | 1.518964905 | pseudogene       | 15 | 34781203  | 34782772           |
| ENSG00000259918 | 0.869158192 | 0.390640832 | pseudogene       | 16 | 47632565  | 47632907           |
| ENSG00000259921 | 1.799000381 | 1.518964905 | sense_intronic   | 15 | 99697436  | 99701345           |
| ENSG00000259924 | 0.499066092 | 0.697730409 | pseudogene       | 15 | 66063514  | 66064477           |
| ENSG00000259925 | 0.499066092 | 0.390640832 | lincRNA          | 16 | 19354969  | 19413015           |
| ENSG00000259926 | 0           | 0.390640832 | sense_intronic   | 16 | 53482660  | 53483502           |
| ENSG00000259931 | 0.499066092 | 0           | pseudogene       | 15 | 75805110  | 75805381           |
| ENSG00000259933 | 1.16343121  | 2.334191469 | sense_overlappin | 16 | 2141437   | 2145426            |
| ENSG00000259935 | 0.499066092 | 0.390640832 | sense_intronic   | 15 | 52940831  | 52942063           |
| ENSG00000259940 | 1.616589159 | 1.16600992  | antisense        | 16 | 27224631  | 27226314           |
| ENSG00000259942 | 1.407729925 | 1.16600992  | lincRNA          | 10 | 47656084  | 47657233           |
| ENSG00000259943 | 4.842525946 | 5.742946029 | antisense        | 1  | 40722099  | 40723639           |
| ENSG00000259946 | 0           | 0.390640832 | lincRNA          | 1  | 98432561  | 98434370           |
| ENSG00000259949 | 0           | 0.390640832 | lincRNA          | 17 | 75543023  | 75561115           |
| ENSG00000259950 | 0           | 0.697730409 | pseudogene       | 16 | 31905863  | 31906304           |
| ENSG00000259953 | 5.036678094 | 4.319727133 | sense_overlappin | 9  | 114794835 | 114800010          |
| ENSG00000259954 | 0           | 0.390640832 | antisense        | 16 | 27458990  | 27464714           |
| ENSG00000259959 | 5.375152132 | 5.03207928  | lincRNA          | 4  | 47842139  | 47846356           |
| ENSG00000259964 | 0           | 0.390640832 | processed_transc | 15 | 71439989  | 71481381           |
| ENSG00000259967 | 0           | 0.390640832 | lincRNA          | 15 | 80458265  | 80459322           |
| ENSG00000259972 | 3.554067925 | 4.127774132 | processed_transc | 16 | 74339100  | 74369244           |
| ENSG00000259974 | 1.407729925 | 0           | processed_transc | 20 | 22541191  | 22559280 LINC00261 |
| ENSG00000259976 | 5.718698586 | 6.149127429 | lincRNA          | 3  | 114033348 | 114035026          |
| ENSG00000259979 | 0           | 0.390640832 | pseudogene       | 16 | 34352609  | 34353327 VN1R68P   |
| ENSG00000259982 | 1.407729925 | 1.518964905 | pseudogene       | 16 | 28711615  | 28712861 CDC37P1   |
| ENSG00000259984 | 0.499066092 | 0           | pseudogene       | 1  | 25662920  | 25663956           |
| ENSG00000259985 | 3.502389126 | 4.17820932  | antisense        | 18 | 29265618  | 29266786           |
| ENSG00000259994 | 4.292665995 | 4.777836593 | sense_overlappin | 10 | 30591755  | 30594995           |
| ENSG00000259999 | 0.499066092 | 0           | processed_transc | 16 | 75355788  | 75358946           |
| ENSG00000260000 | 2.238690726 | 3.183544561 | antisense        | 6  | 101329347 | 101330847          |
| ENSG00000260001 | 4.19837882  | 4.274079748 | protein_coding   | 19 | 7981030   | 7983982            |
| ENSG00000260005 | 3.335220907 | 2.971122874 | processed_transc | 17 | 79203141  | 79206006           |
| ENSG00000260006 | 5.472368541 | 4.342020395 | lincRNA          | 2  | 201689396 | 201692061          |
| ENSG00000260008 | 1.16343121  | 0           | sense_overlappin | 11 | 101978617 | 101980573          |
| ENSG00000260009 | 0           | 0.390640832 | lincRNA          | 16 | 14456966  | 14464123           |
| ENSG00000260011 | 0.499066092 | 1.518964905 | lincRNA          | 17 | 80338986  | 80339220           |
| ENSG00000260012 | 0           | 0.697730409 | pseudogene       | 16 | 47296652  | 47297411           |
| ENSG00000260015 | 1.16343121  | 0.697730409 | antisense        | 16 | 71573737  | 71575728           |
| ENSG00000260017 | 0.499066092 | 0.697730409 | antisense        | 16 | 18814405  | 18823503           |
| ENSG00000260018 | 3.077135474 | 4.226940739 | antisense        | 16 | 84150656  | 84151176           |
| ENSG00000260022 | 1.407729925 | 1.16600992  | antisense        | 16 | 933780    | 935090             |
| ENSG00000260023 | 5.036678094 | 4.363974406 | lincRNA          | 16 | 70610204  | 70611571           |
| ENSG00000260025 | 2.35979773  | 3.32456471  | lincRNA          | 2  | 36581892  | 36582257           |
| ENSG00000260027 | 0.499066092 | 0           | processed_transc | 17 | 46684989  | 46716647           |
| ENSG00000260032 | 11.88598105 | 11.82058755 | lincRNA          | 20 | 34633544  | 34638882           |
| ENSG00000260033 | 0.499066092 | 0.950786998 | pseudogene       | 16 | 48634087  | 48634555           |
| ENSG00000260034 | 2.762599152 | 2.420525079 | antisense        | 16 | 25151898  | 25160353           |
| ENSG00000260036 | 0           | 0.390640832 | pseudogene       | 15 | 55734833  | 55735555           |
| ENSG00000260037 | 0.869158192 | 1.16600992  | lincRNA          | 15 | 72110737  | 72115725           |
| ENSG00000260038 | 0.499066092 | 1.802319292 | sense_intronic   | 16 | 57281262  | 57282404           |
| ENSG00000260044 | 0.869158192 | 1.16600992  | sense_overlappin | 18 | 44383187  | 44383857           |
| ENSG00000260046 | 1.407729925 | 1.353254395 | lincRNA          | 14 | 45838418  | 45840042           |
| ENSG00000260047 | 0.499066092 | 0           | pseudogene       | 16 | 32881306  | 32883370           |
| ENSG00000260051 | 4.712111592 | 4.990346085 | antisense        | 16 | 1501761   | 1502654            |
| ENSG00000260052 | 0.499066092 | 0.697730409 | lincRNA          | 16 | 48671054  | 48672630           |
| ENSG00000260054 | 8.278730502 | 7.809160246 | lincRNA          | 7  | 6694495   | 6696063            |
| ENSG00000260059 | 1.407729925 | 1.353254395 | lincRNA          | 2  | 139357233 | 139359996          |
| ENSG00000260060 | 2.762599152 | 1.667587519 | antisense        | 16 | 31207452  | 31208284           |
| ENSG00000260062 | 0           | 0.950786998 | pseudogene       | 15 | 62545929  | 62562879           |
| ENSG00000260063 | 1.407729925 | 2.420525079 | antisense        | 1  | 27018623  | 27020622           |
| ENSG00000260064 | 0.499066092 | 0           | sense_intronic   | 16 | 80661448  | 80662276           |
| ENSG00000260065 | 5.175139844 | 4.872768657 | lincRNA          | 22 | 26917949  | 26921002           |

|                 |             |             |                  |    |           |                  |
|-----------------|-------------|-------------|------------------|----|-----------|------------------|
| ENSG00000260070 | 0           | 0.390640832 | antisense        | 7  | 36359384  | 36360088         |
| ENSG00000260077 | 4.381167248 | 3.935919592 | lincRNA          | 2  | 10179219  | 10180790         |
| ENSG00000260081 | 1.407729925 | 3.368666104 | antisense        | X  | 152864795 | 152869808        |
| ENSG00000260082 | 1.799000381 | 1.802319292 | pseudogene       | 16 | 30832389  | 30833431         |
| ENSG00000260083 | 3.911897206 | 4.547834947 | antisense        | 16 | 30886543  | 30906541 MIR4519 |
| ENSG00000260084 | 0.499066092 | 0.697730409 | lincRNA          | 16 | 68607685  | 68623415         |
| ENSG00000260086 | 1.407729925 | 0.697730409 | ncrna_host       | 16 | 48657347  | 48778553         |
| ENSG00000260088 | 0.869158192 | 0.950786998 | processed_transc | 1  | 200638635 | 200663378        |
| ENSG00000260091 | 2.928422289 | 1.802319292 | lincRNA          | 4  | 120330488 | 120331388        |
| ENSG00000260093 | 0.499066092 | 1.16600992  | antisense        | 8  | 9907995   | 9911764          |
| ENSG00000260095 | 3.211941663 | 2.420525079 | antisense        | 16 | 2502582   | 2502978          |
| ENSG00000260100 | 0.499066092 | 0.390640832 | lincRNA          | 9  | 37078810  | 37079773         |
| ENSG00000260101 | 1.16343121  | 0.950786998 | lincRNA          | 2  | 64749321  | 64751227         |
| ENSG00000260103 | 1.616589159 | 1.353254395 | pseudogene       | 15 | 74770411  | 74782627         |
| ENSG00000260105 | 2.238690726 | 1.16600992  | pseudogene       | 17 | 41017939  | 41026386         |
| ENSG00000260110 | 9.300246031 | 8.915915748 | lincRNA          | 17 | 27873905  | 27878921         |
| ENSG00000260112 | 0.499066092 | 0.697730409 | pseudogene       | 19 | 9628826   | 9630017          |
| ENSG00000260114 | 5.695874189 | 5.98174124  | sense_intronic   | 16 | 29930957  | 29933226         |
| ENSG00000260118 | 1.16343121  | 0.950786998 | lincRNA          | X  | 67233312  | 67234743         |
| ENSG00000260121 | 5.695874189 | 6.304782526 | antisense        | 16 | 88785023  | 88786867         |
| ENSG00000260123 | 0           | 0.390640832 | lincRNA          | 15 | 89584454  | 89626050         |
| ENSG00000260124 | 2.671945279 | 2.039052734 | sense_overlappin | 20 | 47980423  | 47984296         |
| ENSG00000260126 | 0.499066092 | 0           | lincRNA          | 16 | 16752084  | 16757992         |
| ENSG00000260128 | 0.869158192 | 0.697730409 | pseudogene       | 15 | 30864941  | 30892850         |
| ENSG00000260131 | 0.499066092 | 0           | antisense        | 13 | 20755670  | 20756081         |
| ENSG00000260132 | 0           | 0.950786998 | antisense        | 16 | 1458835   | 1462249          |
| ENSG00000260136 | 1.616589159 | 2.579085888 | lincRNA          | 16 | 23464079  | 23468927         |
| ENSG00000260139 | 0.869158192 | 0           | pseudogene       | 15 | 78187026  | 78197016         |
| ENSG00000260141 | 0.869158192 | 0           | lincRNA          | 16 | 33054930  | 33106752         |
| ENSG00000260144 | 1.960915222 | 0.390640832 | pseudogene       | 15 | 72897524  | 72904667         |
| ENSG00000260145 | 1.16343121  | 1.353254395 | antisense        | 16 | 57086417  | 57092409         |
| ENSG00000260146 | 0           | 0.697730409 | pseudogene       | 16 | 66484901  | 66485254         |
| ENSG00000260152 | 0           | 0.697730409 | pseudogene       | 15 | 75406602  | 75407210         |
| ENSG00000260154 | 2.762599152 | 3.133298822 | antisense        | 16 | 31105048  | 31107265         |
| ENSG00000260156 | 1.616589159 | 0.697730409 | antisense        | 16 | 70780960  | 70781829         |
| ENSG00000260160 | 5.239686603 | 5.620622115 | sense_overlappin | 19 | 52561743  | 52566956         |
| ENSG00000260161 | 0           | 0.390640832 | pseudogene       | 16 | 82154243  | 82155374         |
| ENSG00000260166 | 0           | 0.390640832 | processed_transc | 16 | 88120993  | 88121538         |
| ENSG00000260167 | 1.799000381 | 2.334191469 | antisense        | 16 | 30597228  | 30619914         |
| ENSG00000260174 | 0.499066092 | 0           | pseudogene       | 15 | 30336658  | 30337499         |
| ENSG00000260175 | 0.499066092 | 0.950786998 | protein_coding   | 14 | 23744696  | 23768656         |
| ENSG00000260177 | 0.869158192 | 0.697730409 | processed_transc | 16 | 87813740  | 87840082         |
| ENSG00000260179 | 2.35979773  | 2.501982735 | lincRNA          | 1  | 1185157   | 1186714          |
| ENSG00000260180 | 0           | 0.390640832 | processed_transc | 17 | 74946556  | 74965238         |
| ENSG00000260183 | 0.499066092 | 0.390640832 | antisense        | 16 | 80581739  | 80586411         |
| ENSG00000260185 | 0.499066092 | 0.697730409 | antisense        | 16 | 71688930  | 71698115         |
| ENSG00000260186 | 4.261916566 | 4.976162367 | lincRNA          | 16 | 58455230  | 58496374         |
| ENSG00000260190 | 2.238690726 | 2.039052734 | sense_overlappin | 9  | 139831621 | 139832440        |
| ENSG00000260193 | 3.603959378 | 2.912743273 | processed_transc | 9  | 138999654 | 139001270        |
| ENSG00000260194 | 0           | 0.697730409 | antisense        | 16 | 54032225  | 54033881         |
| ENSG00000260196 | 6.252103507 | 6.862599506 | antisense        | 11 | 17402196  | 17405078         |
| ENSG00000260198 | 1.799000381 | 1.925536307 | sense_intronic   | 16 | 56334528  | 56336816         |
| ENSG00000260203 | 1.16343121  | 0.697730409 | antisense        | 16 | 30418950  | 30440920         |
| ENSG00000260206 | 0           | 0.390640832 | antisense        | 15 | 75928480  | 75931580         |
| ENSG00000260209 | 2.10647801  | 2.242360793 | lincRNA          | 11 | 125742926 | 125744423        |
| ENSG00000260210 | 0.499066092 | 0.390640832 | lincRNA          | 16 | 18608215  | 18609650         |
| ENSG00000260213 | 2.671945279 | 2.242360793 | antisense        | 16 | 81050397  | 81069364         |
| ENSG00000260214 | 4.230497448 | 5.306006045 | sense_overlappin | 7  | 19037466  | 19042039         |
| ENSG00000260219 | 2.35979773  | 2.579085888 | processed_transc | 16 | 30366762  | 30367848         |
| ENSG00000260229 | 1.16343121  | 1.16600992  | pseudogene       | 16 | 81509628  | 81510124         |
| ENSG00000260231 | 5.525114348 | 5.656642807 | antisense        | 7  | 139877061 | 139879440        |
| ENSG00000260233 | 3.335220907 | 3.679994897 | processed_transc | 11 | 65335953  | 65337894         |
| ENSG00000260236 | 2.928422289 | 3.64455972  | antisense        | 3  | 47420579  | 47422489         |

|                 |             |             |                  |    |           |           |         |
|-----------------|-------------|-------------|------------------|----|-----------|-----------|---------|
| ENSG00000260238 | 0           | 0.390640832 | protein_coding   | 1  | 156182773 | 156213123 |         |
| ENSG00000260244 | 0           | 1.16600992  | sense_overlappin | 4  | 156655600 | 156658214 |         |
| ENSG00000260248 | 1.16343121  | 1.925536307 | sense_overlappin | 17 | 71171622  | 71172772  |         |
| ENSG00000260249 | 0.869158192 | 0.950786998 | antisense        | 16 | 50700122  | 50705554  |         |
| ENSG00000260252 | 0.499066092 | 0.950786998 | antisense        | 16 | 72118756  | 72121342  |         |
| ENSG00000260253 | 0.499066092 | 0.950786998 | sense_overlappin | 8  | 29209937  | 29210687  |         |
| ENSG00000260257 | 6.0776925   | 6.044260771 | lincRNA          | 20 | 31444848  | 31446557  |         |
| ENSG00000260259 | 1.960915222 | 2.788380093 | protein_coding   | 16 | 89749028  | 89752977  |         |
| ENSG00000260260 | 5.909333162 | 7.551403417 | lincRNA          | 16 | 2204798   | 2205359   |         |
| ENSG00000260261 | 5.806547963 | 6.002883551 | lincRNA          | 3  | 195676059 | 195679566 |         |
| ENSG00000260262 | 0           | 0.390640832 | lincRNA          | 4  | 830300    | 831012    |         |
| ENSG00000260263 | 2.762599152 | 2.144285137 | sense_overlappin | 18 | 18526867  | 18528428  |         |
| ENSG00000260267 | 6.567100227 | 6.1803943   | antisense        | 16 | 31468032  | 31471057  |         |
| ENSG00000260269 | 2.10647801  | 1.518964905 | processed_transc | 15 | 75819491  | 75893546  |         |
| ENSG00000260273 | 0.499066092 | 0.697730409 | antisense        | 6  | 109703998 | 109704869 |         |
| ENSG00000260274 | 1.16343121  | 3.453019579 | lincRNA          | 15 | 75660496  | 75661925  |         |
| ENSG00000260276 | 4.409500985 | 4.101879561 | antisense        | 16 | 8941962   | 8954274   |         |
| ENSG00000260277 | 1.407729925 | 0.950786998 | antisense        | 16 | 22094577  | 22103552  |         |
| ENSG00000260278 | 1.16343121  | 0           | antisense        | 4  | 79694808  | 79697127  |         |
| ENSG00000260279 | 3.146112541 | 3.411459265 | antisense        | 16 | 89363916  | 89364724  |         |
| ENSG00000260281 | 0.869158192 | 0.697730409 | antisense        | 16 | 47178234  | 47196658  |         |
| ENSG00000260284 | 4.165528823 | 1.802319292 | pseudogene       | 16 | 1336352   | 1338838   | PRSS29P |
| ENSG00000260285 | 4.77879189  | 4.547834947 | antisense        | 14 | 103991347 | 103995409 |         |
| ENSG00000260286 | 0           | 0.697730409 | protein_coding   | 6  | 24797549  | 24799117  |         |
| ENSG00000260288 | 0.869158192 | 0.390640832 | processed_transc | 15 | 76030161  | 76055662  |         |
| ENSG00000260290 | 4.131913373 | 3.993387124 | pseudogene       | 16 | 69790442  | 69791840  |         |
| ENSG00000260292 | 0.499066092 | 0.950786998 | antisense        | 16 | 23511510  | 23511761  |         |
| ENSG00000260293 | 0.499066092 | 0.950786998 | sense_intronic   | 16 | 2526559   | 2527062   |         |
| ENSG00000260296 | 0.499066092 | 0.950786998 | sense_overlappin | 4  | 40168295  | 40169451  |         |
| ENSG00000260297 | 0.499066092 | 0           | antisense        | 16 | 70295384  | 70392899  |         |
| ENSG00000260300 | 1.960915222 | 1.16600992  | processed_transc | 16 | 83941738  | 83985058  |         |
| ENSG00000260302 | 0.499066092 | 1.925536307 | lincRNA          | 18 | 12774650  | 12775922  |         |
| ENSG00000260303 | 0           | 0.697730409 | lincRNA          | 4  | 146973756 | 146977914 |         |
| ENSG00000260306 | 0.499066092 | 0.697730409 | lincRNA          | 16 | 21805416  | 21807080  |         |
| ENSG00000260310 | 0.499066092 | 0.697730409 | sense_intronic   | 16 | 10670356  | 10672040  |         |
| ENSG00000260316 | 1.407729925 | 2.039052734 | sense_intronic   | 16 | 950520    | 955224    |         |
| ENSG00000260317 | 3.744048221 | 3.411459265 | lincRNA          | 8  | 81453535  | 81455339  |         |
| ENSG00000260318 | 1.799000381 | 1.16600992  | pseudogene       | 16 | 11997780  | 11997994  | COX6CP1 |
| ENSG00000260326 | 0.499066092 | 0.697730409 | pseudogene       | 16 | 52968725  | 52969547  |         |
| ENSG00000260328 | 3.78787645  | 0.950786998 | lincRNA          | 17 | 16915228  | 16918304  |         |
| ENSG00000260329 | 2.762599152 | 3.570966319 | antisense        | 12 | 107347807 | 107349275 |         |
| ENSG00000260330 | 1.407729925 | 1.802319292 | sense_overlappin | 16 | 68057186  | 68058323  |         |
| ENSG00000260331 | 0           | 0.697730409 | lincRNA          | 2  | 18728652  | 18729470  |         |
| ENSG00000260335 | 0.499066092 | 0           | pseudogene       | 16 | 29460512  | 29460946  |         |
| ENSG00000260336 | 8.666918882 | 8.151264044 | sense_overlappin | 7  | 100737328 | 100741248 |         |
| ENSG00000260339 | 0.499066092 | 0.390640832 | antisense        | 15 | 72668454  | 72671129  |         |
| ENSG00000260342 | 0           | 0.697730409 | protein_coding   | 16 | 18799360  | 18812841  |         |
| ENSG00000260347 | 2.671945279 | 2.652276565 | pseudogene       | 16 | 48530901  | 48532512  | MOCS1P1 |
| ENSG00000260349 | 6.585843317 | 5.751299057 | antisense        | 16 | 9199691   | 9201031   |         |
| ENSG00000260350 | 0.499066092 | 0.390640832 | antisense        | 16 | 8941507   | 8942581   |         |
| ENSG00000260351 | 0.869158192 | 0           | antisense        | 15 | 83691323  | 83759534  |         |
| ENSG00000260352 | 1.960915222 | 1.667587519 | antisense        | 16 | 18938185  | 18948365  |         |
| ENSG00000260356 | 3.004694206 | 2.971122874 | antisense        | 3  | 180698226 | 180700537 |         |
| ENSG00000260357 | 1.616589159 | 0.697730409 | pseudogene       | 15 | 75592294  | 75595306  | DNM1P34 |
| ENSG00000260359 | 0.869158192 | 0           | lincRNA          | 15 | 95024040  | 95027181  |         |
| ENSG00000260360 | 0           | 0.950786998 | lincRNA          | 1  | 179922319 | 179923575 |         |
| ENSG00000260361 | 2.471521042 | 2.334191469 | lincRNA          | 15 | 93322987  | 93324722  |         |
| ENSG00000260366 | 0.499066092 | 0           | sense_overlappin | 19 | 49429428  | 49429701  |         |
| ENSG00000260367 | 3.502389126 | 3.64455972  | antisense        | 16 | 28986294  | 28990145  |         |
| ENSG00000260368 | 2.10647801  | 1.667587519 | sense_overlappin | 8  | 101925475 | 101926616 |         |
| ENSG00000260369 | 1.799000381 | 1.353254395 | lincRNA          | 17 | 78427535  | 78428529  |         |
| ENSG00000260378 | 0.499066092 | 1.16600992  | antisense        | 16 | 12839730  | 12851692  |         |
| ENSG00000260381 | 0.499066092 | 1.802319292 | processed_transc | 16 | 50134250  | 50186967  |         |



|                 |             |             |                  |    |           |                  |
|-----------------|-------------|-------------|------------------|----|-----------|------------------|
| ENSG00000260382 | 1.407729925 | 0.390640832 | pseudogene       | 15 | 31174470  | 31175434         |
| ENSG00000260388 | 1.16343121  | 0.950786998 | lincRNA          | 13 | 48504290  | 48506757         |
| ENSG00000260389 | 1.407729925 | 0.390640832 | pseudogene       | 18 | 30091626  | 30094597 WBP11P1 |
| ENSG00000260394 | 2.35979773  | 1.16600992  | antisense        | 16 | 728504    | 729777           |
| ENSG00000260395 | 0.499066092 | 0           | pseudogene       | 16 | 22009631  | 22010977         |
| ENSG00000260396 | 2.10647801  | 1.667587519 | lincRNA          | 2  | 20877569  | 20879005         |
| ENSG00000260397 | 3.698846687 | 3.411459265 | processed_transc | 8  | 82608603  | 82610929         |
| ENSG00000260400 | 1.799000381 | 1.518964905 | sense_overlappin | 10 | 70458257  | 70460551         |
| ENSG00000260401 | 7.218789138 | 5.187895122 | sense_overlappin | 11 | 72950020  | 72953380         |
| ENSG00000260403 | 1.16343121  | 0.950786998 | antisense        | 16 | 1206976   | 1207974          |
| ENSG00000260404 | 6.305850085 | 6.343971006 | processed_transc | 4  | 119512928 | 119556134        |
| ENSG00000260409 | 0.499066092 | 0.697730409 | lincRNA          | 15 | 20935076  | 20961512         |
| ENSG00000260410 | 0.869158192 | 0.697730409 | pseudogene       | 16 | 84152898  | 84154784         |
| ENSG00000260416 | 0           | 0.390640832 | lincRNA          | 20 | 61758847  | 61760811         |
| ENSG00000260417 | 2.671945279 | 3.232099092 | sense_overlappin | 16 | 85625872  | 85629326         |
| ENSG00000260421 | 5.899377978 | 6.117167886 | sense_intronic   | 16 | 29924465  | 29926658         |
| ENSG00000260423 | 2.847891871 | 3.368666104 | processed_transc | 12 | 9520060   | 9550213          |
| ENSG00000260425 | 0           | 2.039052734 | antisense        | 16 | 1408901   | 1411406          |
| ENSG00000260430 | 4.097495944 | 3.906303962 | lincRNA          | 16 | 19098178  | 19109432         |
| ENSG00000260431 | 0           | 0.390640832 | pseudogene       | 16 | 5257089   | 5257435          |
| ENSG00000260432 | 1.960915222 | 3.368666104 | lincRNA          | 16 | 9847272   | 9851895          |
| ENSG00000260436 | 0.869158192 | 0.950786998 | antisense        | 16 | 2621571   | 2622354          |
| ENSG00000260439 | 1.407729925 | 1.925536307 | antisense        | 16 | 971033    | 984495           |
| ENSG00000260441 | 0           | 0.390640832 | antisense        | 16 | 68290065  | 68294346         |
| ENSG00000260442 | 3.077135474 | 4.547834947 | antisense        | 16 | 28890278  | 28891241         |
| ENSG00000260443 | 0.499066092 | 0.390640832 | pseudogene       | 16 | 87978664  | 87978808         |
| ENSG00000260447 | 0.499066092 | 1.16600992  | antisense        | 16 | 2169208   | 2170249          |
| ENSG00000260448 | 1.799000381 | 2.334191469 | lincRNA          | 16 | 25096913  | 25122876         |
| ENSG00000260452 | 0           | 0.697730409 | pseudogene       | 16 | 28122494  | 28122968         |
| ENSG00000260454 | 2.671945279 | 2.652276565 | lincRNA          | 9  | 93759336  | 93764153         |
| ENSG00000260456 | 3.393122761 | 3.608232228 | protein_coding   | 16 | 87117168  | 87351022         |
| ENSG00000260459 | 1.16343121  | 0           | pseudogene       | 16 | 68856470  | 68857022         |
| ENSG00000260461 | 3.744048221 | 3.493416095 | sense_overlappin | 10 | 105637132 | 105639519        |
| ENSG00000260464 | 1.616589159 | 2.420525079 | lincRNA          | 1  | 94312730  | 94314495         |
| ENSG00000260466 | 2.762599152 | 0.950786998 | processed_transc | 16 | 87870138  | 87871269         |
| ENSG00000260468 | 1.16343121  | 0           | lincRNA          | 16 | 10608699  | 10622059         |
| ENSG00000260470 | 2.35979773  | 3.32456471  | lincRNA          | 12 | 54538853  | 54541009         |
| ENSG00000260471 | 0           | 0.390640832 | pseudogene       | 16 | 74254828  | 74255326         |
| ENSG00000260475 | 1.616589159 | 2.039052734 | antisense        | 10 | 101380812 | 101381675        |
| ENSG00000260482 | 5.948480845 | 5.620622115 | lincRNA          | 16 | 23681332  | 23684448         |
| ENSG00000260484 | 0.499066092 | 0           | lincRNA          | 8  | 54301261  | 54303432         |
| ENSG00000260488 | 0.499066092 | 0.390640832 | antisense        | 16 | 12070708  | 12071707         |
| ENSG00000260490 | 2.471521042 | 0.697730409 | pseudogene       | 15 | 42864125  | 42864628         |
| ENSG00000260493 | 0.499066092 | 0.950786998 | antisense        | 8  | 86084312  | 86089297         |
| ENSG00000260494 | 1.16343121  | 1.667587519 | pseudogene       | 16 | 30548523  | 30549552         |
| ENSG00000260495 | 1.407729925 | 2.334191469 | antisense        | 16 | 81344336  | 81347028         |
| ENSG00000260498 | 1.799000381 | 1.667587519 | processed_transc | 16 | 87807094  | 87812980         |
| ENSG00000260500 | 0.499066092 | 0.390640832 | antisense        | 19 | 7983537   | 7984042          |
| ENSG00000260509 | 0           | 0.390640832 | antisense        | 13 | 25874262  | 25875576         |
| ENSG00000260511 | 0           | 0.390640832 | sense_intronic   | 16 | 79139854  | 79144779         |
| ENSG00000260512 | 0           | 0.390640832 | sense_overlappin | 11 | 106544738 | 106550066        |
| ENSG00000260515 | 2.238690726 | 2.334191469 | lincRNA          | 5  | 10195233  | 10197740         |
| ENSG00000260518 | 3.004694206 | 2.652276565 | pseudogene       | 16 | 33489492  | 33500971         |
| ENSG00000260521 | 3.502389126 | 2.912743273 | lincRNA          | 15 | 95399059  | 95400214         |
| ENSG00000260524 | 0.499066092 | 0.390640832 | pseudogene       | 7  | 99469791  | 99469881         |
| ENSG00000260526 | 2.35979773  | 2.144285137 | antisense        | 4  | 113150717 | 113152752        |
| ENSG00000260528 | 7.840089987 | 7.213370937 | pseudogene       | 16 | 90167798  | 90244752         |
| ENSG00000260531 | 1.960915222 | 2.420525079 | sense_intronic   | 16 | 53727224  | 53728095         |
| ENSG00000260534 | 3.871730003 | 3.368666104 | sense_overlappin | 15 | 72882032  | 72884186         |
| ENSG00000260536 | 2.35979773  | 1.802319292 | antisense        | 20 | 31430934  | 31442063         |
| ENSG00000260539 | 8.605481314 | 8.038049013 | lincRNA          | 16 | 74481325  | 74483790         |
| ENSG00000260541 | 0.499066092 | 0.950786998 | sense_overlappin | 16 | 1891021   | 1893548          |
| ENSG00000260542 | 2.847891871 | 4.342020395 | lincRNA          | 20 | 61088965  | 61091152         |

|                 |             |             |                  |    |           |                    |
|-----------------|-------------|-------------|------------------|----|-----------|--------------------|
| ENSG00000260544 | 1.16343121  | 1.667587519 | lincRNA          | 16 | 32141463  | 32150840           |
| ENSG00000260545 | 0.869158192 | 0.950786998 | antisense        | 16 | 58150789  | 58153257           |
| ENSG00000260549 | 5.286269488 | 5.816437314 | pseudogene       | 16 | 56651388  | 56652730 MT1L      |
| ENSG00000260550 | 0           | 0.390640832 | lincRNA          | 16 | 18581777  | 18583005           |
| ENSG00000260552 | 4.19837882  | 3.493416095 | antisense        | 18 | 33759959  | 33767411           |
| ENSG00000260555 | 0.499066092 | 1.16600992  | lincRNA          | 7  | 149697841 | 149702213          |
| ENSG00000260556 | 4.883502971 | 4.101879561 | processed_transc | 15 | 42189688  | 42190773           |
| ENSG00000260560 | 3.502389126 | 2.420525079 | lincRNA          | 16 | 50671504  | 50674771           |
| ENSG00000260563 | 3.78787645  | 3.714580548 | lincRNA          | 17 | 80251592  | 80252786           |
| ENSG00000260565 | 6.121171528 | 6.82352253  | processed_transc | 16 | 2710350   | 2723445 ERVK13-1   |
| ENSG00000260571 | 0           | 0.390640832 | pseudogene       | 15 | 42605885  | 42606584           |
| ENSG00000260572 | 0.499066092 | 1.353254395 | antisense        | 3  | 160471216 | 160472930          |
| ENSG00000260577 | 0.869158192 | 0.390640832 | antisense        | 16 | 68679283  | 68680071           |
| ENSG00000260578 | 2.10647801  | 3.081239798 | lincRNA          | 18 | 65149028  | 65152203           |
| ENSG00000260579 | 1.960915222 | 2.420525079 | antisense        | 15 | 83782369  | 83783318           |
| ENSG00000260582 | 0.499066092 | 0           | pseudogene       | 15 | 36918875  | 36919976           |
| ENSG00000260583 | 0.499066092 | 1.353254395 | antisense        | 21 | 26955082  | 26955638 LINC00515 |
| ENSG00000260585 | 0.499066092 | 0.697730409 | lincRNA          | X  | 121005722 | 121010718          |
| ENSG00000260586 | 0.499066092 | 0.950786998 | sense_intronic   | 15 | 71634663  | 71640810           |
| ENSG00000260588 | 3.274897671 | 2.579085888 | lincRNA          | 8  | 41685683  | 41687452           |
| ENSG00000260589 | 2.35979773  | 2.652276565 | antisense        | 10 | 17683283  | 17685877           |
| ENSG00000260591 | 1.799000381 | 1.802319292 | lincRNA          | 15 | 75647551  | 75648087           |
| ENSG00000260592 | 1.16343121  | 0           | antisense        | 16 | 19488238  | 19499221           |
| ENSG00000260597 | 2.762599152 | 3.32456471  | lincRNA          | 12 | 54413694  | 54416373           |
| ENSG00000260599 | 0           | 0.390640832 | lincRNA          | 19 | 22703797  | 22710751           |
| ENSG00000260601 | 0           | 0.950786998 | sense_intronic   | 16 | 12639339  | 12640541           |
| ENSG00000260602 | 0           | 0.390640832 | pseudogene       | 15 | 68546971  | 68547238           |
| ENSG00000260603 | 0.499066092 | 0           | sense_intronic   | 16 | 87926544  | 87927291           |
| ENSG00000260604 | 7.787084643 | 7.969895325 | lincRNA          | 6  | 3905144   | 3912213            |
| ENSG00000260608 | 0           | 0.697730409 | antisense        | 15 | 83681413  | 83730597           |
| ENSG00000260609 | 2.238690726 | 2.242360793 | lincRNA          | 16 | 33950099  | 33957115           |
| ENSG00000260610 | 0.869158192 | 0           | pseudogene       | 16 | 32943089  | 32943890           |
| ENSG00000260613 | 0.499066092 | 0           | lincRNA          | 22 | 50226264  | 50231434           |
| ENSG00000260616 | 0.869158192 | 0.390640832 | antisense        | 16 | 50817770  | 50837249           |
| ENSG00000260617 | 0.499066092 | 0           | antisense        | 16 | 88808039  | 88808775           |
| ENSG00000260618 | 1.616589159 | 2.334191469 | antisense        | 15 | 52870039  | 52890906           |
| ENSG00000260621 | 0           | 0.390640832 | antisense        | 16 | 56443232  | 56445595           |
| ENSG00000260625 | 0           | 1.16600992  | antisense        | 16 | 31519792  | 31520569           |
| ENSG00000260626 | 0           | 0.390640832 | lincRNA          | 16 | 33336283  | 33337443           |
| ENSG00000260627 | 4.593635215 | 4.976162367 | lincRNA          | 17 | 5402759   | 5404465            |
| ENSG00000260628 | 1.616589159 | 0.390640832 | pseudogene       | 16 | 31987124  | 32015049           |
| ENSG00000260630 | 5.60078458  | 5.43605125  | processed_transc | 16 | 88729706  | 88753594           |
| ENSG00000260633 | 3.146112541 | 1.518964905 | lincRNA          | 3  | 134066130 | 134068075          |
| ENSG00000260635 | 2.238690726 | 1.353254395 | antisense        | 16 | 22376442  | 22380368           |
| ENSG00000260637 | 1.16343121  | 1.16600992  | lincRNA          | 16 | 89323587  | 89333938           |
| ENSG00000260639 | 0.499066092 | 0.390640832 | pseudogene       | 15 | 34686795  | 34687132           |
| ENSG00000260641 | 2.57521082  | 2.851901313 | antisense        | 4  | 99580055  | 99585701           |
| ENSG00000260643 | 1.16343121  | 0.950786998 | processed_transc | 16 | 81087270  | 81121256           |
| ENSG00000260644 | 0           | 0.390640832 | pseudogene       | 16 | 32752635  | 32787517 HERC2P5   |
| ENSG00000260645 | 1.616589159 | 2.501982735 | lincRNA          | 6  | 81176675  | 81178797           |
| ENSG00000260646 | 1.799000381 | 1.802319292 | lincRNA          | 16 | 1562980   | 1564676            |
| ENSG00000260647 | 1.616589159 | 2.144285137 | antisense        | 17 | 18171394  | 18172142           |
| ENSG00000260648 | 0.869158192 | 0.697730409 | sense_intronic   | 15 | 40524283  | 40528308           |
| ENSG00000260650 | 0           | 0.390640832 | lincRNA          | 16 | 66613886  | 66614619           |
| ENSG00000260651 | 0.499066092 | 0.950786998 | antisense        | 4  | 103421998 | 103422476          |
| ENSG00000260655 | 3.698846687 | 2.334191469 | lincRNA          | 22 | 42318027  | 42319104           |
| ENSG00000260660 | 0           | 0.390640832 | antisense        | 15 | 75519094  | 75526292           |
| ENSG00000260661 | 0.499066092 | 0.950786998 | antisense        | 15 | 92691982  | 92874267           |
| ENSG00000260664 | 2.35979773  | 3.027231696 | lincRNA          | 16 | 72459847  | 72463072           |
| ENSG00000260668 | 0.499066092 | 0.950786998 | pseudogene       | 16 | 64294474  | 64295143           |
| ENSG00000260671 | 2.928422289 | 2.579085888 | sense_intronic   | 16 | 87773369  | 87781312           |
| ENSG00000260672 | 0.499066092 | 0           | lincRNA          | 15 | 72908151  | 72910591           |
| ENSG00000260674 | 0           | 0.390640832 | pseudogene       | 15 | 80035653  | 80035808           |

|                 |             |             |                    |    |           |                   |
|-----------------|-------------|-------------|--------------------|----|-----------|-------------------|
| ENSG00000260677 | 0           | 0.390640832 | lincRNA            | 9  | 100505490 | 100507217         |
| ENSG00000260681 | 0.499066092 | 0           | antisense          | 16 | 19422051  | 19422984          |
| ENSG00000260682 | 0.869158192 | 0.390640832 | lincRNA            | 16 | 81993524  | 81996298          |
| ENSG00000260684 | 4.381167248 | 5.43605125  | antisense          | 16 | 30995951  | 30999591          |
| ENSG00000260685 | 0.499066092 | 0           | pseudogene         | 15 | 76242805  | 76243485          |
| ENSG00000260686 | 0.499066092 | 1.802319292 | sense_overlappin   | 5  | 122168051 | 122170228         |
| ENSG00000260689 | 1.16343121  | 0.697730409 | pseudogene         | 15 | 57539161  | 57540091          |
| ENSG00000260690 | 1.16343121  | 0.697730409 | pseudogene         | 16 | 25465660  | 25465968 CYCSP39  |
| ENSG00000260693 | 2.471521042 | 2.971122874 | lincRNA            | 15 | 30832296  | 30838172          |
| ENSG00000260698 | 2.57521082  | 2.420525079 | lincRNA            | 1  | 246845410 | 246848377         |
| ENSG00000260700 | 2.35979773  | 1.925536307 | lincRNA            | 17 | 5675554   | 5834016           |
| ENSG00000260702 | 0.499066092 | 0           | pseudogene         | 16 | 1151261   | 1155461           |
| ENSG00000260708 | 5.729976786 | 6.419292172 | antisense          | 22 | 47157791  | 47158460          |
| ENSG00000260710 | 2.671945279 | 0.697730409 | non_coding         | 16 | 1344552   | 1349167           |
| ENSG00000260711 | 1.616589159 | 0.390640832 | sense_intronic     | 14 | 92223103  | 92226142          |
| ENSG00000260714 | 0           | 0.390640832 | pseudogene         | 16 | 25027299  | 25032344          |
| ENSG00000260718 | 0           | 3.813624741 | lincRNA            | 18 | 52773135  | 52791537          |
| ENSG00000260723 | 0.499066092 | 0.390640832 | sense_intronic     | 16 | 12466669  | 12467756          |
| ENSG00000260727 | 3.077135474 | 3.679994897 | pseudogene         | 16 | 29624425  | 29624961          |
| ENSG00000260728 | 0.869158192 | 0           | sense_overlappin   | 18 | 33296334  | 33297942          |
| ENSG00000260729 | 0.499066092 | 0.697730409 | processed_transc   | 15 | 72577068  | 72668322          |
| ENSG00000260731 | 0           | 0.390640832 | pseudogene         | 16 | 78082380  | 78083794          |
| ENSG00000260733 | 1.616589159 | 1.353254395 | antisense          | 16 | 78529823  | 78540465          |
| ENSG00000260735 | 4.437288965 | 4.101879561 | antisense          | 16 | 15188268  | 15203054          |
| ENSG00000260737 | 0.499066092 | 0           | lincRNA            | 16 | 80600691  | 80606705          |
| ENSG00000260742 | 1.407729925 | 1.353254395 | antisense          | 2  | 182752578 | 182756390         |
| ENSG00000260743 | 1.16343121  | 2.501982735 | sense_overlappin   | 3  | 179058110 | 179059675         |
| ENSG00000260746 | 0           | 0.950786998 | pseudogene         | 16 | 34872994  | 34879551          |
| ENSG00000260747 | 0           | 0.390640832 | pseudogene         | 18 | 65945039  | 65945480          |
| ENSG00000260750 | 1.616589159 | 0.950786998 | lincRNA            | 16 | 87526161  | 87549241          |
| ENSG00000260751 | 3.698846687 | 3.368666104 | sense_intronic     | 16 | 23579994  | 23580912          |
| ENSG00000260754 | 0.499066092 | 0.697730409 | pseudogene         | 19 | 6952511   | 6990857 EMR4P     |
| ENSG00000260757 | 2.471521042 | 3.411459265 | sense_overlappin   | 16 | 31413886  | 31416020          |
| ENSG00000260765 | 0.869158192 | 0.390640832 | pseudogene         | 16 | 55762029  | 55784023          |
| ENSG00000260766 | 4.322773689 | 4.274079748 | sense_overlappin   | 1  | 159994743 | 159996584         |
| ENSG00000260773 | 2.10647801  | 1.518964905 | antisense          | 15 | 66607252  | 66624041          |
| ENSG00000260774 | 4.131913373 | 4.676215056 | processed_transc   | 5  | 214013    | 217394            |
| ENSG00000260776 | 0.869158192 | 0.390640832 | pseudogene         | 15 | 78206559  | 78219188          |
| ENSG00000260777 | 0.869158192 | 1.667587519 | lincRNA            | 17 | 26590660  | 26593395          |
| ENSG00000260778 | 2.35979773  | 3.608232228 | lincRNA            | 16 | 2318156   | 2323419           |
| ENSG00000260782 | 0.499066092 | 0           | pseudogene         | 16 | 46823810  | 46825952          |
| ENSG00000260785 | 0.499066092 | 0           | lincRNA            | 17 | 69093916  | 69198318          |
| ENSG00000260787 | 3.211941663 | 3.081239798 | processed_transc   | 15 | 77334178  | 77335533          |
| ENSG00000260790 | 0           | 0.390640832 | antisense          | 16 | 22386180  | 22389501          |
| ENSG00000260792 | 0.499066092 | 1.16600992  | lincRNA            | 14 | 105127457 | 105131895         |
| ENSG00000260793 | 2.847891871 | 3.232099092 | antisense          | 17 | 42299283  | 42301078          |
| ENSG00000260796 | 1.616589159 | 1.353254395 | antisense          | 16 | 28831891  | 28833354          |
| ENSG00000260800 | 3.146112541 | 3.027231696 | antisense          | 1  | 202099159 | 202100553         |
| ENSG00000260803 | 1.616589159 | 1.16600992  | processed_transc   | 16 | 67514     | 85195             |
| ENSG00000260804 | 5.389447744 | 5.339632724 | lincRNA            | 2  | 217081768 | 217084915         |
| ENSG00000260805 | 3.744048221 | 4.202780776 | lincRNA            | 1  | 212731175 | 212733073         |
| ENSG00000260806 | 3.698846687 | 3.935919592 | antisense          | 14 | 96967147  | 96968658          |
| ENSG00000260808 | 1.16343121  | 1.925536307 | lincRNA            | 11 | 68380367  | 68384179          |
| ENSG00000260810 | 0.499066092 | 0           | lincRNA            | 14 | 91724643  | 91725347          |
| ENSG00000260814 | 1.407729925 | 0.697730409 | processed_transc   | 15 | 42063130  | 42064930          |
| ENSG00000260815 | 0.869158192 | 0.390640832 | pseudogene         | 15 | 76039110  | 76039601          |
| ENSG00000260816 | 0           | 0.950786998 | sense_intronic     | 16 | 78931062  | 78933541          |
| ENSG00000260820 | 1.16343121  | 0.950786998 | antisense          | 16 | 30894453  | 30947457          |
| ENSG00000260821 | 0.499066092 | 0.697730409 | antisense          | 15 | 43691597  | 43692068          |
| ENSG00000260822 | 6.62865285  | 7.151604372 | sense_overlappin X |    | 24563633  | 24568583          |
| ENSG00000260823 | 1.16343121  | 1.518964905 | lincRNA            | 16 | 56643413  | 56645287          |
| ENSG00000260826 | 0           | 0.390640832 | antisense          | 18 | 34814082  | 34816205          |
| ENSG00000260828 | 0           | 0.390640832 | pseudogene         | 16 | 57637049  | 57637609 HMGB3P32 |

|                 |             |             |                  |    |           |                     |
|-----------------|-------------|-------------|------------------|----|-----------|---------------------|
| ENSG00000260830 | 0.499066092 | 1.16600992  | antisense        | 14 | 21852451  | 21853079            |
| ENSG00000260833 | 0.869158192 | 0.697730409 | processed_transc | 17 | 36606675  | 36608643            |
| ENSG00000260837 | 2.762599152 | 2.579085888 | lincRNA          | 2  | 8861264   | 8862816             |
| ENSG00000260840 | 0           | 0.390640832 | lincRNA          | 2  | 85291231  | 85294470            |
| ENSG00000260841 | 3.950976309 | 3.64455972  | sense_overlappin | 5  | 180211782 | 180214869           |
| ENSG00000260852 | 5.389447744 | 5.691786012 | antisense        | 16 | 30930640  | 30934590 FBXL19-AS1 |
| ENSG00000260853 | 4.821592551 | 5.456629825 | antisense        | 16 | 28968008  | 28978204            |
| ENSG00000260855 | 3.603959378 | 4.29708397  | antisense        | 1  | 246935603 | 246939074           |
| ENSG00000260859 | 0.869158192 | 0           | sense_intronic   | 16 | 84861869  | 84862848            |
| ENSG00000260860 | 0.869158192 | 0           | pseudogene       | 16 | 68684935  | 68685856            |
| ENSG00000260865 | 0           | 0.390640832 | pseudogene       | 16 | 58631493  | 58631849            |
| ENSG00000260867 | 0.499066092 | 0           | antisense        | 16 | 58231016  | 58251709            |
| ENSG00000260868 | 2.10647801  | 0           | lincRNA          | 2  | 174890008 | 174891891           |
| ENSG00000260871 | 0           | 0.390640832 | sense_overlappin | 5  | 89684285  | 89685180            |
| ENSG00000260872 | 3.502389126 | 3.993387124 | antisense        | 16 | 15111963  | 15114345            |
| ENSG00000260874 | 1.960915222 | 2.039052734 | lincRNA          | 16 | 2506253   | 2509980             |
| ENSG00000260877 | 2.847891871 | 2.652276565 | lincRNA          | 11 | 69186231  | 69187279            |
| ENSG00000260879 | 1.407729925 | 1.16600992  | antisense        | 1  | 108742548 | 108744113           |
| ENSG00000260882 | 1.407729925 | 0.390640832 | pseudogene       | 16 | 5128169   | 5128606             |
| ENSG00000260884 | 2.57521082  | 3.183544561 | processed_transc | 16 | 74347235  | 74349532            |
| ENSG00000260886 | 0.499066092 | 0           | antisense        | 16 | 71599692  | 71612090            |
| ENSG00000260891 | 1.960915222 | 0.950786998 | antisense        | 16 | 68246304  | 68255574            |
| ENSG00000260895 | 1.16343121  | 0.697730409 | lincRNA          | 11 | 68870961  | 68876562            |
| ENSG00000260896 | 1.16343121  | 1.353254395 | lincRNA          | 16 | 80862632  | 80926492            |
| ENSG00000260898 | 1.16343121  | 0           | processed_transc | 15 | 73075176  | 73090540            |
| ENSG00000260899 | 0.499066092 | 0.390640832 | lincRNA          | 16 | 30751988  | 30762702            |
| ENSG00000260903 | 0           | 0.390640832 | sense_overlappin | 20 | 30586850  | 30591190            |
| ENSG00000260905 | 0           | 0.697730409 | lincRNA          | 16 | 22623864  | 22624804            |
| ENSG00000260907 | 0.499066092 | 2.501982735 | lincRNA          | 17 | 20433355  | 20434194            |
| ENSG00000260908 | 1.799000381 | 1.16600992  | pseudogene       | 16 | 29065053  | 29119429            |
| ENSG00000260910 | 1.16343121  | 2.721932731 | lincRNA          | 13 | 114629487 | 114631817           |
| ENSG00000260911 | 1.407729925 | 2.334191469 | lincRNA          | 16 | 31054471  | 31061201            |
| ENSG00000260912 | 2.762599152 | 2.420525079 | sense_overlappin | 9  | 19453207  | 19455171            |
| ENSG00000260916 | 6.856698814 | 7.370740503 | protein_coding   | 15 | 55632230  | 55700708 CCPG1      |
| ENSG00000260917 | 5.431503808 | 4.857374129 | sense_overlappin | 10 | 114583249 | 114587485           |
| ENSG00000260918 | 1.16343121  | 0.697730409 | sense_overlappin | 4  | 47433977  | 47440976            |
| ENSG00000260920 | 5.158541613 | 5.361622823 | sense_overlappin | 1  | 40929991  | 40932436            |
| ENSG00000260922 | 0           | 0.390640832 | antisense        | 16 | 77268774  | 77324831            |
| ENSG00000260923 | 4.437288965 | 4.841813558 | processed_transc | 16 | 90252405  | 90289086            |
| ENSG00000260924 | 3.211941663 | 4.468996429 | antisense        | 22 | 19158908  | 19160345            |
| ENSG00000260927 | 1.960915222 | 1.353254395 | antisense        | 16 | 58163433  | 58193037            |
| ENSG00000260929 | 0           | 1.925536307 | antisense        | 16 | 50774821  | 50776726            |
| ENSG00000260931 | 0.869158192 | 0           | lincRNA          | 2  | 179265561 | 179267618           |
| ENSG00000260932 | 0.869158192 | 1.16600992  | antisense        | 16 | 83963401  | 83964828            |
| ENSG00000260936 | 1.16343121  | 2.579085888 | sense_intronic   | 16 | 54073305  | 54074638            |
| ENSG00000260938 | 1.799000381 | 0.950786998 | sense_overlappin | 1  | 178449742 | 178450341           |
| ENSG00000260941 | 4.292665995 | 4.622587519 | sense_overlappin | 1  | 120140325 | 120141894           |
| ENSG00000260942 | 4.261916566 | 5.137803333 | antisense        | 2  | 241522117 | 241526116           |
| ENSG00000260944 | 0           | 0.390640832 | antisense        | 16 | 86598751  | 86601367            |
| ENSG00000260947 | 0.499066092 | 0           | lincRNA          | 9  | 33697457  | 33700984            |
| ENSG00000260948 | 3.502389126 | 3.081239798 | sense_overlappin | 1  | 111973668 | 111975690           |
| ENSG00000260949 | 3.077135474 | 3.232099092 | sense_overlappin | 8  | 37920399  | 37921309            |
| ENSG00000260953 | 2.10647801  | 0.950786998 | processed_transc | 16 | 29273594  | 29275800            |
| ENSG00000260954 | 0.869158192 | 1.16600992  | sense_intronic   | 16 | 1629243   | 1630309             |
| ENSG00000260955 | 0.869158192 | 2.144285137 | sense_overlappin | 8  | 54955553  | 54958137            |
| ENSG00000260966 | 4.568725997 | 3.935919592 | sense_overlappin | 11 | 102921416 | 102926528           |
| ENSG00000260971 | 0.499066092 | 0           | lincRNA          | 1  | 56713966  | 56724243            |
| ENSG00000260976 | 0.499066092 | 0           | lincRNA          | 1  | 184970659 | 184977815           |
| ENSG00000260977 | 1.16343121  | 1.353254395 | lincRNA          | 2  | 47004922  | 47007384            |
| ENSG00000260978 | 0           | 0.697730409 | antisense        | 15 | 23812411  | 23814804            |
| ENSG00000260979 | 0           | 1.667587519 | lincRNA          | 16 | 9056563   | 9060847             |
| ENSG00000260986 | 1.407729925 | 1.802319292 | lincRNA          | 15 | 21333027  | 21335424            |
| ENSG00000260988 | 0.499066092 | 1.518964905 | lincRNA          | 15 | 78433585  | 78435515            |

|                 |             |             |                    |    |           |           |
|-----------------|-------------|-------------|--------------------|----|-----------|-----------|
| ENSG00000260989 | 0           | 1.353254395 | antisense          | 16 | 1630528   | 1660329   |
| ENSG00000260992 | 1.616589159 | 2.652276565 | antisense          | 13 | 99740073  | 99740879  |
| ENSG00000260996 | 0.499066092 | 0.390640832 | sense_overlappin   | 9  | 140188320 | 140190173 |
| ENSG00000260997 | 0.499066092 | 0.390640832 | sense_overlappin   | 7  | 44998598  | 45000508  |
| ENSG00000261000 | 1.16343121  | 1.16600992  | antisense          | 1  | 206677281 | 206677789 |
| ENSG00000261002 | 1.799000381 | 0.697730409 | antisense          | 15 | 42500611  | 42519188  |
| ENSG00000261003 | 1.16343121  | 0.950786998 | sense_overlappin   | 6  | 170723227 | 170728413 |
| ENSG00000261005 | 3.950976309 | 4.42790041  | sense_overlappin   | 17 | 36858705  | 36861000  |
| ENSG00000261008 | 4.097495944 | 3.714580548 | processed_transc   | 16 | 72317208  | 72698908  |
| ENSG00000261013 | 0.499066092 | 0           | lincRNA            | 16 | 56217638  | 56220218  |
| ENSG00000261015 | 3.911897206 | 3.32456471  | sense_overlappin   | 6  | 3025025   | 3027659   |
| ENSG00000261019 | 2.238690726 | 1.518964905 | lincRNA            | 7  | 42940871  | 42942238  |
| ENSG00000261024 | 0           | 0.697730409 | processed_transc   | 1  | 185290288 | 185304171 |
| ENSG00000261026 | 2.847891871 | 0.390640832 | sense_overlappin   | 8  | 22536526  | 22541522  |
| ENSG00000261033 | 1.16343121  | 1.518964905 | antisense          | 17 | 19911364  | 19912547  |
| ENSG00000261038 | 0.499066092 | 0           | lincRNA            | 6  | 93097559  | 93098545  |
| ENSG00000261039 | 1.16343121  | 1.925536307 | lincRNA            | 6  | 169575401 | 169582835 |
| ENSG00000261040 | 8.05038018  | 9.451361852 | sense_overlappin   | 17 | 58160927  | 58165654  |
| ENSG00000261045 | 0           | 0.390640832 | lincRNA            | 16 | 27169775  | 27187908  |
| ENSG00000261049 | 0           | 1.667587519 | antisense          | 16 | 54060048  | 54088495  |
| ENSG00000261050 | 3.393122761 | 3.133298822 | sense_overlappin   | 3  | 150181245 | 150184218 |
| ENSG00000261051 | 4.097495944 | 4.226940739 | sense_overlappin   | 3  | 145777372 | 145779466 |
| ENSG00000261052 | 4.517578978 | 4.101879561 | protein_coding     | 16 | 30205754  | 30215631  |
| ENSG00000261053 | 1.16343121  | 0.950786998 | pseudogene         | 16 | 34320267  | 34320490  |
| ENSG00000261054 | 0           | 0.390640832 | antisense          | 15 | 99669037  | 99672011  |
| ENSG00000261055 | 0.499066092 | 1.802319292 | lincRNA            | 1  | 110438595 | 110440483 |
| ENSG00000261056 | 1.616589159 | 1.667587519 | pseudogene         | 16 | 53332136  | 53333705  |
| ENSG00000261060 | 0.869158192 | 0           | sense_overlappin   | 1  | 179559507 | 179560440 |
| ENSG00000261061 | 6.014532757 | 5.9163892   | processed_transc   | 16 | 81064375  | 81065090  |
| ENSG00000261062 | 2.35979773  | 2.501982735 | sense_overlappin   | 20 | 10381657  | 10384178  |
| ENSG00000261064 | 0.499066092 | 2.144285137 | processed_transc   | 15 | 32828248  | 32879814  |
| ENSG00000261067 | 4.026095388 | 4.547834947 | processed_transc   | 16 | 28986125  | 29002096  |
| ENSG00000261068 | 3.211941663 | 2.039052734 | lincRNA            | 6  | 42059976  | 42061997  |
| ENSG00000261069 | 3.554067925 | 2.971122874 | sense_intronic     | 15 | 25332808  | 25334043  |
| ENSG00000261070 | 1.16343121  | 1.667587519 | lincRNA            | 11 | 68914696  | 68939032  |
| ENSG00000261071 | 3.989024711 | 4.048652948 | antisense          | 6  | 13614343  | 13615387  |
| ENSG00000261072 | 0           | 0.697730409 | pseudogene         | 15 | 56484555  | 56485482  |
| ENSG00000261079 | 1.960915222 | 0.950786998 | lincRNA            | 16 | 74401360  | 74403724  |
| ENSG00000261080 | 0           | 0.950786998 | processed_transc   | 6  | 45541083  | 45544507  |
| ENSG00000261083 | 0           | 0.390640832 | lincRNA            | 4  | 125421097 | 125479589 |
| ENSG00000261087 | 3.554067925 | 2.912743273 | lincRNA            | 8  | 102179033 | 102181857 |
| ENSG00000261088 | 6.699208722 | 6.582669759 | lincRNA            | 16 | 66923072  | 66924996  |
| ENSG00000261089 | 1.799000381 | 1.802319292 | pseudogene         | 16 | 28425024  | 28426339  |
| ENSG00000261092 | 0           | 0.390640832 | lincRNA            | 16 | 50424827  | 50429044  |
| ENSG00000261094 | 4.261916566 | 4.777836593 | sense_overlappin   | 9  | 125699902 | 125702612 |
| ENSG00000261096 | 2.35979773  | 1.802319292 | sense_overlappin   | 2  | 232674556 | 232677062 |
| ENSG00000261098 | 4.261916566 | 4.021284656 | lincRNA            | 11 | 107182858 | 107186997 |
| ENSG00000261100 | 1.799000381 | 2.501982735 | antisense          | 16 | 30784853  | 30787354  |
| ENSG00000261101 | 2.10647801  | 2.420525079 | sense_overlappin X | 16 | 100882858 | 100883508 |
| ENSG00000261102 | 0.499066092 | 0           | pseudogene         | 15 | 66707272  | 66707536  |
| ENSG00000261104 | 3.274897671 | 0           | lincRNA            | 2  | 9246722   | 9249994   |
| ENSG00000261105 | 0           | 0.697730409 | processed_transc   | 13 | 76178836  | 76210130  |
| ENSG00000261113 | 4.230497448 | 3.748356452 | antisense          | 16 | 22298029  | 22300059  |
| ENSG00000261114 | 3.698846687 | 3.87606762  | sense_intronic     | 16 | 56974940  | 56975638  |
| ENSG00000261115 | 0.499066092 | 1.667587519 | protein_coding     | 7  | 140774032 | 141180180 |
| ENSG00000261117 | 0           | 0.390640832 | lincRNA            | 2  | 12855541  | 12856353  |
| ENSG00000261118 | 2.928422289 | 2.721932731 | processed_transc   | 16 | 89558425  | 89570868  |
| ENSG00000261122 | 4.642199401 | 7.830998152 | ncrna_host         | 16 | 34977639  | 34990886  |
| ENSG00000261123 | 2.762599152 | 2.242360793 | sense_intronic     | 16 | 2144831   | 2147027   |
| ENSG00000261124 | 1.407729925 | 1.16600992  | antisense          | 16 | 31076816  | 31080567  |
| ENSG00000261126 | 4.292665995 | 5.886365696 | lincRNA            | 18 | 77794346  | 77854968  |
| ENSG00000261128 | 6.163378456 | 6.544728831 | lincRNA            | 16 | 80631803  | 80636416  |
| ENSG00000261131 | 0.499066092 | 0           | sense_intronic     | 16 | 46694608  | 46695503  |

|                 |             |             |                   |    |           |                    |
|-----------------|-------------|-------------|-------------------|----|-----------|--------------------|
| ENSG00000261133 | 5.175139844 | 3.570966319 | antisense         | 16 | 783055    | 785525             |
| ENSG00000261135 | 2.57521082  | 1.802319292 | lincRNA           | 1  | 16841140  | 16842249           |
| ENSG00000261136 | 1.616589159 | 3.232099092 | antisense         | 15 | 40074772  | 40077818           |
| ENSG00000261139 | 3.146112541 | 3.87606762  | processed_transc  | 8  | 145721763 | 145725663          |
| ENSG00000261140 | 4.517578978 | 4.7279204   | antisense         | 16 | 2619044   | 2621937            |
| ENSG00000261141 | 1.960915222 | 1.353254395 | antisense         | 16 | 81088906  | 81090031           |
| ENSG00000261143 | 1.407729925 | 1.353254395 | pseudogene        | 15 | 78268384  | 78285399           |
| ENSG00000261147 | 1.407729925 | 0.697730409 | protein_coding    | 15 | 90792788  | 90815440           |
| ENSG00000261156 | 0           | 0.390640832 | lincRNA           | 17 | 32496391  | 32509117           |
| ENSG00000261158 | 1.16343121  | 0.390640832 | antisense         | 16 | 12853139  | 12855019           |
| ENSG00000261159 | 2.57521082  | 1.802319292 | lincRNA           | 3  | 128578559 | 128579369          |
| ENSG00000261167 | 3.274897671 | 3.748356452 | sense_overlappin  | 3  | 131173970 | 131177442          |
| ENSG00000261168 | 1.16343121  | 1.802319292 | sense_overlappin  | 1  | 151102551 | 151104086          |
| ENSG00000261170 | 0           | 0.697730409 | processed_transc  | 16 | 74456018  | 74469152           |
| ENSG00000261173 | 0.499066092 | 0           | antisense         | 16 | 47007900  | 47012894           |
| ENSG00000261175 | 0           | 0.390640832 | processed_transc  | 16 | 86755697  | 86771432           |
| ENSG00000261183 | 2.928422289 | 0           | antisense         | 15 | 41128006  | 41136585           |
| ENSG00000261186 | 0           | 1.16600992  | antisense         | 2  | 243029505 | 243030608          |
| ENSG00000261187 | 0.499066092 | 1.353254395 | lincRNA           | 15 | 72757469  | 72758603           |
| ENSG00000261188 | 5.054730169 | 5.35066967  | antisense         | 22 | 26908503  | 26910534           |
| ENSG00000261189 | 3.603959378 | 2.912743273 | antisense         | 6  | 7540684   | 7541571            |
| ENSG00000261192 | 0           | 0.697730409 | pseudogene        | 17 | 55122839  | 55124158 RNF126P1  |
| ENSG00000261193 | 0           | 0.390640832 | processed_transc  | 16 | 88112767  | 88120989           |
| ENSG00000261195 | 0.499066092 | 0.390640832 | antisense         | 16 | 19772494  | 19777421           |
| ENSG00000261200 | 2.35979773  | 2.721932731 | lincRNA           | 16 | 33344309  | 33348279           |
| ENSG00000261202 | 1.799000381 | 1.353254395 | lincRNA           | 22 | 40439072  | 40440534           |
| ENSG00000261204 | 1.407729925 | 1.518964905 | sense_overlappin  | 19 | 637105    | 637537             |
| ENSG00000261205 | 0.499066092 | 0           | pseudogene        | 15 | 75544082  | 75545277           |
| ENSG00000261207 | 2.471521042 | 3.32456471  | antisense         | 16 | 1801560   | 1802263            |
| ENSG00000261211 | 2.671945279 | 3.027231696 | lincRNA           | 6  | 6680542   | 6683866            |
| ENSG00000261212 | 0.499066092 | 0.390640832 | sense_overlappinX |    | 140267420 | 140267773          |
| ENSG00000261215 | 0.869158192 | 0.390640832 | processed_transc  | 9  | 34661900  | 34666026           |
| ENSG00000261216 | 2.471521042 | 1.16600992  | antisense         | 16 | 12002065  | 12002773           |
| ENSG00000261219 | 0.499066092 | 0           | lincRNA           | 15 | 58012493  | 58013126           |
| ENSG00000261220 | 3.448790144 | 3.679994897 | antisense         | 8  | 134584414 | 134586104          |
| ENSG00000261221 | 8.869173944 | 8.785751426 | protein_coding    | 19 | 56116771  | 56128635 ZNF865    |
| ENSG00000261223 | 0           | 0.697730409 | antisense         | 1  | 70607065  | 70610047           |
| ENSG00000261229 | 0           | 0.390640832 | lincRNA           | 15 | 80135889  | 80136646           |
| ENSG00000261231 | 0.499066092 | 0           | lincRNA           | 16 | 47892490  | 47942342           |
| ENSG00000261239 | 0           | 0.390640832 | pseudogene        | 16 | 46503574  | 46603009 ANKRD26P1 |
| ENSG00000261240 | 0.499066092 | 0.390640832 | antisense         | 16 | 2162336   | 2163343            |
| ENSG00000261242 | 0           | 1.518964905 | antisense         | 14 | 64010287  | 64011382           |
| ENSG00000261243 | 1.799000381 | 0.950786998 | antisense         | 16 | 84529205  | 84531101           |
| ENSG00000261247 | 0           | 0.390640832 | protein_coding    | 15 | 30427352  | 30437770           |
| ENSG00000261251 | 1.407729925 | 2.971122874 | antisense         | 22 | 44208336  | 44213274           |
| ENSG00000261252 | 1.16343121  | 0.697730409 | lincRNA           | 1  | 211608414 | 211608675          |
| ENSG00000261253 | 3.393122761 | 3.027231696 | antisense         | 16 | 89387541  | 89391518           |
| ENSG00000261254 | 3.393122761 | 3.781359661 | sense_overlappin  | 1  | 100496122 | 100501188          |
| ENSG00000261255 | 3.393122761 | 3.714580548 | antisense         | 16 | 67551610  | 67562578           |
| ENSG00000261257 | 0           | 0.390640832 | lincRNA           | 11 | 125970400 | 125972308          |
| ENSG00000261265 | 0.499066092 | 0           | lincRNA           | 15 | 57819385  | 57821207           |
| ENSG00000261266 | 1.616589159 | 1.802319292 | antisense         | 16 | 23698370  | 23699665           |
| ENSG00000261267 | 1.16343121  | 0.697730409 | antisense         | 16 | 48593572  | 48621314           |
| ENSG00000261269 | 0.499066092 | 0           | sense_overlappin  | 5  | 71735730  | 71738214           |
| ENSG00000261270 | 3.393122761 | 3.532712221 | sense_intronic    | 16 | 56974190  | 56975254           |
| ENSG00000261272 | 0.499066092 | 0.697730409 | protein_coding    | 6  | 30978251  | 31003179 MUC22     |
| ENSG00000261273 | 0           | 0.950786998 | processed_transc  | 16 | 88268391  | 88336117           |
| ENSG00000261278 | 0.869158192 | 0           | pseudogene        | 16 | 60058482  | 60059045           |
| ENSG00000261279 | 0           | 0.390640832 | pseudogene        | 15 | 32698798  | 32727193 ULK4P2    |
| ENSG00000261280 | 2.10647801  | 2.912743273 | sense_overlappin  | 19 | 12456773  | 12458752           |
| ENSG00000261286 | 3.335220907 | 2.501982735 | antisense         | 16 | 84492865  | 84500967           |
| ENSG00000261291 | 0.499066092 | 0.390640832 | sense_intronic    | 16 | 53202434  | 53203362           |
| ENSG00000261294 | 1.16343121  | 1.802319292 | antisense         | 16 | 1256560   | 1257124            |

|                 |             |             |                  |   |    |           |                 |
|-----------------|-------------|-------------|------------------|---|----|-----------|-----------------|
| ENSG00000261295 | 3.78787645  | 3.570966319 | antisense        | X |    | 99928327  | 99928978        |
| ENSG00000261296 | 0.499066092 | 0.697730409 | lincRNA          |   | 15 | 62566362  | 62570564        |
| ENSG00000261298 | 0           | 0.390640832 | lincRNA          |   | 2  | 235131482 | 235133158       |
| ENSG00000261302 | 0.869158192 | 0.697730409 | antisense        |   | 16 | 56742684  | 56763880        |
| ENSG00000261303 | 0.499066092 | 0           | pseudogene       |   | 15 | 78952986  | 79027837        |
| ENSG00000261305 | 5.889353623 | 3.906303962 | sense_overlappin |   | 7  | 150038860 | 150039696       |
| ENSG00000261311 | 2.671945279 | 3.32456471  | lincRNA          |   | 1  | 92864531  | 92867613        |
| ENSG00000261312 | 0.499066092 | 0           | antisense        |   | 16 | 19717673  | 19726705        |
| ENSG00000261315 | 1.16343121  | 0.950786998 | pseudogene       |   | 15 | 36909290  | 36911468 LARP4P |
| ENSG00000261317 | 0           | 0.390640832 | antisense        |   | 16 | 90036199  | 90038952        |
| ENSG00000261320 | 0.499066092 | 0           | lincRNA          |   | 16 | 67464570  | 67465367        |
| ENSG00000261324 | 5.869093502 | 5.236305879 | sense_overlappin |   | 12 | 14915438  | 14920865        |
| ENSG00000261326 | 4.6658819   | 5.446377228 | lincRNA          |   | 1  | 23607802  | 23613245        |
| ENSG00000261329 | 0.499066092 | 0.697730409 | antisense        |   | 16 | 27690261  | 27730104        |
| ENSG00000261330 | 0           | 0.950786998 | pseudogene       |   | 16 | 77926319  | 77926812        |
| ENSG00000261334 | 0.499066092 | 0.950786998 | lincRNA          |   | 9  | 132242884 | 132244817       |
| ENSG00000261335 | 1.407729925 | 3.133298822 | antisense        |   | 17 | 74668024  | 74669740        |
| ENSG00000261336 | 0           | 0.950786998 | pseudogene       |   | 16 | 47599001  | 47600795        |
| ENSG00000261337 | 3.393122761 | 2.144285137 | antisense        |   | 16 | 71952815  | 71959638        |
| ENSG00000261338 | 1.960915222 | 1.667587519 | sense_overlappin |   | 2  | 219120042 | 219122087       |
| ENSG00000261341 | 1.616589159 | 1.518964905 | lincRNA          |   | 19 | 51279398  | 51289467        |
| ENSG00000261342 | 5.899377978 | 5.383282767 | sense_overlappin |   | 19 | 2727741   | 2729325         |
| ENSG00000261343 | 4.962122459 | 4.693656882 | antisense        |   | 19 | 20318001  | 20320598        |
| ENSG00000261344 | 2.238690726 | 2.420525079 | antisense        |   | 16 | 53075374  | 53078138        |
| ENSG00000261349 | 0           | 0.950786998 | pseudogene       |   | 1  | 25592593  | 25593627        |
| ENSG00000261351 | 3.652182994 | 3.845183986 | antisense        |   | 15 | 66782086  | 66784447        |
| ENSG00000261353 | 2.928422289 | 3.368666104 | lincRNA          |   | 6  | 26527291  | 26527632        |
| ENSG00000261355 | 5.207774174 | 4.319727133 | sense_overlappin |   | 11 | 35835882  | 35839557        |
| ENSG00000261357 | 1.407729925 | 1.353254395 | lincRNA          |   | 16 | 19077313  | 19078016        |
| ENSG00000261360 | 1.407729925 | 2.501982735 | antisense        |   | 5  | 14661917  | 14664713        |
| ENSG00000261366 | 1.616589159 | 1.667587519 | antisense        |   | 6  | 96023059  | 96025326        |
| ENSG00000261367 | 0           | 0.390640832 | antisense        |   | 16 | 30118996  | 30121862        |
| ENSG00000261369 | 0           | 0.697730409 | antisense        |   | 16 | 47333358  | 47351725        |
| ENSG00000261372 | 1.16343121  | 0.950786998 | sense_overlappin |   | 14 | 92511119  | 92516990        |
| ENSG00000261373 | 8.954578658 | 8.40394723  | antisense        |   | 16 | 89778264  | 89784573        |
| ENSG00000261374 | 0.499066092 | 0.950786998 | sense_overlappin |   | 15 | 40666599  | 40668192        |
| ENSG00000261377 | 1.407729925 | 0.950786998 | pseudogene       |   | 15 | 29034810  | 29101361        |
| ENSG00000261379 | 0.499066092 | 0.390640832 | lincRNA          |   | 2  | 227668752 | 227669777       |
| ENSG00000261384 | 0.499066092 | 0.697730409 | sense_intronic   |   | 15 | 74595346  | 74596684        |
| ENSG00000261386 | 0.499066092 | 0.697730409 | lincRNA          |   | 16 | 67583122  | 67583636        |
| ENSG00000261389 | 3.146112541 | 3.906303962 | lincRNA          |   | 16 | 54033349  | 54048240        |
| ENSG00000261392 | 2.10647801  | 0.950786998 | lincRNA          |   | 16 | 9162411   | 9166269         |
| ENSG00000261394 | 0           | 0.950786998 | antisense        |   | 16 | 12460839  | 12466439        |
| ENSG00000261396 | 0.499066092 | 0.697730409 | antisense        |   | 16 | 67572460  | 67574009        |
| ENSG00000261399 | 0.869158192 | 0           | antisense        |   | 16 | 1763528   | 1764209         |
| ENSG00000261405 | 0.869158192 | 0.390640832 | pseudogene       |   | 16 | 33365116  | 33374140        |
| ENSG00000261408 | 2.671945279 | 3.232099092 | processed_transc |   | 17 | 73975312  | 74002080        |
| ENSG00000261416 | 0.499066092 | 0           | antisense        |   | 16 | 30194826  | 30196278        |
| ENSG00000261420 | 0           | 1.16600992  | antisense        |   | 6  | 166796677 | 166798312       |
| ENSG00000261422 | 2.10647801  | 1.925536307 | 3prime_overlapp  |   | 16 | 15506577  | 15507125        |
| ENSG00000261423 | 2.928422289 | 2.971122874 | lincRNA          |   | 15 | 72700119  | 72767509        |
| ENSG00000261425 | 0.869158192 | 1.353254395 | lincRNA          |   | 15 | 68591128  | 68593343        |
| ENSG00000261428 | 4.464551814 | 3.608232228 | antisense        |   | 2  | 223431624 | 223434438       |
| ENSG00000261430 | 0           | 0.697730409 | sense_intronic   |   | 16 | 1517674   | 1522685         |
| ENSG00000261431 | 0.499066092 | 2.039052734 | antisense        |   | 20 | 37590568  | 37590754        |
| ENSG00000261433 | 0.499066092 | 1.353254395 | sense_overlappin |   | 17 | 10561859  | 10562399        |
| ENSG00000261434 | 0.499066092 | 0.390640832 | sense_overlappin |   | 5  | 195893    | 196456          |
| ENSG00000261436 | 0           | 1.16600992  | processed_transc |   | 16 | 60393746  | 60476149        |
| ENSG00000261437 | 0.499066092 | 0           | antisense        |   | 8  | 95649513  | 95651695        |
| ENSG00000261438 | 1.799000381 | 0.390640832 | sense_overlappin |   | 10 | 90775593  | 90776816        |
| ENSG00000261439 | 0.499066092 | 1.667587519 | antisense        |   | 16 | 56226526  | 56228430        |
| ENSG00000261441 | 1.407729925 | 1.802319292 | antisense        |   | 15 | 89878284  | 89879392        |
| ENSG00000261442 | 1.616589159 | 2.039052734 | antisense        |   | 16 | 4684330   | 4690624         |

|                 |             |             |                  |    |           |                    |
|-----------------|-------------|-------------|------------------|----|-----------|--------------------|
| ENSG00000261447 | 0           | 0.390640832 | lincRNA          | 9  | 72287665  | 72288629           |
| ENSG00000261451 | 0.499066092 | 1.353254395 | sense_overlappin | 8  | 10291182  | 10295822           |
| ENSG00000261452 | 3.077135474 | 1.925536307 | lincRNA          | 2  | 25380063  | 25382006           |
| ENSG00000261455 | 4.543379137 | 5.456629825 | lincRNA          | 7  | 152160871 | 152162634          |
| ENSG00000261460 | 0.499066092 | 1.353254395 | antisense        | 15 | 72571208  | 72644135           |
| ENSG00000261461 | 2.238690726 | 2.144285137 | pseudogene       | 16 | 34404063  | 34404612 UBE2MP1   |
| ENSG00000261462 | 0.499066092 | 0           | lincRNA          | 7  | 86738855  | 86740598           |
| ENSG00000261465 | 0           | 0.697730409 | antisense        | 16 | 19074184  | 19079013           |
| ENSG00000261466 | 0           | 0.697730409 | lincRNA          | 16 | 33350764  | 33357451           |
| ENSG00000261467 | 1.407729925 | 1.667587519 | lincRNA          | 7  | 73400322  | 73403097           |
| ENSG00000261468 | 2.57521082  | 1.925536307 | sense_overlappin | 3  | 30739153  | 30741068           |
| ENSG00000261469 | 0           | 1.353254395 | sense_intronic   | 16 | 68270748  | 68271570           |
| ENSG00000261471 | 3.004694206 | 2.334191469 | antisense        | 16 | 84627999  | 84630432           |
| ENSG00000261474 | 4.322773689 | 3.845183986 | antisense        | 16 | 31460856  | 31464814           |
| ENSG00000261476 | 1.16343121  | 1.16600992  | sense_intronic   | 16 | 75492150  | 75493915           |
| ENSG00000261480 | 0.499066092 | 0.950786998 | lincRNA          | 15 | 28964523  | 28983577           |
| ENSG00000261481 | 0.499066092 | 0.697730409 | antisense        | 16 | 8963108   | 8963889            |
| ENSG00000261485 | 1.616589159 | 2.242360793 | antisense        | 13 | 28710980  | 28712330 PAN3-AS1  |
| ENSG00000261487 | 0           | 0.390640832 | protein_coding   | 16 | 30959707  | 30967832           |
| ENSG00000261488 | 4.464551814 | 4.127774132 | antisense        | 3  | 111852270 | 111854206          |
| ENSG00000261490 | 4.593635215 | 4.508954154 | sense_overlappin | 4  | 10069713  | 10074643           |
| ENSG00000261504 | 0.869158192 | 1.802319292 | lincRNA          | 1  | 182584389 | 182585764          |
| ENSG00000261505 | 5.752272083 | 5.526427614 | antisense        | 16 | 1367892   | 1372846            |
| ENSG00000261513 | 0           | 1.518964905 | antisense        | 16 | 71757083  | 71758133           |
| ENSG00000261519 | 0.499066092 | 0.697730409 | lincRNA          | 16 | 66583183  | 66585092           |
| ENSG00000261521 | 0.869158192 | 0           | sense_overlappin | 18 | 28638806  | 28639359           |
| ENSG00000261526 | 5.036678094 | 5.683080141 | sense_overlappin | 19 | 1874881   | 1876168            |
| ENSG00000261527 | 0.499066092 | 0.390640832 | pseudogene       | 16 | 69477143  | 69478193           |
| ENSG00000261528 | 0.869158192 | 0.697730409 | pseudogene       | 16 | 23512226  | 23512985           |
| ENSG00000261529 | 0           | 0.697730409 | sense_intronic   | 15 | 25590780  | 25592382           |
| ENSG00000261533 | 2.35979773  | 1.353254395 | sense_overlappin | 3  | 99898411  | 99900574           |
| ENSG00000261534 | 5.458875168 | 4.990346085 | sense_overlappin | 9  | 124577953 | 124581731          |
| ENSG00000261537 | 0.499066092 | 0.950786998 | sense_intronic   | 16 | 79028242  | 79038627           |
| ENSG00000261541 | 0.869158192 | 2.144285137 | lincRNA          | 16 | 32465933  | 32470079           |
| ENSG00000261542 | 3.448790144 | 2.971122874 | sense_overlappin | 8  | 64128539  | 64130592           |
| ENSG00000261543 | 0           | 0.390640832 | antisense        | 15 | 74445141  | 74471567           |
| ENSG00000261544 | 0.499066092 | 0.390640832 | sense_intronic   | 15 | 66058798  | 66059736           |
| ENSG00000261546 | 0.869158192 | 1.16600992  | antisense        | 16 | 89179583  | 89181687           |
| ENSG00000261549 | 0.499066092 | 0.390640832 | pseudogene       | 15 | 89532755  | 89533475           |
| ENSG00000261550 | 0           | 0.390640832 | antisense        | 16 | 53069602  | 53086785           |
| ENSG00000261553 | 0.869158192 | 1.353254395 | processed_transc | 13 | 76123909  | 76381256           |
| ENSG00000261556 | 3.004694206 | 3.183544561 | pseudogene       | 16 | 70253773  | 70280515           |
| ENSG00000261557 | 2.35979773  | 2.420525079 | pseudogene       | 16 | 27144804  | 27146500 EEF1A1P38 |
| ENSG00000261559 | 1.16343121  | 0           | pseudogene       | 15 | 34786621  | 34788101           |
| ENSG00000261560 | 3.502389126 | 3.32456471  | sense_intronic   | 16 | 11974932  | 11976426           |
| ENSG00000261567 | 0.869158192 | 1.518964905 | protein_coding   | 16 | 85391069  | 85393055           |
| ENSG00000261572 | 1.960915222 | 0.390640832 | sense_intronic   | 3  | 32278180  | 32280070           |
| ENSG00000261574 | 0.499066092 | 0.950786998 | sense_intronic   | 16 | 89458783  | 89478972           |
| ENSG00000261575 | 1.799000381 | 1.667587519 | pseudogene       | 17 | 44344403  | 44346060           |
| ENSG00000261578 | 4.062237333 | 2.501982735 | sense_overlappin | 11 | 76511408  | 76515599           |
| ENSG00000261582 | 3.077135474 | 2.144285137 | antisense        | 20 | 33855688  | 33867846           |
| ENSG00000261584 | 2.471521042 | 3.87606762  | lincRNA          | 6  | 26686469  | 26688192           |
| ENSG00000261588 | 1.799000381 | 1.353254395 | pseudogene       | 16 | 30598983  | 30599241           |
| ENSG00000261589 | 4.464551814 | 4.448594745 | sense_overlappin | 17 | 53246184  | 53250993           |
| ENSG00000261590 | 0.499066092 | 0           | pseudogene       | 16 | 60391118  | 60391378           |
| ENSG00000261592 | 1.960915222 | 0.697730409 | processed_transc | 16 | 87430310  | 87433901           |
| ENSG00000261594 | 0.499066092 | 0           | lincRNA          | 11 | 74953064  | 74954742           |
| ENSG00000261595 | 0.499066092 | 0.390640832 | antisense        | 1  | 113258294 | 113260418          |
| ENSG00000261596 | 1.407729925 | 1.16600992  | sense_intronic   | 16 | 21638063  | 21638723           |
| ENSG00000261597 | 2.471521042 | 2.721932731 | sense_overlappin | 15 | 49944336  | 49948429           |
| ENSG00000261599 | 0           | 0.390640832 | pseudogene       | 16 | 33105525  | 33140411 HERC2P8   |
| ENSG00000261600 | 3.004694206 | 3.64455972  | lincRNA          | 2  | 91768393  | 91768920           |
| ENSG00000261603 | 0.869158192 | 0.390640832 | protein_coding   | 3  | 46761073  | 46777919 PRSS46    |



|                 |             |             |                  |    |           |           |
|-----------------|-------------|-------------|------------------|----|-----------|-----------|
| ENSG00000261604 | 3.603959378 | 1.518964905 | antisense        | 5  | 43287703  | 43290941  |
| ENSG00000261606 | 0.499066092 | 0           | processed_transc | 15 | 75108564  | 75124136  |
| ENSG00000261609 | 7.776245808 | 7.586839732 | lincRNA          | 16 | 81416874  | 81424489  |
| ENSG00000261610 | 0.499066092 | 0.697730409 | lincRNA          | 21 | 33632115  | 33633896  |
| ENSG00000261611 | 0.499066092 | 0.390640832 | protein_coding   | 16 | 71481503  | 71523214  |
| ENSG00000261612 | 1.799000381 | 1.16600992  | pseudogene       | 16 | 4612815   | 4613129   |
| ENSG00000261613 | 8.739861387 | 9.069940847 | antisense        | 16 | 2604061   | 2616295   |
| ENSG00000261614 | 0.869158192 | 0.390640832 | pseudogene       | 16 | 31579707  | 31580796  |
| ENSG00000261616 | 2.57521082  | 2.912743273 | antisense        | 15 | 99679522  | 99685575  |
| ENSG00000261617 | 0           | 0.390640832 | lincRNA          | 16 | 9449445   | 9501950   |
| ENSG00000261618 | 3.603959378 | 3.906303962 | lincRNA          | 8  | 79749764  | 79752757  |
| ENSG00000261620 | 0.499066092 | 0.390640832 | pseudogene       | 16 | 35037240  | 35037651  |
| ENSG00000261625 | 0.499066092 | 0.390640832 | sense_overlappin | 11 | 68768233  | 68769516  |
| ENSG00000261628 | 0           | 0.390640832 | pseudogene       | 15 | 31191683  | 31192530  |
| ENSG00000261630 | 0.499066092 | 0.697730409 | antisense        | 16 | 54015141  | 54015824  |
| ENSG00000261633 | 0.869158192 | 0.390640832 | antisense        | 16 | 57655946  | 57665559  |
| ENSG00000261634 | 1.16343121  | 0.950786998 | processed_transc | 15 | 69570667  | 69591102  |
| ENSG00000261635 | 0.499066092 | 0           | pseudogene       | 15 | 36905675  | 36906104  |
| ENSG00000261639 | 3.652182994 | 3.714580548 | antisense        | 16 | 70695570  | 70699739  |
| ENSG00000261642 | 0.499066092 | 0           | lincRNA          | 1  | 191120640 | 191123764 |
| ENSG00000261643 | 2.928422289 | 2.420525079 | sense_overlappin | 4  | 3505324   | 3506184   |
| ENSG00000261644 | 0           | 3.532712221 | antisense        | 16 | 50769624  | 50774627  |
| ENSG00000261646 | 0           | 0.950786998 | lincRNA          | 4  | 174388984 | 174391192 |
| ENSG00000261647 | 1.16343121  | 0.697730409 | pseudogene       | 16 | 10205239  | 10206742  |
| ENSG00000261652 | 3.077135474 | 3.906303962 | protein_coding   | 15 | 55700746  | 55710910  |
| ENSG00000261654 | 4.062237333 | 3.679994897 | sense_overlappin | 1  | 111478991 | 111484975 |
| ENSG00000261655 | 0.499066092 | 0           | sense_overlappin | 8  | 142363503 | 142365465 |
| ENSG00000261656 | 0.499066092 | 0.697730409 | lincRNA          | 16 | 66503699  | 66515133  |
| ENSG00000261658 | 4.261916566 | 4.976162367 | sense_overlappin | 8  | 70579284  | 70582549  |
| ENSG00000261659 | 0           | 0.697730409 | antisense        | 16 | 739494    | 742554    |
| ENSG00000261662 | 2.10647801  | 2.242360793 | sense_overlappin | 1  | 120451878 | 120453236 |
| ENSG00000261663 | 3.871730003 | 3.87606762  | antisense        | 16 | 2290488   | 2291819   |
| ENSG00000261668 | 3.554067925 | 3.493416095 | antisense        | 4  | 128761353 | 128765195 |
| ENSG00000261669 | 1.407729925 | 0.697730409 | antisense        | 16 | 24814772  | 24831060  |
| ENSG00000261670 | 0.499066092 | 0.697730409 | lincRNA          | 8  | 104476617 | 104481213 |
| ENSG00000261673 | 0           | 0.390640832 | lincRNA          | 16 | 72258464  | 72259043  |
| ENSG00000261680 | 0.499066092 | 0           | pseudogene       | 16 | 30635606  | 30636035  |
| ENSG00000261681 | 0.499066092 | 0.390640832 | processed_transc | 16 | 75539157  | 75551276  |
| ENSG00000261683 | 0           | 0.390640832 | lincRNA          | 10 | 34048641  | 34061586  |
| ENSG00000261685 | 3.652182994 | 3.679994897 | lincRNA          | 16 | 50679720  | 50683060  |
| ENSG00000261690 | 2.762599152 | 3.279072565 | processed_transc | 16 | 29829301  | 29832573  |
| ENSG00000261692 | 0.499066092 | 0.697730409 | sense_intronic   | 16 | 89486483  | 89488634  |
| ENSG00000261693 | 0           | 1.16600992  | antisense        | 8  | 143485013 | 143488389 |
| ENSG00000261697 | 0           | 1.667587519 | processed_transc | 16 | 87296365  | 87326044  |
| ENSG00000261699 | 0           | 0.390640832 | lincRNA          | 15 | 57982562  | 57984896  |
| ENSG00000261703 | 0           | 0.390640832 | protein_coding   | 16 | 50840579  | 50841540  |
| ENSG00000261705 | 5.346128795 | 5.212303549 | lincRNA          | 16 | 66921918  | 66922834  |
| ENSG00000261707 | 0           | 0.697730409 | antisense        | 16 | 77775365  | 77776897  |
| ENSG00000261712 | 1.960915222 | 1.925536307 | lincRNA          | 15 | 79705700  | 79706228  |
| ENSG00000261714 | 0.869158192 | 0.390640832 | pseudogene       | 15 | 75707779  | 75708361  |
| ENSG00000261716 | 7.01259661  | 7.284161038 | sense_overlappin | 1  | 149816065 | 149820591 |
| ENSG00000261723 | 0.869158192 | 1.16600992  | processed_transc | 16 | 23617162  | 23635428  |
| ENSG00000261724 | 1.407729925 | 1.667587519 | antisense        | 18 | 268148    | 270278    |
| ENSG00000261728 | 1.799000381 | 2.242360793 | lincRNA          | 13 | 35499971  | 35502213  |
| ENSG00000261729 | 0           | 0.697730409 | lincRNA          | 1  | 185624134 | 185626300 |
| ENSG00000261731 | 2.35979773  | 2.971122874 | antisense        | 16 | 31720335  | 31723305  |
| ENSG00000261732 | 2.10647801  | 2.788380093 | protein_coding   | 16 | 1682260   | 1736716   |
| ENSG00000261737 | 1.799000381 | 1.353254395 | antisense        | 1  | 87169185  | 87170145  |
| ENSG00000261740 | 4.352265886 | 4.468996429 | protein_coding   | 16 | 29454551  | 29465972  |
| ENSG00000261742 | 2.471521042 | 2.242360793 | lincRNA          | 16 | 65318402  | 65610203  |
| ENSG00000261744 | 2.35979773  | 2.039052734 | antisense        | 16 | 88579368  | 88597461  |
| ENSG00000261745 | 0.499066092 | 0           | sense_overlappin | 6  | 52990445  | 52990944  |
| ENSG00000261750 | 0.499066092 | 0.390640832 | protein_coding   | 16 | 71879899  | 71950997  |

|                 |             |             |                    |    |           |                  |
|-----------------|-------------|-------------|--------------------|----|-----------|------------------|
| ENSG00000261754 | 0.869158192 | 0.390640832 | lincRNA            | 19 | 35302738  | 35305249         |
| ENSG00000261757 | 0           | 0.697730409 | lincRNA            | 5  | 142083347 | 142084986        |
| ENSG00000261758 | 0.869158192 | 1.353254395 | antisense          | 3  | 136471472 | 136474622        |
| ENSG00000261762 | 3.335220907 | 2.652276565 | antisense          | 15 | 78881465  | 78883618         |
| ENSG00000261763 | 0.499066092 | 0.697730409 | processed_transc   | 3  | 139397462 | 139401406        |
| ENSG00000261764 | 0.499066092 | 0.390640832 | pseudogene         | 16 | 72762515  | 72763793         |
| ENSG00000261766 | 1.407729925 | 1.667587519 | antisense          | 16 | 28873487  | 28874661         |
| ENSG00000261770 | 3.146112541 | 4.250702764 | lincRNA            | 19 | 28248092  | 28251757         |
| ENSG00000261773 | 3.004694206 | 0.697730409 | sense_overlappin X |    | 153746164 | 153746955        |
| ENSG00000261774 | 0.499066092 | 0.390640832 | pseudogene         | 16 | 72312167  | 72312467         |
| ENSG00000261775 | 0.499066092 | 0.950786998 | lincRNA            | 15 | 74781943  | 74809300         |
| ENSG00000261777 | 2.471521042 | 3.027231696 | processed_transc   | 16 | 70349543  | 70380650         |
| ENSG00000261780 | 1.616589159 | 0           | lincRNA            | 18 | 70992176  | 71017113         |
| ENSG00000261783 | 1.960915222 | 2.788380093 | processed_transc   | 16 | 75413716  | 75415158         |
| ENSG00000261786 | 5.286269488 | 1.667587519 | lincRNA            | 3  | 44158791  | 44163857         |
| ENSG00000261787 | 0.499066092 | 0.390640832 | protein_coding     | 8  | 67858736  | 67874825 TCF24   |
| ENSG00000261788 | 0           | 1.353254395 | antisense          | 16 | 46737281  | 46737937         |
| ENSG00000261794 | 1.616589159 | 1.802319292 | protein_coding     | 15 | 30896329  | 30906764 GOLGA8H |
| ENSG00000261798 | 0.499066092 | 0.390640832 | antisense          | 1  | 40254648  | 40255843         |
| ENSG00000261799 | 5.672682881 | 5.125003832 | sense_overlappin   | 12 | 383120    | 386289           |
| ENSG00000261801 | 4.903563137 | 4.274079748 | antisense          | 15 | 74200424  | 74220589         |
| ENSG00000261804 | 2.57521082  | 0           | processed_transc   | 16 | 53407405  | 53418657         |
| ENSG00000261812 | 2.238690726 | 1.16600992  | polymorphic_pse    | 16 | 90159562  | 90162762         |
| ENSG00000261813 | 0           | 0.390640832 | pseudogene         | 15 | 75268579  | 75268914         |
| ENSG00000261819 | 1.616589159 | 2.039052734 | pseudogene         | 16 | 15082116  | 15084017         |
| ENSG00000261823 | 0           | 0.697730409 | lincRNA            | 15 | 56700681  | 56702384         |
| ENSG00000261824 | 6.449220685 | 6.799557986 | lincRNA            | 19 | 28221181  | 28237138         |
| ENSG00000261825 | 1.16343121  | 2.334191469 | lincRNA            | 16 | 54024924  | 54028366         |
| ENSG00000261827 | 1.616589159 | 1.802319292 | processed_transc   | 12 | 121625359 | 121625835        |
| ENSG00000261828 | 0           | 0.390640832 | processed_transc   | 15 | 65518810  | 65519035         |
| ENSG00000261829 | 0           | 0.390640832 | sense_overlappin   | 2  | 231916755 | 231917352        |
| ENSG00000261837 | 0           | 0.390640832 | sense_intronic     | 16 | 78568271  | 78569545         |
| ENSG00000261838 | 0.499066092 | 0.950786998 | antisense          | 16 | 81103459  | 81110203         |
| ENSG00000261839 | 0.499066092 | 1.518964905 | lincRNA            | 6  | 28104627  | 28107456         |
| ENSG00000261840 | 3.335220907 | 3.411459265 | antisense          | 16 | 30709030  | 30710379         |
| ENSG00000261842 | 0.499066092 | 0.697730409 | lincRNA            | 7  | 149119766 | 149121981        |
